# Supplementary material
Source: PubMed Central journal article supplement (PMC3790291)

### **Supplemental Figure 1**

Reproducibility of biological replicates.

(A) Pairwise comparisons of three independent *cdc48-3*:WT analyses, demonstrating low coefficients of variation between biological replicates. (B) Same as (A), except two independent analyses for each of the *ubxΔ* mutants are plotted. In these replicates the SILAC labels were switched, hence the negative correlation.

### **Supplemental Figure 2**

Curation of Ub conjugates and overlap with previous screens listed in SCUD.

(A) 2-D plot of protein ratios from the <sup>His8</sup>Ub tagged vs untagged control experiment (x-axis) and the WT <sup>His8</sup>Ub vs WT <sup>His8</sup>Ub control (y-axis). Proteins that were recovered in significantly greater amounts (p-value < 0.05) from the <sup>His8</sup>Ub expressing cells in the tagged vs untagged control experiment and whose tagged vs untagged ratios did not differ by significantly greater than 10% (p-value ≥ 0.01) were deemed candidate Ub conjugates. (B) Overlap of Ub conjugates in the SCUD database with those identified in this publication.

### **Supplemental Figure 3**

Changes in the Ub proteome in *cdc48-3* mutants.

(A) Box and whisker plot of annotation terms demonstrating a significant enrichment in the Ub proteome for a majority of their identified members in the *cdc48-3* mutant relative to WT. Significance is defined as the probability that a random subset of *cdc48-3*:WT ratios would have a 25<sup>th</sup> percentile at least as high

as the 25<sup>th</sup> percentile of the ratios of proteins annotated with the term. Enriched GO Cellular Component (CC) and GO Biological Process (BP) terms are shown. **(B)** Fold changes in enzymes of the Ubiquitin-Proteasome System. Error bars indicate the standard error of the ratios and asterisks indicate significant deviation from 1:1 (p-value < 0.05 after correction by the Benjamini and Hochberg method). Colors indicate magnitude of change.

#### **Supplemental Figure 4**

Changes in the Ub proteome in *ubxΔ* mutants

**(A-E)** Box and whisker plots of annotation terms demonstrating a significant enrichment in the Ub proteome for a majority of their identified members in the corresponding *ubx* mutant. Significance is defined as the probability that a random subset of *ubxΔ*:WT protein ratios would have a 25<sup>th</sup> percentile at least as high as the 25<sup>th</sup> percentile of the ratios of proteins annotated with the term. Enriched GO Cellular Component (CC), GO Biological Process (BP), GO Molecular Function (MF), KEGG Pathway (KFFF), Uniprot Sequence feature (SF), Uniprot Keyword (KW), and Protein Superfamily (PIR) terms are shown.

#### **Supplemental Figure 5**

Orthogonal validation of Mga2 ubiquitin conjugate accumulation. WT, *ubx2Δ*, and *ubx4Δ* cells expressing <sup>myc</sup>Mga2 from a YEplac181 plasmid were grown in YPD at 30°C and native lysates were fractionated on a TUBE2 resin. The input extract and bound fractions were immunoblotted for the myc epitope, Ub, and Dpm1 (input loading control) as indicated.

**Supplemental Table 1** (provided as Excel workbook)

List of all protein groups identified in this study with corresponding ratios in each in mutant.

**Supplemental File 1**

Protein groups file table legend.

**Supplemental File 2**

MS/MS spectra of proteins in screen identified by a single peptide sequence.

**Supplemental Table 2** (provided as Excel workbook)

List of all di-Gly modified lysine sites identified in this study. Modified sites were compared to previous studies and listed if previously identified.

**Supplemental File 3**

di-Gly lysine sites table legend.

**Supplemental File 4**

MS/MS spectra of the 67 ubiquitinated peptides.

**Supplemental Table 3**

Strains used in this study.

| Strain      | Genotype                                                        | Source          |
|-------------|-----------------------------------------------------------------|-----------------|
| RJD<br>4614 | <i>his3Δ1, leu2Δ0, met15Δ0, ura3Δ0, lys2Δ0, MATa</i>            | Open Biosystems |
| RJD<br>6137 | <i>his3Δ1, leu2Δ0, met15Δ0, ura3Δ0, lys2Δ0 ubx2::KANMX MATa</i> | Open Biosystems |

|             |                                                                                                                                |            |
|-------------|--------------------------------------------------------------------------------------------------------------------------------|------------|
|             |                                                                                                                                |            |
| RJD<br>6138 | <i>his3Δ1, leu2Δ0, met15Δ0, ura3Δ0, lys2Δ0, SPT23::MYC-SPT23-V5[HIS] MATa</i>                                                  | This study |
| RJD<br>6139 | <i>his3Δ1, leu2Δ0, met15Δ0, ura3Δ0, lys2Δ0, SPT23::MYC-SPT23-V5[HIS], ubx2::KANMX MATa</i>                                     | This study |
| RJD<br>6140 | <i>his3Δ1, leu2Δ0, met15Δ0, ura3Δ0, lys2Δ0, SPT23::MYC-SPT23-V5[HIS], ubx1::KANMX MATa</i>                                     | This study |
| RJD<br>6141 | <i>his3Δ1, leu2Δ0, met15Δ0, ura3Δ0, lys2Δ0, SPT23::MYC-SPT23-V5[HIS], ubx3::KANMX MATa</i>                                     | This study |
| RJD<br>6142 | <i>his3Δ1, leu2Δ0, met15Δ0, ura3Δ0, lys2Δ0, SPT23::MYC-SPT23-V5[HIS], ubx4::KANMX MATa</i>                                     | This study |
| RJD<br>6143 | <i>his3Δ1, leu2Δ0, met15Δ0, ura3Δ0, lys2Δ0, SPT23::MYC-SPT23-V5[HIS], ubx5::KANMX MATa</i>                                     | This study |
| RJD<br>6144 | <i>his3Δ1, leu2Δ0, met15Δ0, ura3Δ0, lys2Δ0, SPT23::MYC-SPT23-V5[HIS], ubx6::KANMX MATa</i>                                     | This study |
| RJD<br>6145 | <i>his3Δ1, leu2Δ0, met15Δ0, ura3Δ0, lys2Δ0, SPT23::MYC-SPT23-V5[HIS], ubx7::KANMX MATa</i>                                     | This study |
| RJD<br>6146 | <i>his3Δ1, leu2Δ0, met15Δ0, ura3Δ0, lys2Δ0, SPT23::MYC-SPT23-V5[HIS], ubx2::KANMX, ubx4::NATMX, MATa</i>                       | This study |
| RJD<br>6147 | <i>his3Δ1, leu2Δ0, met15Δ0, ura3Δ0, lys2Δ0, SPT23::MYC-SPT23-V5[HIS], ubx2::KANMX, ubx4::KANMX MATa</i>                        | This study |
| RJD<br>4781 | <i>CAN1, lys2::HISMX, arg4::KANMX, leu2-3,-112 his3-11,-15, trp1-1, ura3-1, ade2-1, [pRS316-His8-Ubiquitin], MATa</i>          | D. Chan    |
| RJD<br>4977 | <i>cdc48-3, CAN1, lys2::HISMX, arg4::KANMX, leu2-3,-112 his3-11,-15, trp1-1, ura3-1, ade2-1, [pRS316-His8-Ubiquitin], MATa</i> | This study |
| RJD<br>6148 | <i>his3Δ1, leu2Δ0, met15Δ0, ura3Δ0, lys2Δ0, arg4::HYG, [pRS316-His8-Ubiquitin], MATa</i>                                       | This study |
| RJD<br>6149 | <i>his3Δ1, leu2Δ0, met15Δ0, ura3Δ0, lys2Δ0, arg4::HYG, ubx2::KANMX, [pRS316-His8-Ubiquitin], MATa</i>                          | This study |
| RJD         | <i>his3Δ1, leu2Δ0, met15Δ0, ura3Δ0, lys2Δ0,</i>                                                                                | This study |

|             |                                                                                                       |               |
|-------------|-------------------------------------------------------------------------------------------------------|---------------|
| 6150        | <i>arg4::HYG, ubx3::KANMX, [pRS316-His8-Ubiquitin], MATa</i>                                          |               |
| RJD<br>6151 | <i>his3Δ1, leu2Δ0, met15Δ0, ura3Δ0, lys2Δ0, arg4::HYG, ubx4::KANMX, [pRS316-His8-Ubiquitin], MATa</i> | This study    |
| RJD<br>6152 | <i>his3Δ1, leu2Δ0, met15Δ0, ura3Δ0, lys2Δ0, arg4::HYG, ubx5::KANMX, [pRS316-His8-Ubiquitin], MATa</i> | This study    |
| RJD<br>6153 | <i>his3Δ1, leu2Δ0, met15Δ0, ura3Δ0, lys2Δ0, arg4::HYG, ubx6::KANMX, [pRS316-His8-Ubiquitin], MATa</i> | This study    |
| RJD<br>6154 | <i>his3Δ1, leu2Δ0, met15Δ0, ura3Δ0, lys2Δ0, arg4::HYG, ubx7::KANMX, [pRS316-His8-Ubiquitin], MATa</i> | This study    |
| RJD<br>6155 | <i>his3Δ1, leu2Δ0, met15Δ0, ura3Δ0, lys2Δ0, [pMGA2-MYC-Mga2-LEU], MATa</i>                            | This study    |
| RJD<br>6156 | <i>his3Δ1, leu2Δ0, met15Δ0, ura3Δ0, lys2Δ0, [pMGA2-MYC-Mga2-LEU], ubx2::KANMX, MATa</i>               | This study    |
| RJD<br>6157 | <i>his3Δ1, leu2Δ0, met15Δ0, ura3Δ0, lys2Δ0, [pMGA2-MYC-Mga2-LEU], ubx4::KANMX, MATa</i>               | This study    |
| RJD<br>6158 | <i>his3Δ1, leu2Δ0, met15Δ0, ura3Δ0, lys2Δ0, ubx2::KANMX, rsp5-1, MATa</i>                             | This study    |
| RJD<br>6159 | <i>his3Δ1, leu2Δ0, met15Δ0, ura3Δ0, lys2Δ0, ubx4::KANMX, rsp5-1, MATa</i>                             | This study    |
| RJD<br>4472 | <i>rsp5-1, his4-914ΔR5, lys2-128Δ, ura3-52, GAL2+, MATalpha</i>                                       | J. Huibregtse |
| RJD<br>6160 | <i>his3Δ1, leu2Δ0, met15Δ0, ura3Δ0, lys2Δ0, rsp5::KANMX, MATa</i>                                     | N. Shcherbik  |
| RJD<br>6161 | <i>his3Δ1, leu2Δ0, met15Δ0, ura3Δ0, lys2Δ0, [pGAL-FLAG-SPT23-HA-URA3], MATa</i>                       | This Study    |
| RJD<br>6162 | <i>his3Δ1, leu2Δ0, met15Δ0, ura3Δ0, lys2Δ0, [pGAL-FLAG-SPT23-HA-URA3], ubx2::KANMX, MATa</i>          | This Study    |
| RJD<br>6163 | <i>his3Δ1, leu2Δ0, met15Δ0, ura3Δ0, lys2Δ0, [pGAL-FLAG-SPT23-HA-URA3], ubx4::KAN, MATa</i>            | This Study    |
| RJD         | <i>his3Δ1, leu2Δ0, met15Δ0, ura3Δ0, lys2Δ0,</i>                                                       | This Study    |

|             |                                                                                                                    |                 |
|-------------|--------------------------------------------------------------------------------------------------------------------|-----------------|
| 6164        | <i>[pGAL-FLAG-MGA2-HA-URA3], MATa</i>                                                                              |                 |
| RJD<br>6165 | <i>his3Δ1, leu2Δ0, met15Δ0, ura3Δ0, lys2Δ0, [pGAL-FLAG-MGA2-HA-URA3], ubx2::KAN, MATa</i>                          | This study      |
| RJD<br>6166 | <i>his3Δ1, leu2Δ0, met15Δ0, ura3Δ0, lys2Δ0, [pGAL-FLAG-MGA2-HA-URA3], ubx4::KAN, MATa</i>                          | This study      |
| RJD<br>6167 | <i>his3Δ1, leu2Δ0, met15Δ0, ura3Δ0, lys2Δ0, SPT23::MYC-SPT23-V5[HIS], cdc48-3, MATa</i>                            | This study      |
| RJD<br>6168 | <i>his3Δ1, leu2Δ0, met15Δ0, ura3Δ0, lys2Δ0, SPT23::MYC-SPT23-V5[HIS], npl4-1, MATa</i>                             | This study      |
| RJD<br>6169 | <i>his3Δ1, leu2Δ0, met15Δ0, ura3Δ0, lys2Δ0, SPT23::MYC-SPT23-V5[HIS], ufd1-2, MATa</i>                             | This study      |
| RJD<br>6170 | <i>his3Δ1, leu2Δ0, met15Δ0, ura3Δ0, lys2Δ0, SPT23::MYC-SPT23-V5[HIS], cim3-1, MATa</i>                             | This study      |
| RJD<br>6171 | <i>his3Δ1, leu2Δ0, met15Δ0, ura3Δ0, lys2Δ0, SPT23::MYC-SPT23-V5[HIS], rsp5-1, MATa</i>                             | This study      |
| RJD<br>3166 | <i>his3Δ1, leu2Δ0, met15Δ0, ura3Δ0, lys2Δ0, sel1::SEL1-TAP-HIS3MX, MATa</i>                                        | Open Biosystems |
| RJD<br>6172 | <i>his3Δ1, leu2Δ0, met15Δ0, ura3-1, lys2Δ0, ura3::pGAL-MYC-SPT23-HA, MATa</i>                                      | This study      |
| RJD<br>6173 | <i>his3Δ1, leu2Δ0, met15Δ0, ura3-1, lys2Δ0, ura3::pGAL-MYC-SPT23-HA, sel1::SEL1-TAP-HIS3MX, MATa</i>               | This study      |
| RJD<br>6174 | <i>his3Δ1, leu2Δ0, met15Δ0, ura3Δ0, lys2Δ0, ubx2::KANMX, leu::pUBX2-UBX2(FL), MATa</i>                             | C. Wang         |
| RJD<br>6175 | <i>his3Δ1, leu2Δ0, met15Δ0, ura3Δ0, lys2Δ0, SPT23::MYC-SPT23-V5[HIS], ubx2::KANMX, leu::pUBX2-UBX2(FL), MATa</i>   | This Study      |
| RJD<br>6176 | <i>his3Δ1, leu2Δ0, met15Δ0, ura3Δ0, lys2Δ0, ubx2::KANMX, leu::pUBX2-UBX2(ΔUBA), MATa</i>                           | C. Wang         |
| RJD<br>6177 | <i>his3Δ1, leu2Δ0, met15Δ0, ura3Δ0, lys2Δ0, ubx2::KANMX, SPT23::MYC-SPT23-V5[HIS], leu::pUBX2-UBX2(ΔUBA), MATa</i> | This Study      |
| RJD         | <i>his3Δ1, leu2Δ0, met15Δ0, ura3Δ0, lys2Δ0,</i>                                                                    | C. Wang         |

|             |                                                                                                                       |                 |
|-------------|-----------------------------------------------------------------------------------------------------------------------|-----------------|
| 6178        | <i>ubx2::KANMX, leu::pUBX2-UBX2(ΔUBX), MATa</i>                                                                       |                 |
| RJD<br>6179 | <i>his3Δ1, leu2Δ0, met15Δ0, ura3Δ0, lys2Δ0, ubx2::KANMX, SPT23:MYC-SPT23-V5[HIS], leu::pUBX2-UBX2(ΔUBX), MATa</i>     | This Study      |
| RJD<br>6180 | <i>his3Δ1, leu2Δ0, met15Δ0, ura3Δ0, lys2Δ0, ubx2::KANMX, leu::pUBX2-UBX2(ΔUBAΔUBX), MATa</i>                          | C. Wang         |
| RJD<br>6181 | <i>his3Δ1, leu2Δ0, met15Δ0, ura3Δ0, lys2Δ0, ubx2::KANMX, SPT23:MYC-SPT23-V5[HIS], leu::pUBX2-UBX2(ΔUBAΔUBX), MATa</i> | This Study      |
| RJD<br>6182 | <i>his3Δ1, leu2Δ0, met15Δ0, ura3-1, lys2Δ0, pGAL-MYC-SPT23-HA::URA, ubx2::KANMX, MATa</i>                             | This Study      |
| RJD<br>6183 | <i>his3Δ1, leu2Δ0, met15Δ0, ura3Δ0, lys2Δ0, arg4::HYG, MATa</i>                                                       | This Study      |
| RJD<br>5246 | <i>his3Δ1, leu2Δ0, met15Δ0, ura3Δ0, lys2Δ0, ubx4::KANMX, MATa</i>                                                     | Open Biosystems |
| RJD<br>5772 | <i>his3Δ1, leu2Δ0, met15Δ0, ura3Δ0, lys2Δ0, ubx2::KANMX, ubx4::KANMX, MATa</i>                                        | This Study      |

## Supplemental Table 4

Plasmids used in this study.

| Plasmid     | Description                           | Source         |
|-------------|---------------------------------------|----------------|
| RDB<br>2818 | <i>MYC-MGA2 in YEPlac181</i>          | S. Jentsch     |
| RDB<br>2819 | <i>GAL-MYC-SPT23-HA in YIPlac211</i>  | S. Jentsch     |
| RDB<br>1937 | <i>GAL-FLAG-SPT23-HA in YEPlac181</i> | D. Haines      |
| RDB<br>1938 | <i>GAL-FLAG-MGA2-HA in YEPlac181</i>  | D. Haines      |
| RDB<br>1851 | <i>HIS8-Ubiquitin in pRS316</i>       | Our Laboratory |

## Supplemental Table 5

Primers used for quantitative PCR in this study.

| Gene | Forward Primer                 | Reverse Primer                      |
|------|--------------------------------|-------------------------------------|
| ACT1 | 5' -CTGCCGGTATTGACCAAAC-<br>3' | 5'-CGGTGATTCCTTTTGCATT-<br>3'       |
| OLE1 | 5'-TAATGGGCTCCAAGGAAATG-<br>3' | 5'-<br>CATGGTTGTTCCGGAGATGTG-<br>3' |



A

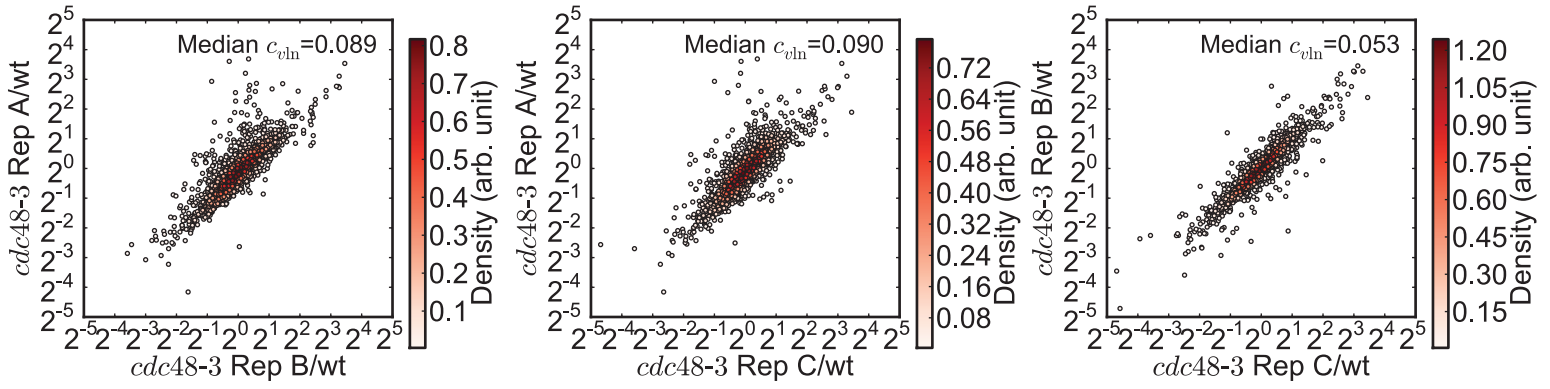

B

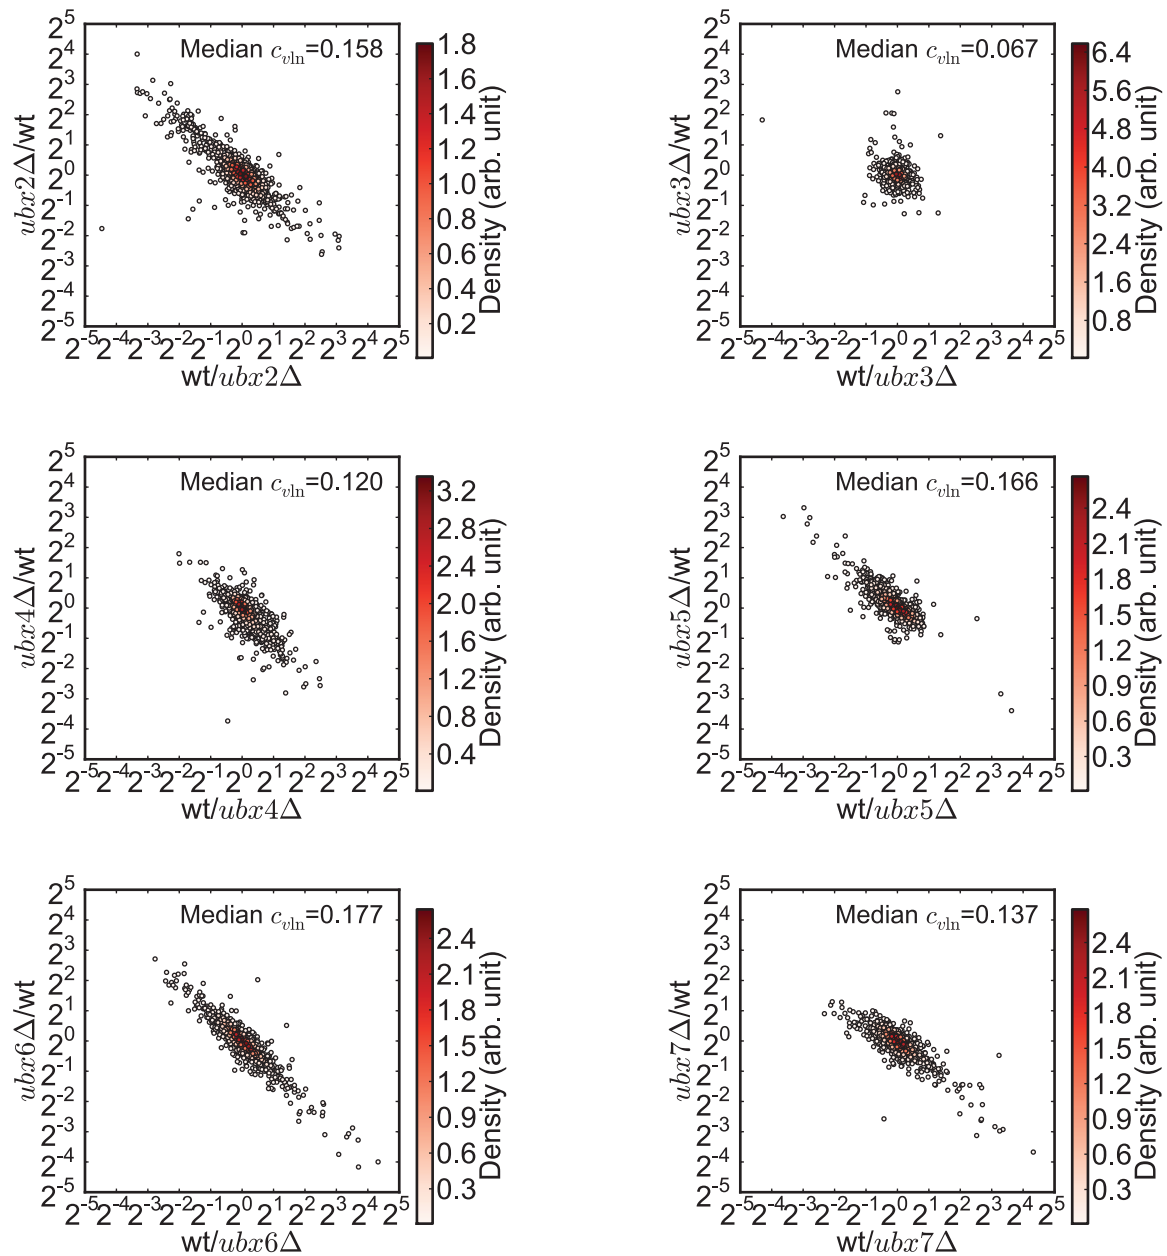

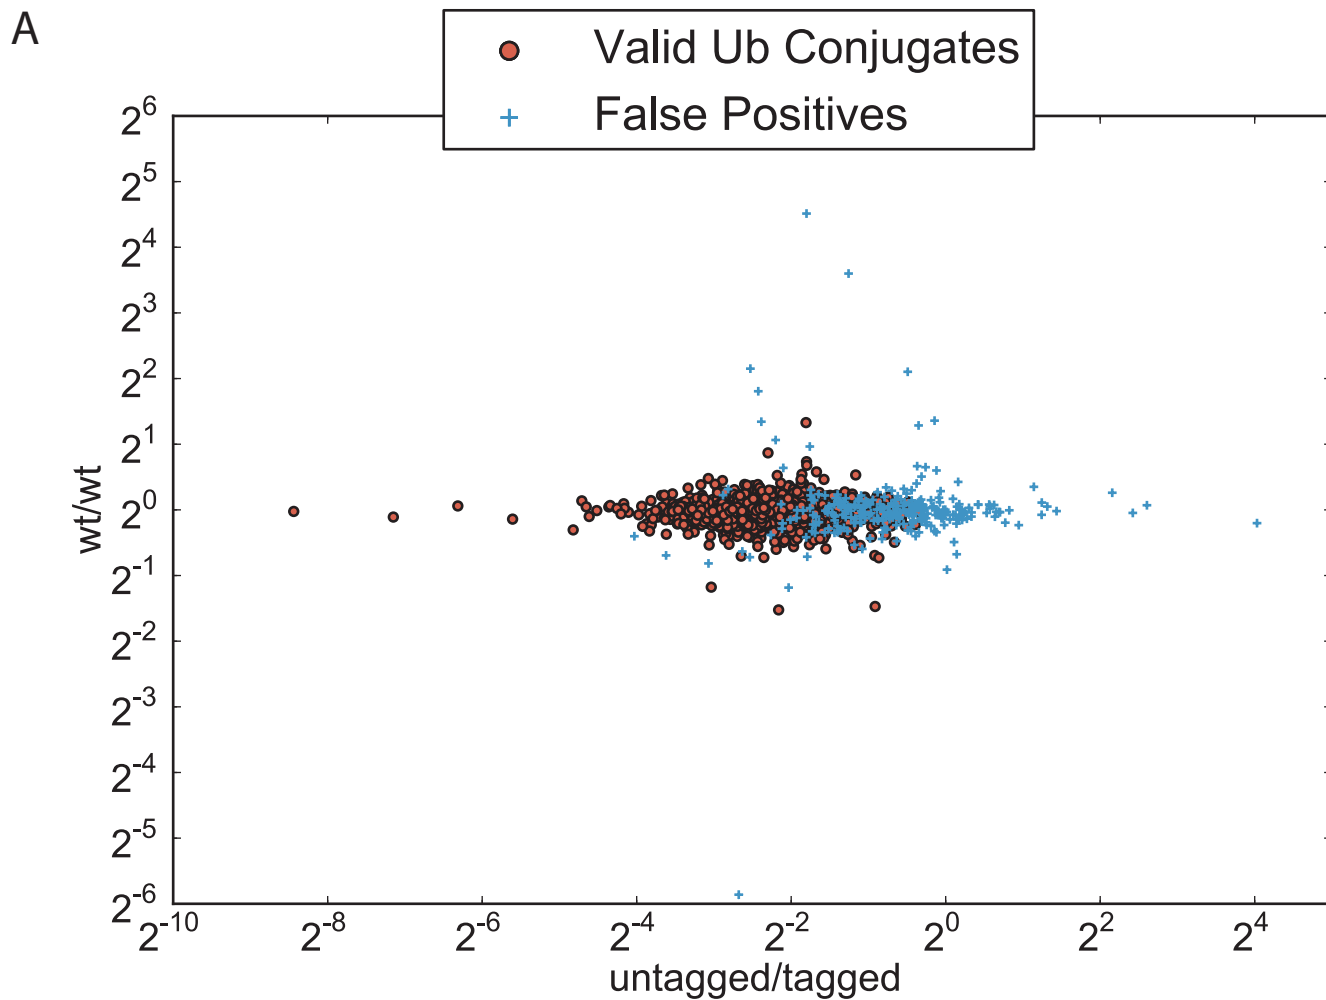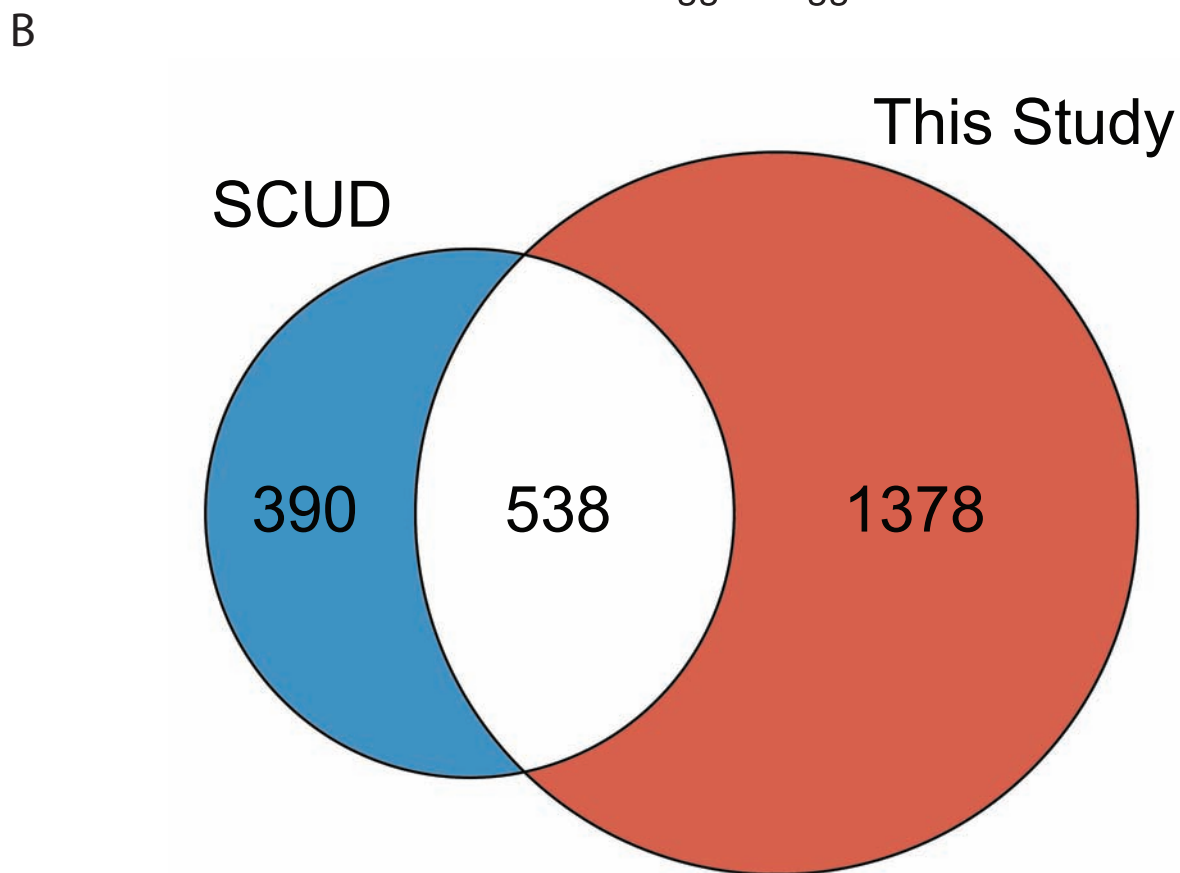

A

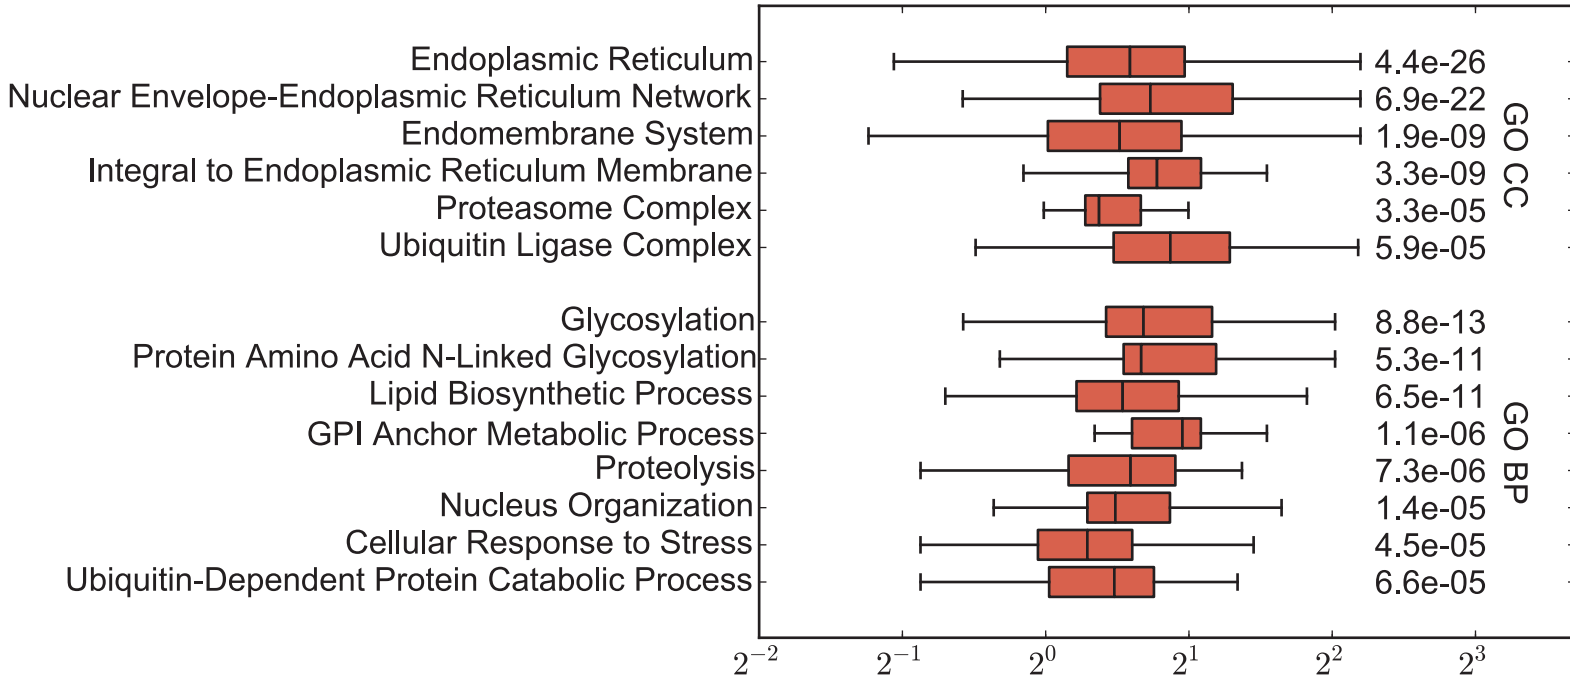

B

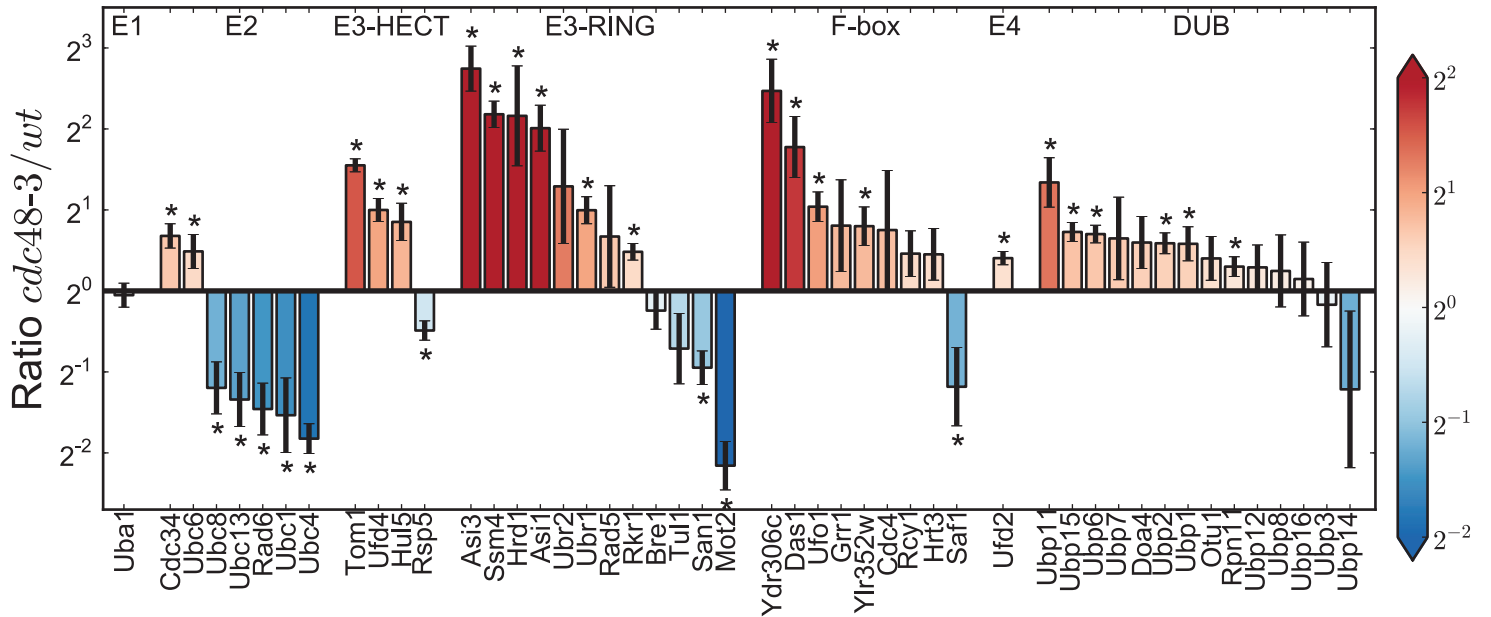

**A. *ubx3Δ***

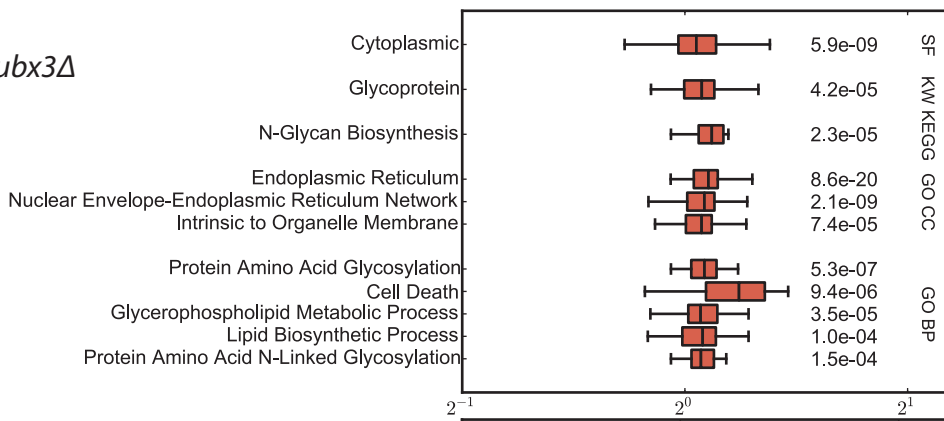

**B. *ubx4Δ***

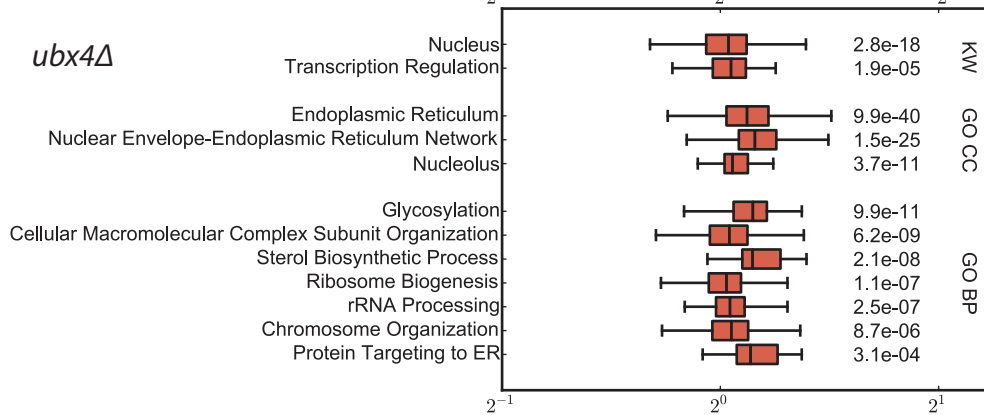

**C. *ubx5Δ***

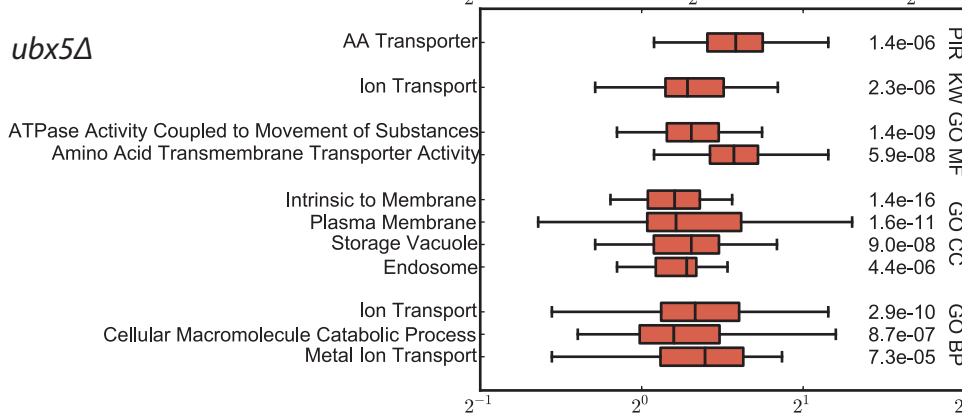

**D. *ubx6Δ***

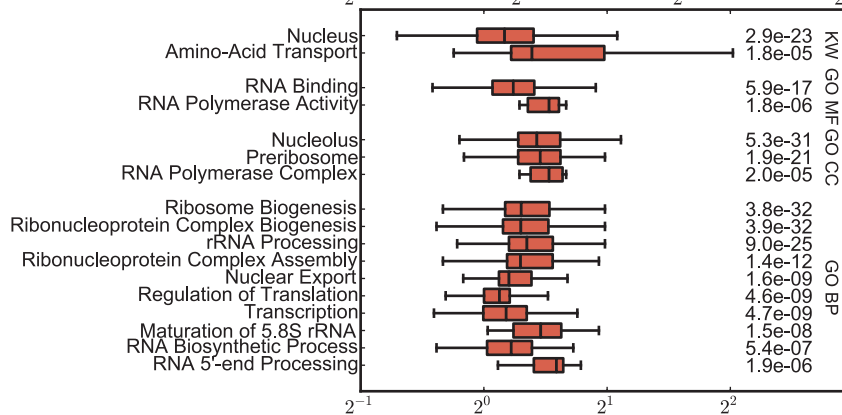

**E. *ubx7Δ***

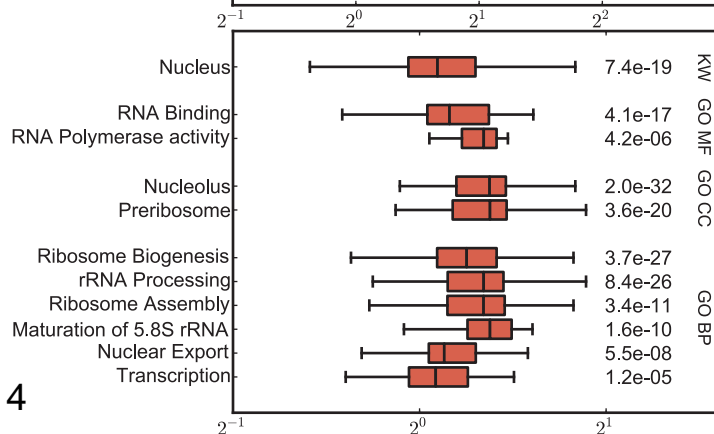

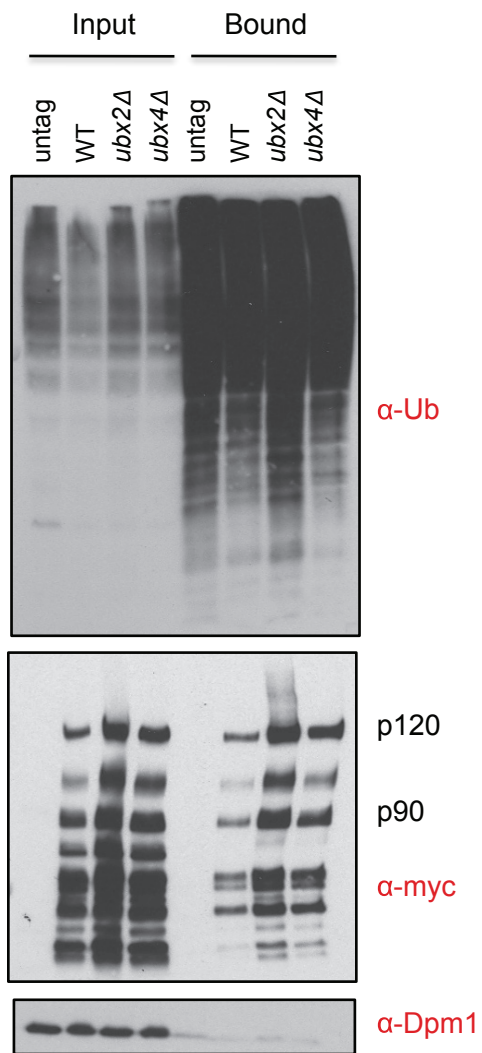

Supplement: supp_M113.030163_mcp.M113.030163-1.pdf [file supp_M113.030163_mcp.M113.030163-1.pdf]
