# Supplementary material
Source: PubMed Central journal article supplement (PMC3790291)

Scan number 7345 Raw file nak\_cdc48UbconjugatecontrolSAX4\_22may10\_13  
 Method ITMS; CID Pepti... 93.48

Protein Group 145

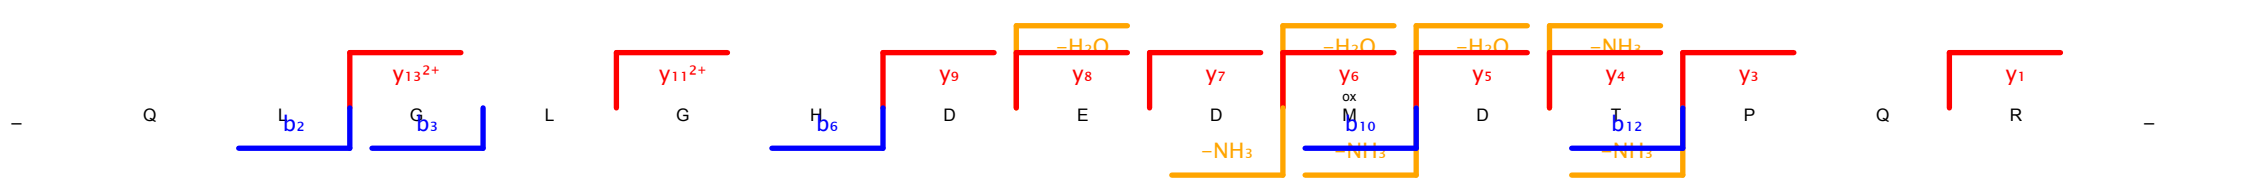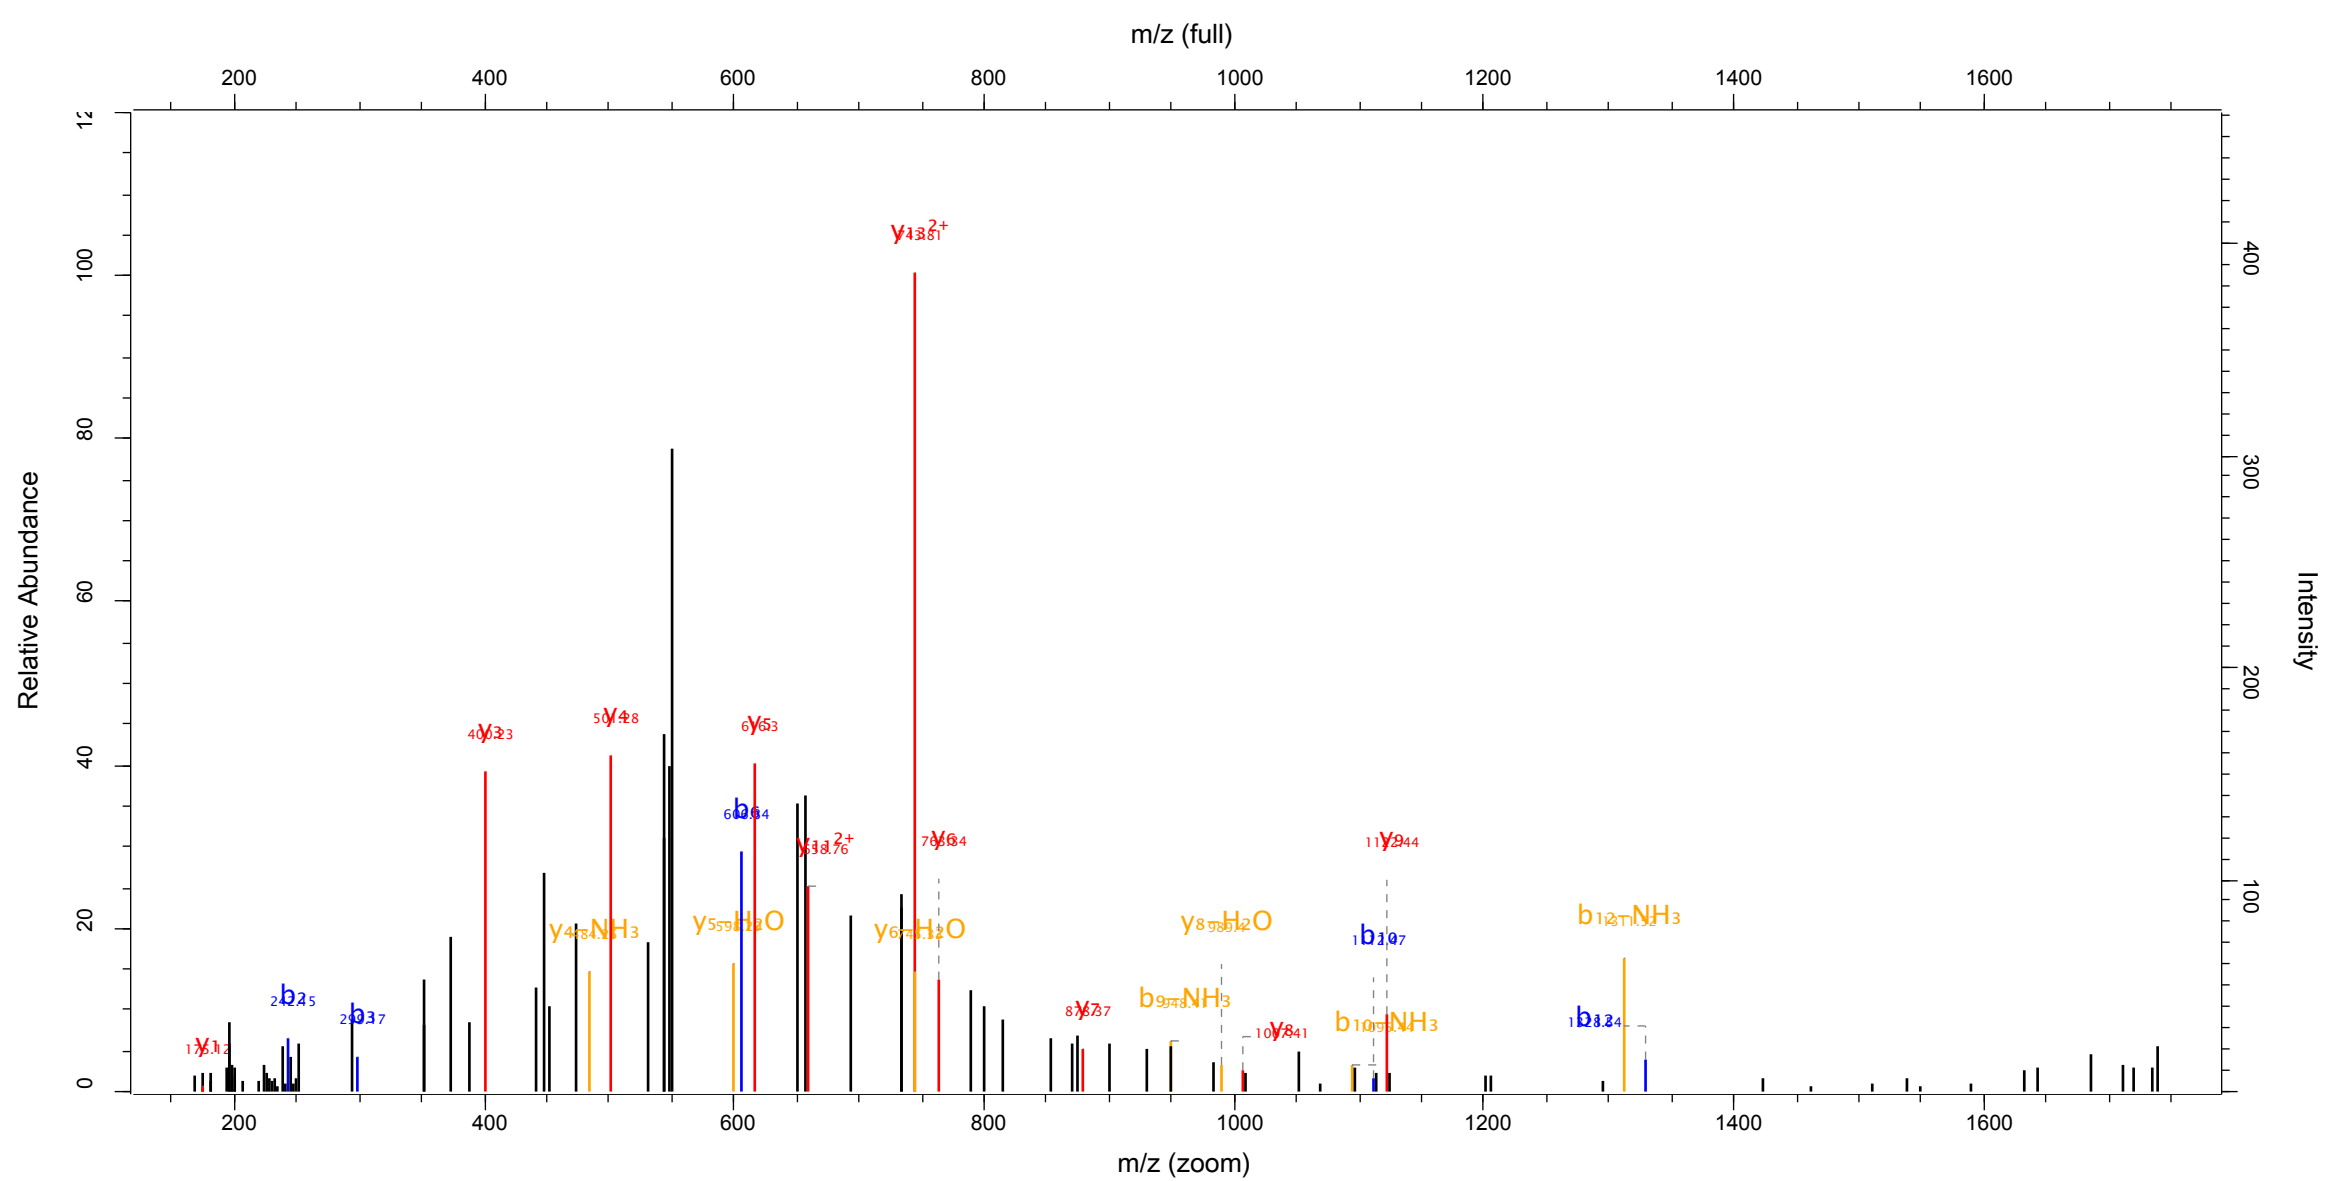

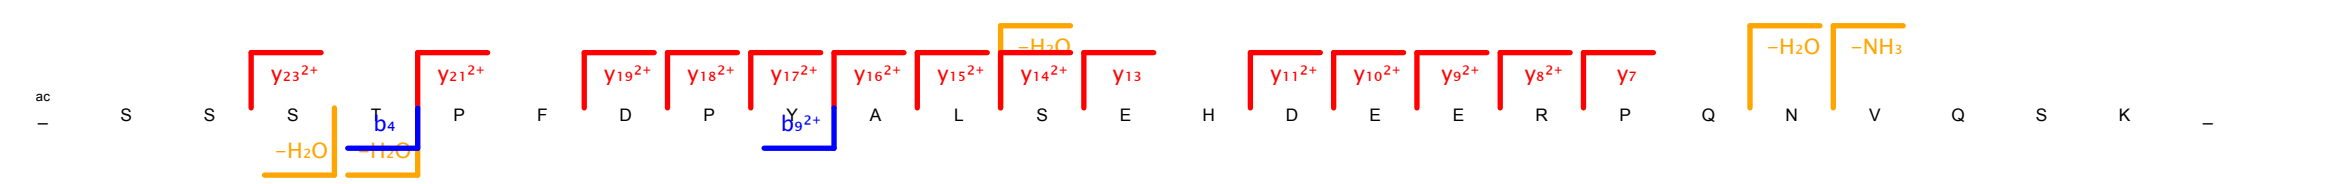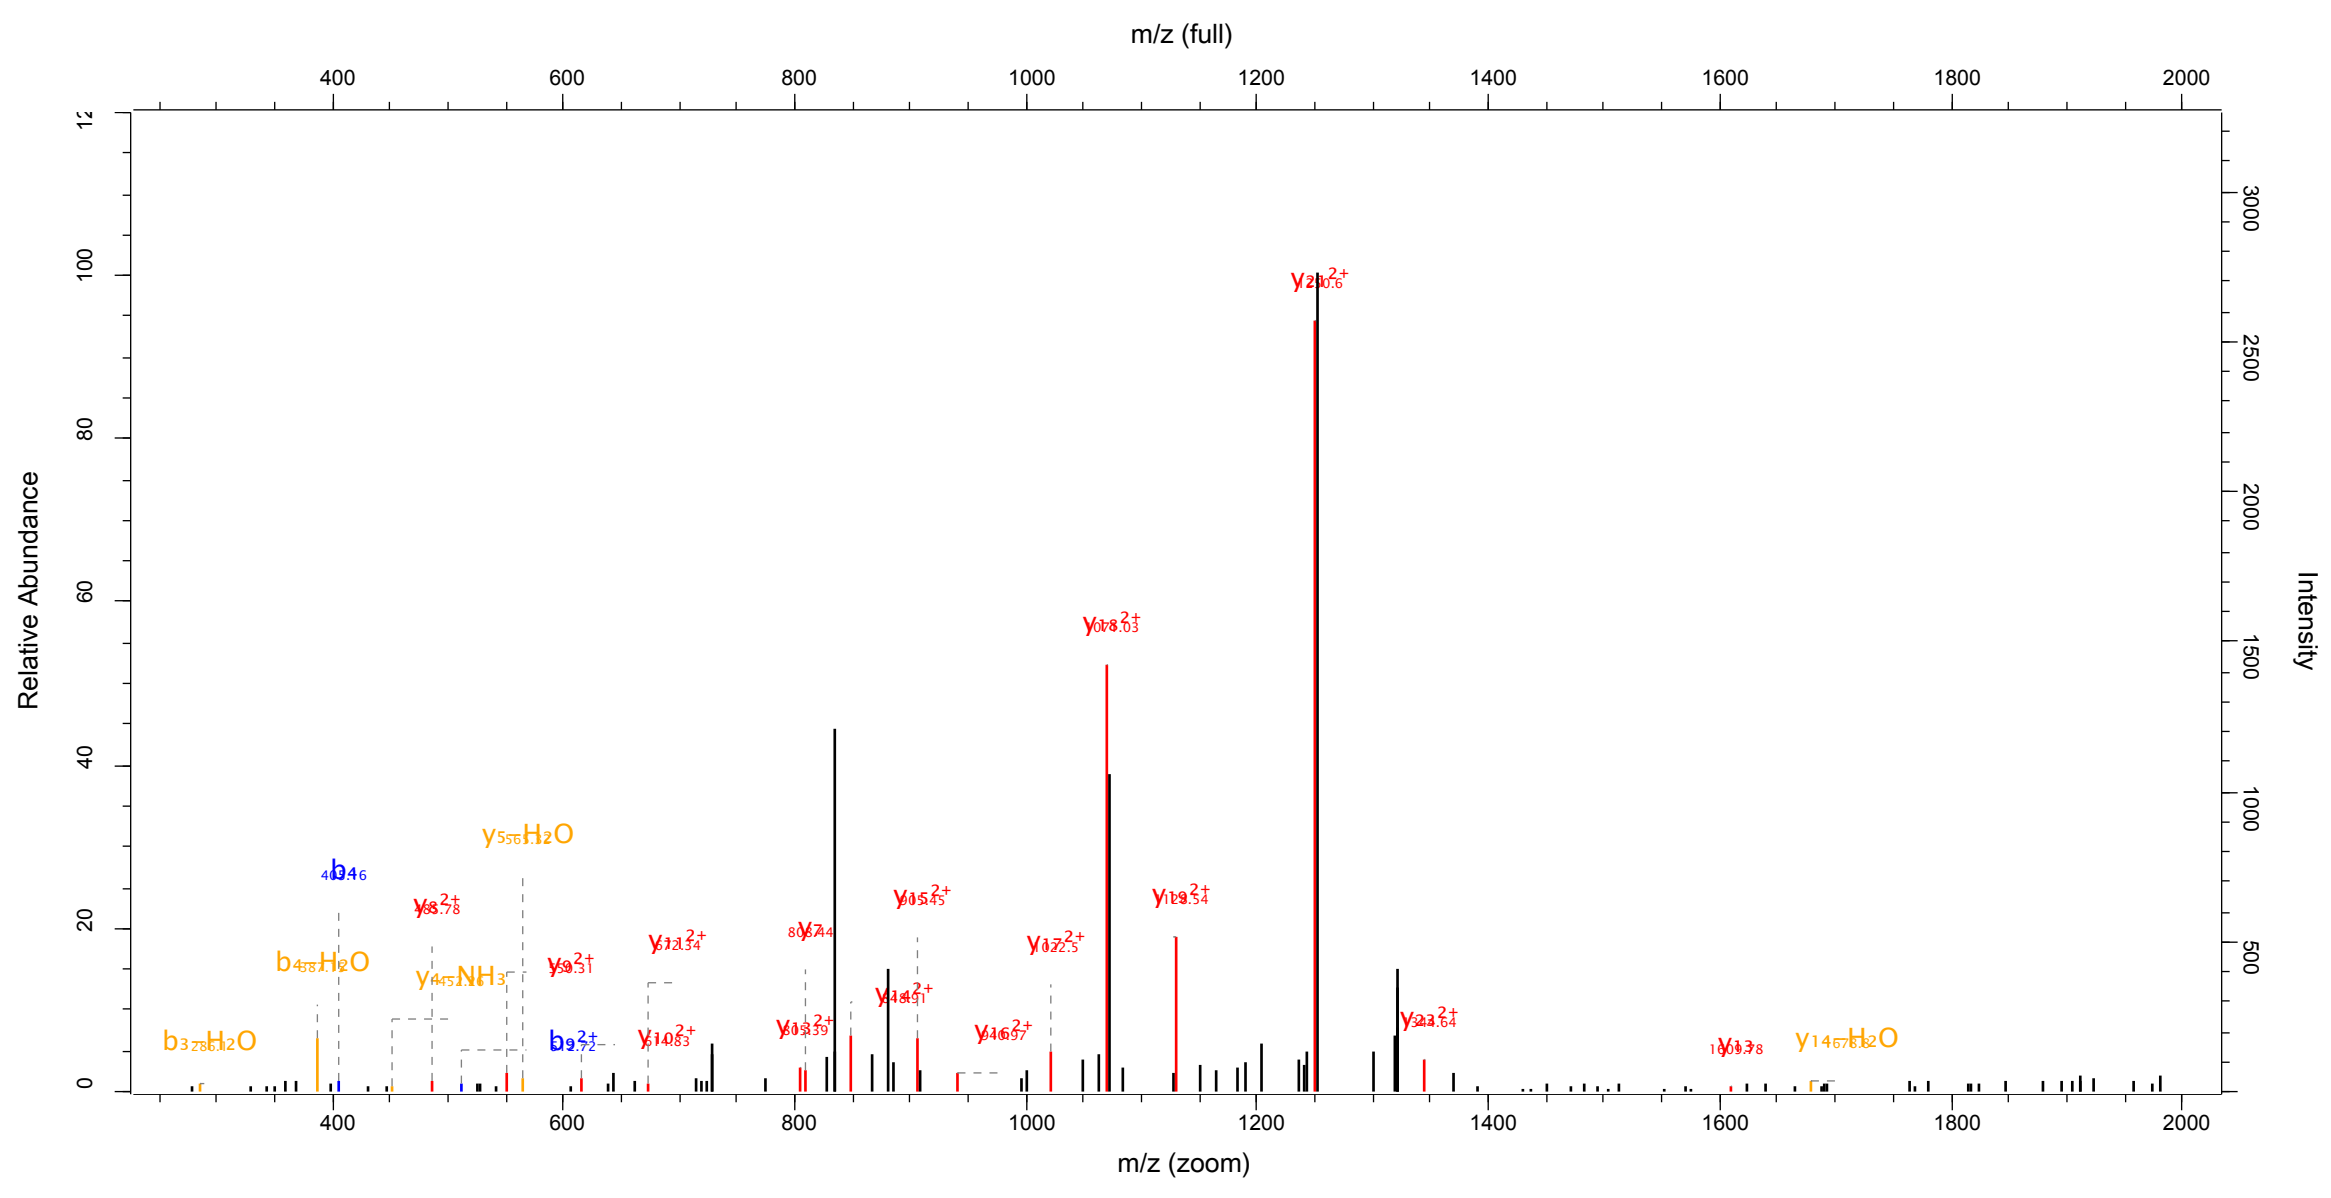

Scan number  
Method

12016  
ITMS; CID

Raw file  
Pepti...

nak\_UBX3LSAX3\_28jan11\_21  
162.72

Protein Group 161

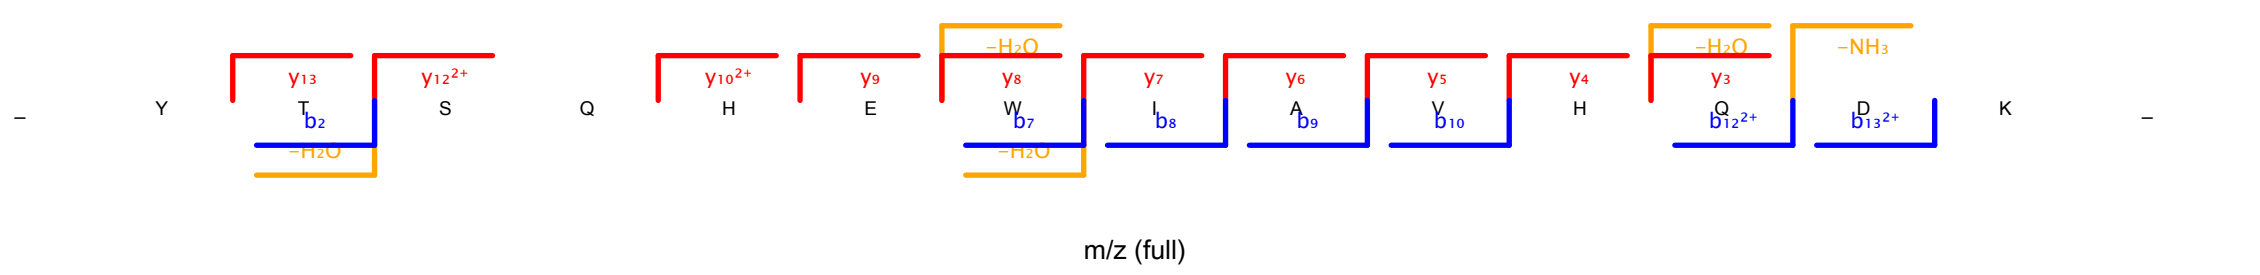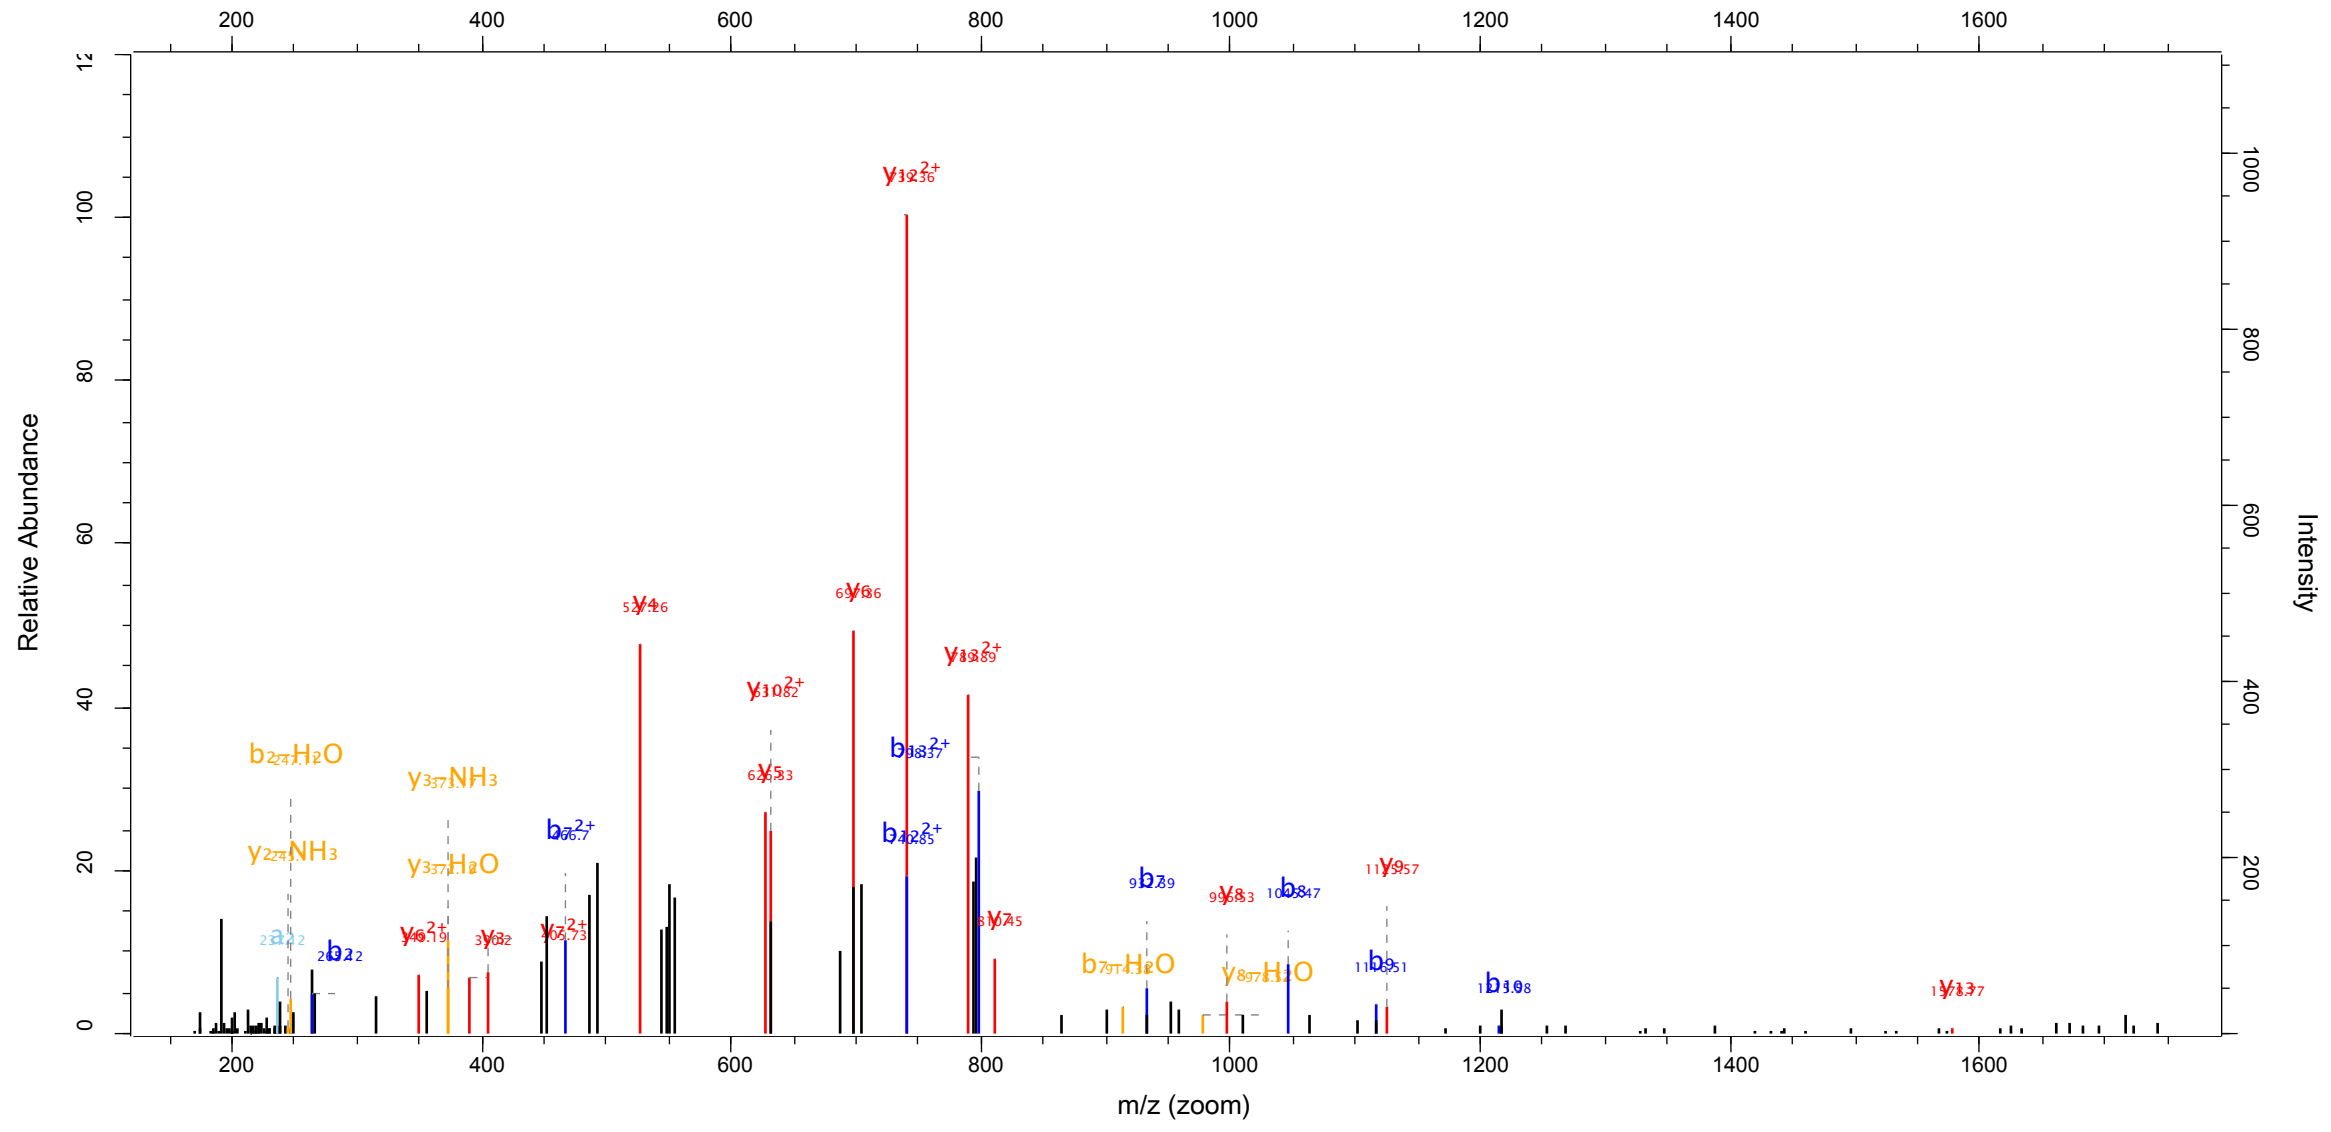

Scan number 29473 Raw file nak\_cdc48UbconjugatecontrolSAX2\_22may10\_11  
 Method ITMS; CID Pepti... 174.16

Protein Group 178

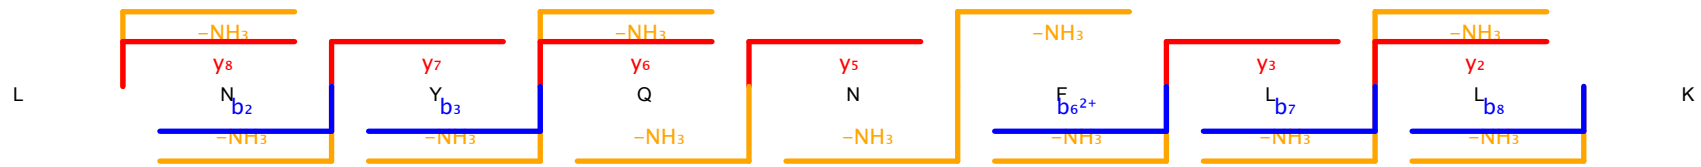

m/z (full)

200 300 400 500 600 700 800 900 1000 1100 1200

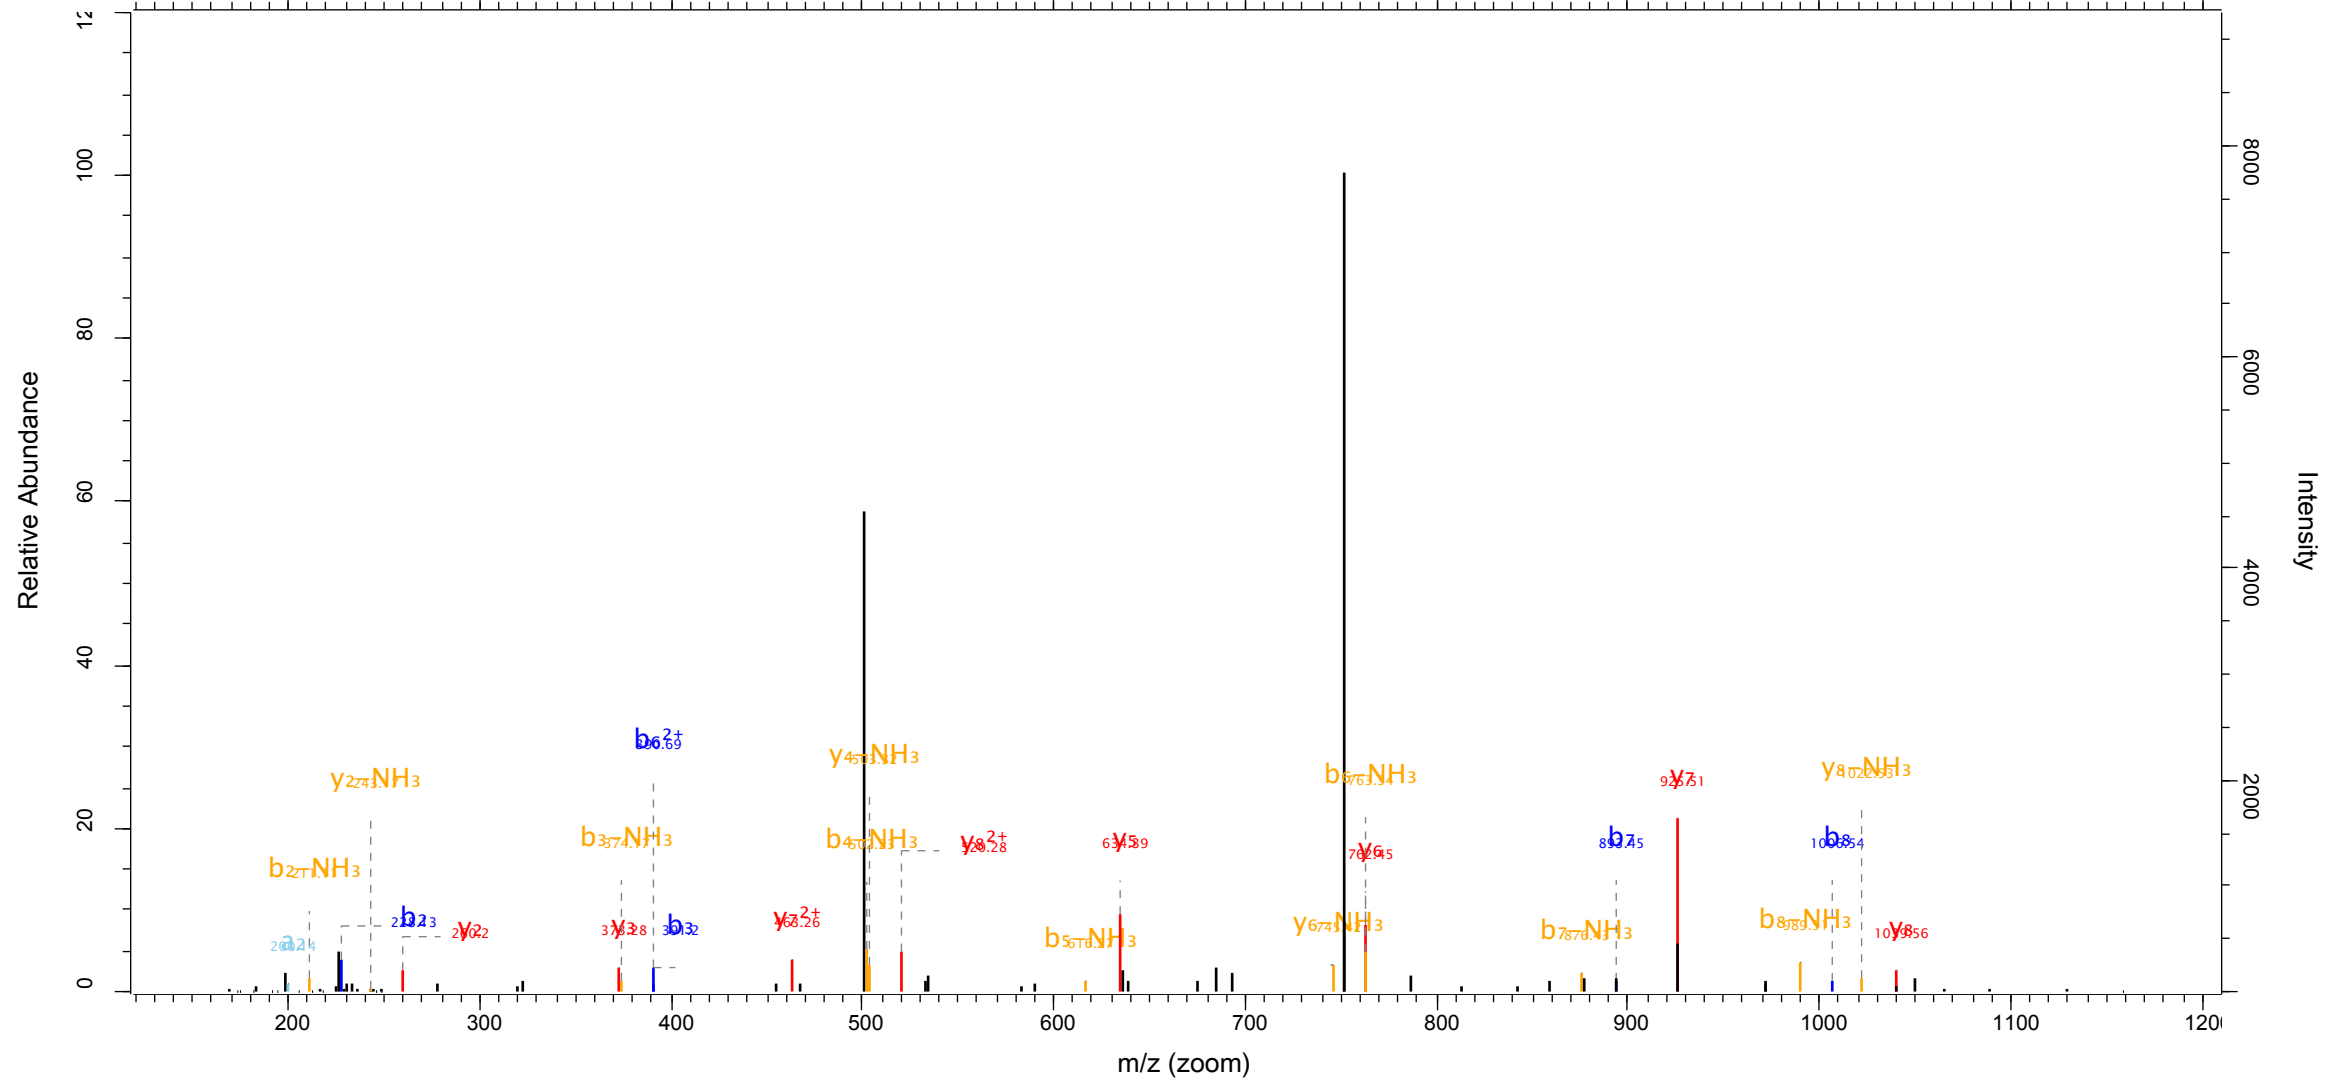

Scan number 27477 Raw file nak\_cdc48UbconjugatesSAX4\_21may15  
Method ITMS; CID Pepti... 141.95

Protein Group 322

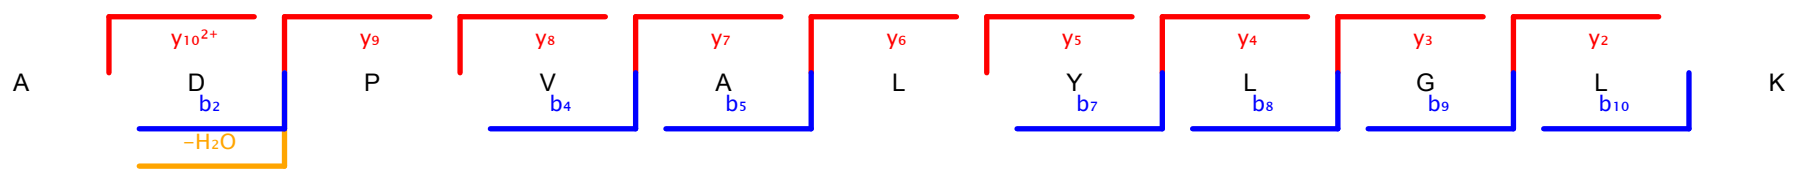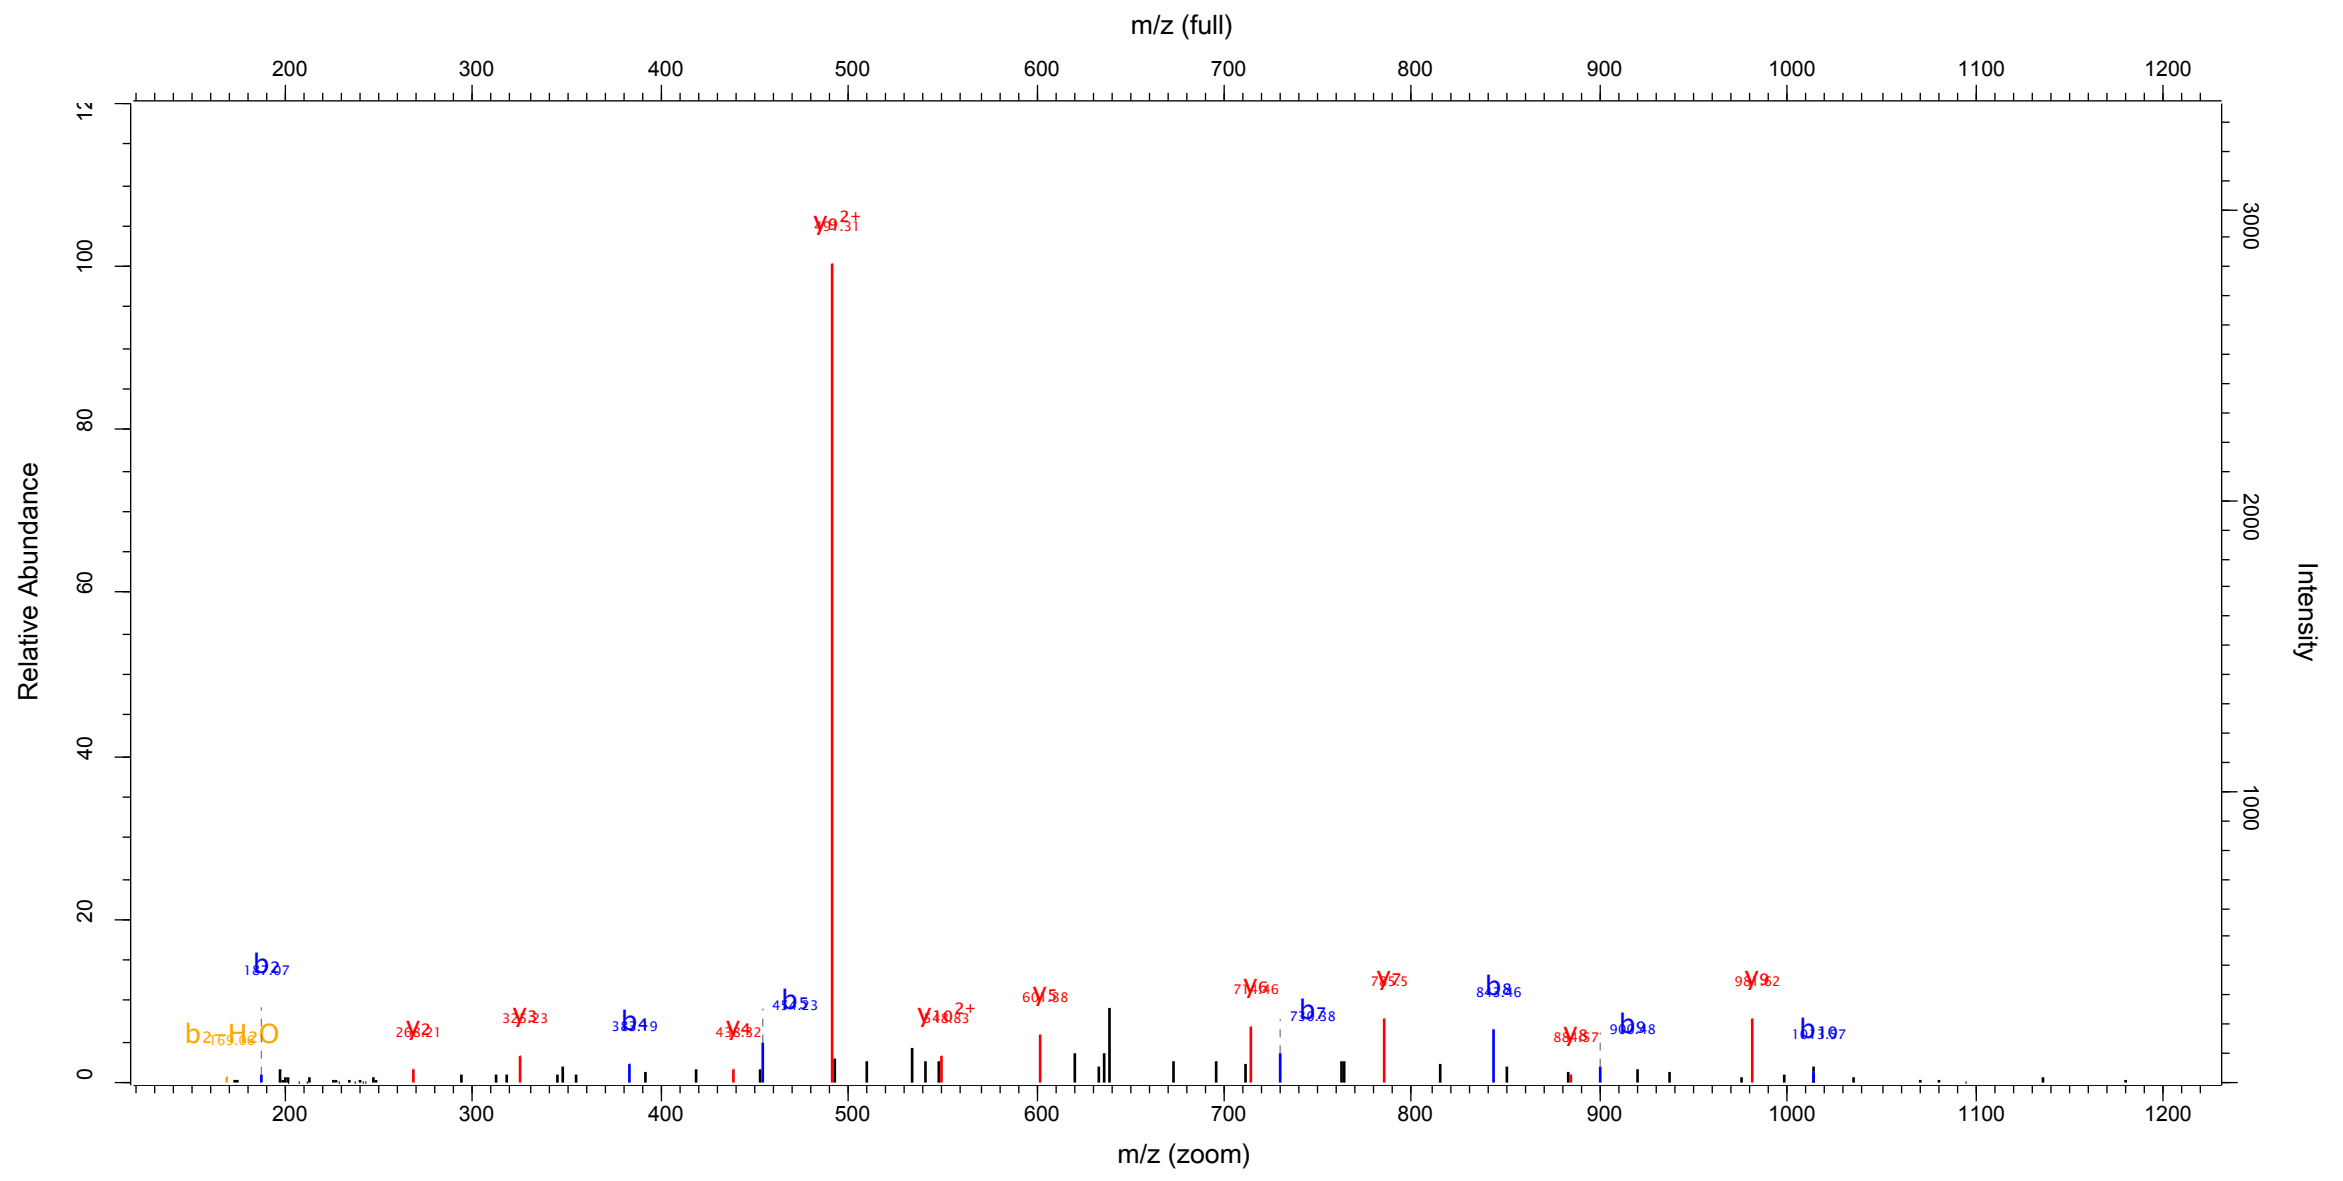

Scan number 14962 Raw file nak\_cdc48UbconjugatesSAX5\_14may10\_09  
 Method ITMS; CID Pepti... 198.85

Protein Group 344

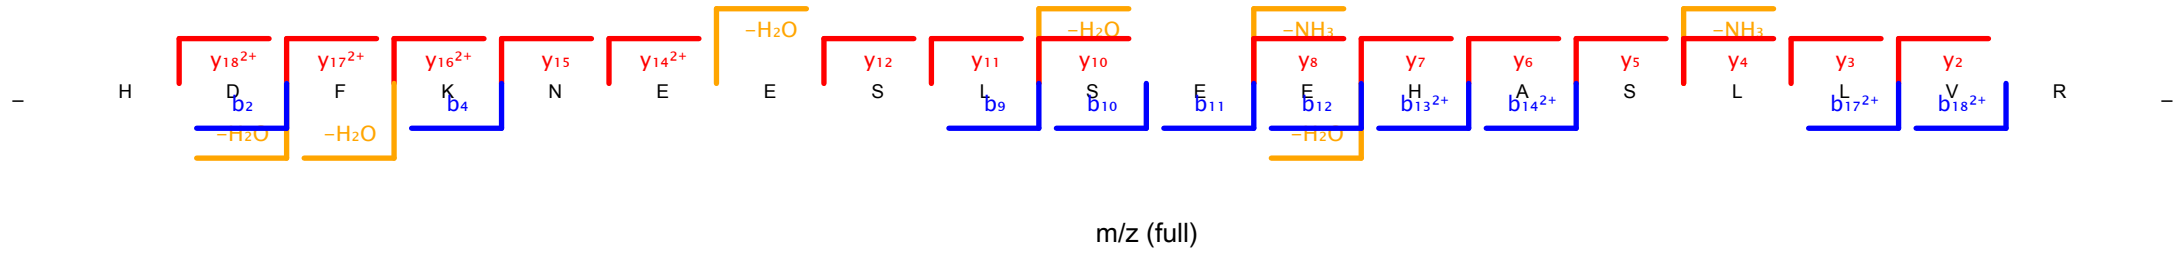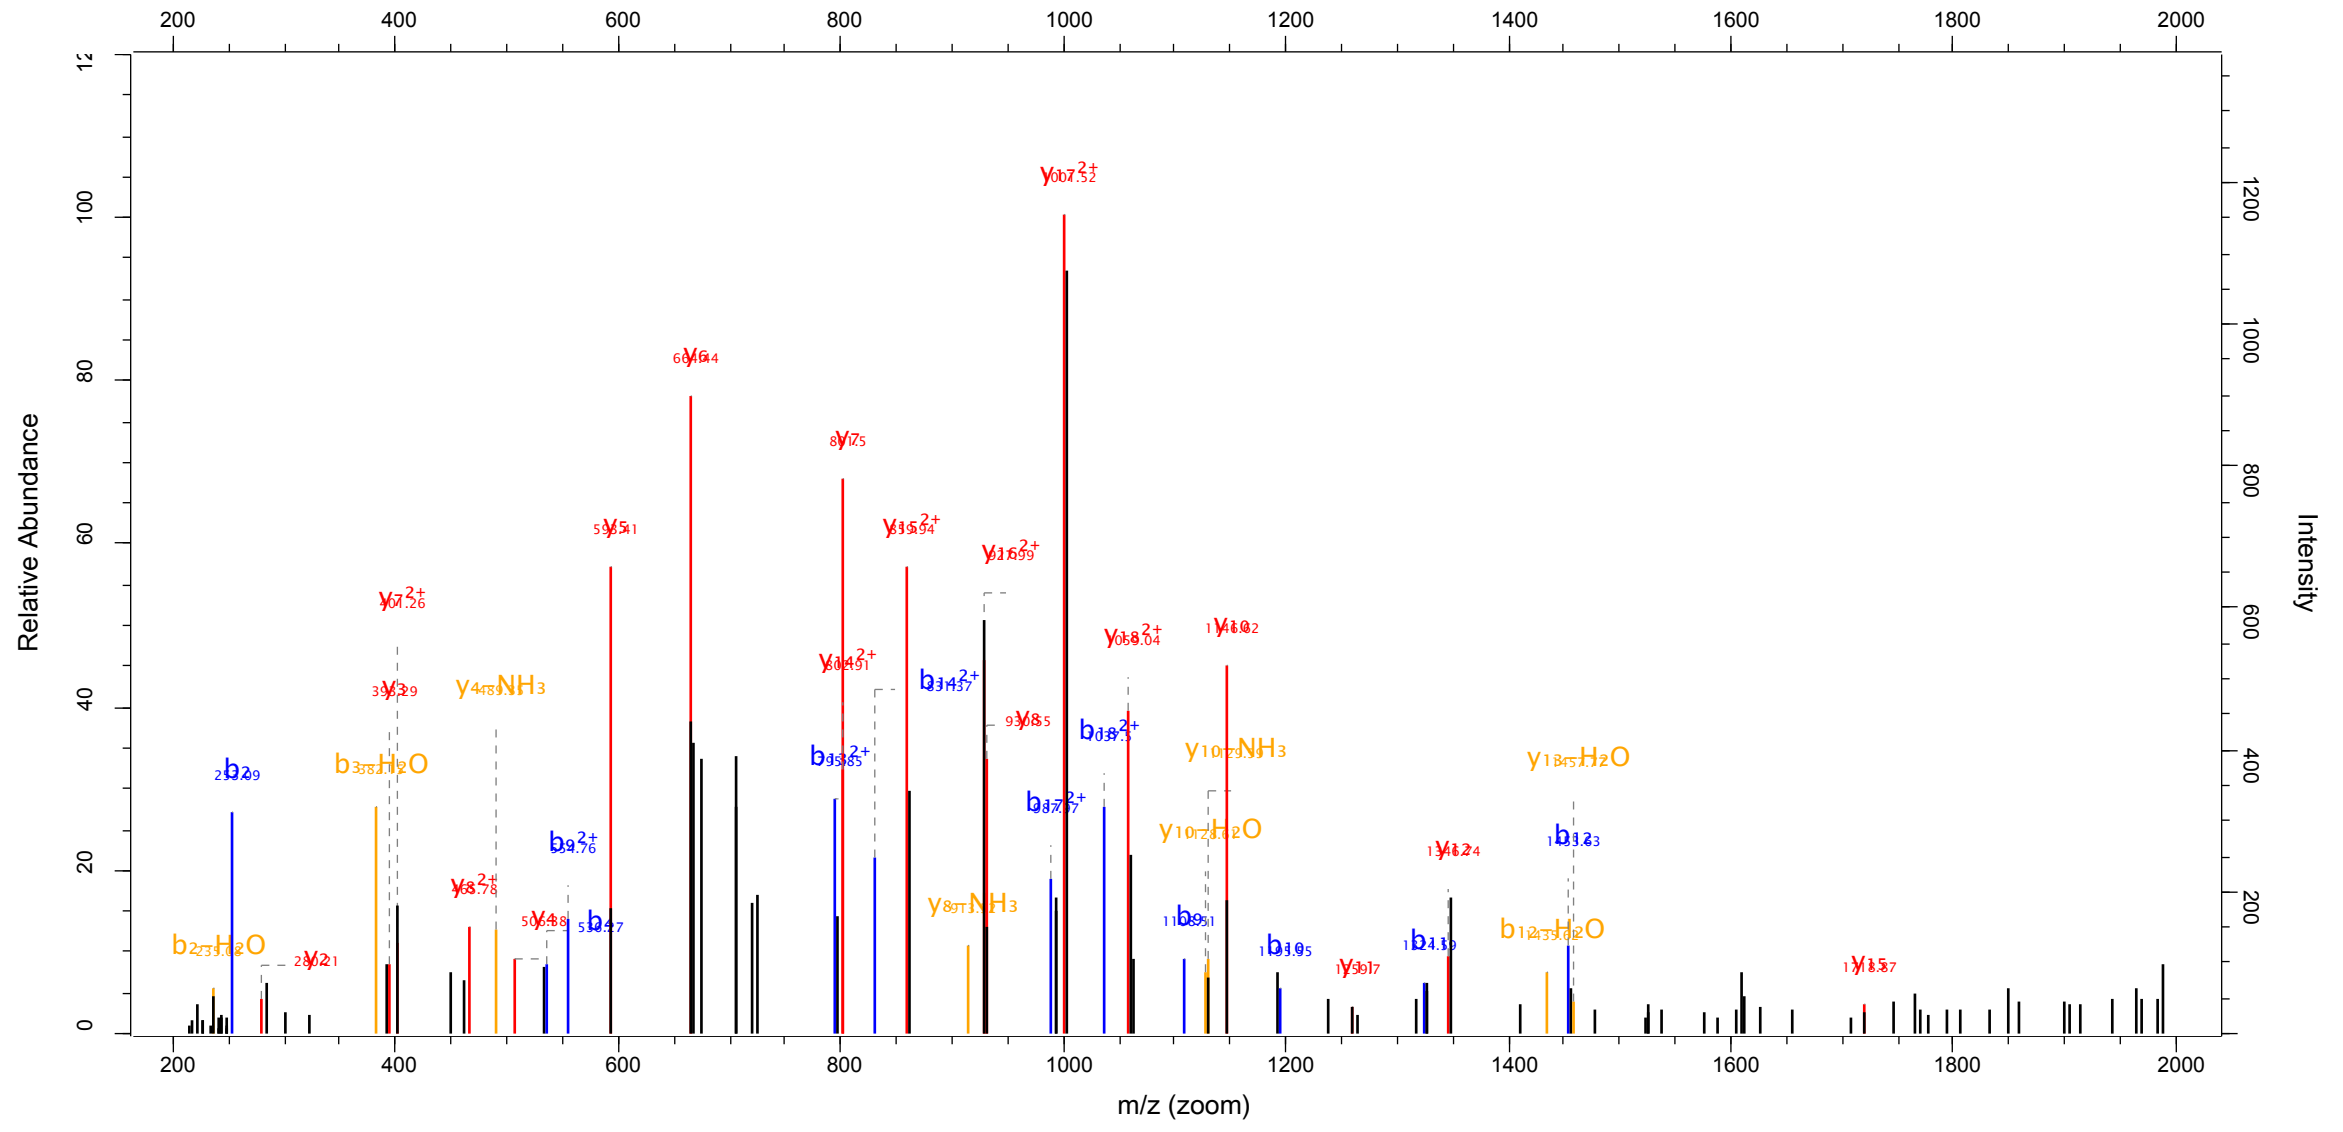

Scan number  
Method

27946  
ITMS; CID

Raw file  
Pepti...

nak\_UBX2LSAX3\_8feb11\_03  
81.62

Protein Group 354

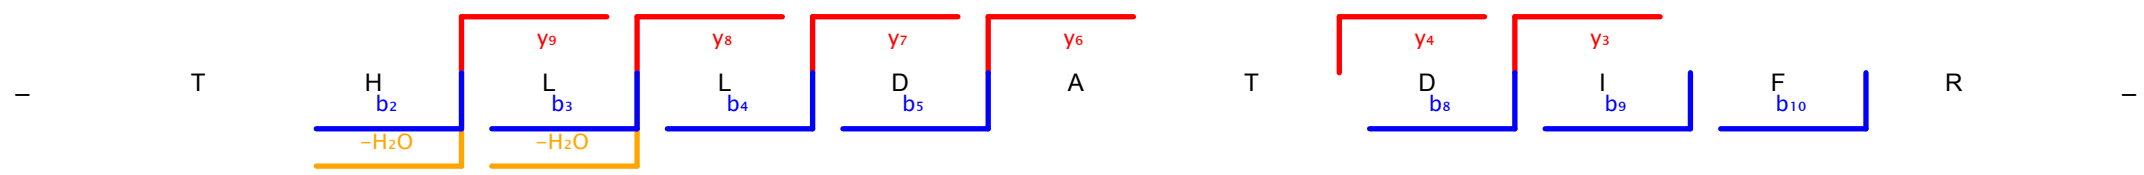

m/z (full)

200 300 400 500 600 700 800 900 1000 1100 1200 1300

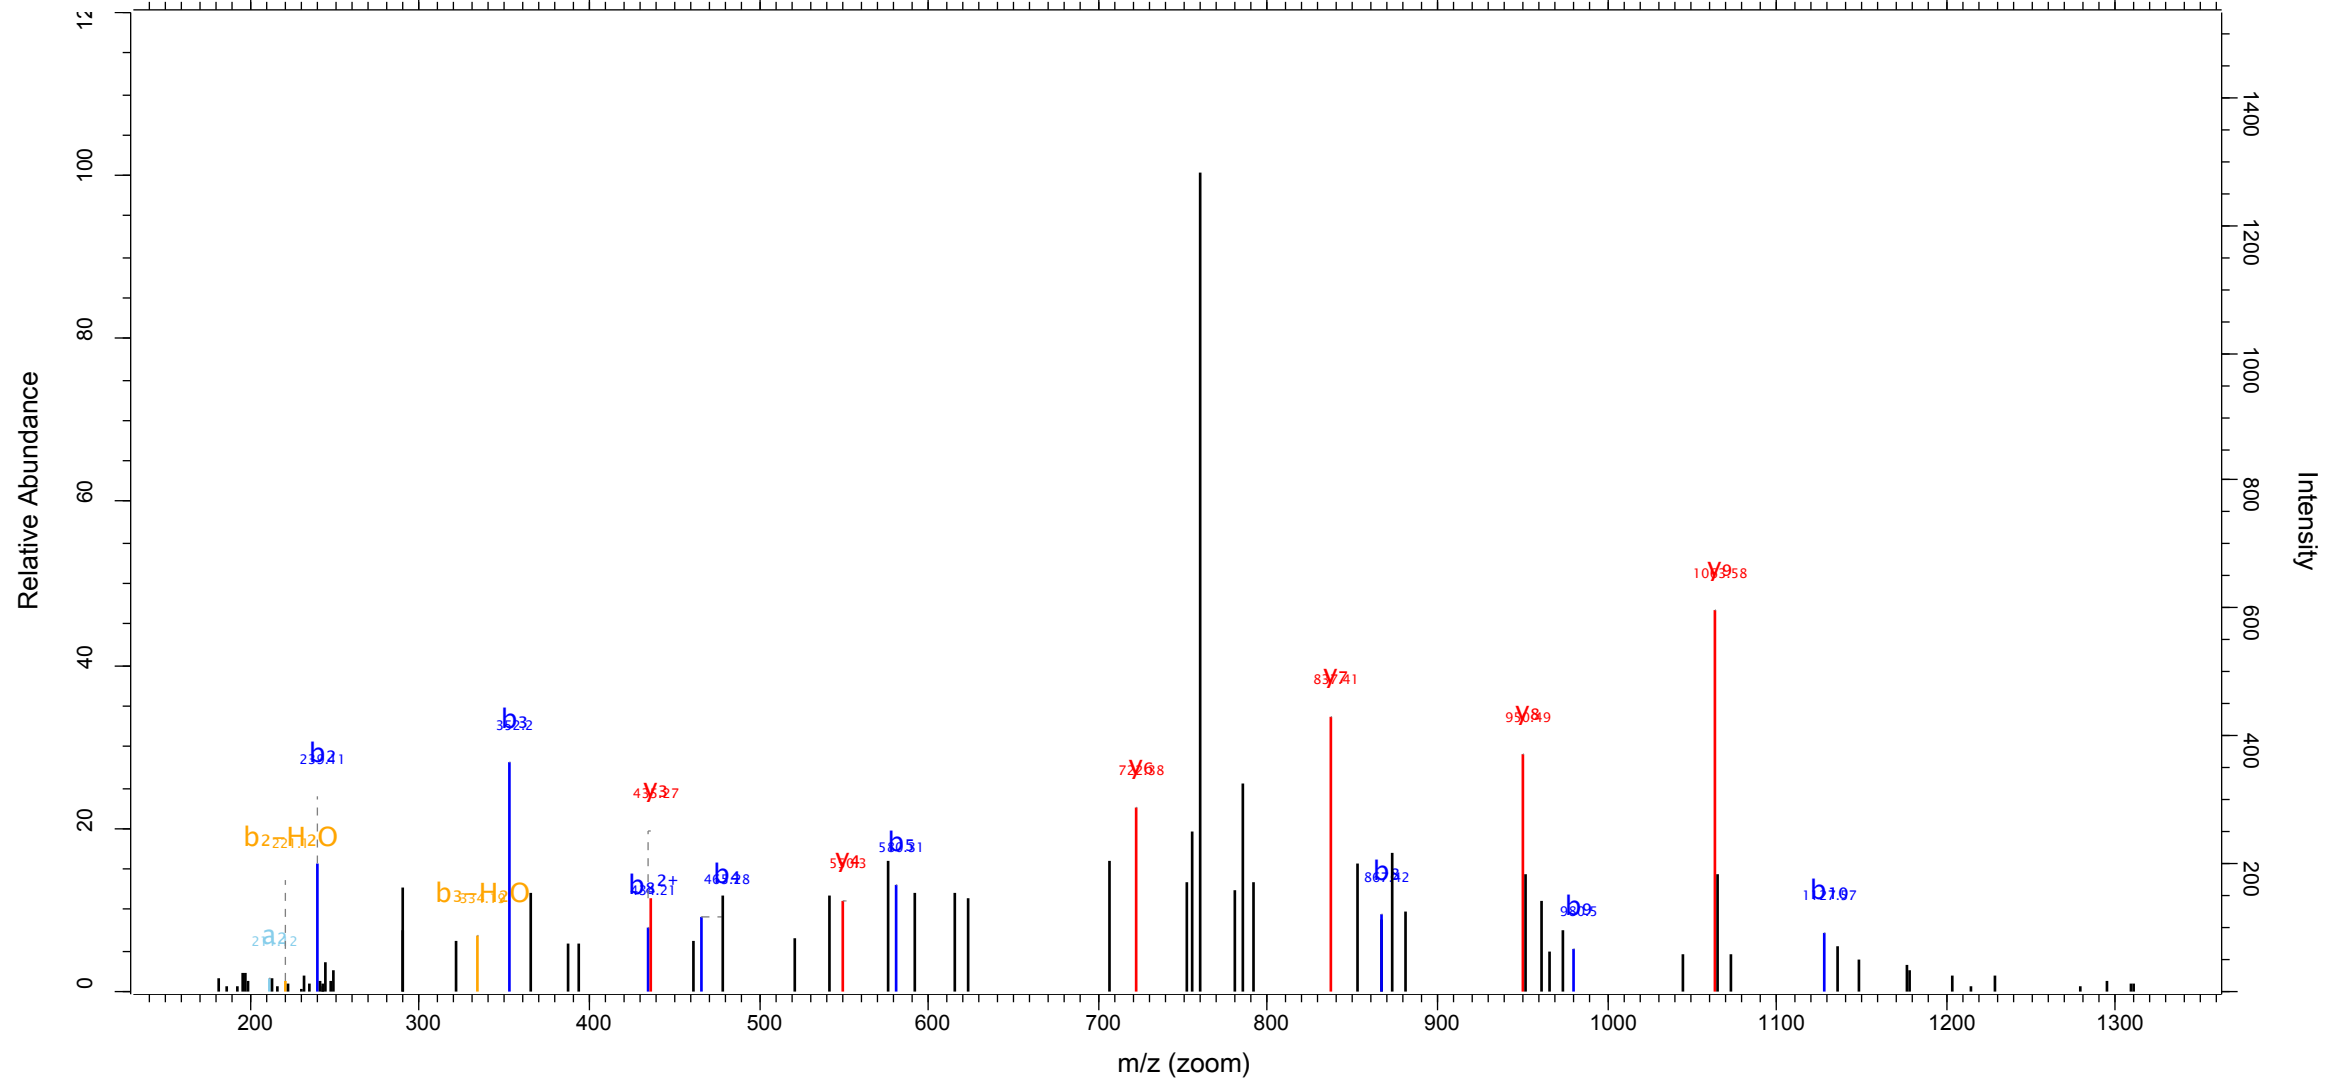

Scan number 17180 Raw file nak\_cdc48UbconjugatesSAX5\_22may10\_6  
 Method ITMS; CID Pepti... 169.4

Protein Group 361

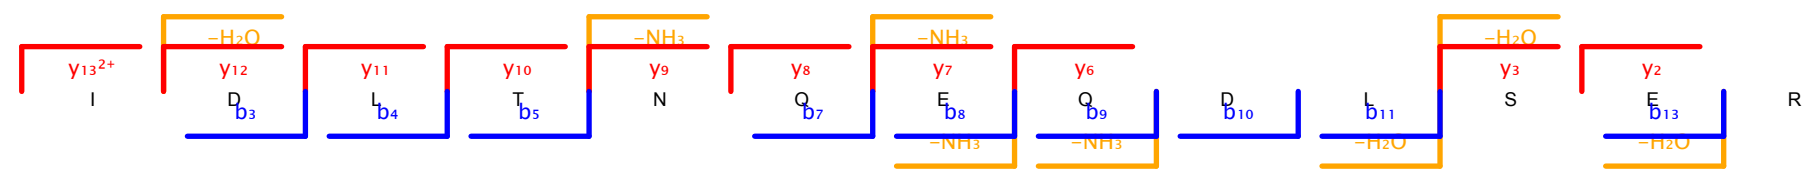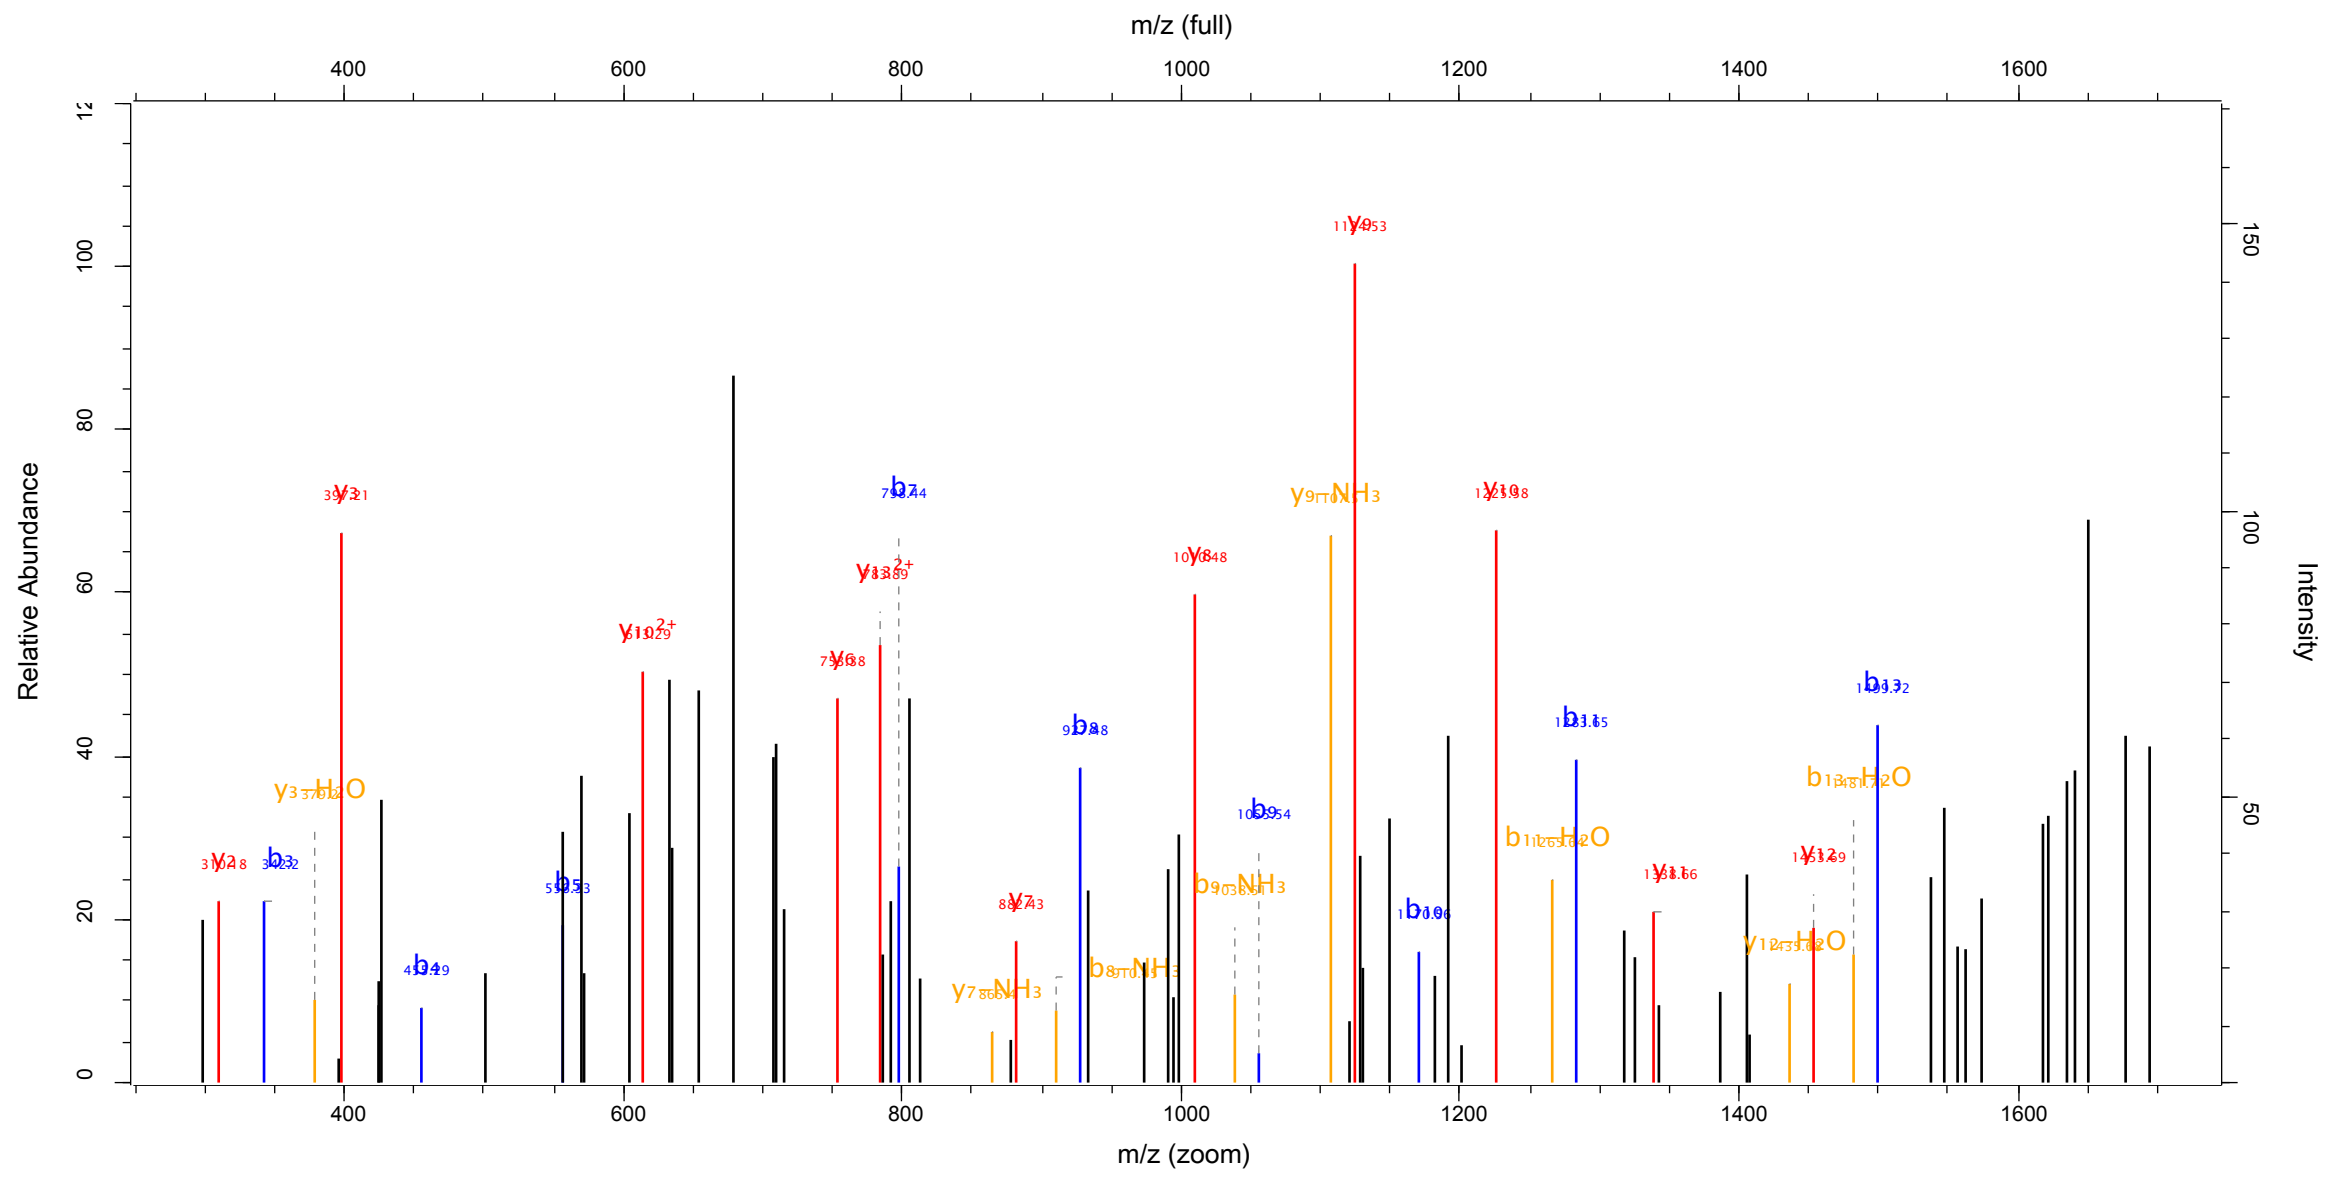



Scan number  
Method

20646  
ITMS; CID

Raw file  
Pepti...

nak\_UBX7LSAX4\_20Jan11\_4  
107.53

Protein Group 374

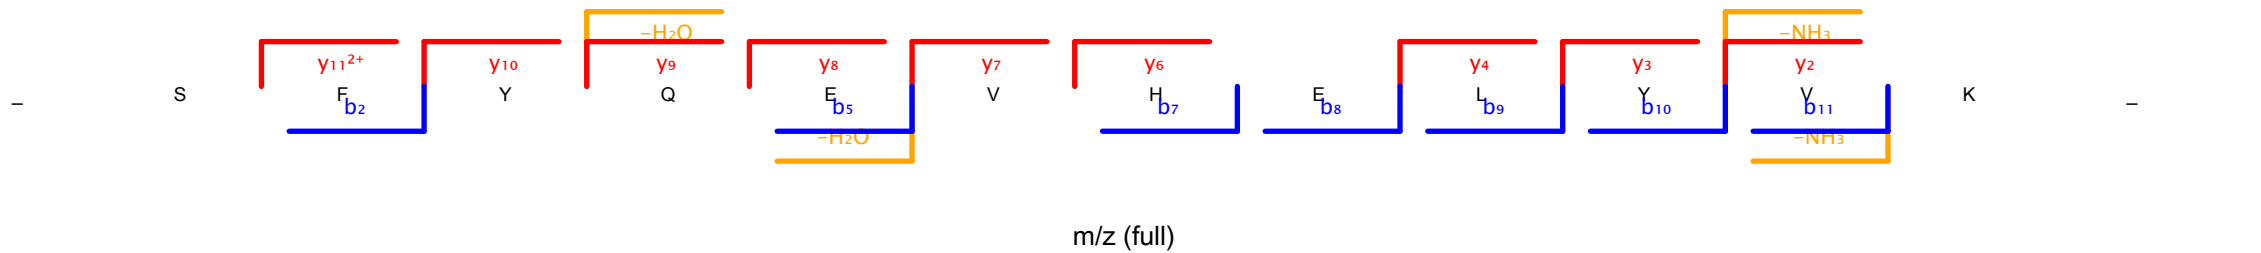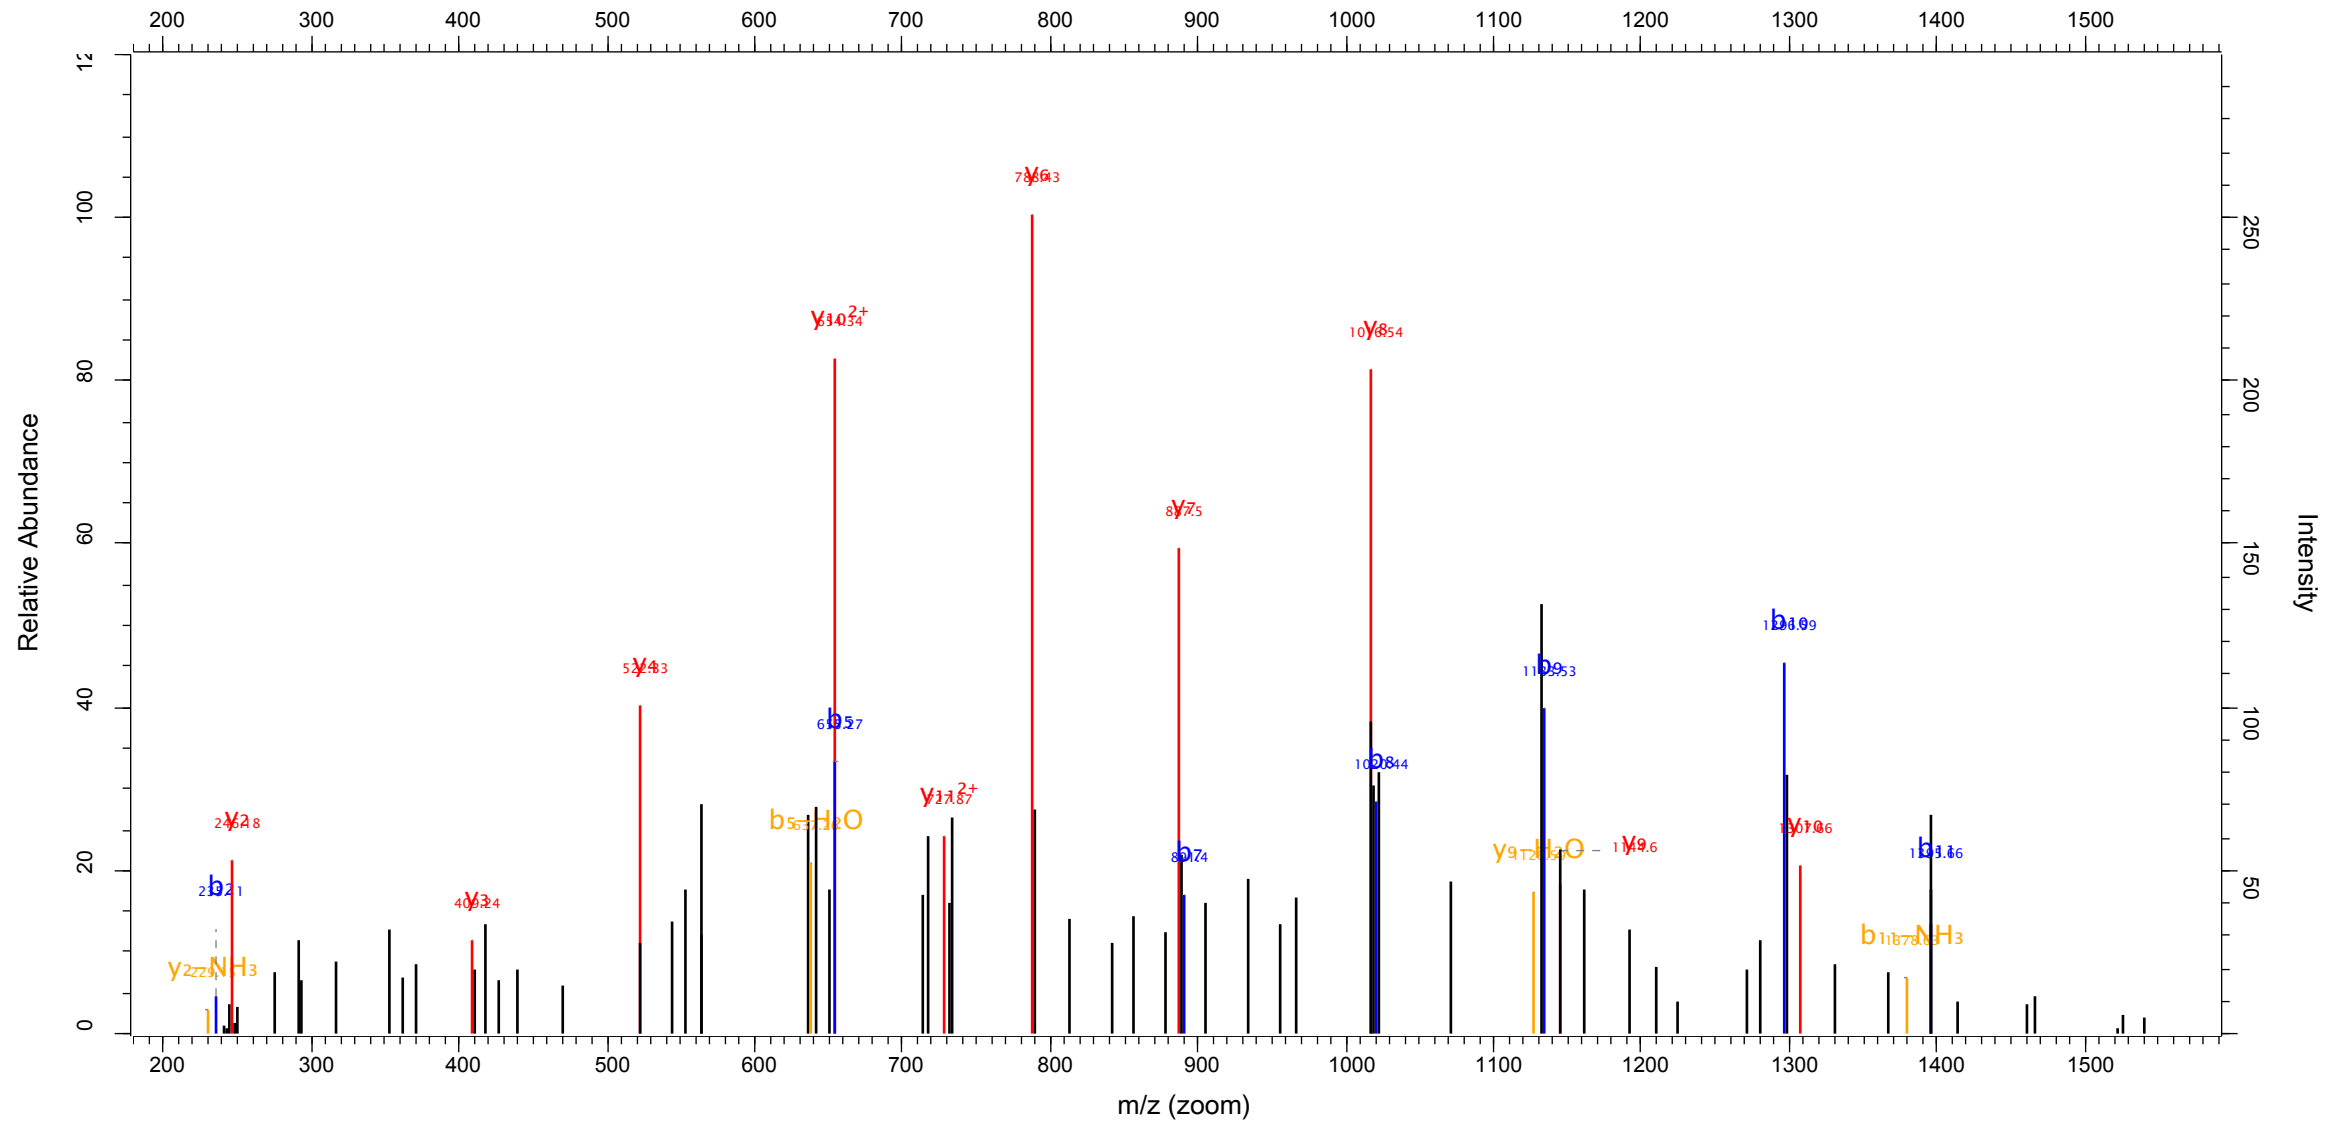

Scan number  
Method

11241  
ITMS; CID

Raw file  
Pepti...

nak\_UBX2LSAX1\_8feb11\_01  
130.41

Protein Group 399

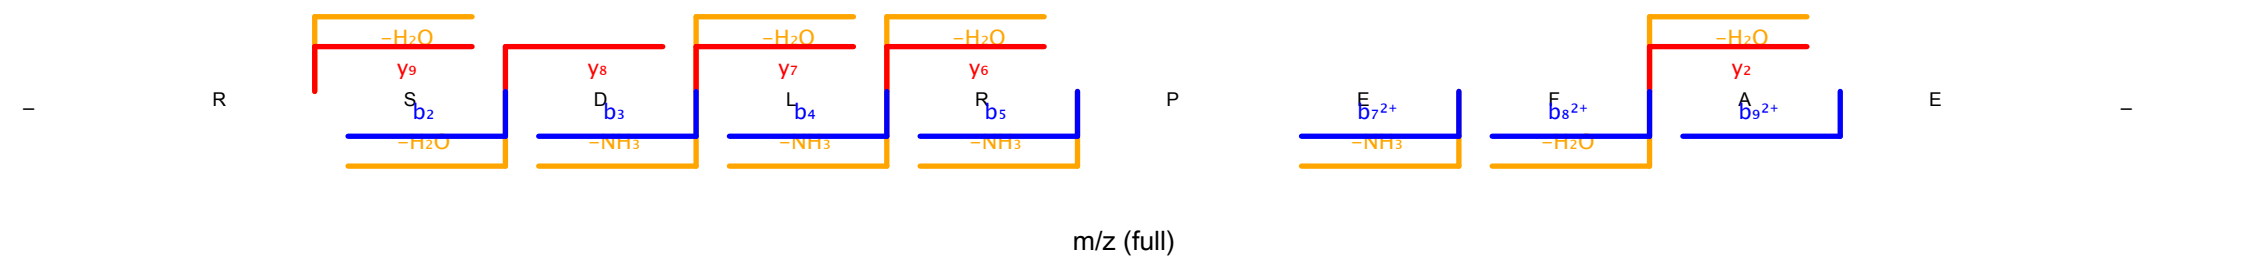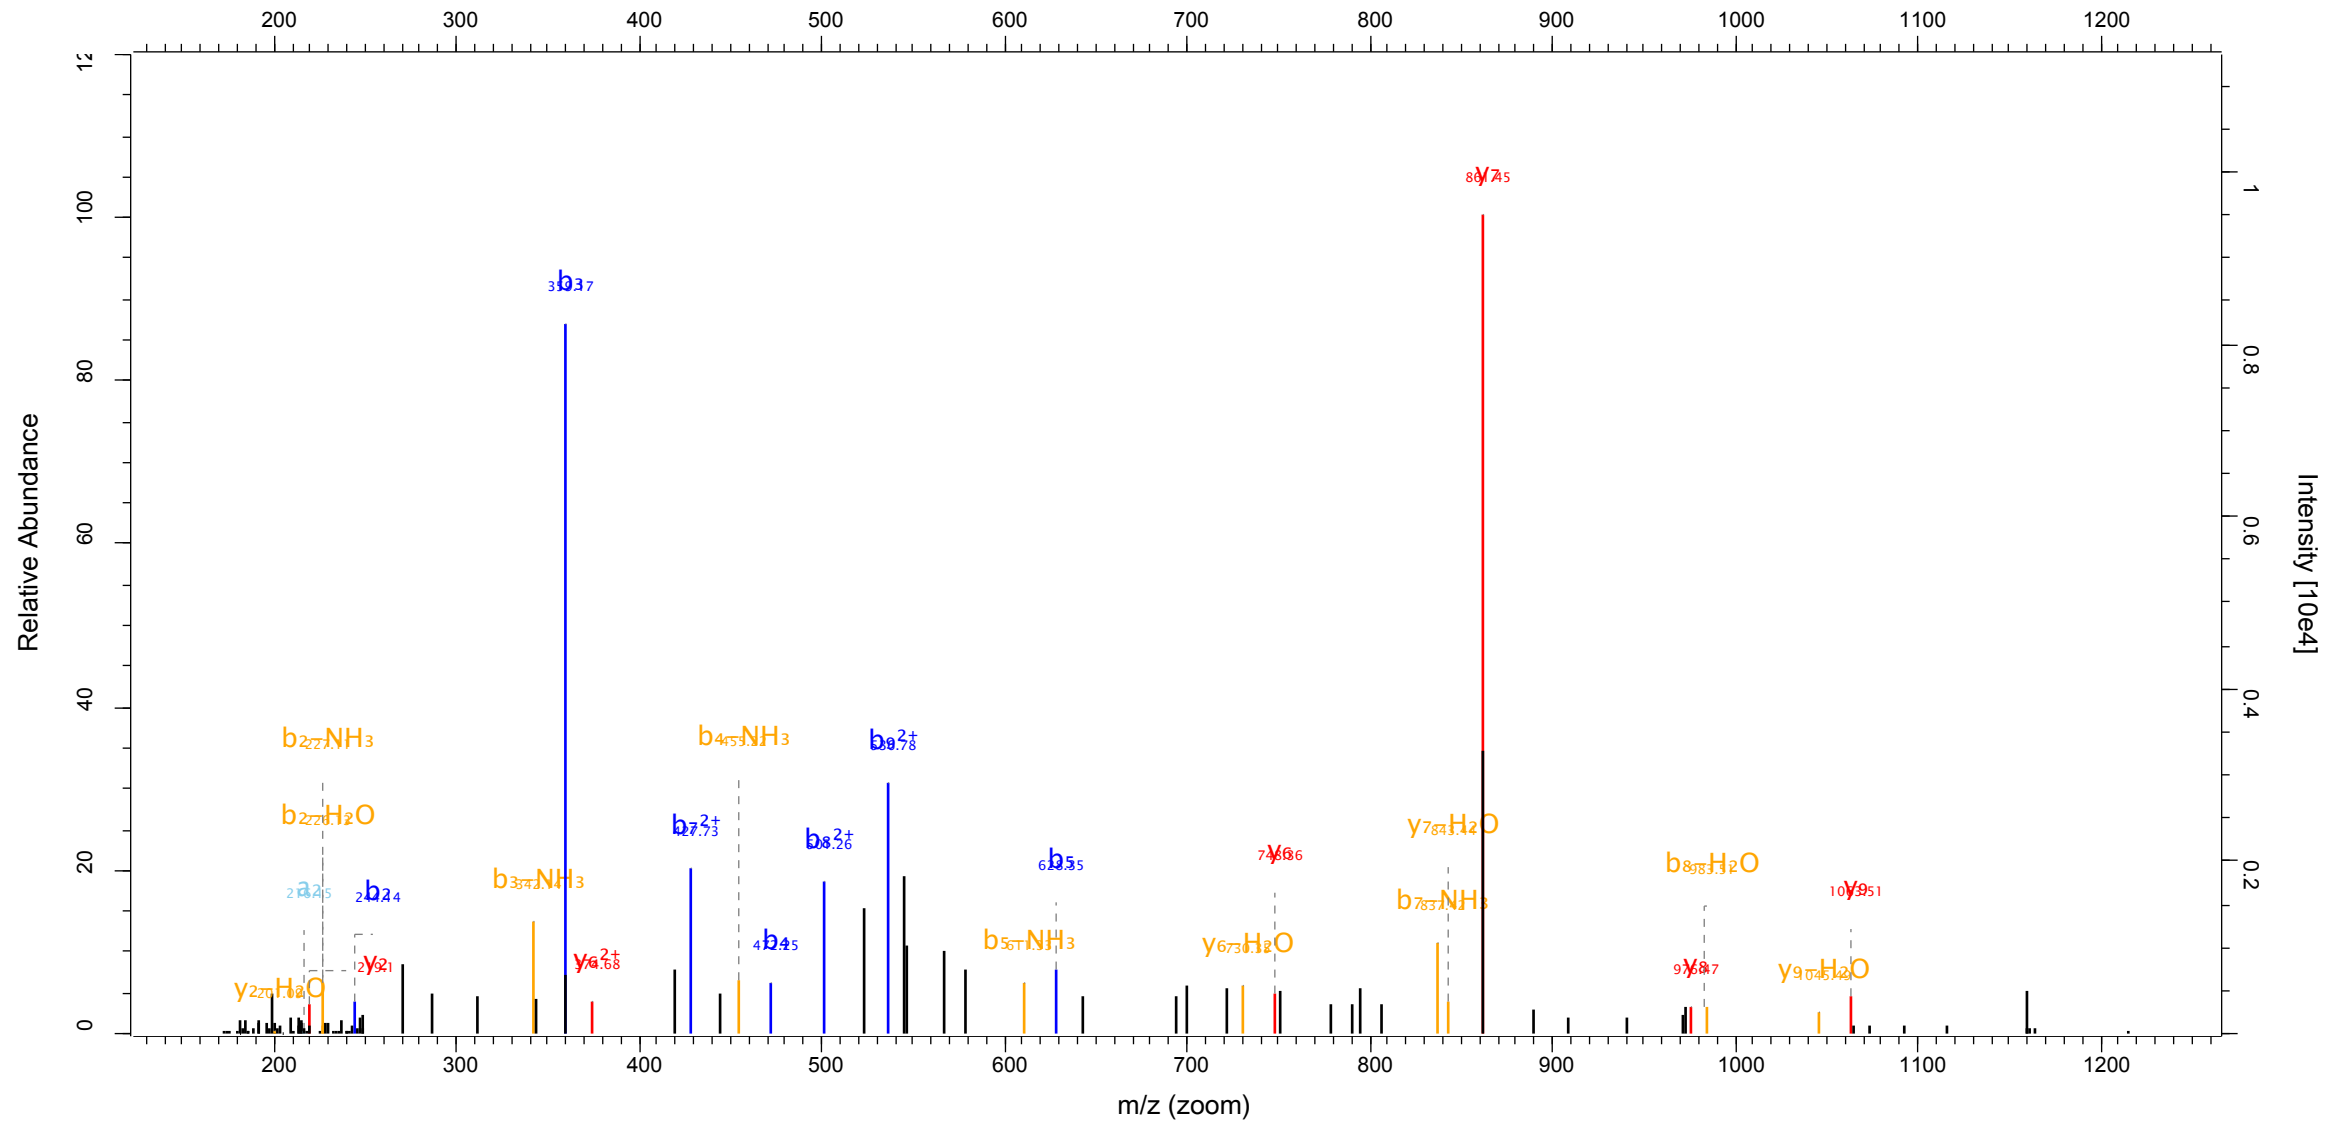

Scan number 28431 Raw file nak\_UBX7LSAX2\_20Jan11\_2  
 Method ITMS; CID Pepti... 93.35

**Protein Group 406**

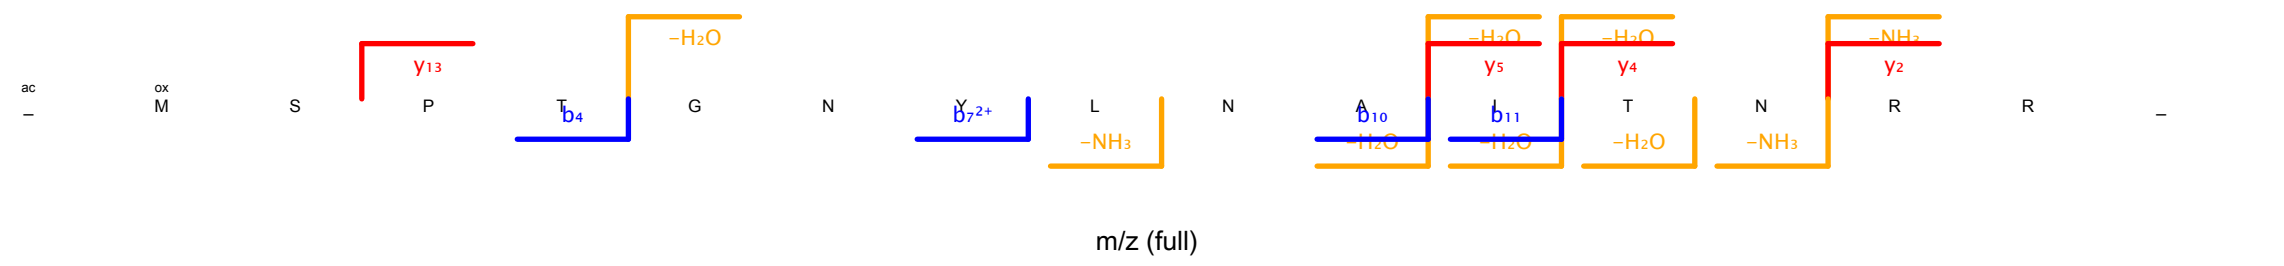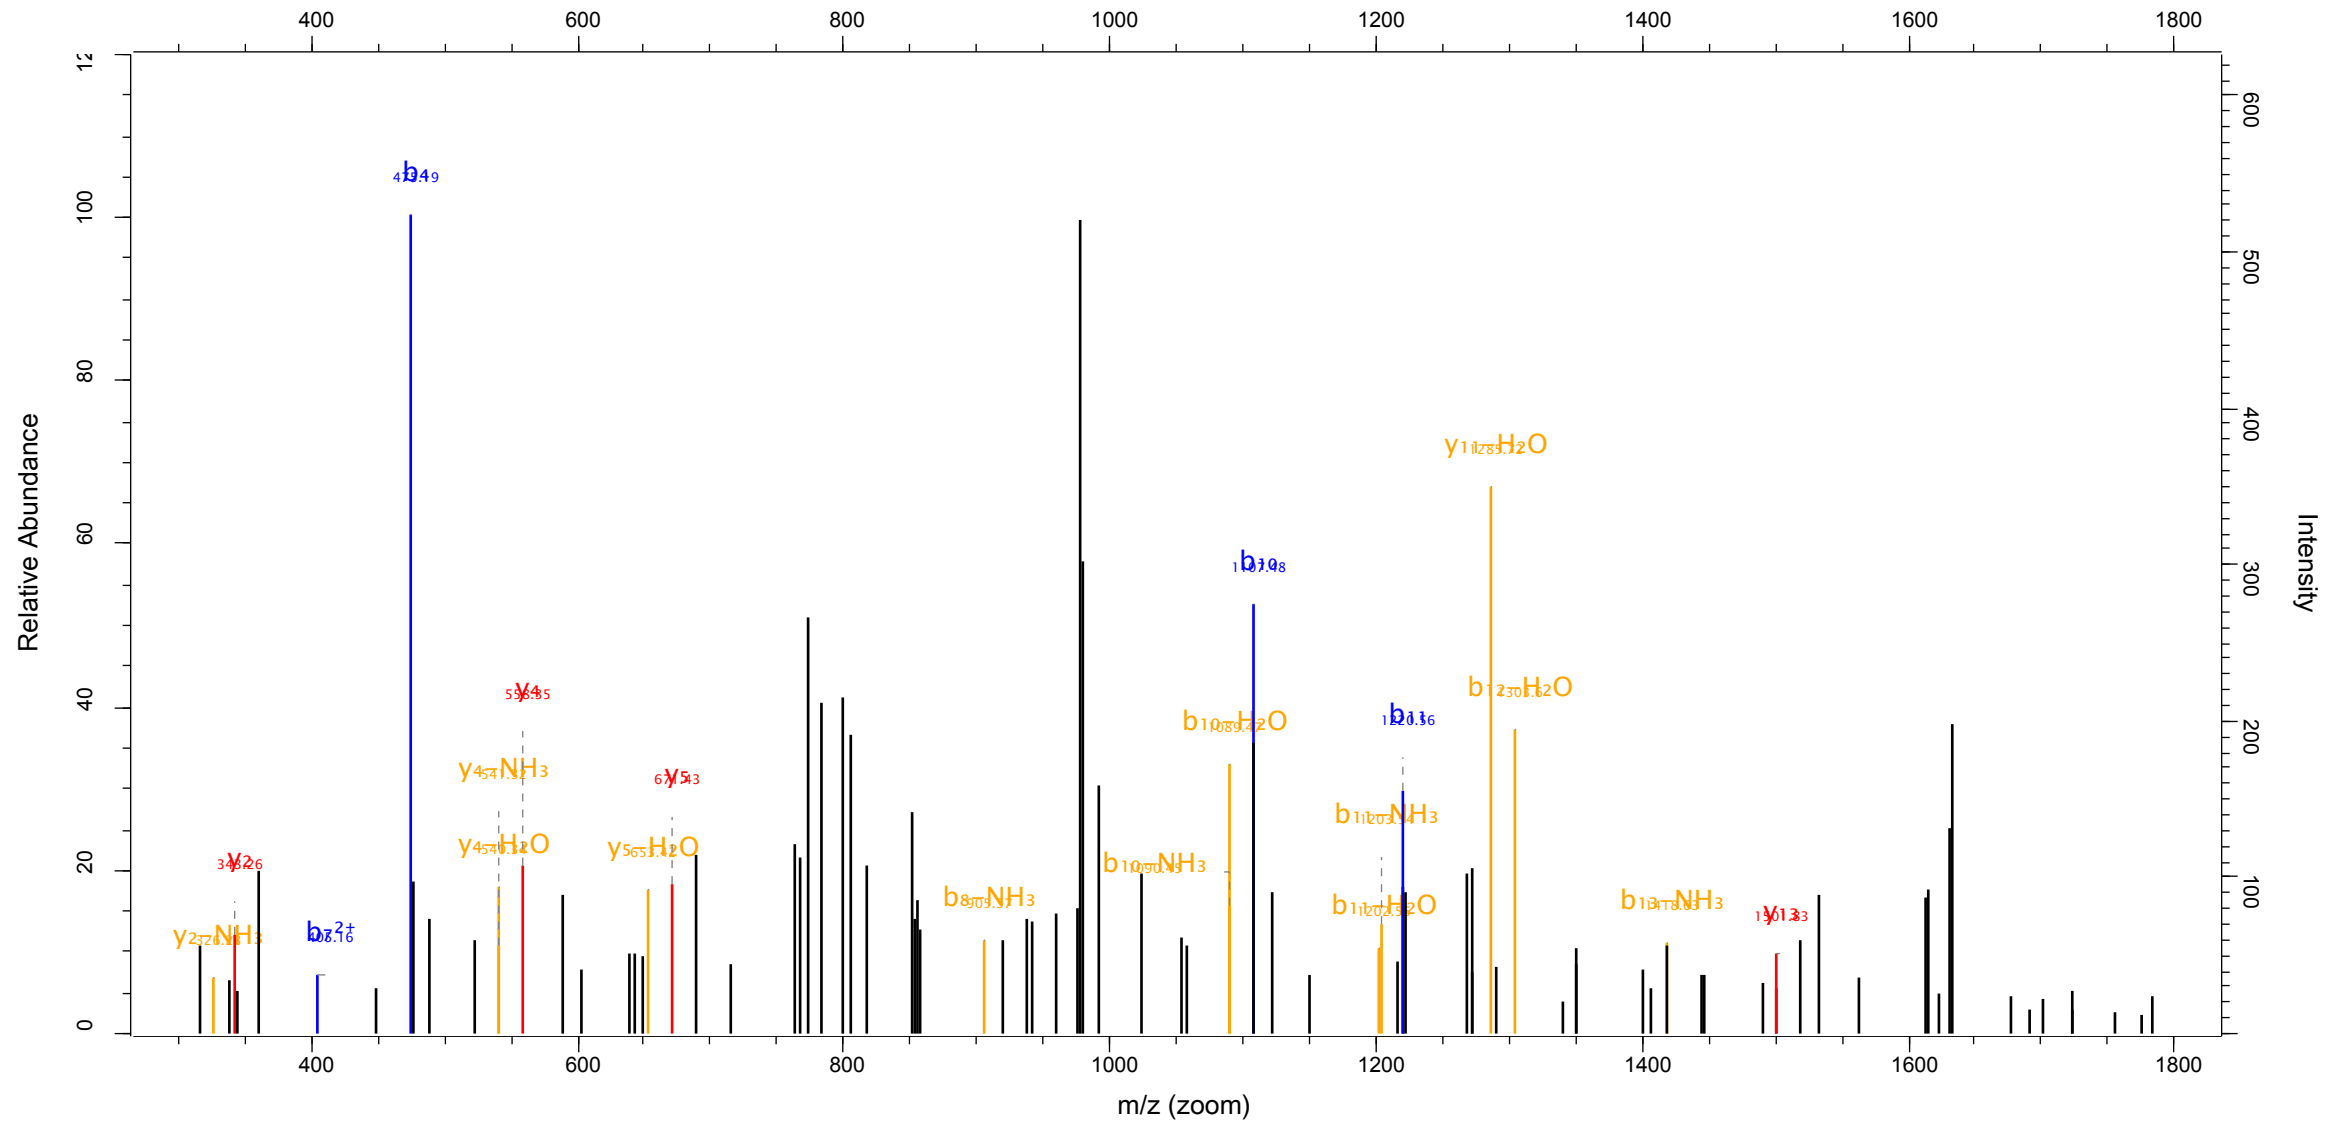

Scan number 33424 Raw file nak\_cdc48UbconjugatesSAX6\_21may17  
 Method ITMS; CID Pepti... 80.74

Protein Group 434

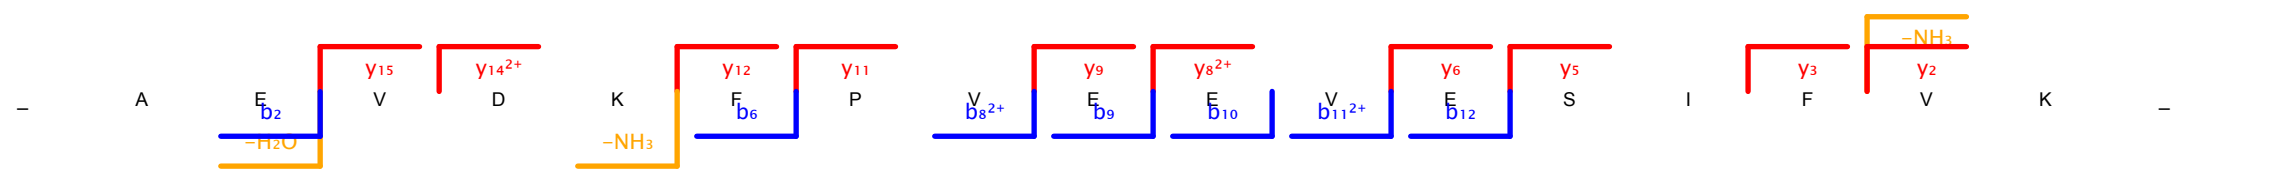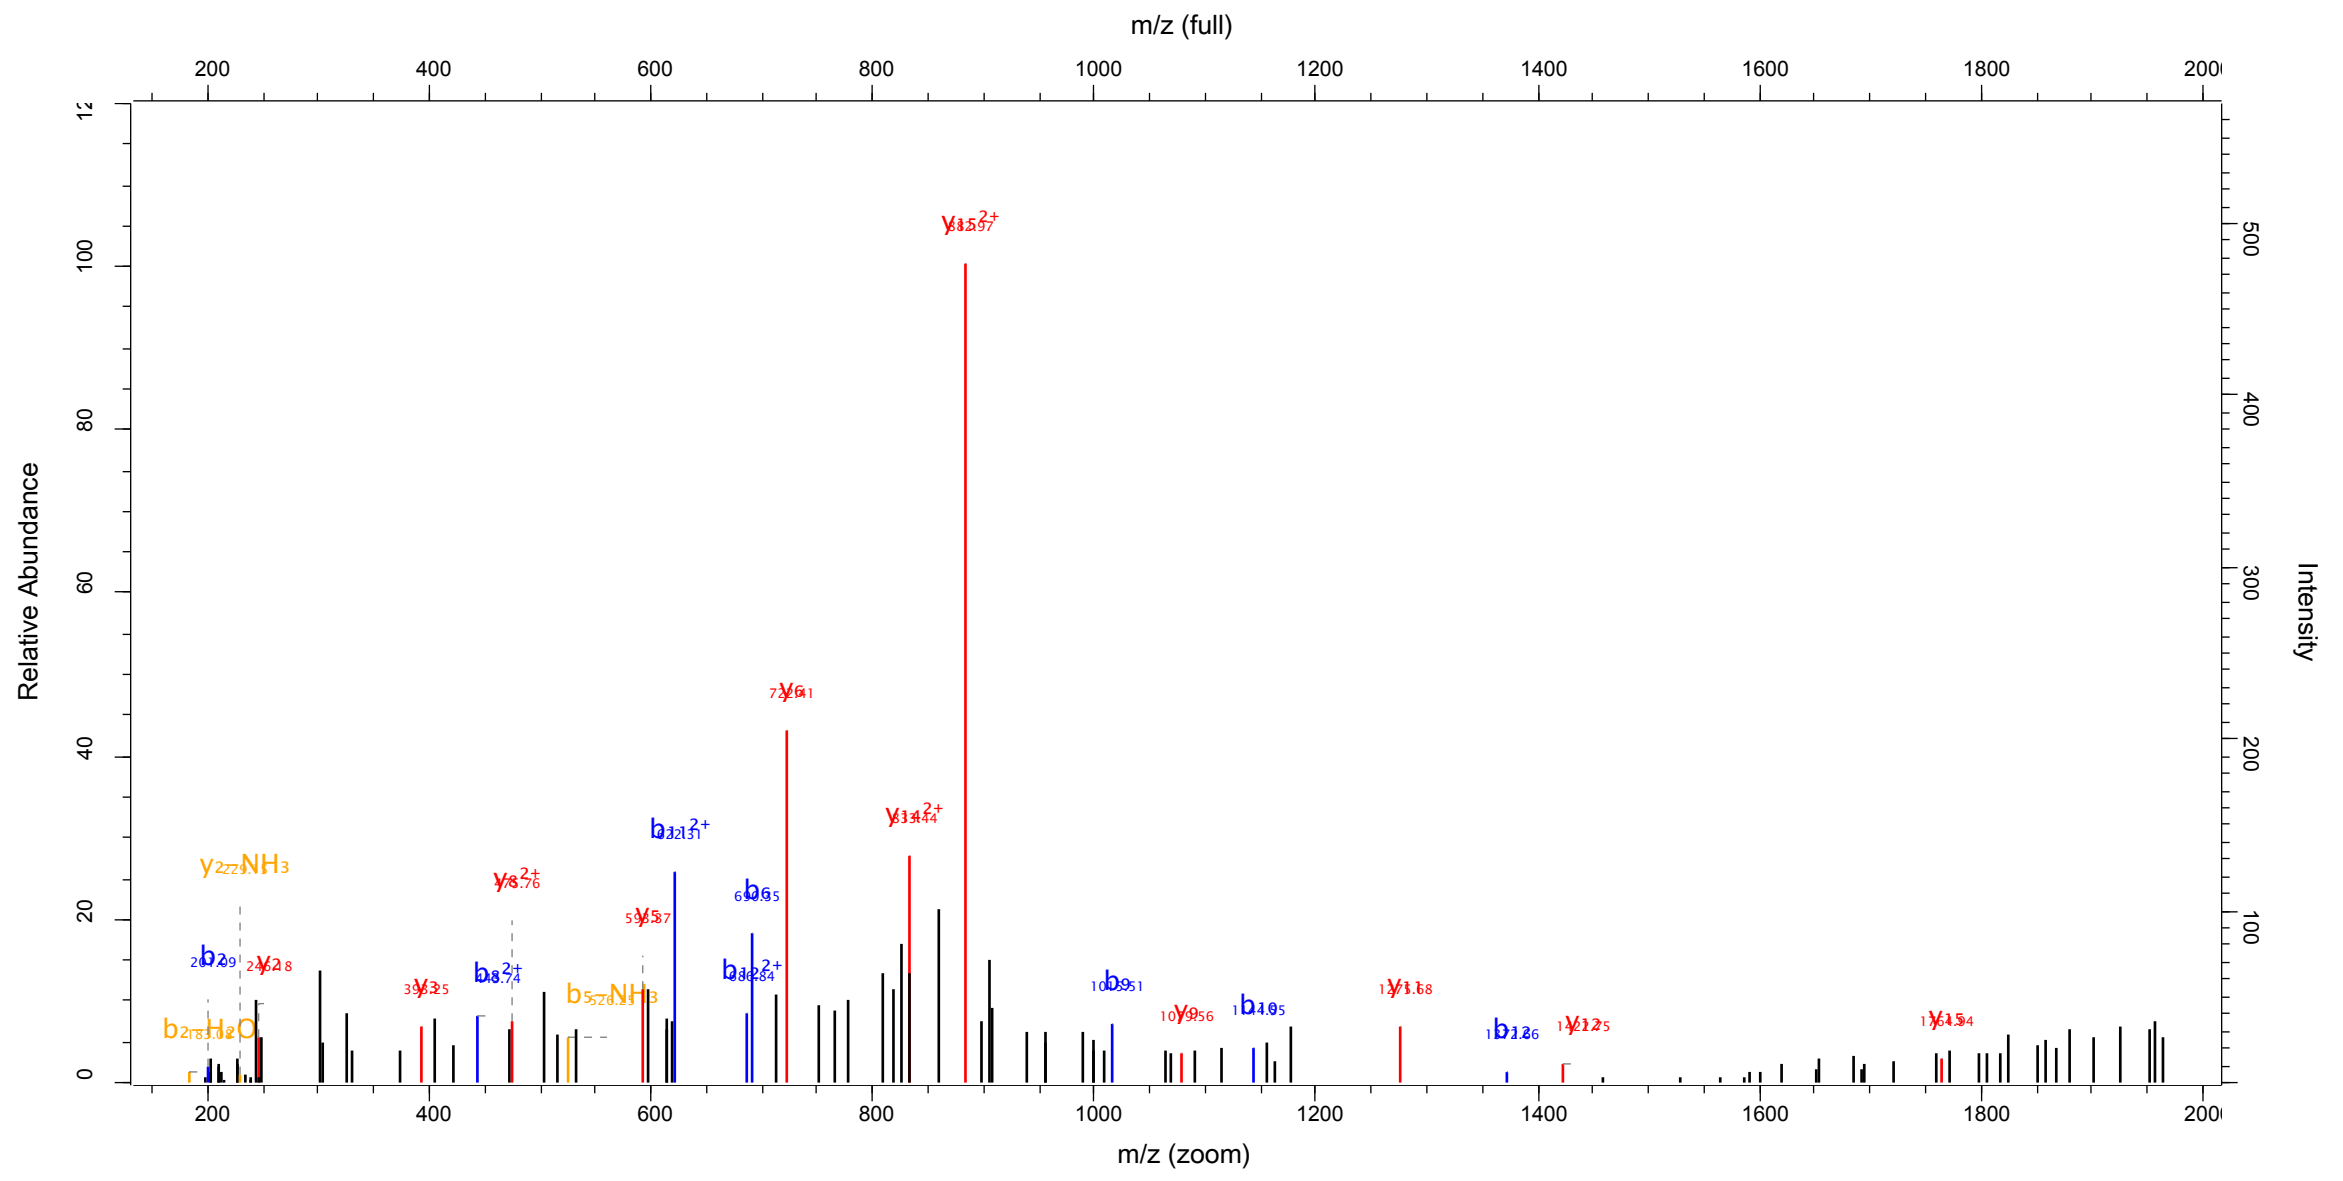

Scan number 13534 Raw file nak\_cdc48UbconjugatesSAX6\_14may10\_10  
 Method ITMS; CID Pepti... 101.3

**Protein Group 471**

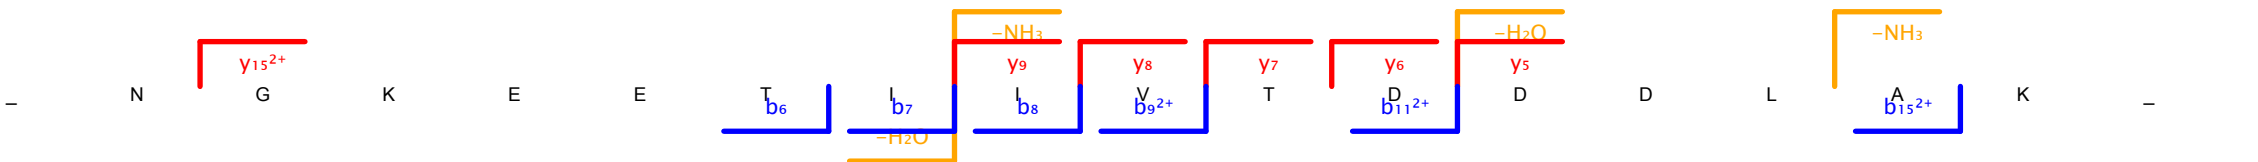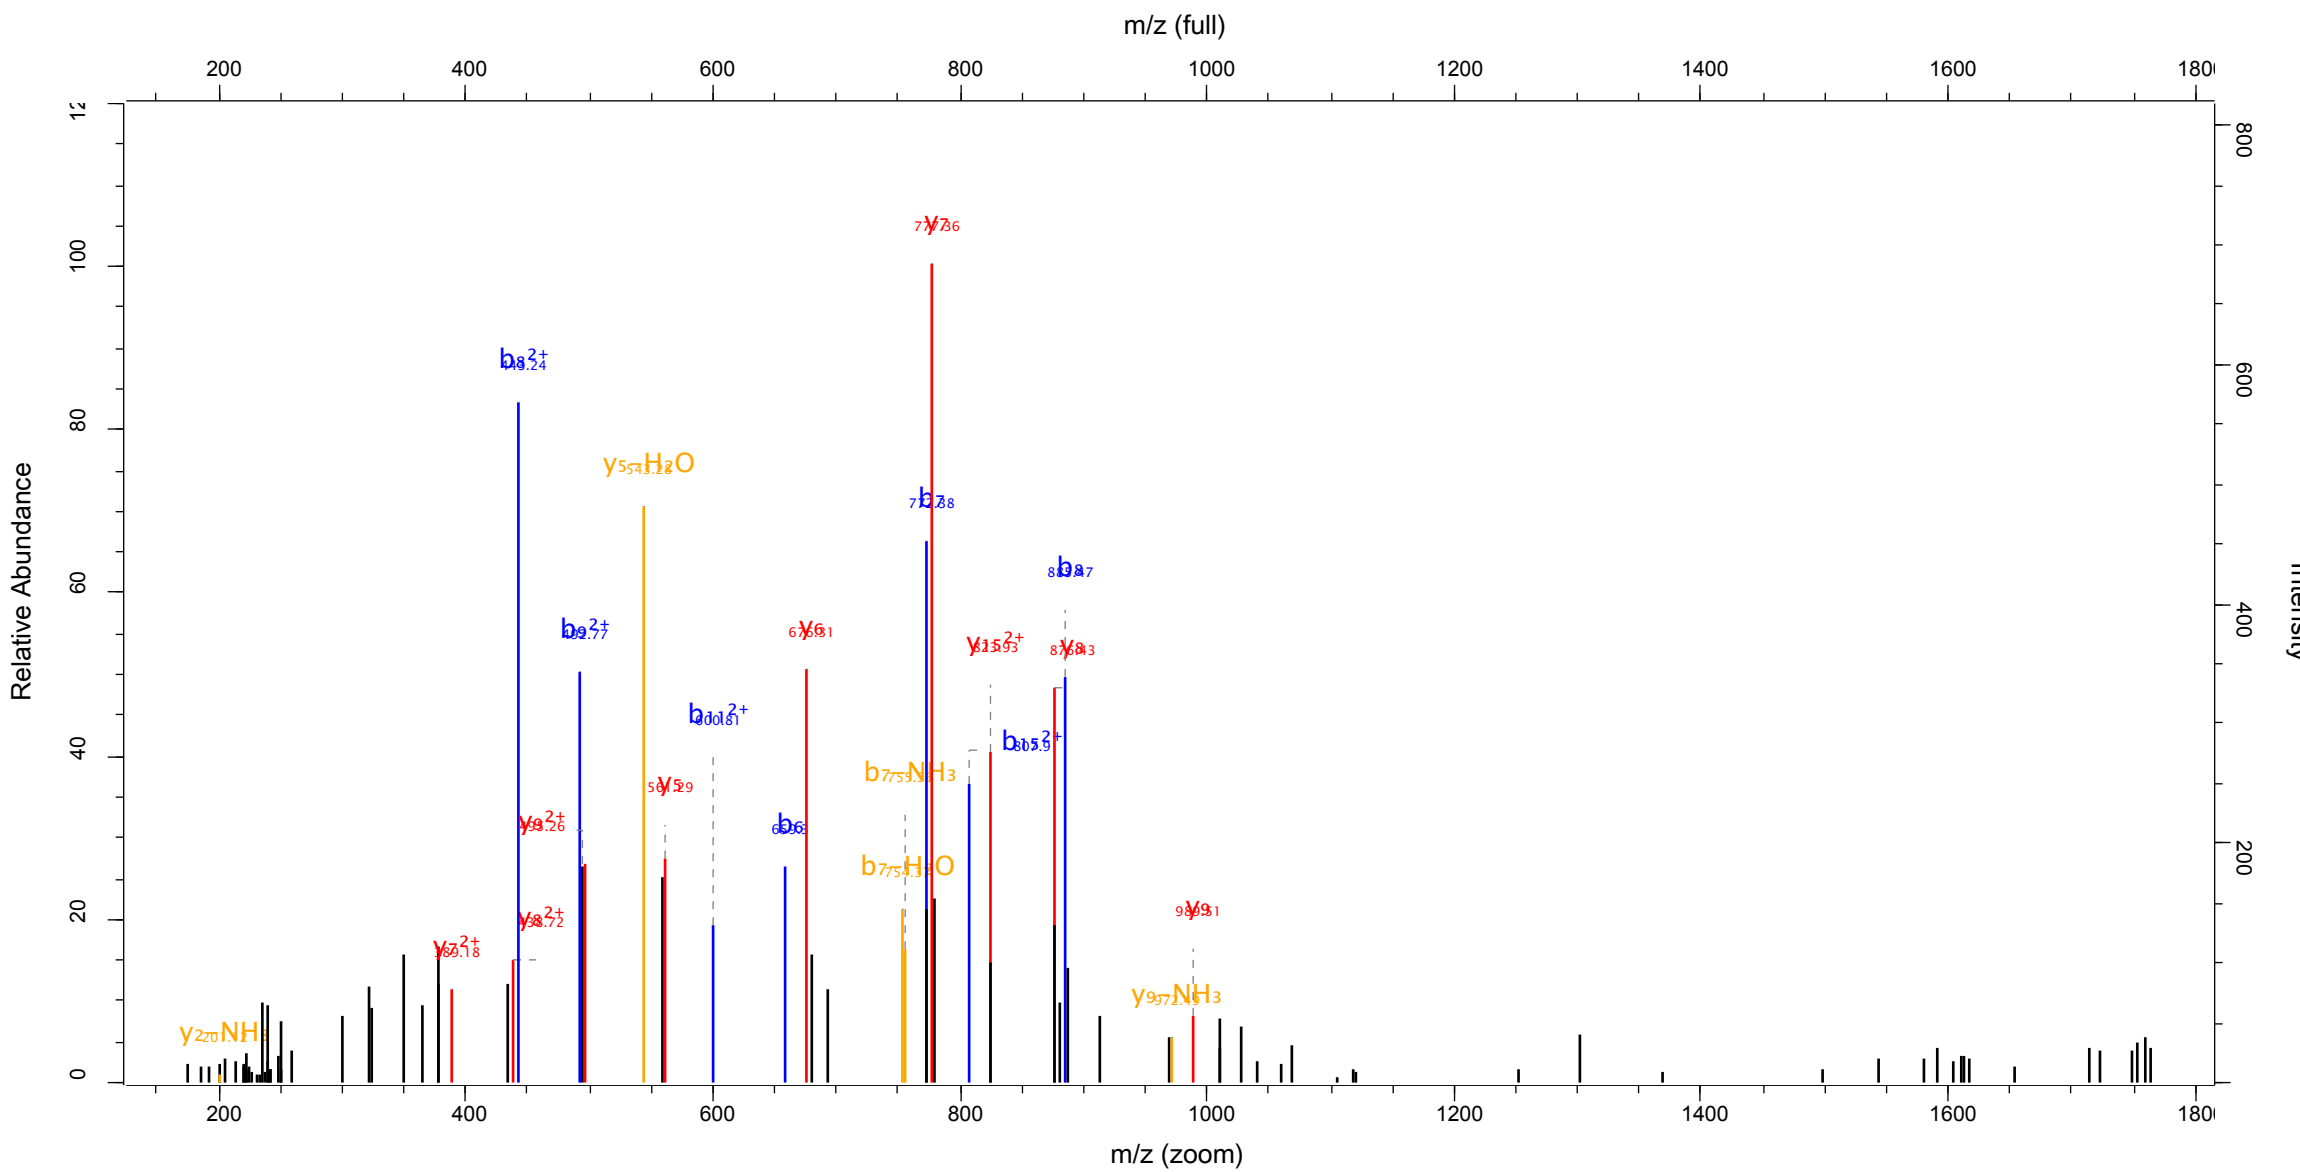

Scan number  
Method

22389  
ITMS; CID

Raw file  
Pepti...

nak\_UBX2HSAX4\_8feb11\_08  
82.67

Protein Group 498

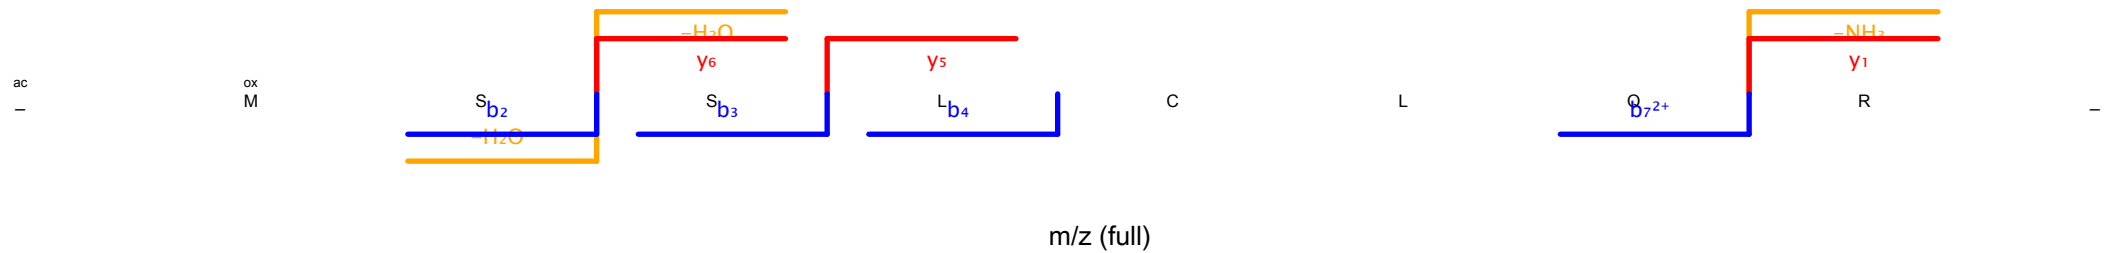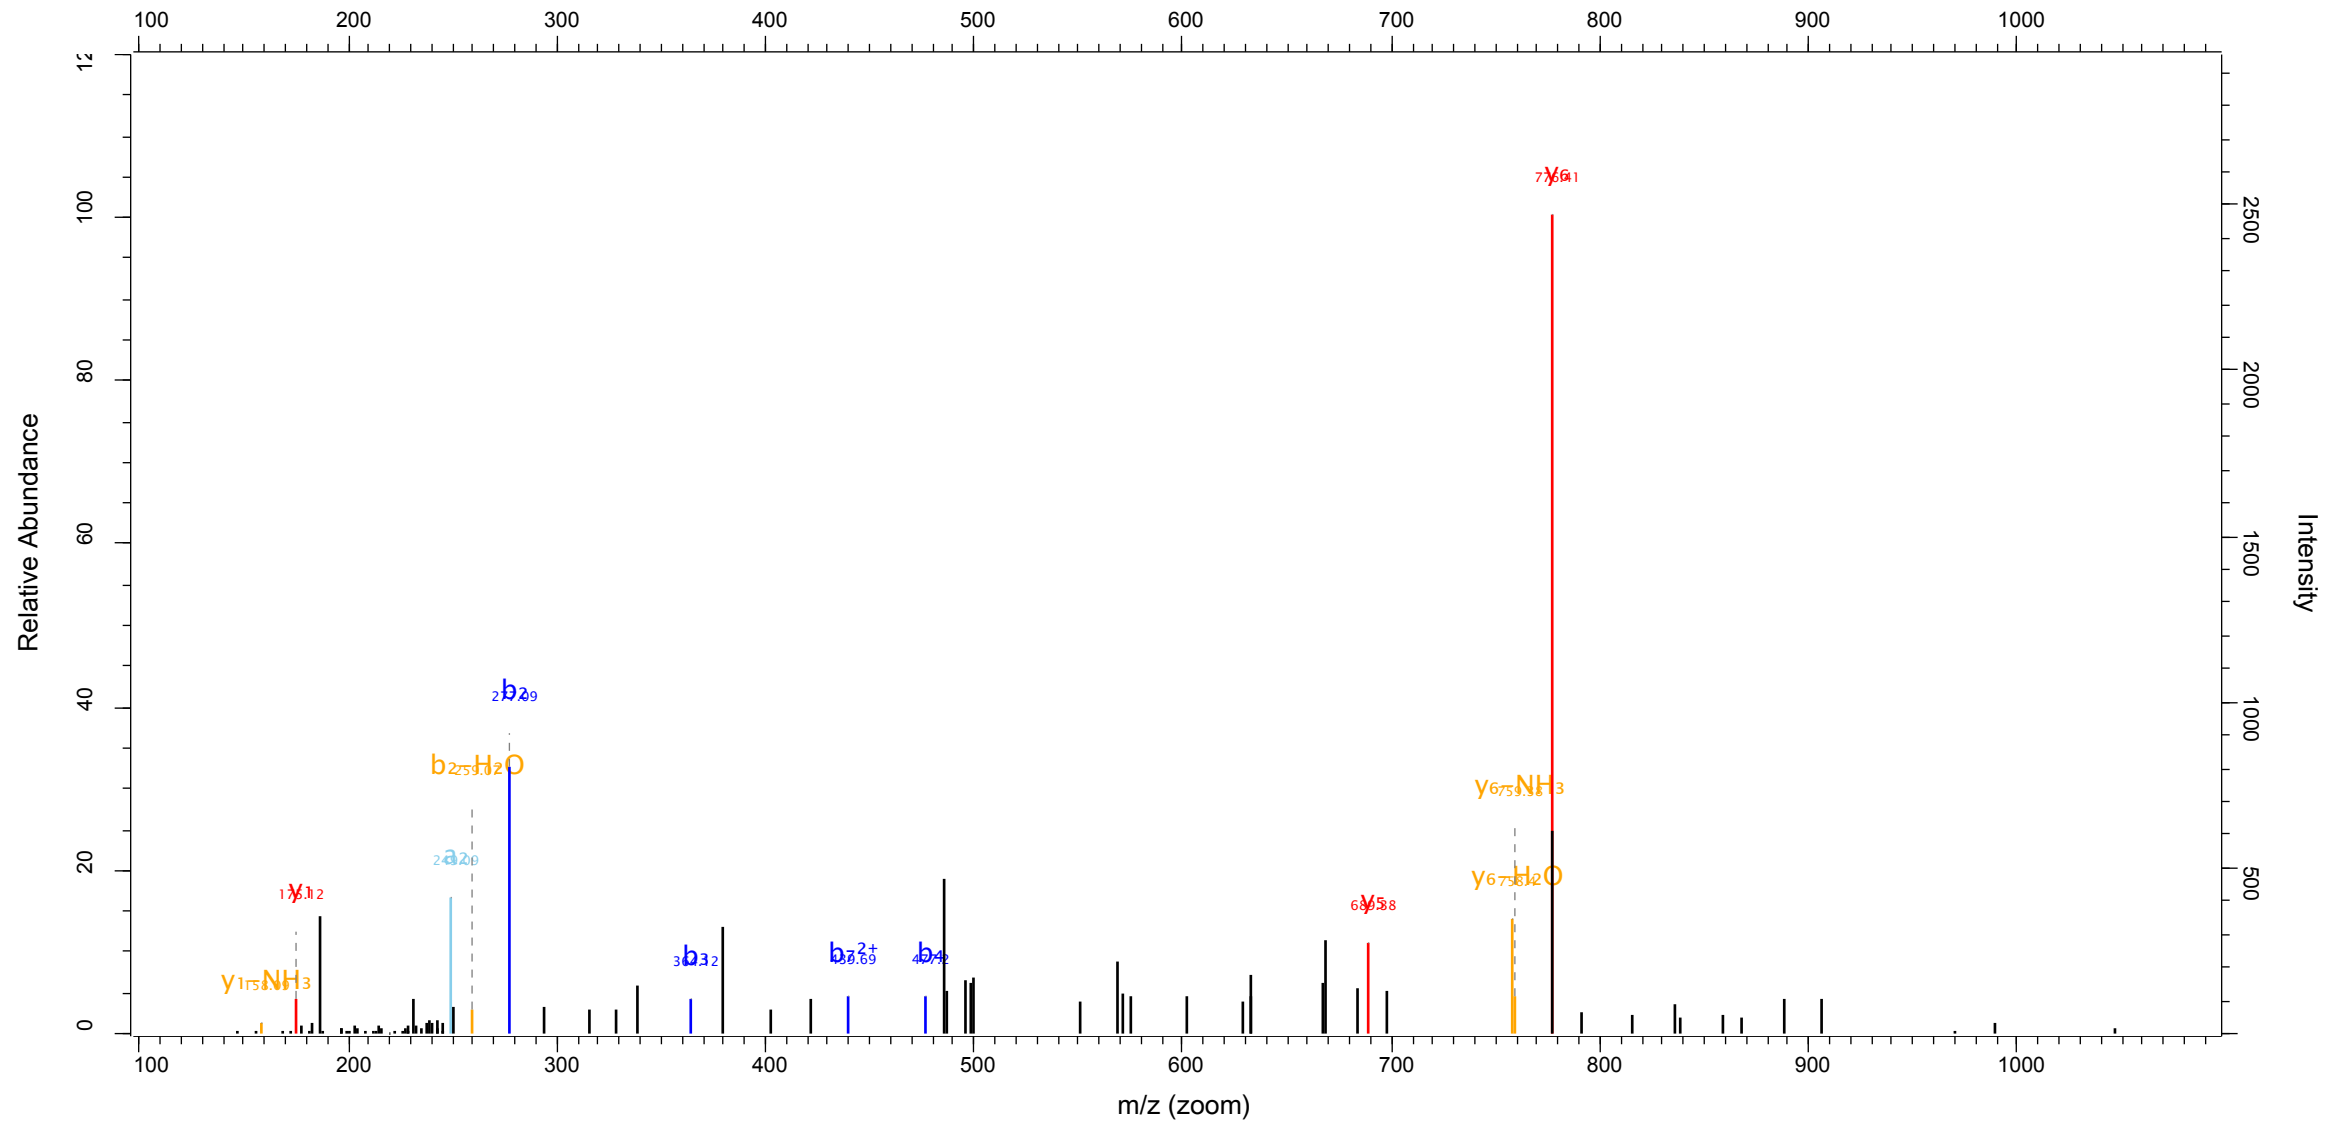

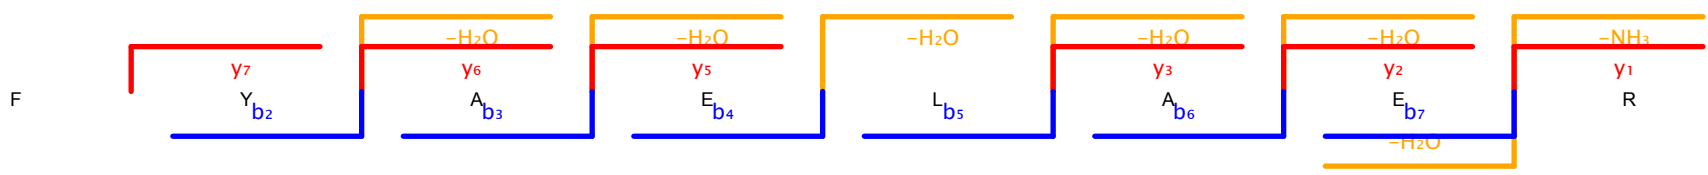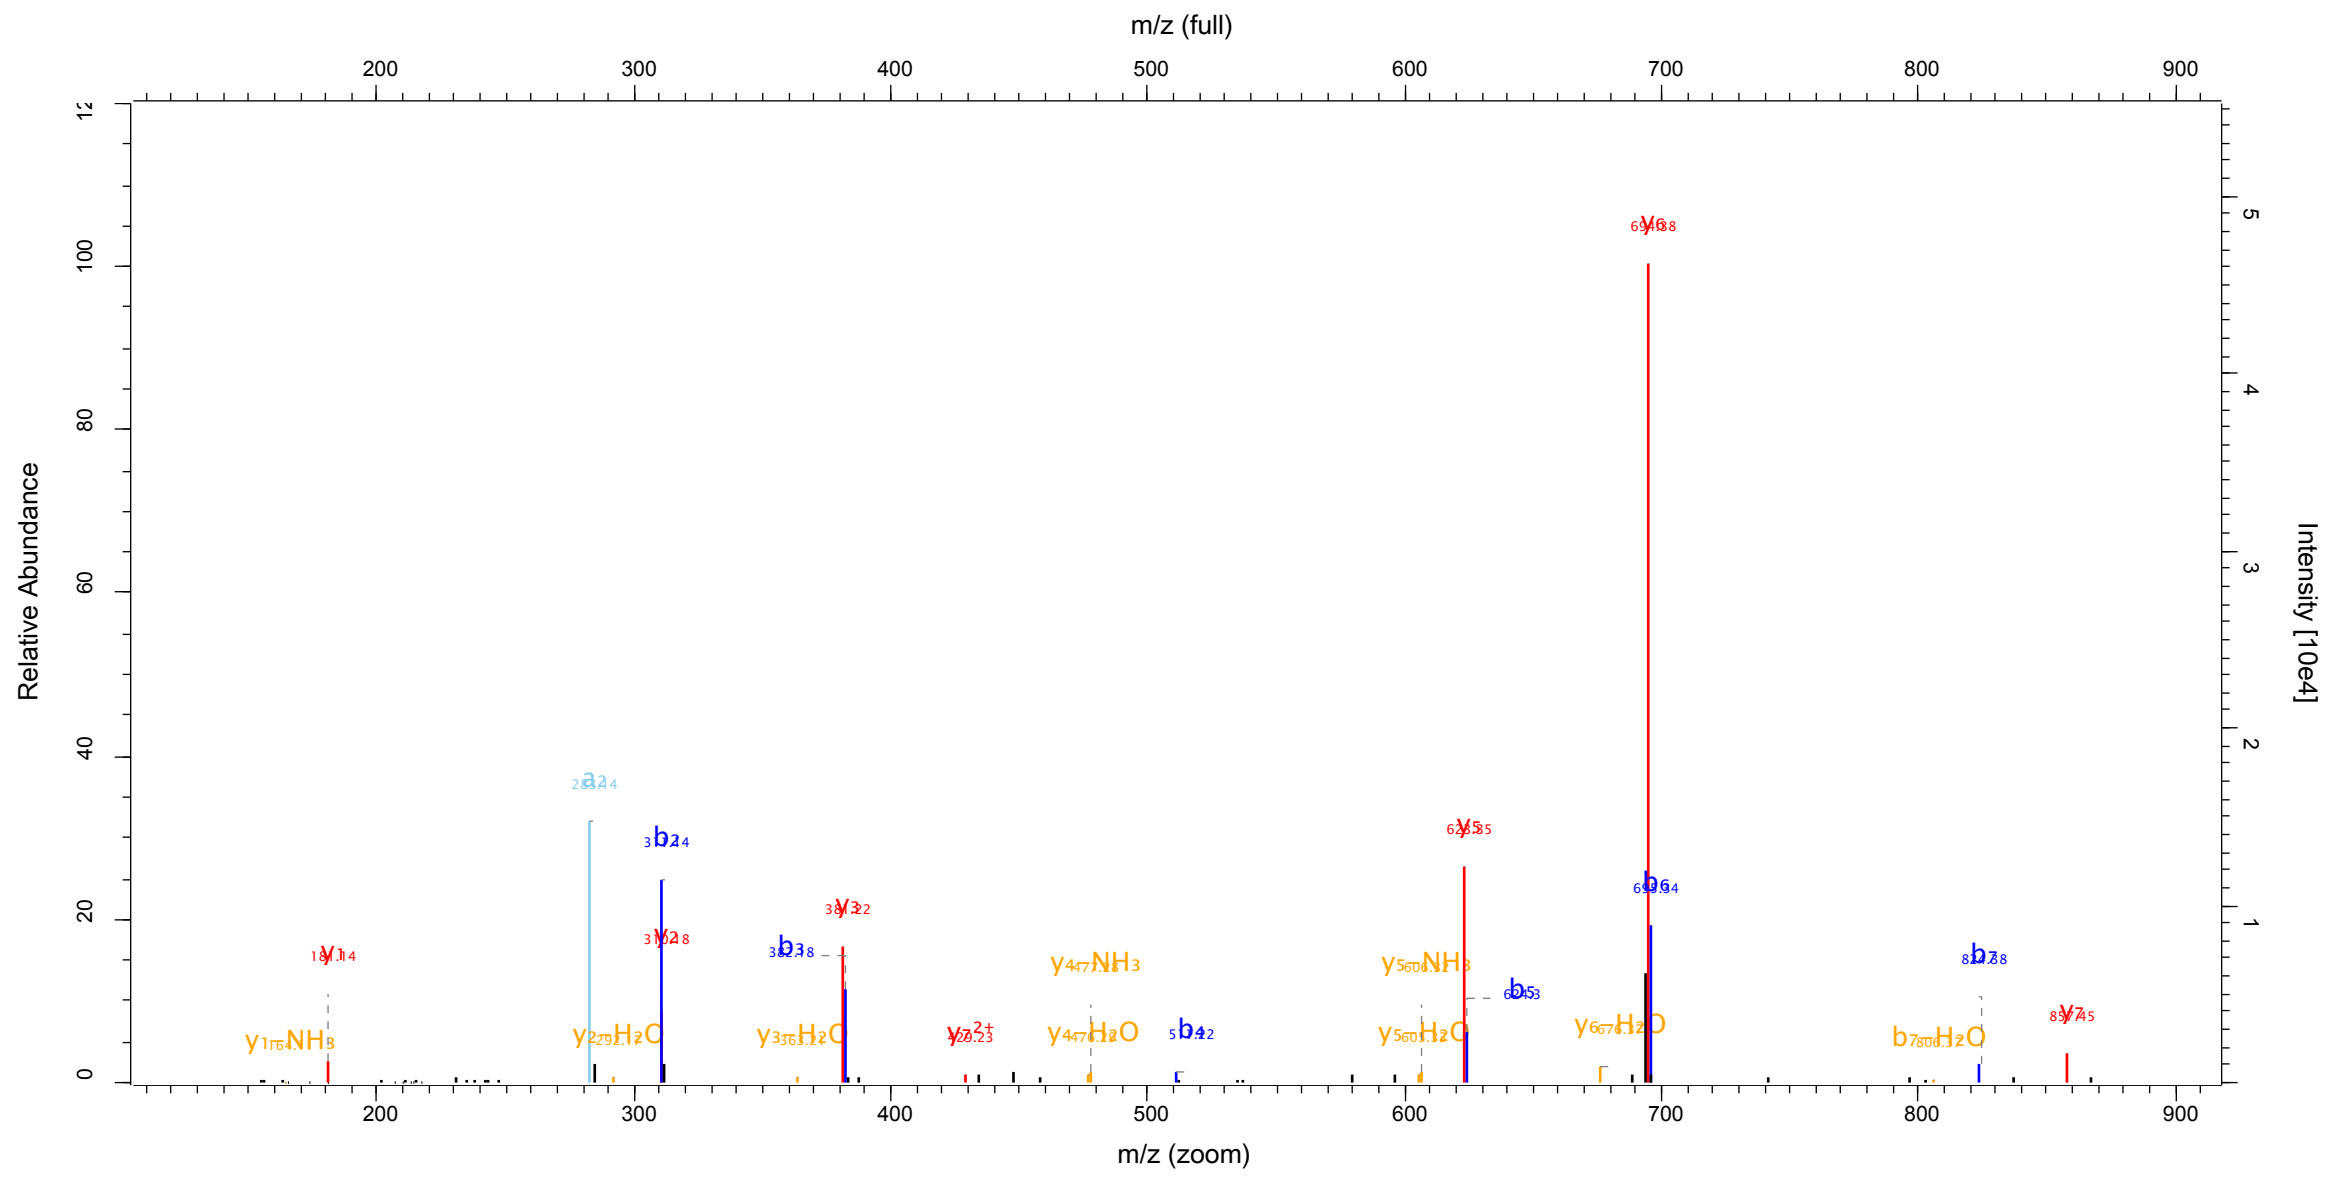

Scan number 16200 Raw file nak\_cdc48UbconjugatesSAX5\_14may10\_09  
 Method ITMS; CID Pepti... 141.7

**Protein Group 515**

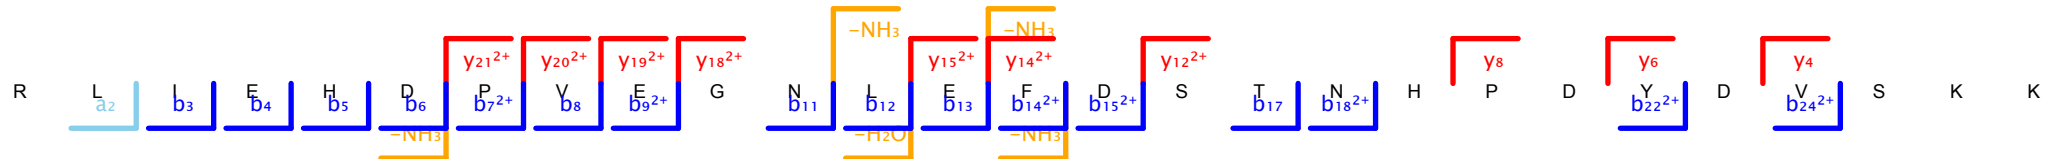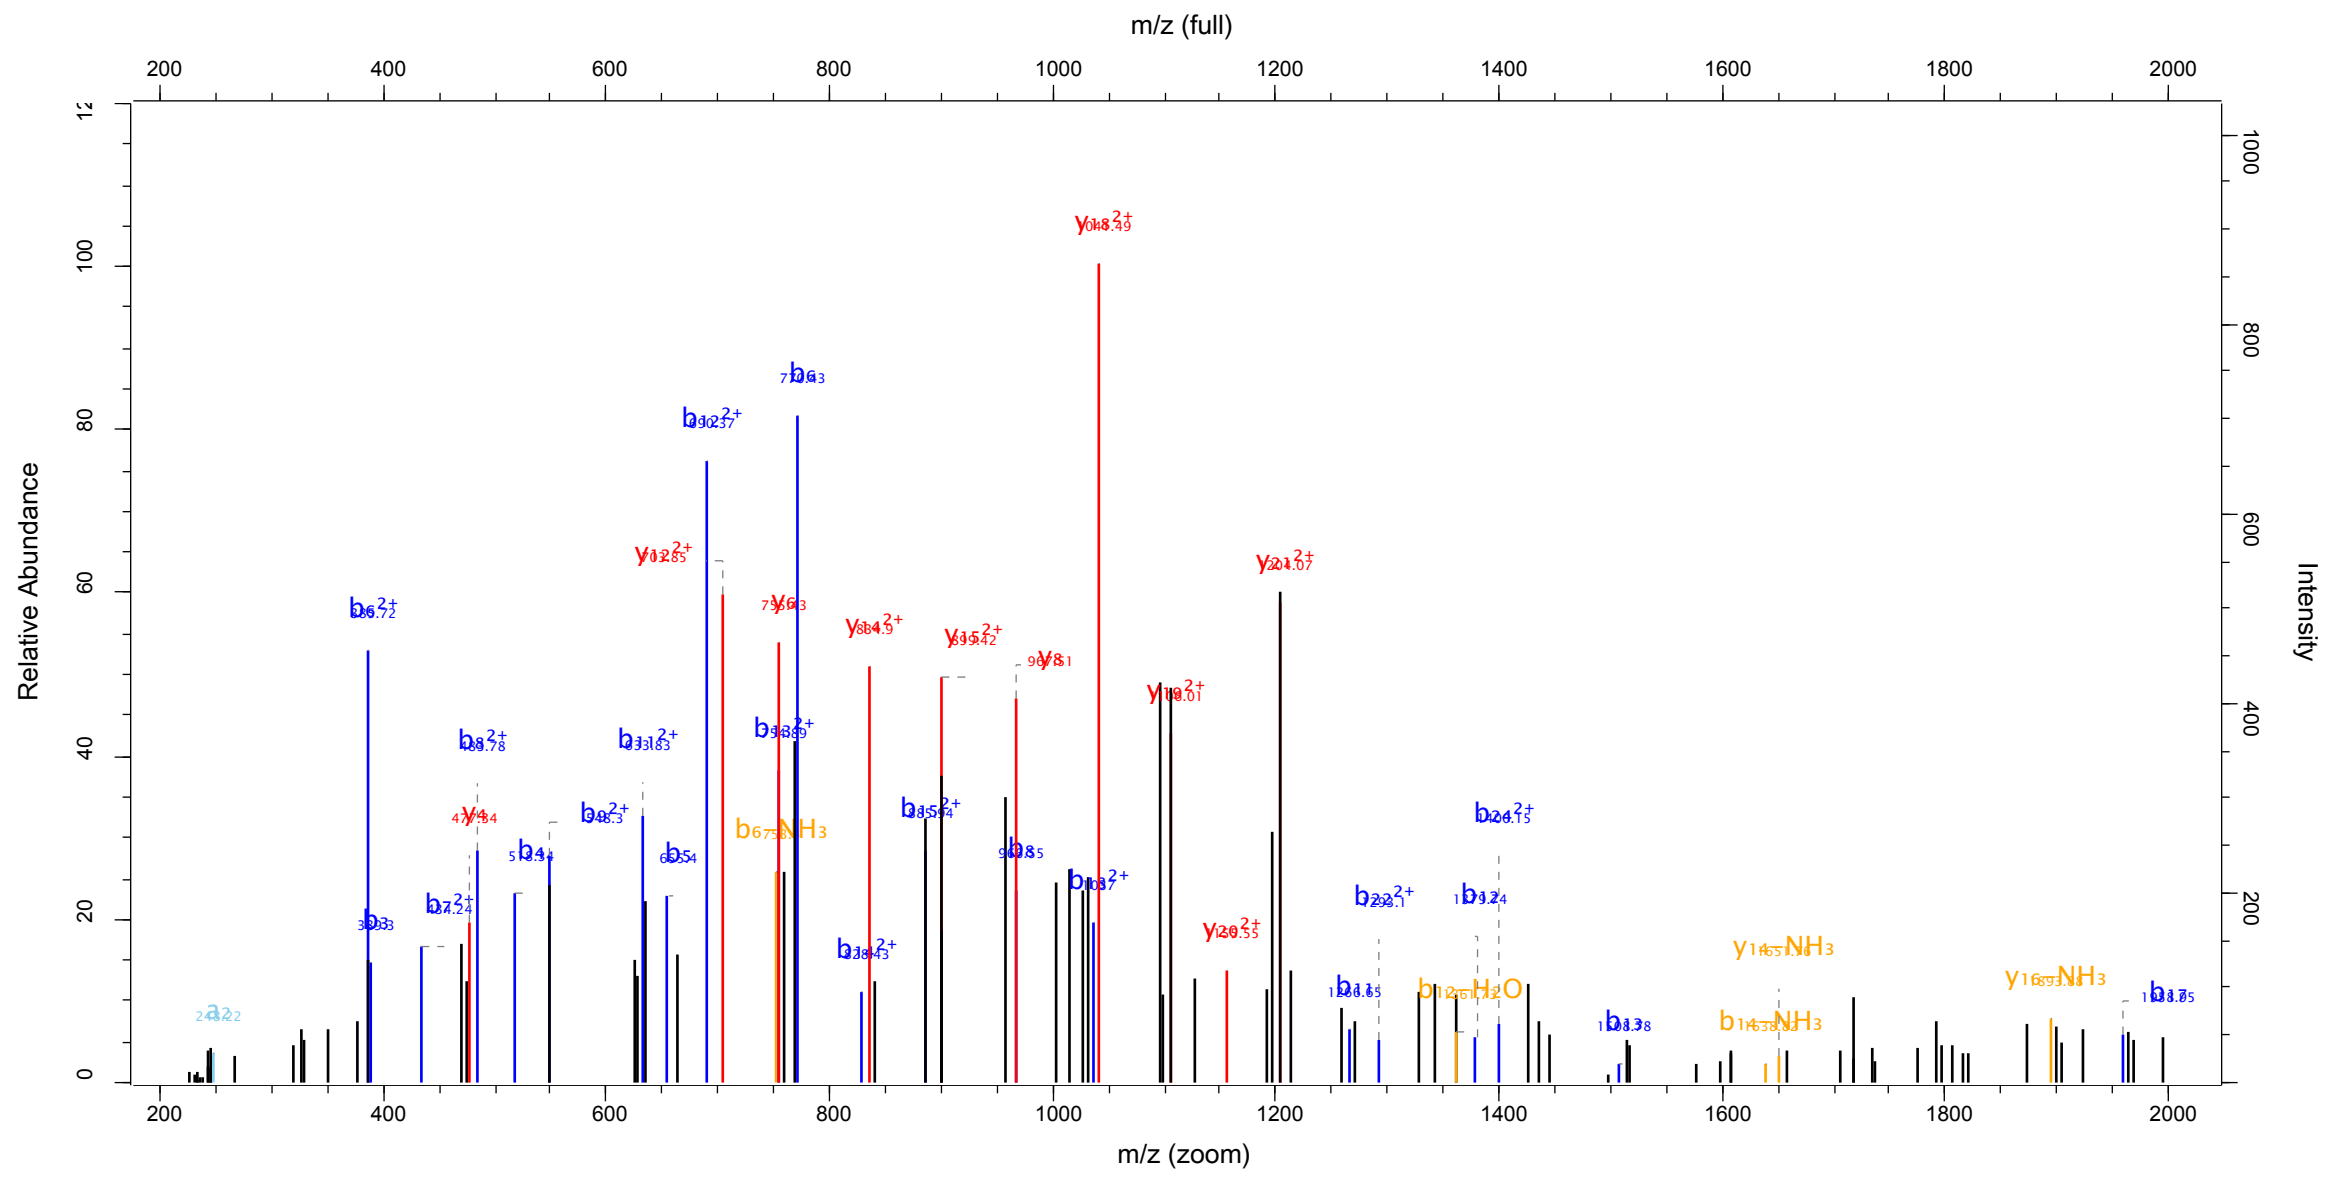



Scan number  
Method

22247  
ITMS; CID

Raw file  
Pepti...

nak\_ubx4LightSAX5\_11 nov05  
117.7

Protein Group 540

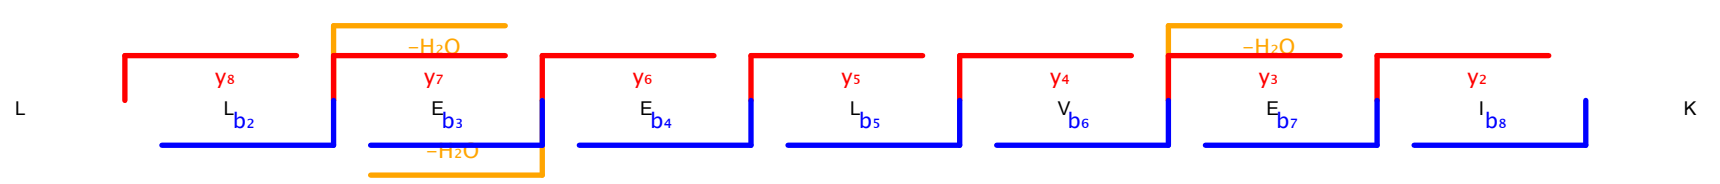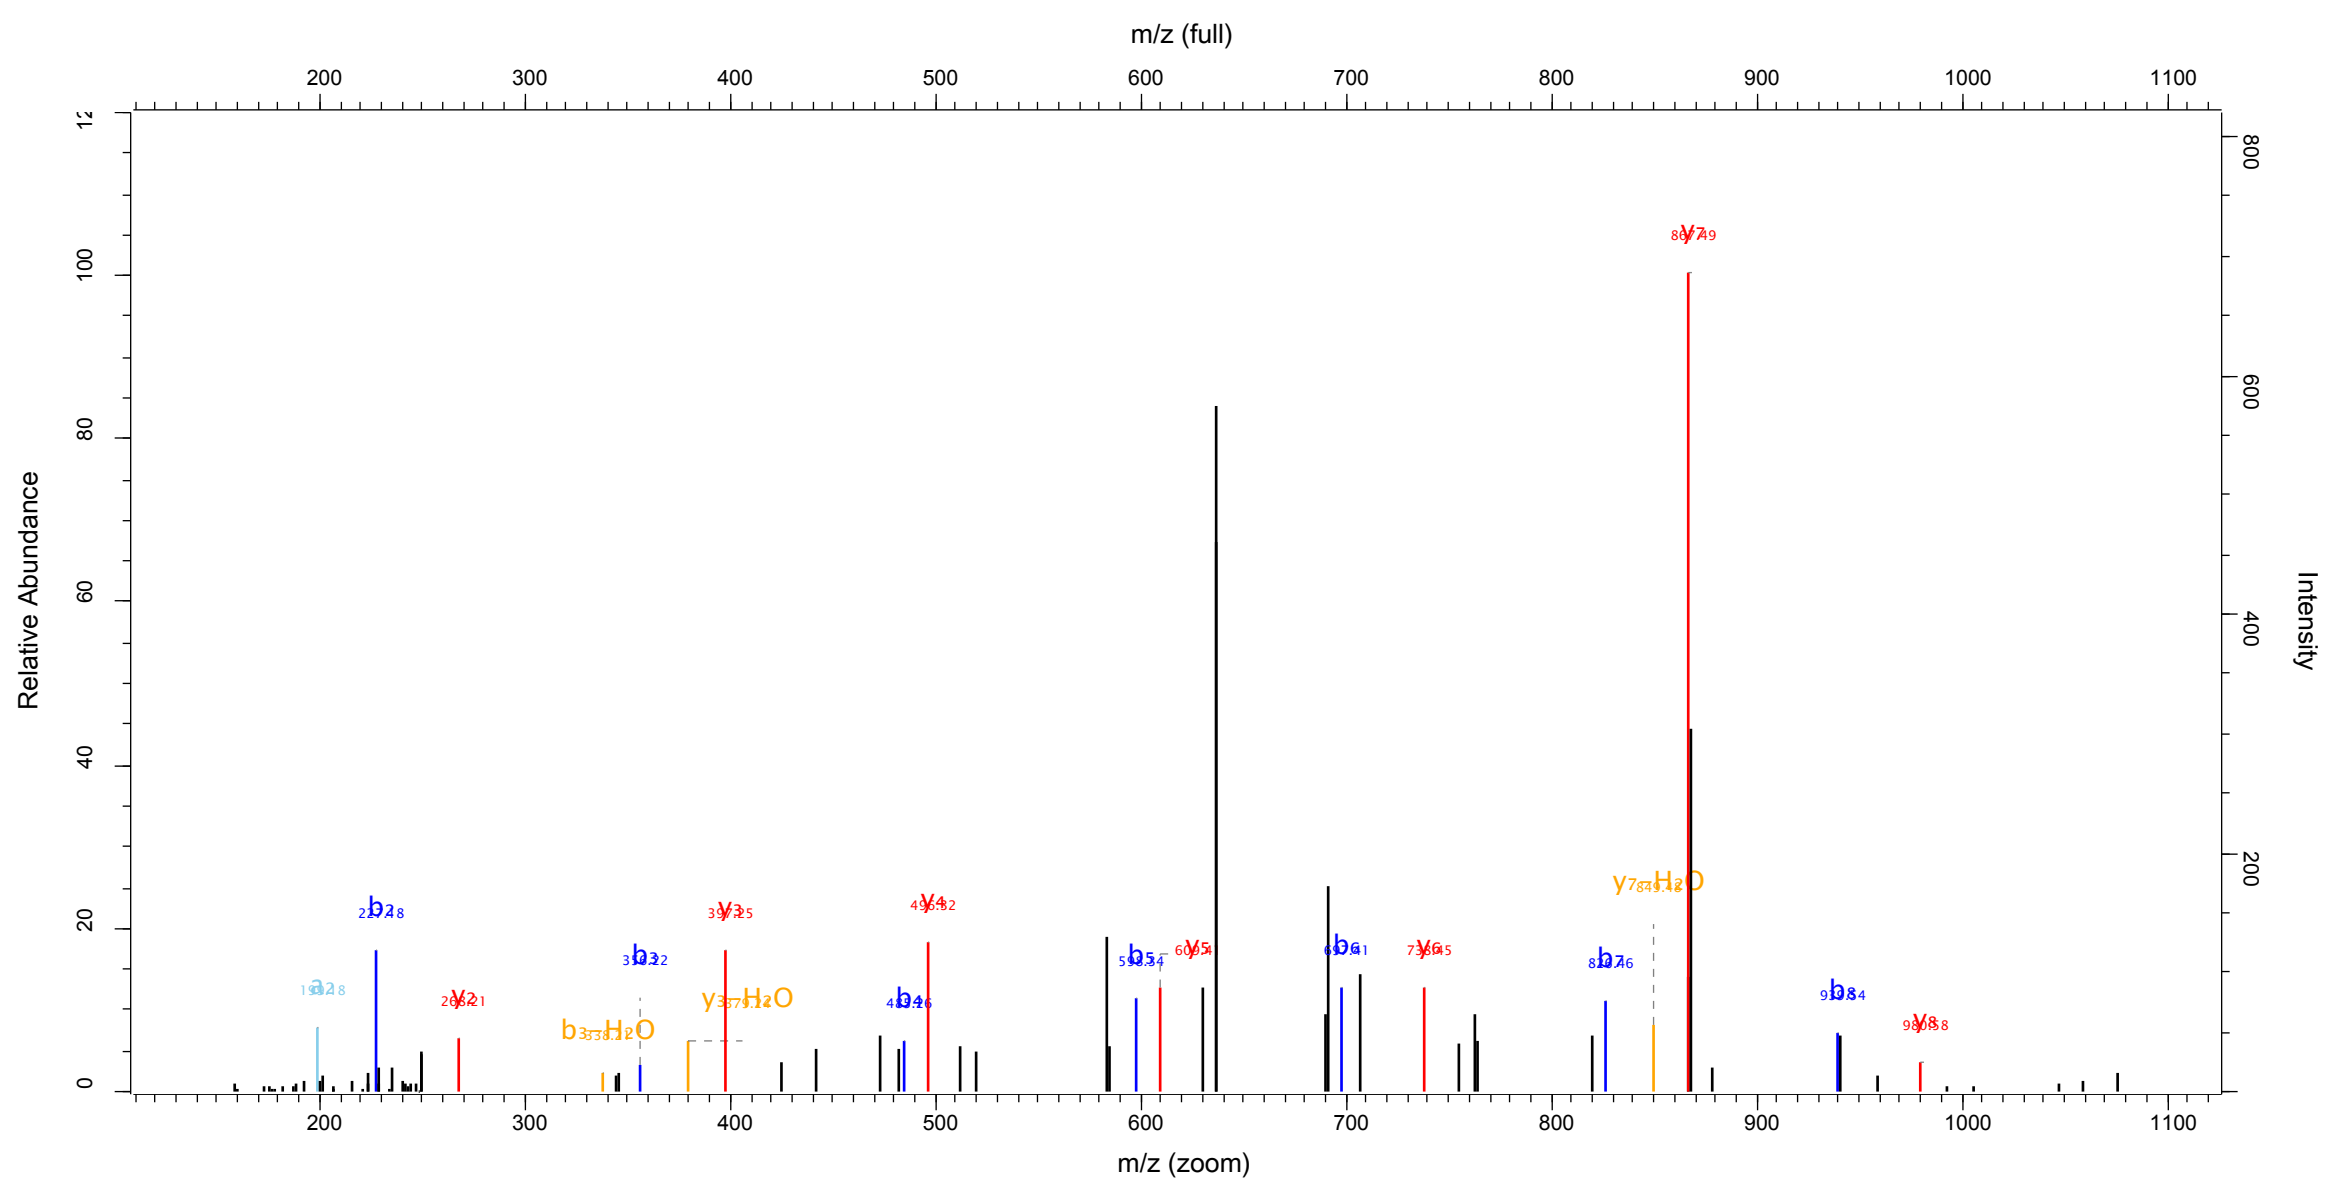

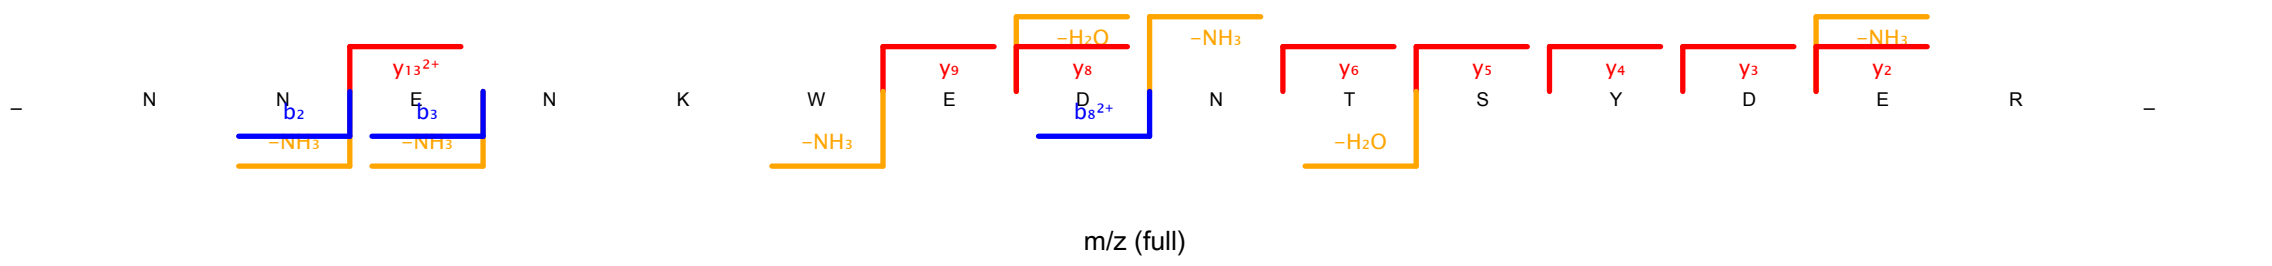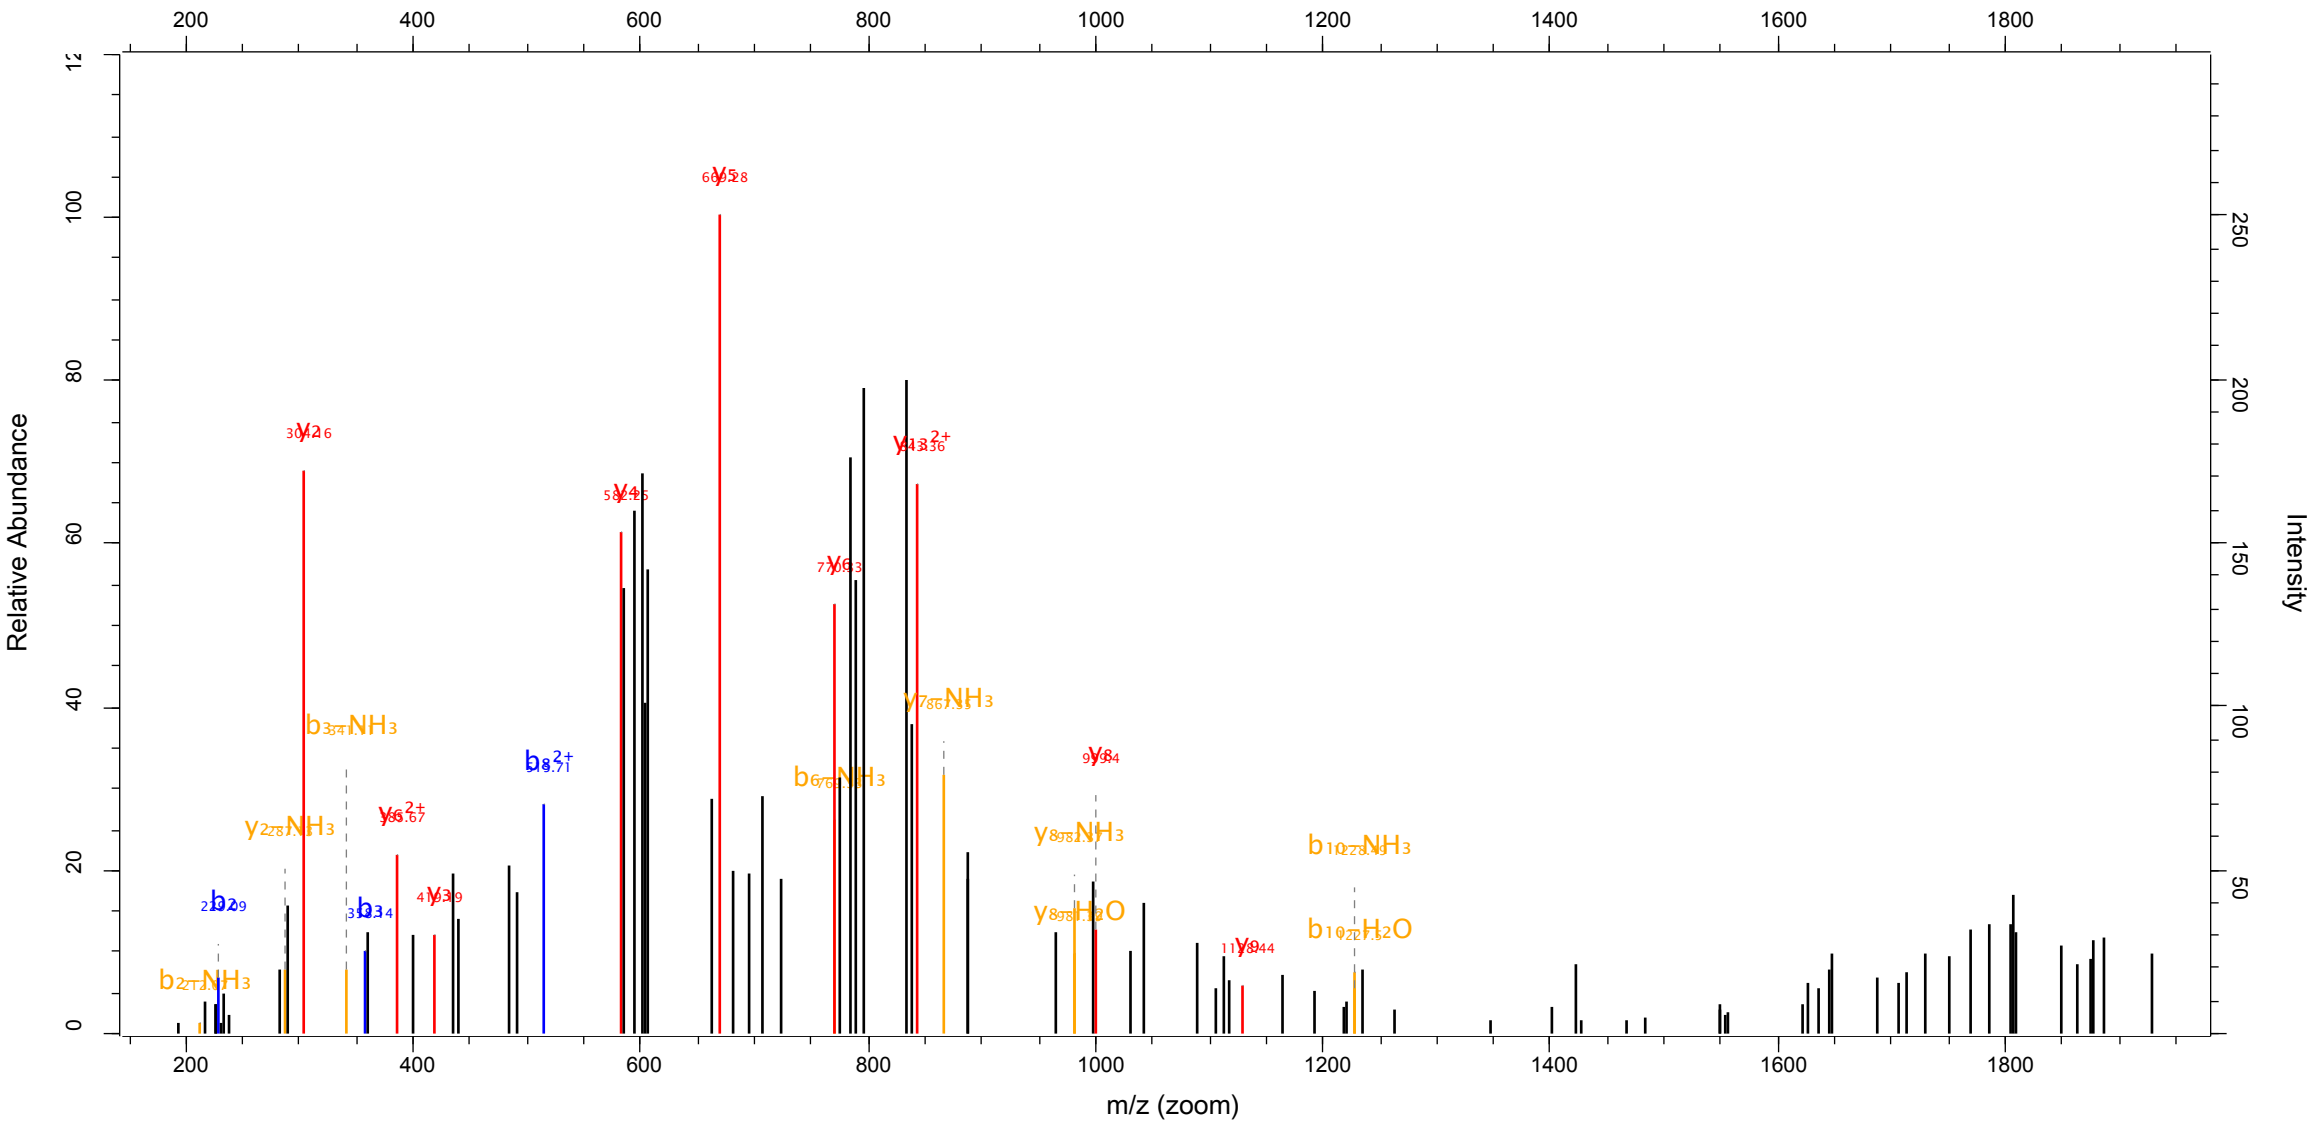

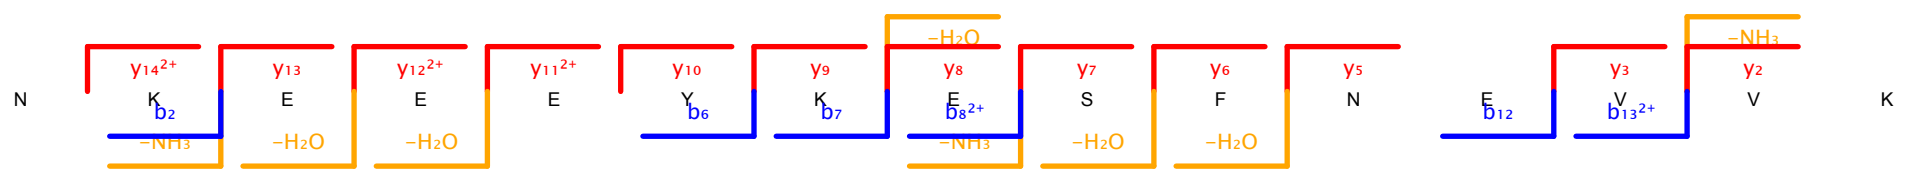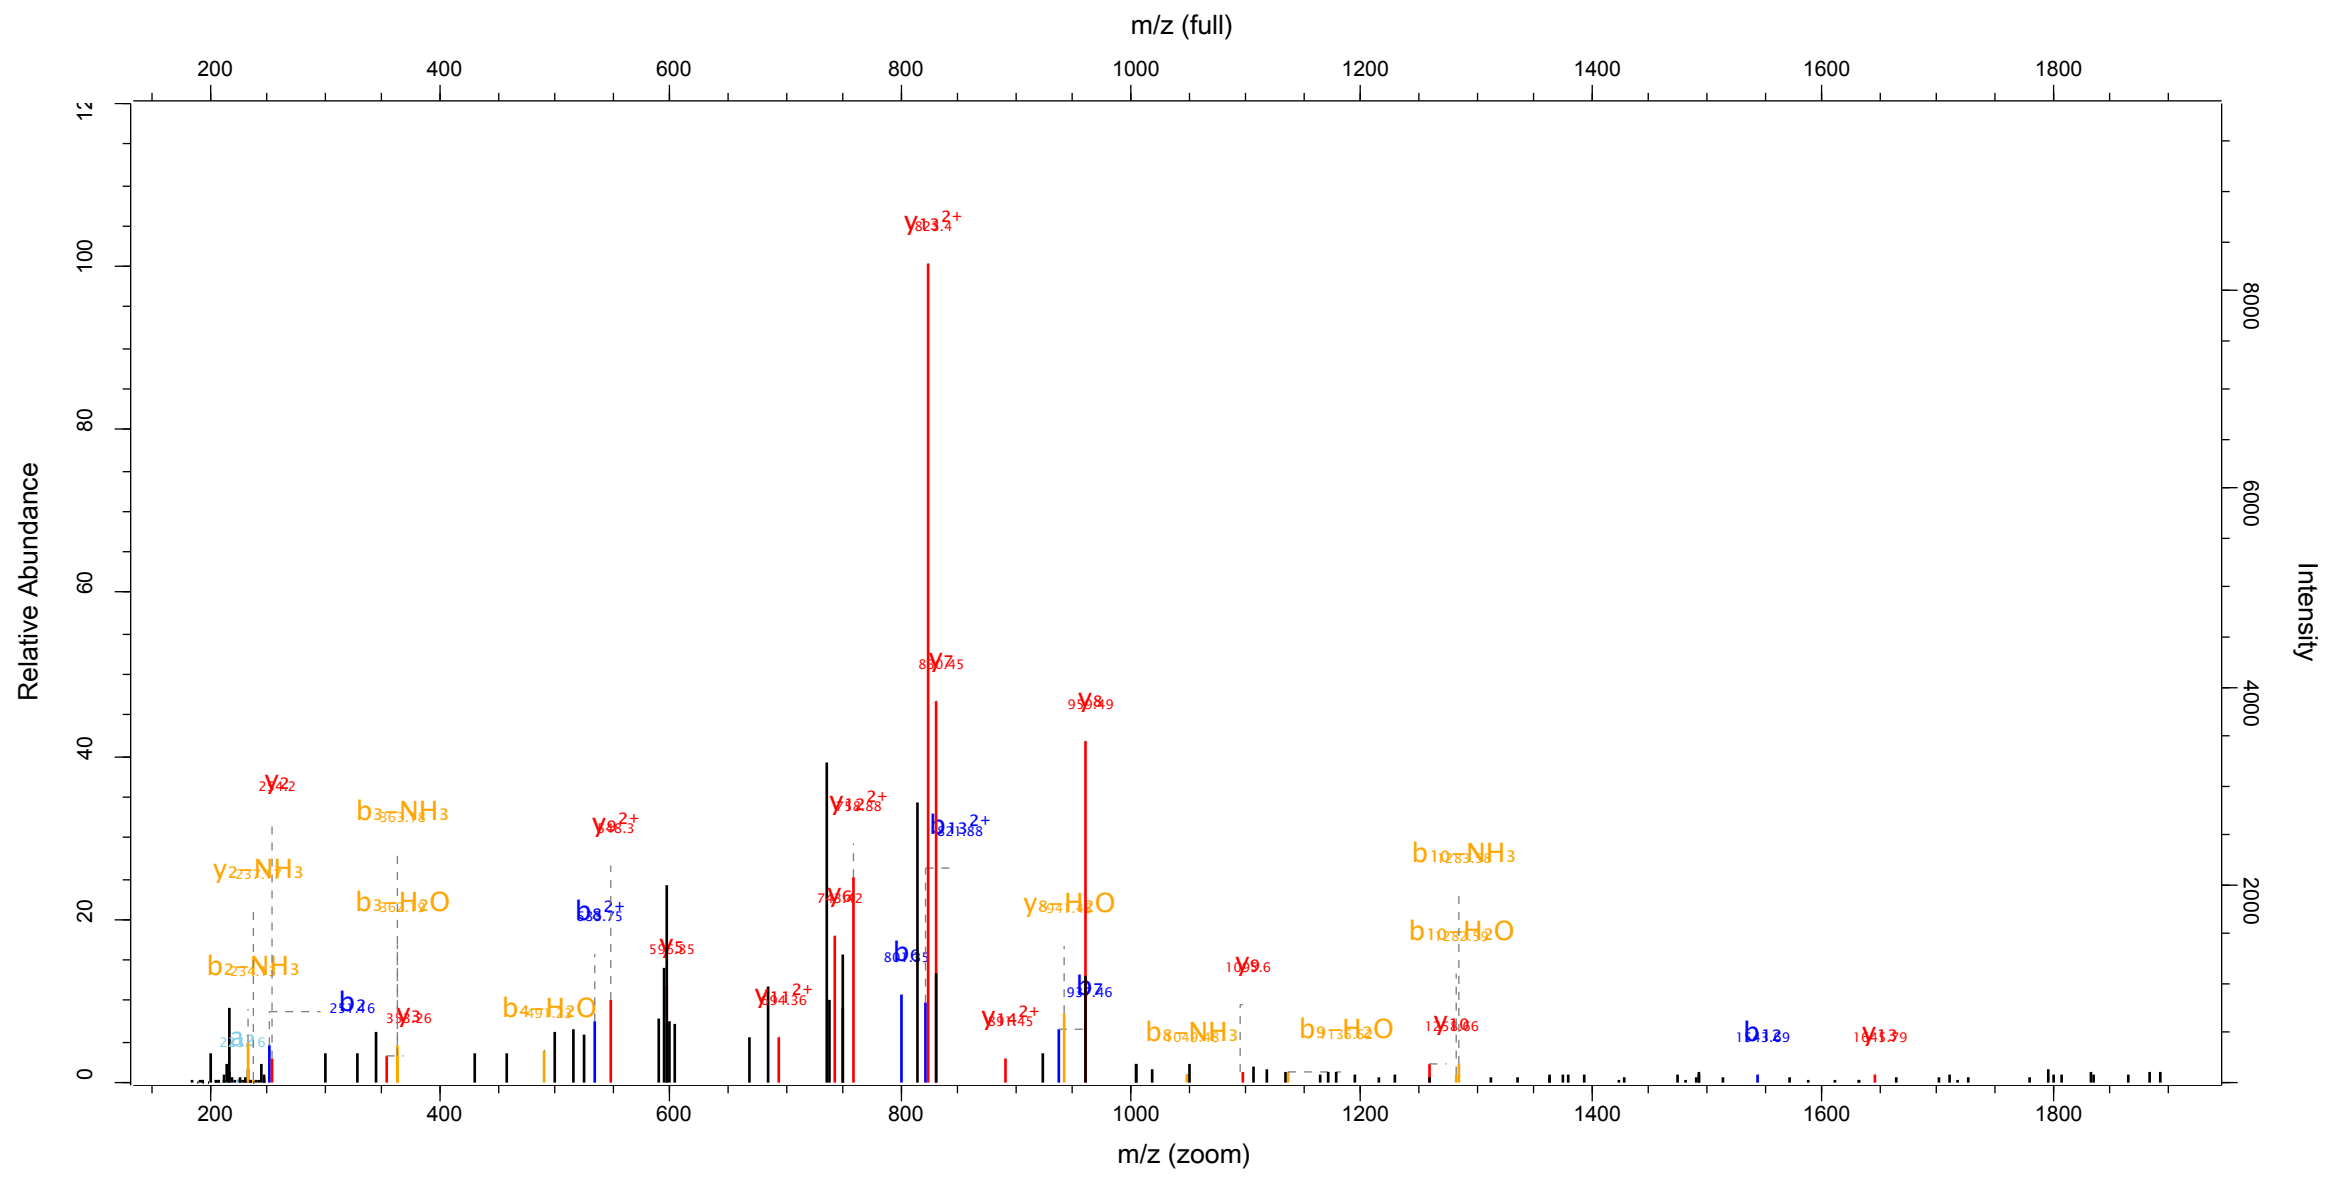

Scan number

21106

Raw file

nak\_UBX2HSAX6\_8feb11\_10

Protein Group 596

Method

ITMS; CID

Pepti...

95.57

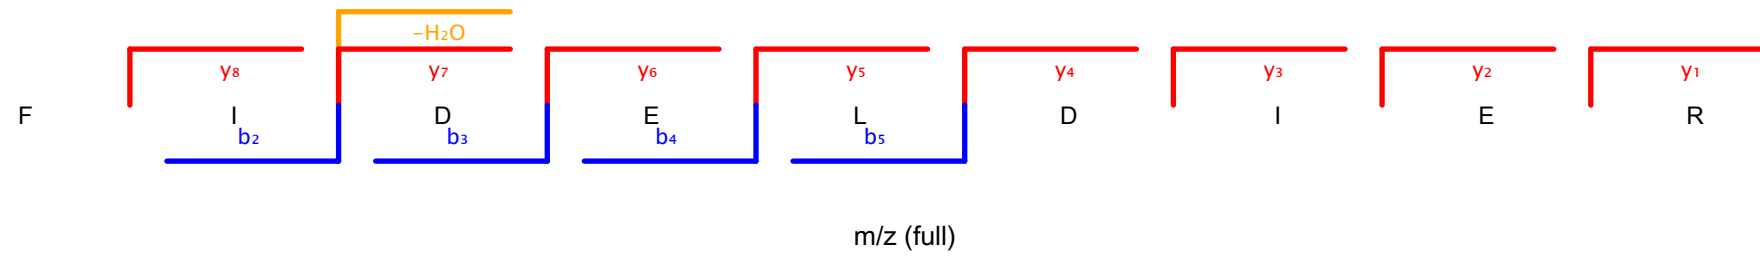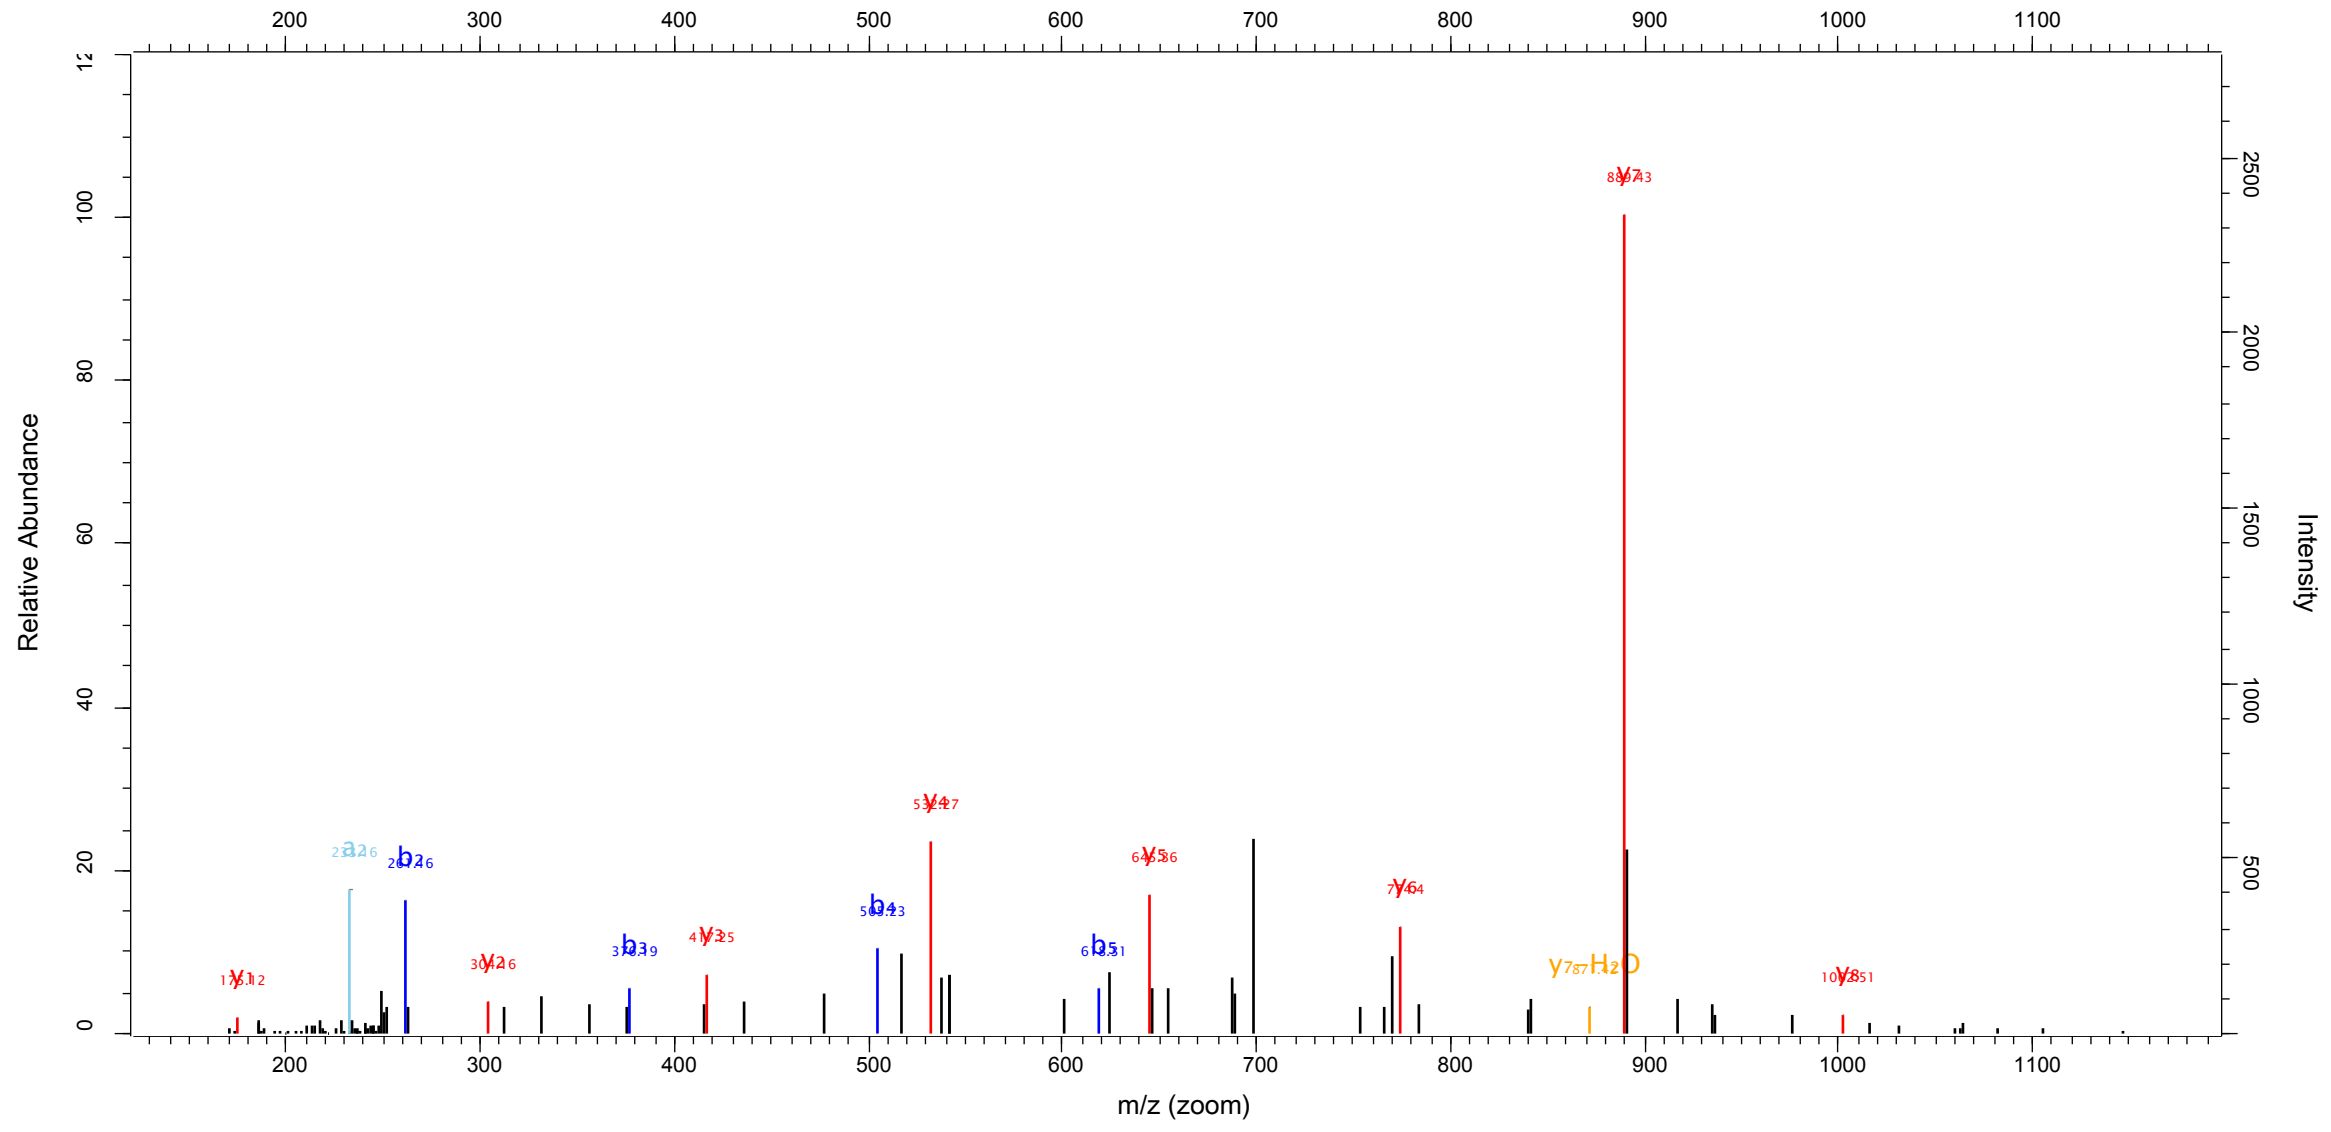

Scan number  
Method

23813  
ITMS; CID

Raw file  
Pepti...

nak\_cdc48UbconjugatesSAX6\_21may17  
186.56

Protein Group 601

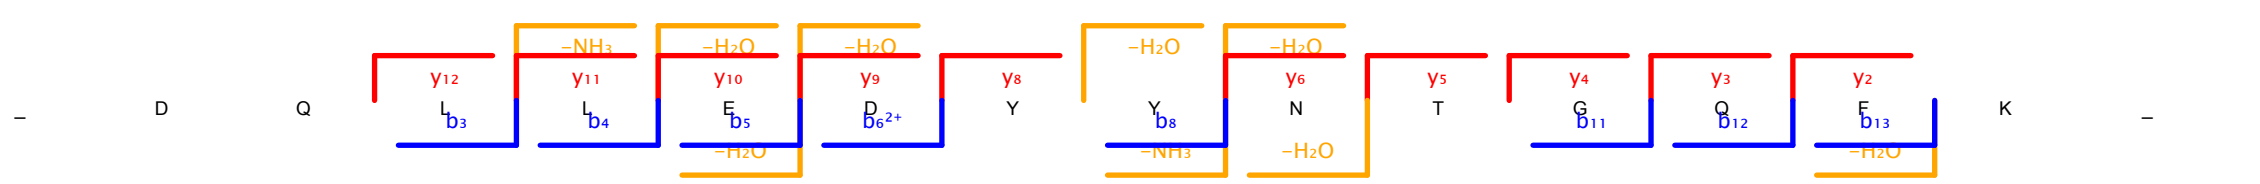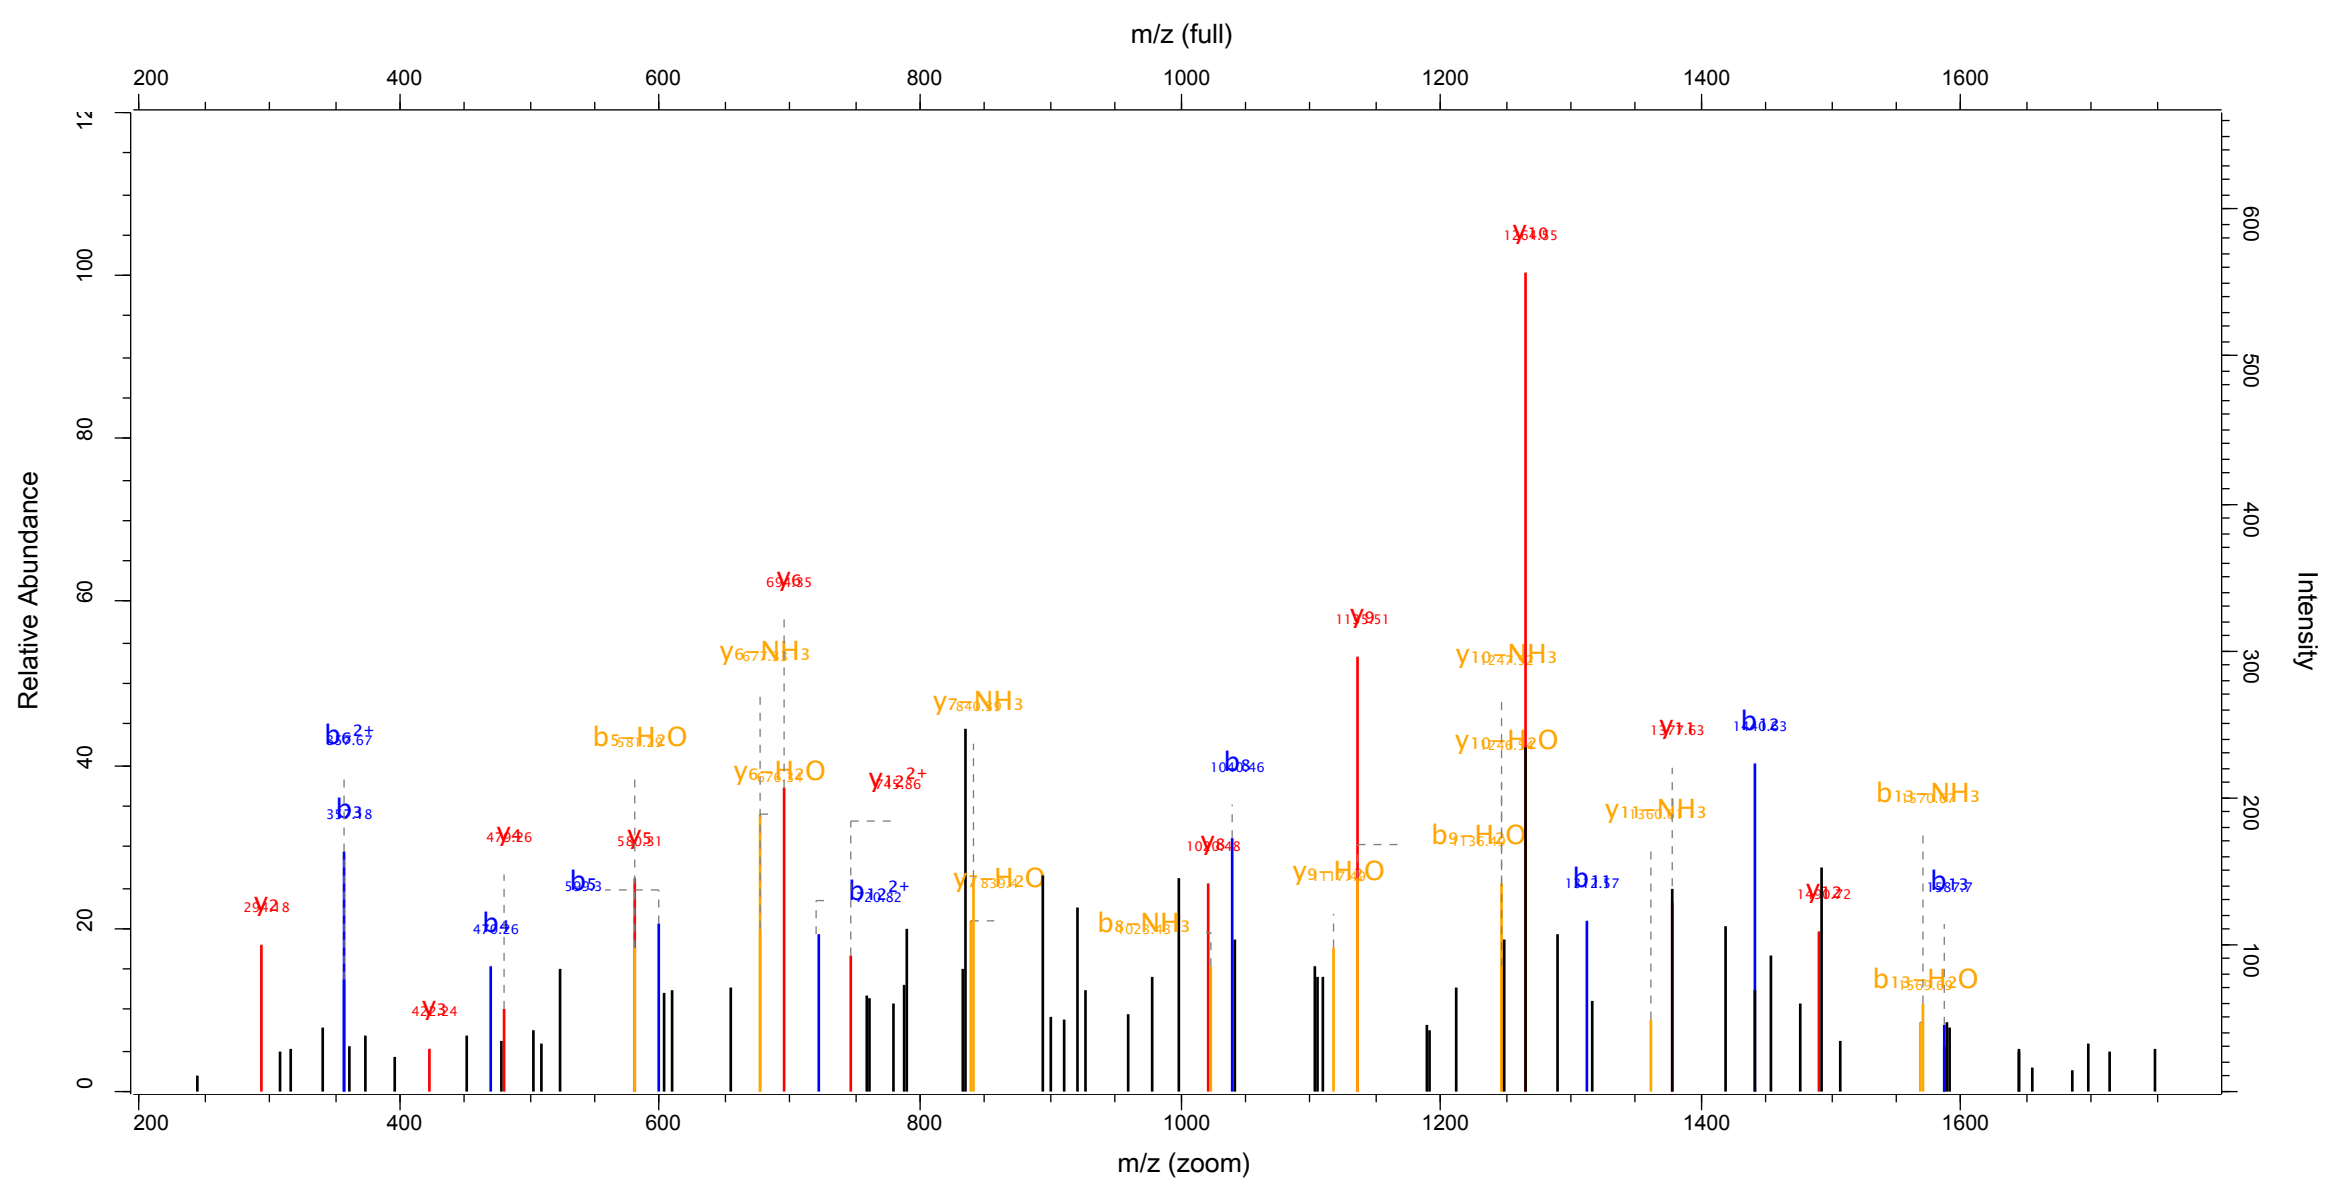

Scan number 31993  
Method ITMS; CID

Raw file nak\_cdc48UbconjugatesSAX5\_21may16  
Pepti... 143.39

Protein Group 602

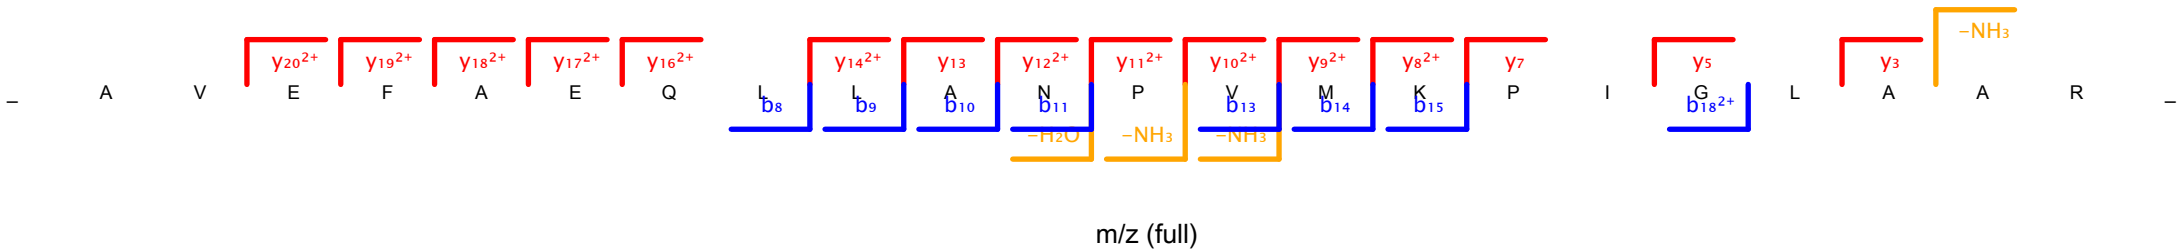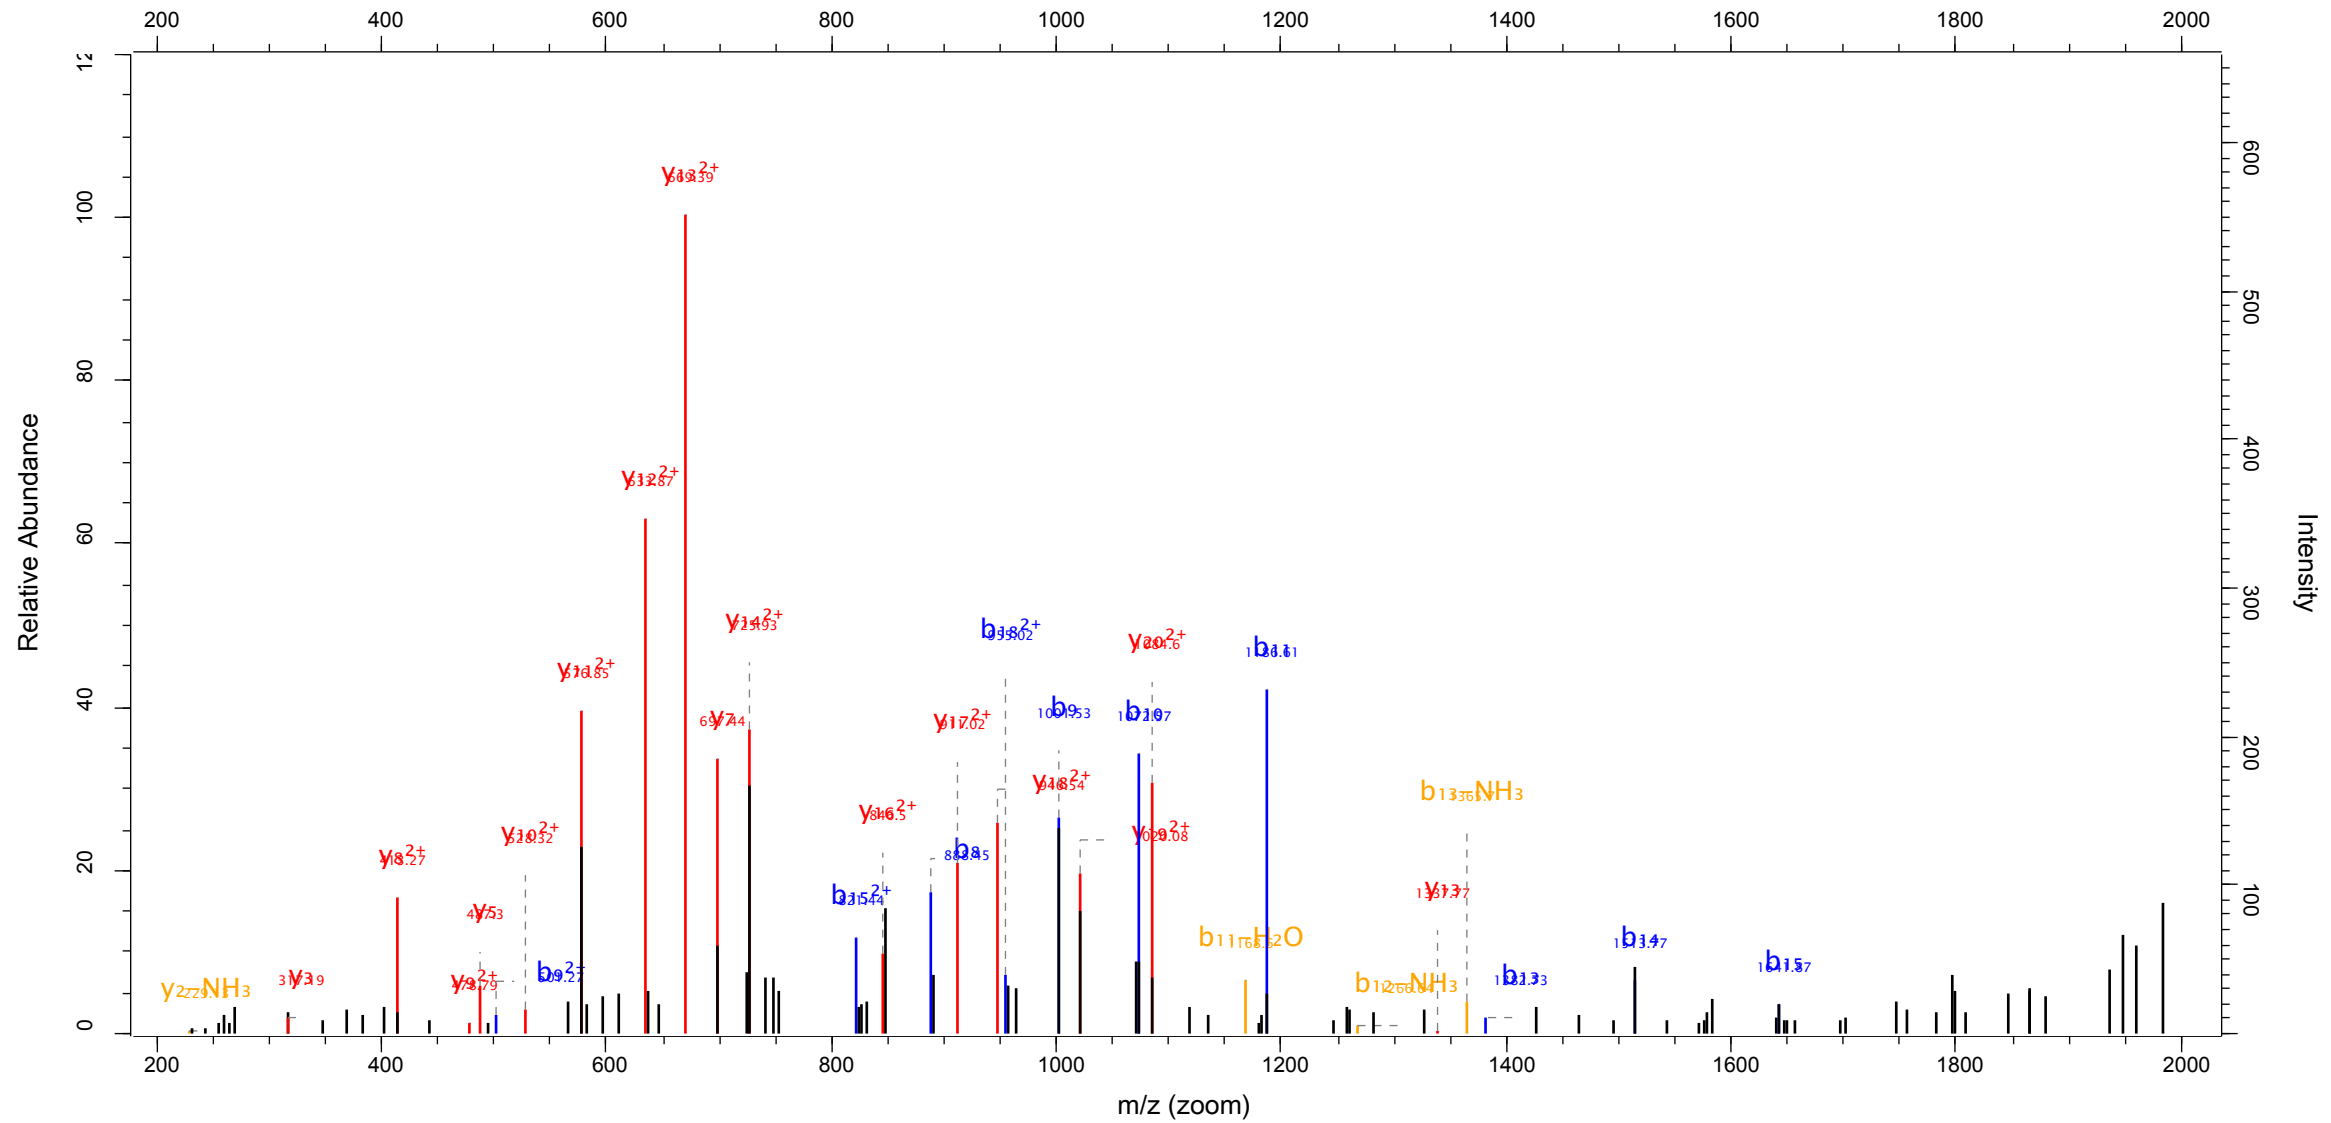

Scan number  
Method

34495  
ITMS; CID

Raw file  
Pepti...

nak\_cdc48UbconjugatesSAX5\_14may10\_09  
133.25

Protein Group 616

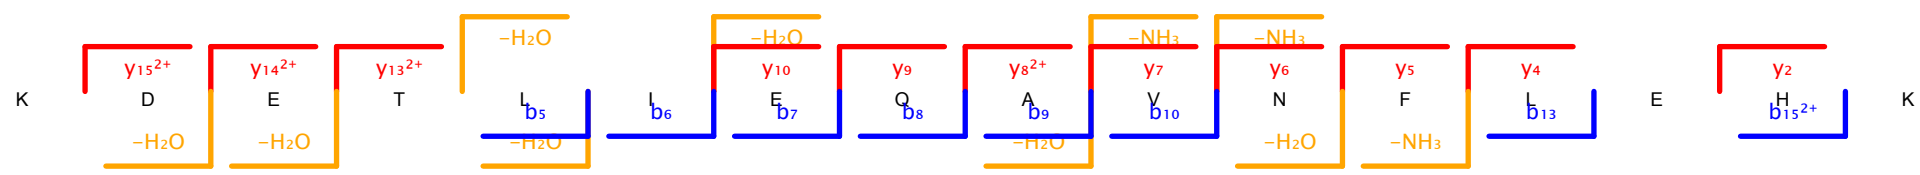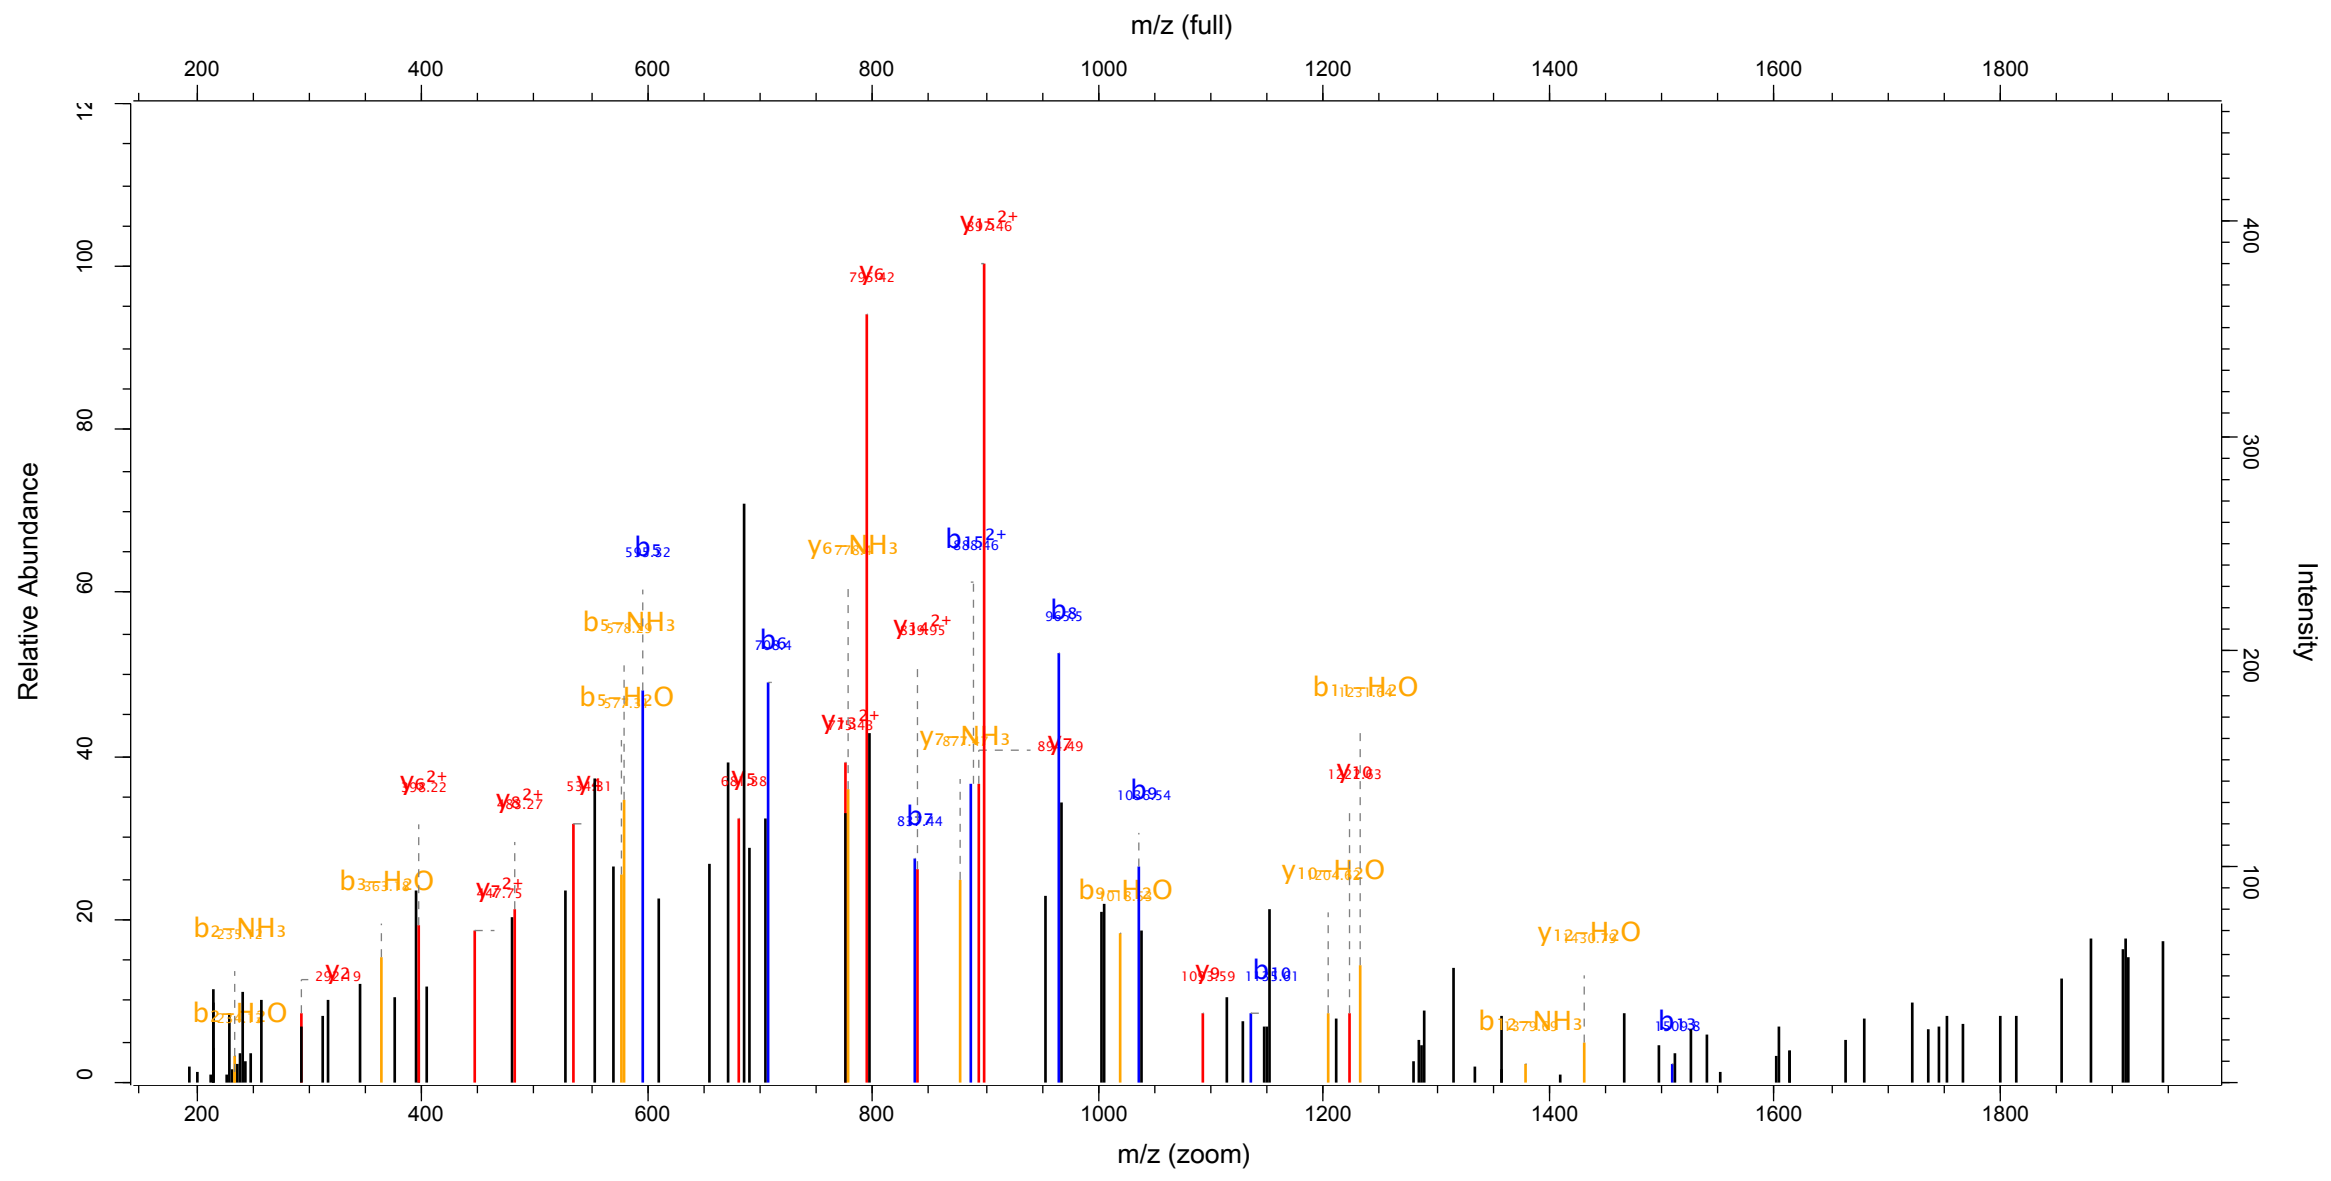

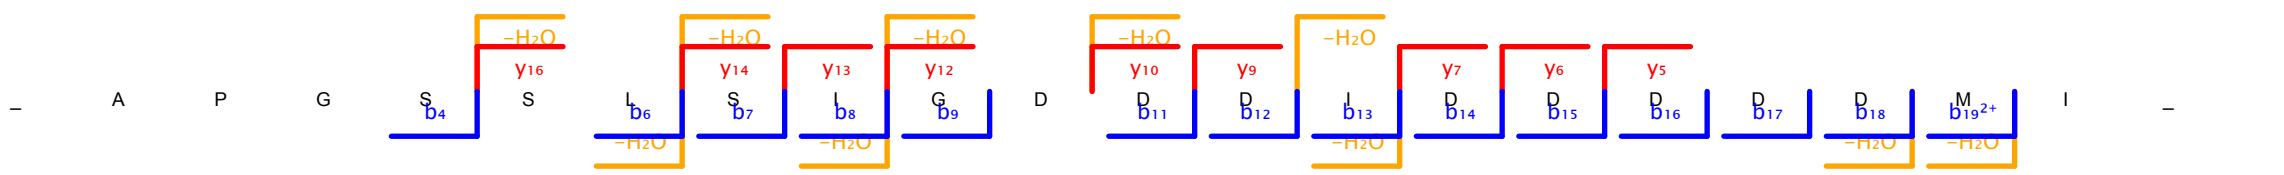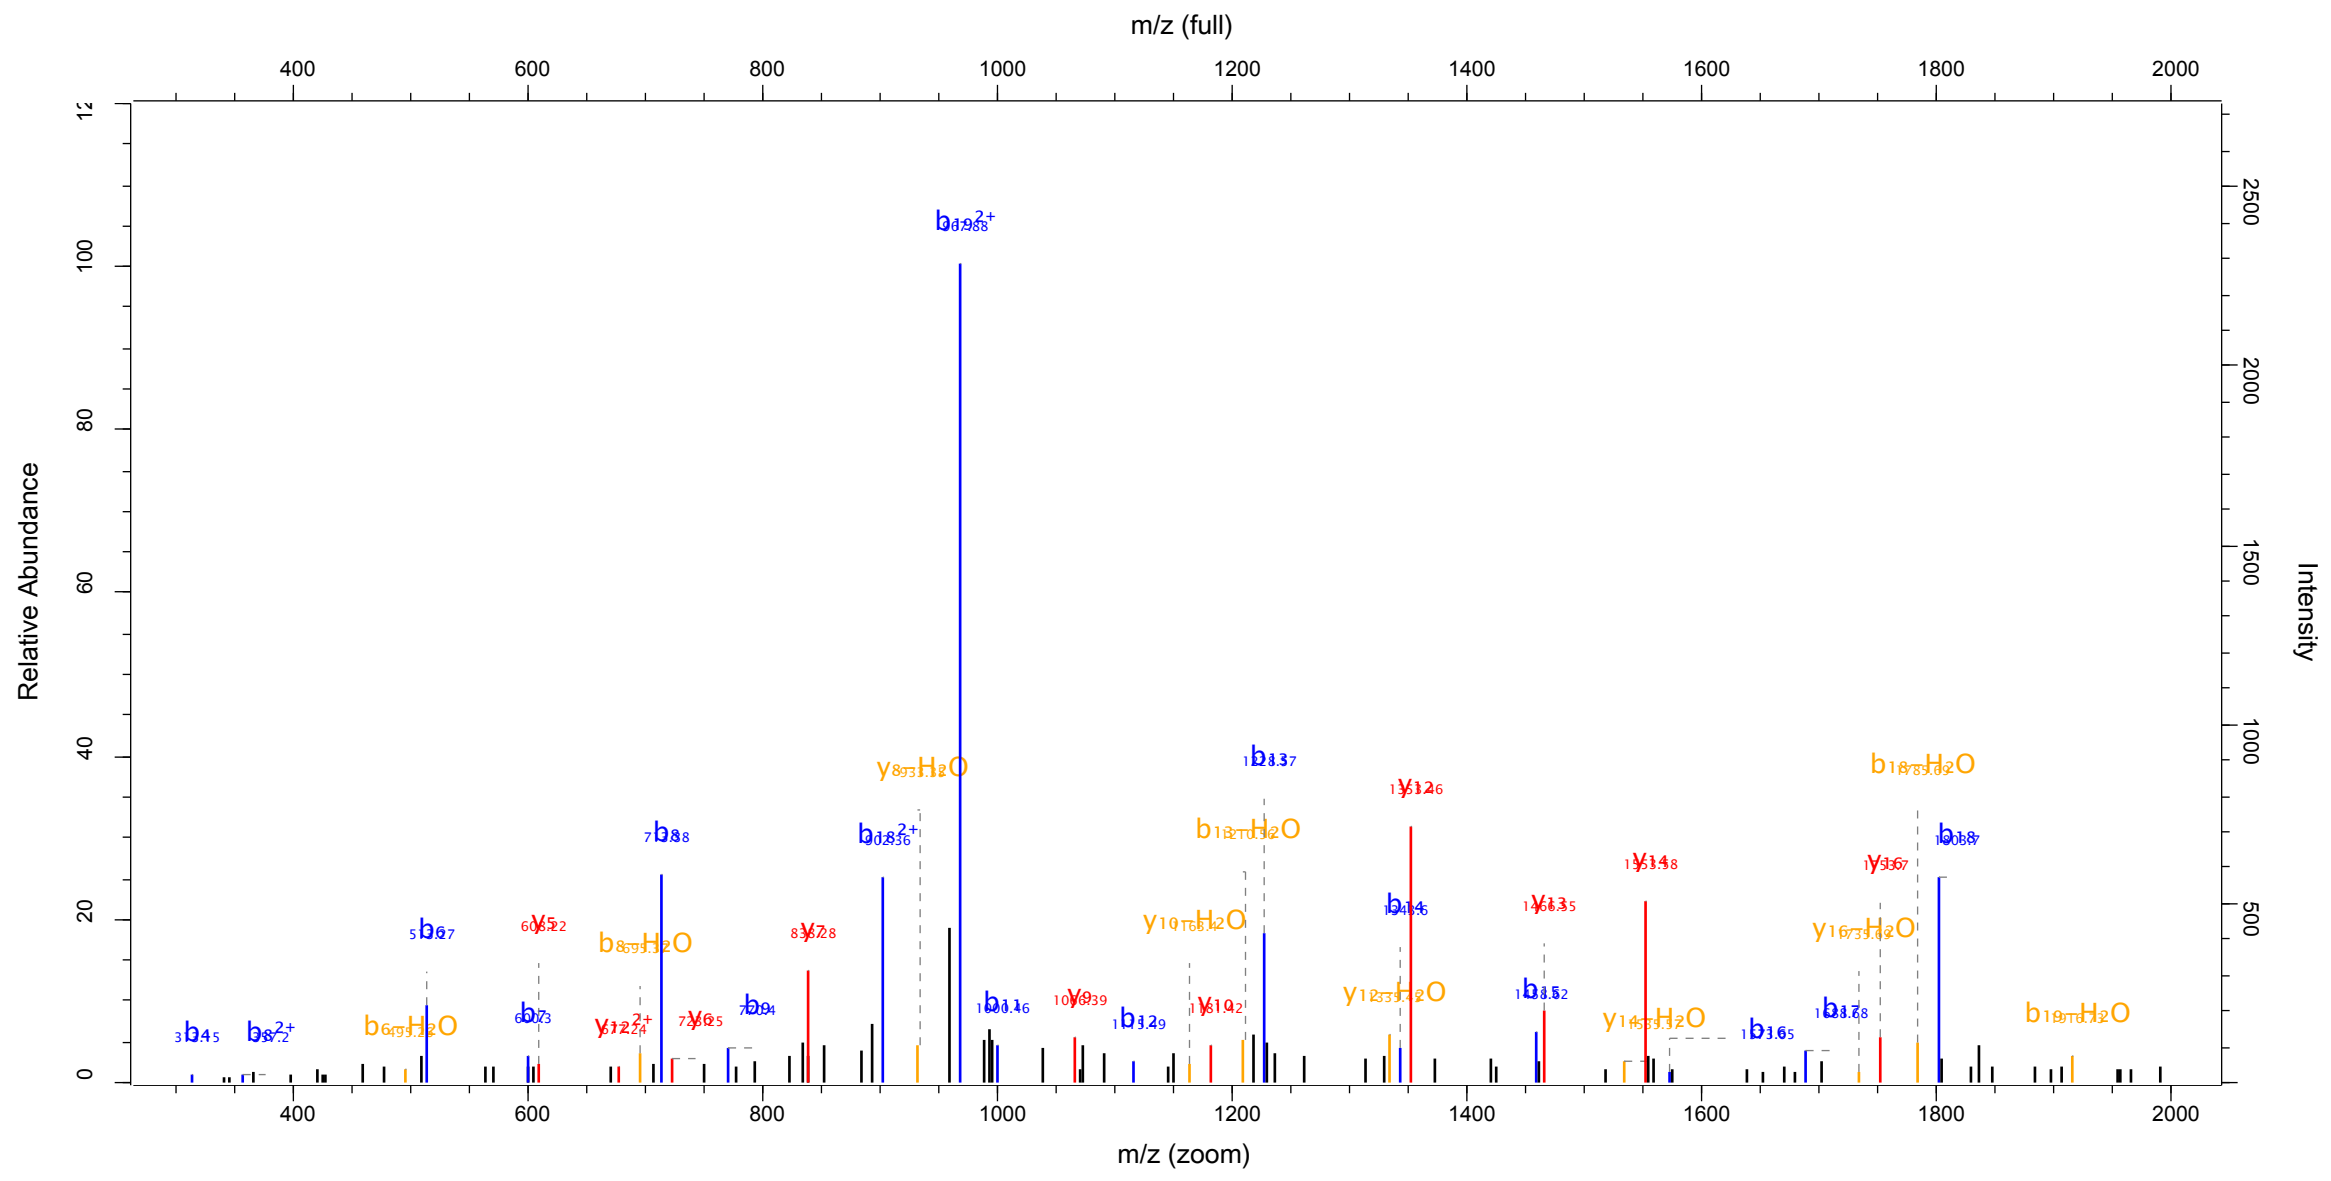



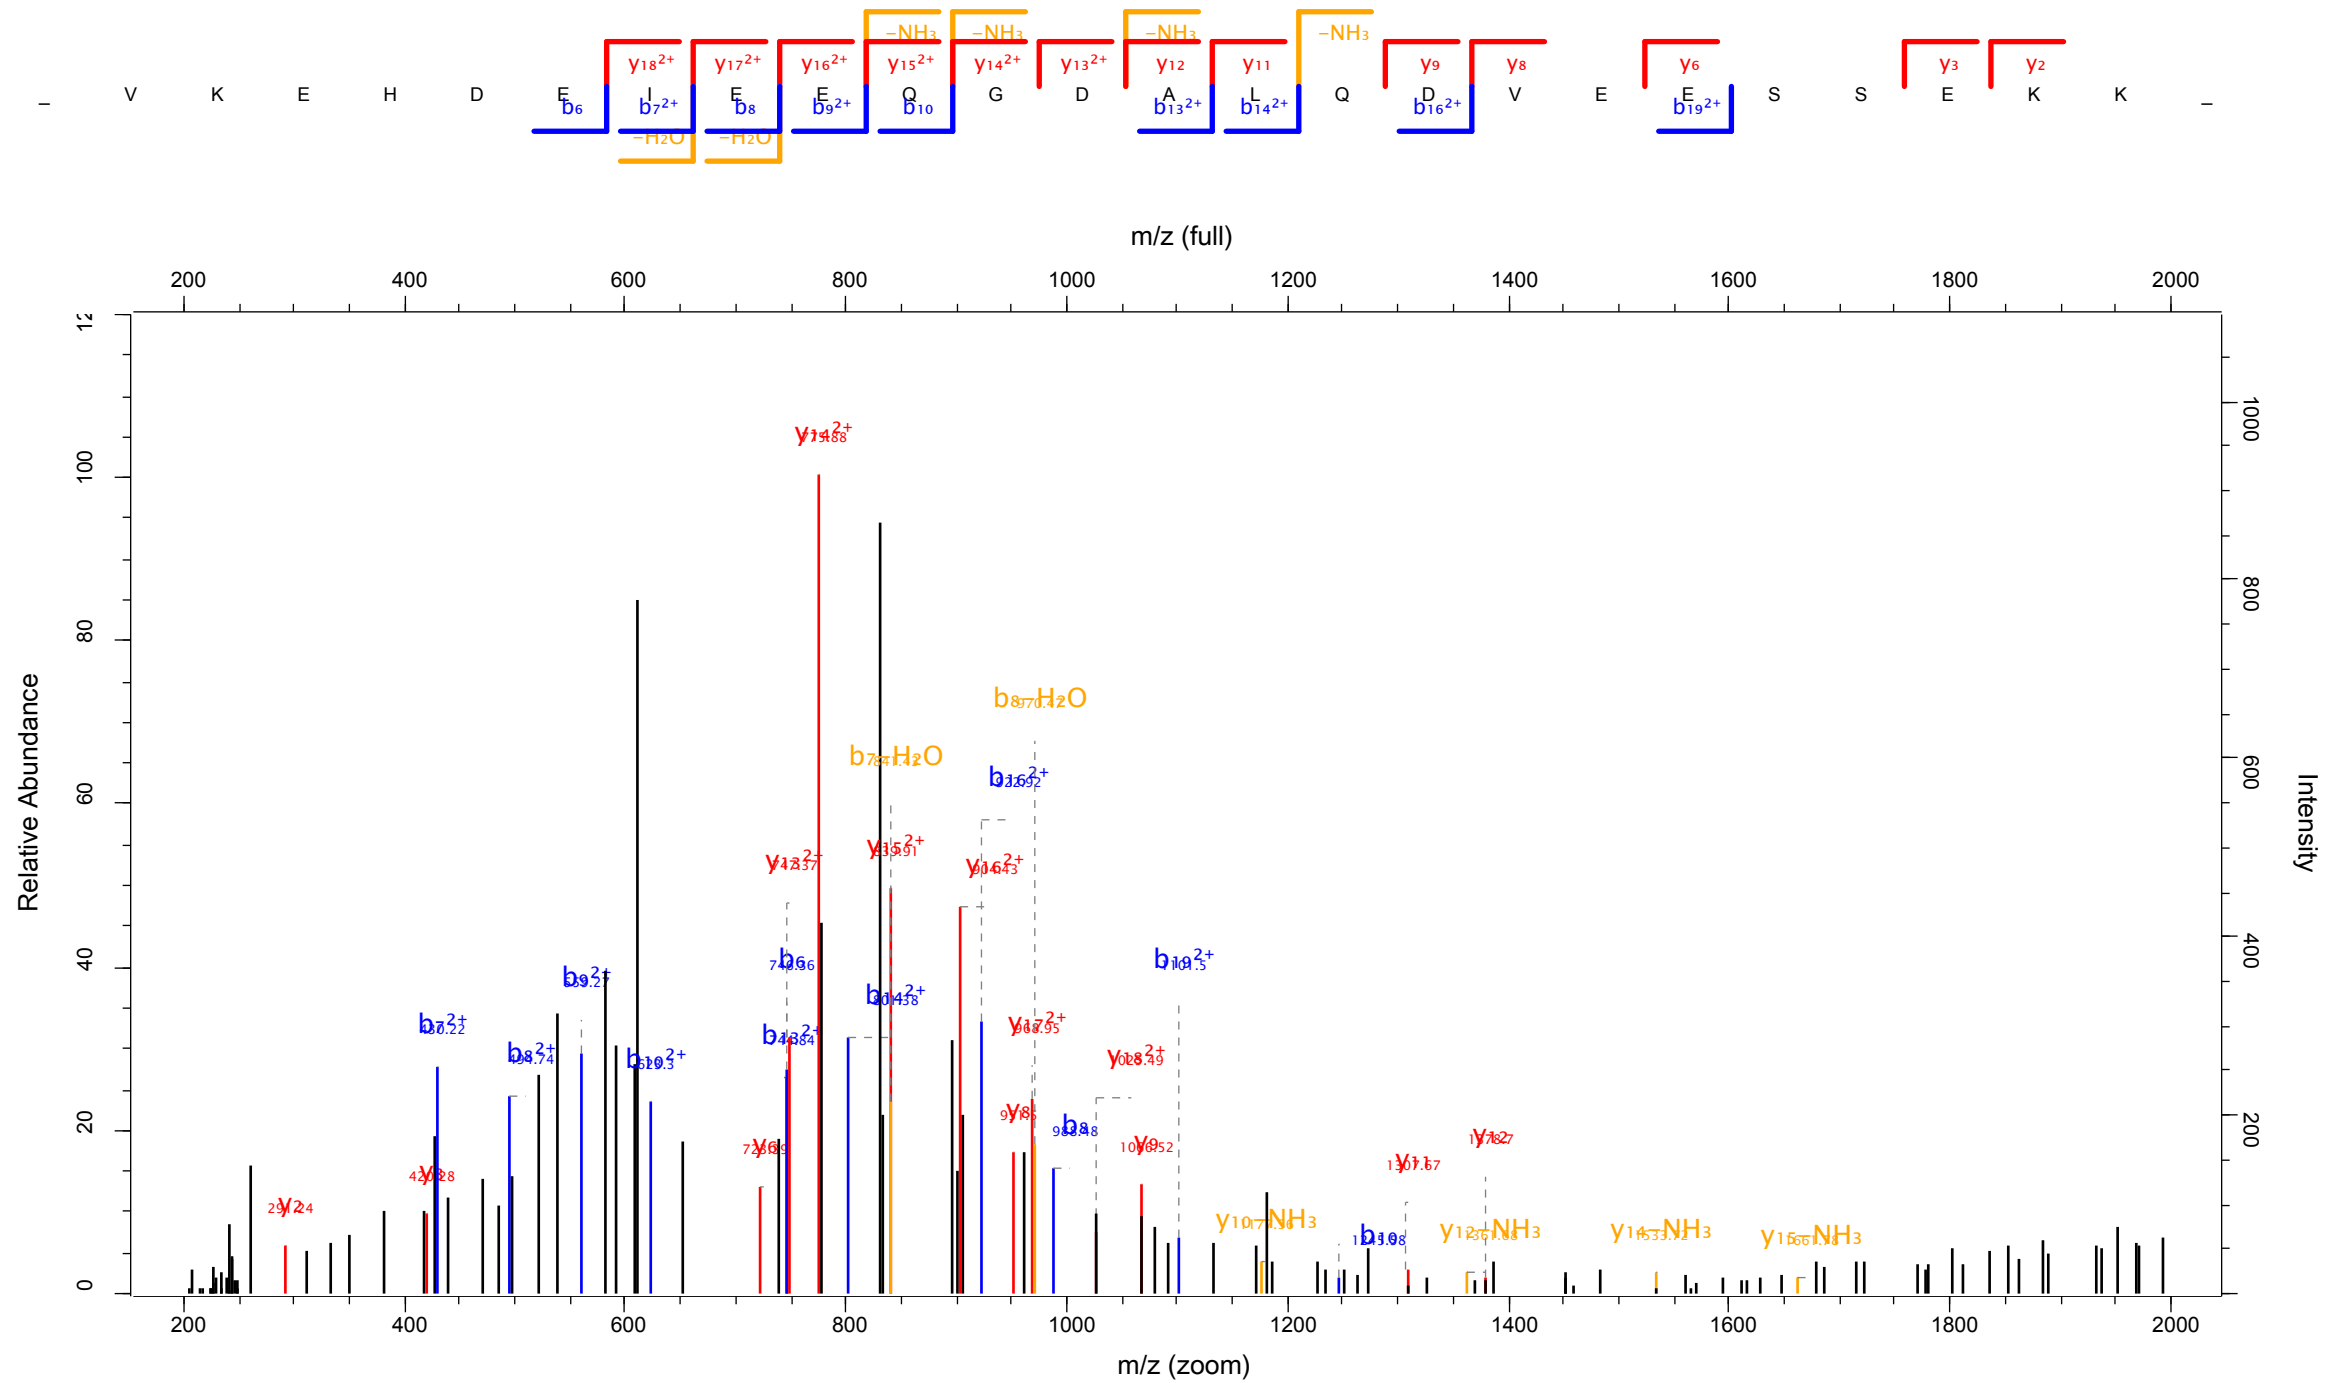

Scan number

15519

Raw file

nak\_ubx4HeavySAX3\_11nov08

Protein Group 660

Method

ITMS; CID

Pepti...

77.12

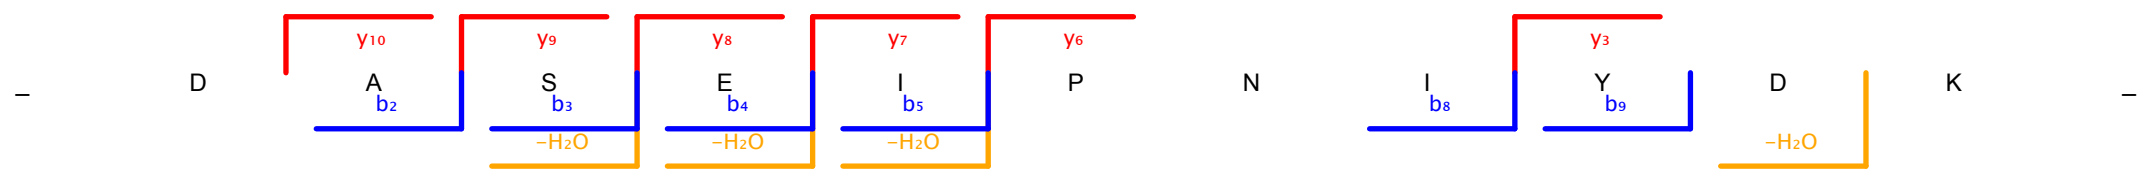

m/z (full)

200 300 400 500 600 700 800 900 1000 1100 1200

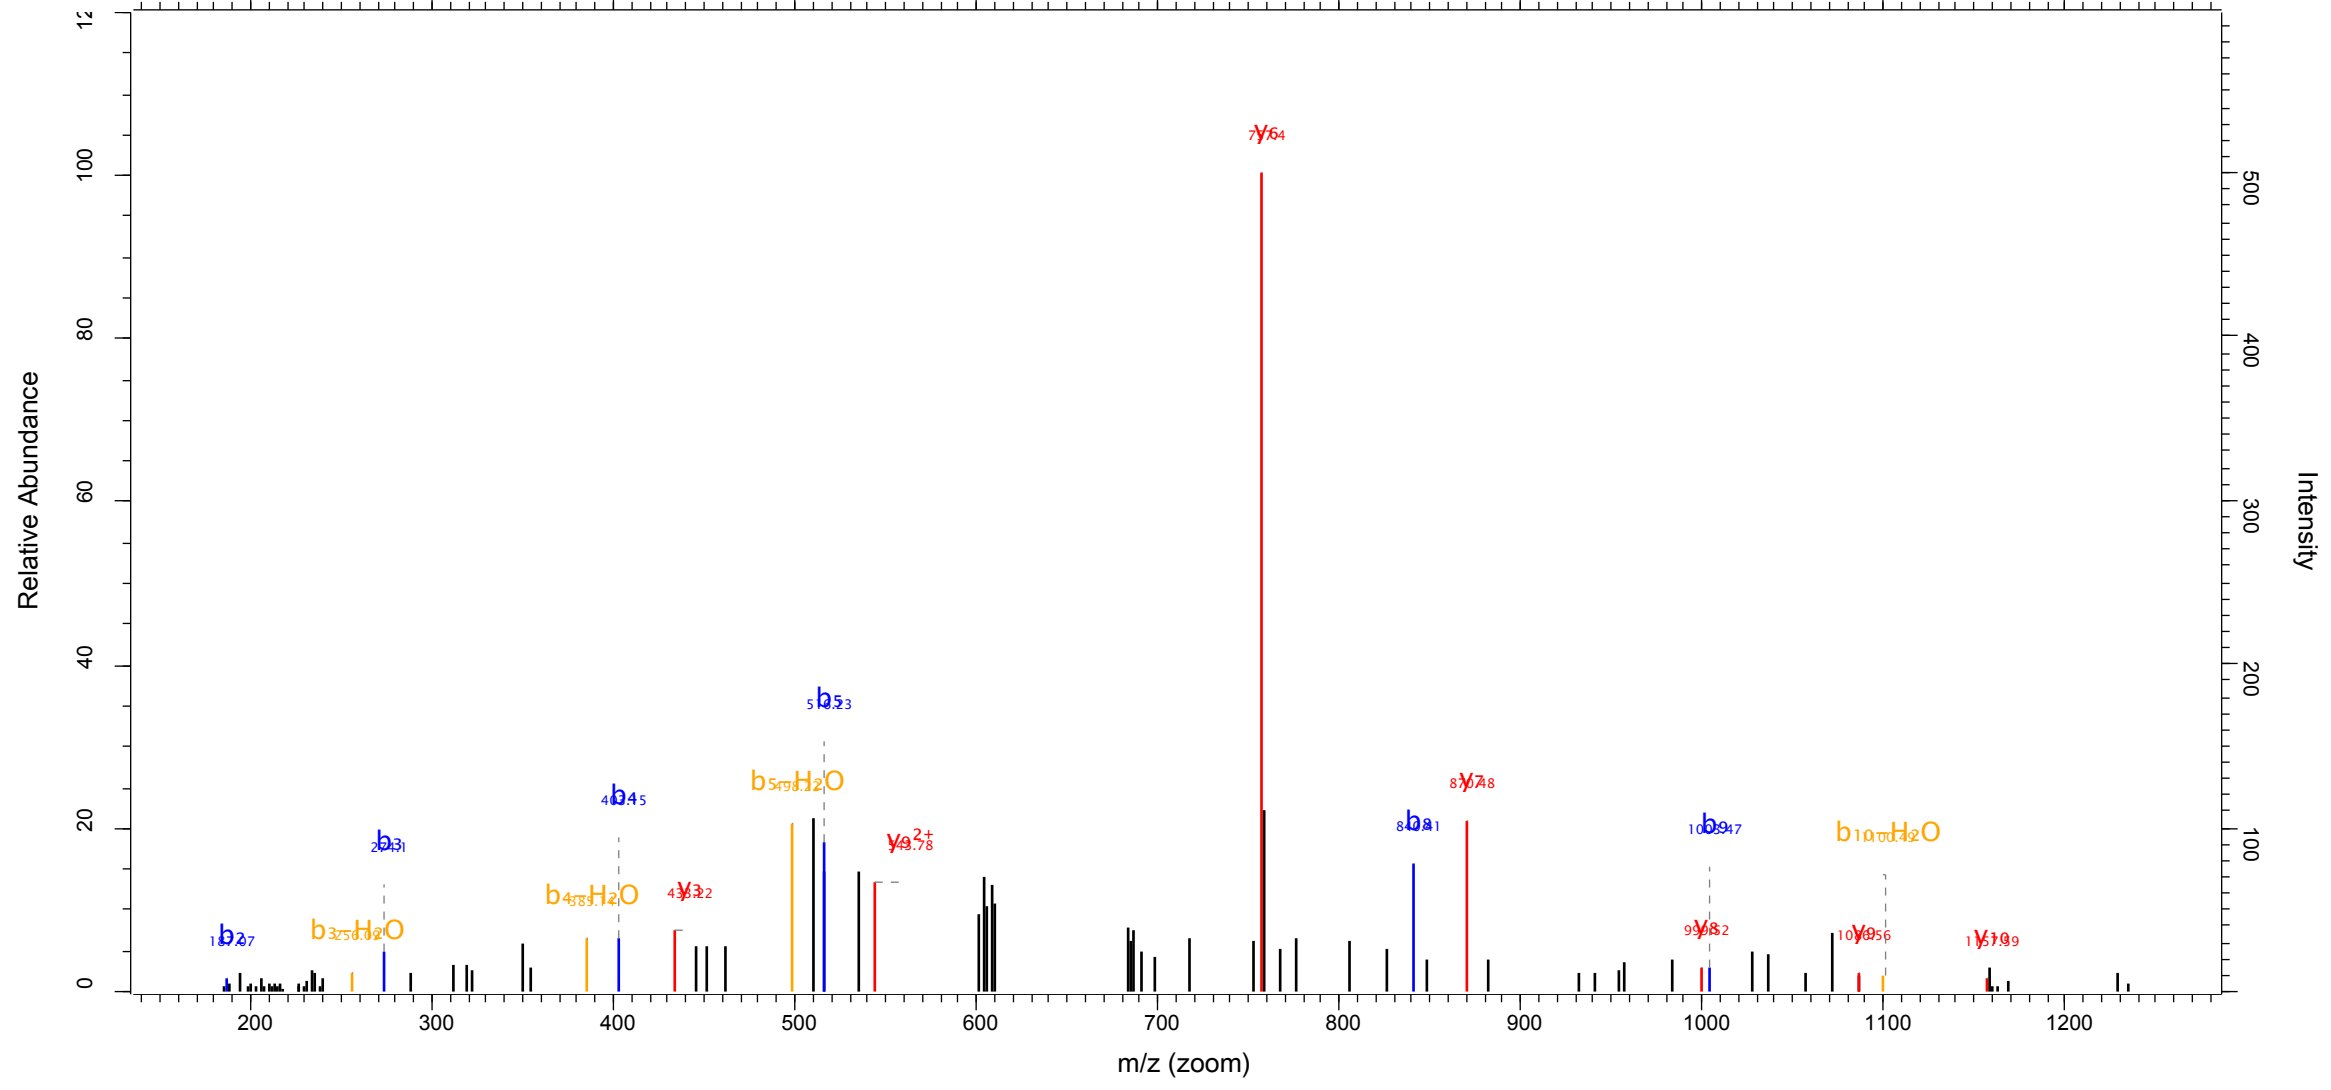

Scan number

25948

Raw file

nak\_ubx4LightSAX4\_11 nov04

Protein Group 664

Method

ITMS; CID

Pepti...

90.69

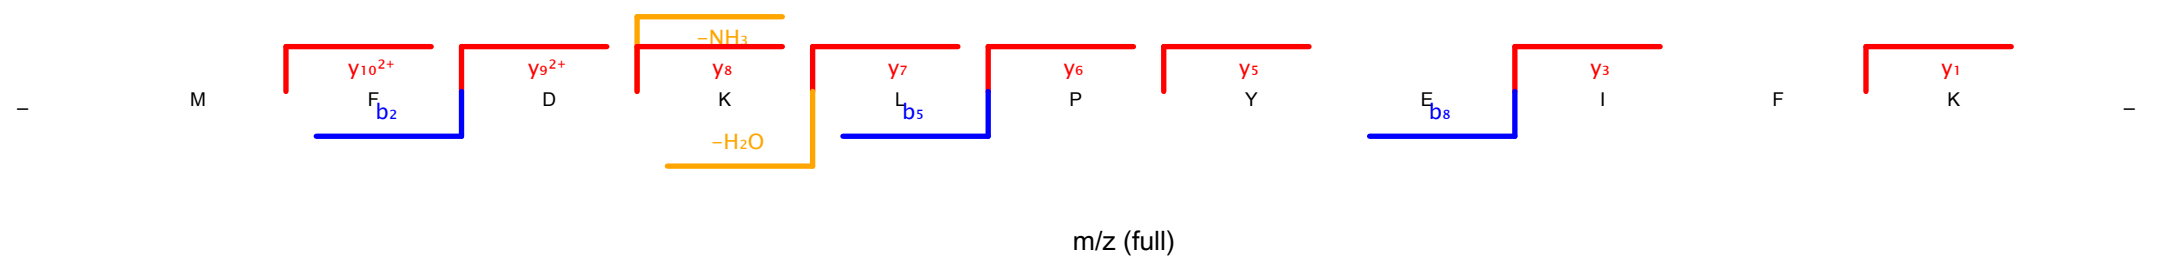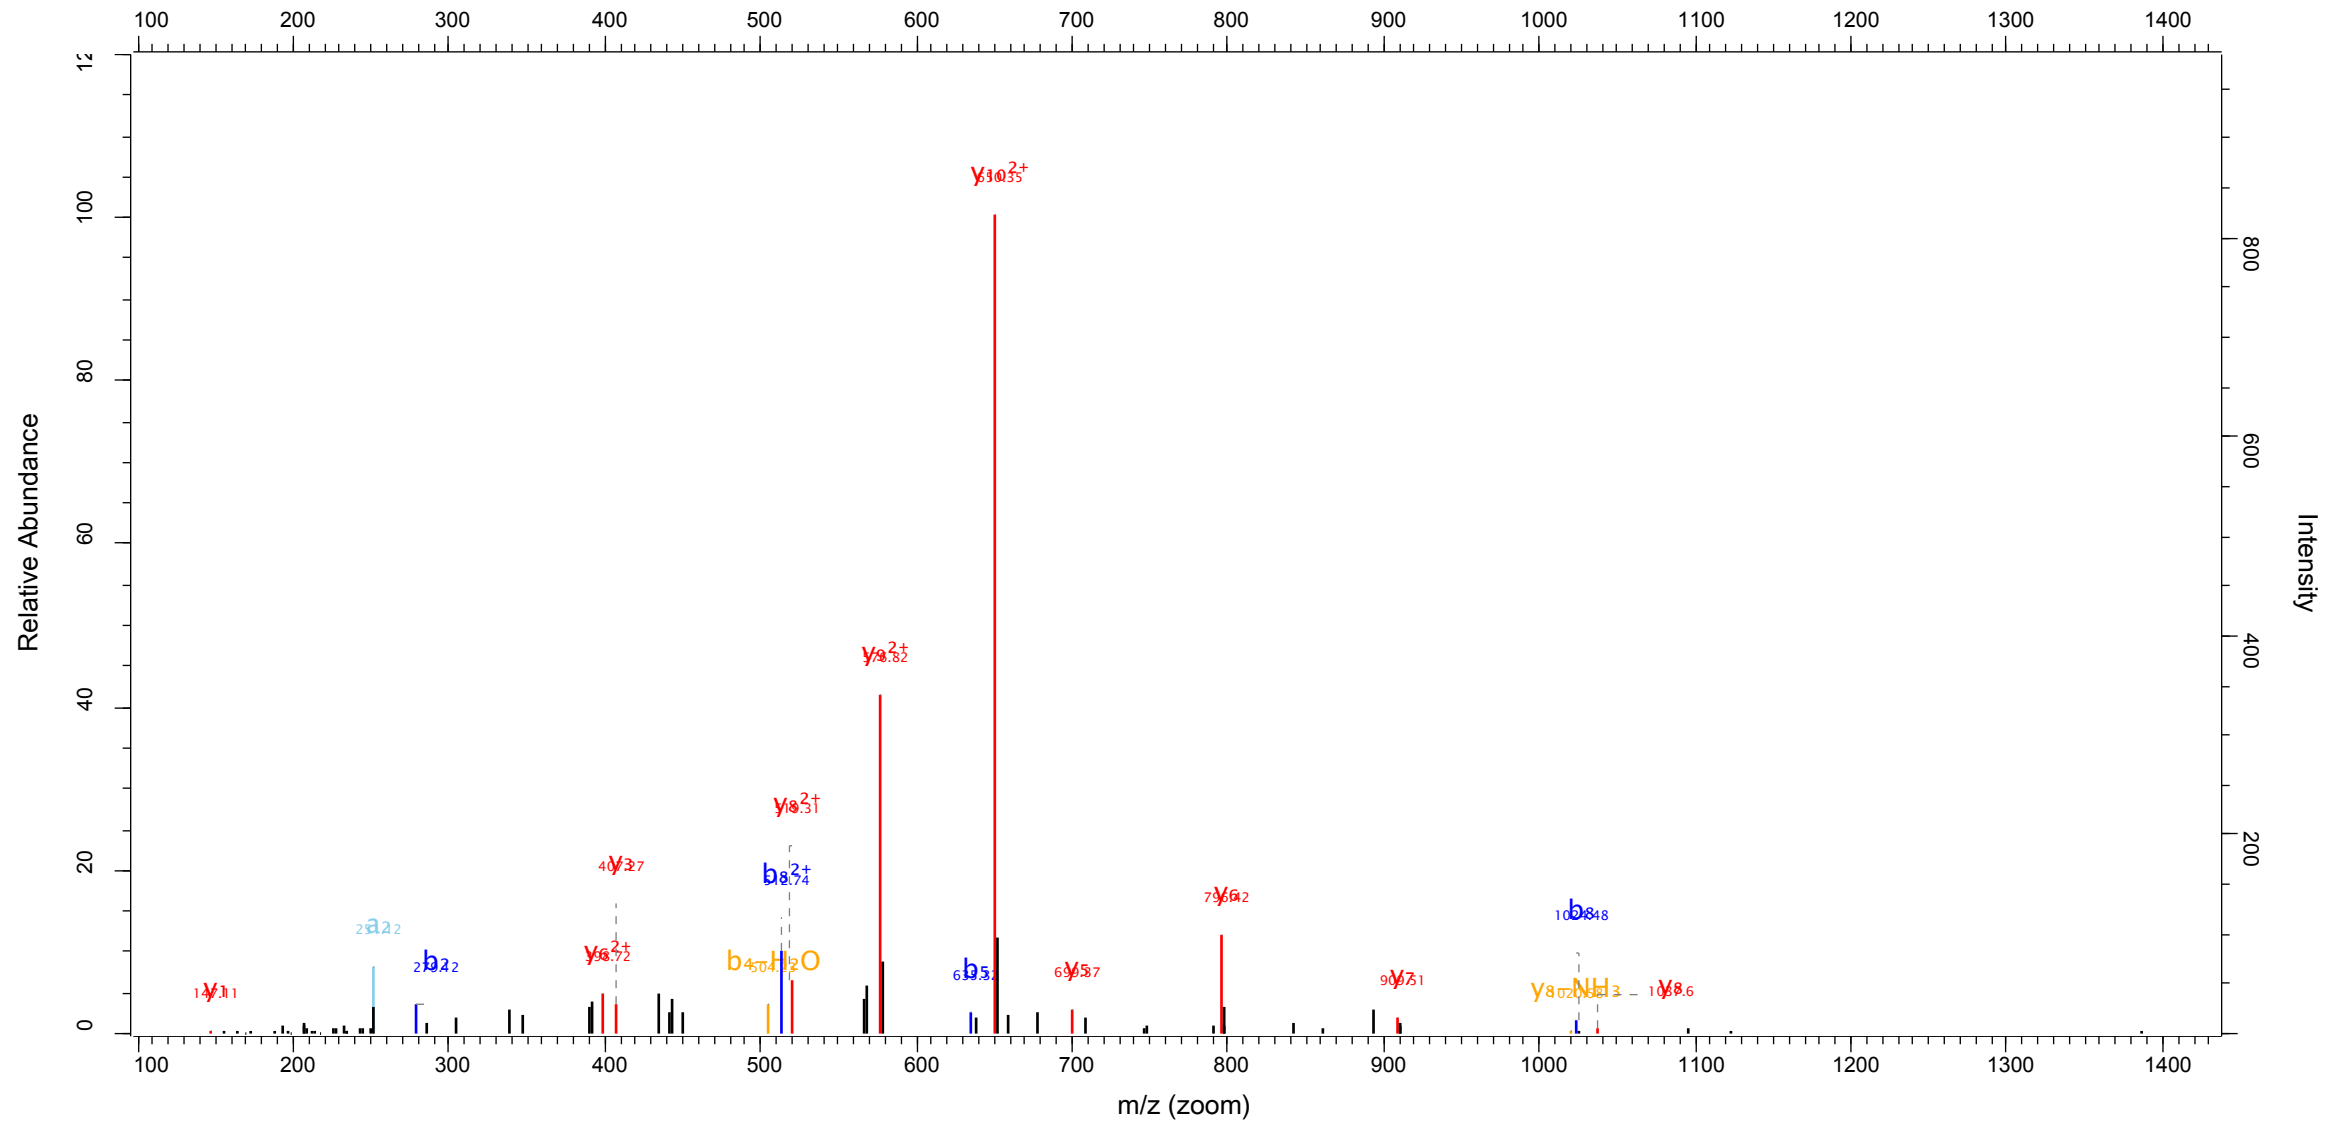

Scan number 33747 Raw file nak\_ubx4LightSAX2\_11 nov02  
 Method ITMS; CID Pepti... 91.62

Protein Group 672

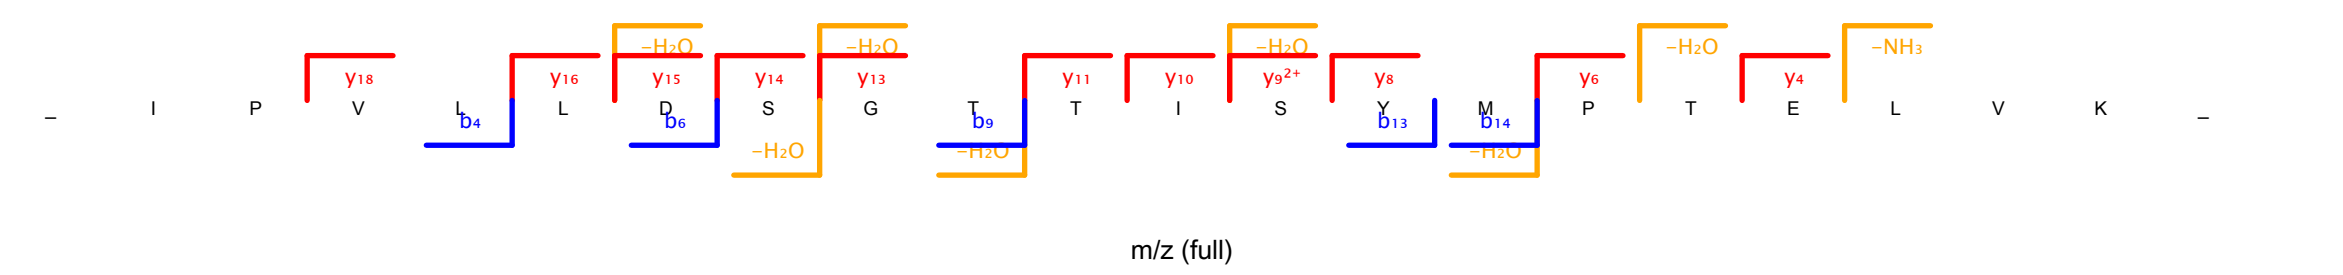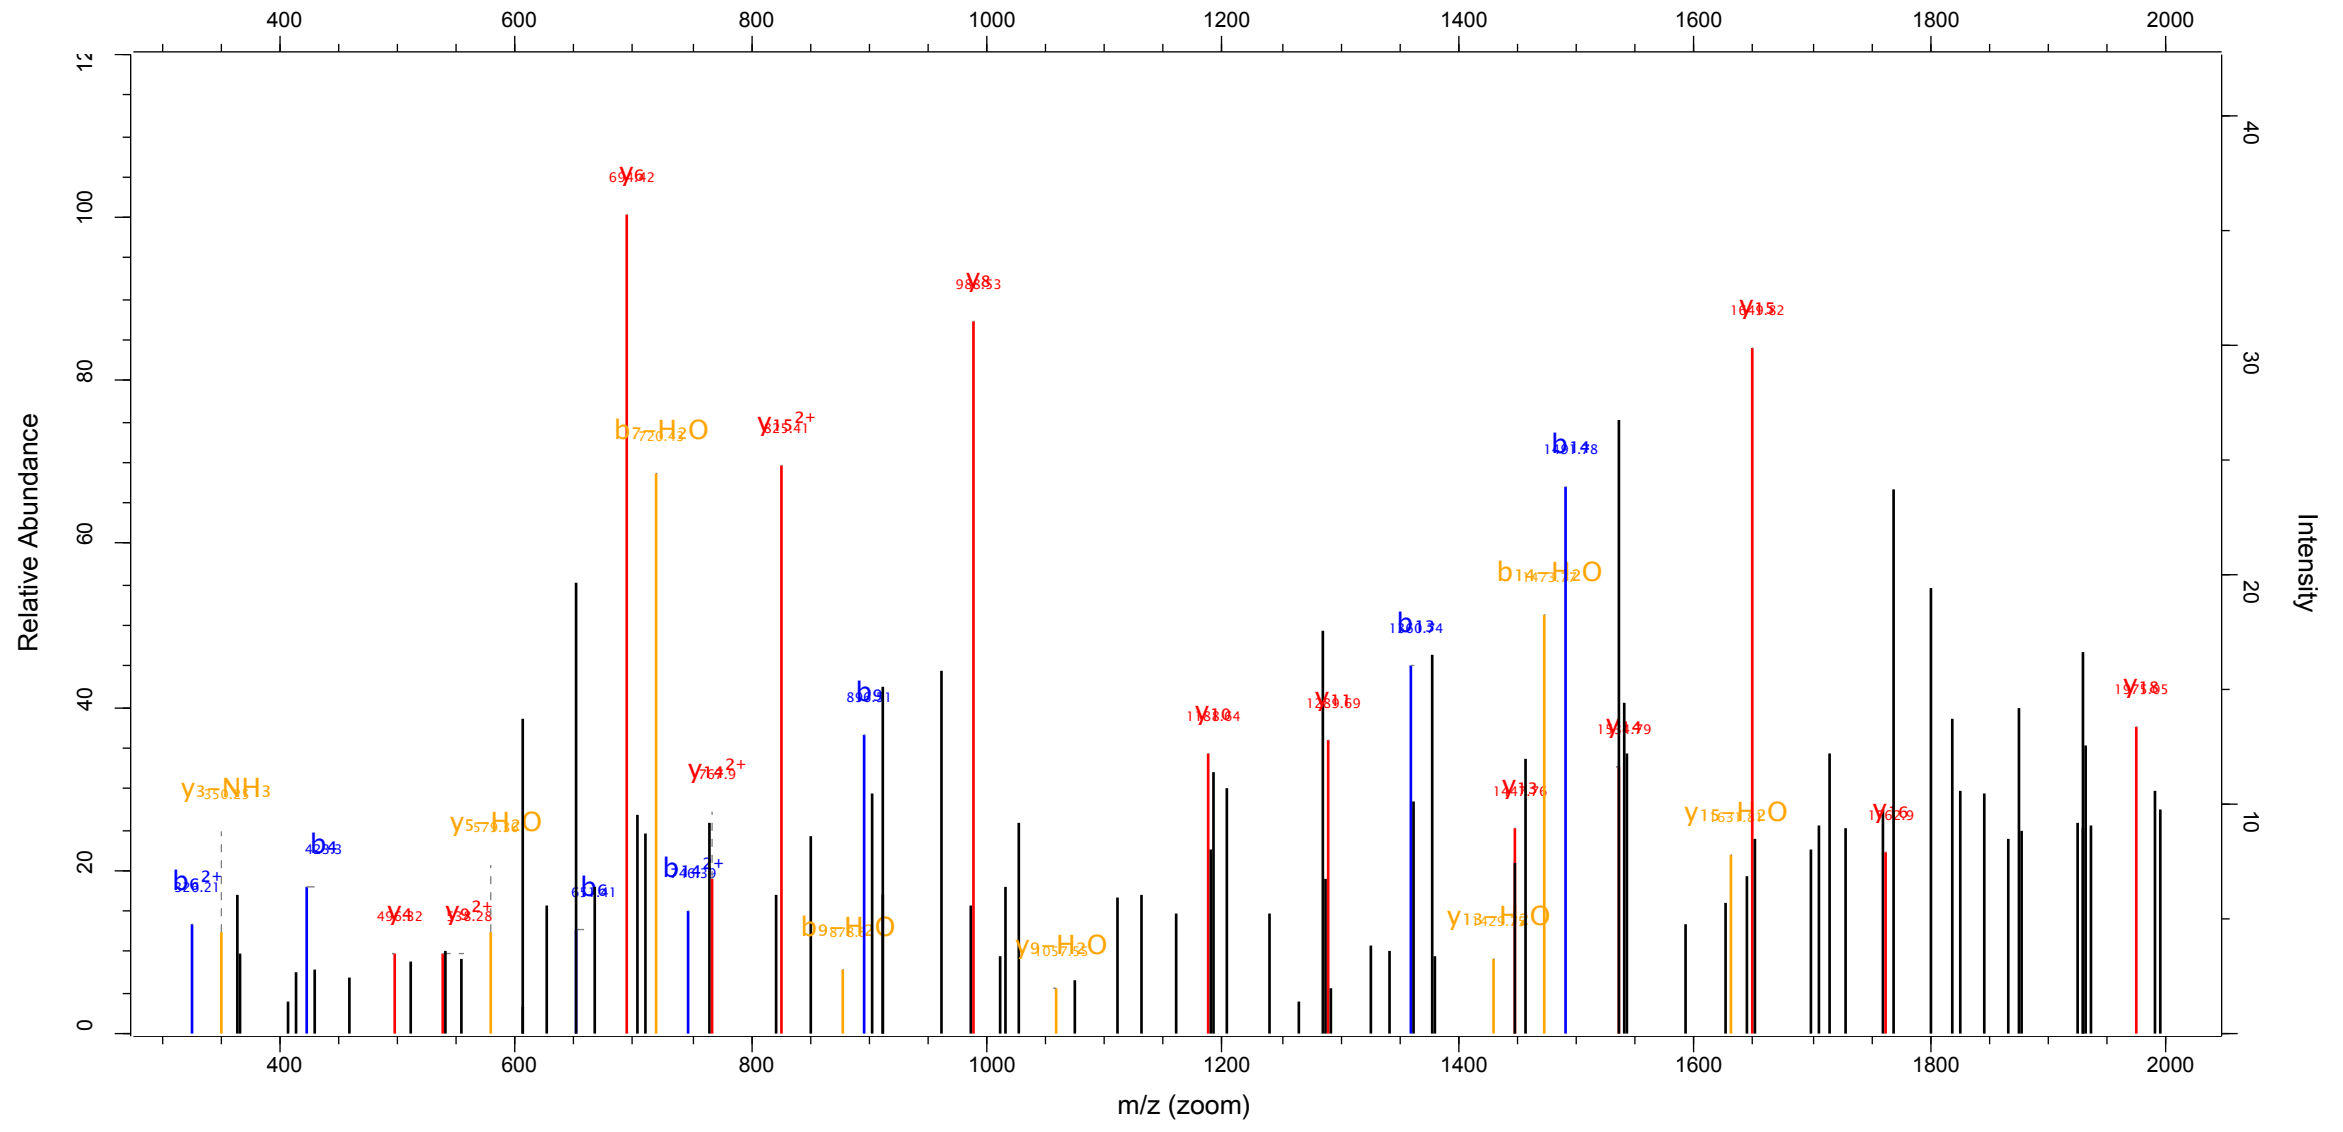

Scan number  
Method

16833  
ITMS; CID

Raw file  
Pepti...

nak\_ubx4LightSAX3\_11 nov03  
105.2

Protein Group 696

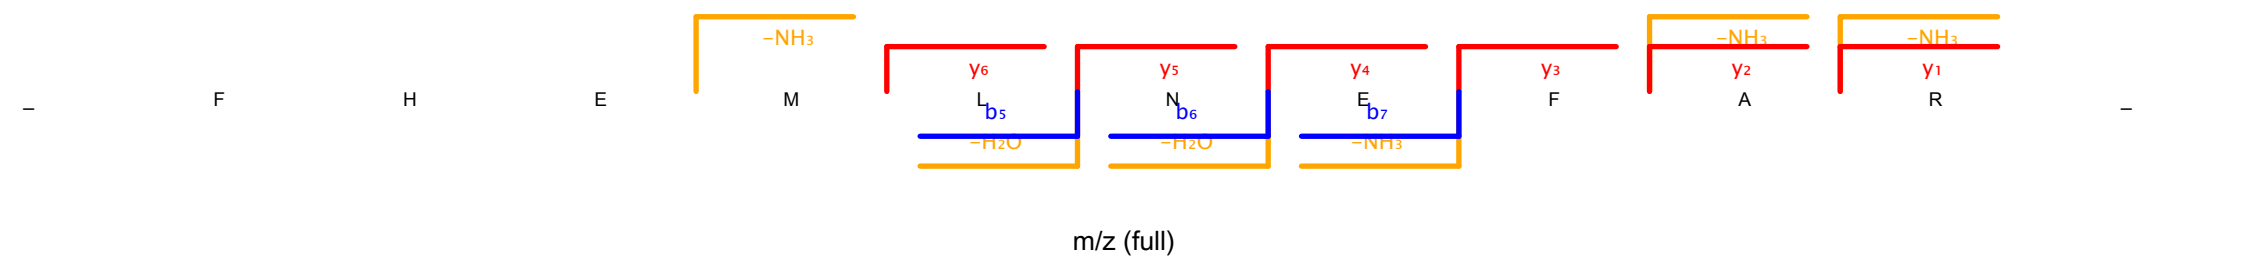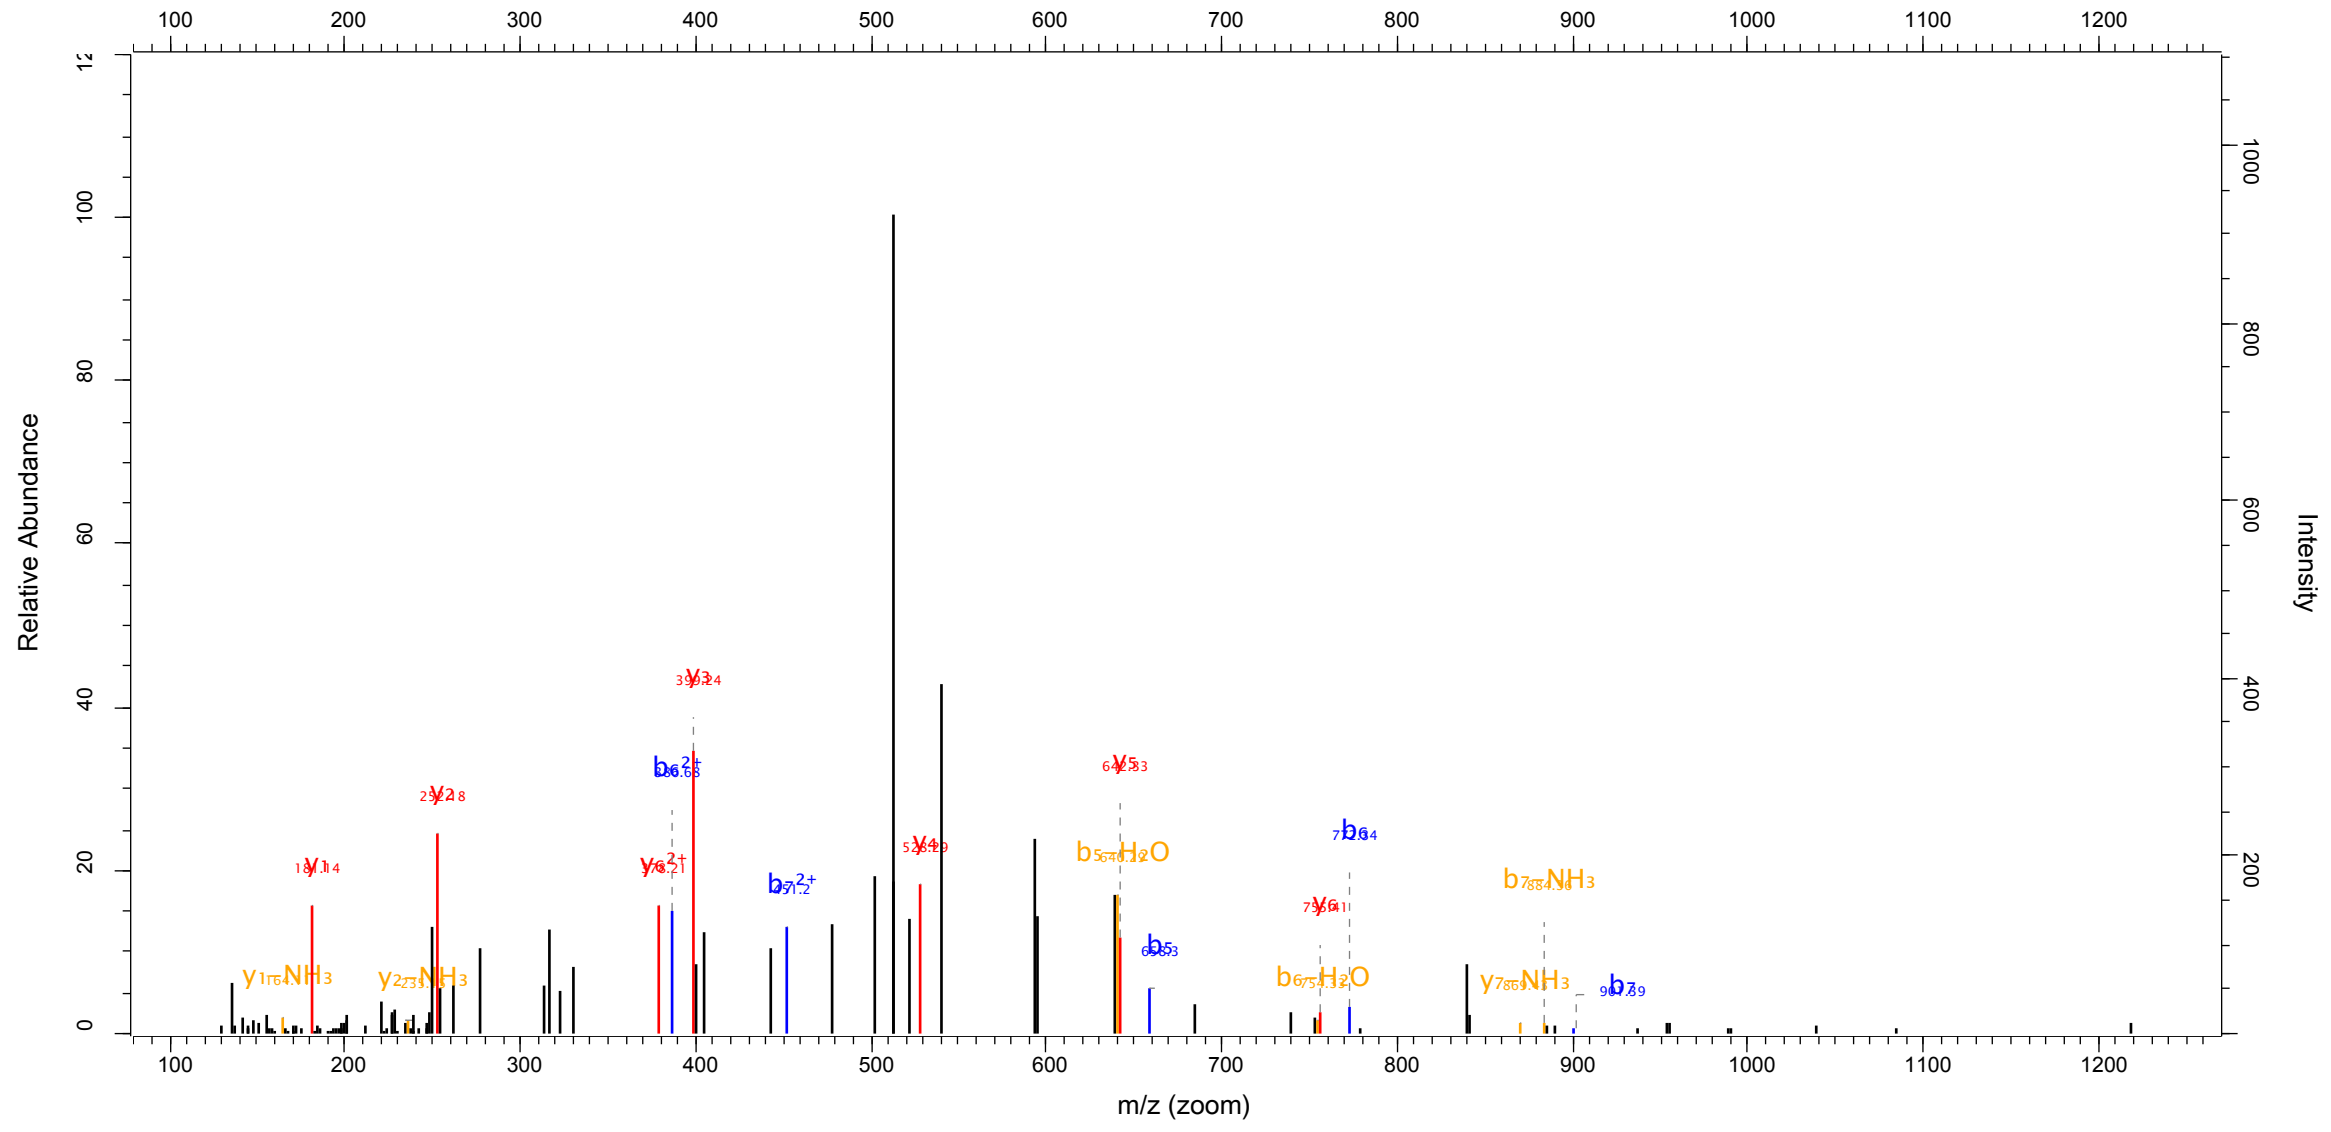

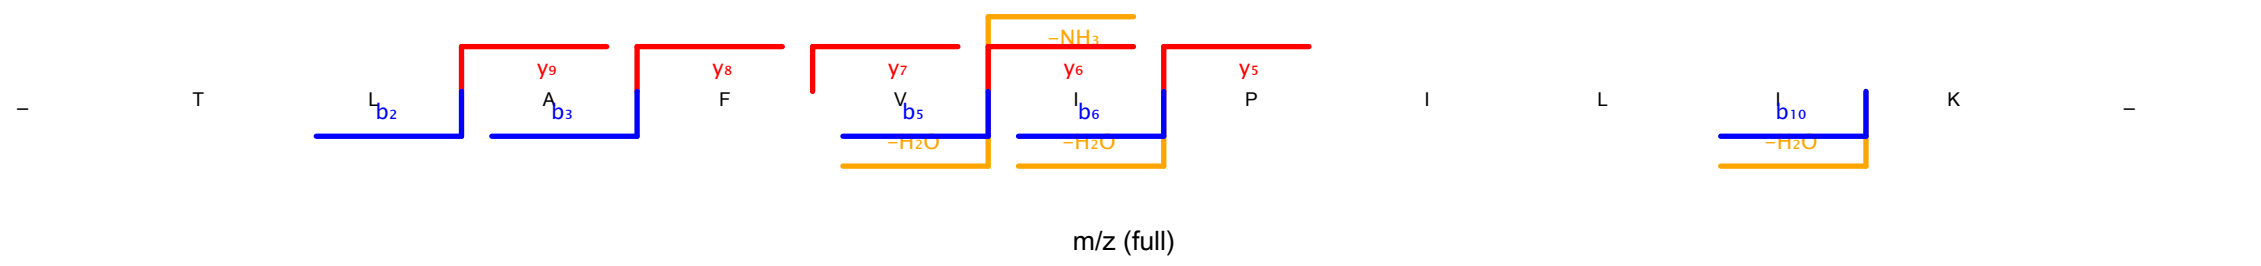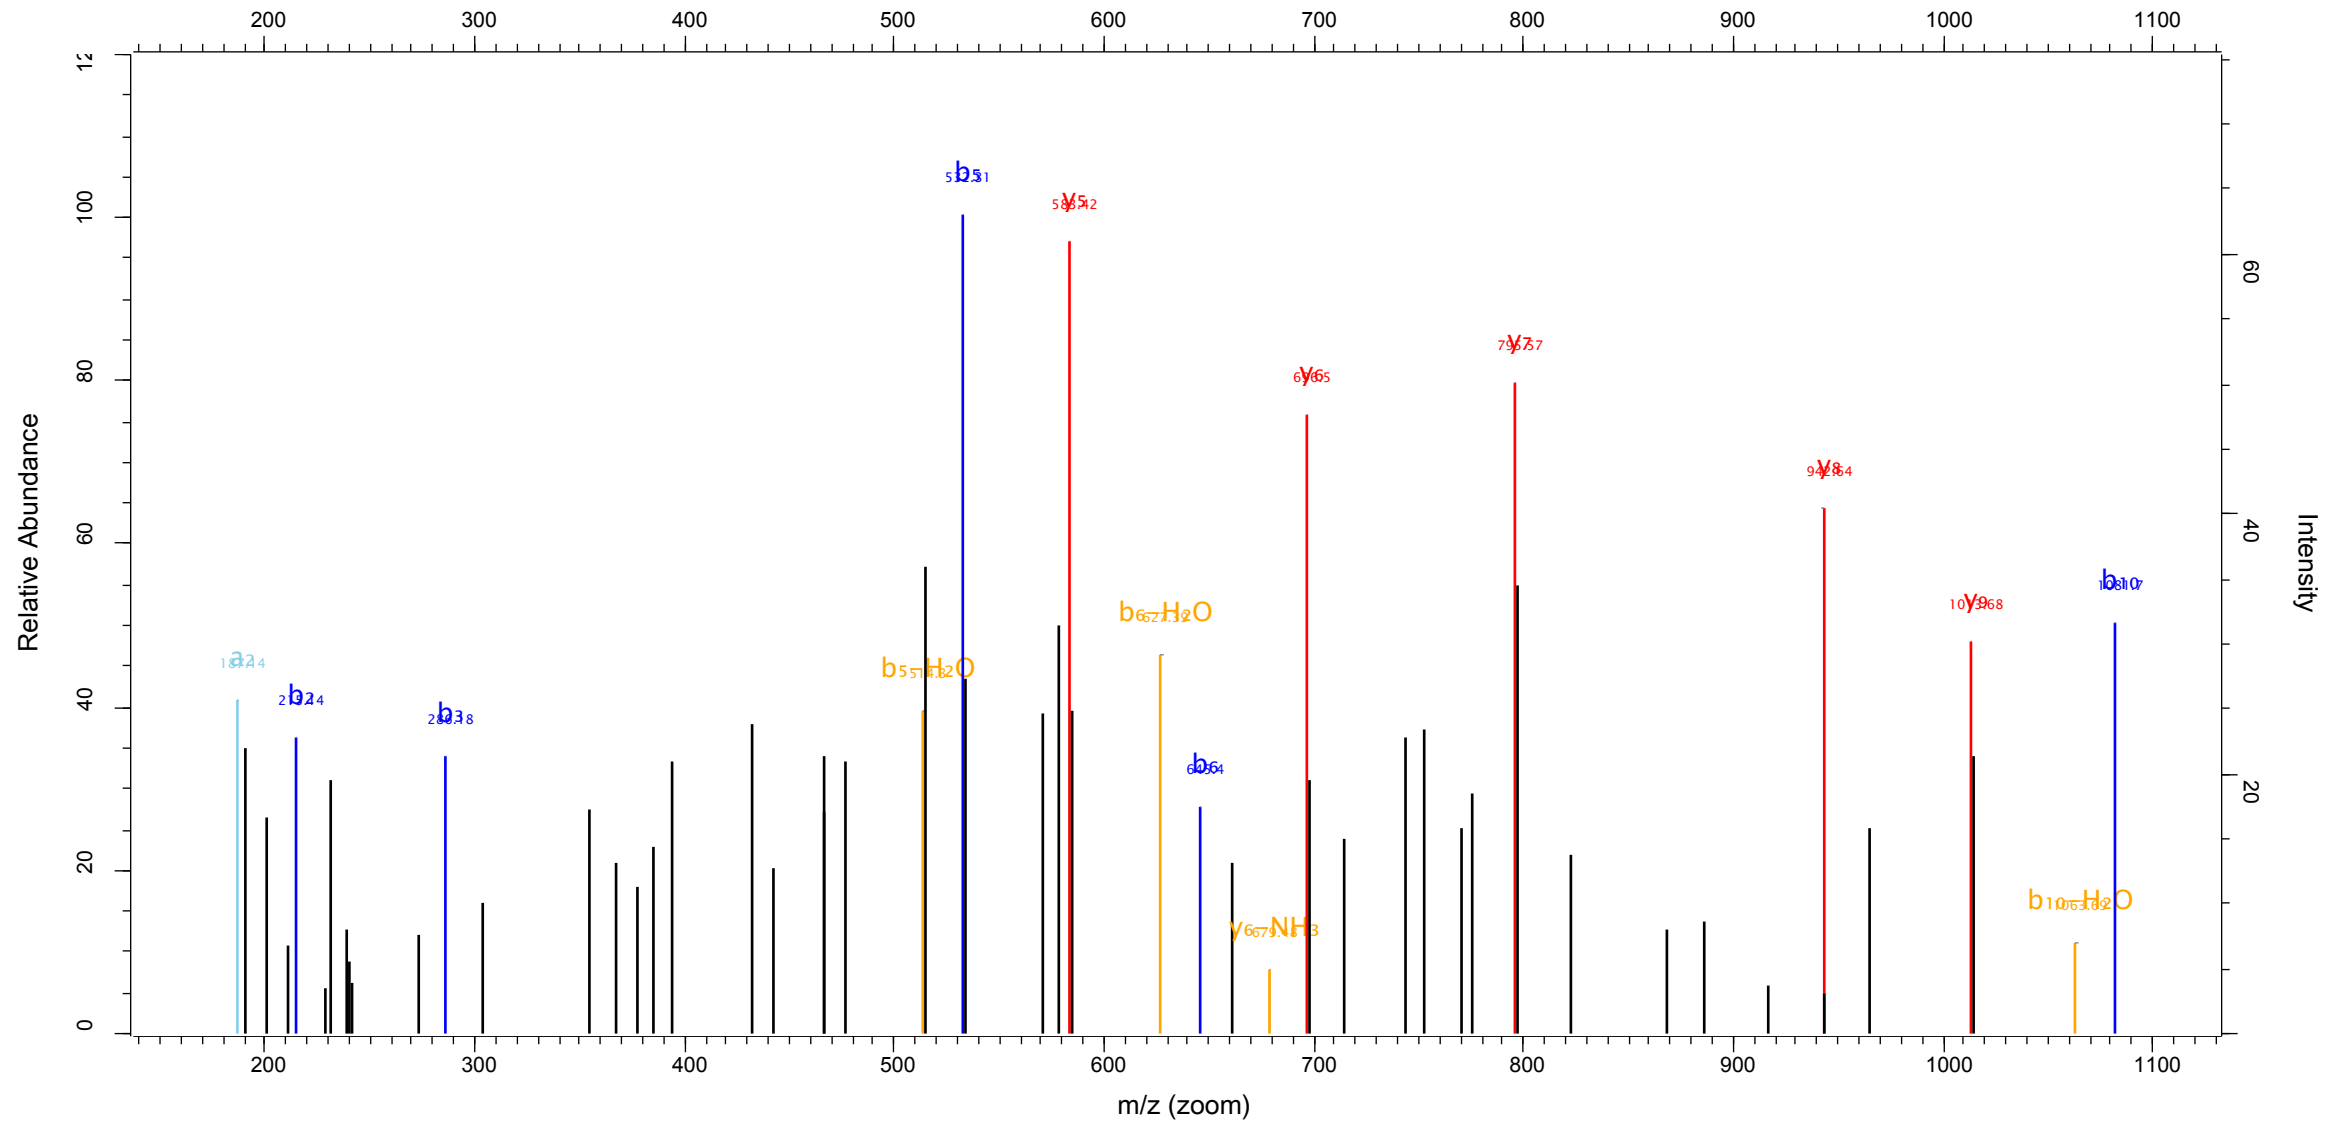

Scan number 14799 Raw file nak\_cdc48UbconjugatesSAX5\_22may10\_6  
 Method ITMS; CID Pepti... 105.03

Protein Group 728

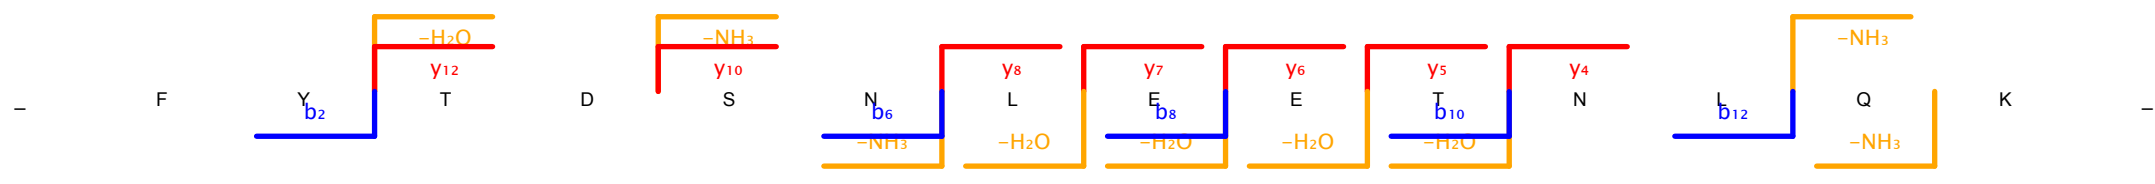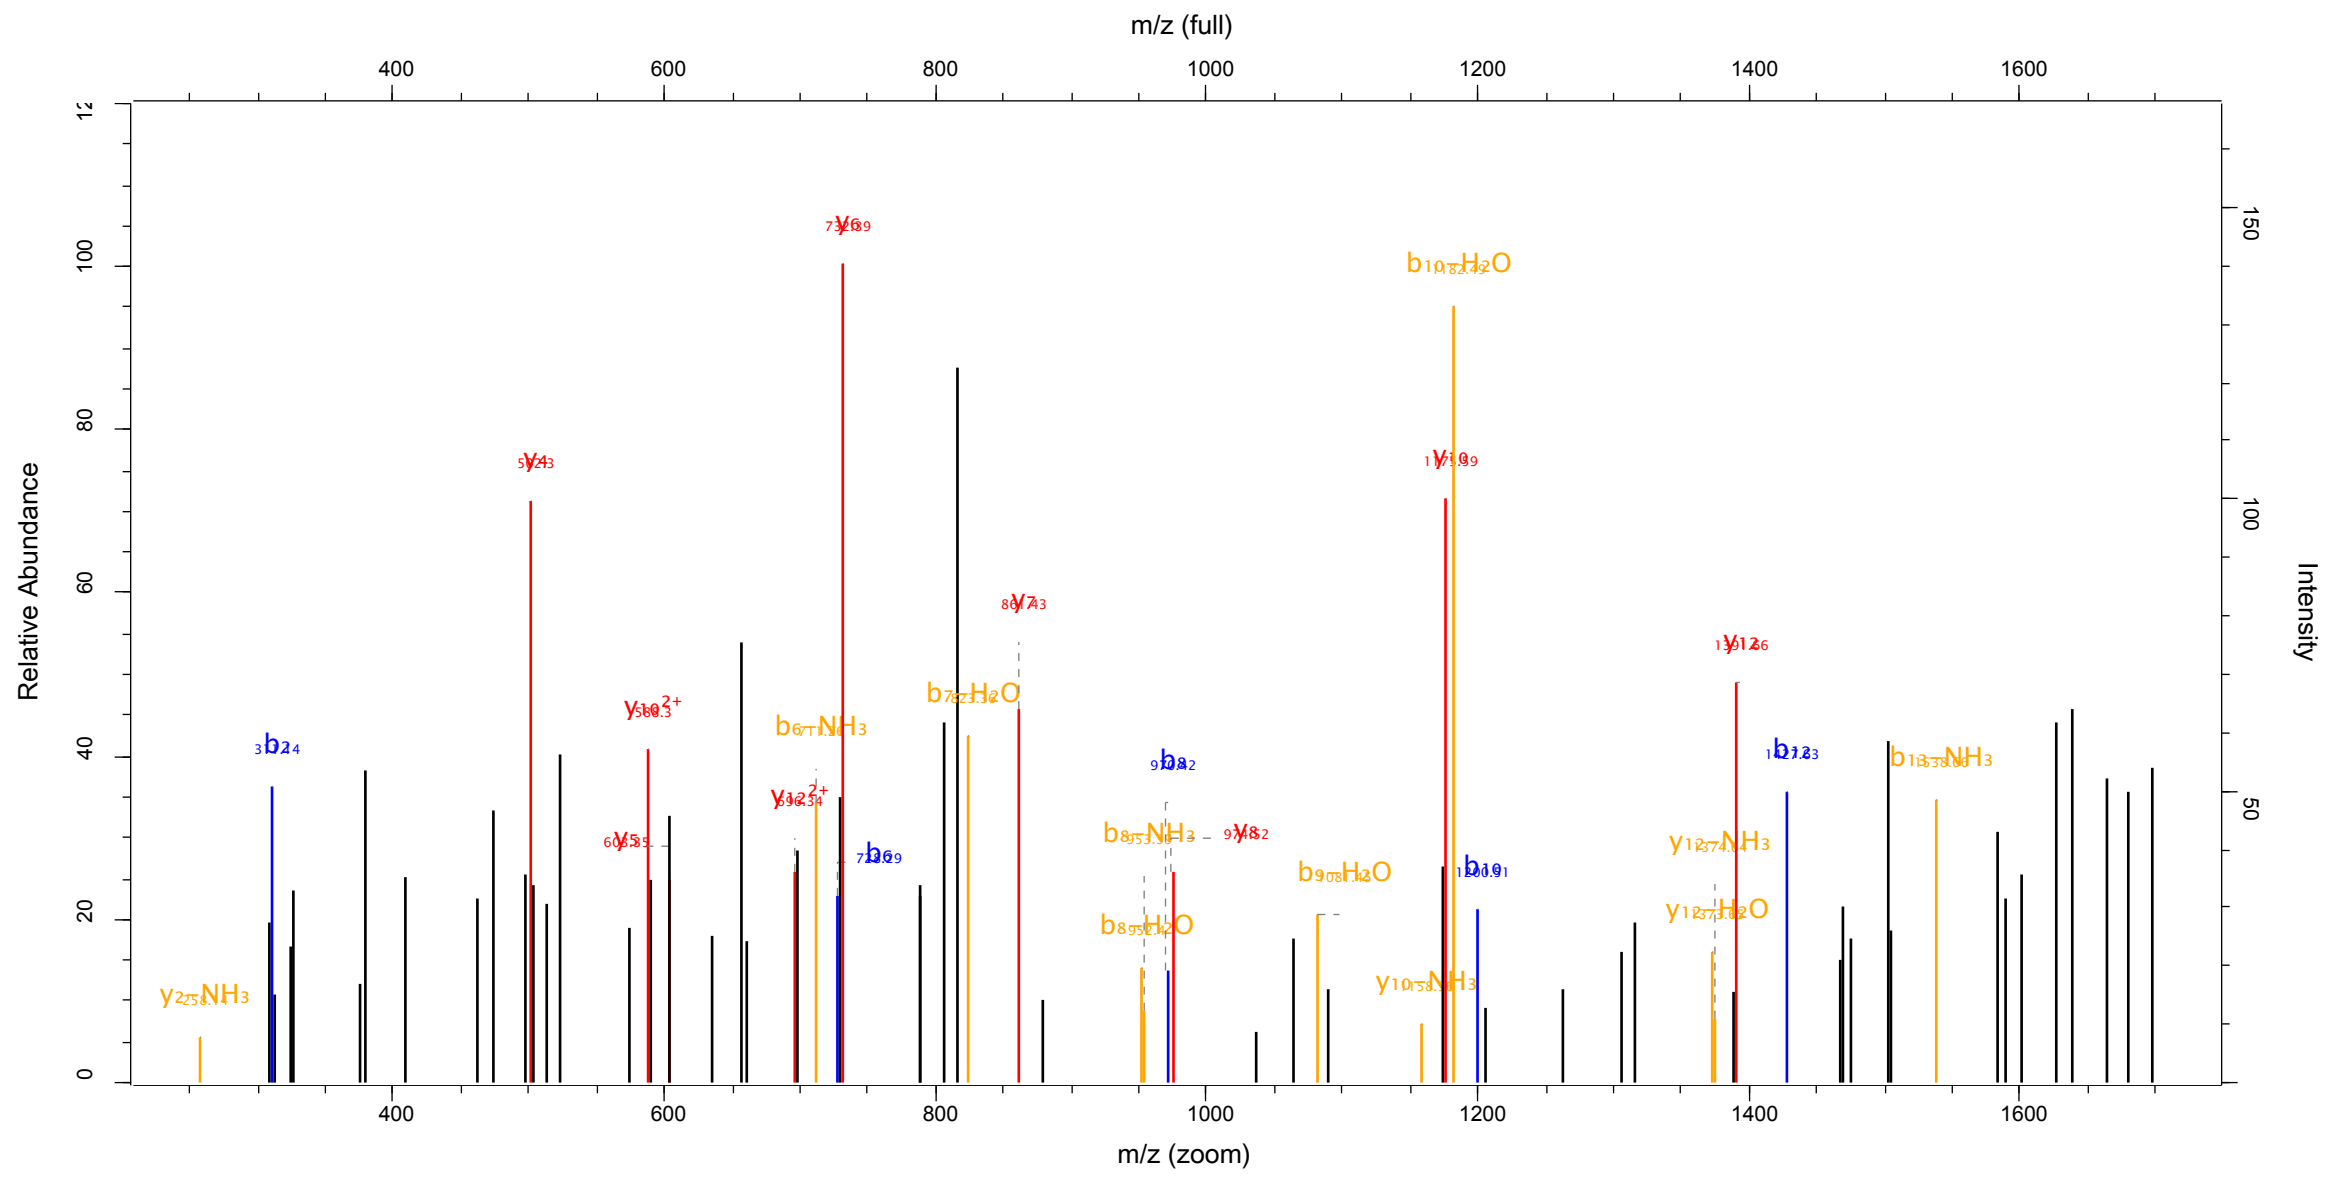

Scan number 25164 Raw file nak\_WTonetooneSAX6\_4feb11\_06  
 Method ITMS; CID Pepti... 95.43

Protein Group 794

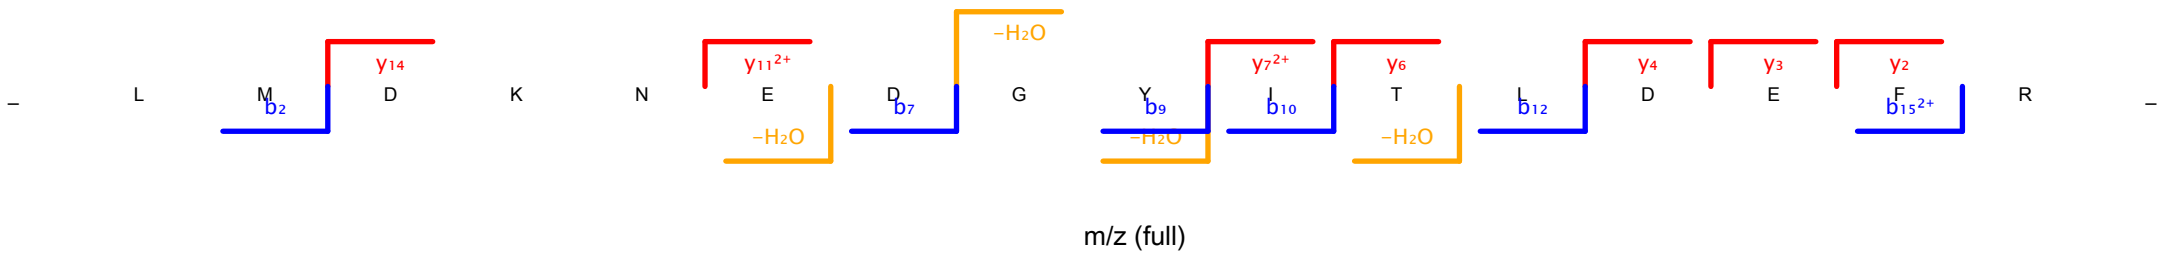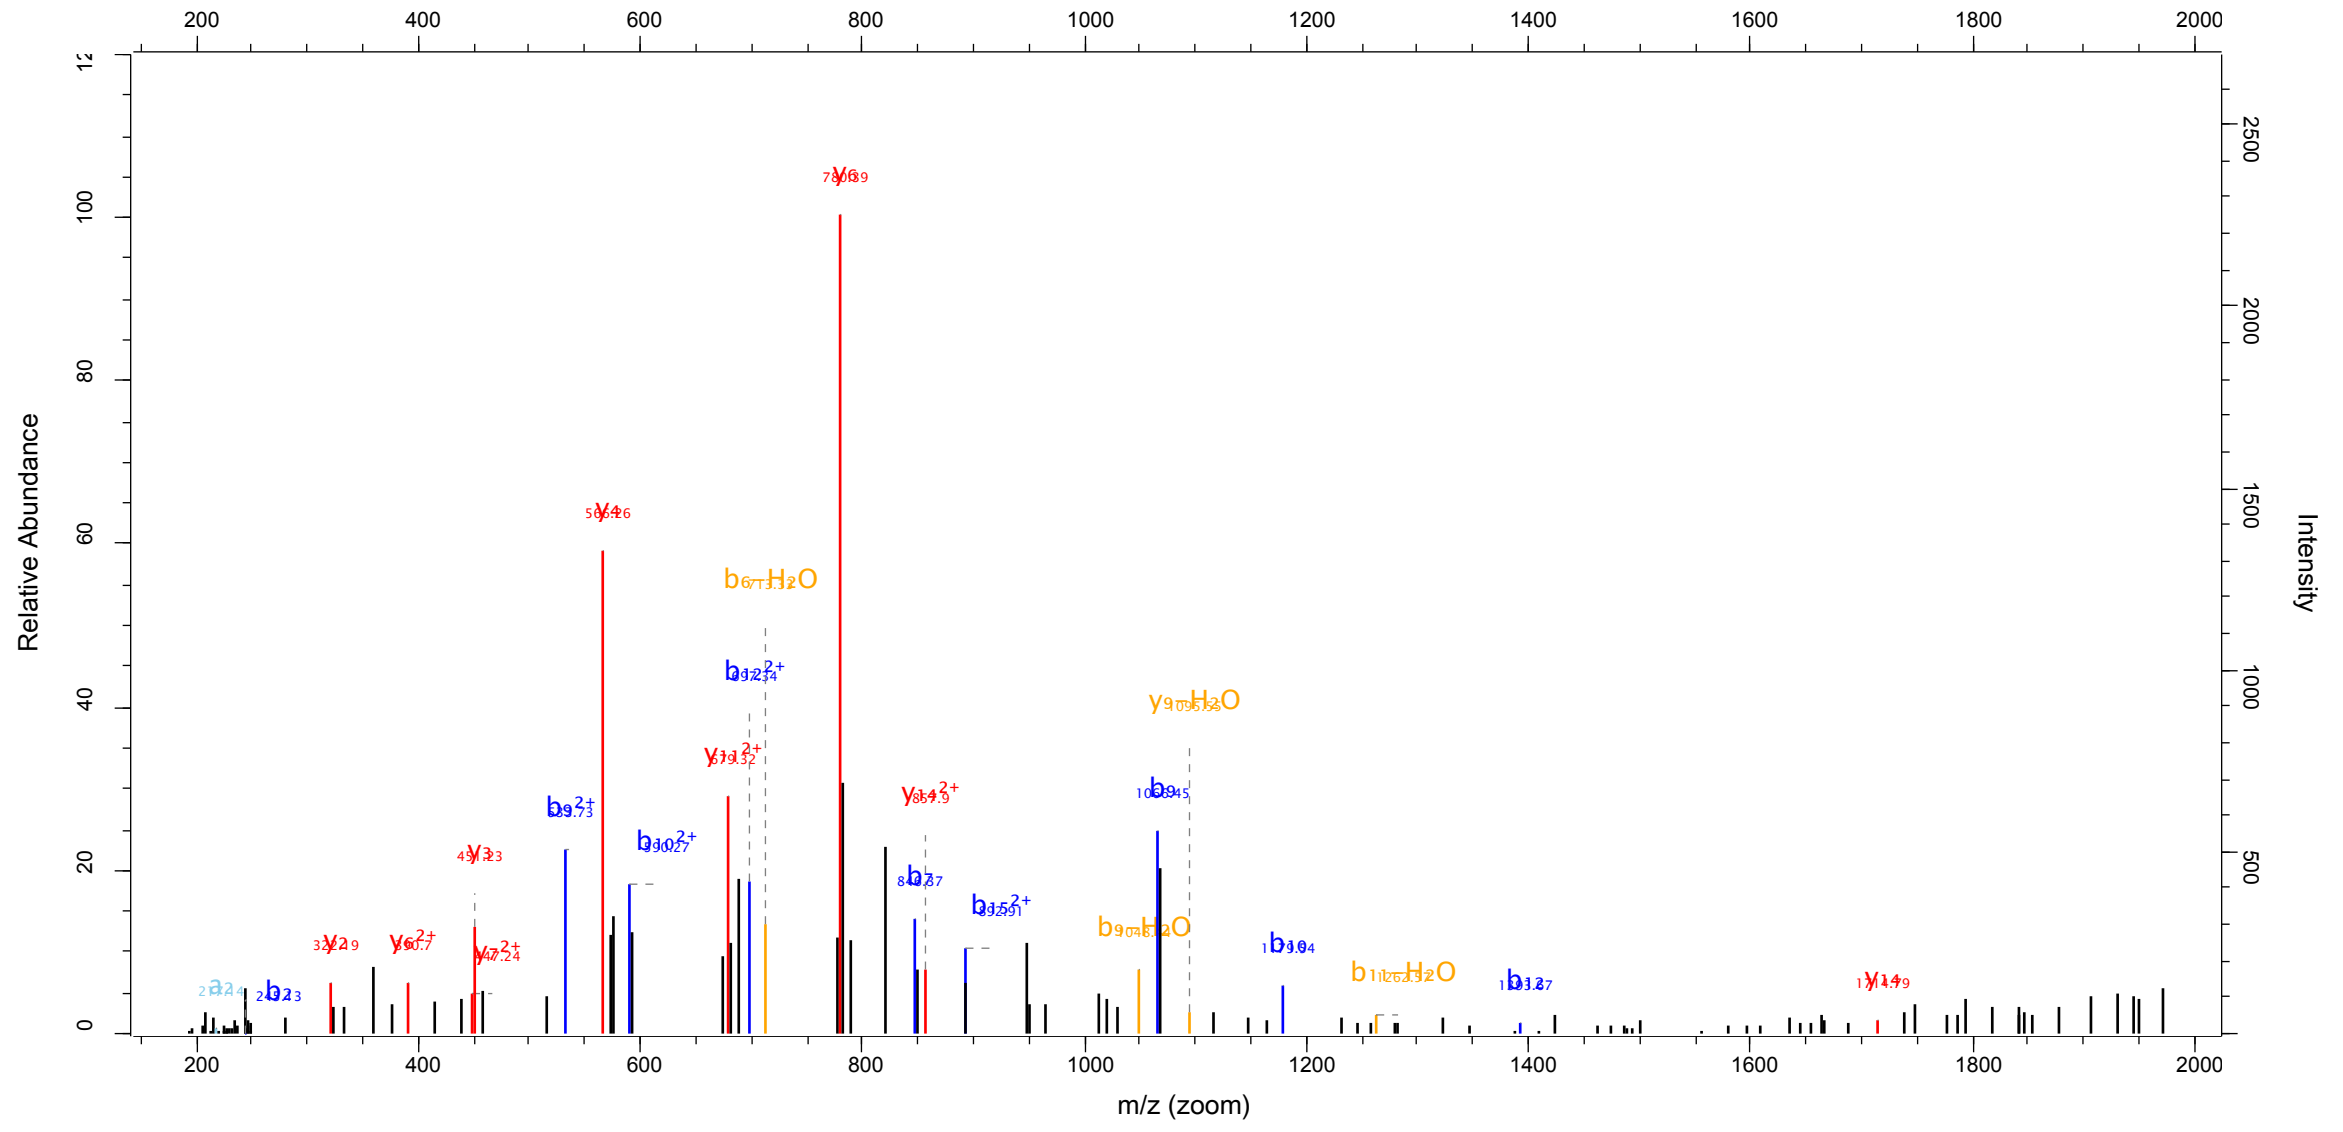



Scan number  
Method

33948  
ITMS; CID

Raw file  
Pepti...

nak\_cdc48UbconjugatesSAX6\_21may17  
69.19

Protein Group 796

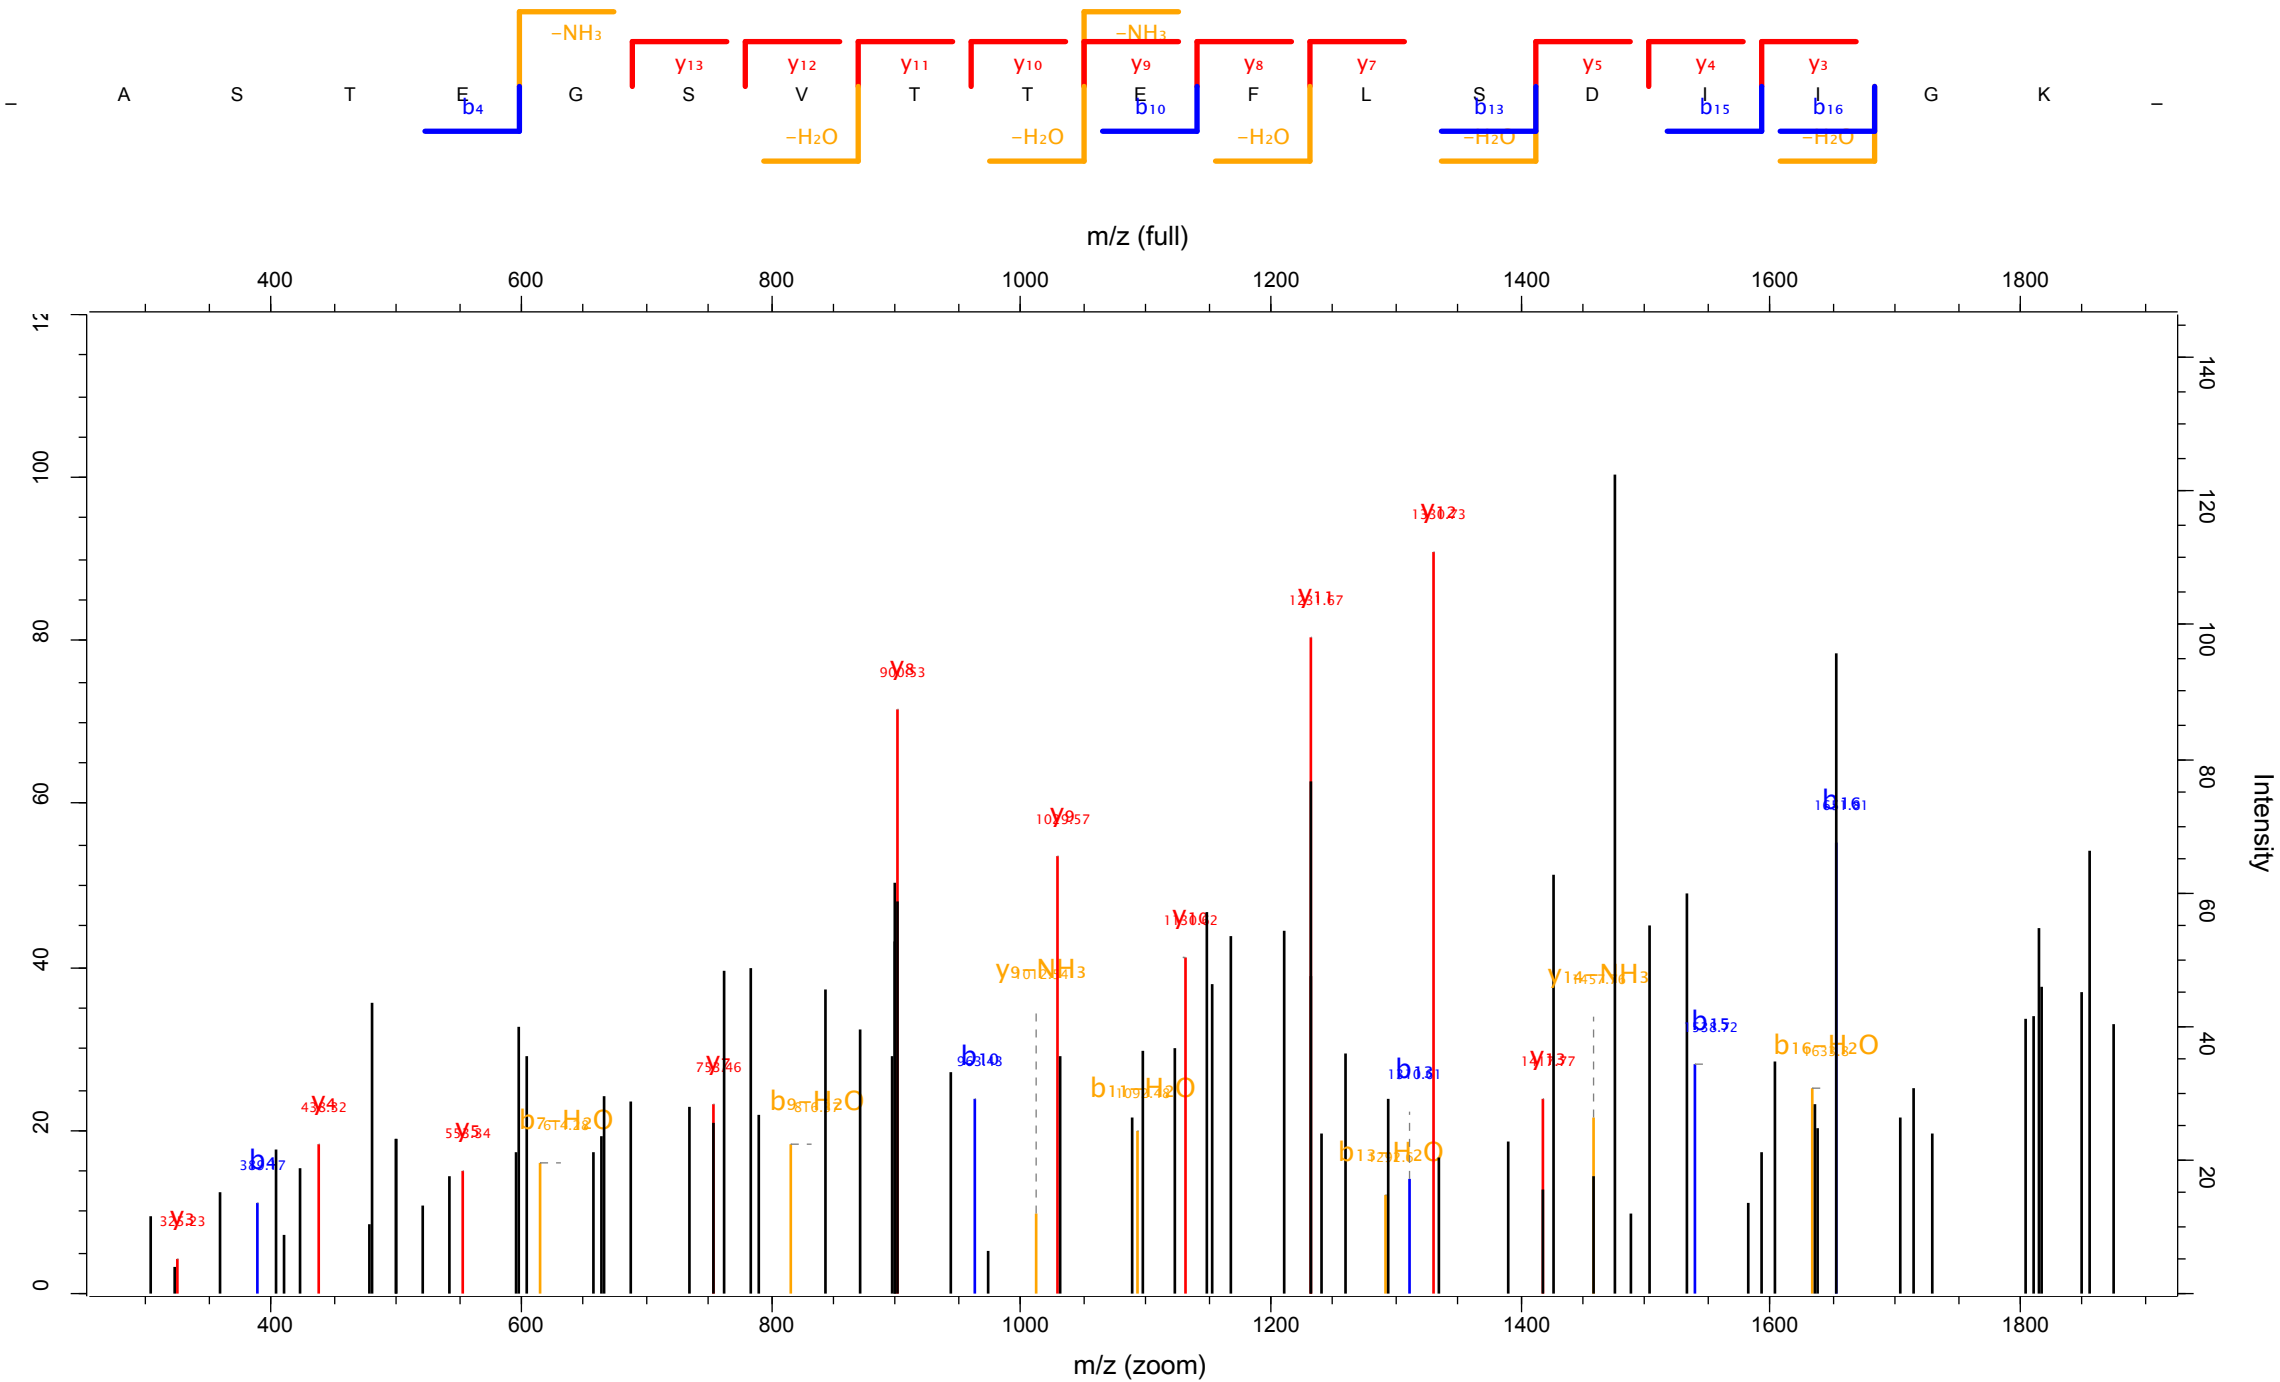

Scan number 14421 Raw file nak\_ubx4LightSAX5\_11 nov05  
 Method ITMS; CID Pepti... 91.47

Protein Group 806

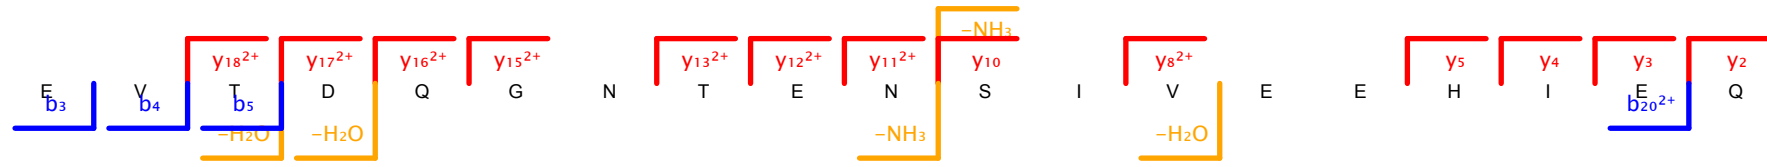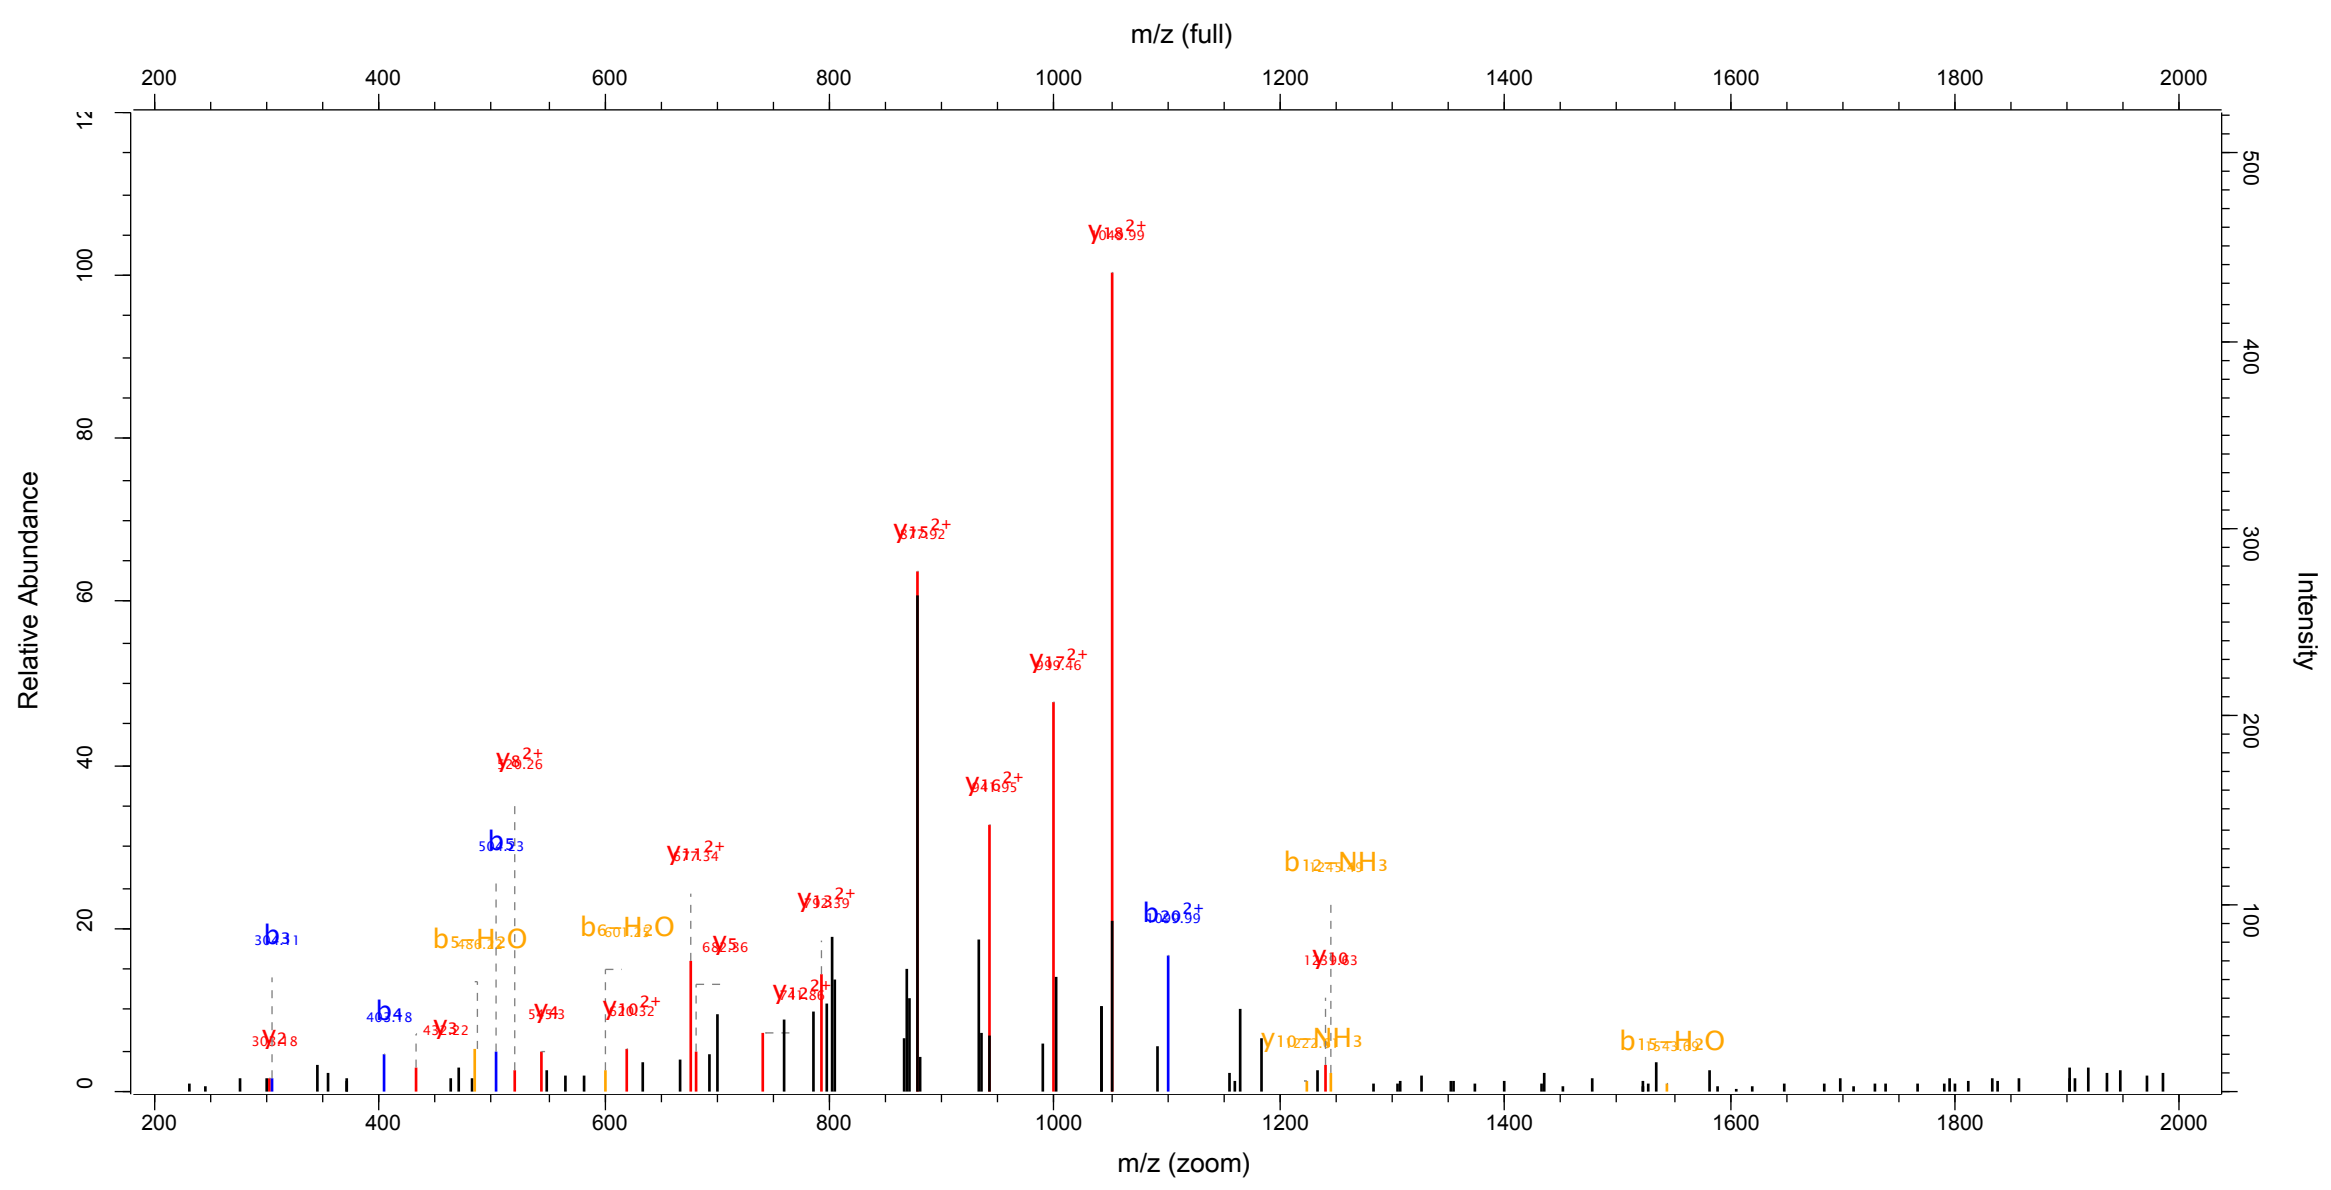

Scan number  
Method

35722  
ITMS; CID

Raw file  
Pepti...

nak\_cdc48UbconjugatesSAX2\_21may13  
75.48

Protein Group 849

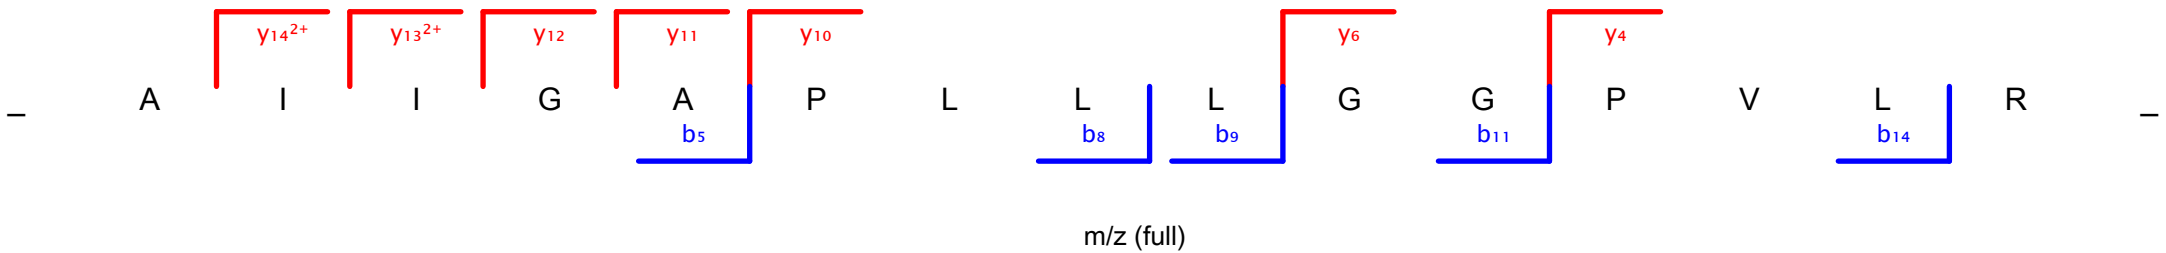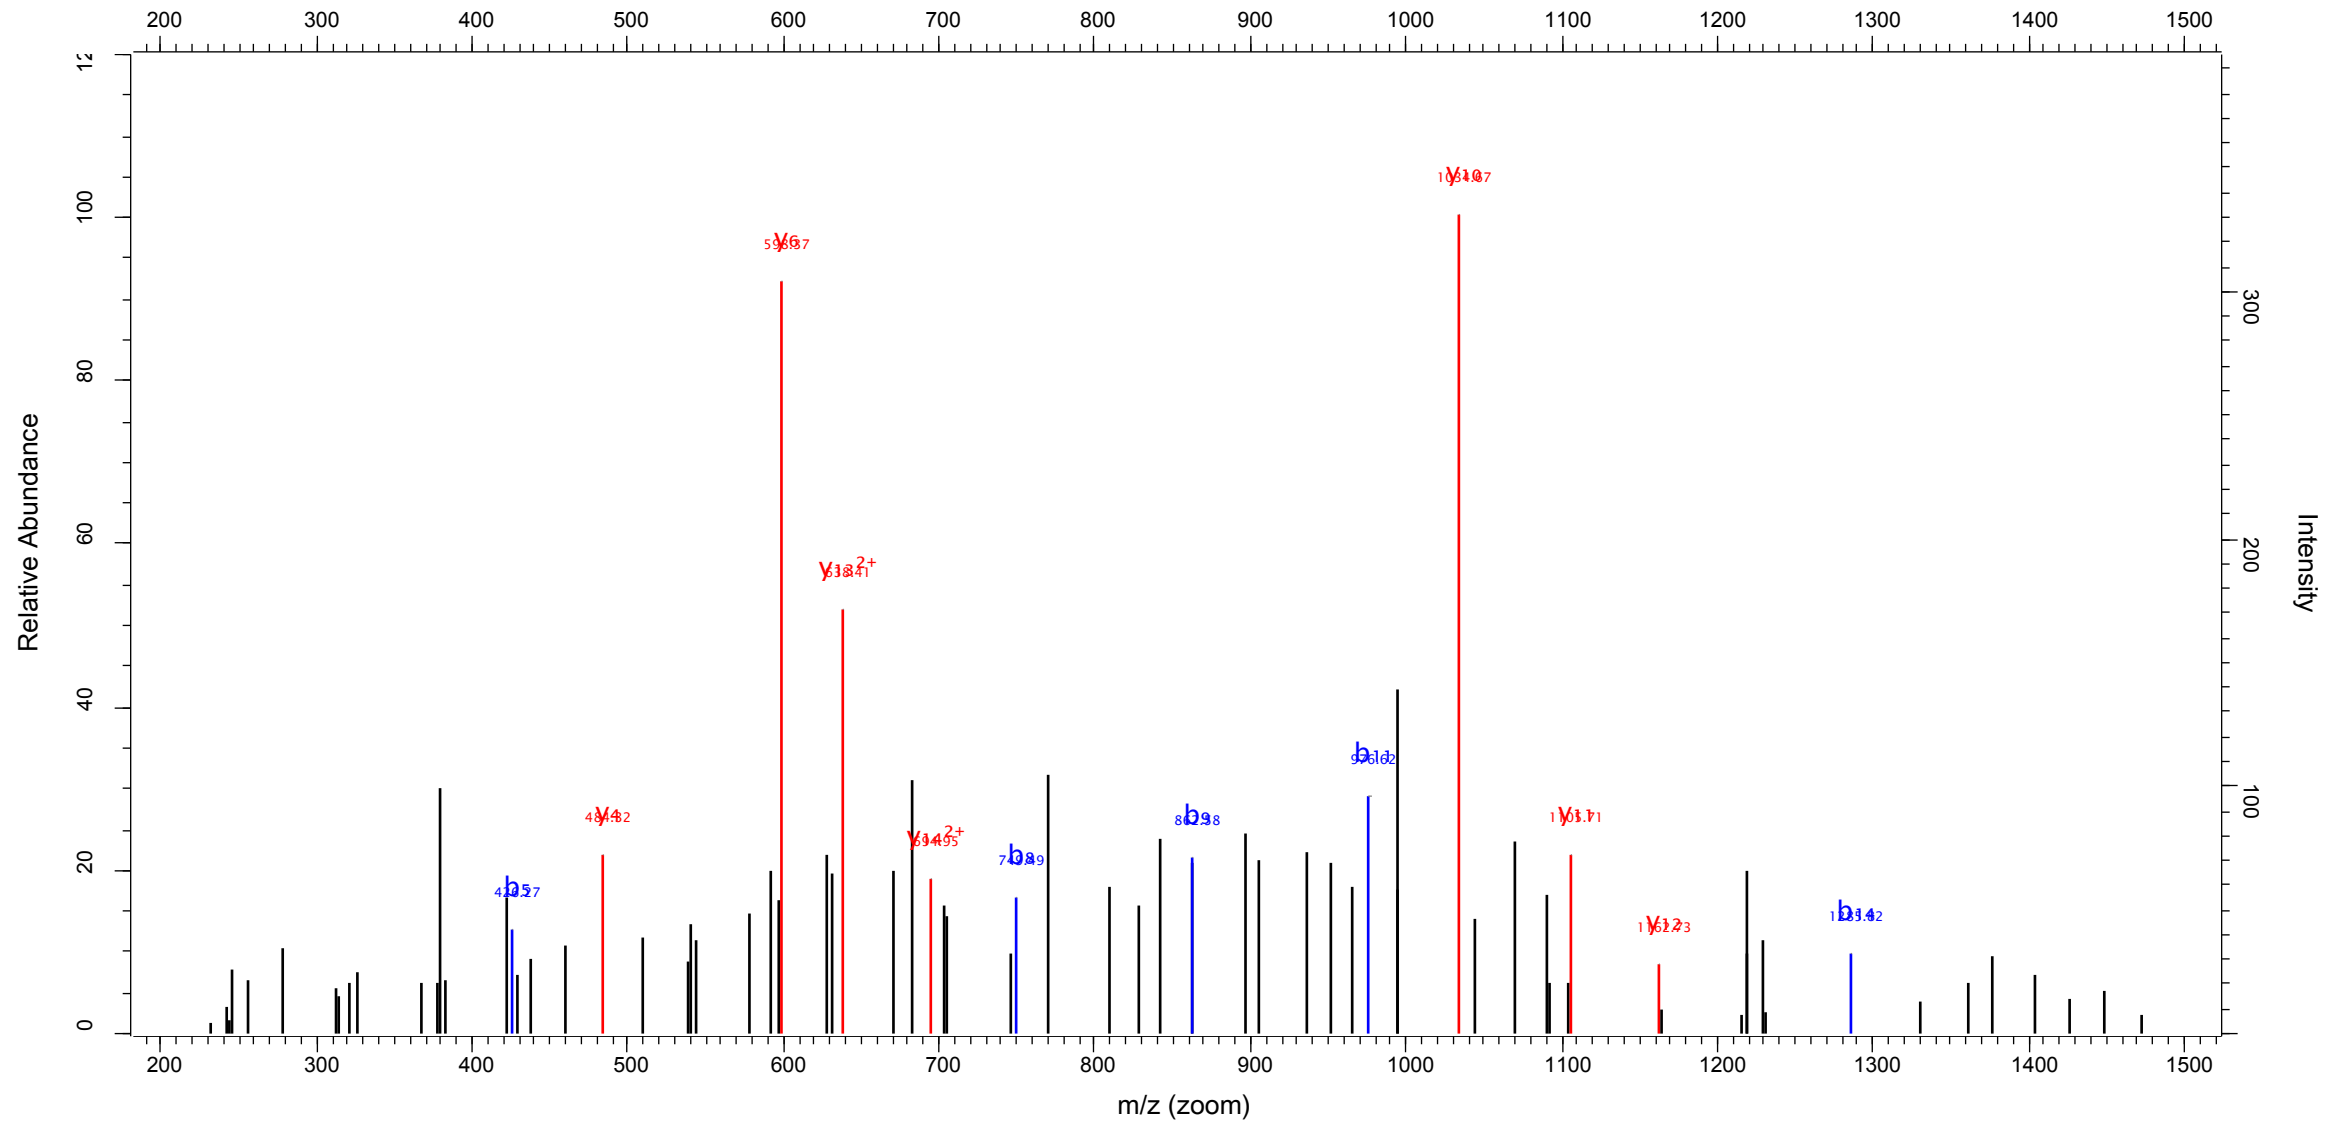

Scan number  
Method

15021  
ITMS; CID

Raw file  
Pepti...

nak\_UBX2HSAX6\_8feb11\_10  
194.48

Protein Group 868

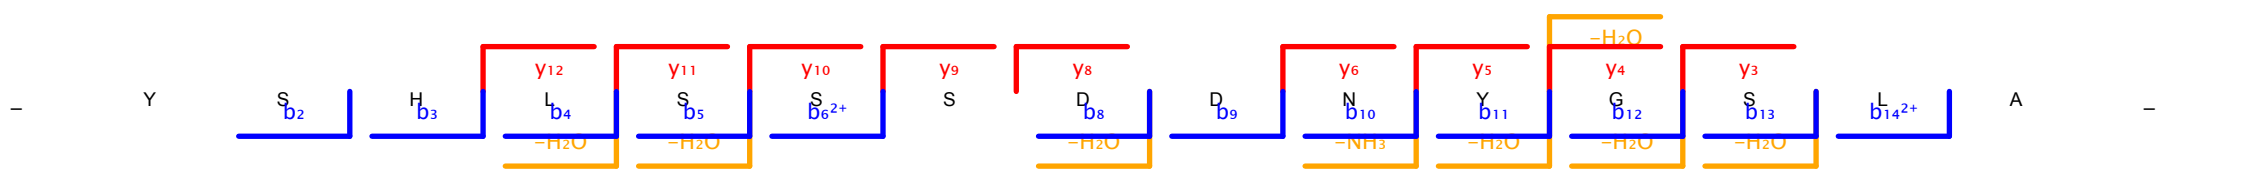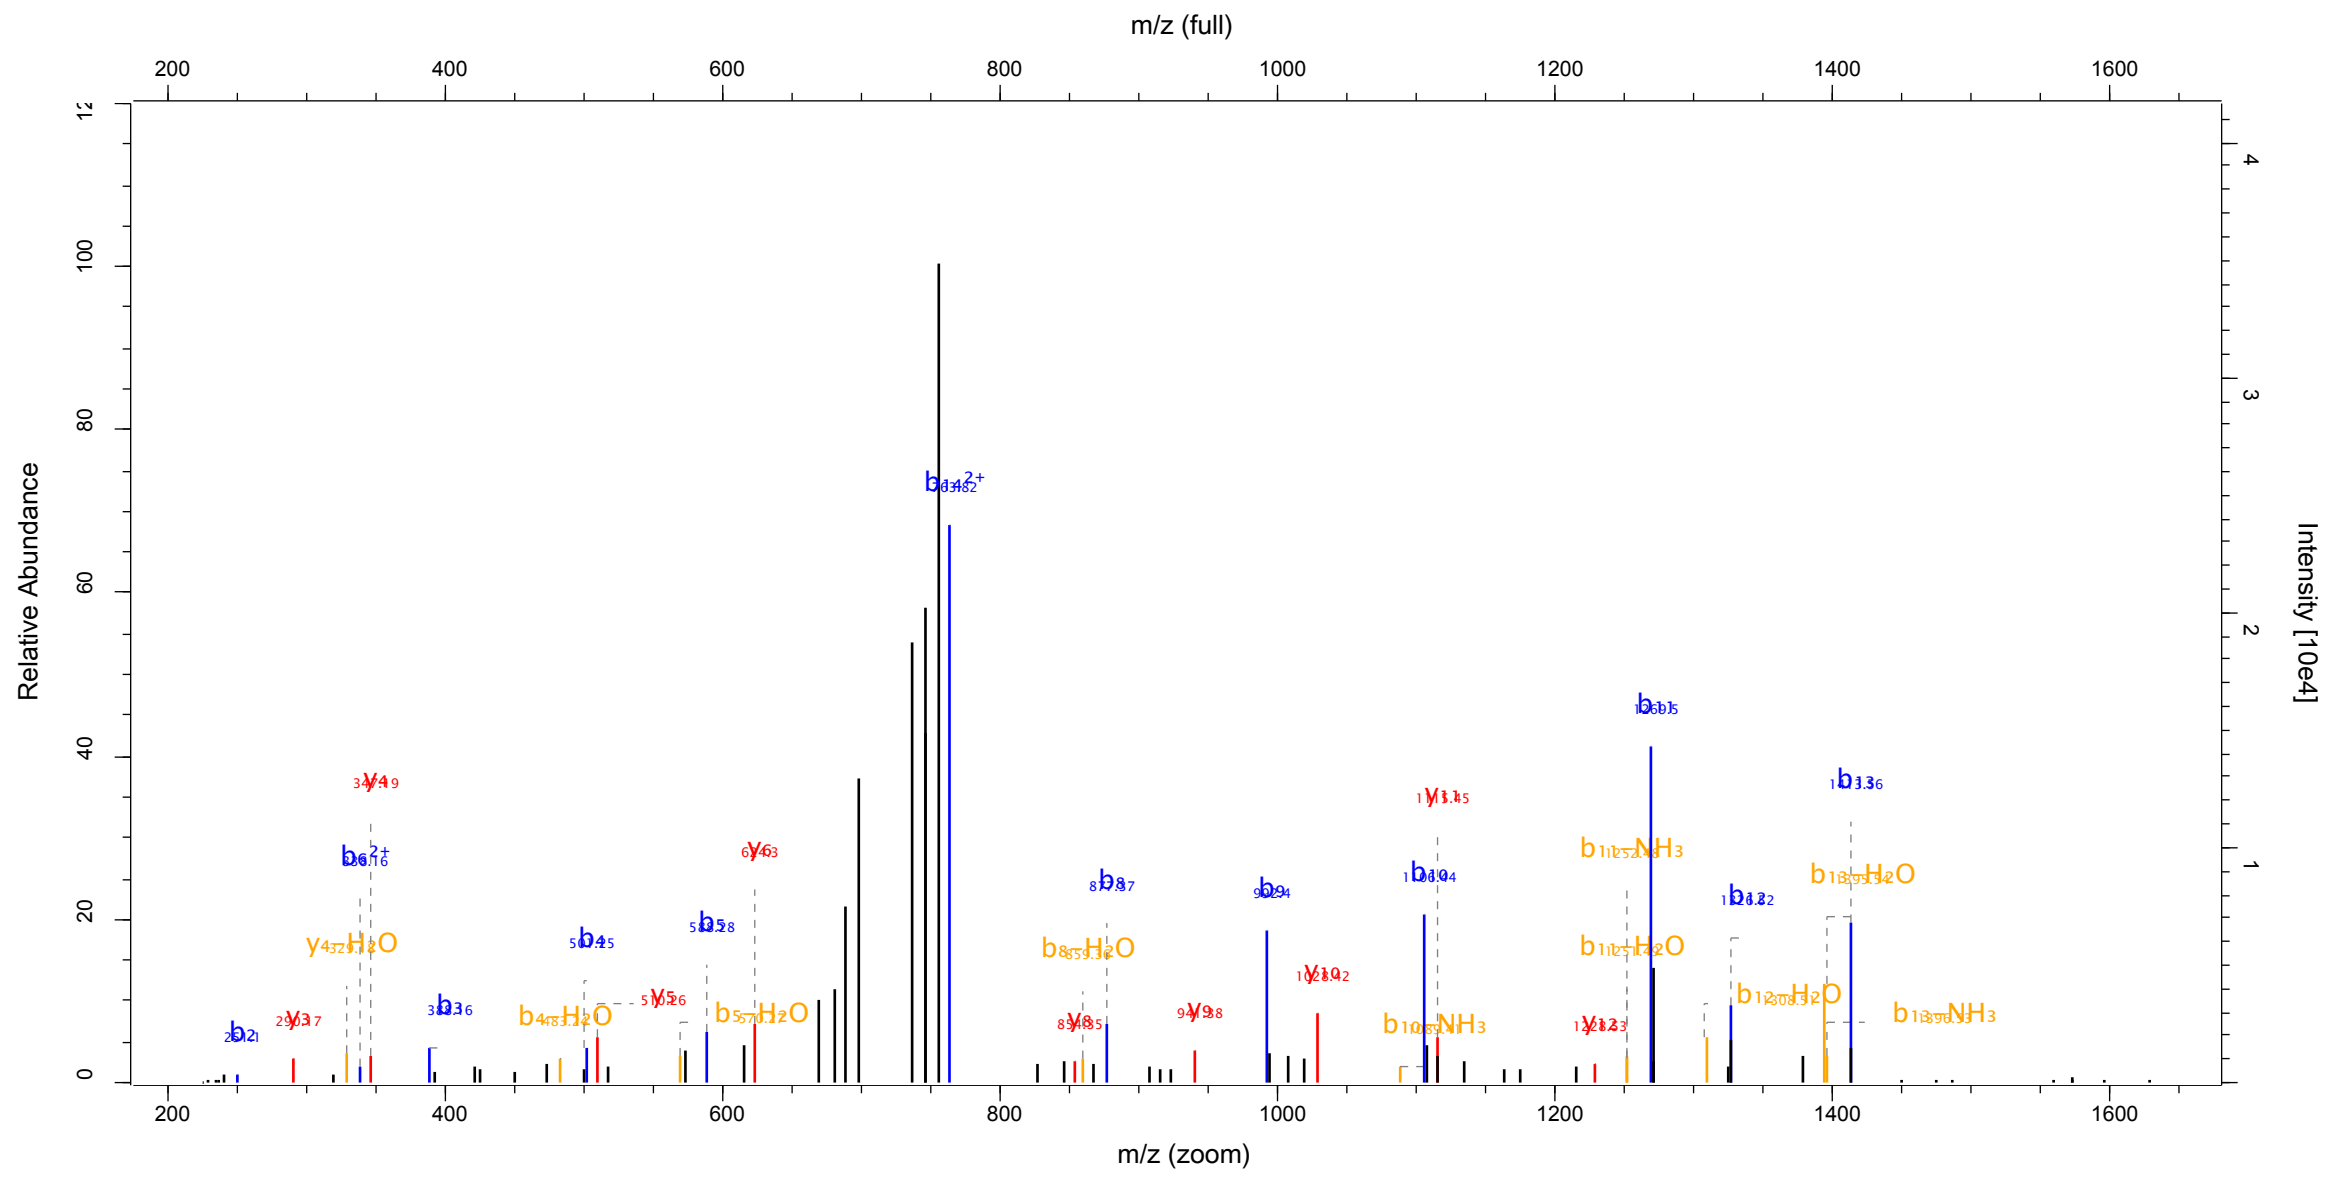

Scan number  
Method

13027  
ITMS; CID

Raw file  
Pepti...

nak\_cdc48UbconjugatecontrolSAX3\_21 may22  
112.75

Protein Group 874

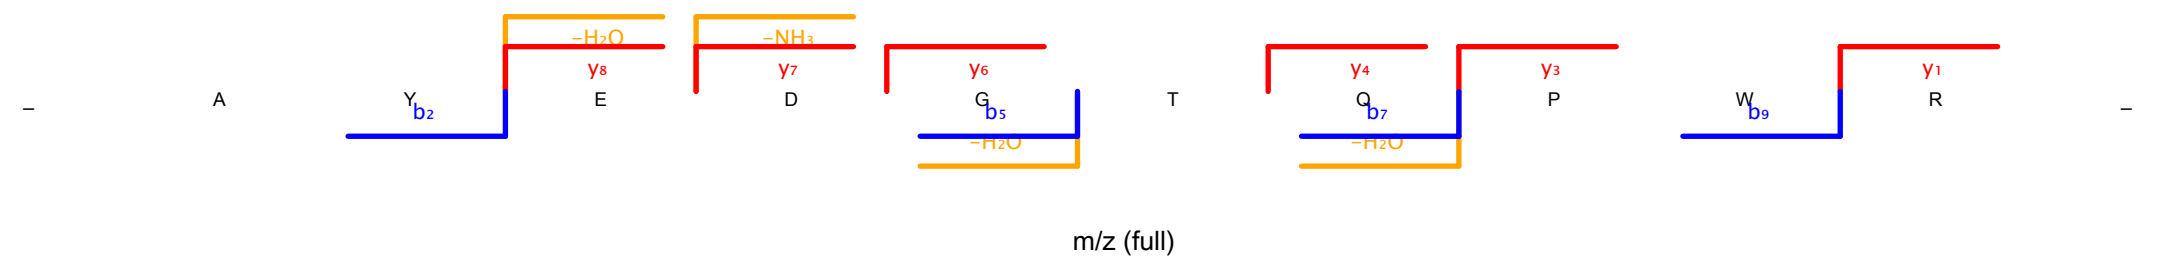

Relative Abundance

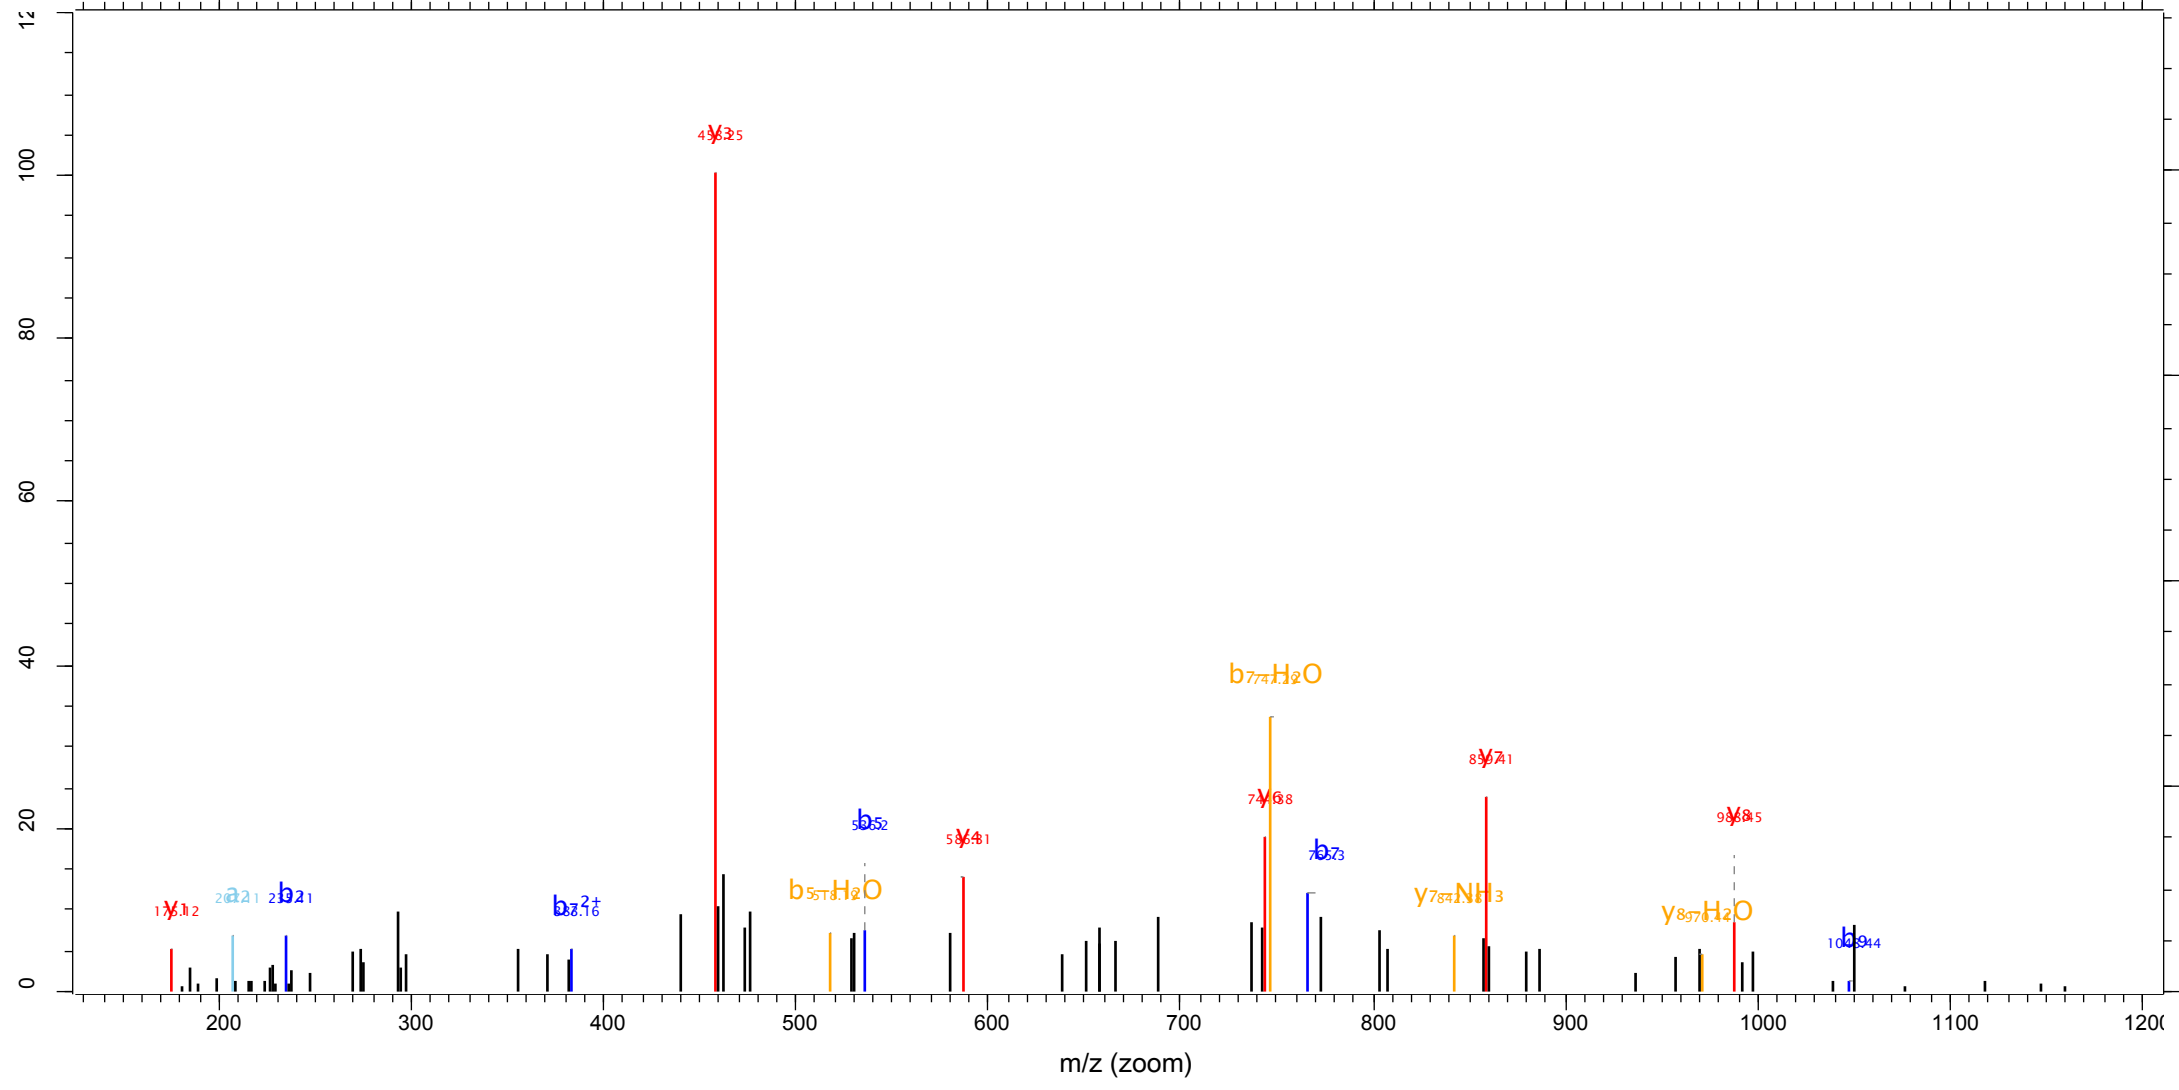

Intensity

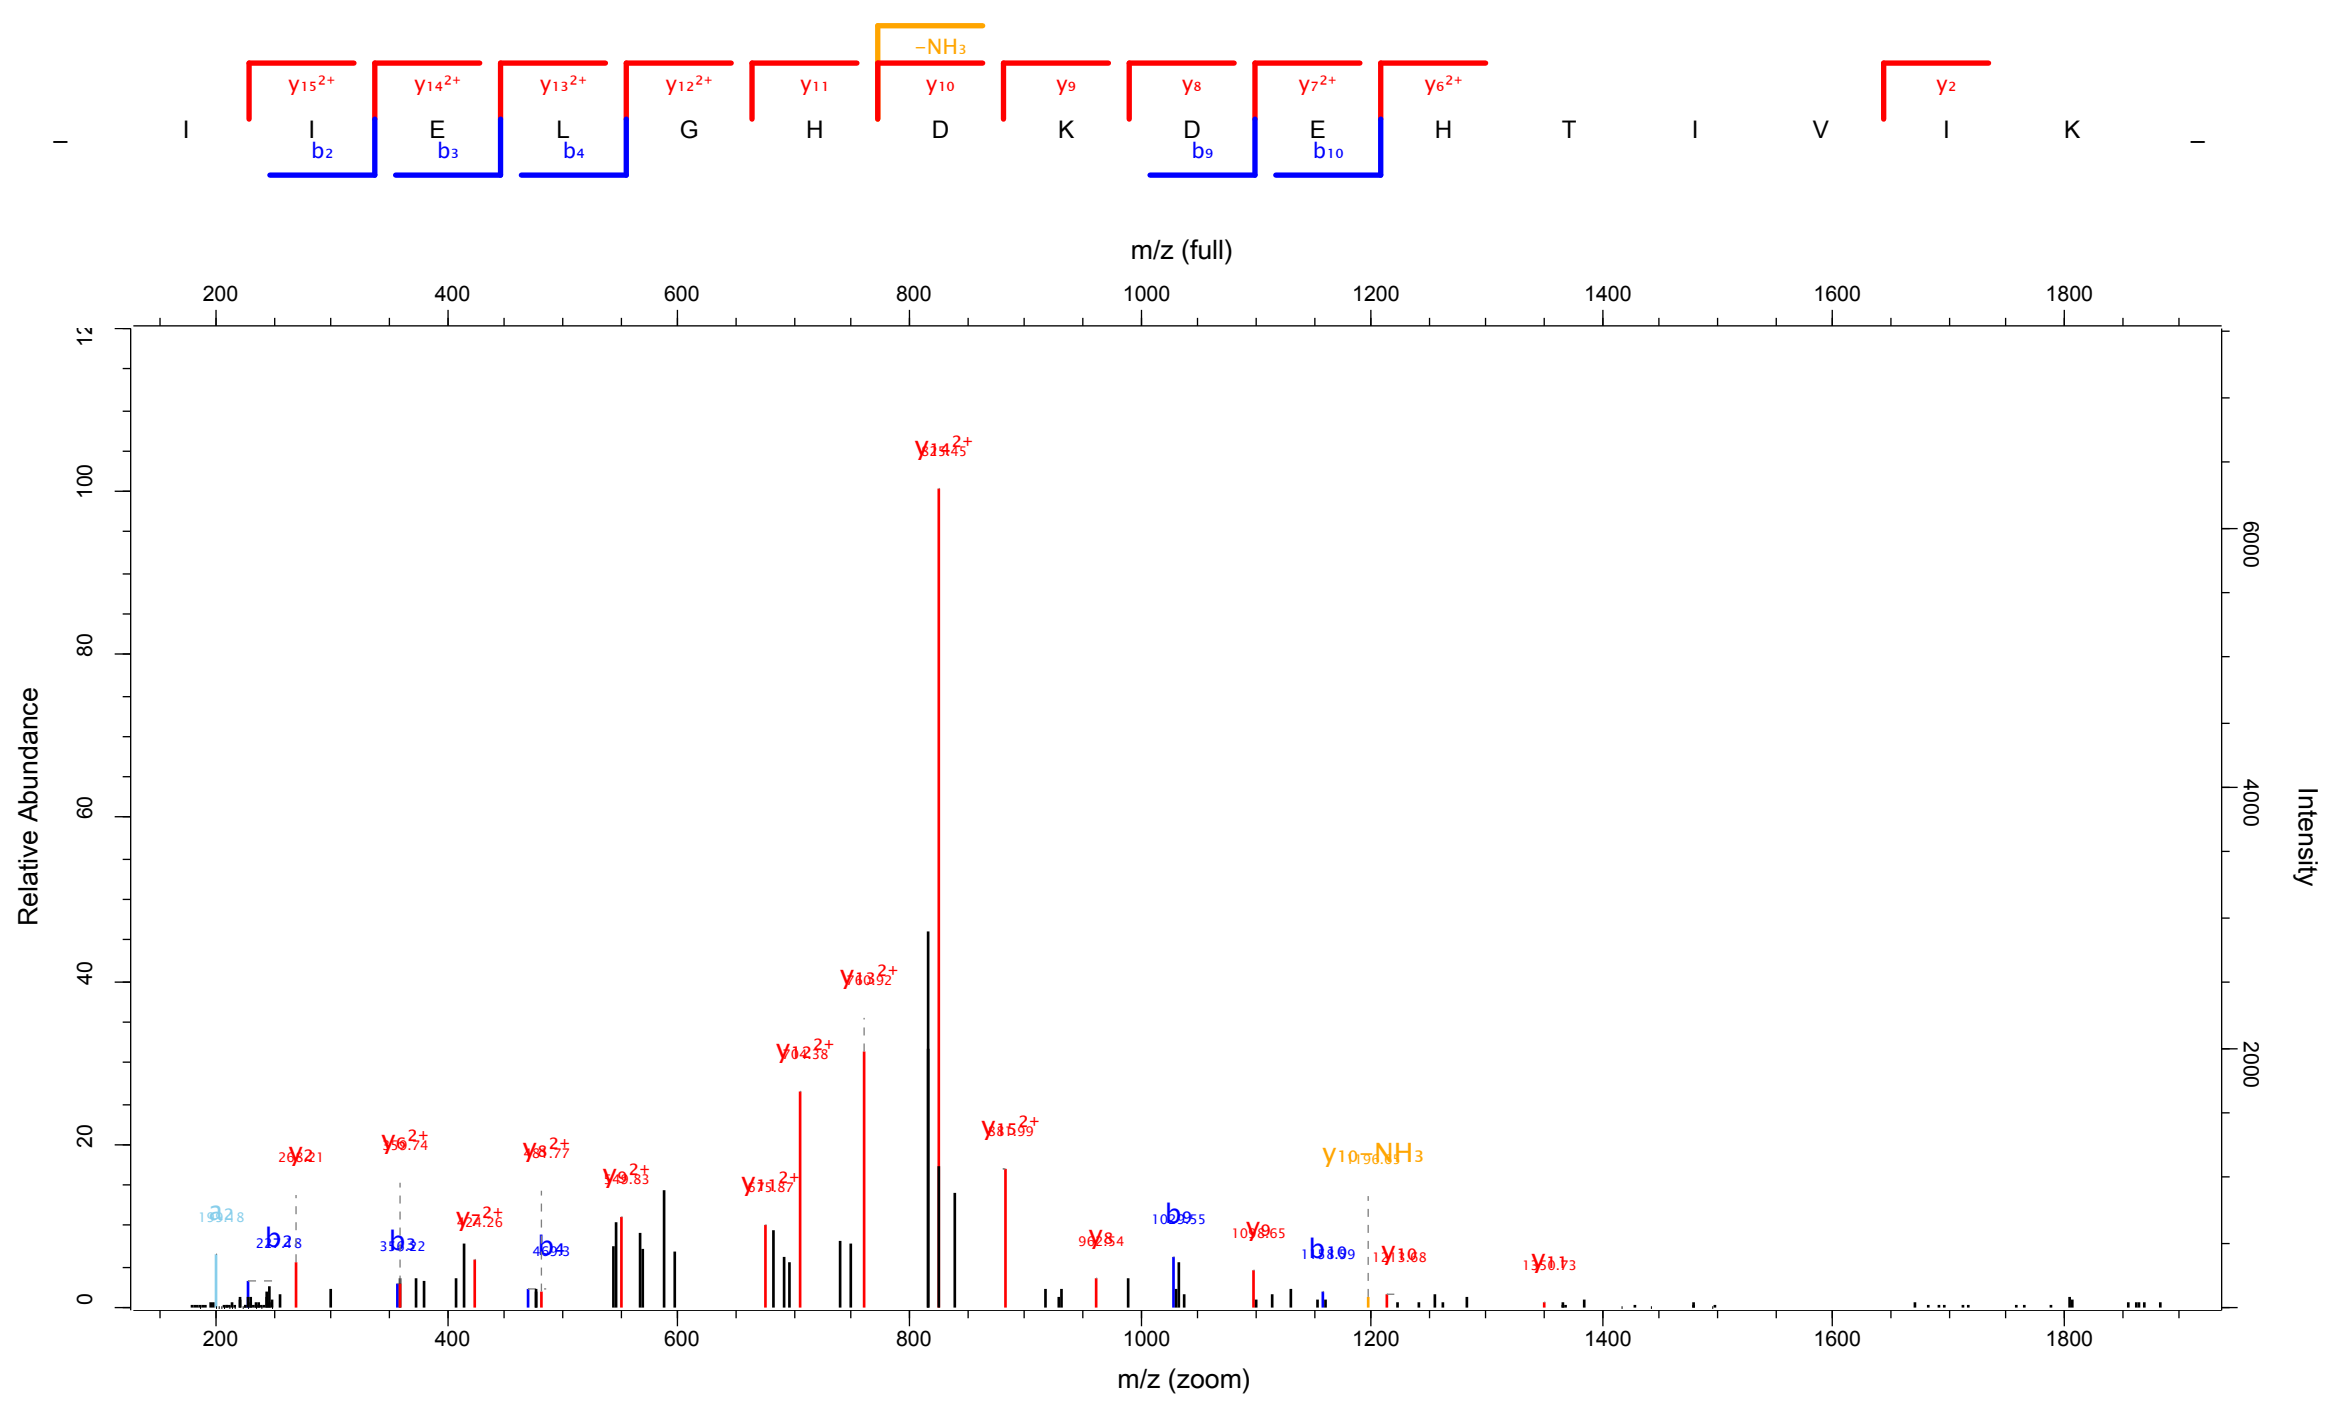

Scan number  
Method

25643  
ITMS; CID

Raw file  
Pepti...

nak\_UBX6SAX2L\_14jan11\_12  
158.04

Protein Group 879

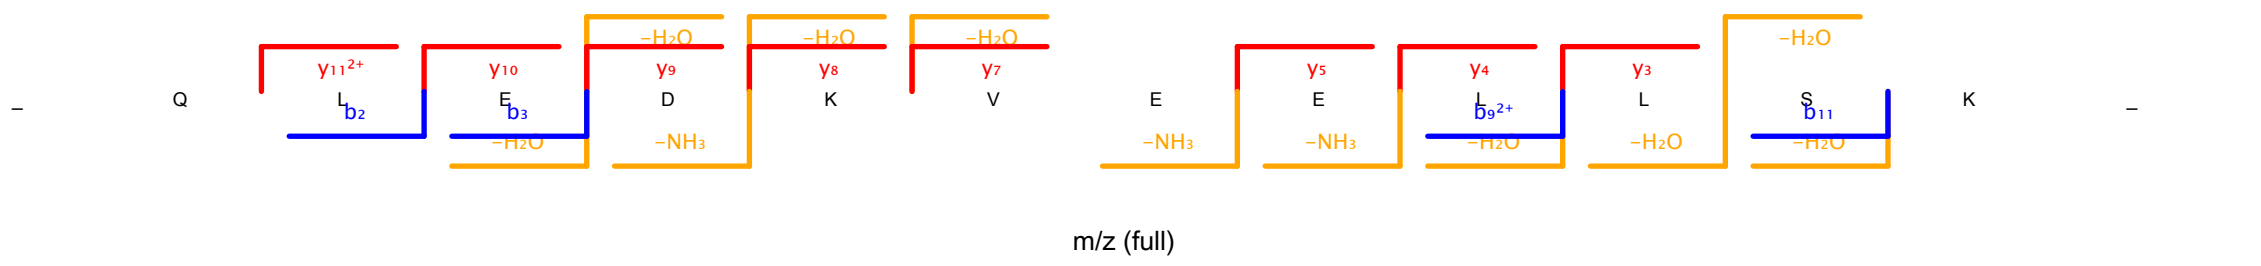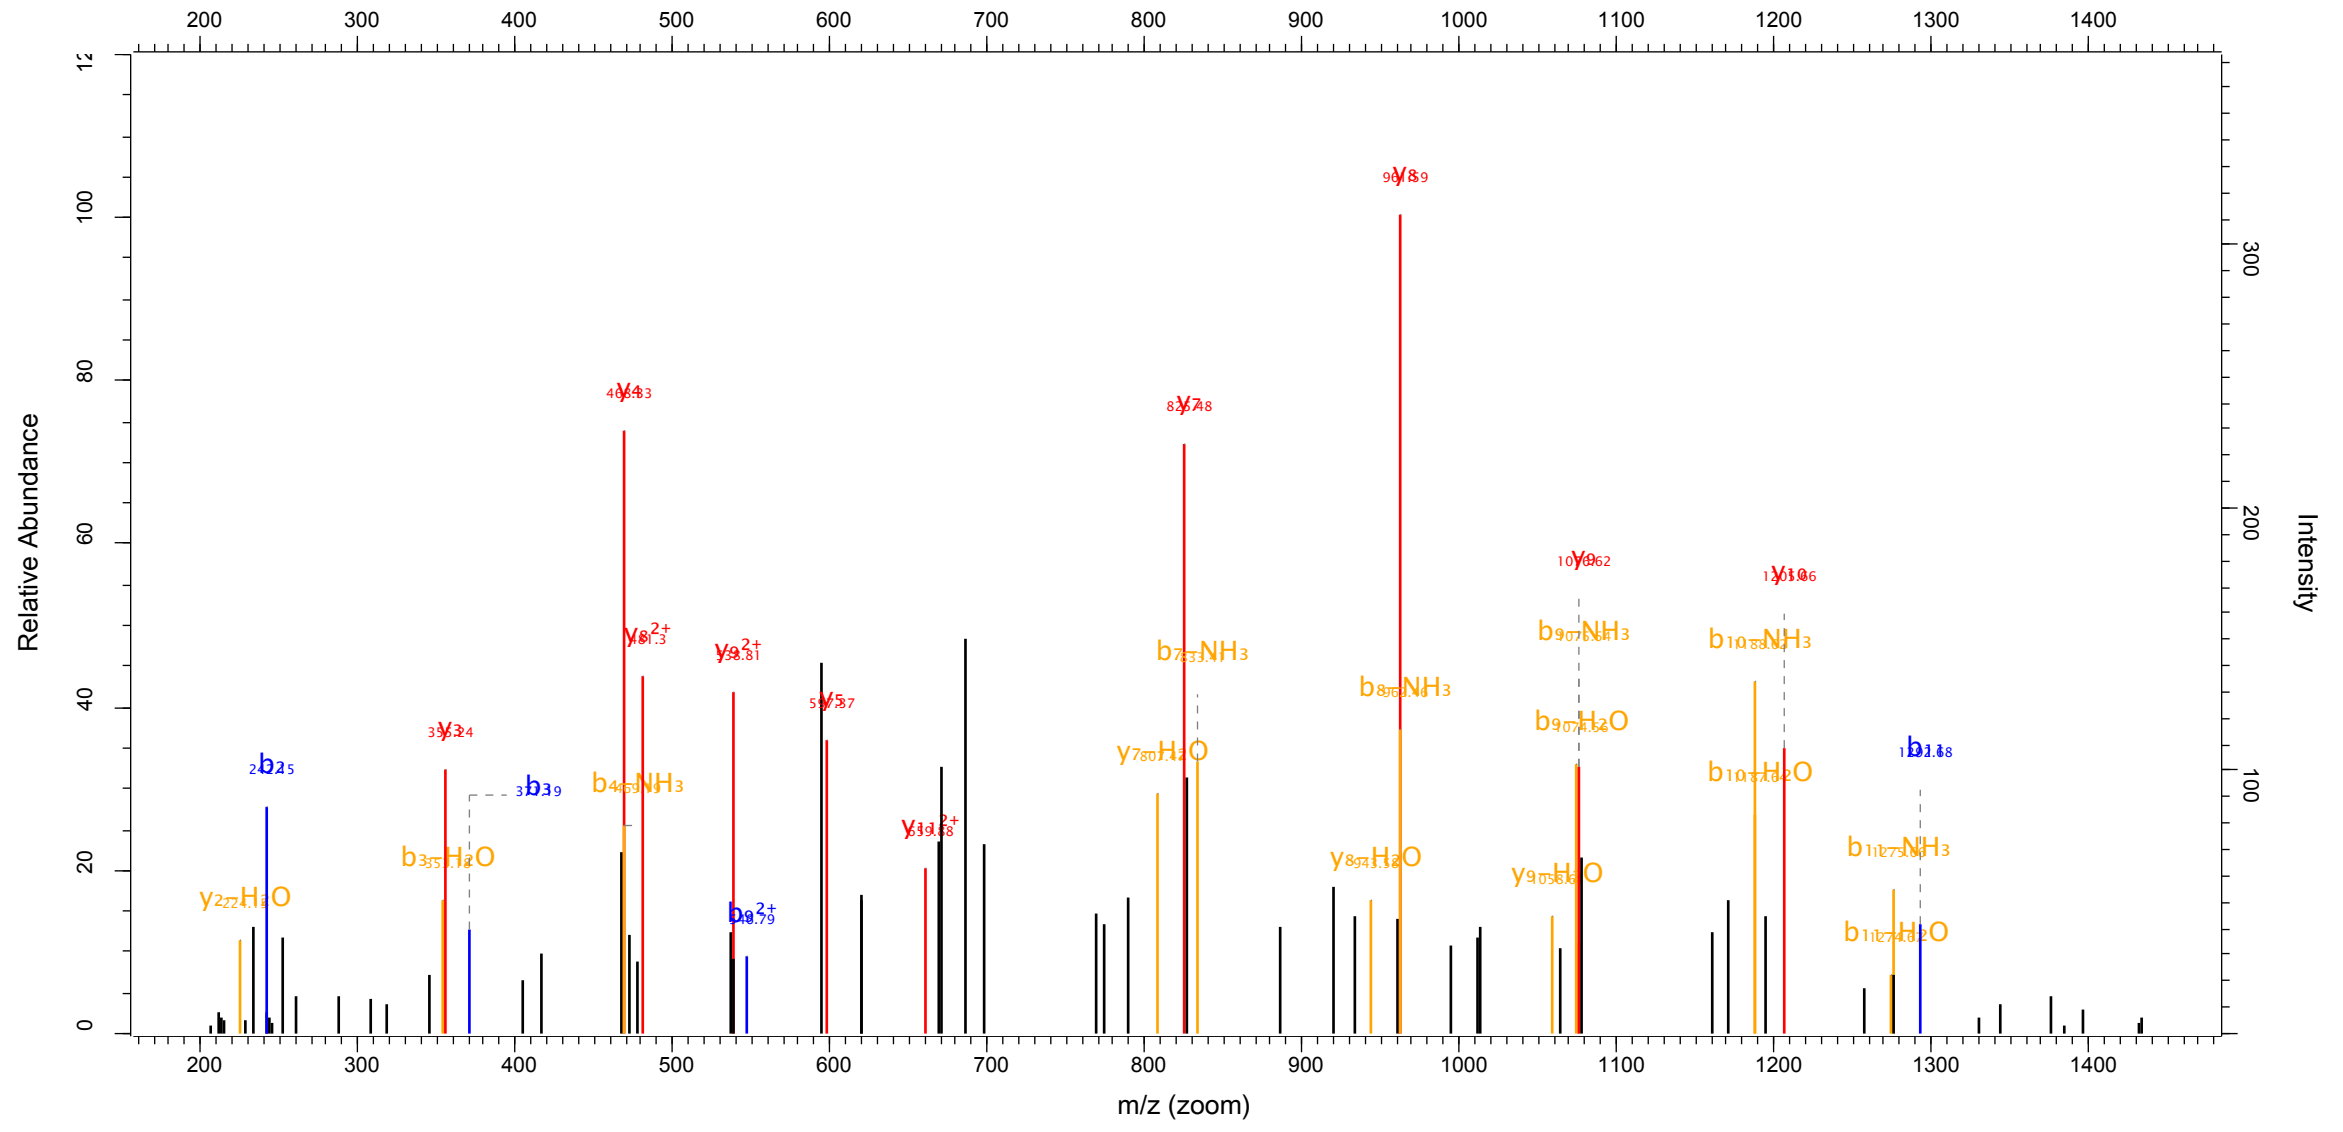

Scan number  
Method

22098  
ITMS; CID

Raw file  
Pepti...

nak\_ubx4LightSAX1\_11 nov01  
132.57

Protein Group 914

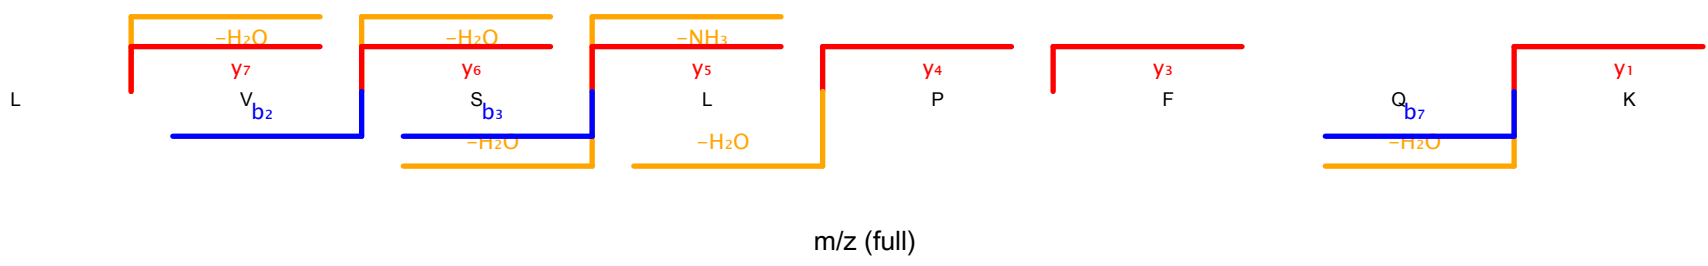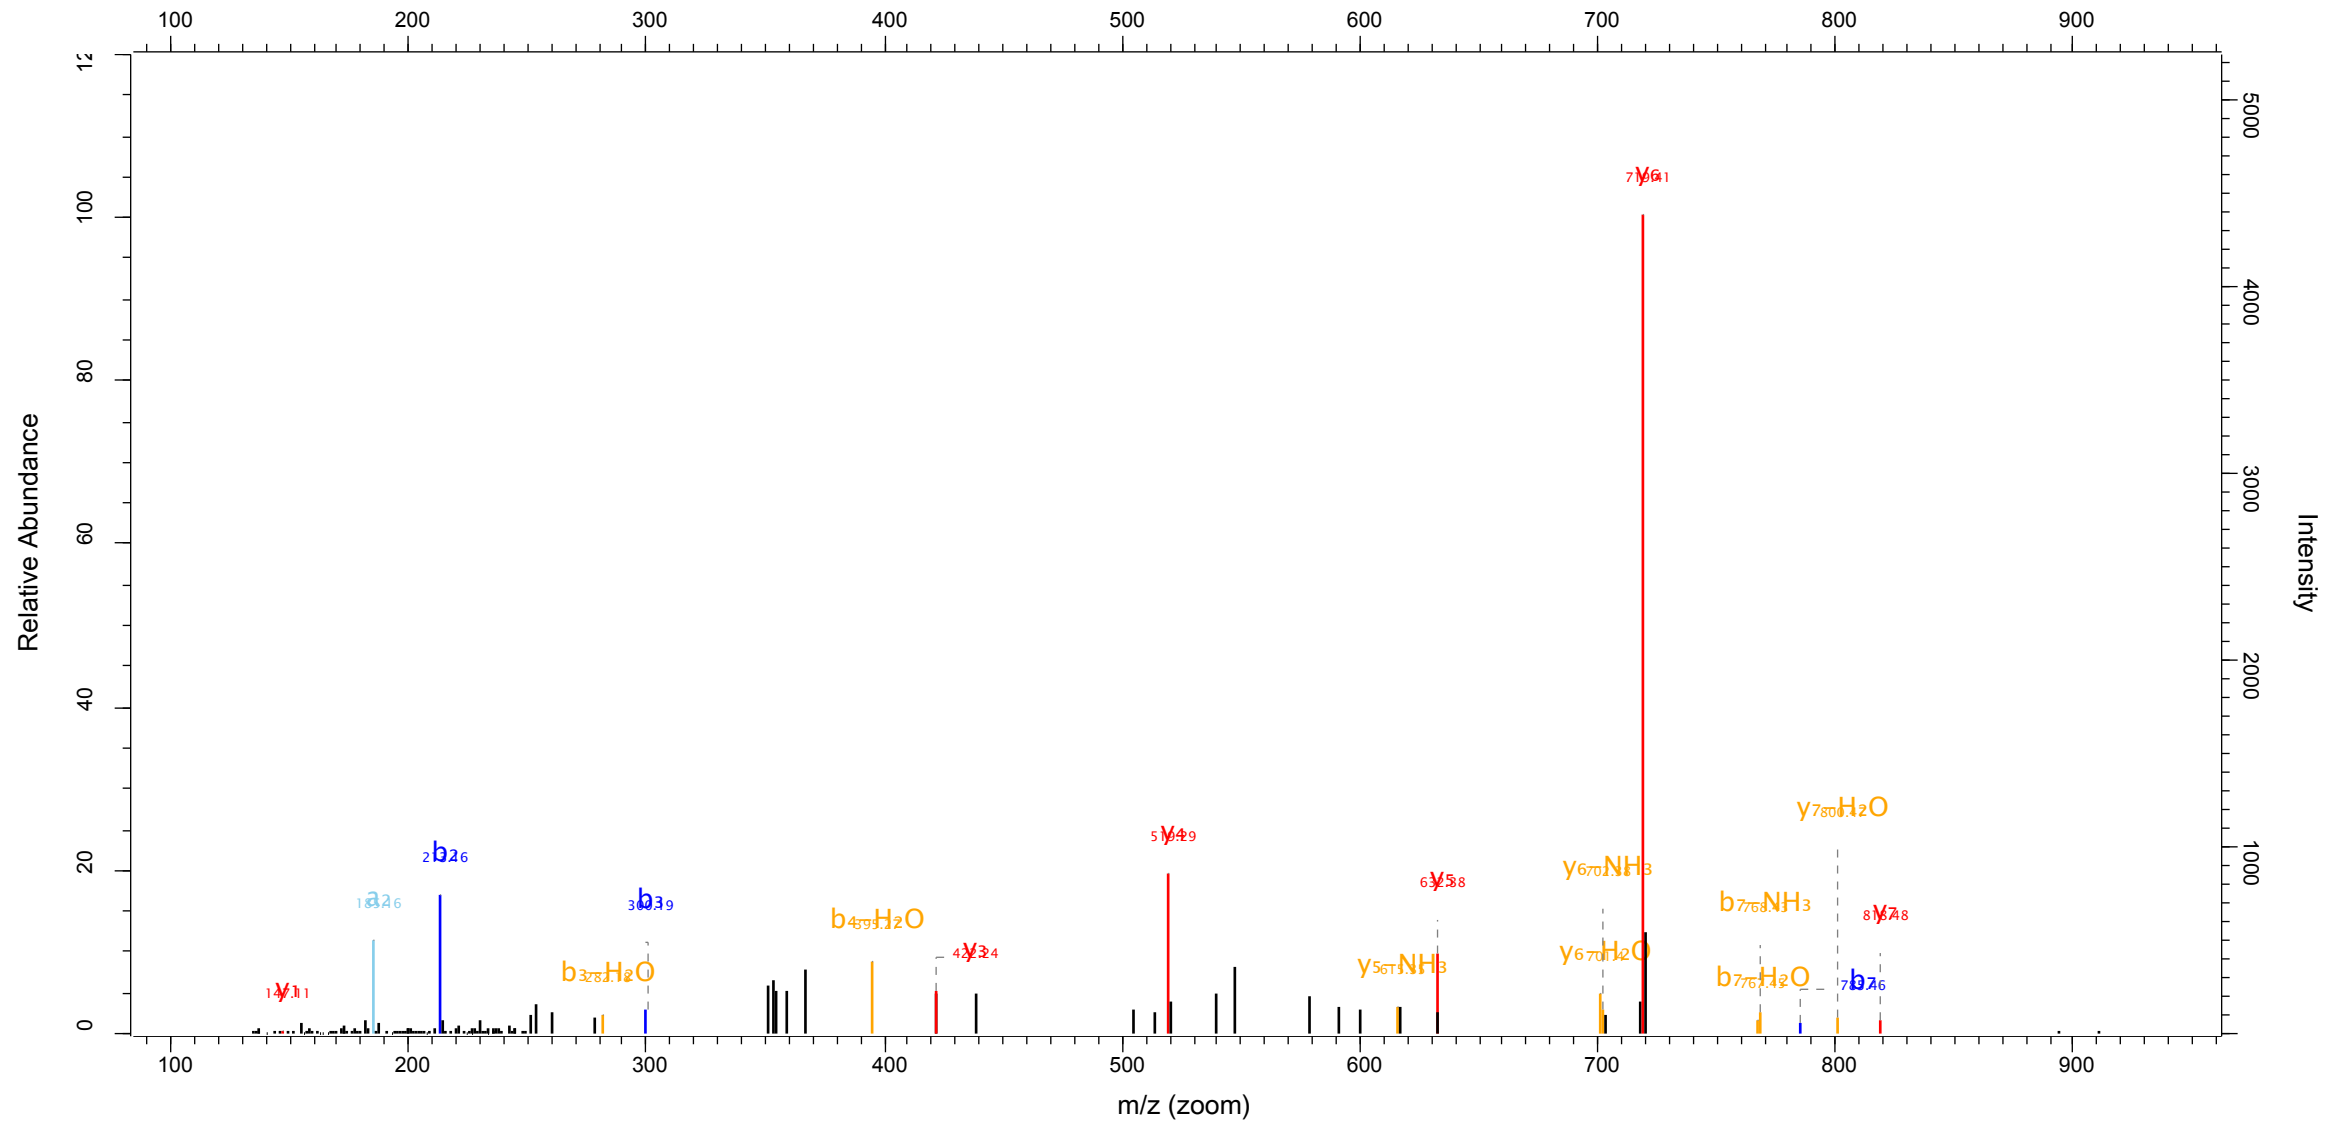



Scan number  
Method

12891  
ITMS; CID

Raw file  
Pepti...

nak\_cdc48UbconjugatesSAX1\_21may12  
104.17

Protein Group 921

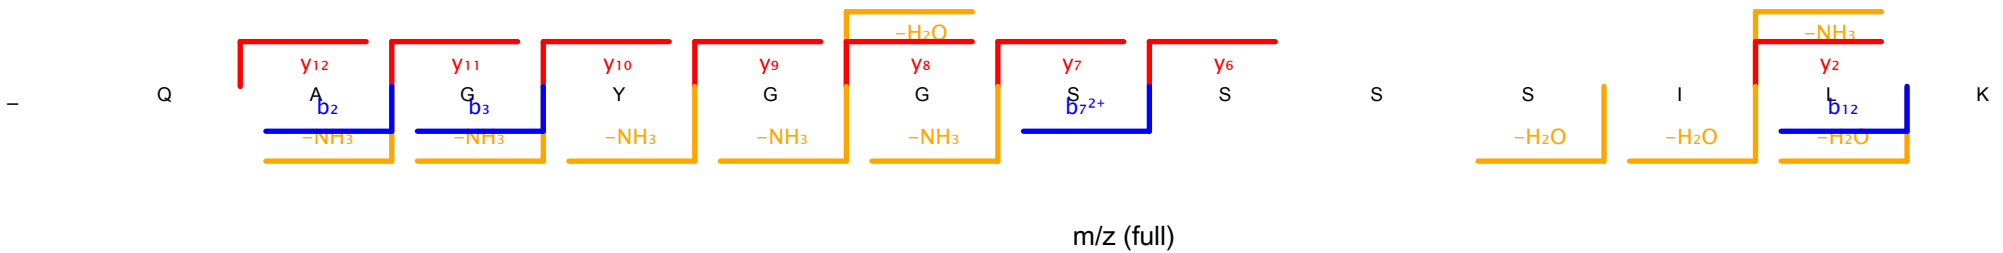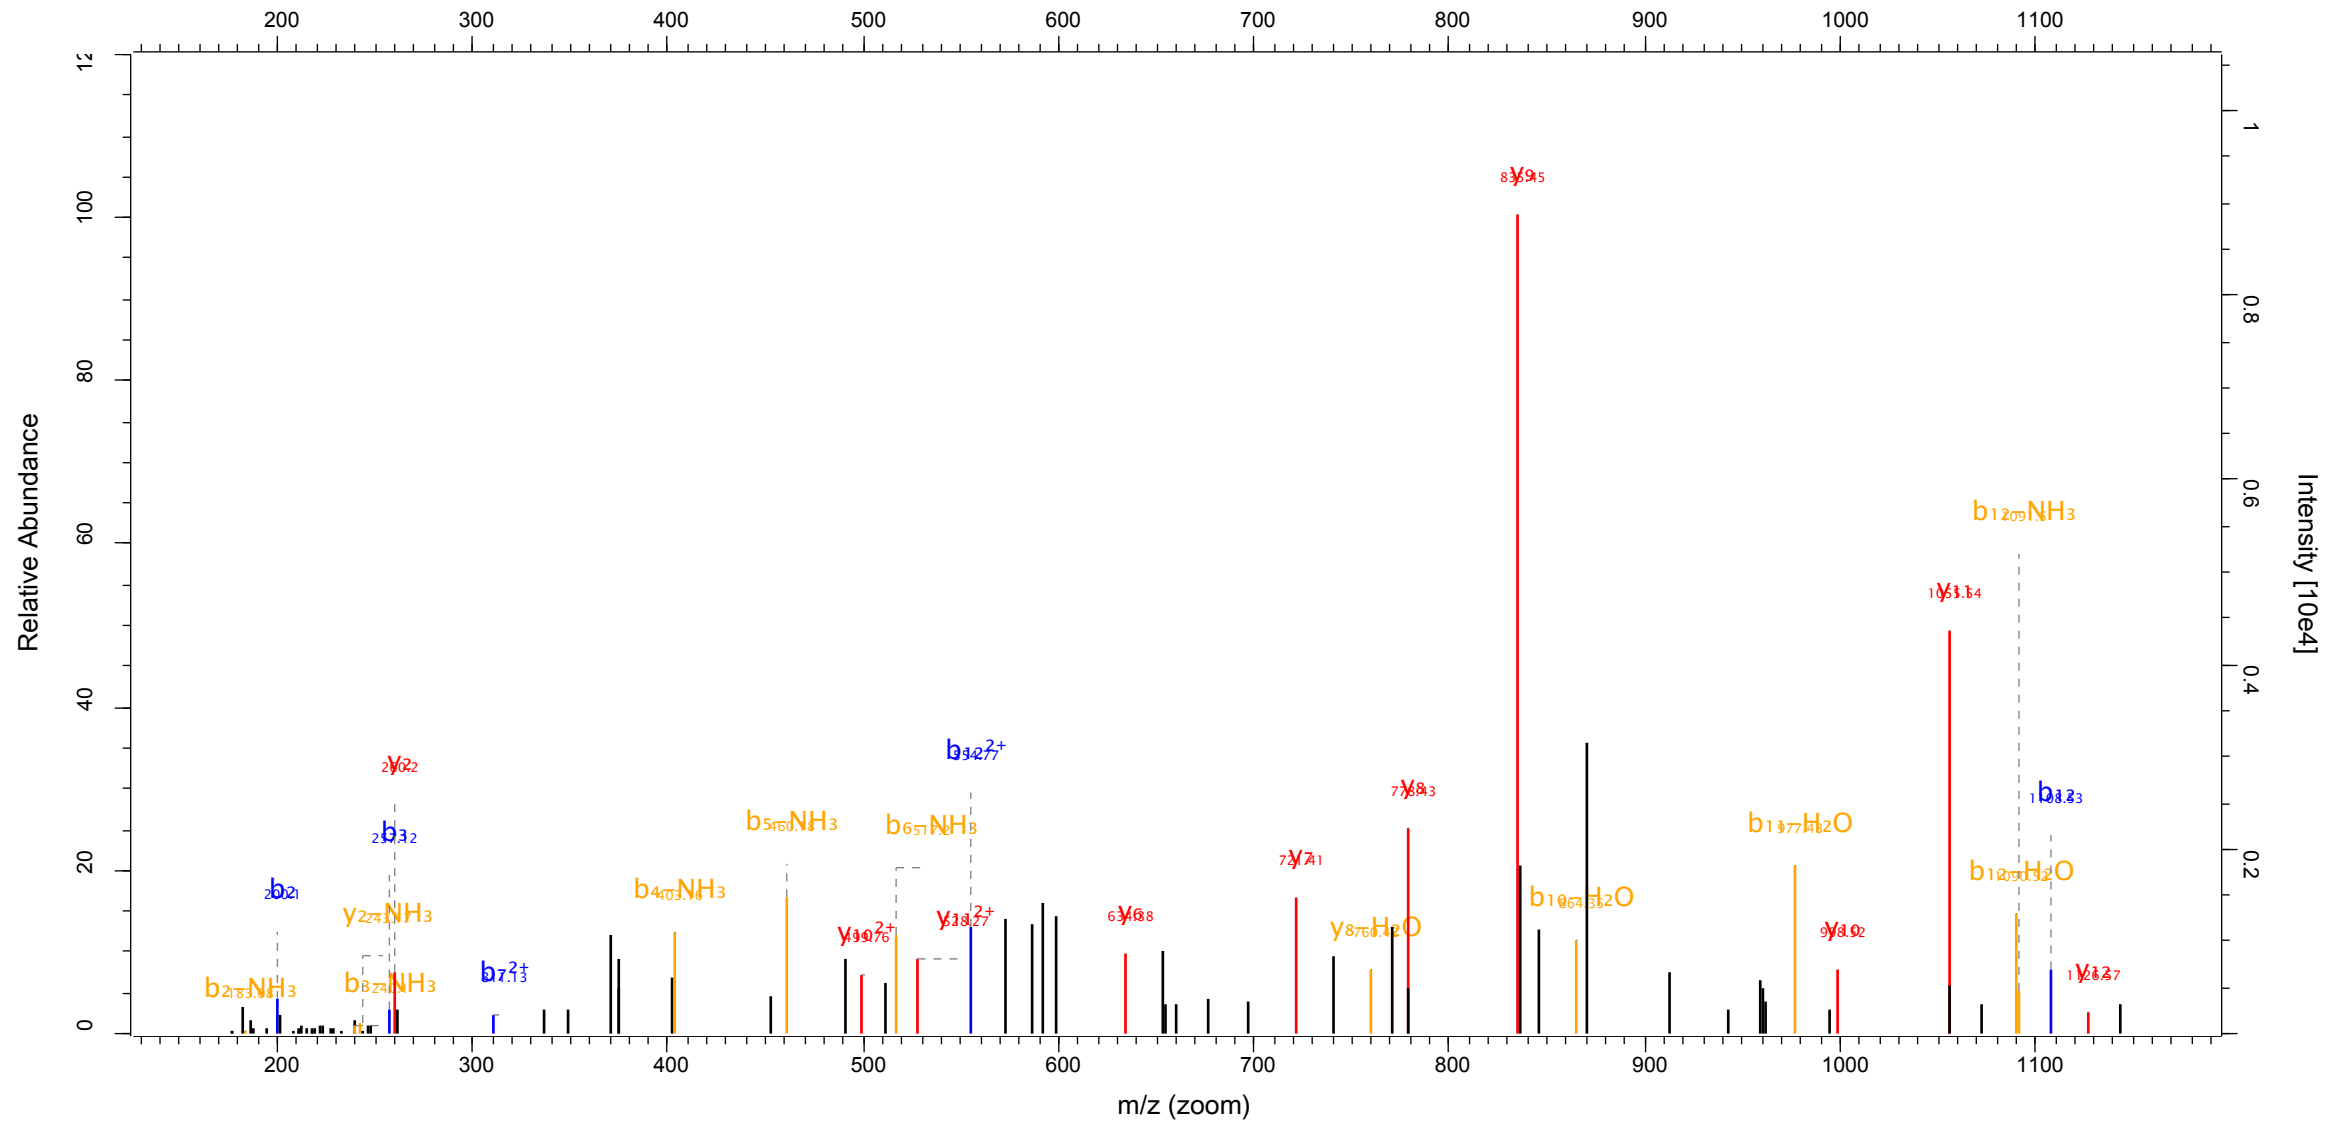

Scan number 14525 Raw file nak\_ubx5L\_SAX6\_08Sep6  
 Method ITMS; CID Pepti... 55.01

Protein Group 929

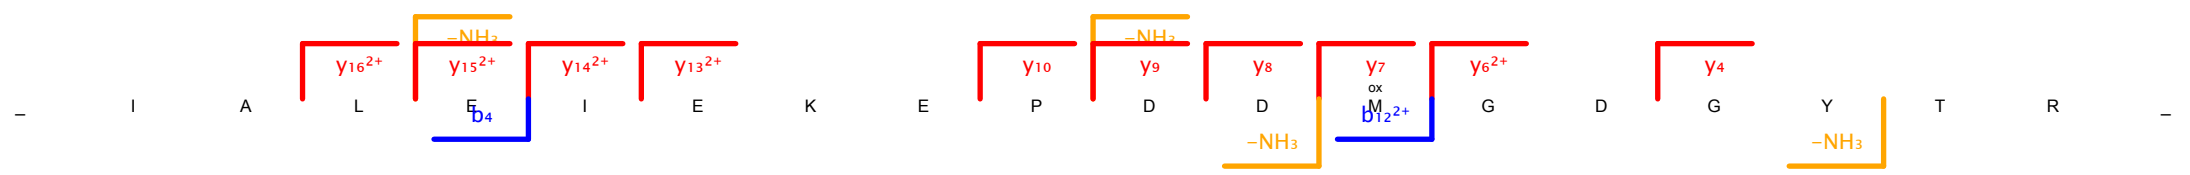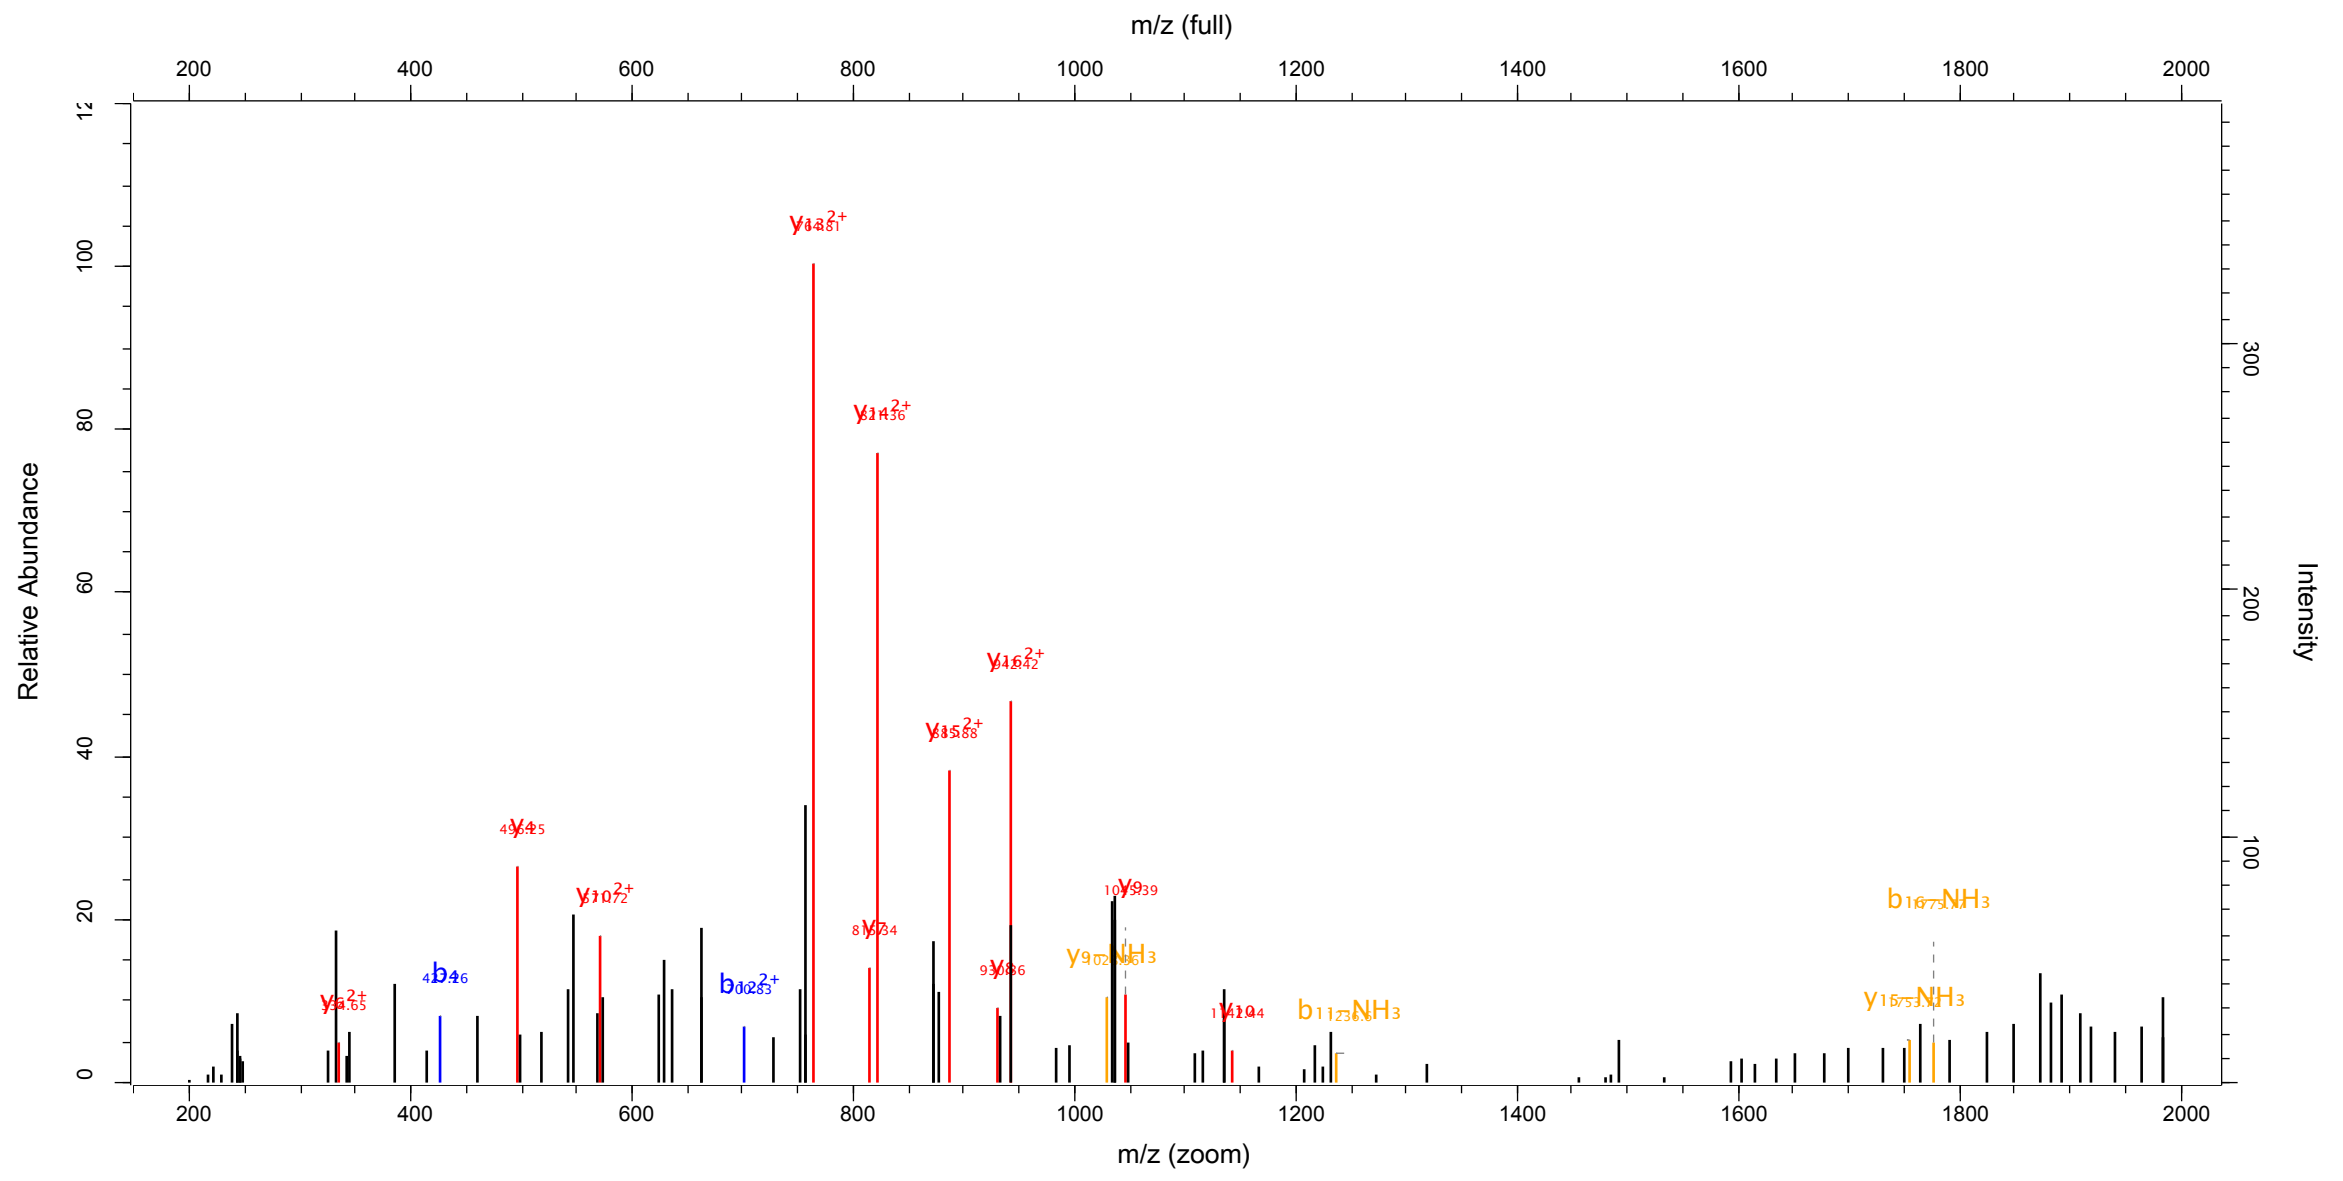

Scan number  
Method

39782  
ITMS; CID

Raw file  
Pepti...

nak\_UBX7LSAX1\_20Jan11\_1  
91.85

Protein Group 969

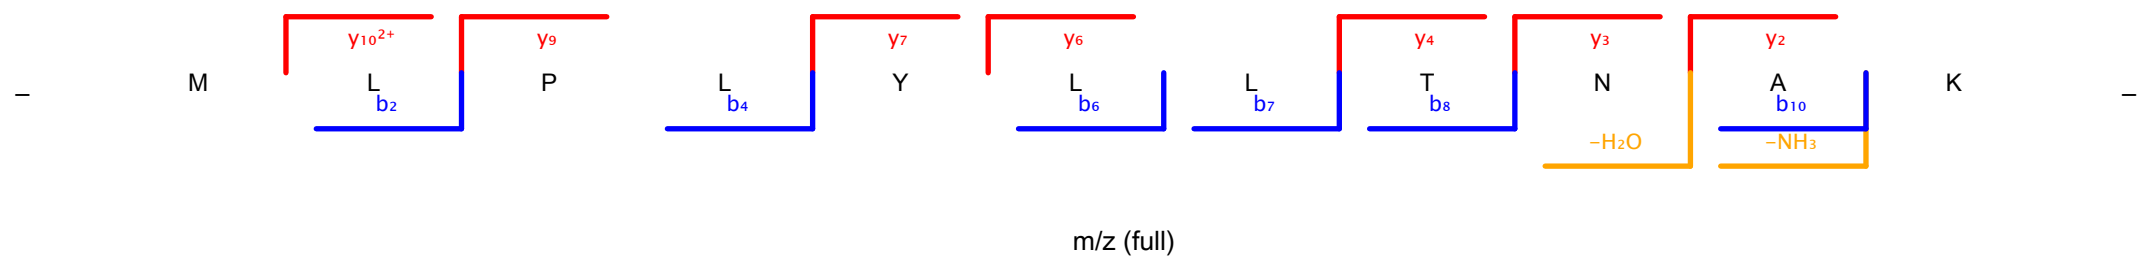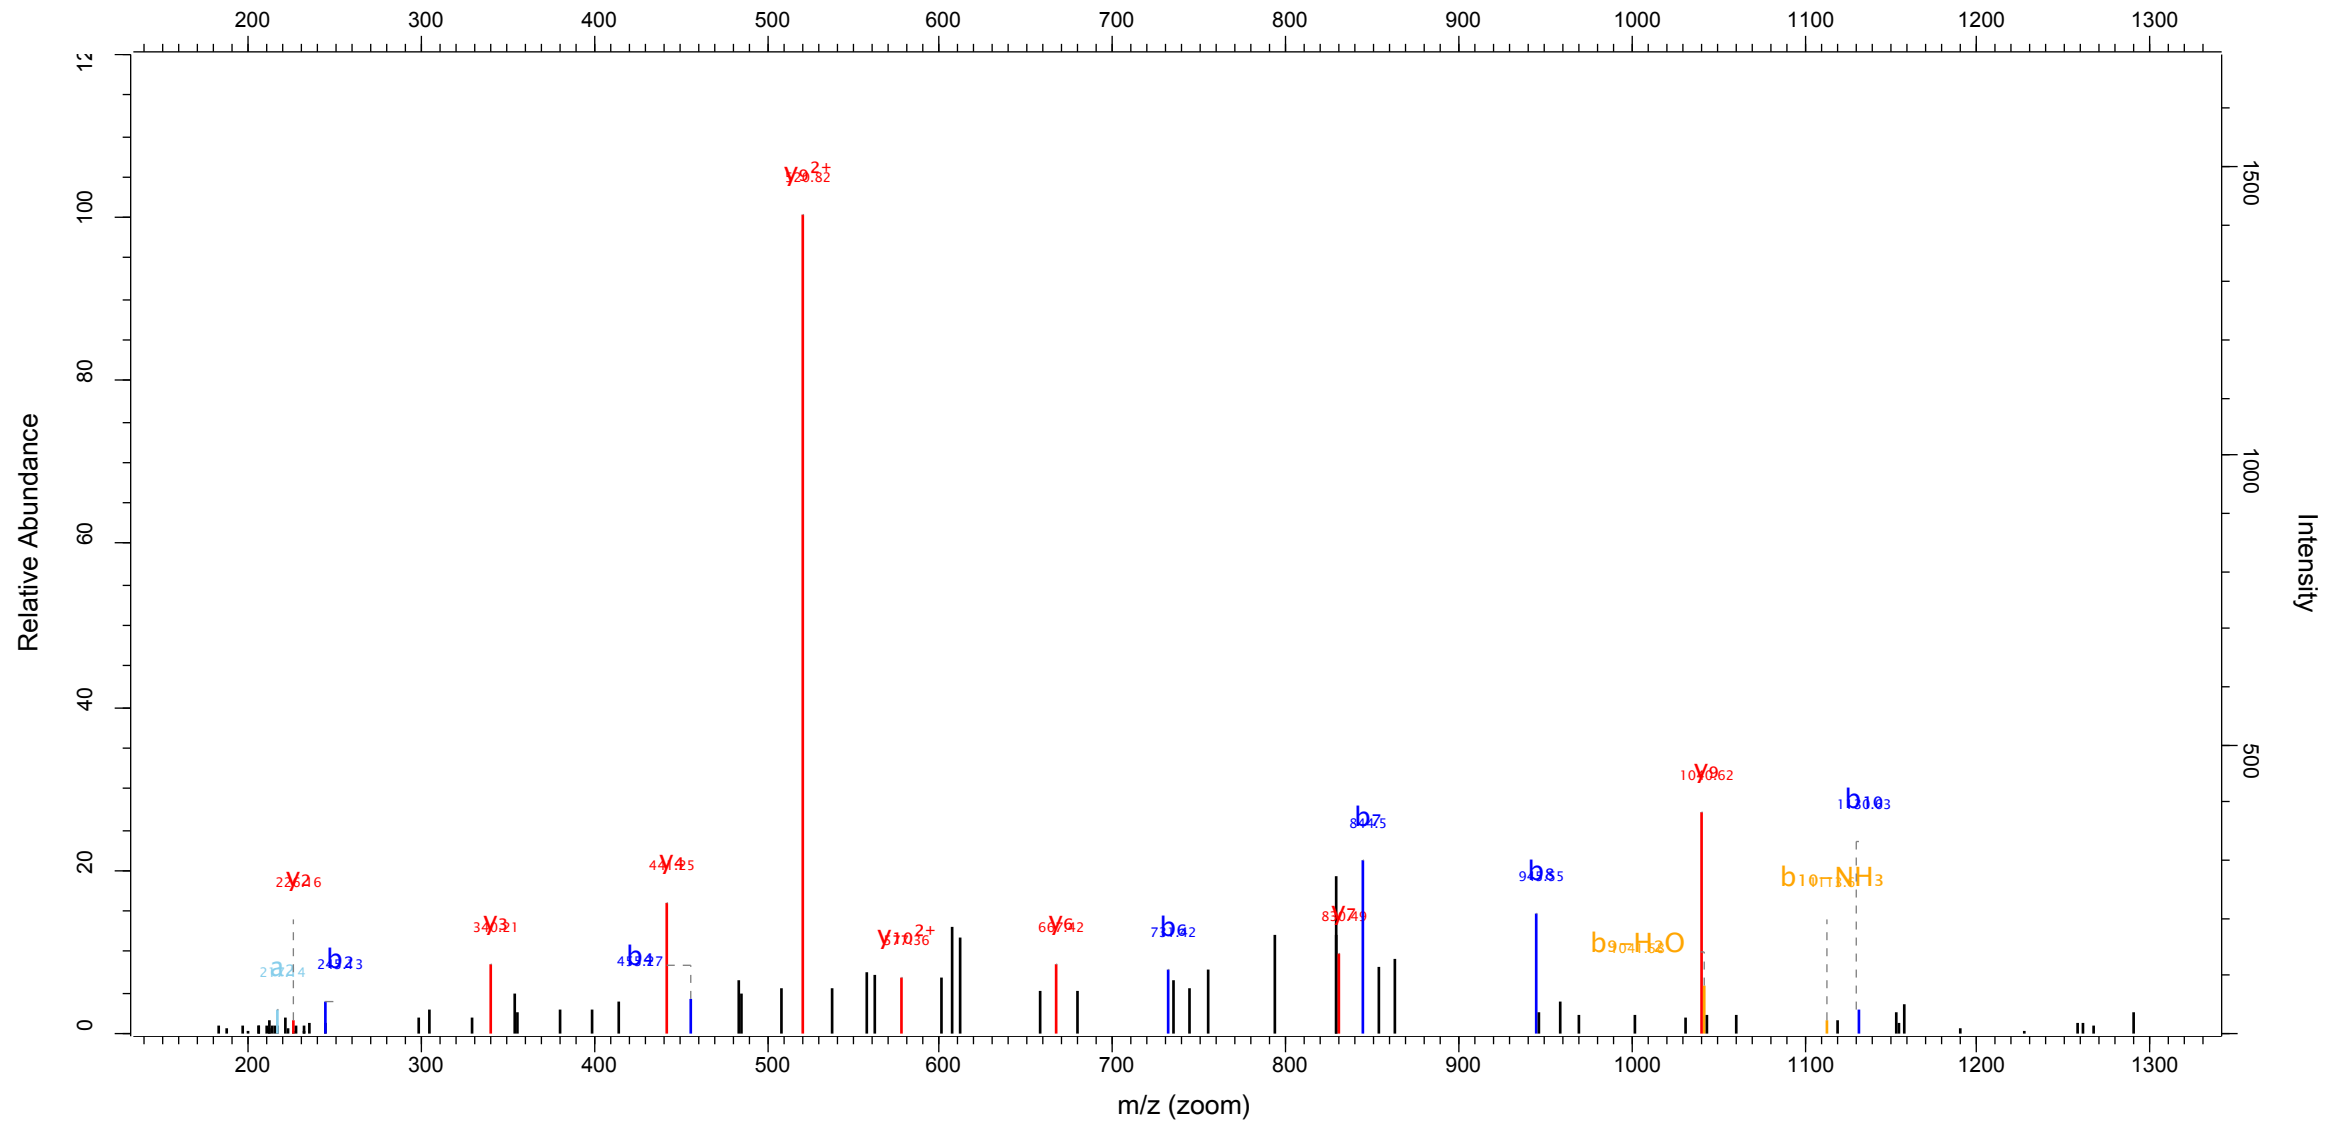

Scan number  
Method

21258  
ITMS; CID

Raw file  
Pepti...

nak\_cdc48UbconjugatesSAX6\_22may10\_7  
133.86

Protein Group 1051

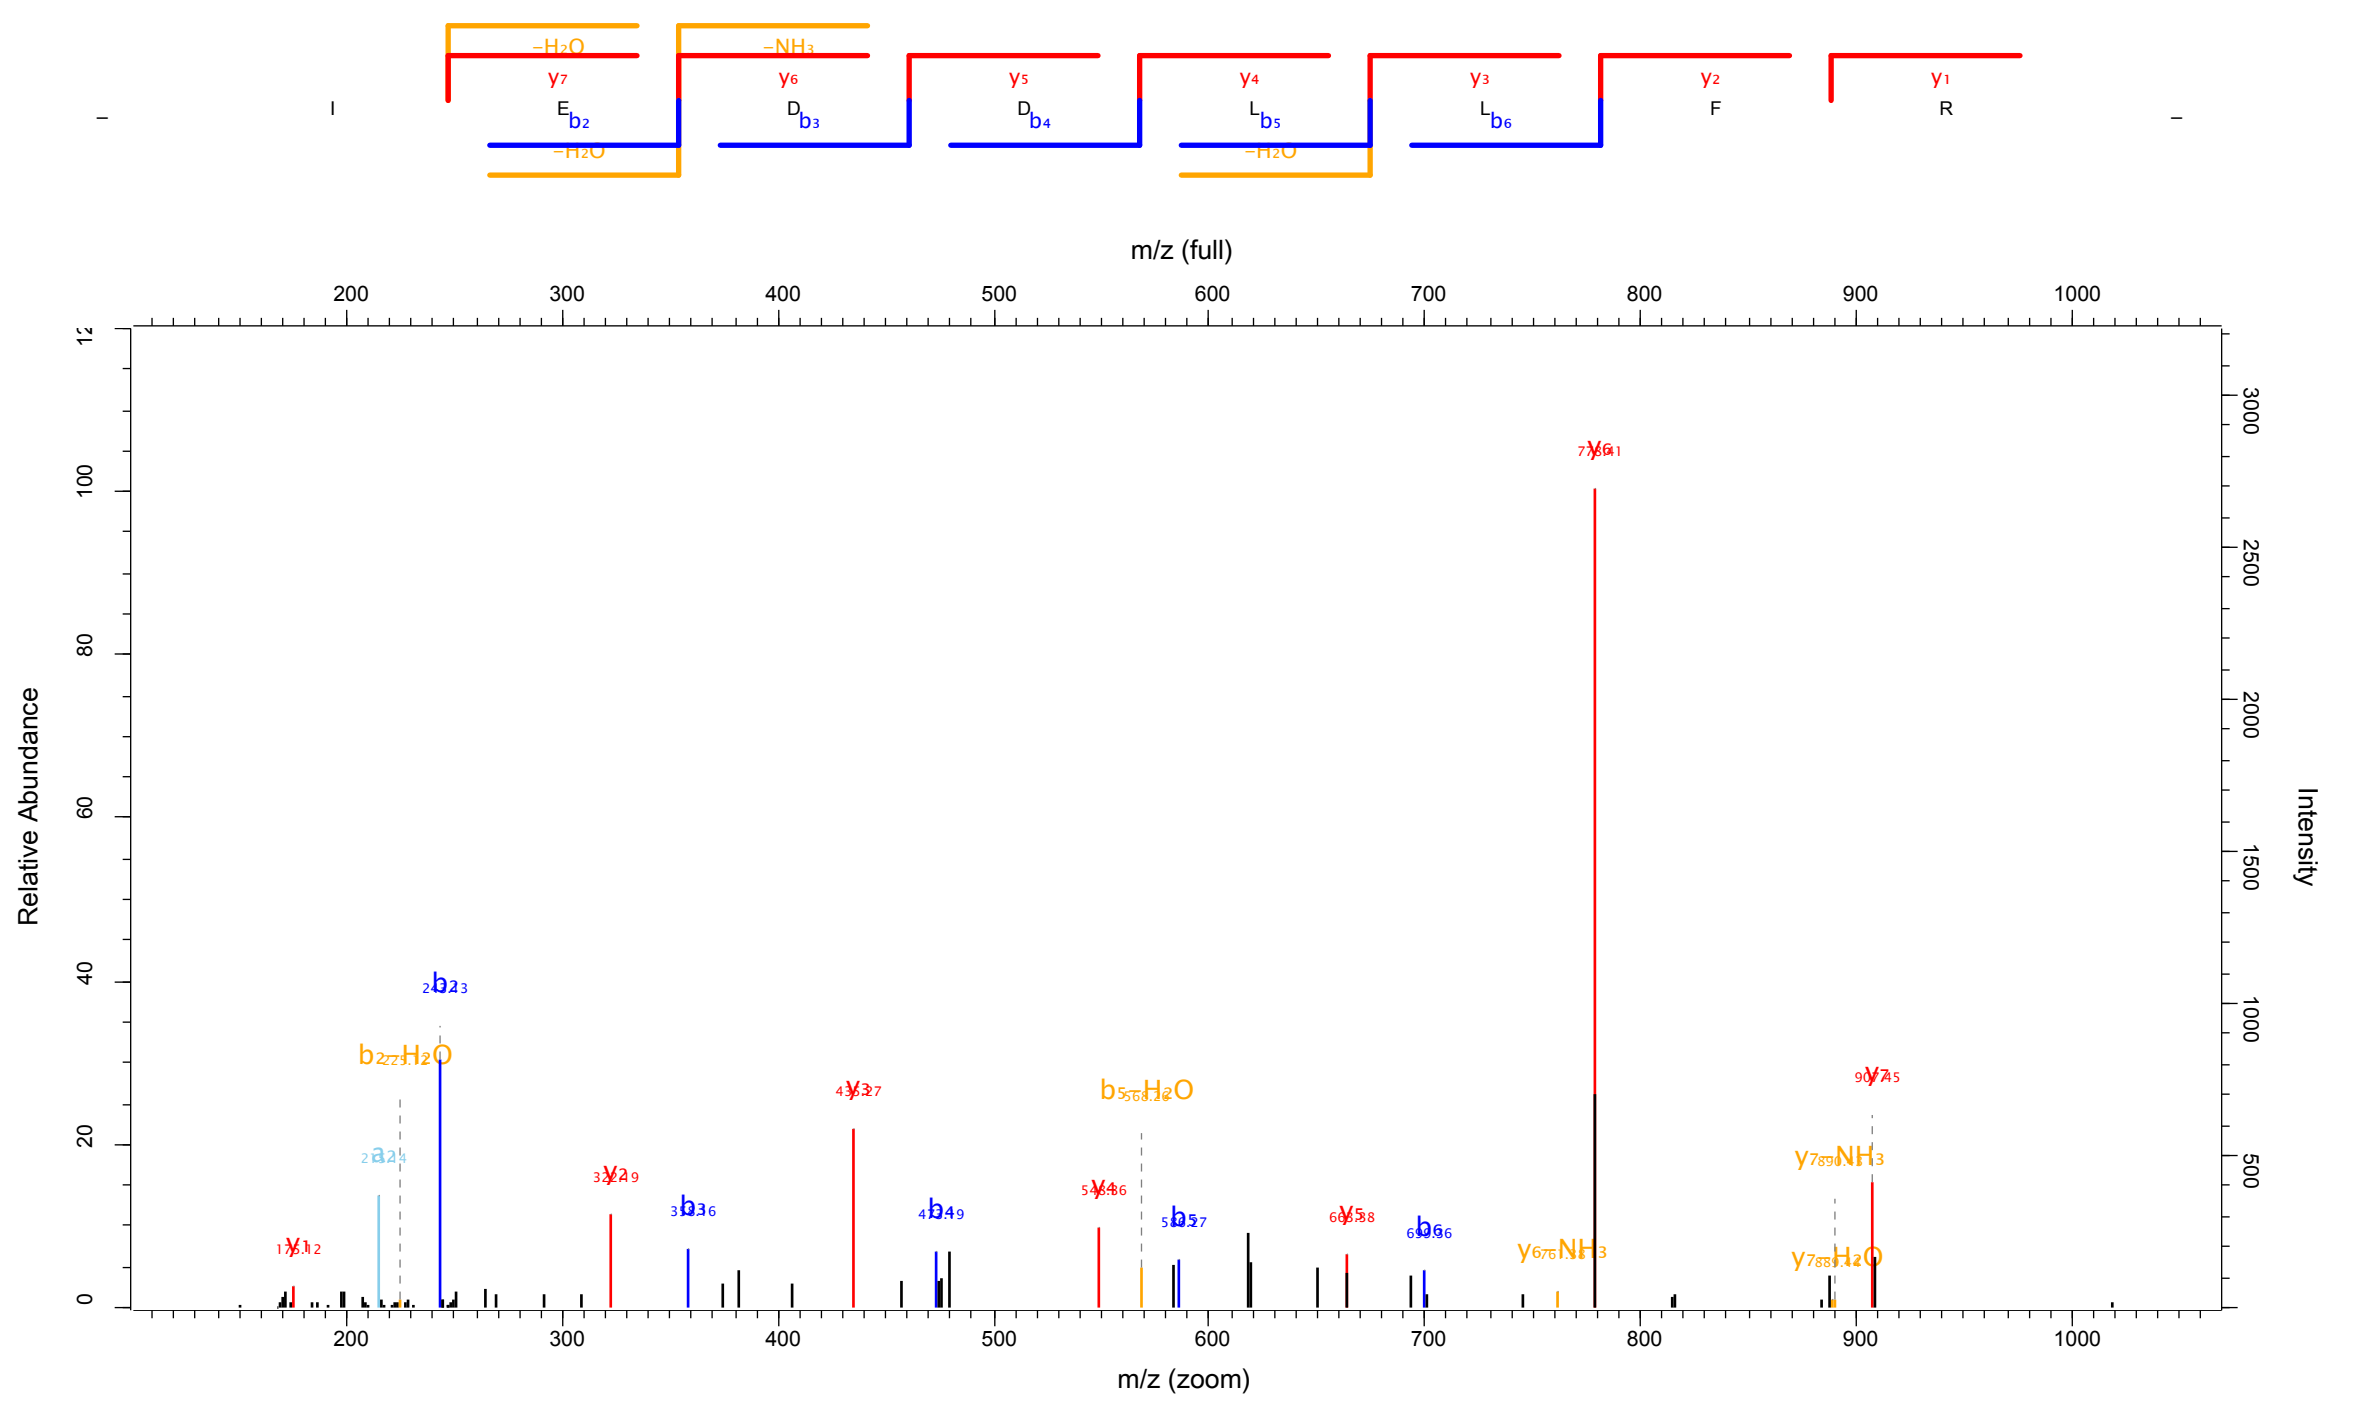

Scan number 6856 Raw file nak\_UBX7HSAX1\_20Jan11\_1  
 Method ITMS; CID Pepti... 178.3

Protein Group 1059

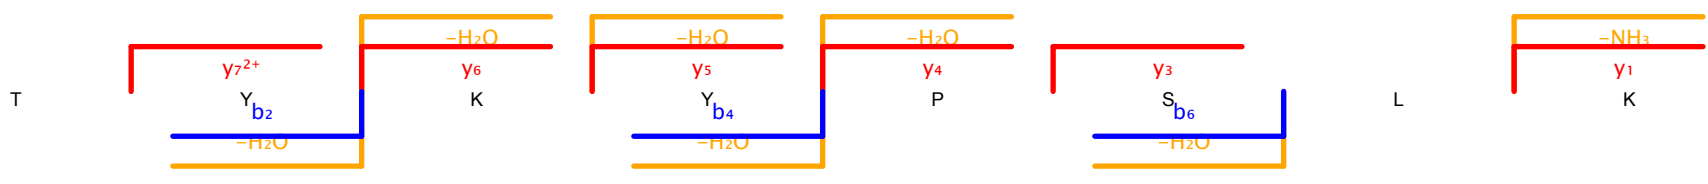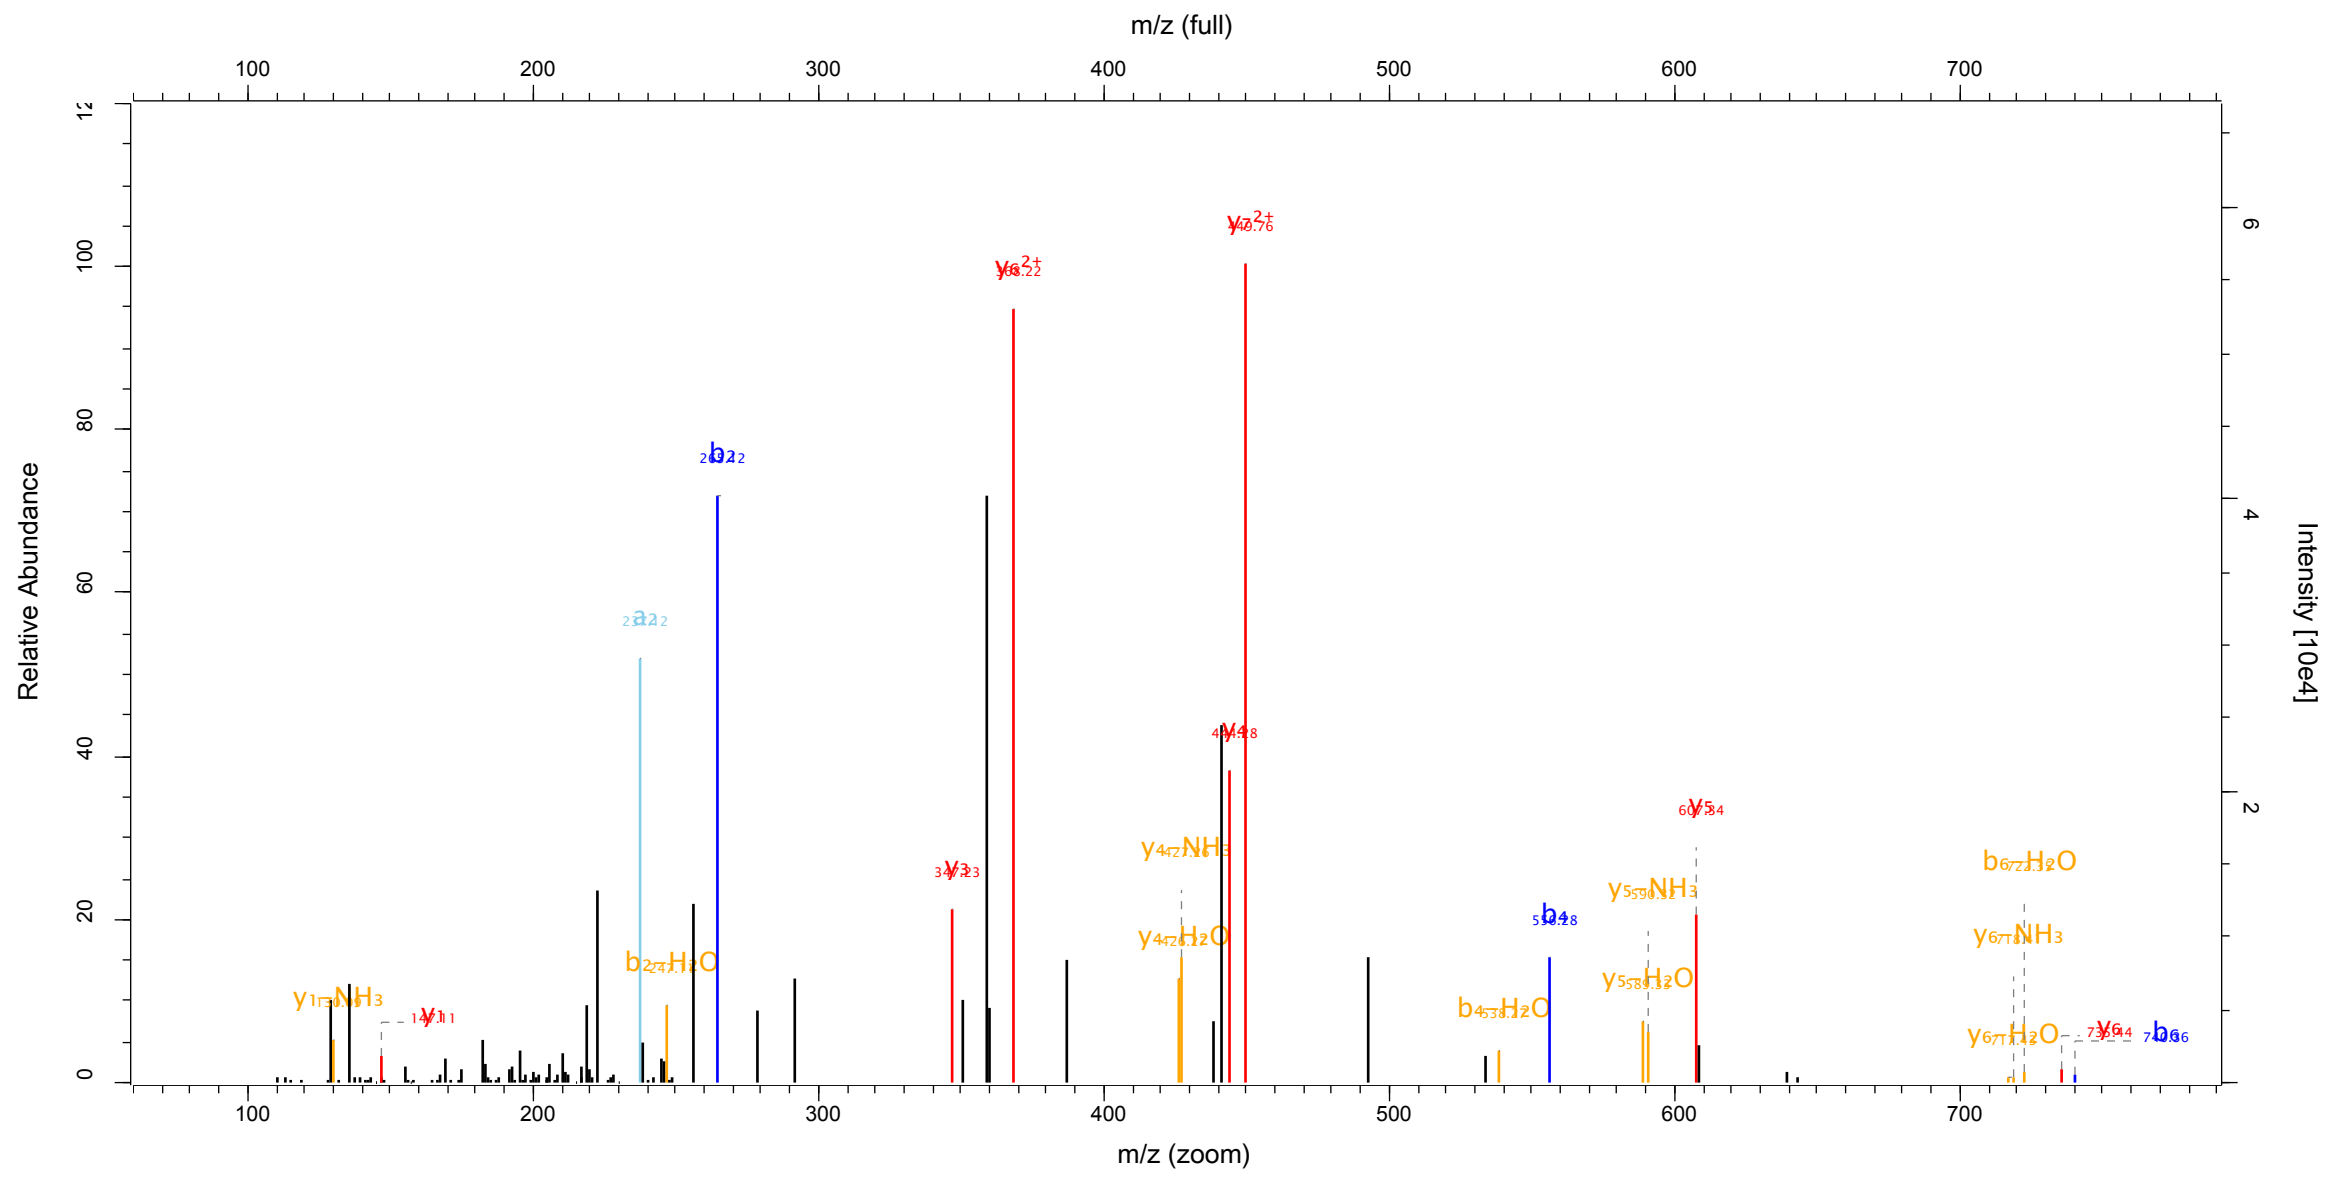

Scan number  
Method

7355  
ITMS; CID

Raw file  
Pepti...

nak\_cdc48UbconjugatesSAX2\_22may10\_3  
156.51

Protein Group 1060

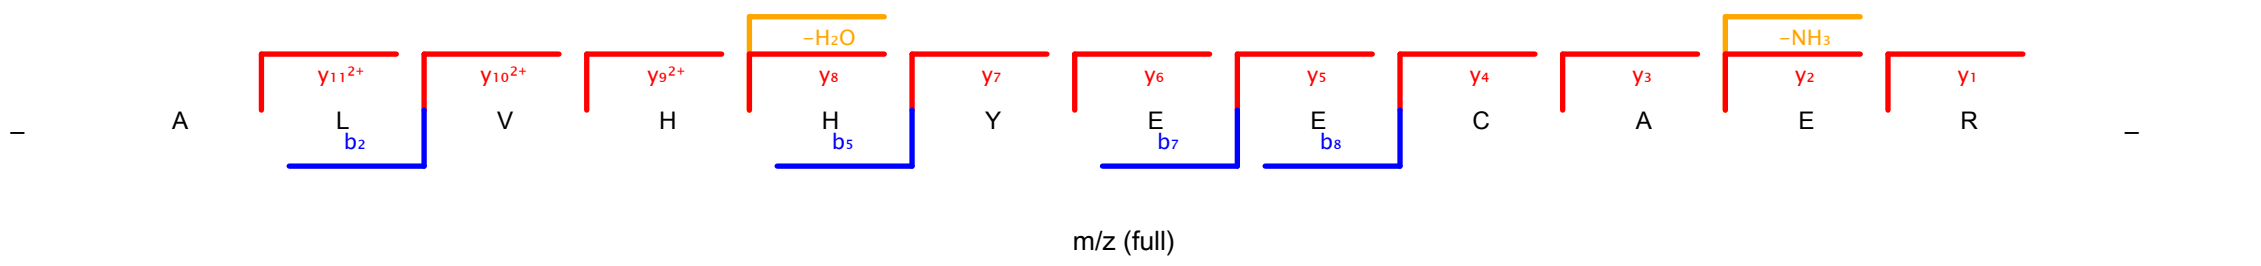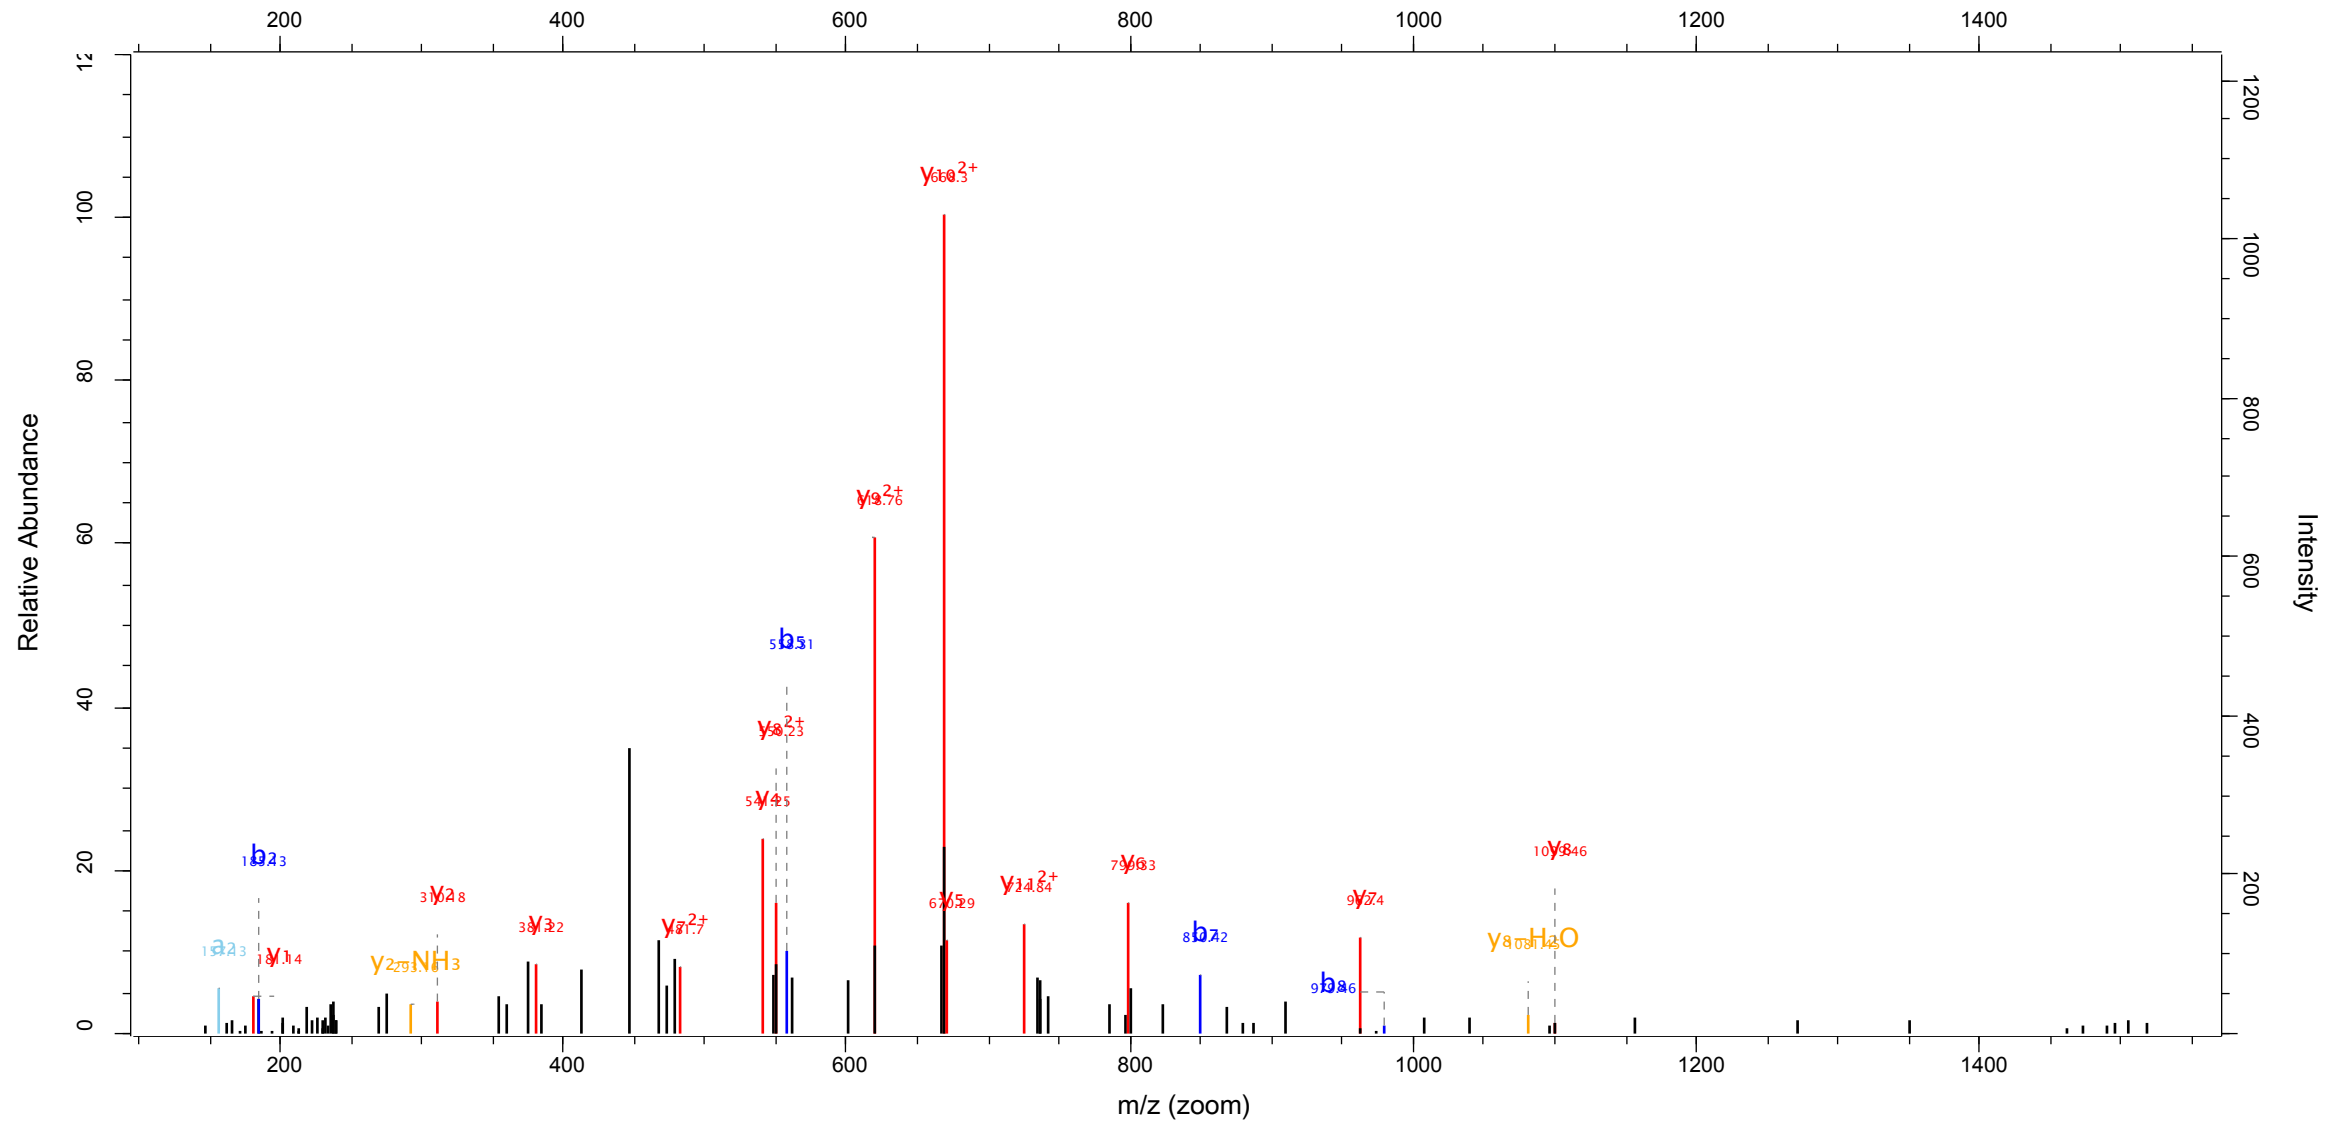

Scan number 26432 Raw file nak\_cdc48UbconjugatesSAX3\_21may14  
 Method ITMS; CID Pepti... 117.86

Protein Group 1067

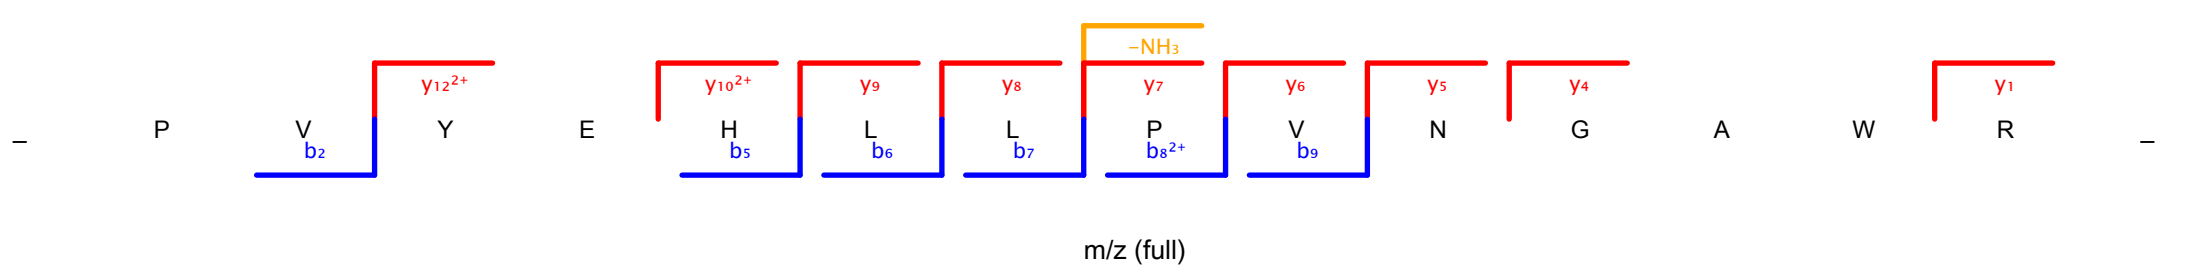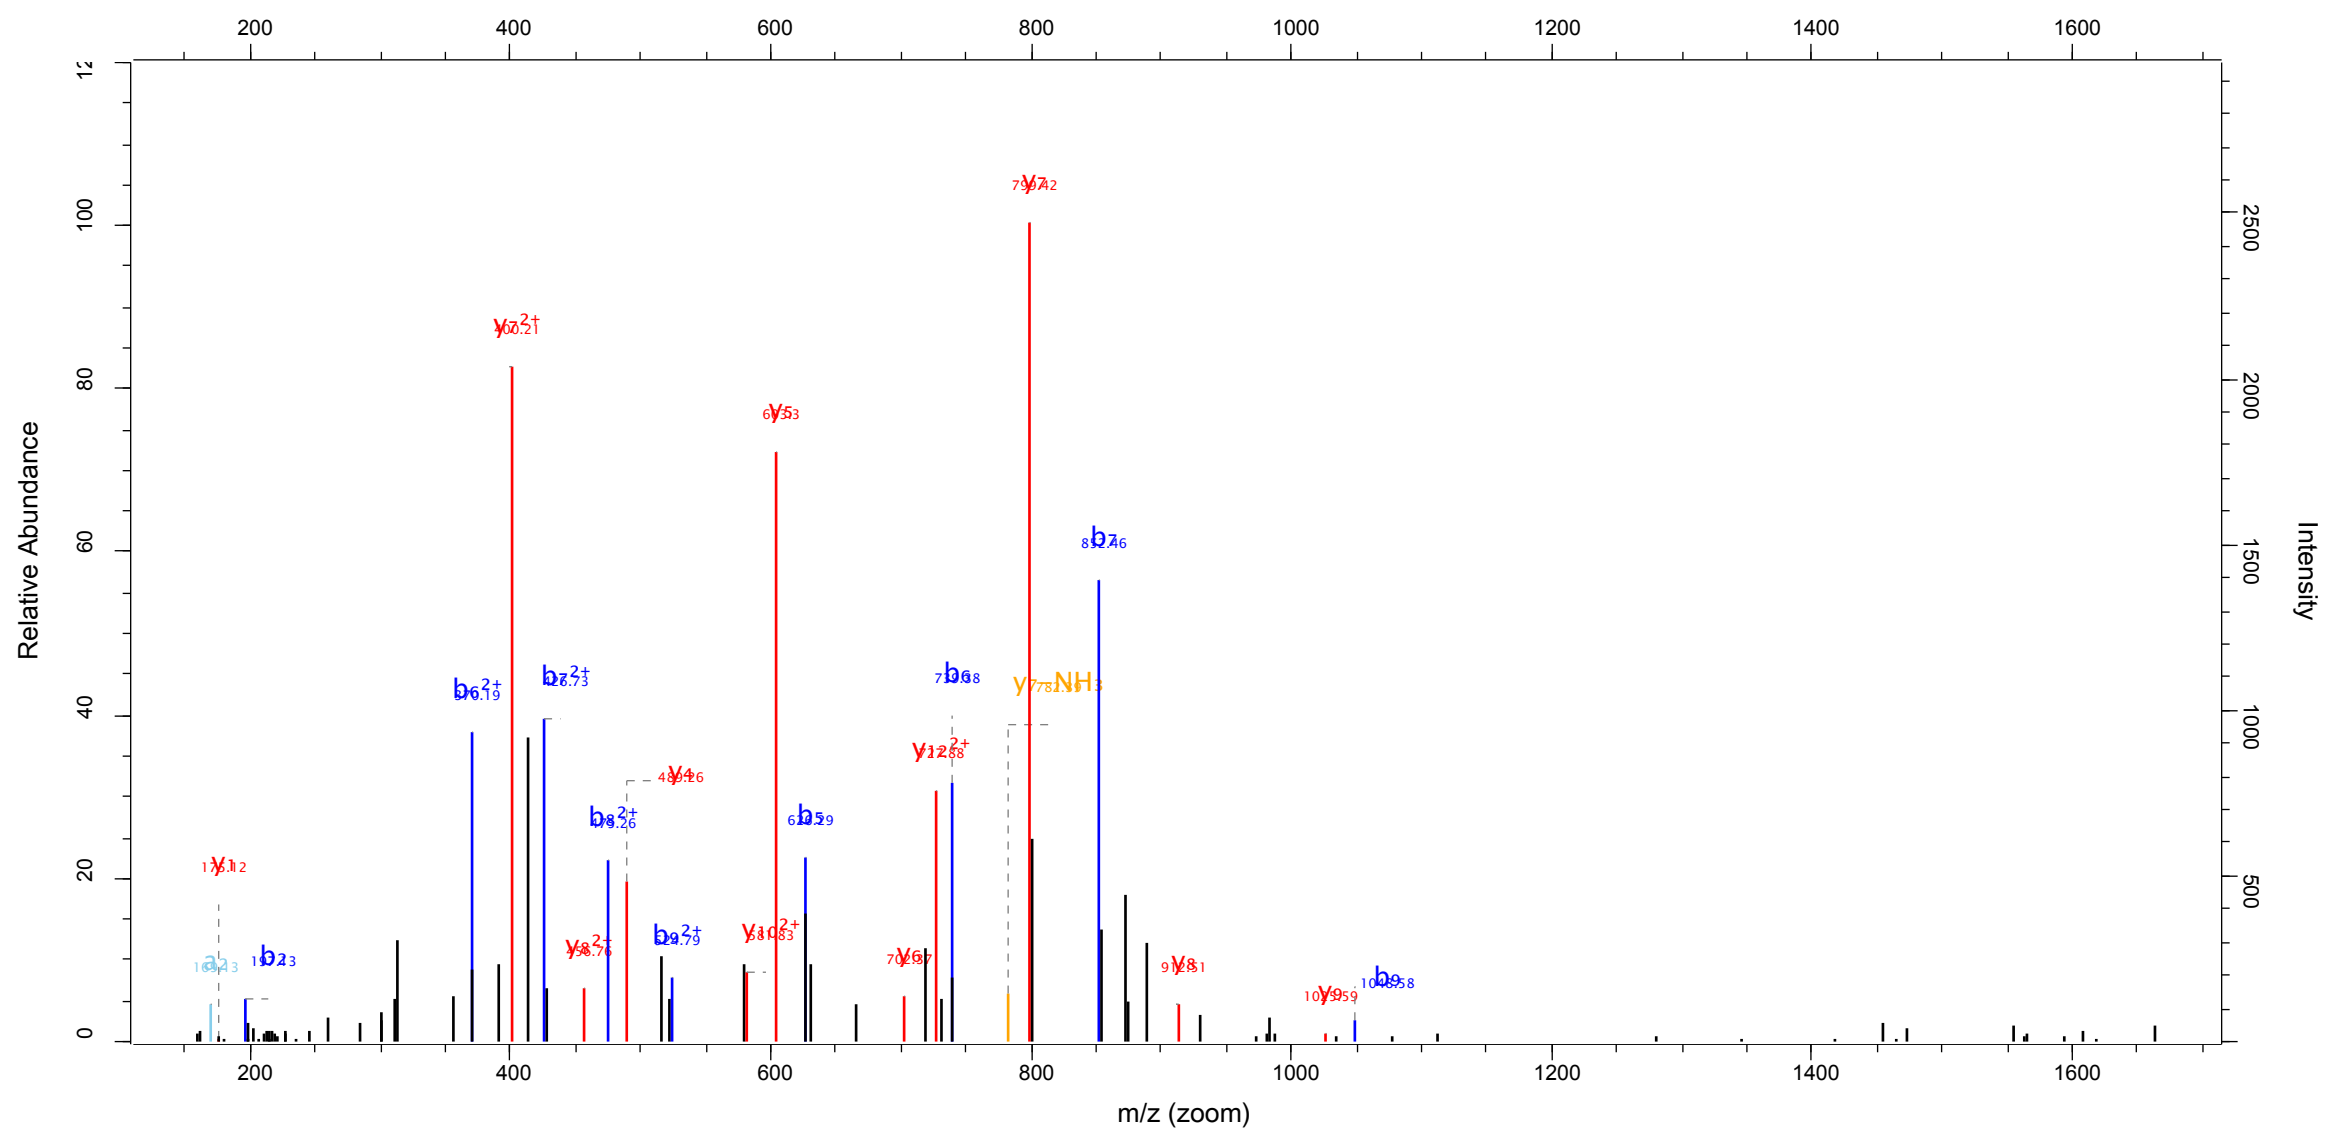

Scan number

22576

Raw file

nak\_WTonetooneSAX4\_4feb11\_04

Protein Group 1105

Method

ITMS; CID

Pepti...

169.3

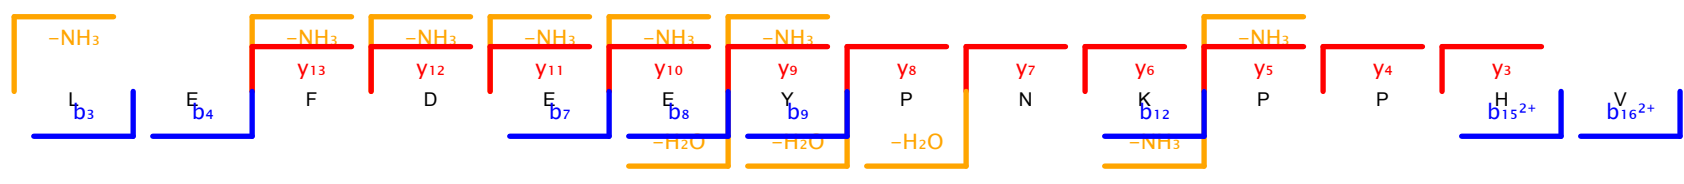

m/z (full)

400 600 800 1000 1200 1400 1600 1800 2000

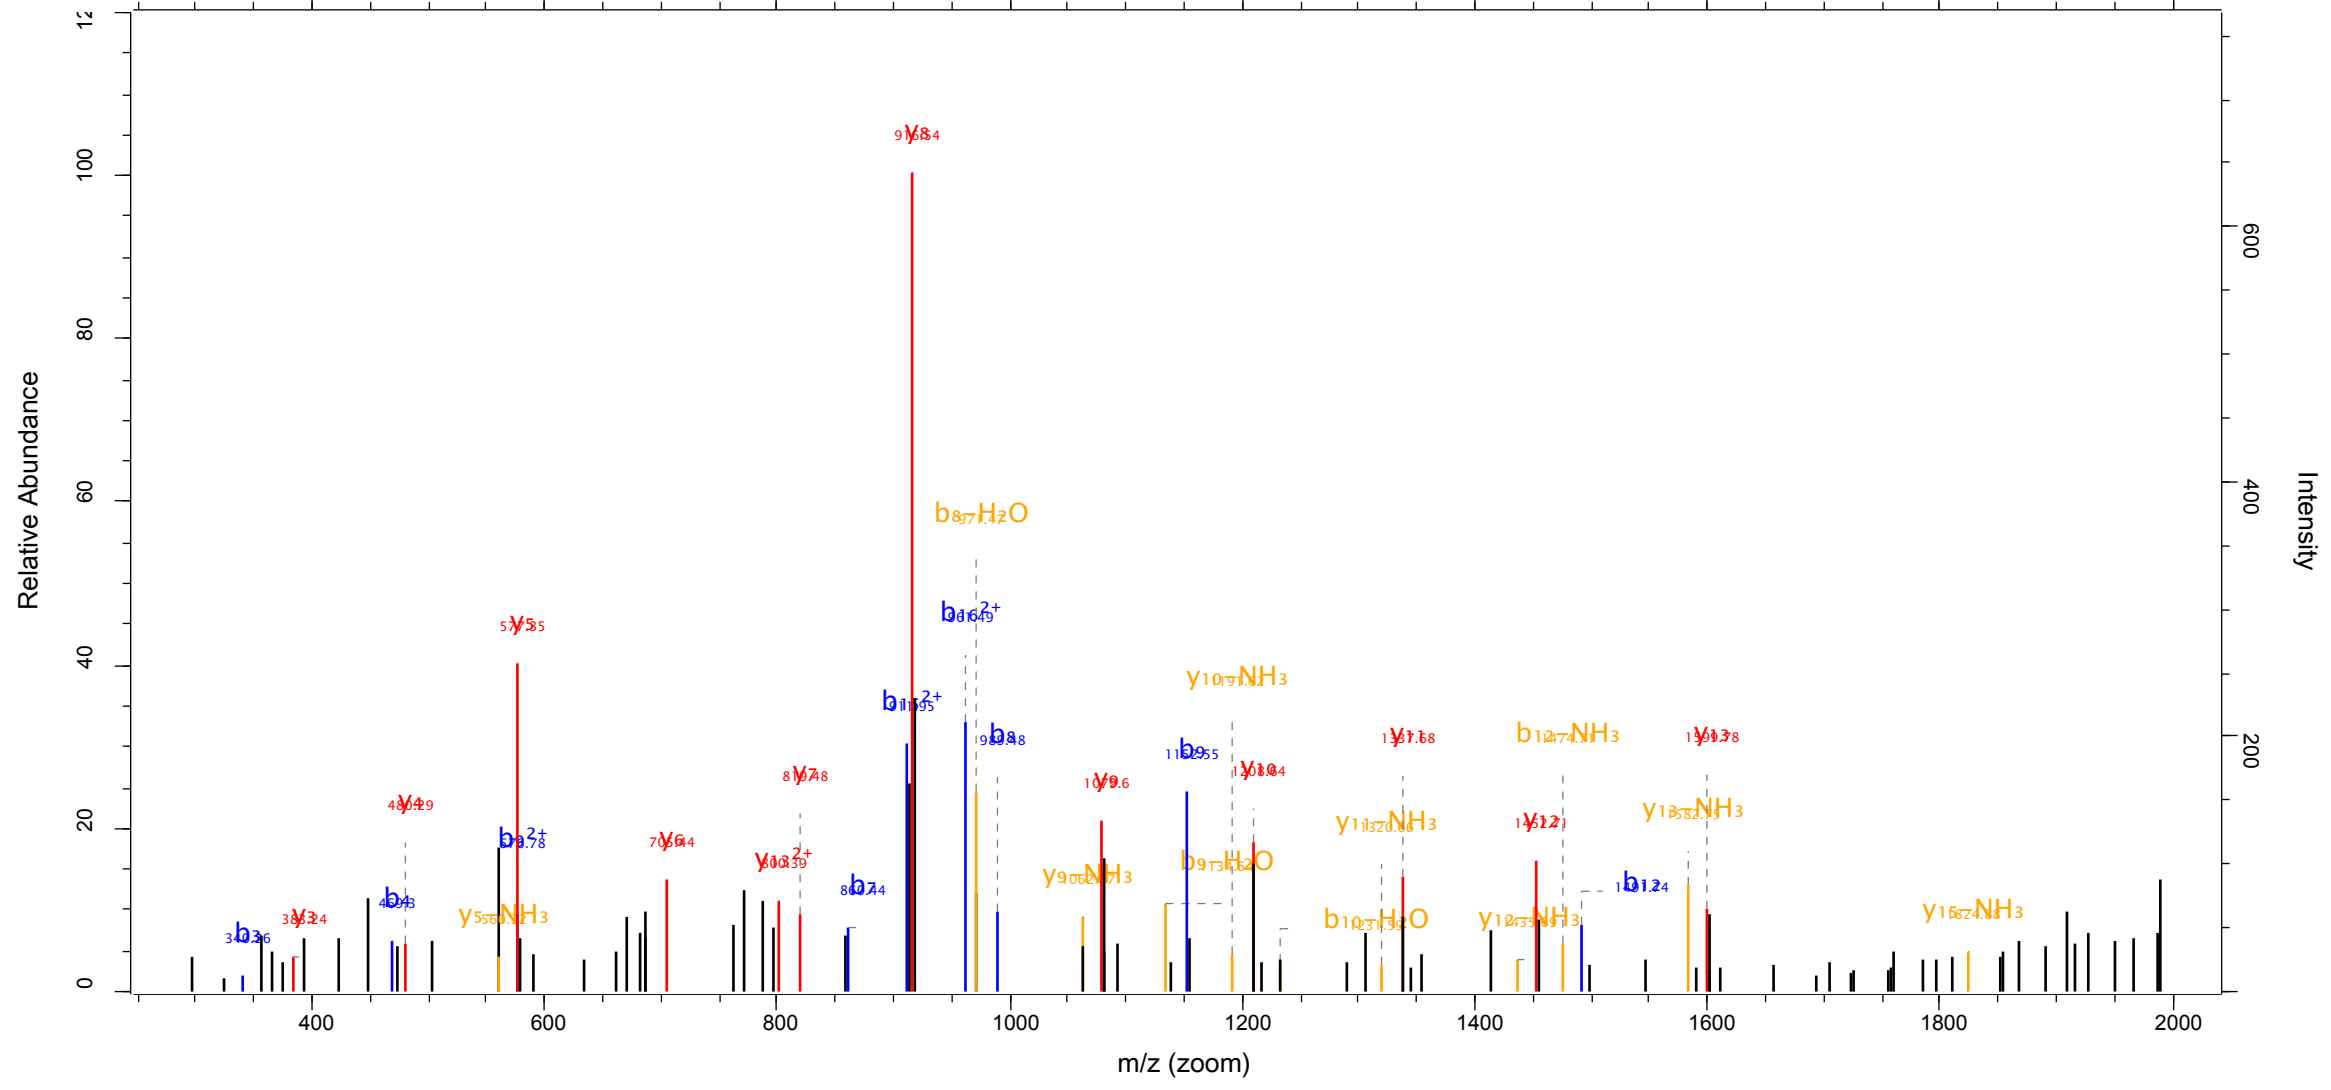



Scan number  
Method

14968  
ITMS; CID

Raw file  
Pepti...

nak\_UBX6SAX1L\_14Jan11\_11  
127.83

Protein Group 1111

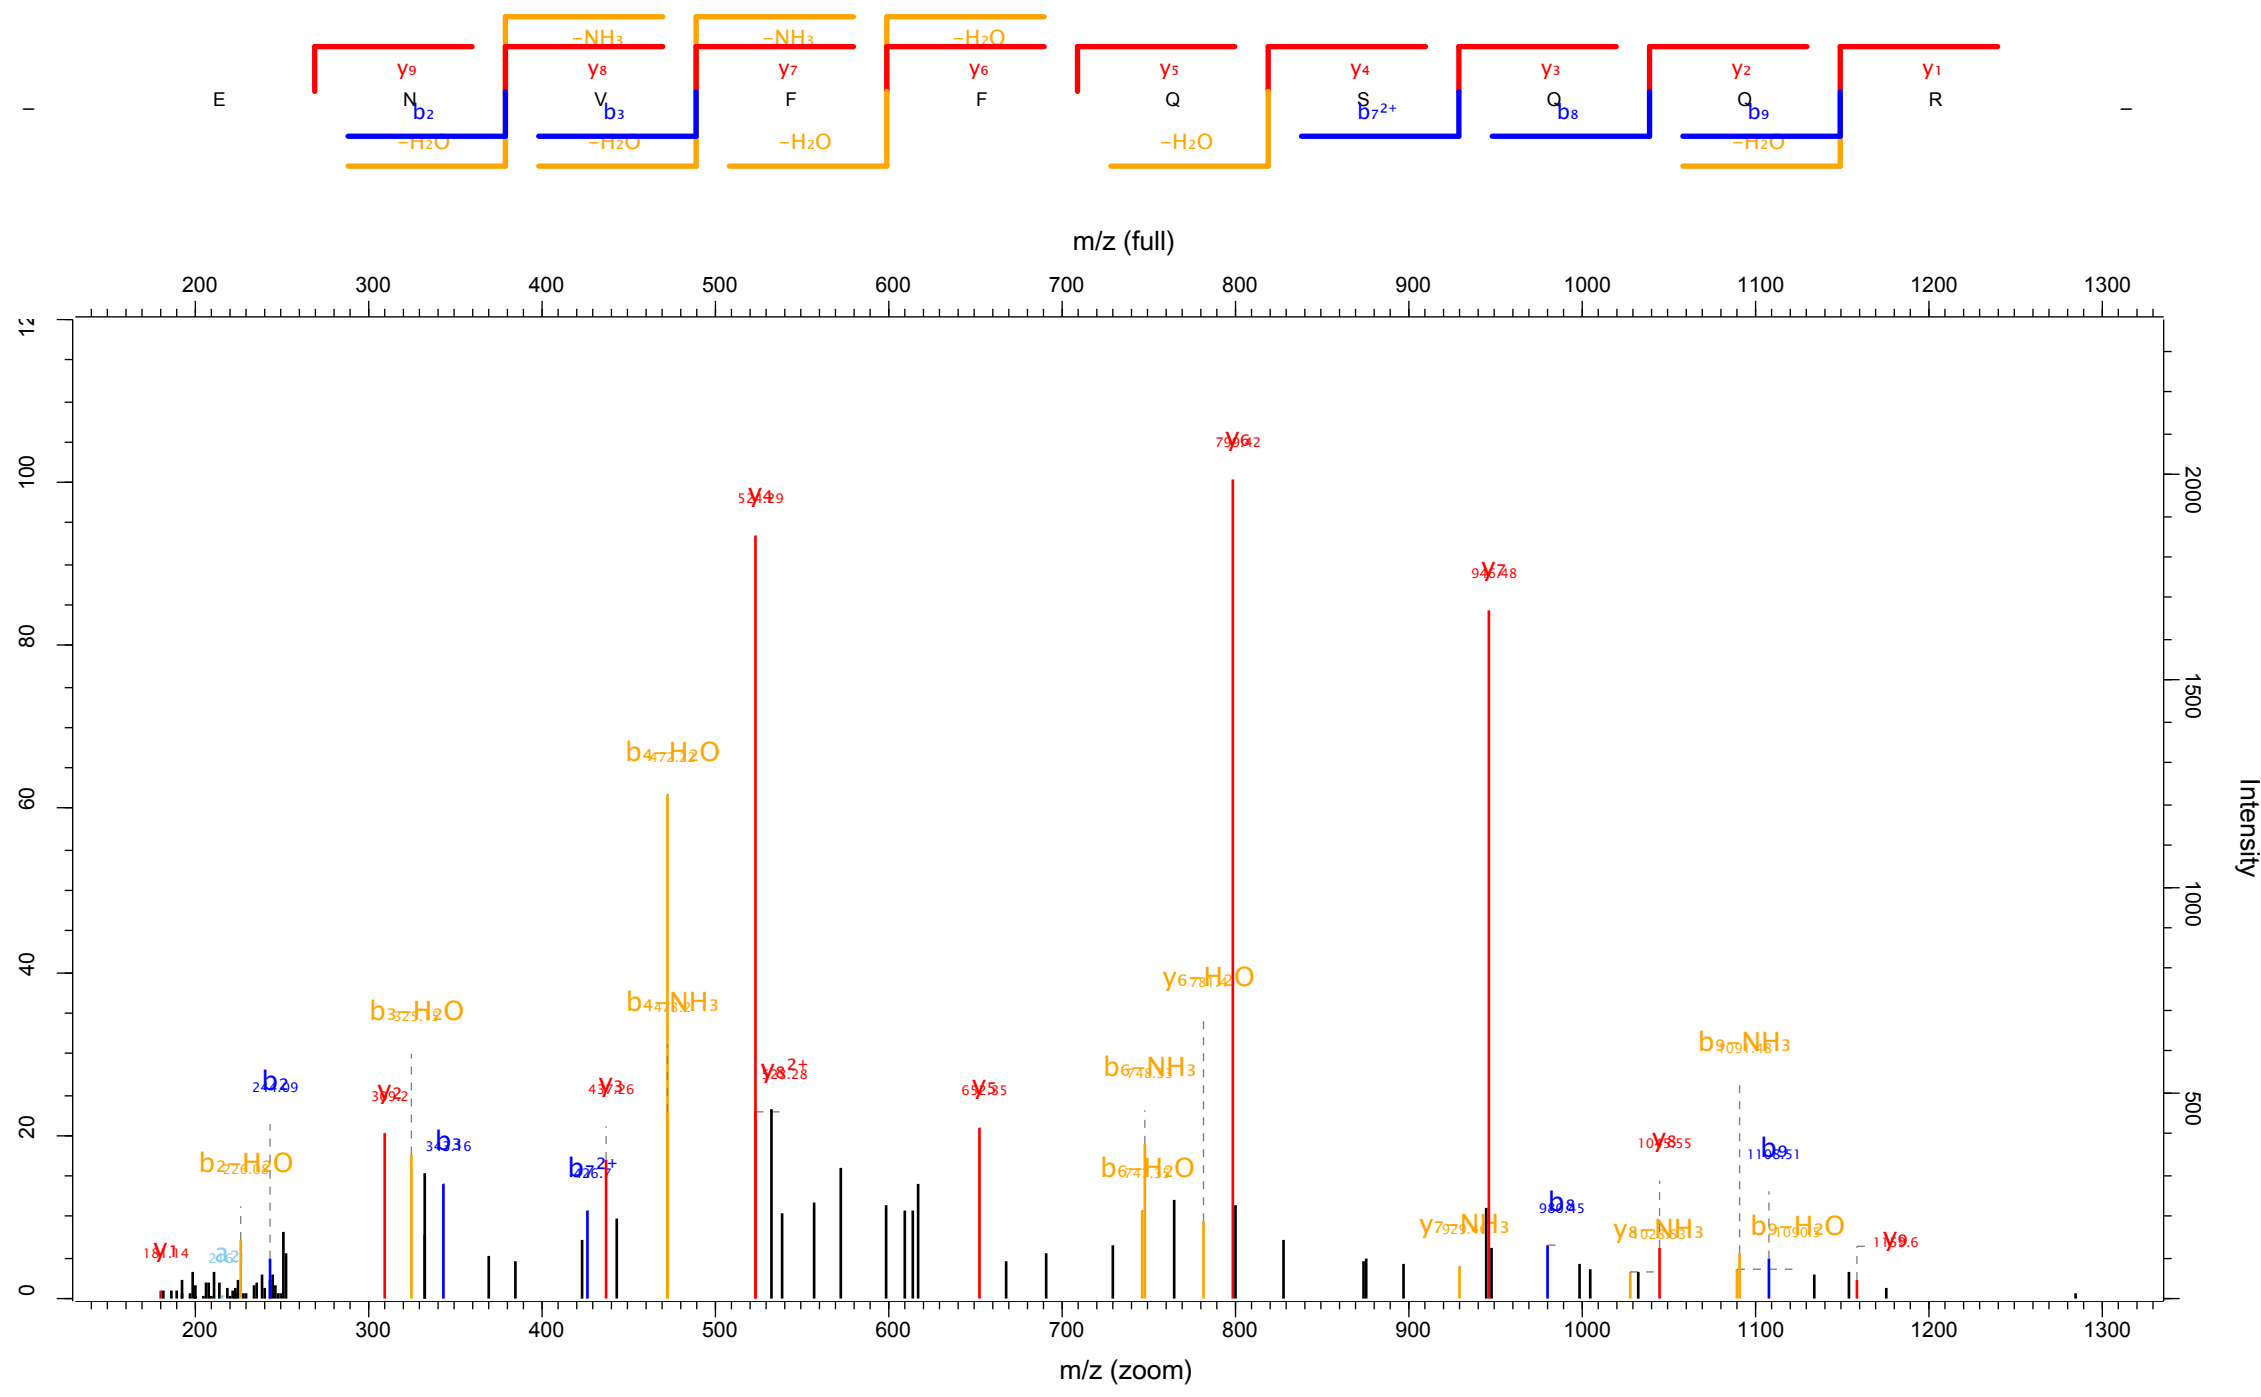

Scan number

30195

Raw file

nak\_cdc48UbconjugatesSAX2\_22may10\_3

Protein Group 1128

Method

ITMS; CID

Pepti...

78.81

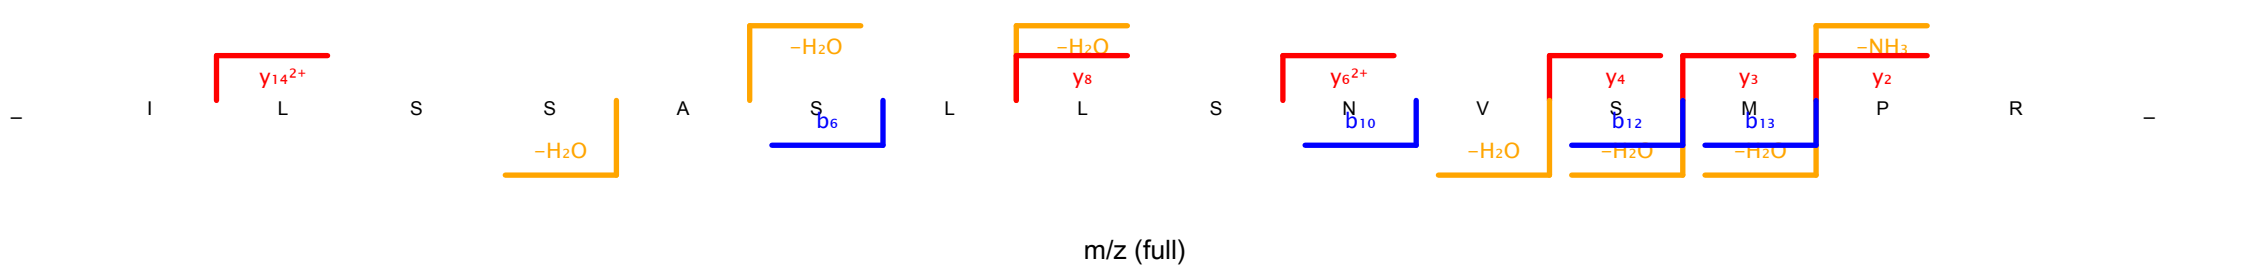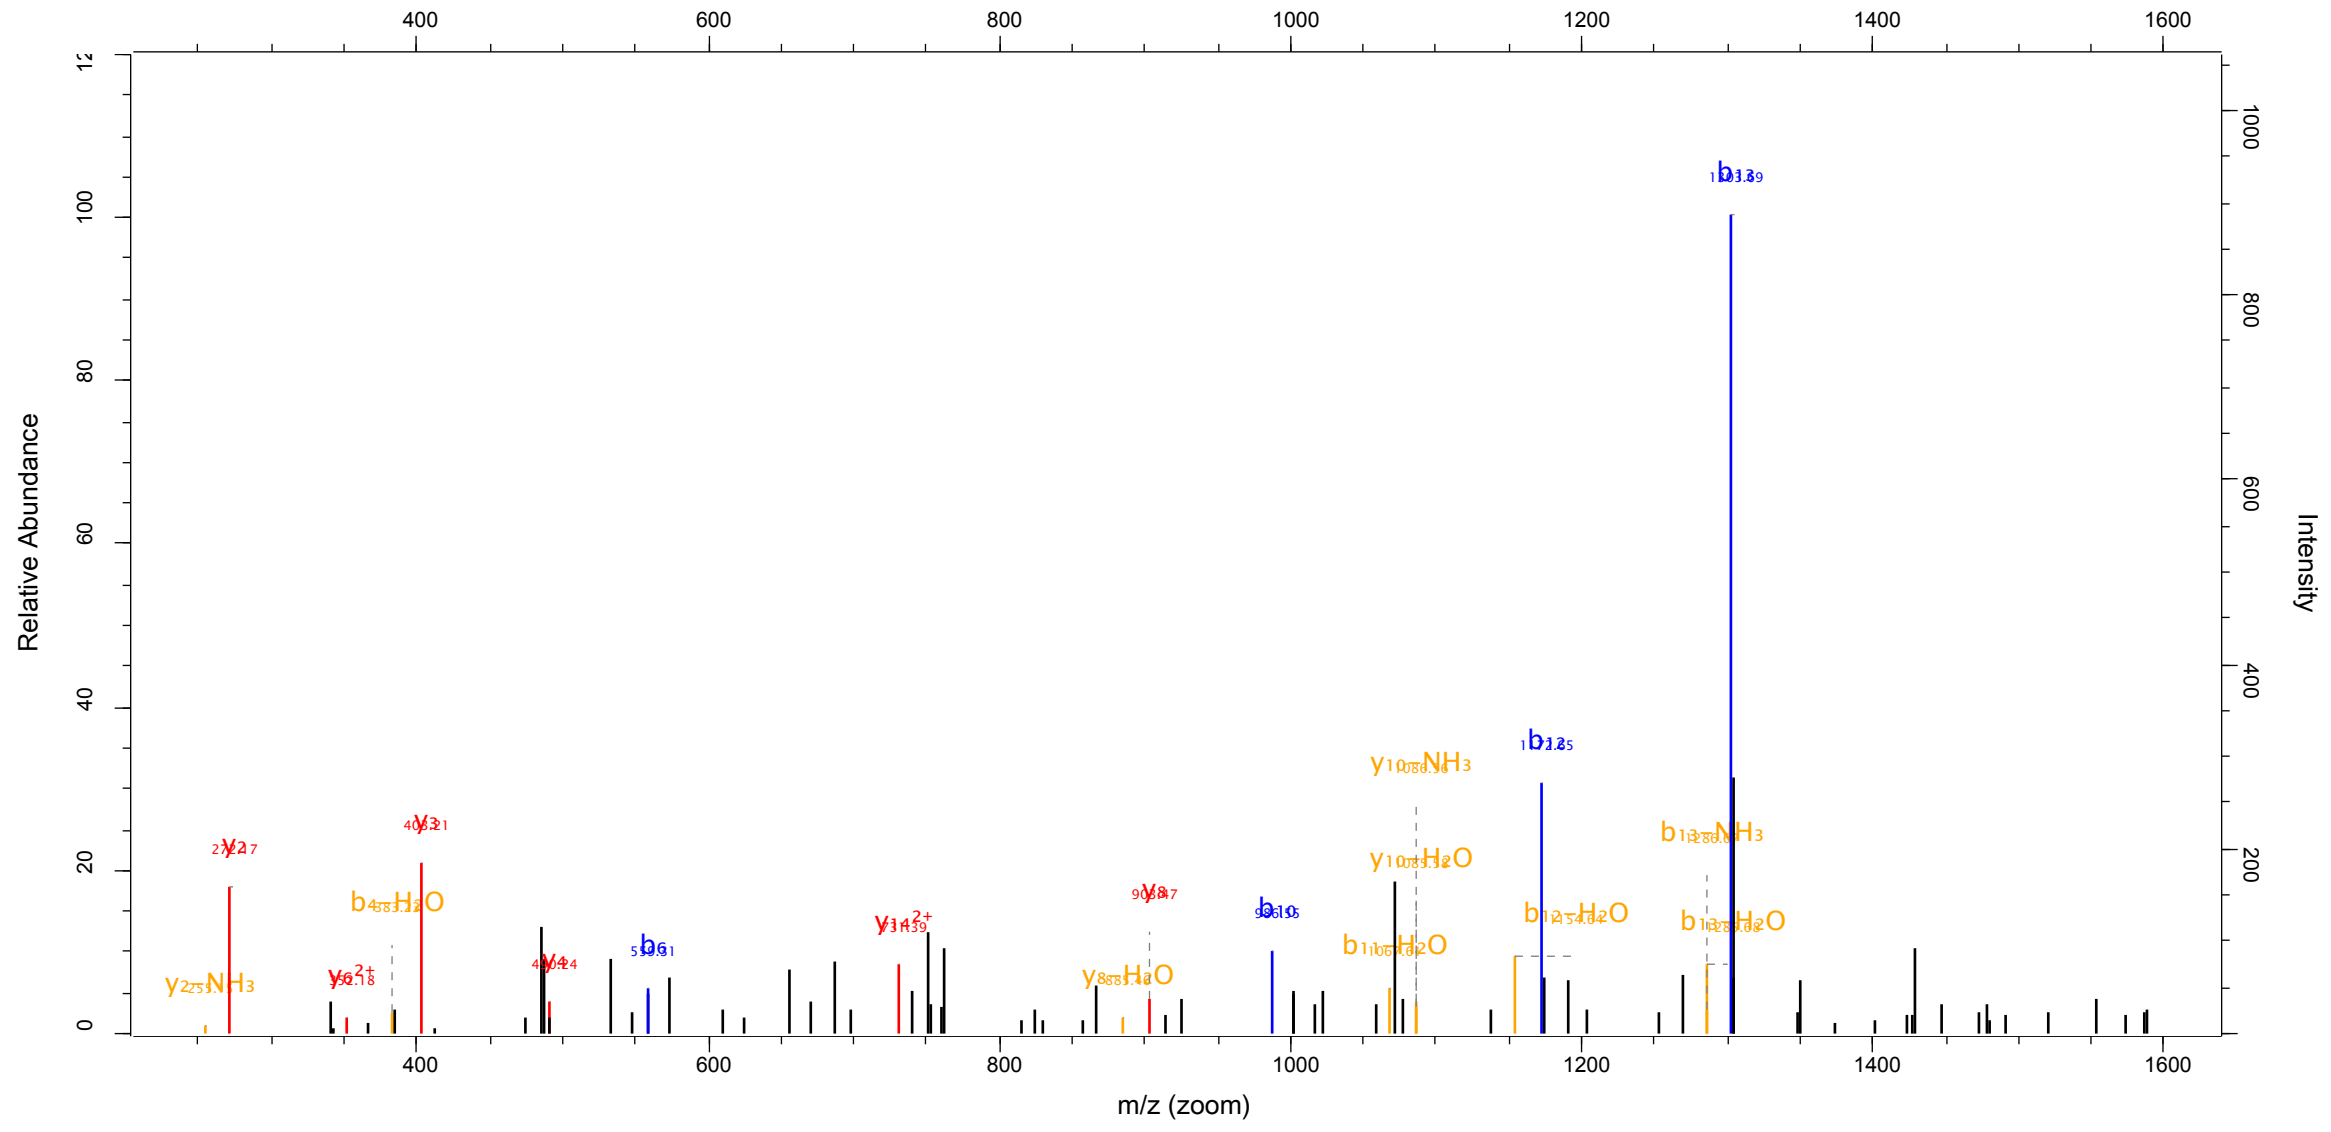

Scan number  
Method

13614  
ITMS; CID

Raw file  
Pepti...

nak\_UBX3LSAX6\_28jan11\_24  
199.37

Protein Group 1168

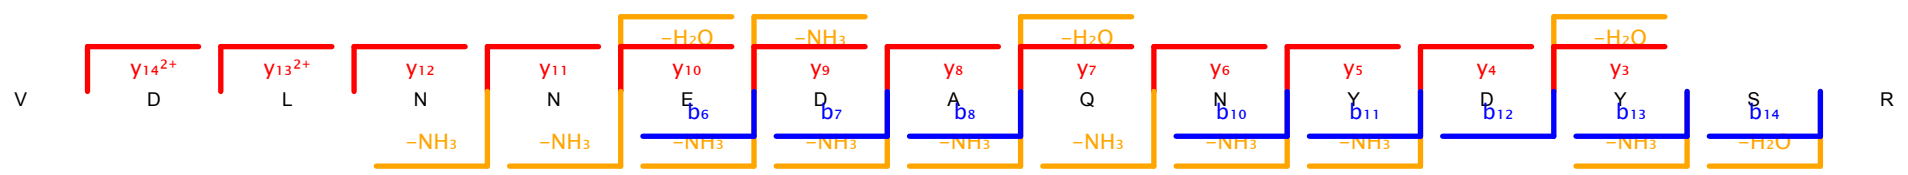

m/z (full)

400 600 800 1000 1200 1400 1600 1800

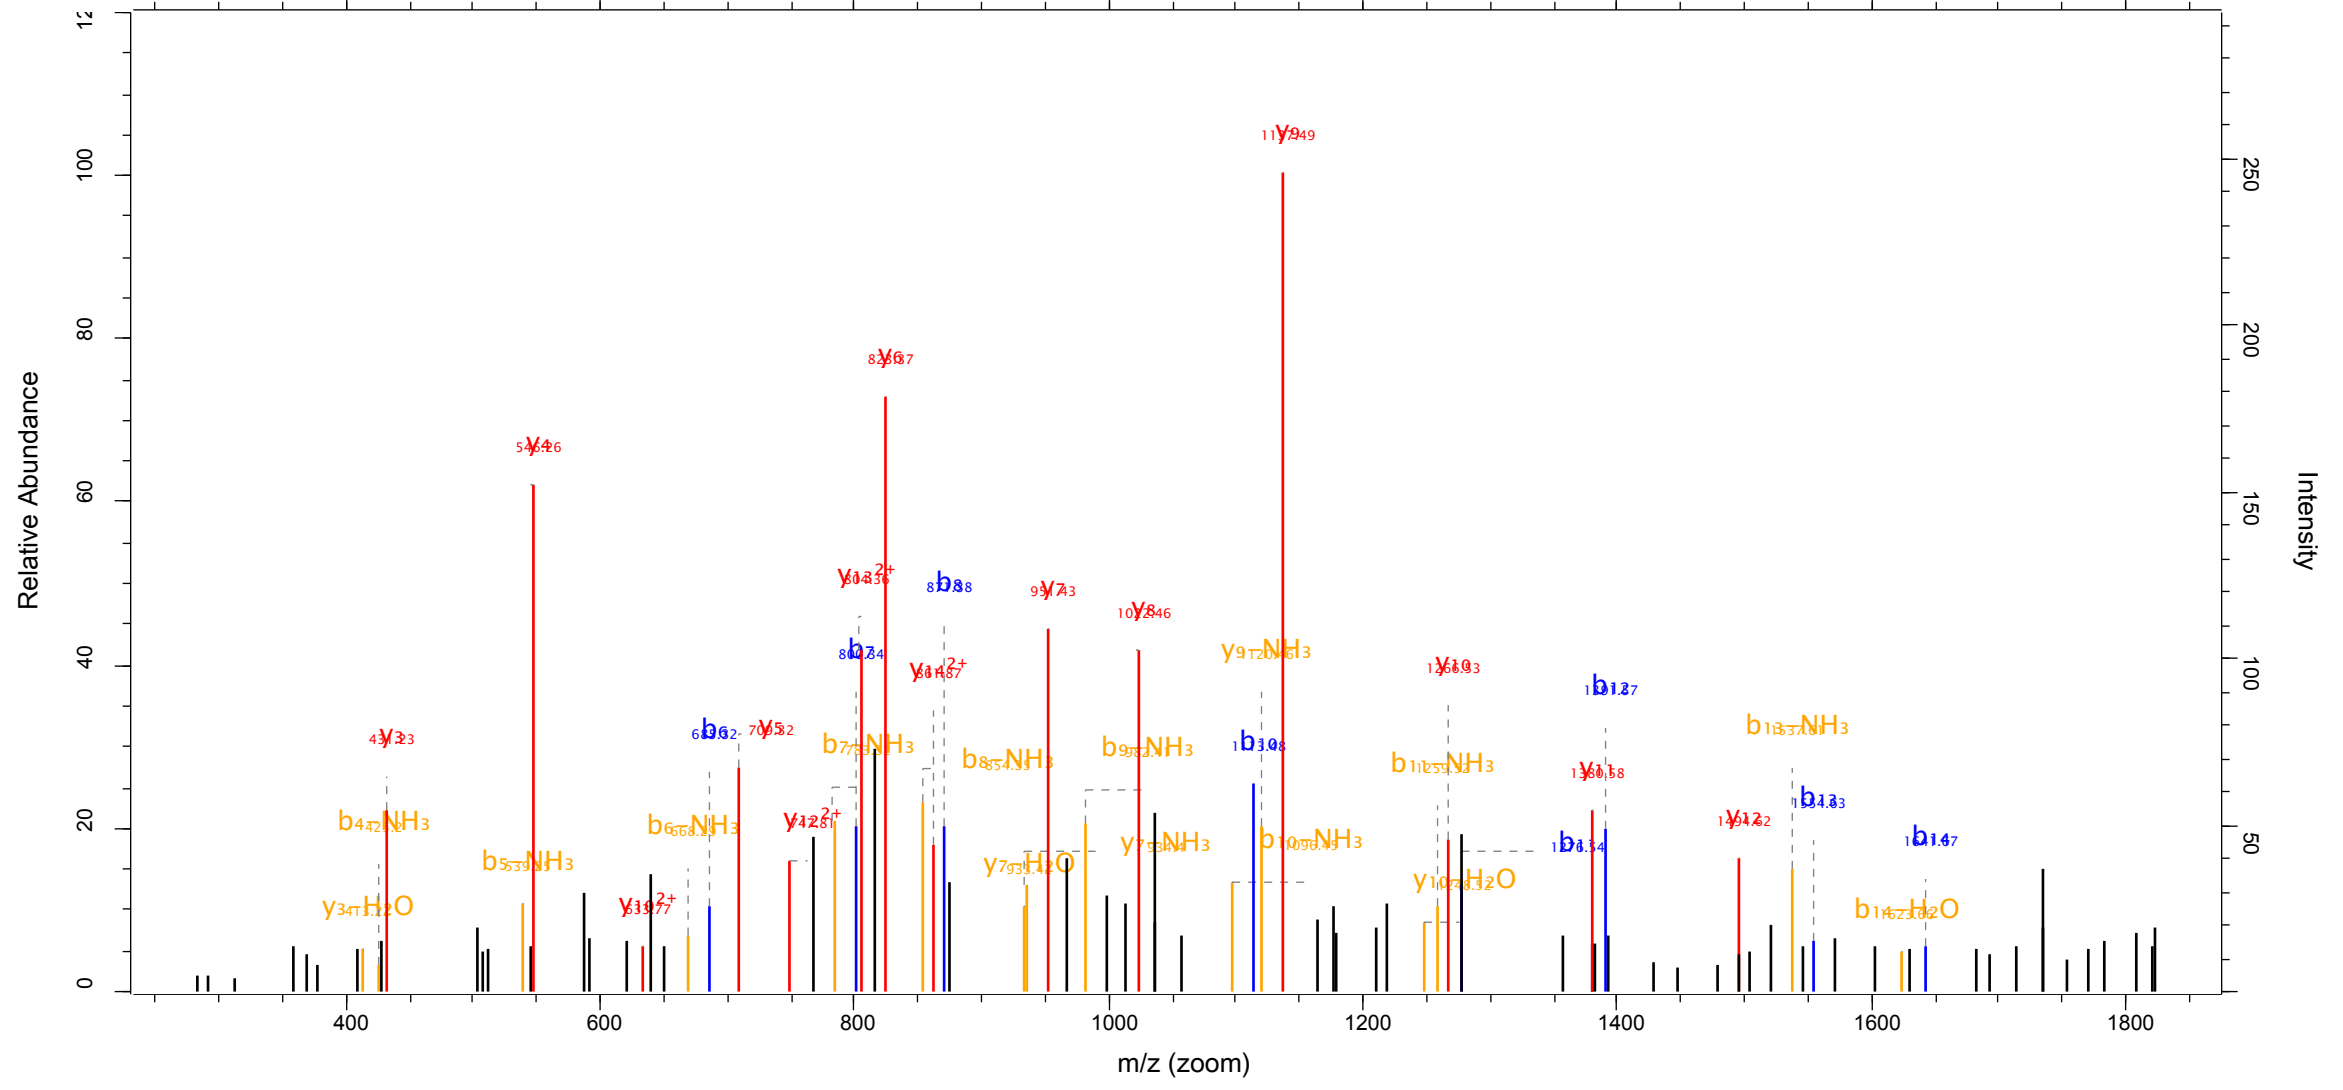

Scan number  
Method

21304  
ITMS; CID

Raw file  
Pepti...

nak\_UBX6SAX6L\_14jan11\_16  
126.19

Protein Group 1210

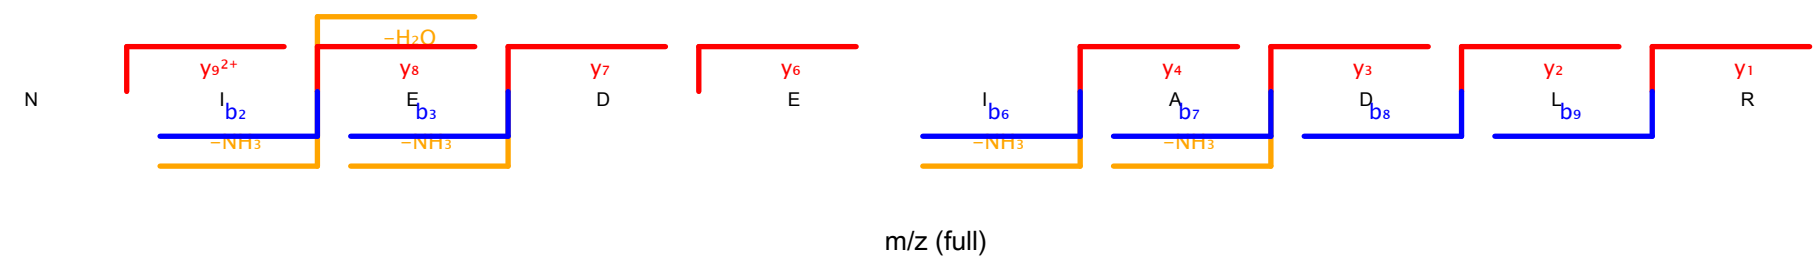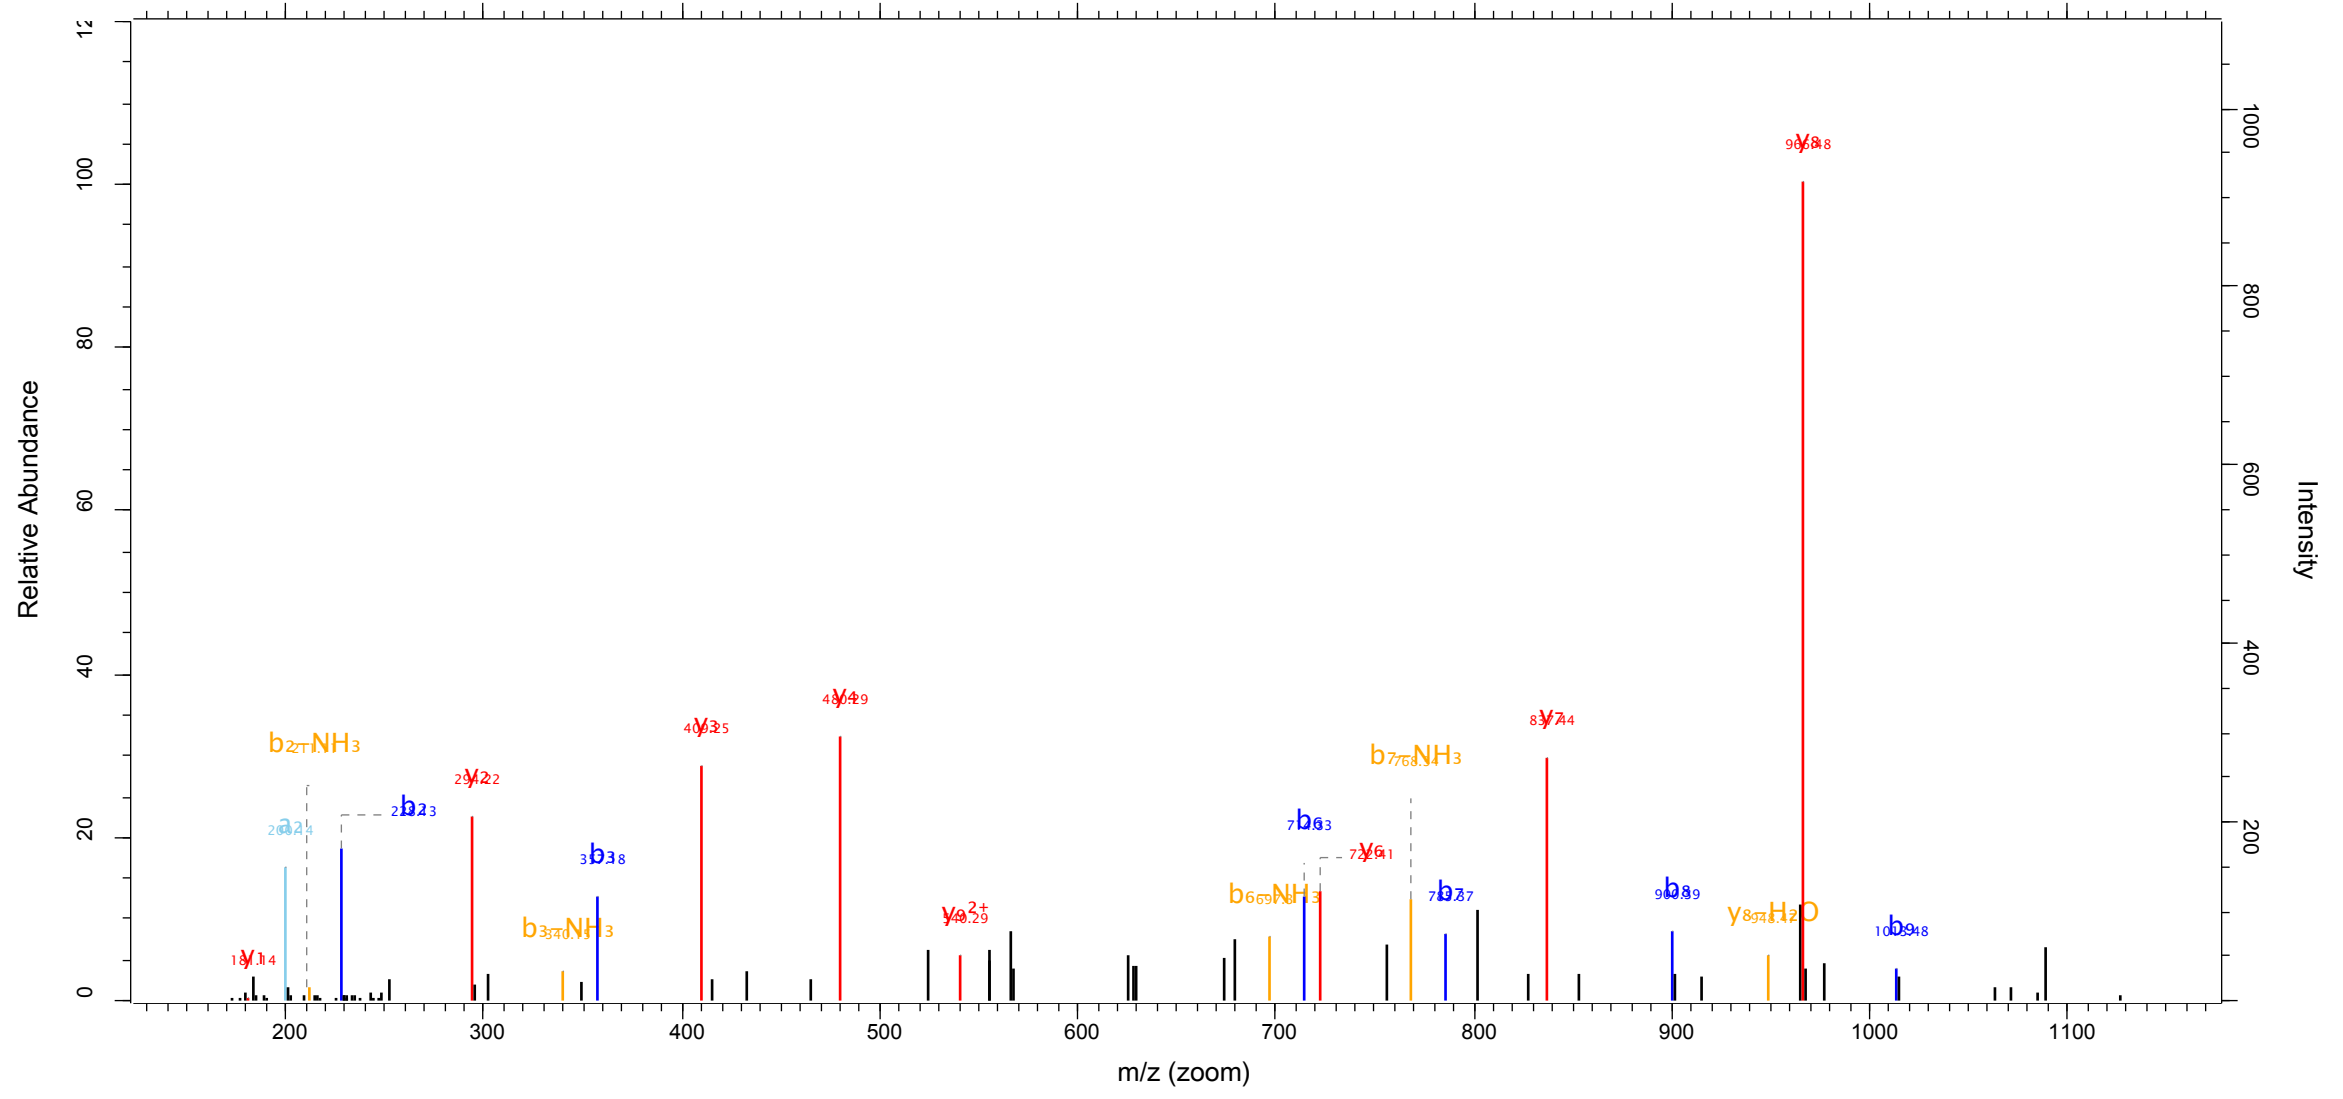

Scan number 11193 Raw file nak\_ubx4LightSAX3\_11 nov03  
 Method ITMS; CID Pepti... 196.88

Protein Group 1286

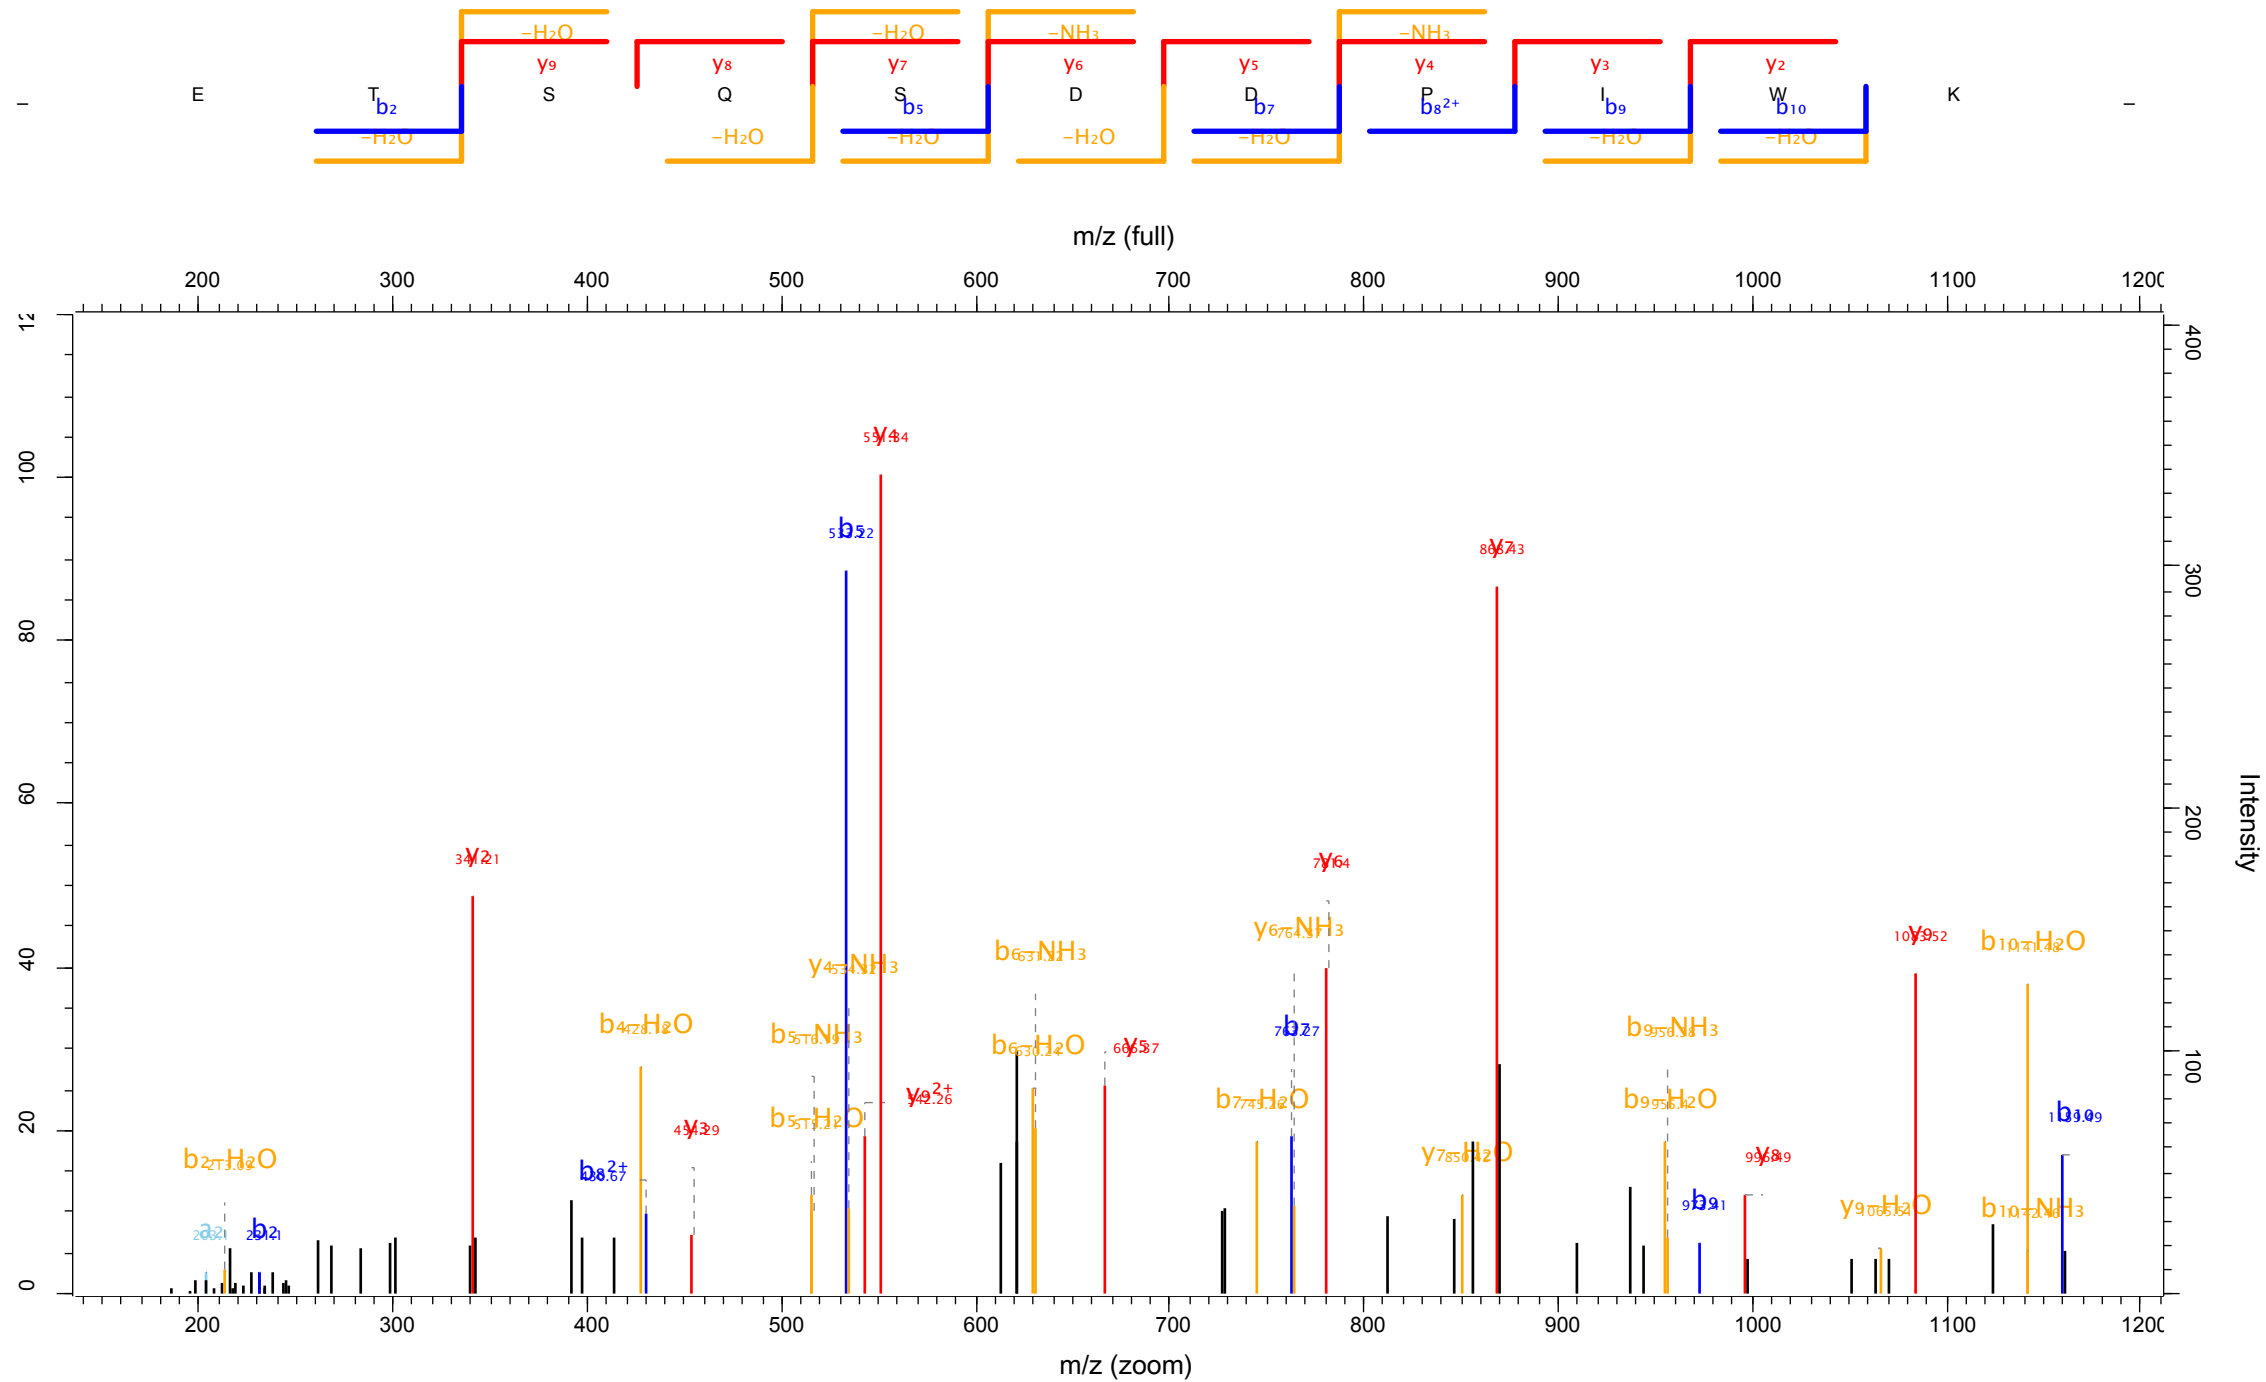

Scan number  
Method

14808  
ITMS; CID

Raw file  
Pepti...

nak\_UBX3HSAX5\_28jan11\_31  
107.21

Protein Group 1361

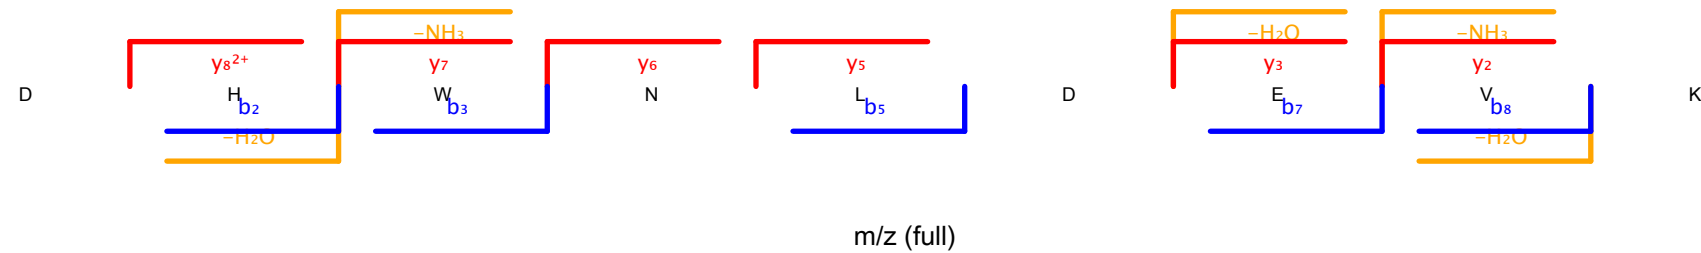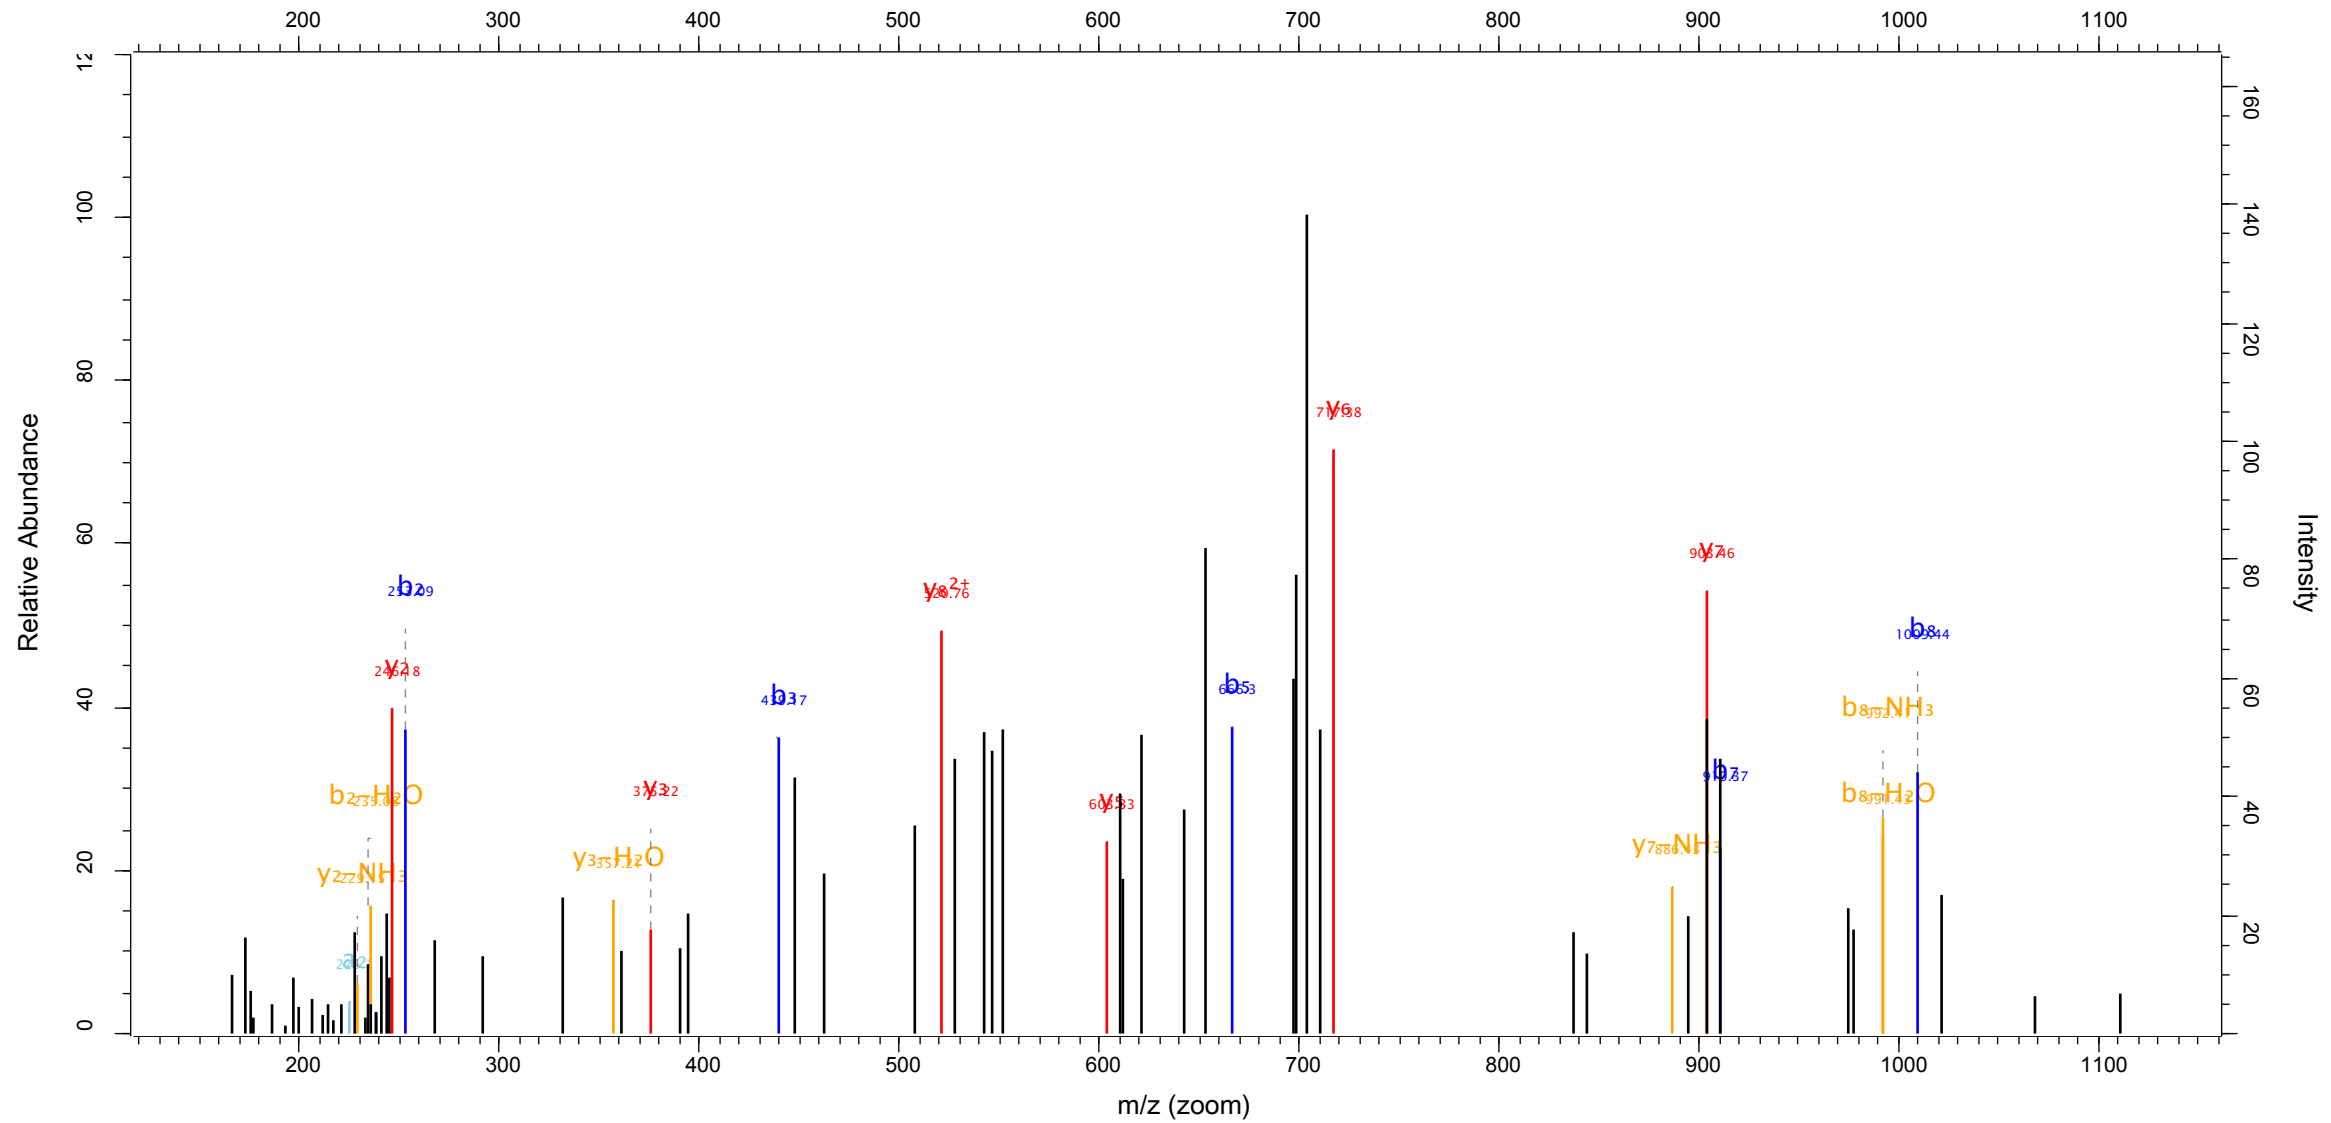

Scan number 38218  
Method ITMS; CID

Raw file nak\_UBX2HSAX3\_8feb11\_07  
Pepti... 200.6

Protein Group 1375

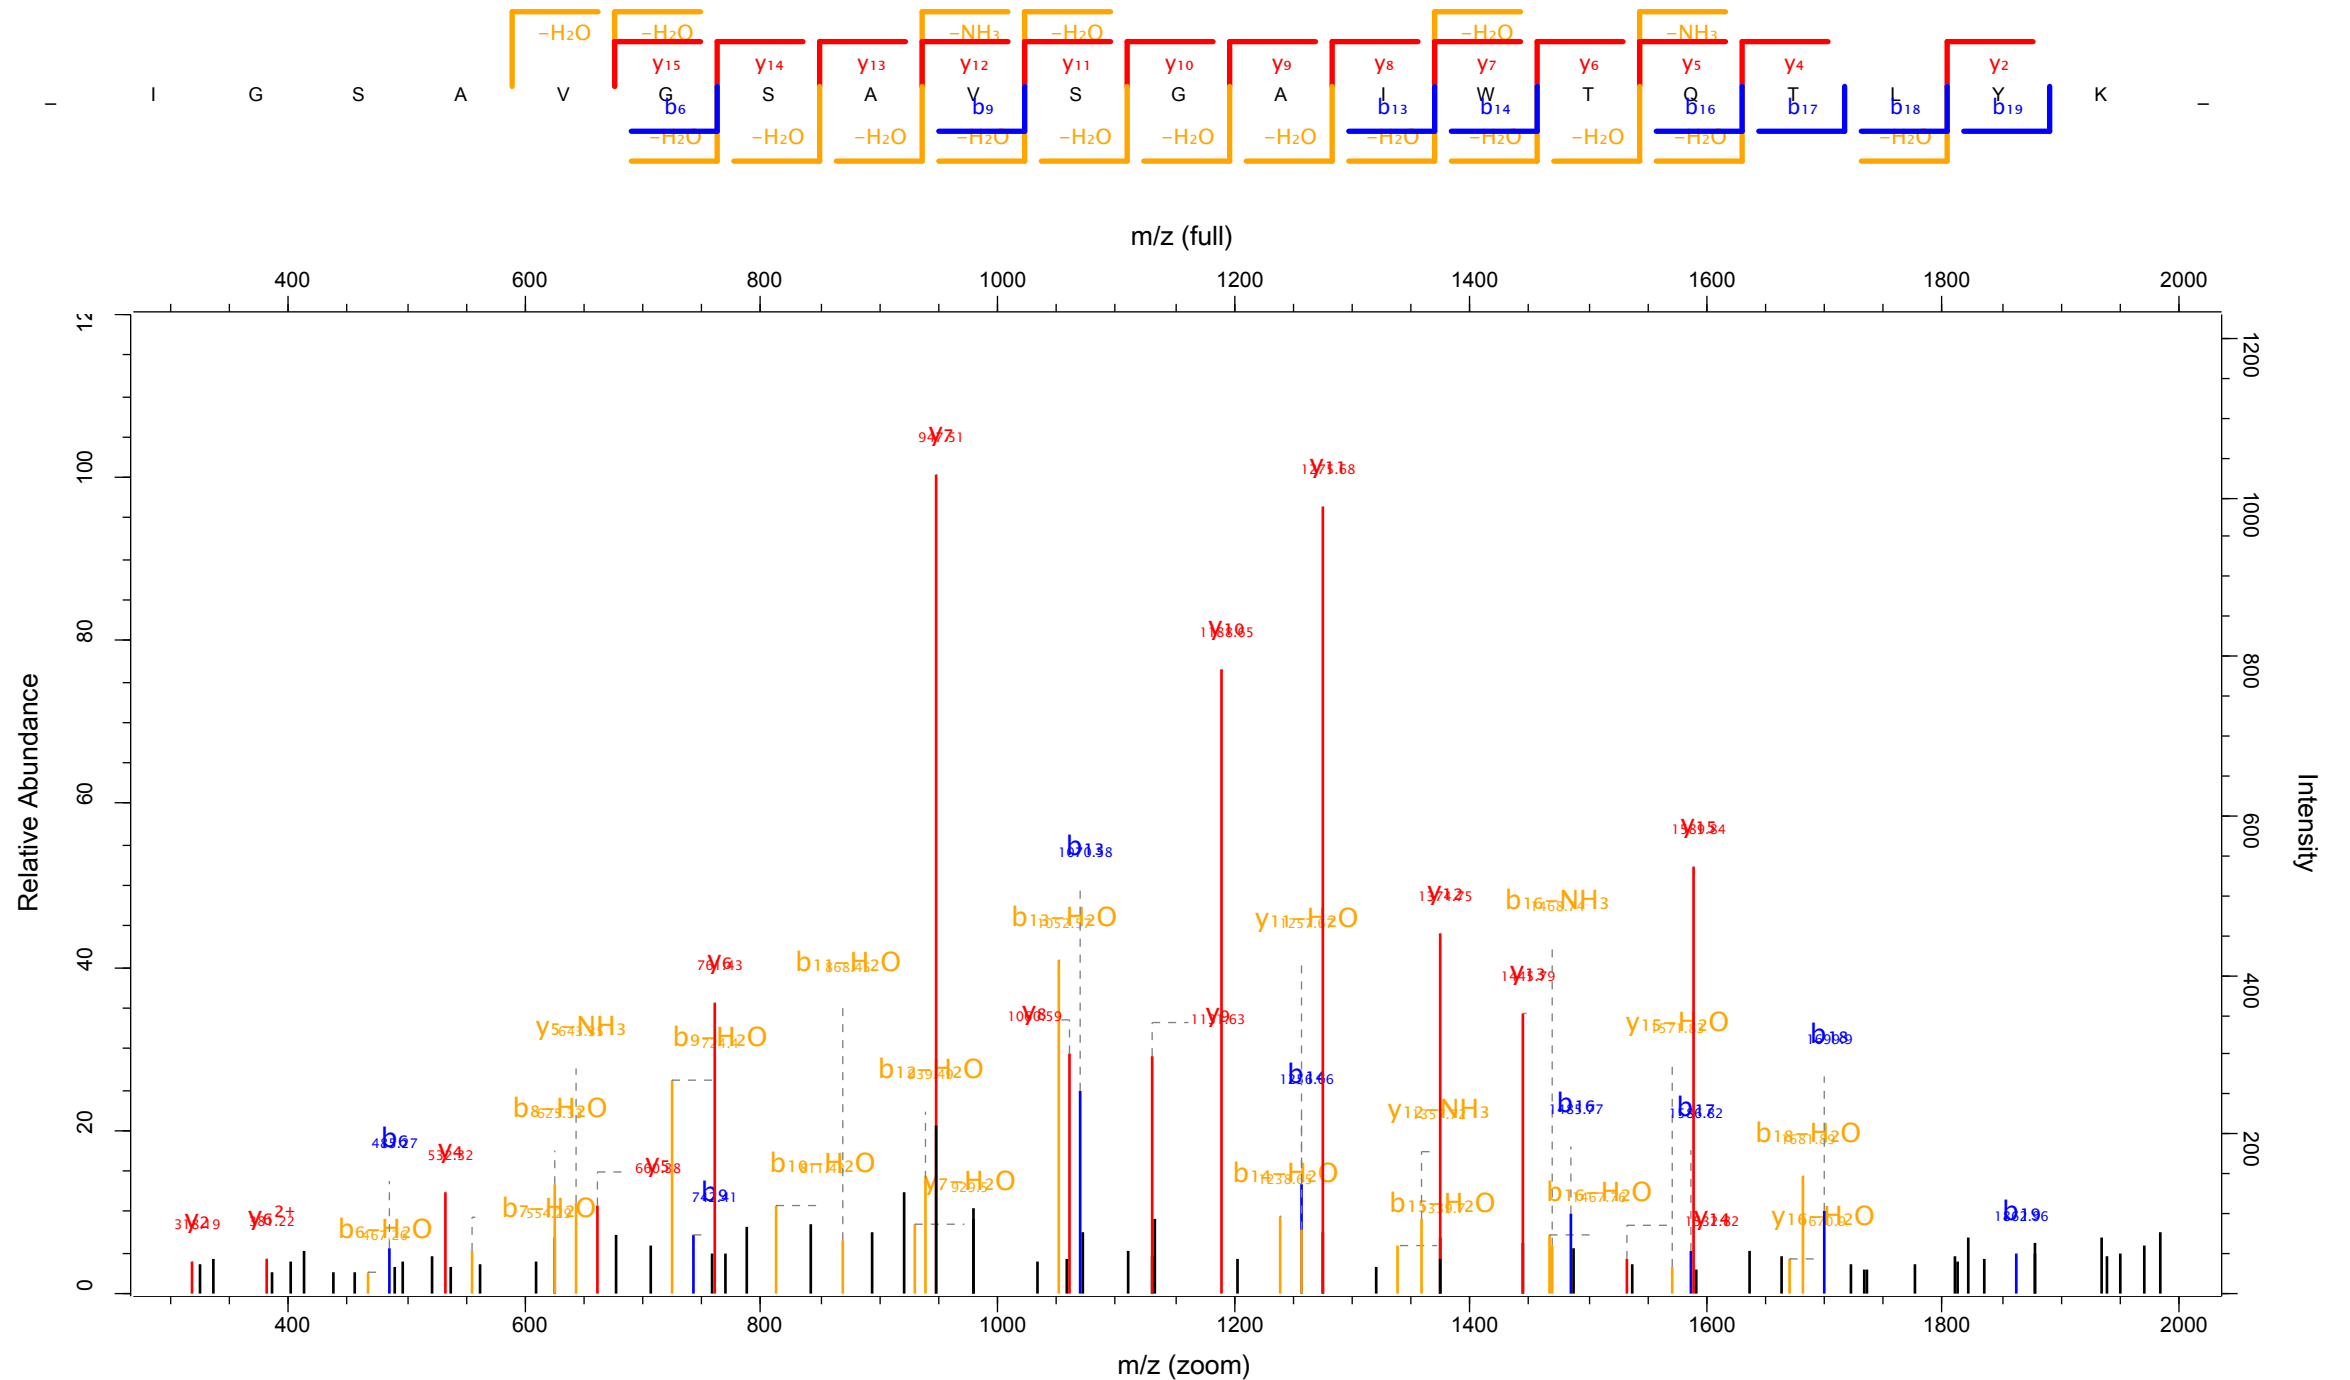

Scan number 28933 Raw file nak\_cdc48UbconjugatesSAX5\_21may16  
 Method ITMS; CID Pepti... 125.45

Protein Group 1420

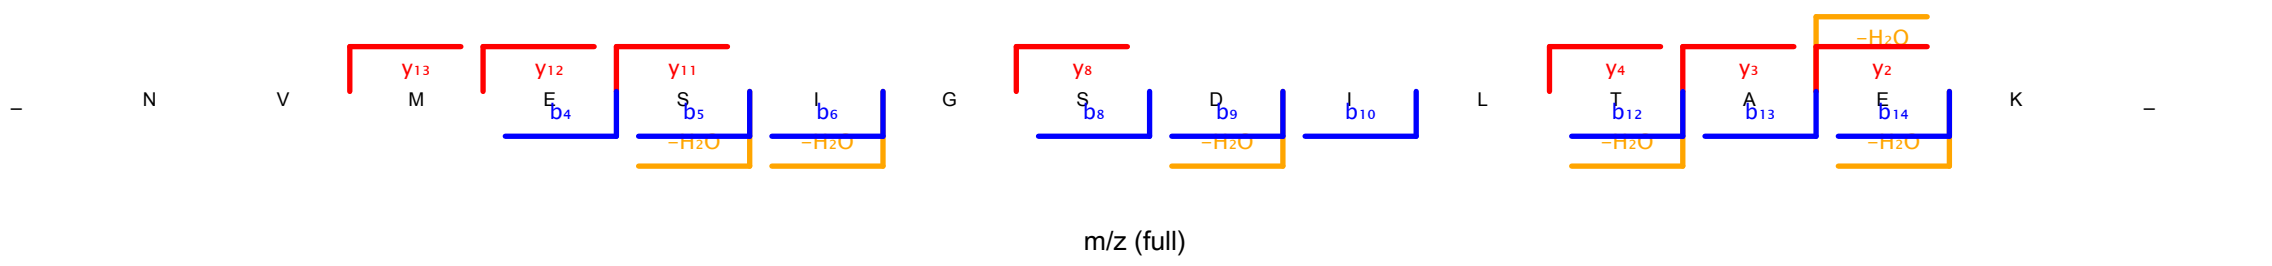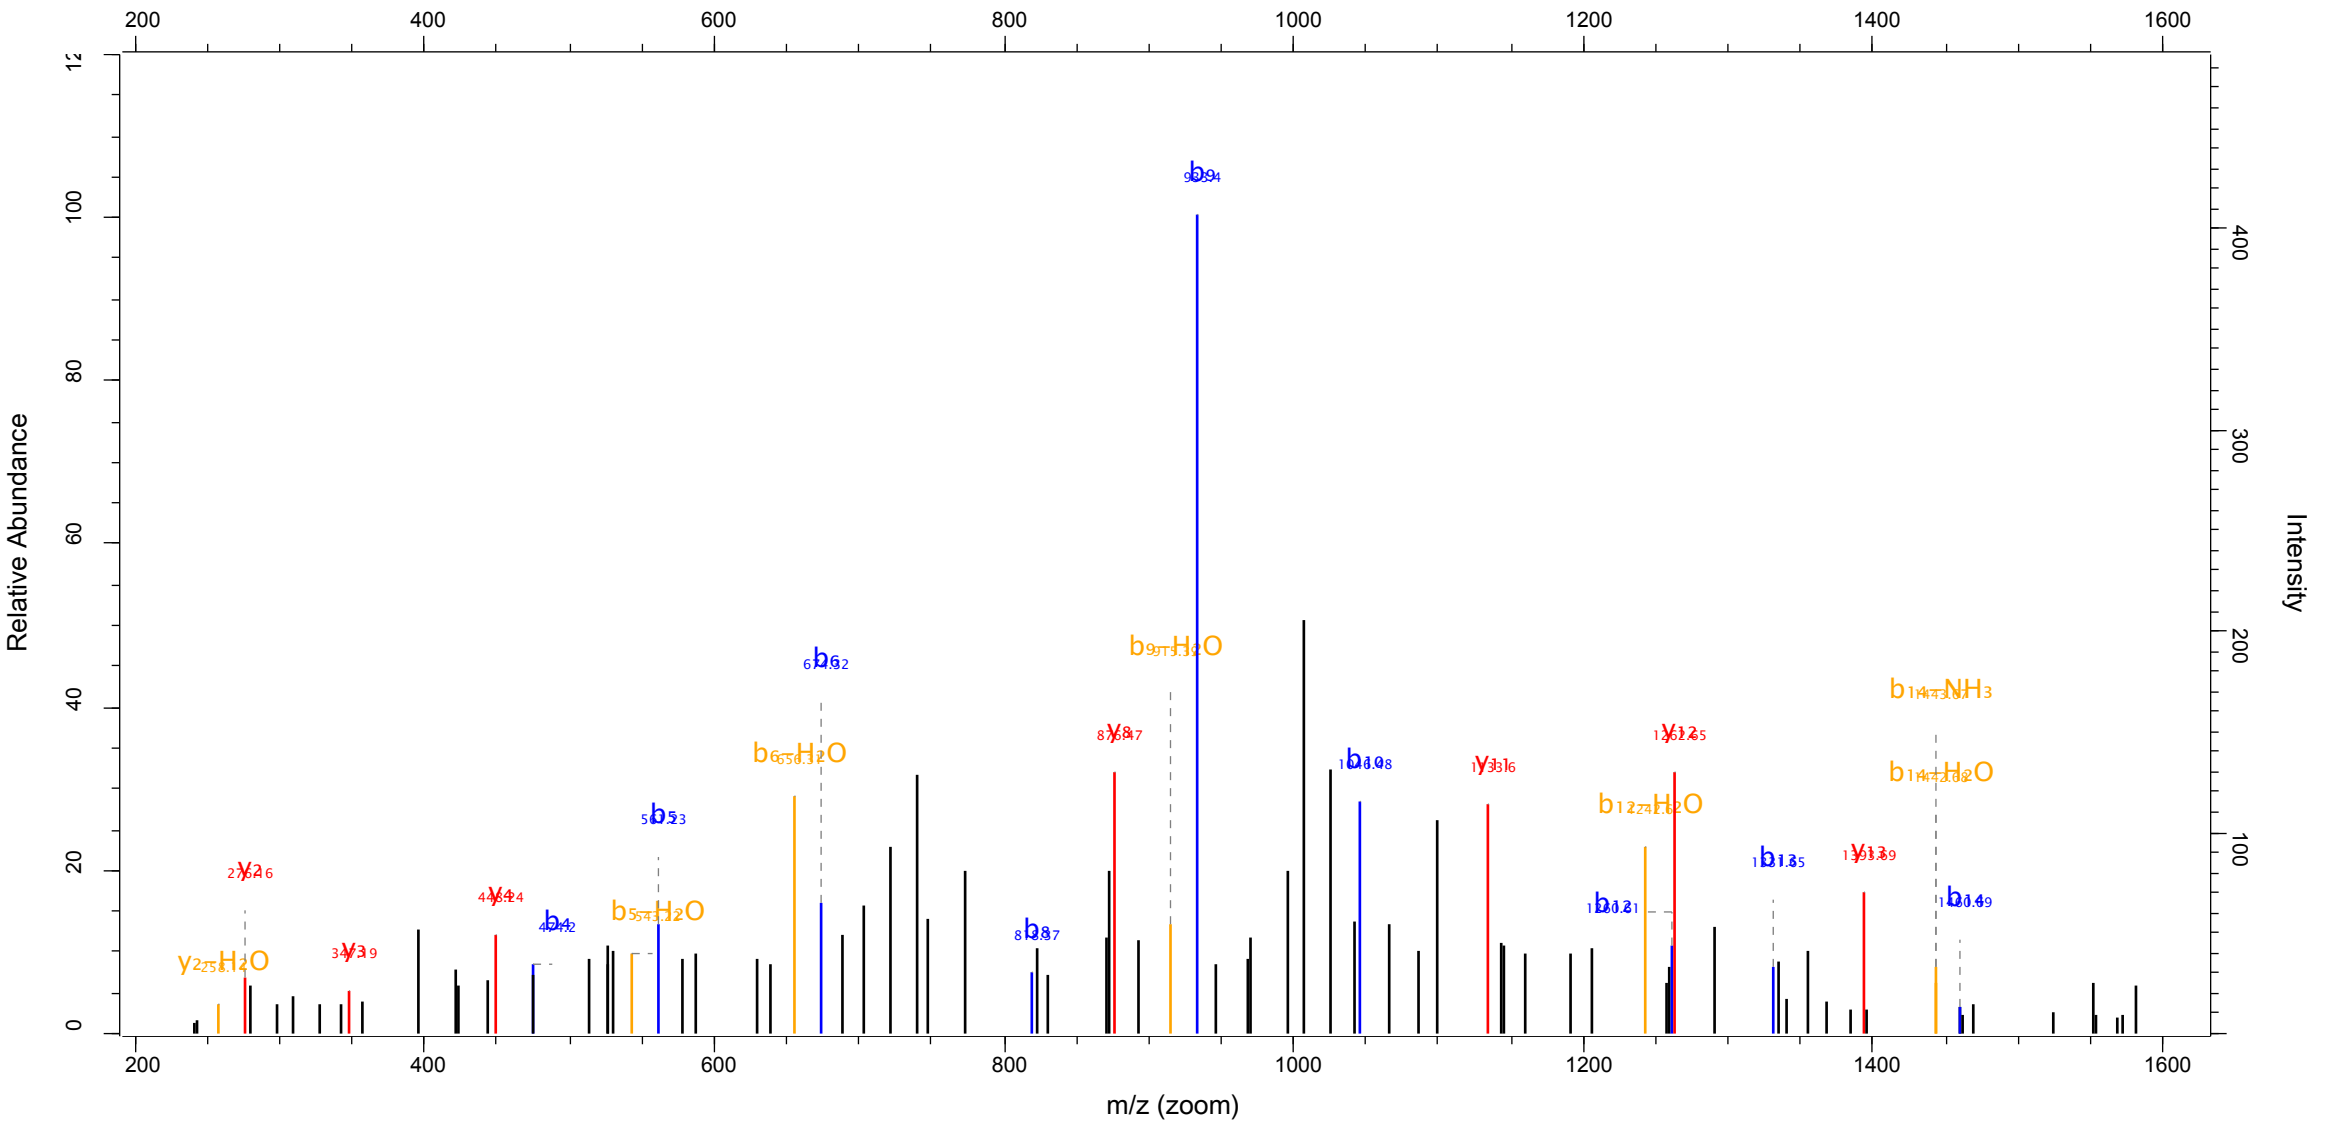



Scan number

30296

Raw file

nak\_cdc48UbconjugatesSAX2\_14may10\_06

Protein Group 1434

Method

ITMS; CID

Pepti...

181.98

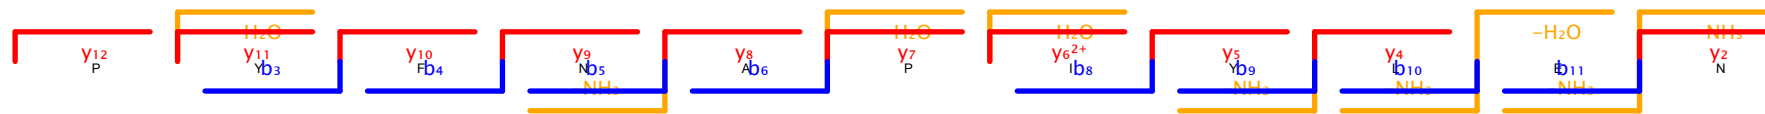

m/z (full)

200 300 400 500 600 700 800 900 1000 1100 1200 1300 1400 1500 1600

Relative Abundance

100

50

0

Intensity

1000

500

m/z (zoom)

200 300 400 500 600 700 800 900 1000 1100 1200 1300 1400 1500 1600

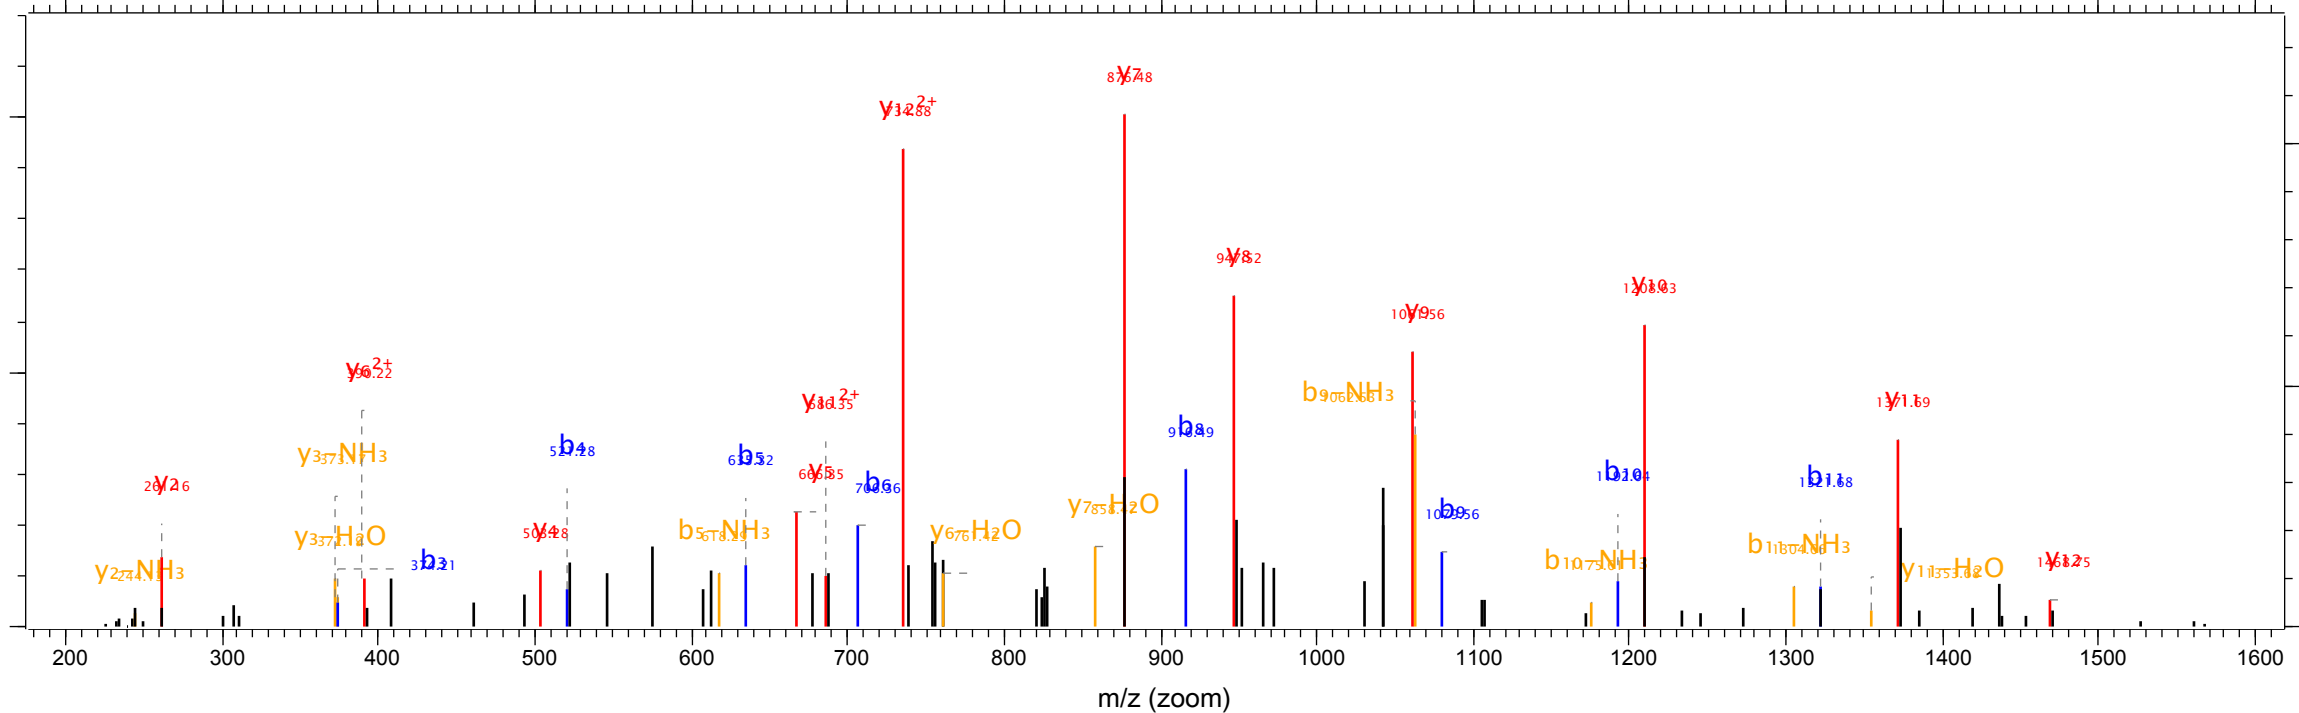

Scan number 34498 Raw file nak\_cdc48UbconjugatesSAX6\_14may10\_10  
 Method ITMS; CID Pepti... 86.29

Protein Group 1502

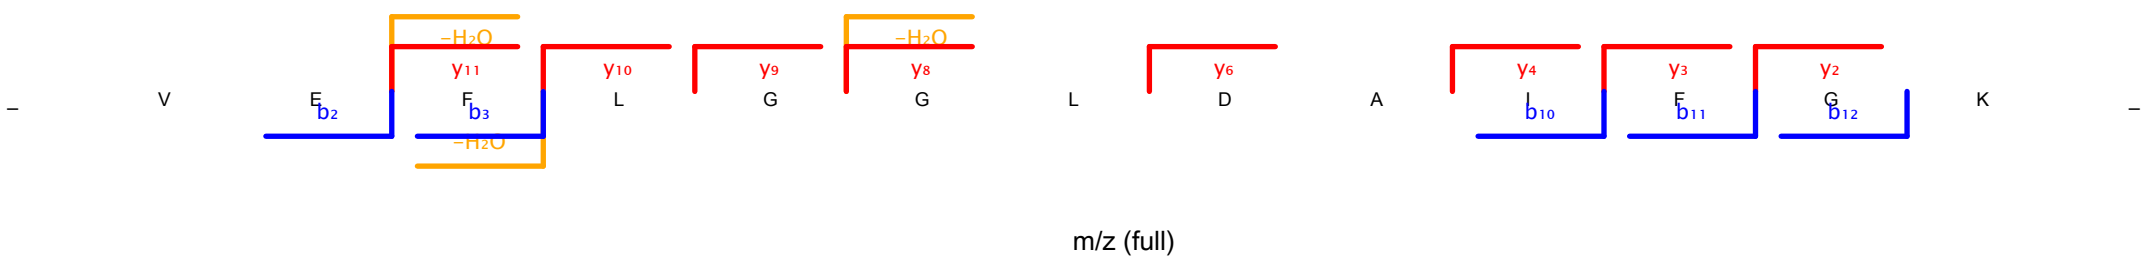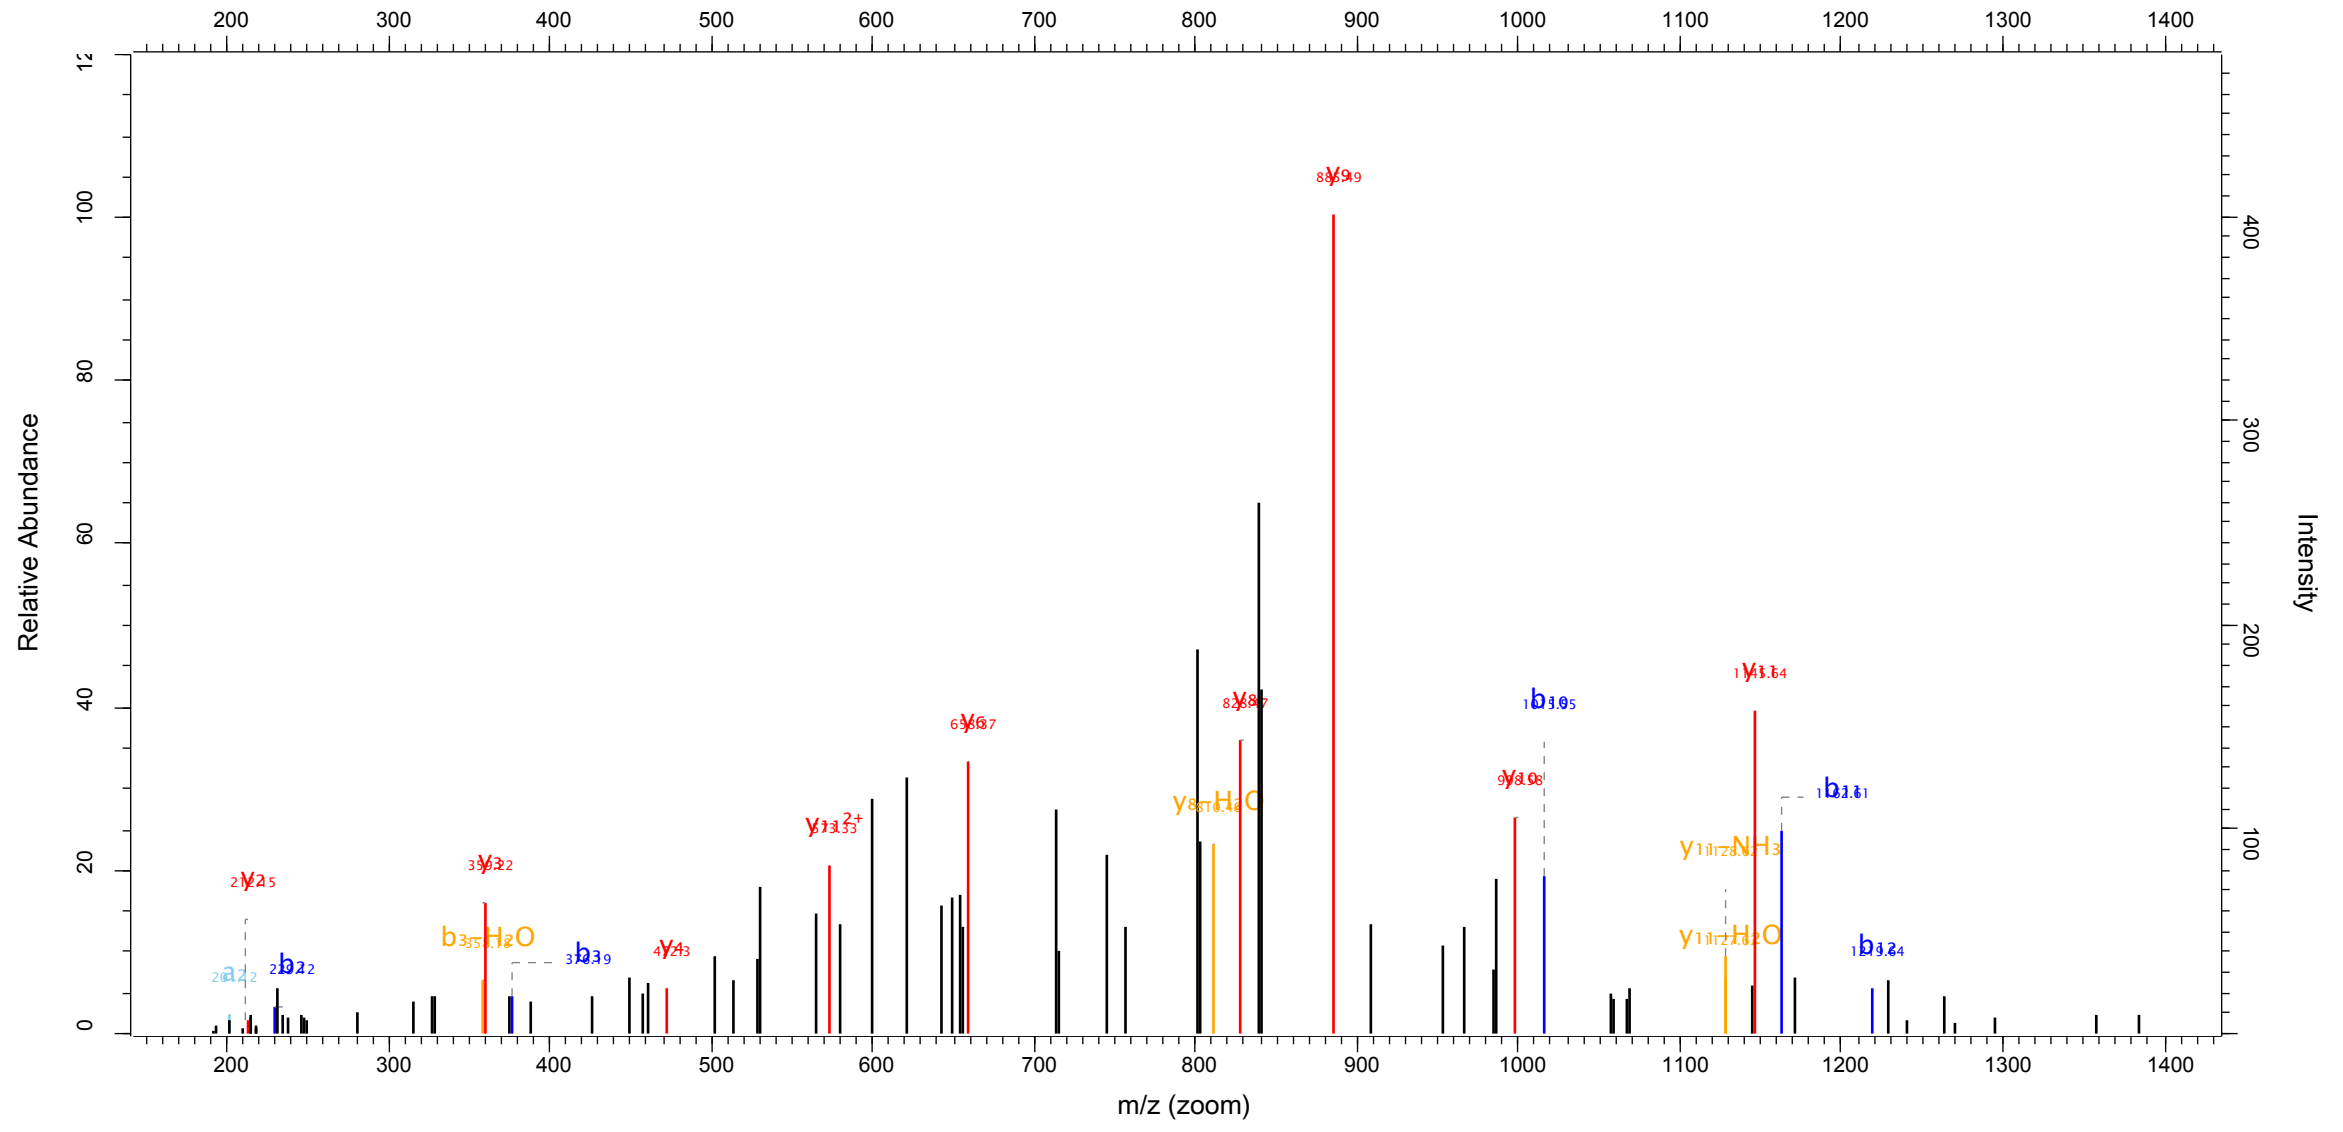

Scan number 32726 Raw file nak\_ubx5H\_SAX1\_17Sep1  
 Method ITMS; CID Pepti... 85.86

**Protein Group 1530**

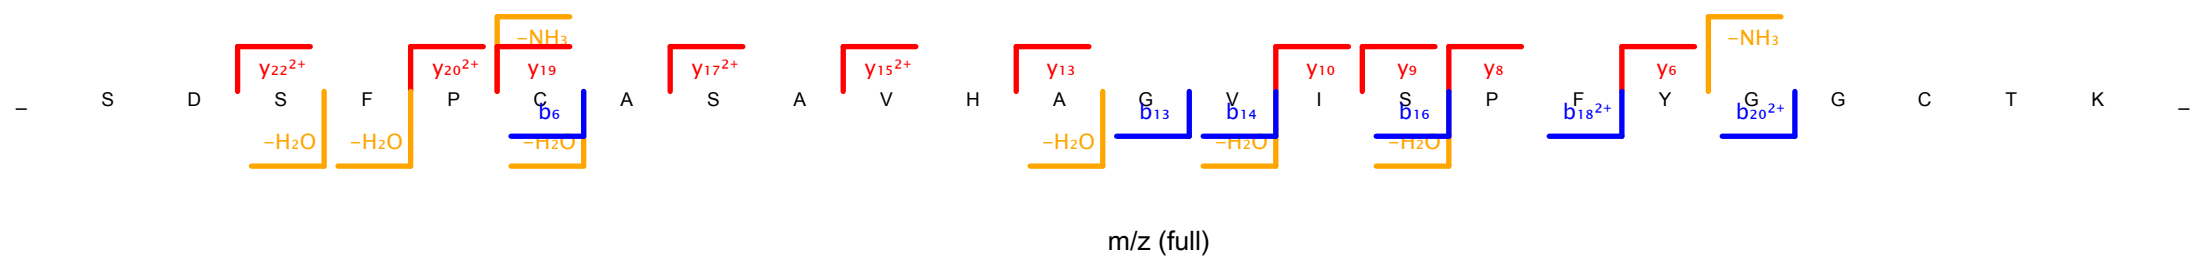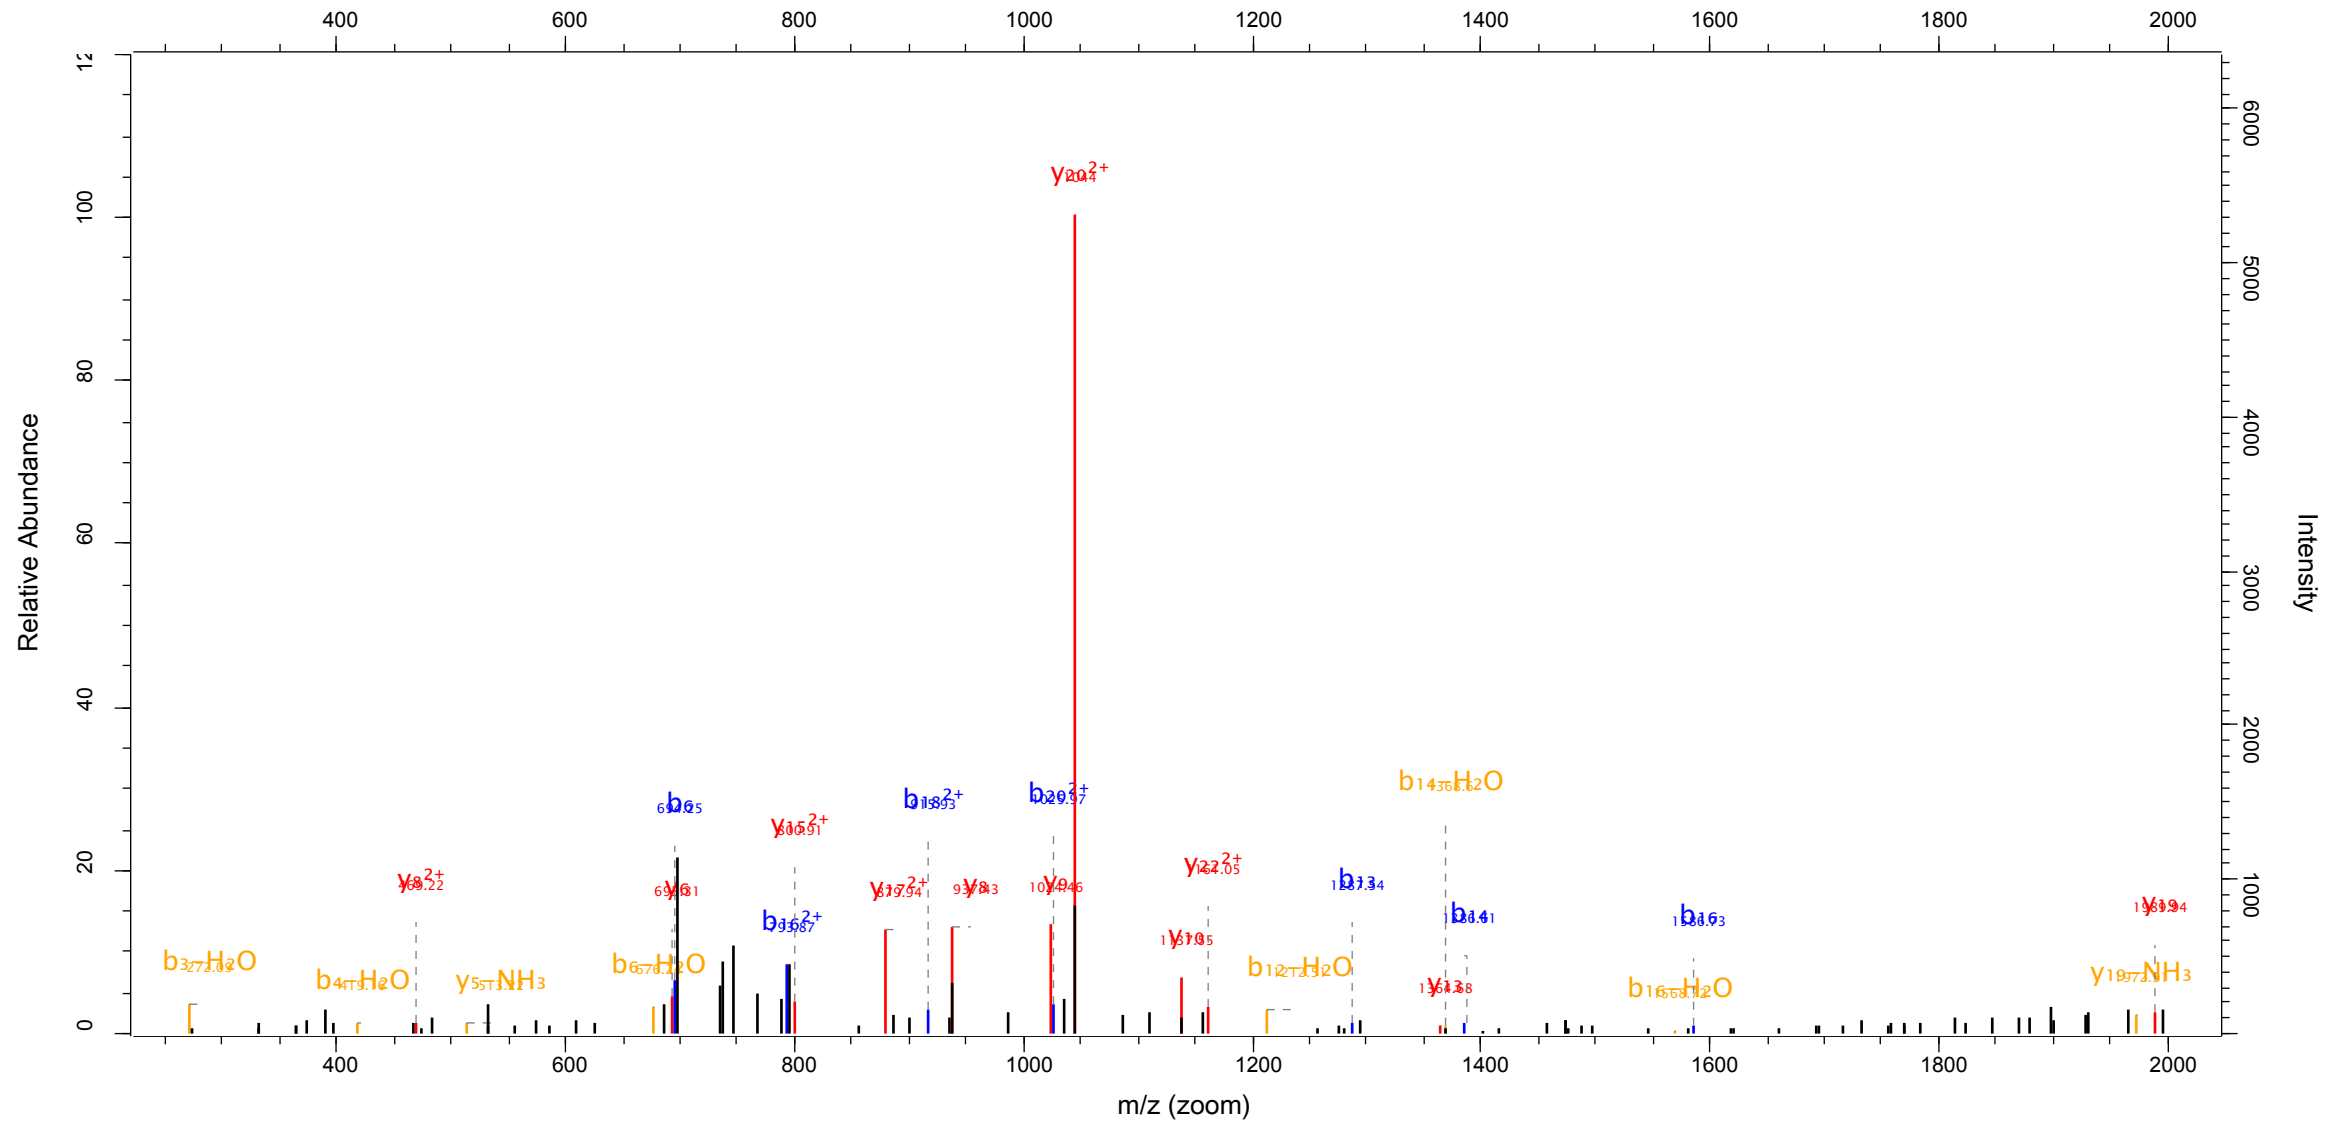

Scan number 14455 Raw file nak\_UBX3LSAX3\_28jan11\_21  
 Method ITMS; CID Pepti... 150.05

Protein Group 1544

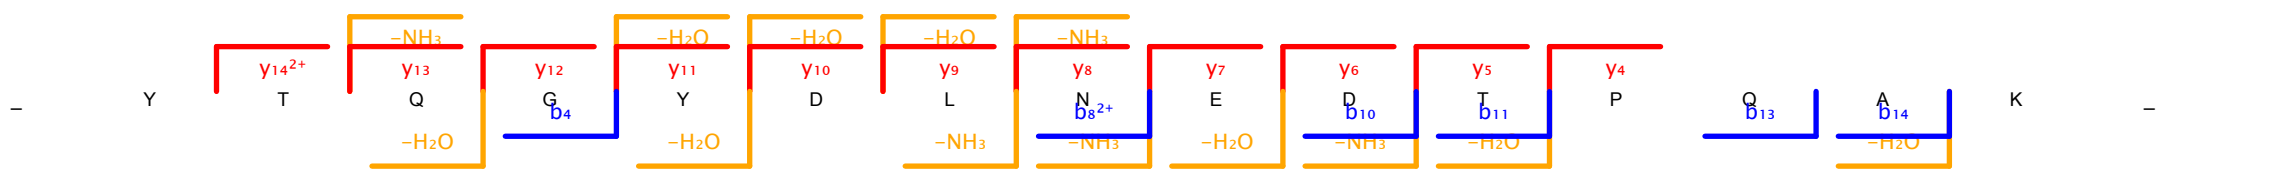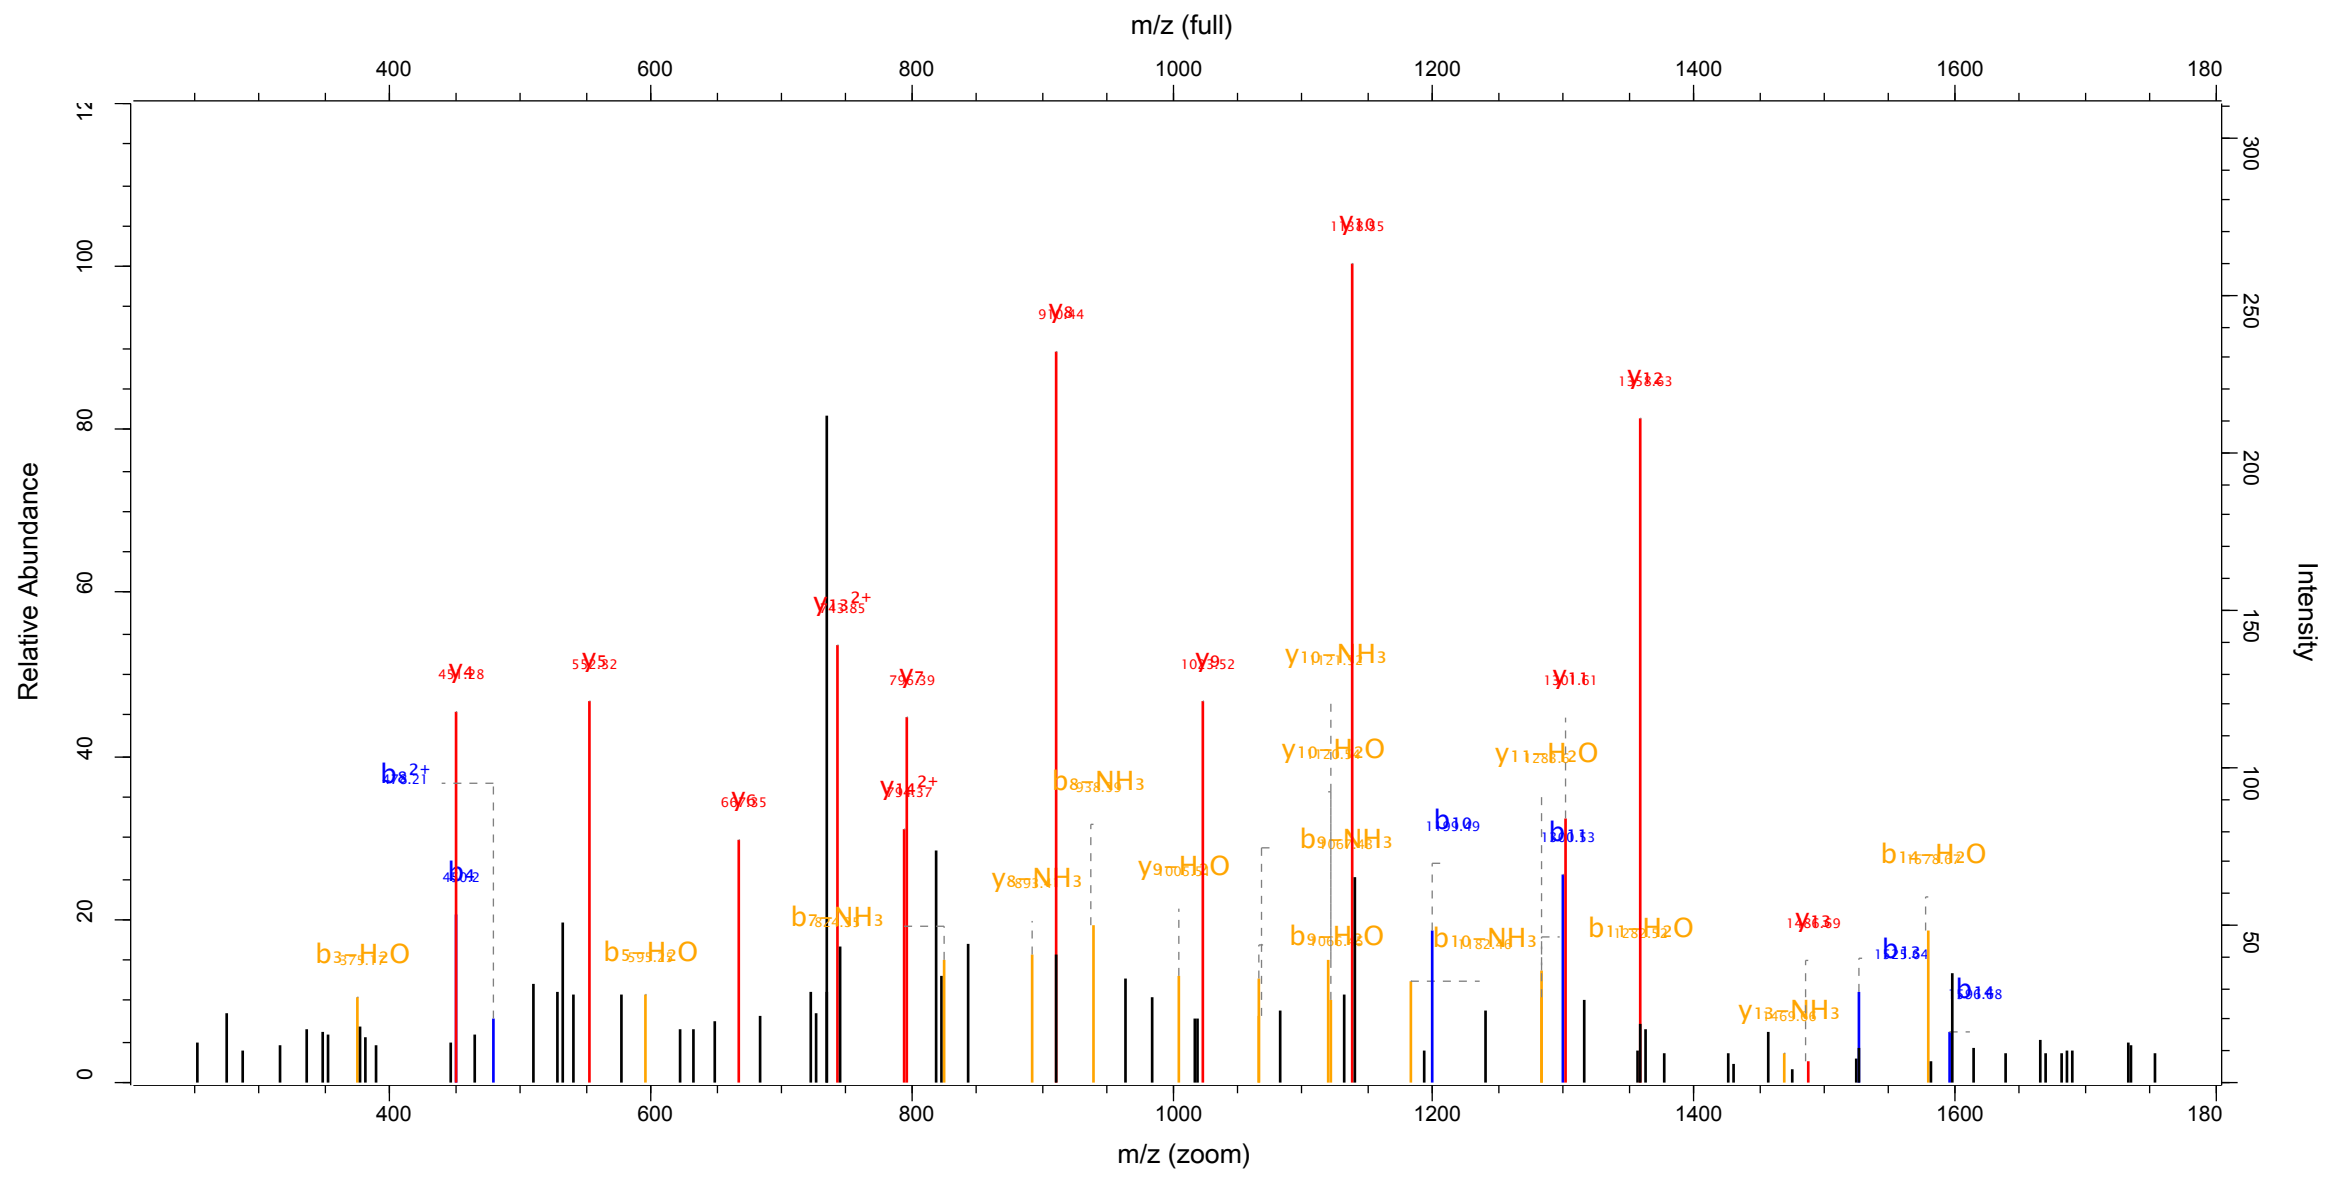

Scan number 35237 Raw file nak\_cdc48UbconjugatesSAX2\_21may13  
 Method ITMS; CID Pepti... 154.69

Protein Group 1548

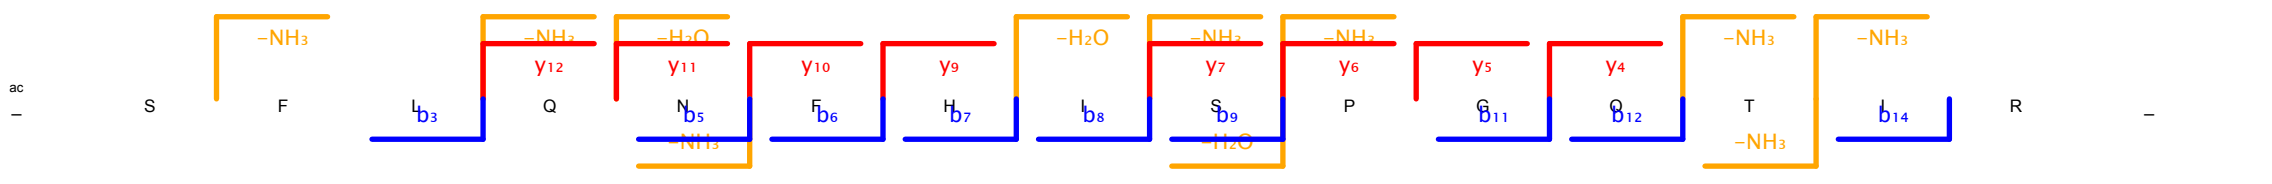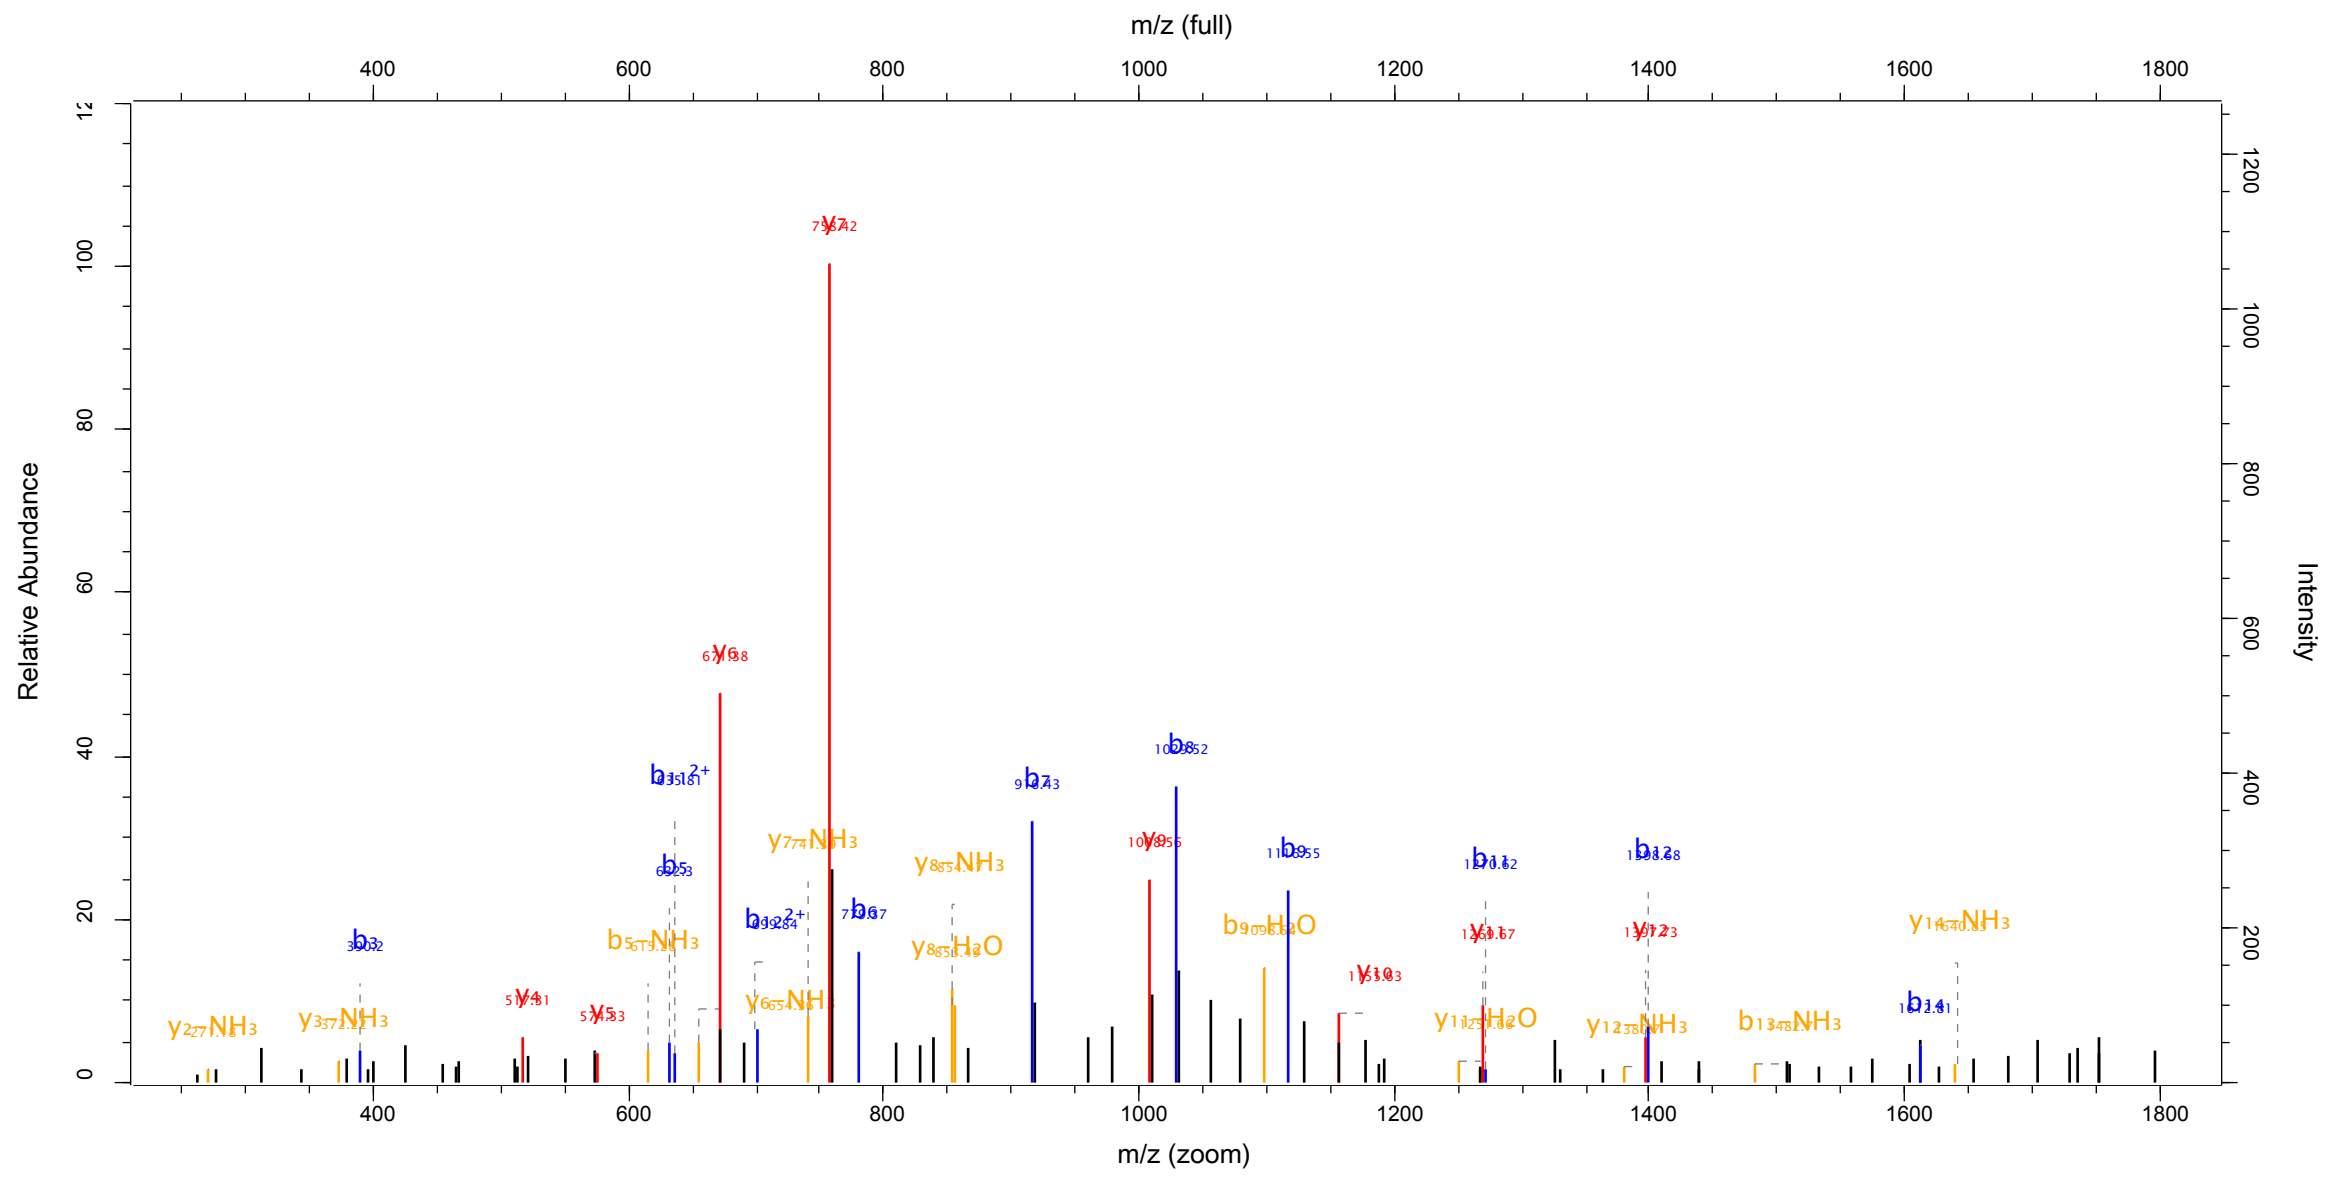

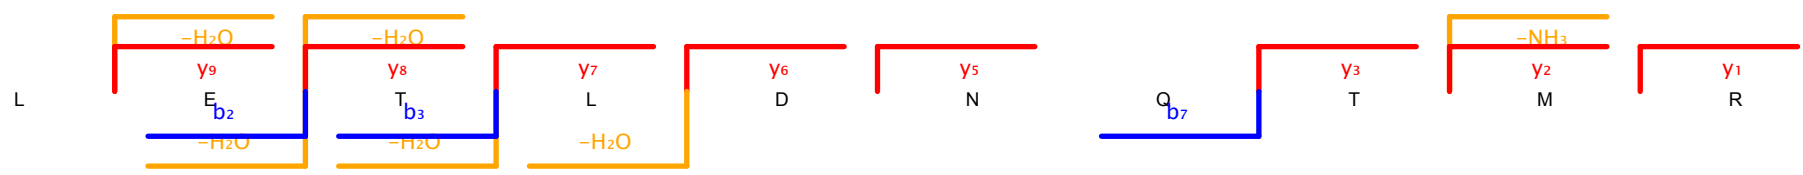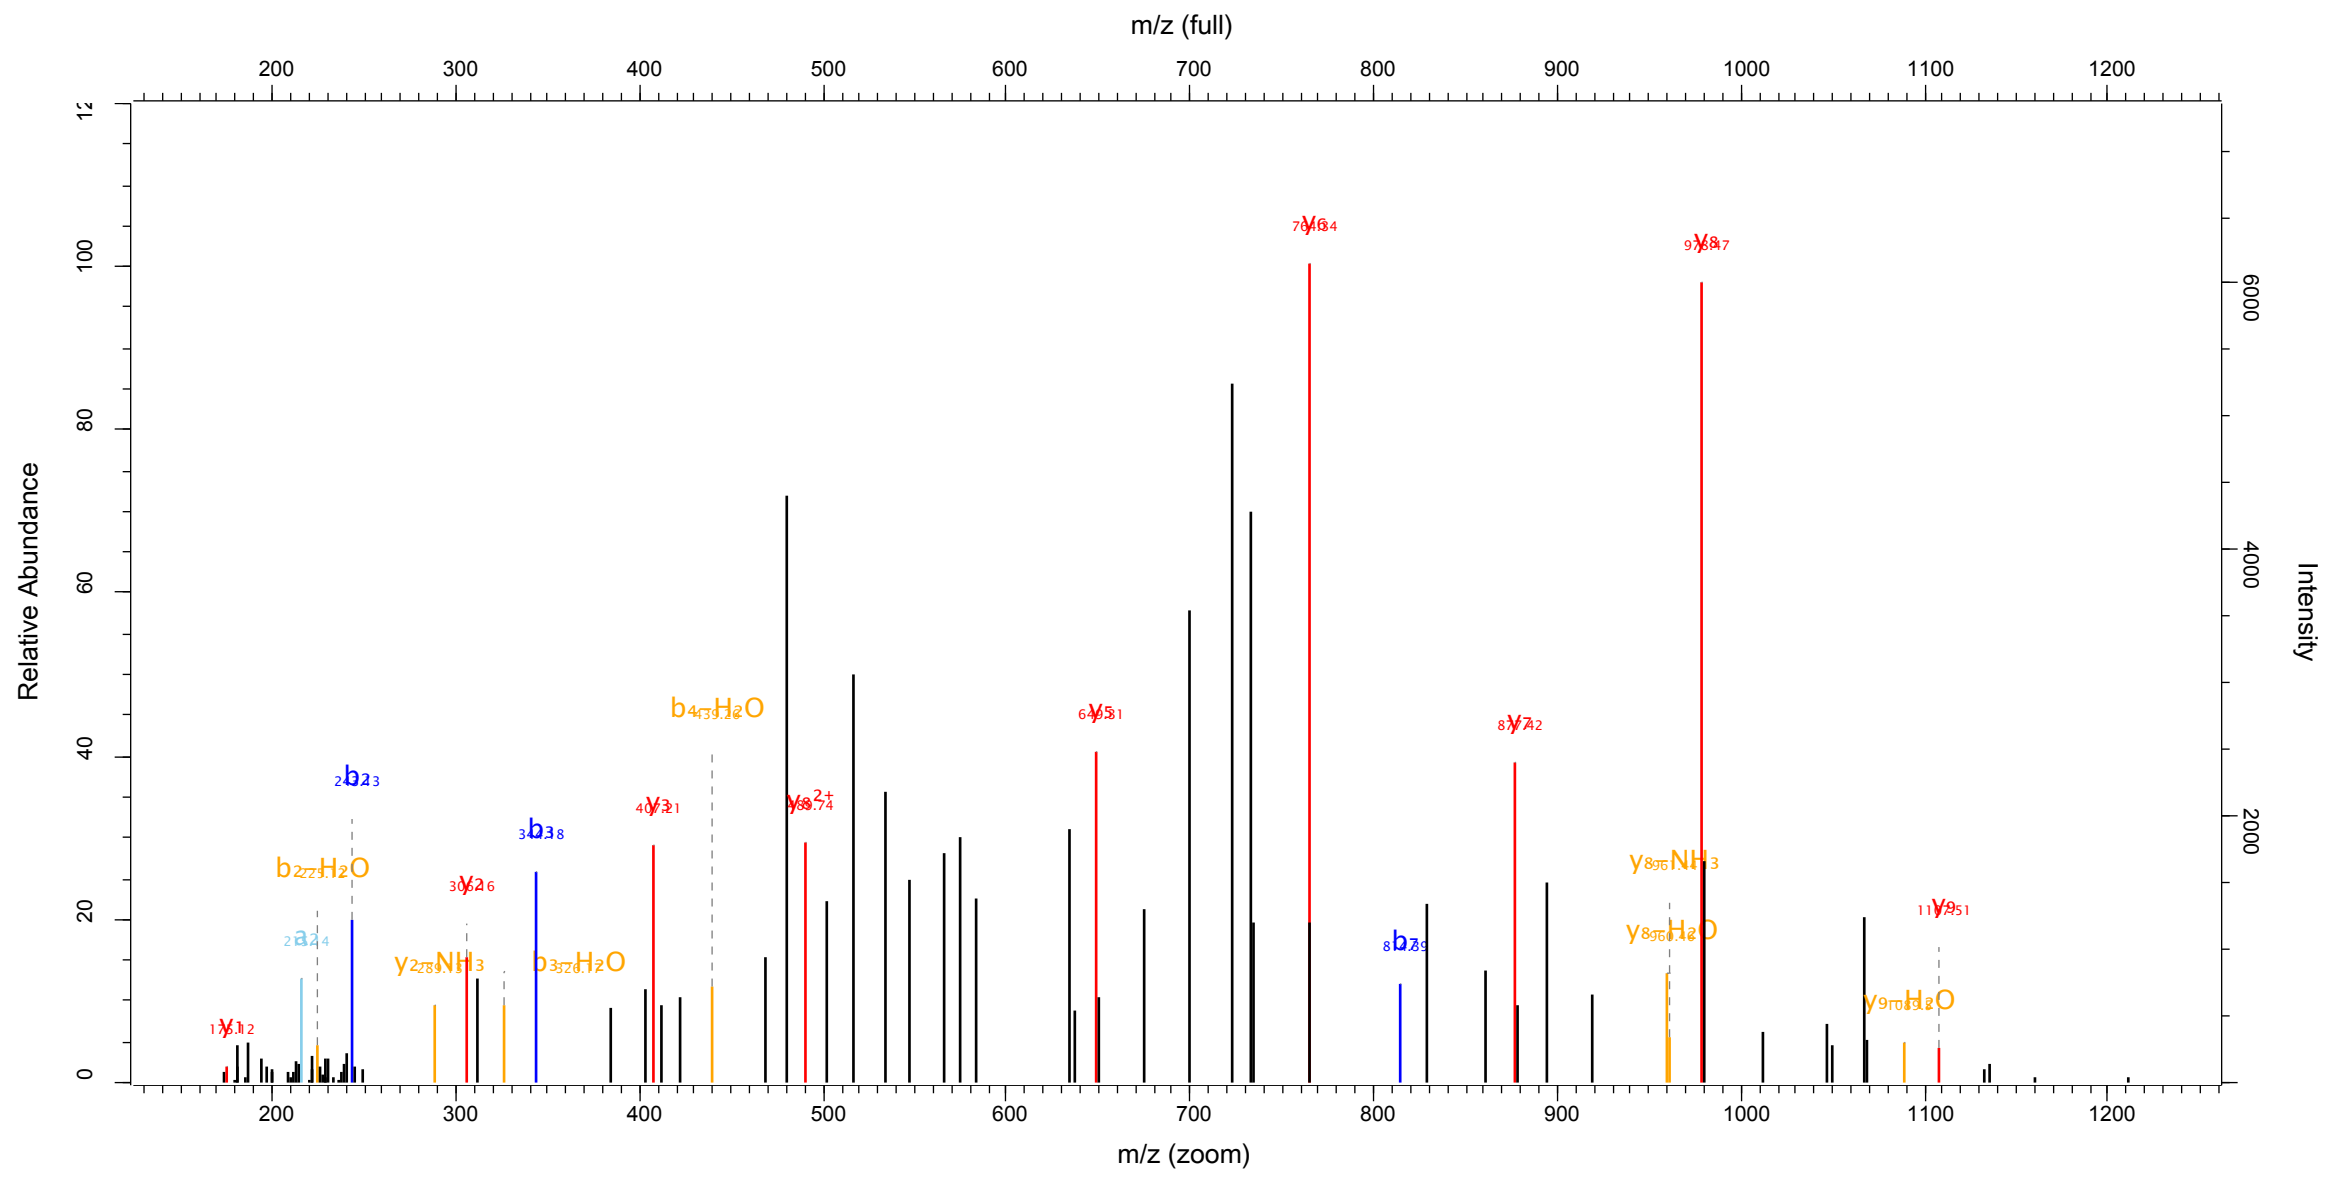

Scan number 24603  
Method ITMS; CID

Raw file nak\_cdc48UbconjugatecontrolSAX2\_22may10\_11  
Pepti... 99.75

Protein Group 1610

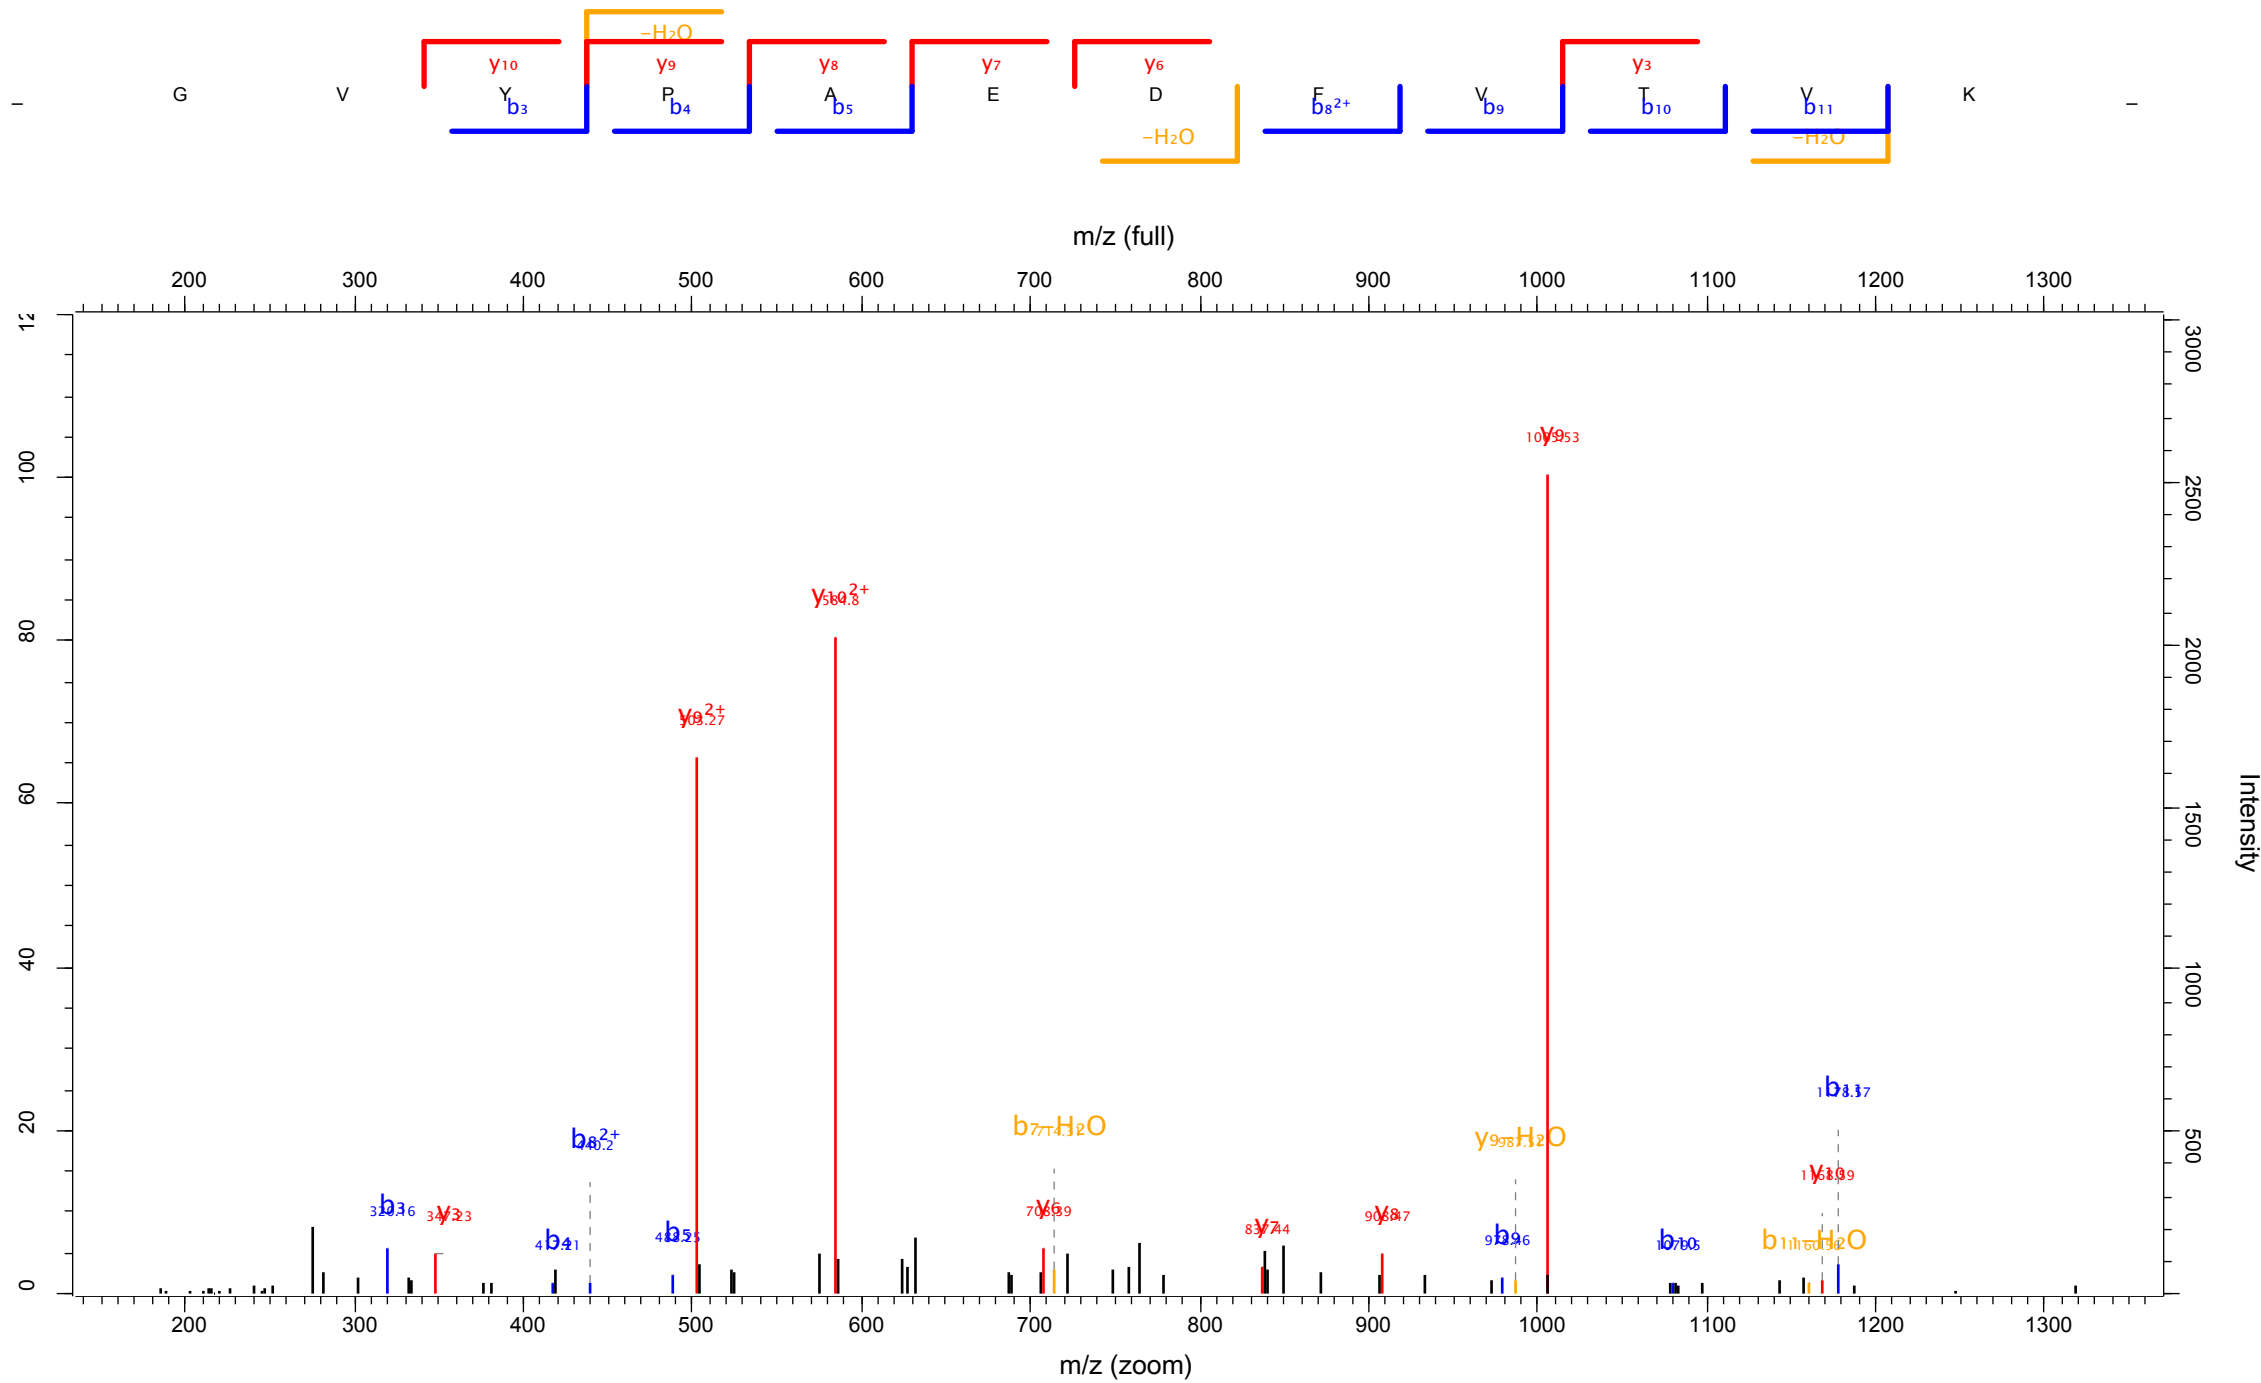

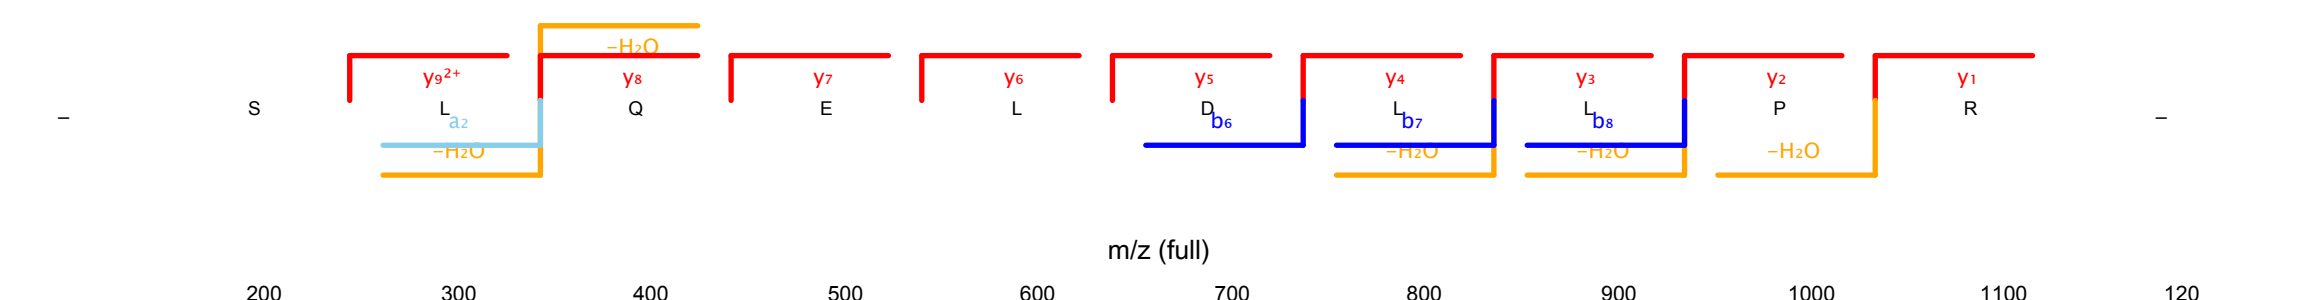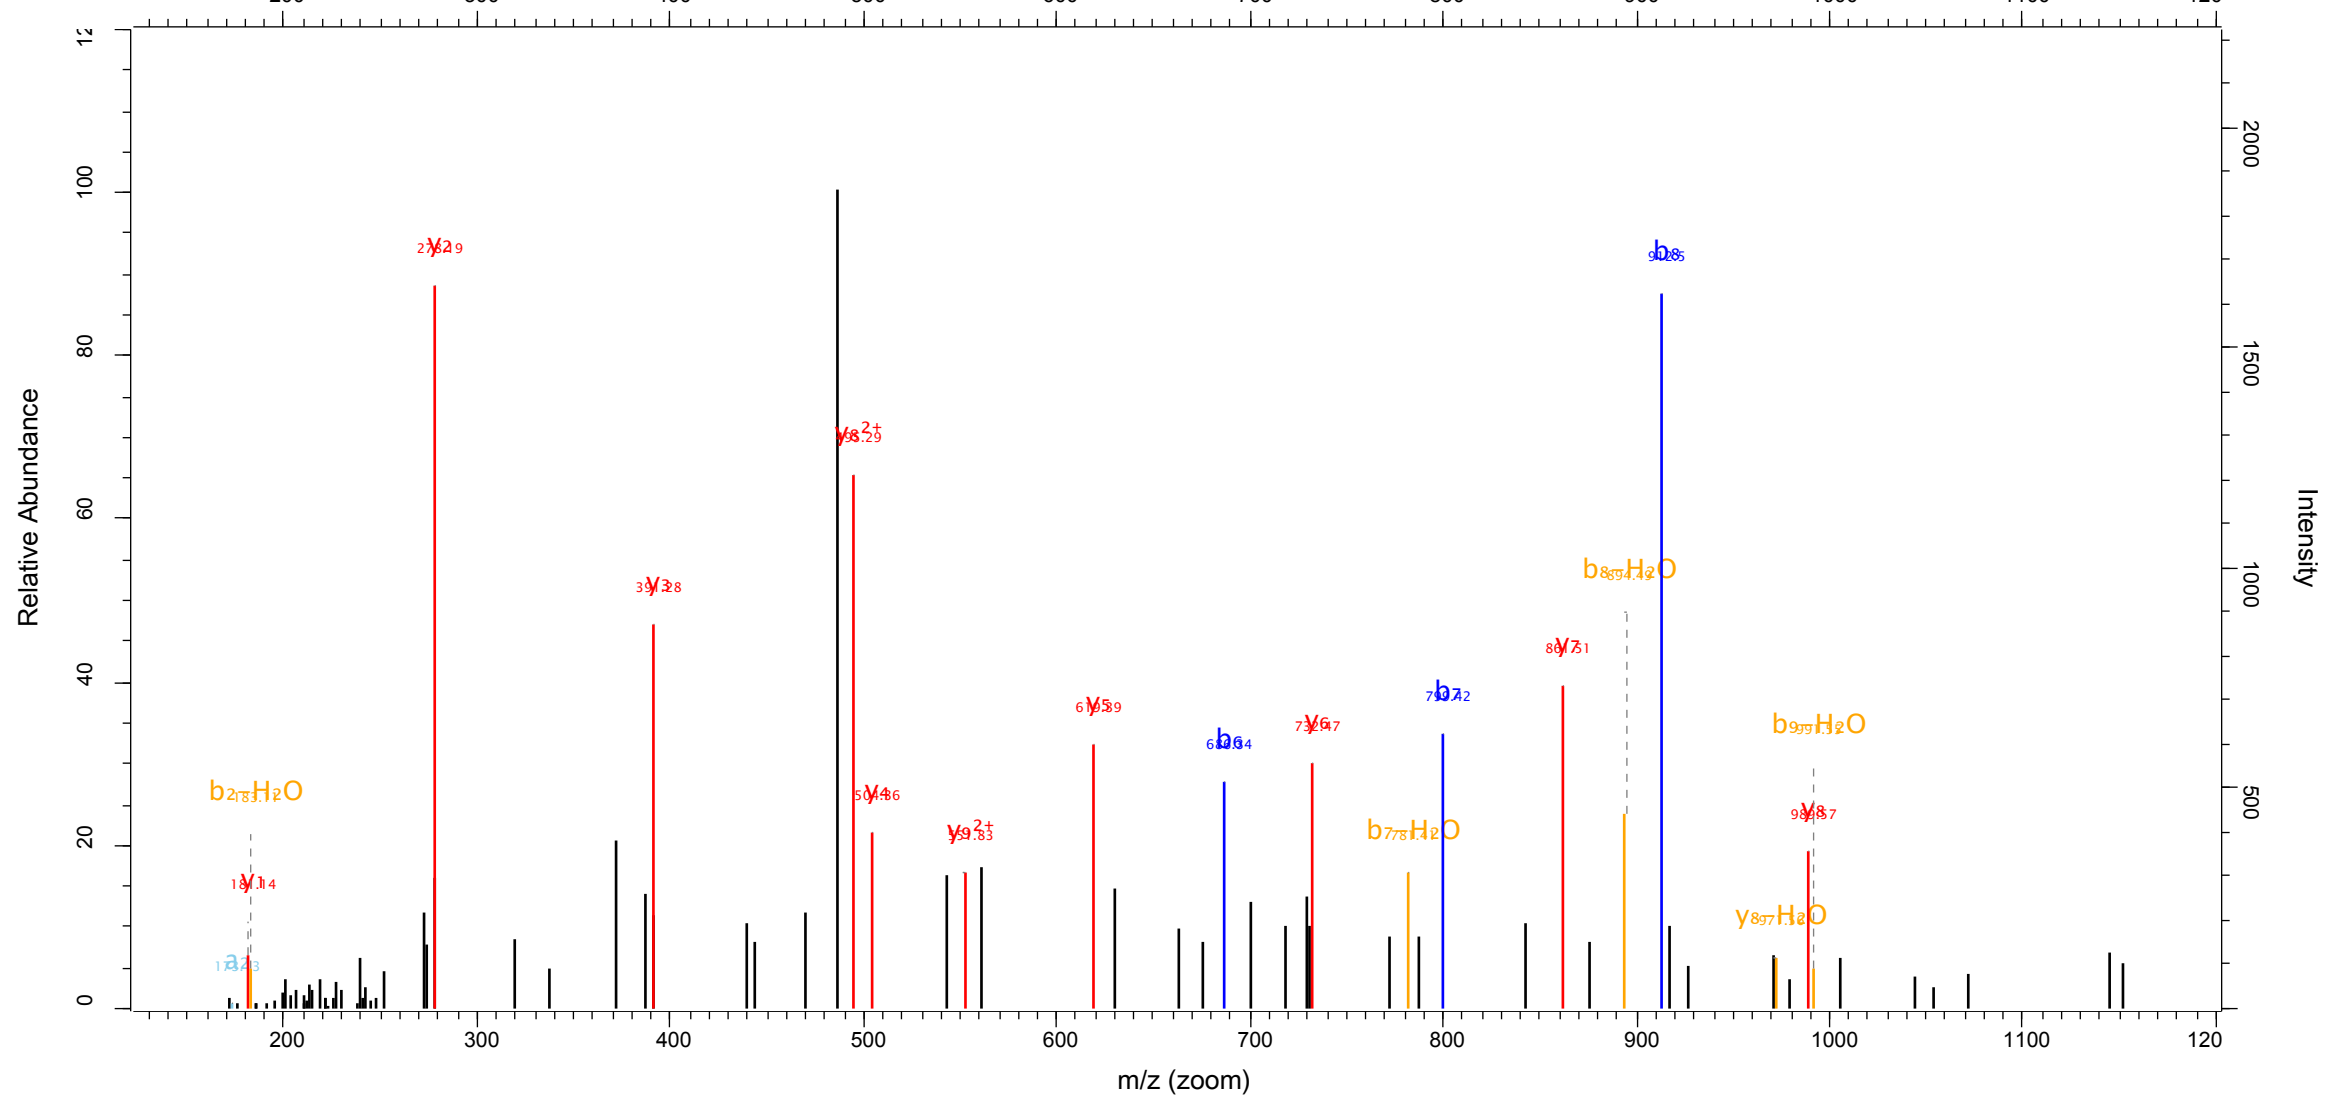



Scan number 15317 Raw file nak\_WTonetooneSAX2\_4feb11\_02  
 Method ITMS; CID Pepti... 72.7

Protein Group 1634

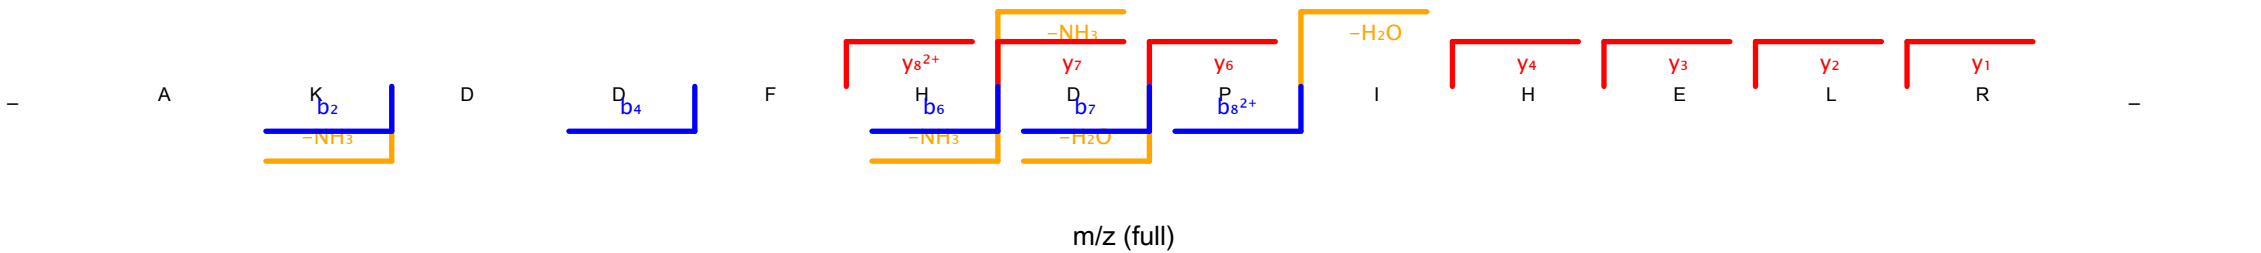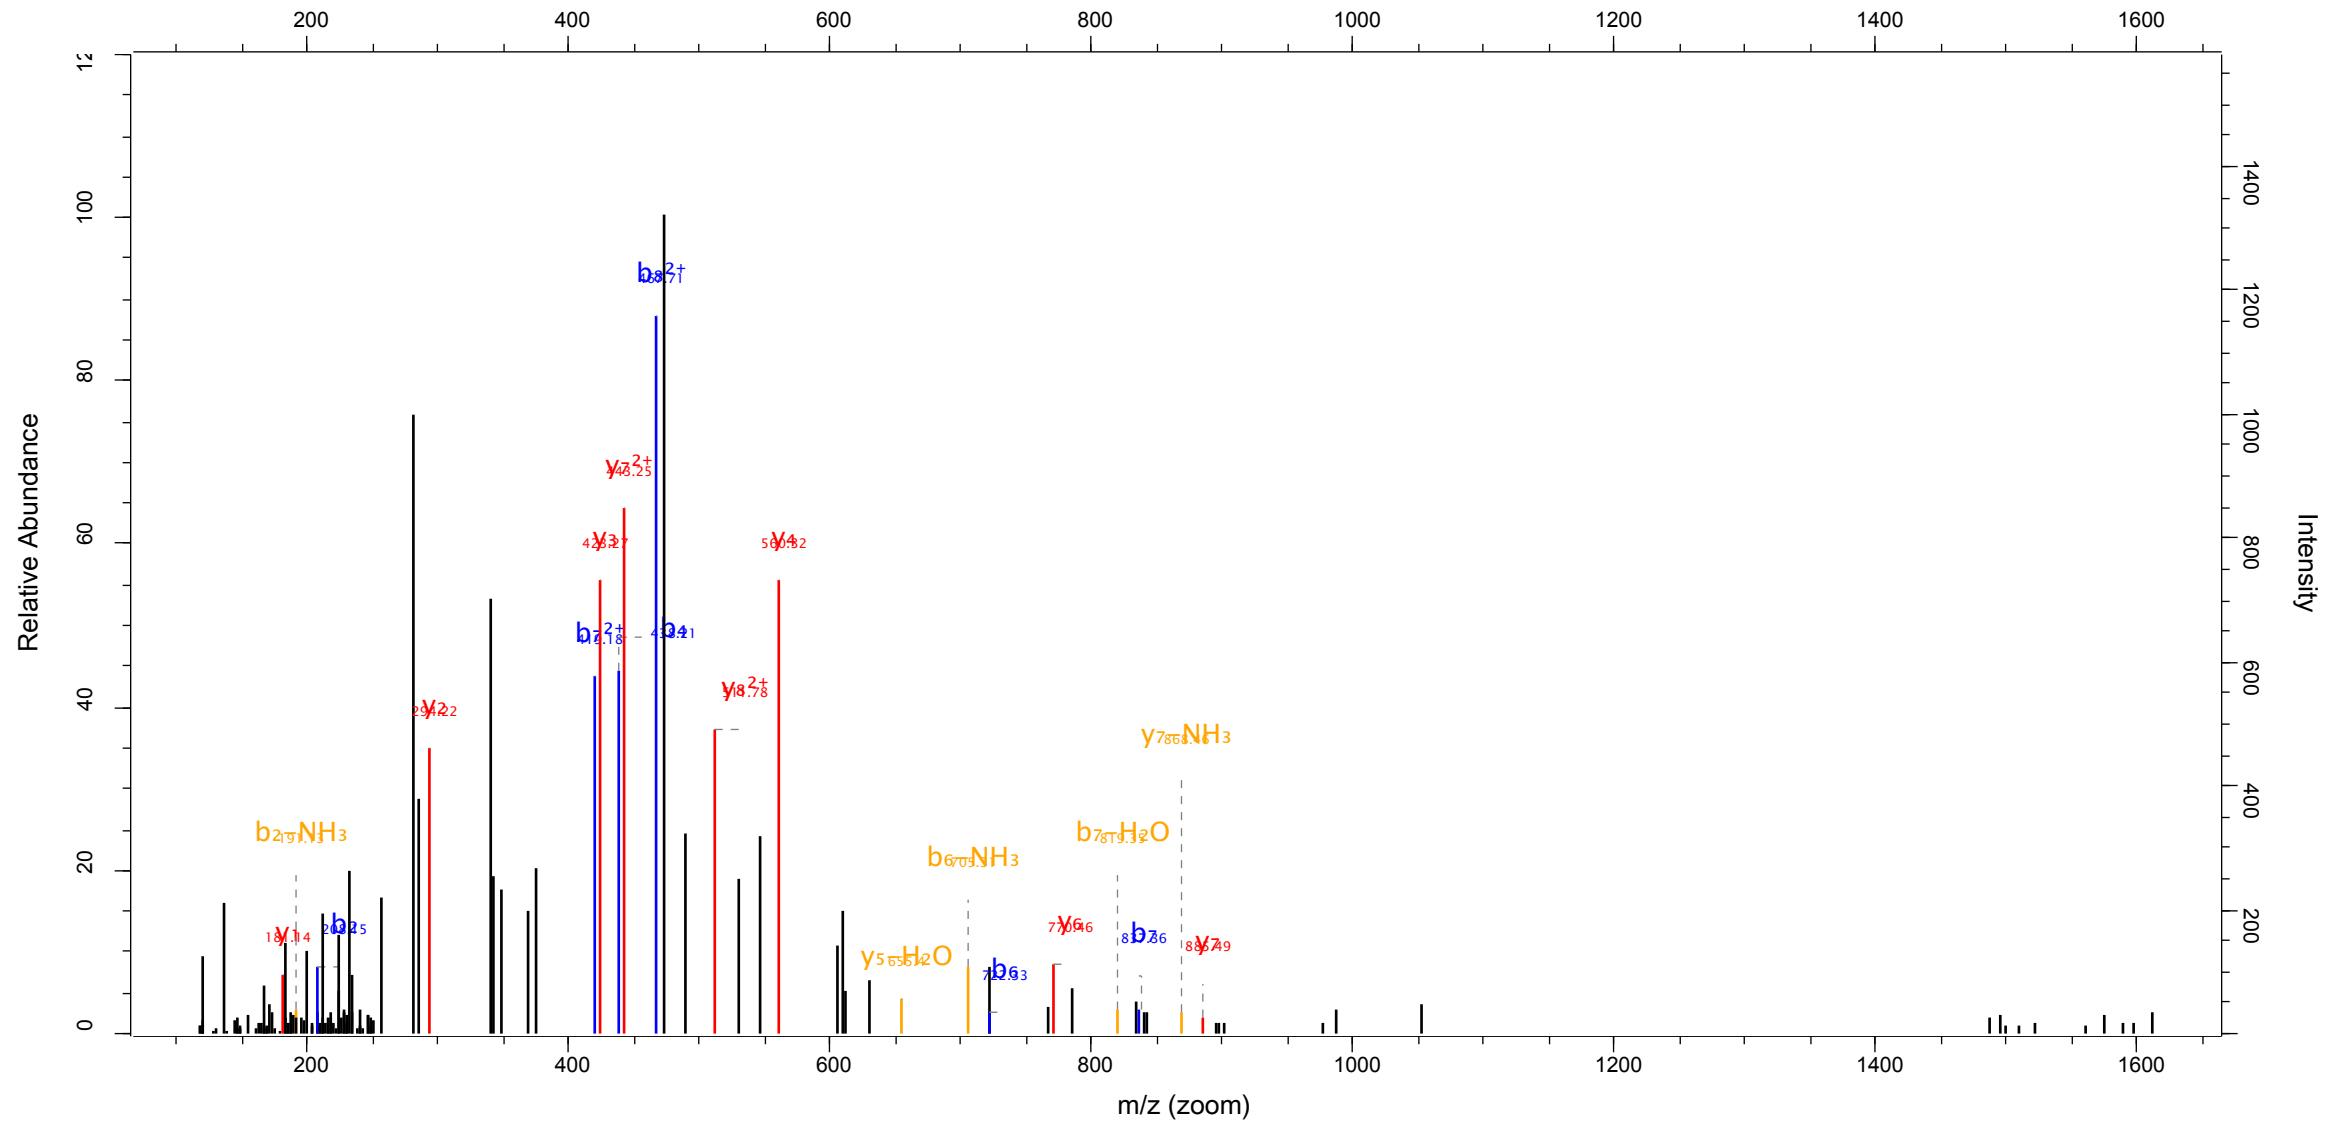

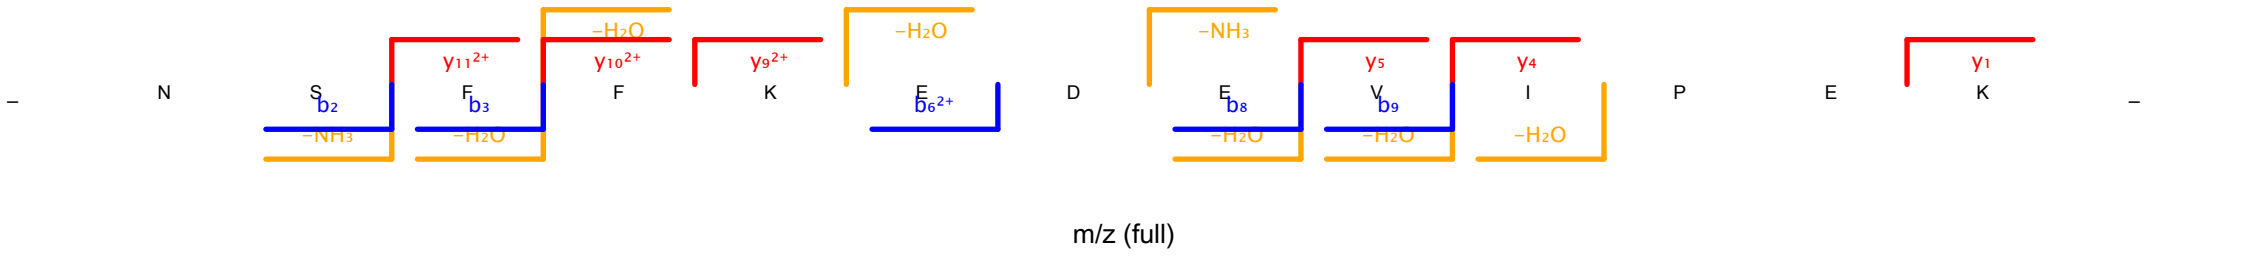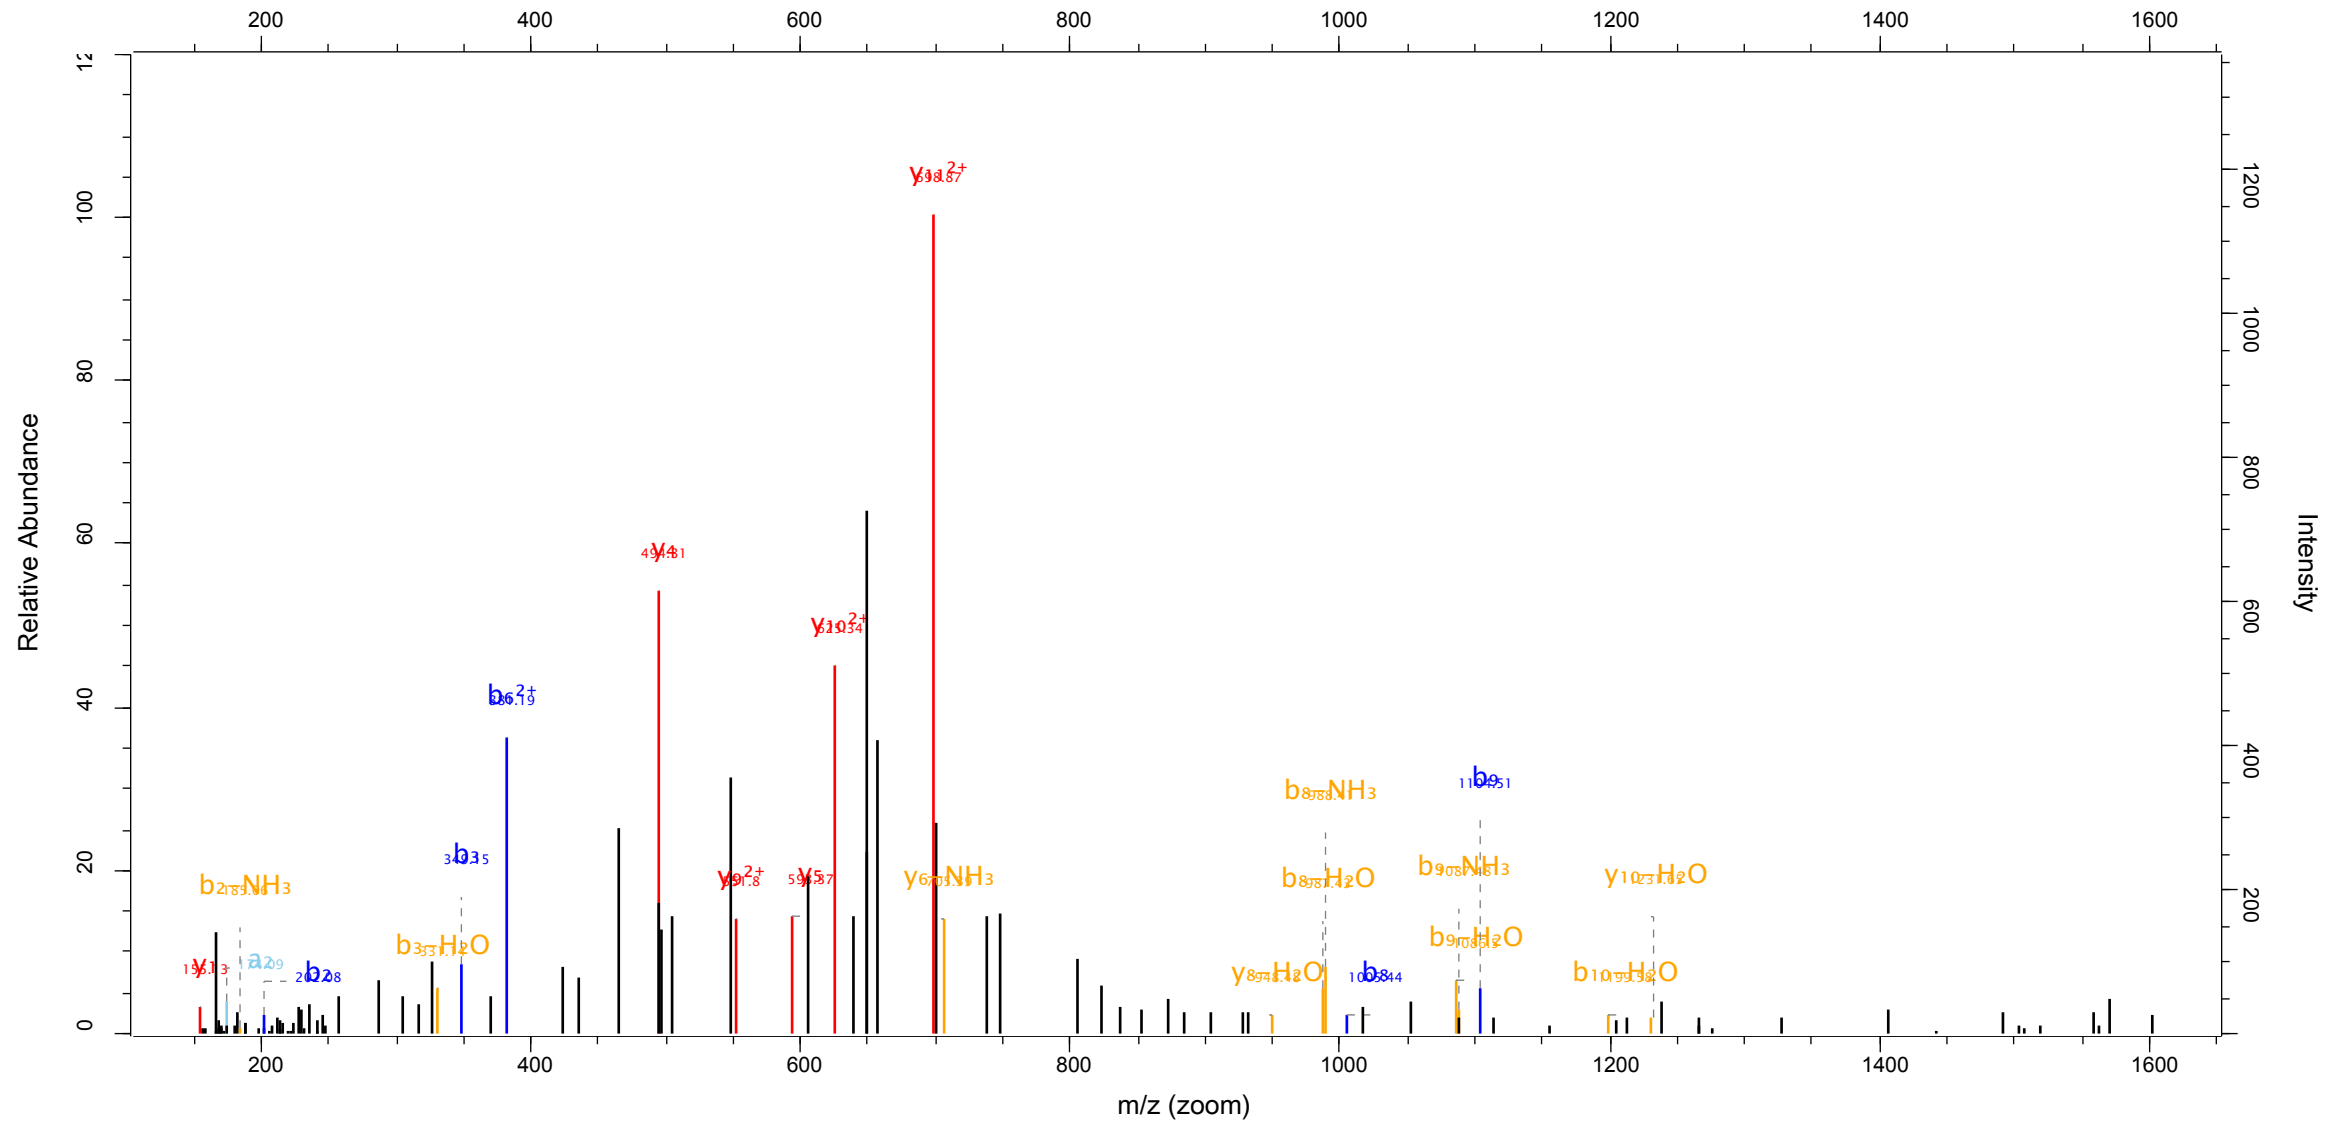

Scan number 8552 Raw file nak\_WTonetooneSAX6\_4feb11\_06  
 Method ITMS; CID Pepti... 85.54

Protein Group 1733

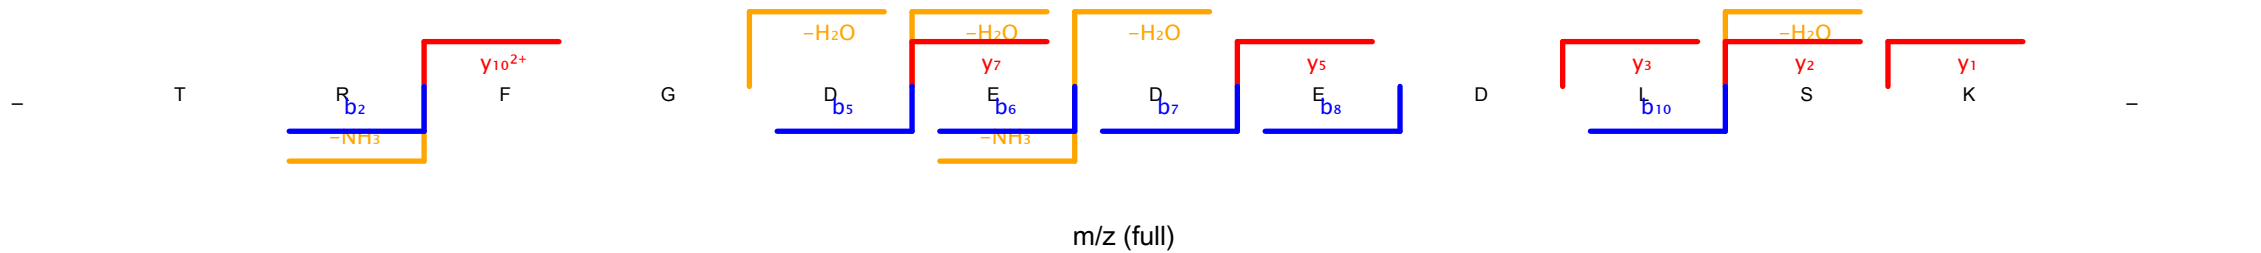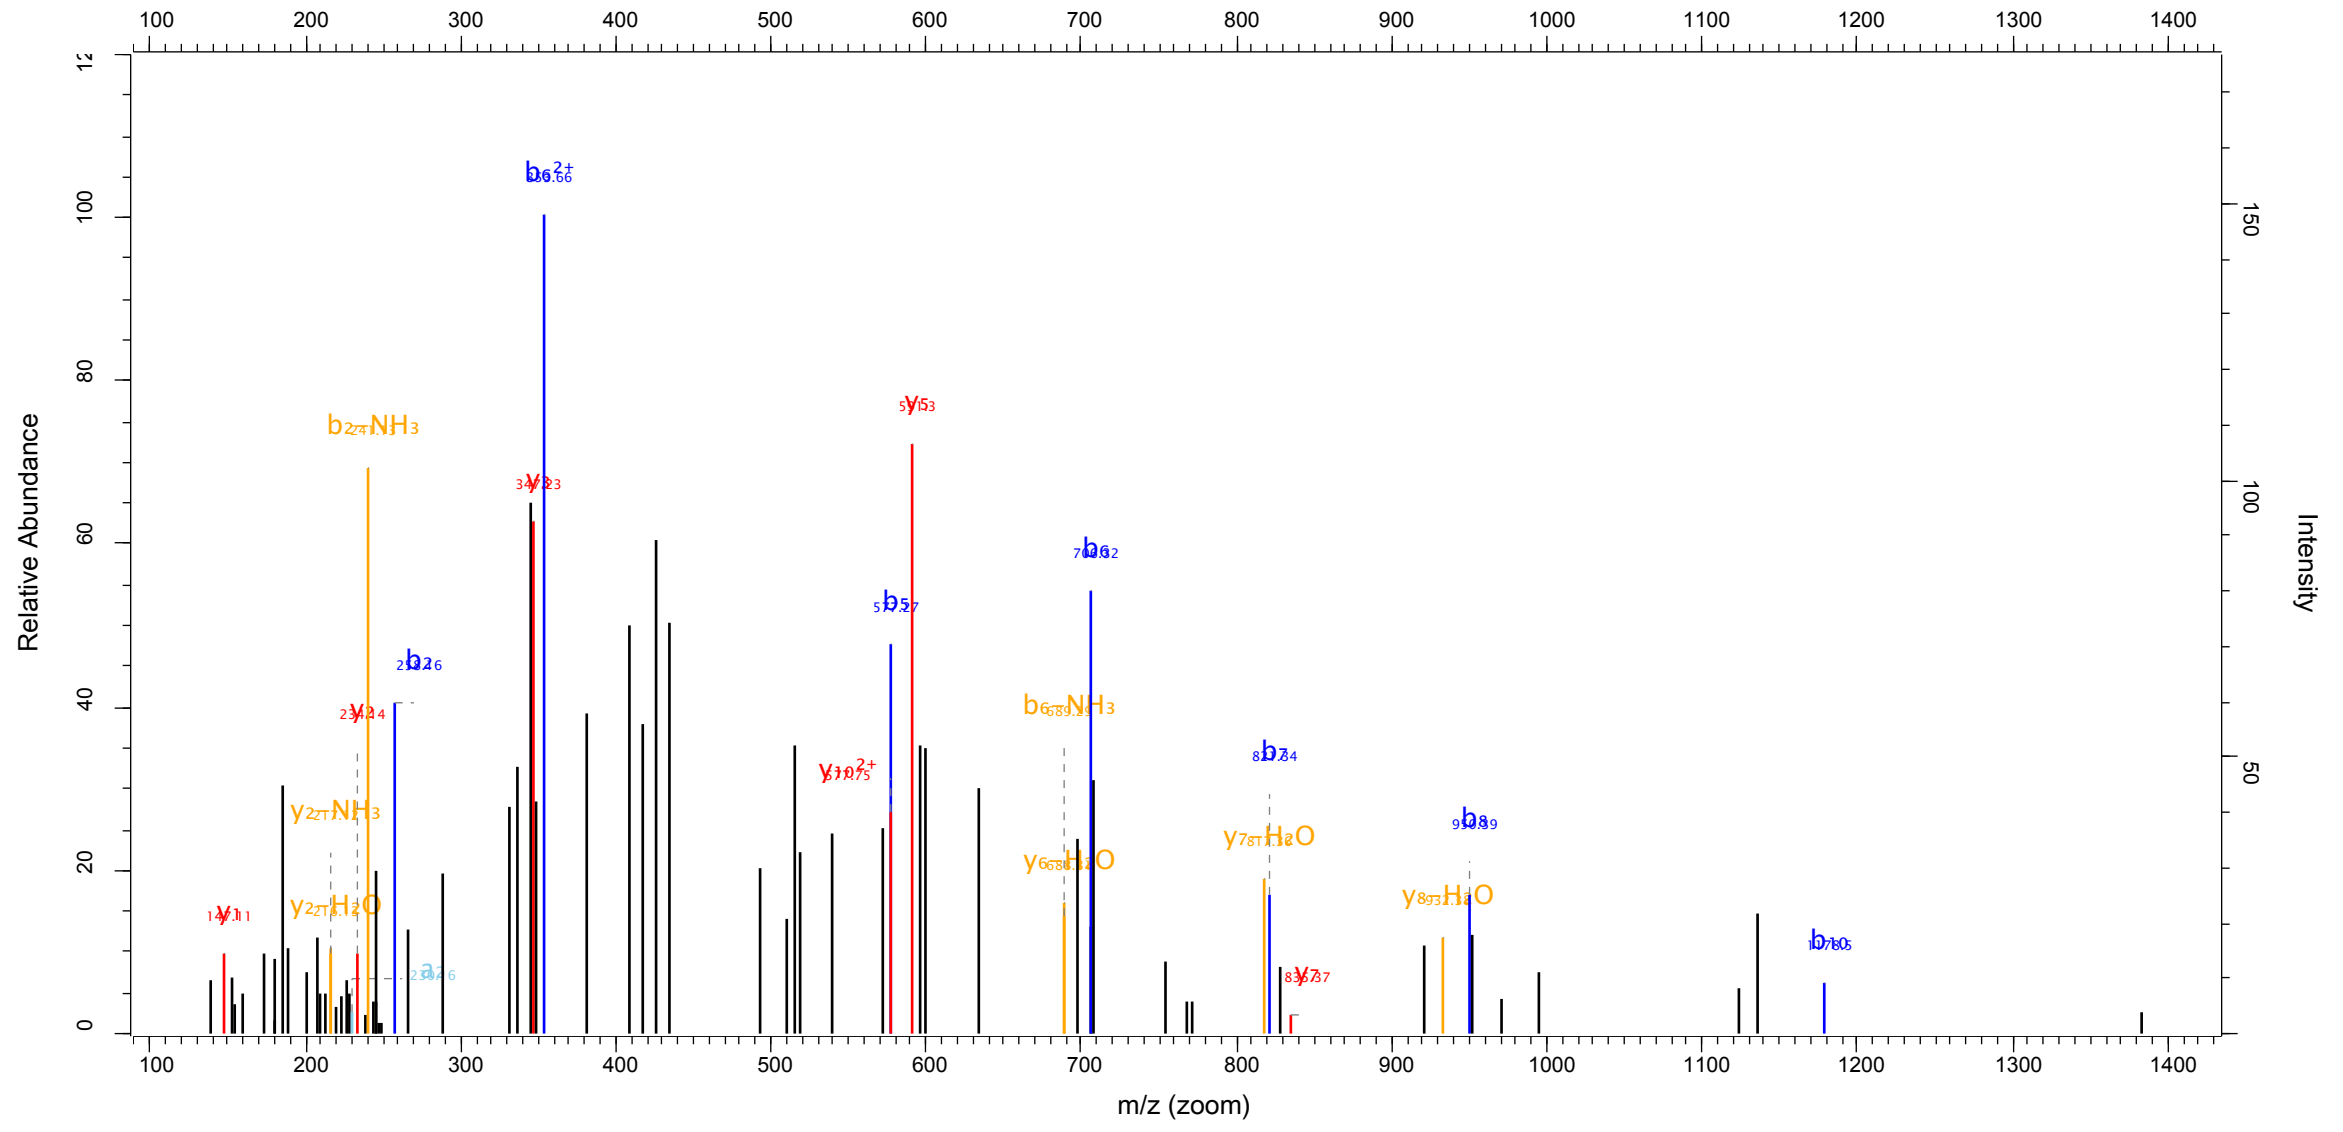

Scan number 36316  
Method ITMS; CID

Raw file nak\_cdc48UbconjugatesSAX4\_14may10\_08  
Pepti... 147.16

Protein Group 1745

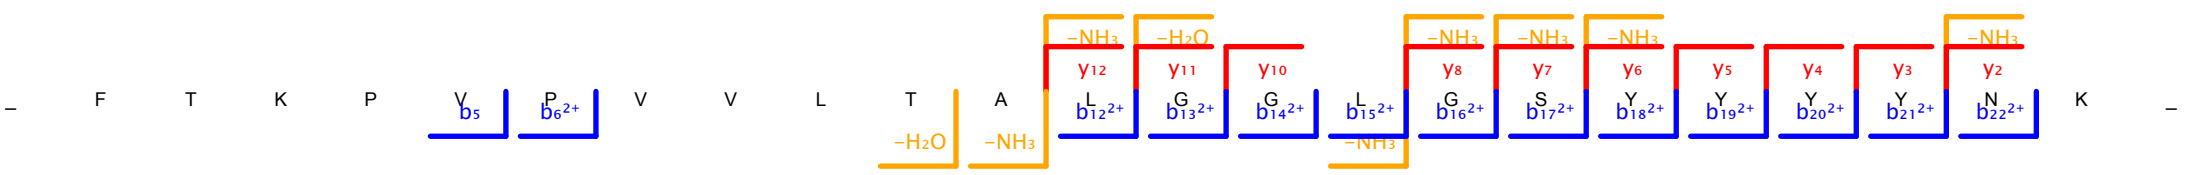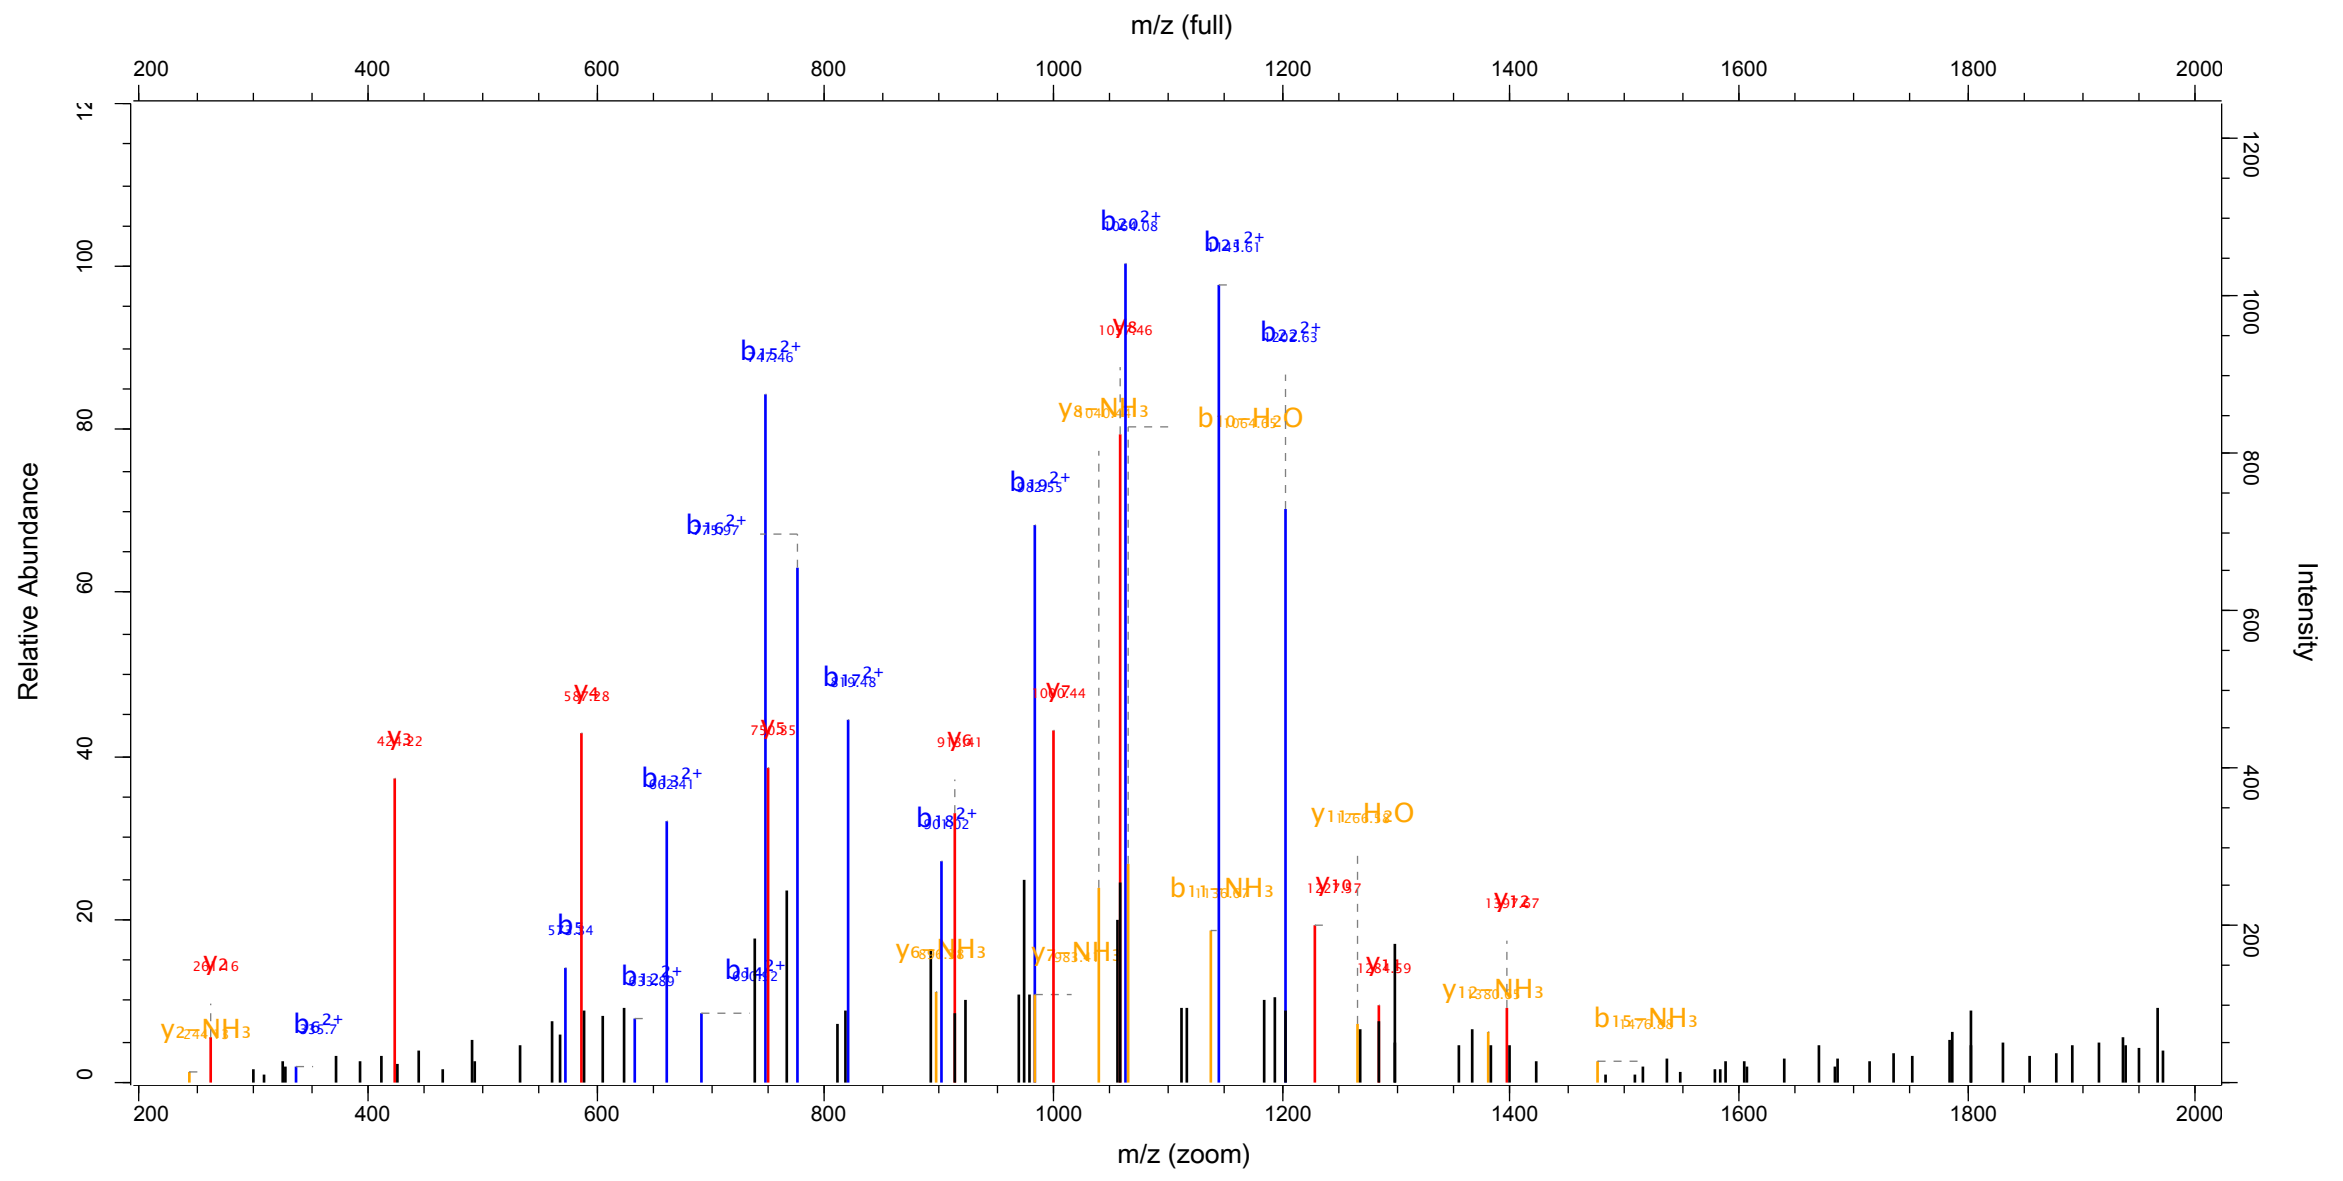

Scan number 33399 Raw file nak\_cdc48UbconjugatesSAX4\_21may15  
 Method ITMS; CID Pepti... 41.11

**Protein Group 1757**

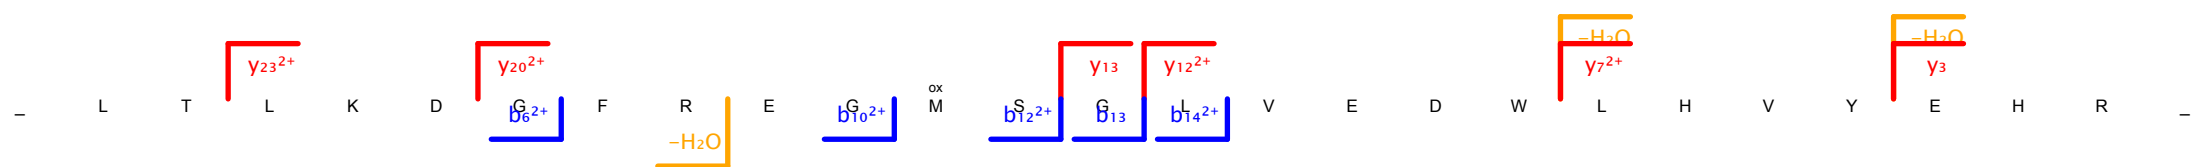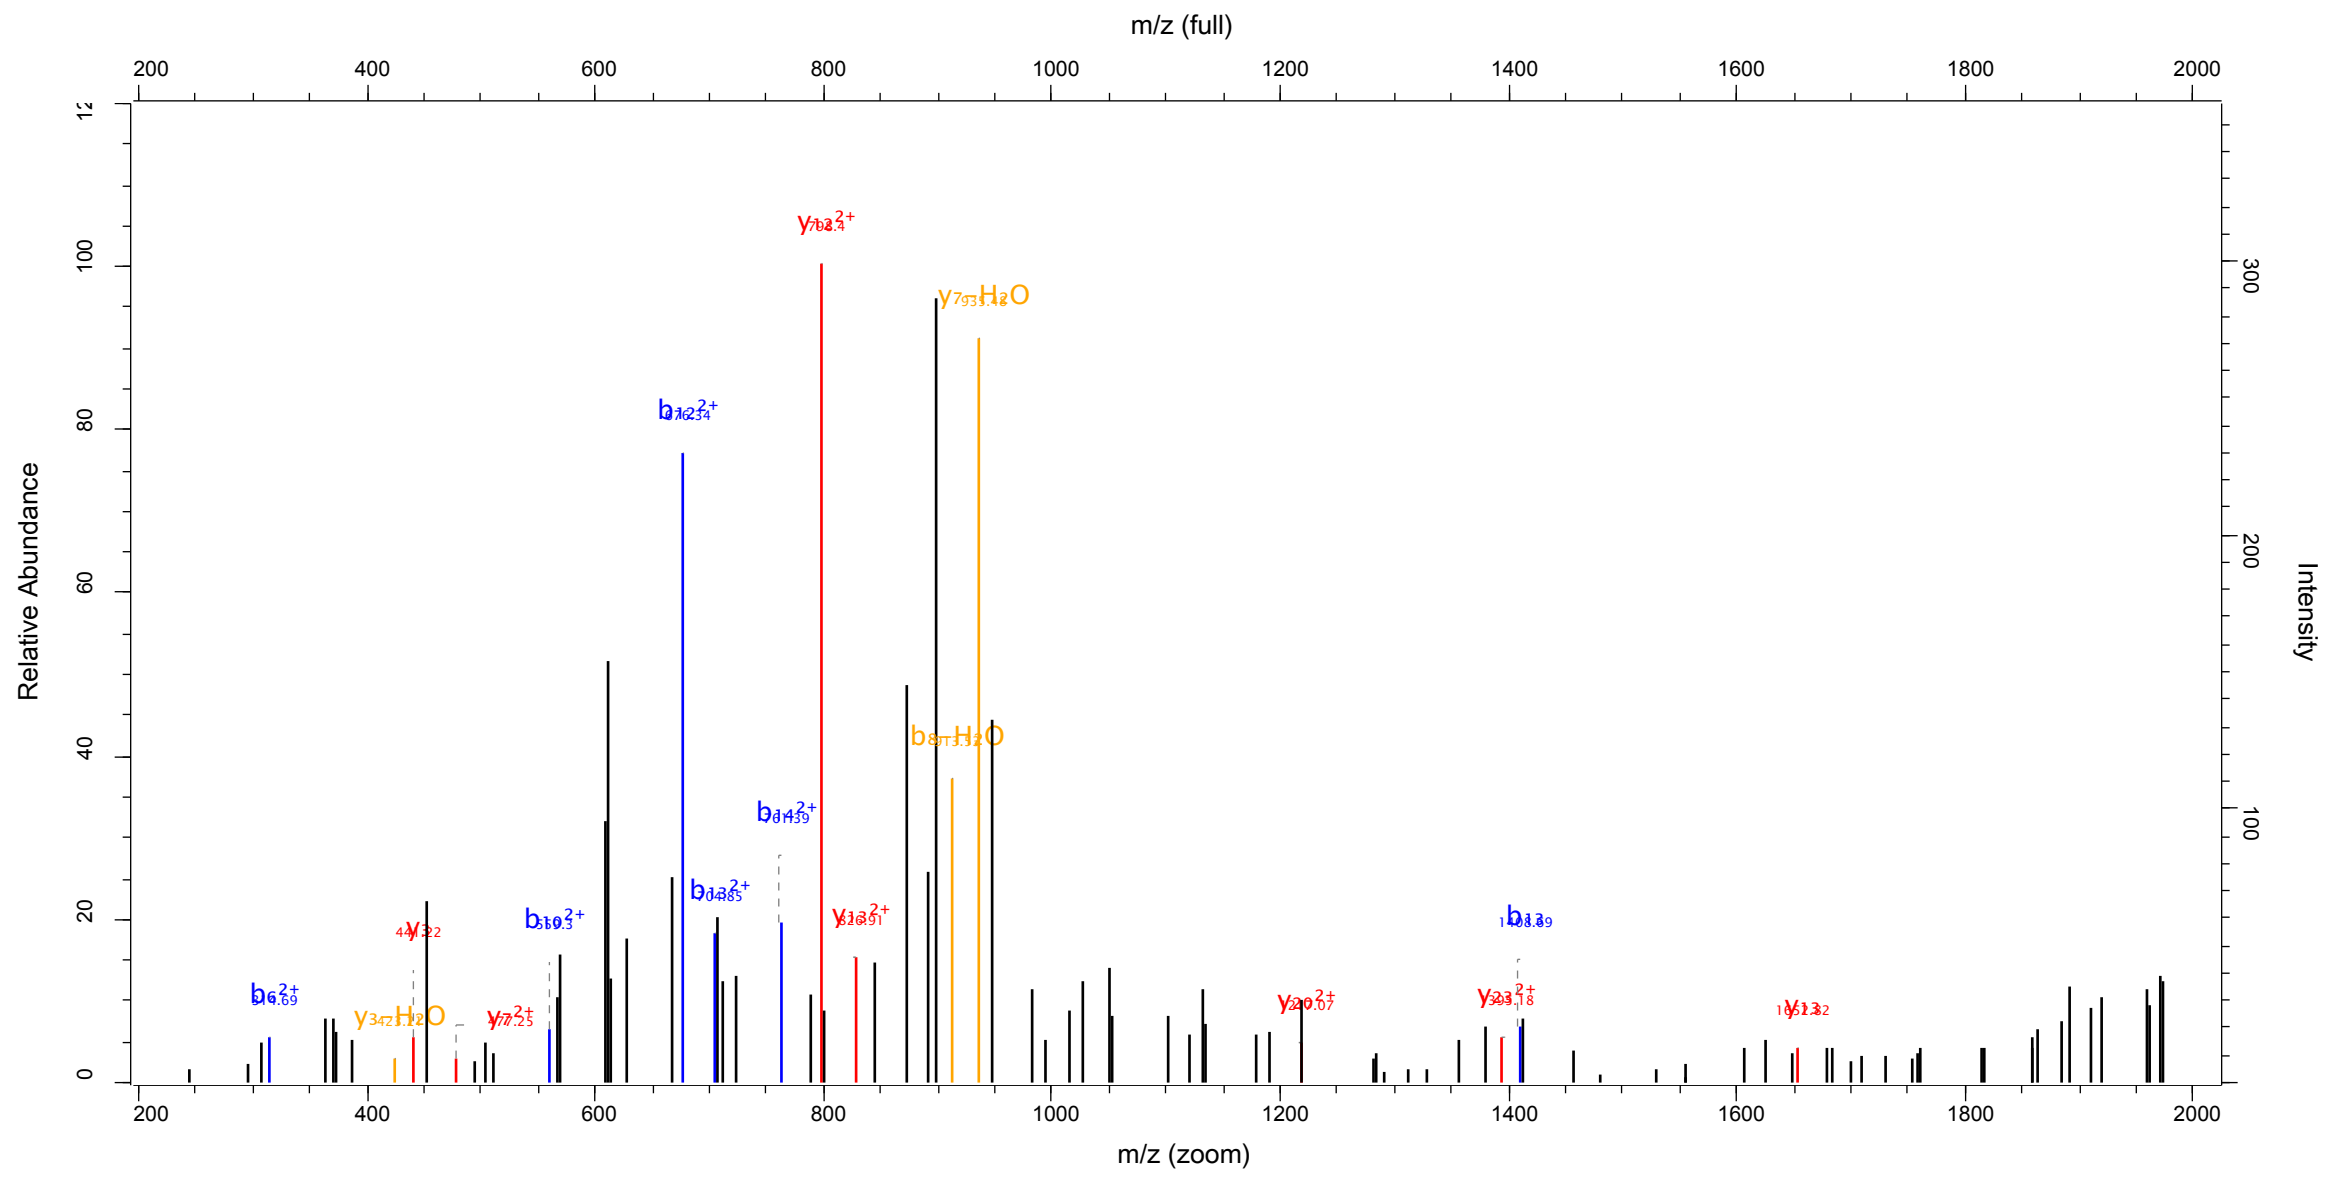

Scan number 12376 Raw file nak\_UBX3HSAX5\_28jan11\_31  
 Method ITMS; CID Pepti... 76.33

Protein Group 1805

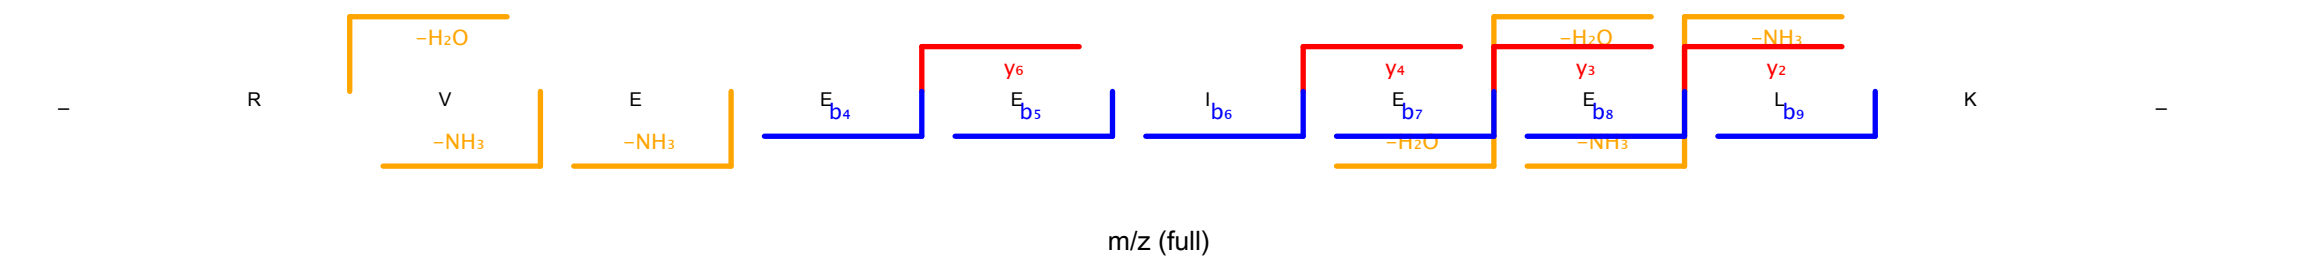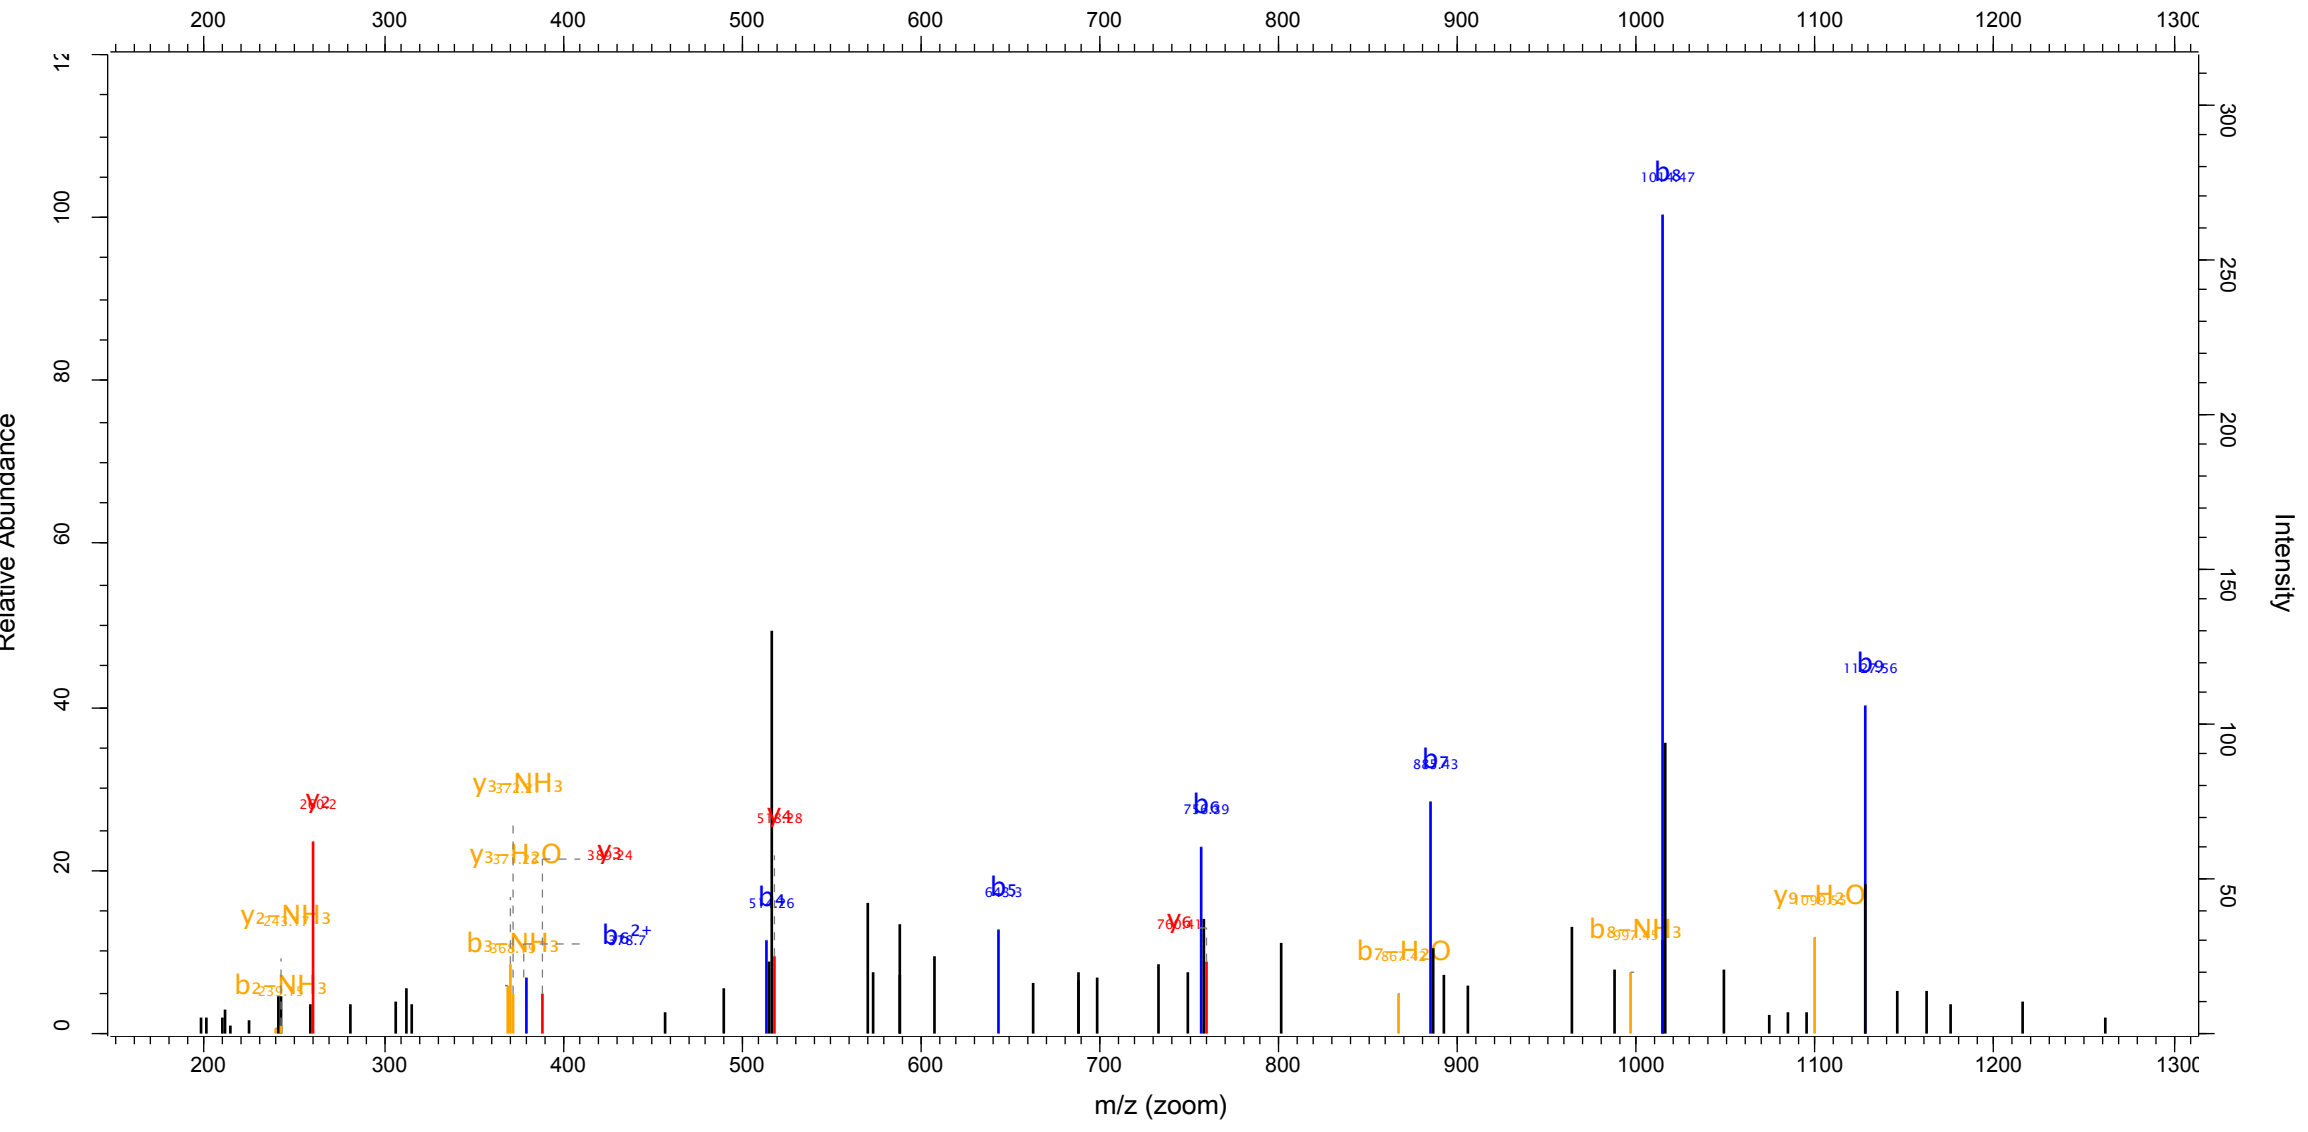

Scan number 31253 Raw file nak\_UBX6SAX3L\_14jan11\_13  
 Method ITMS; CID Pepti... 34.22

**Protein Group 1806**

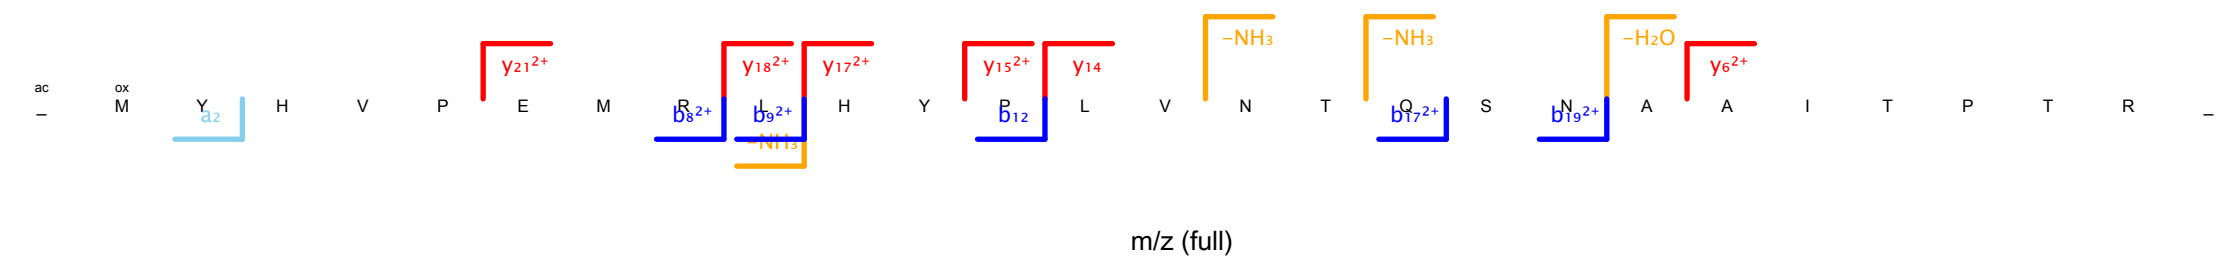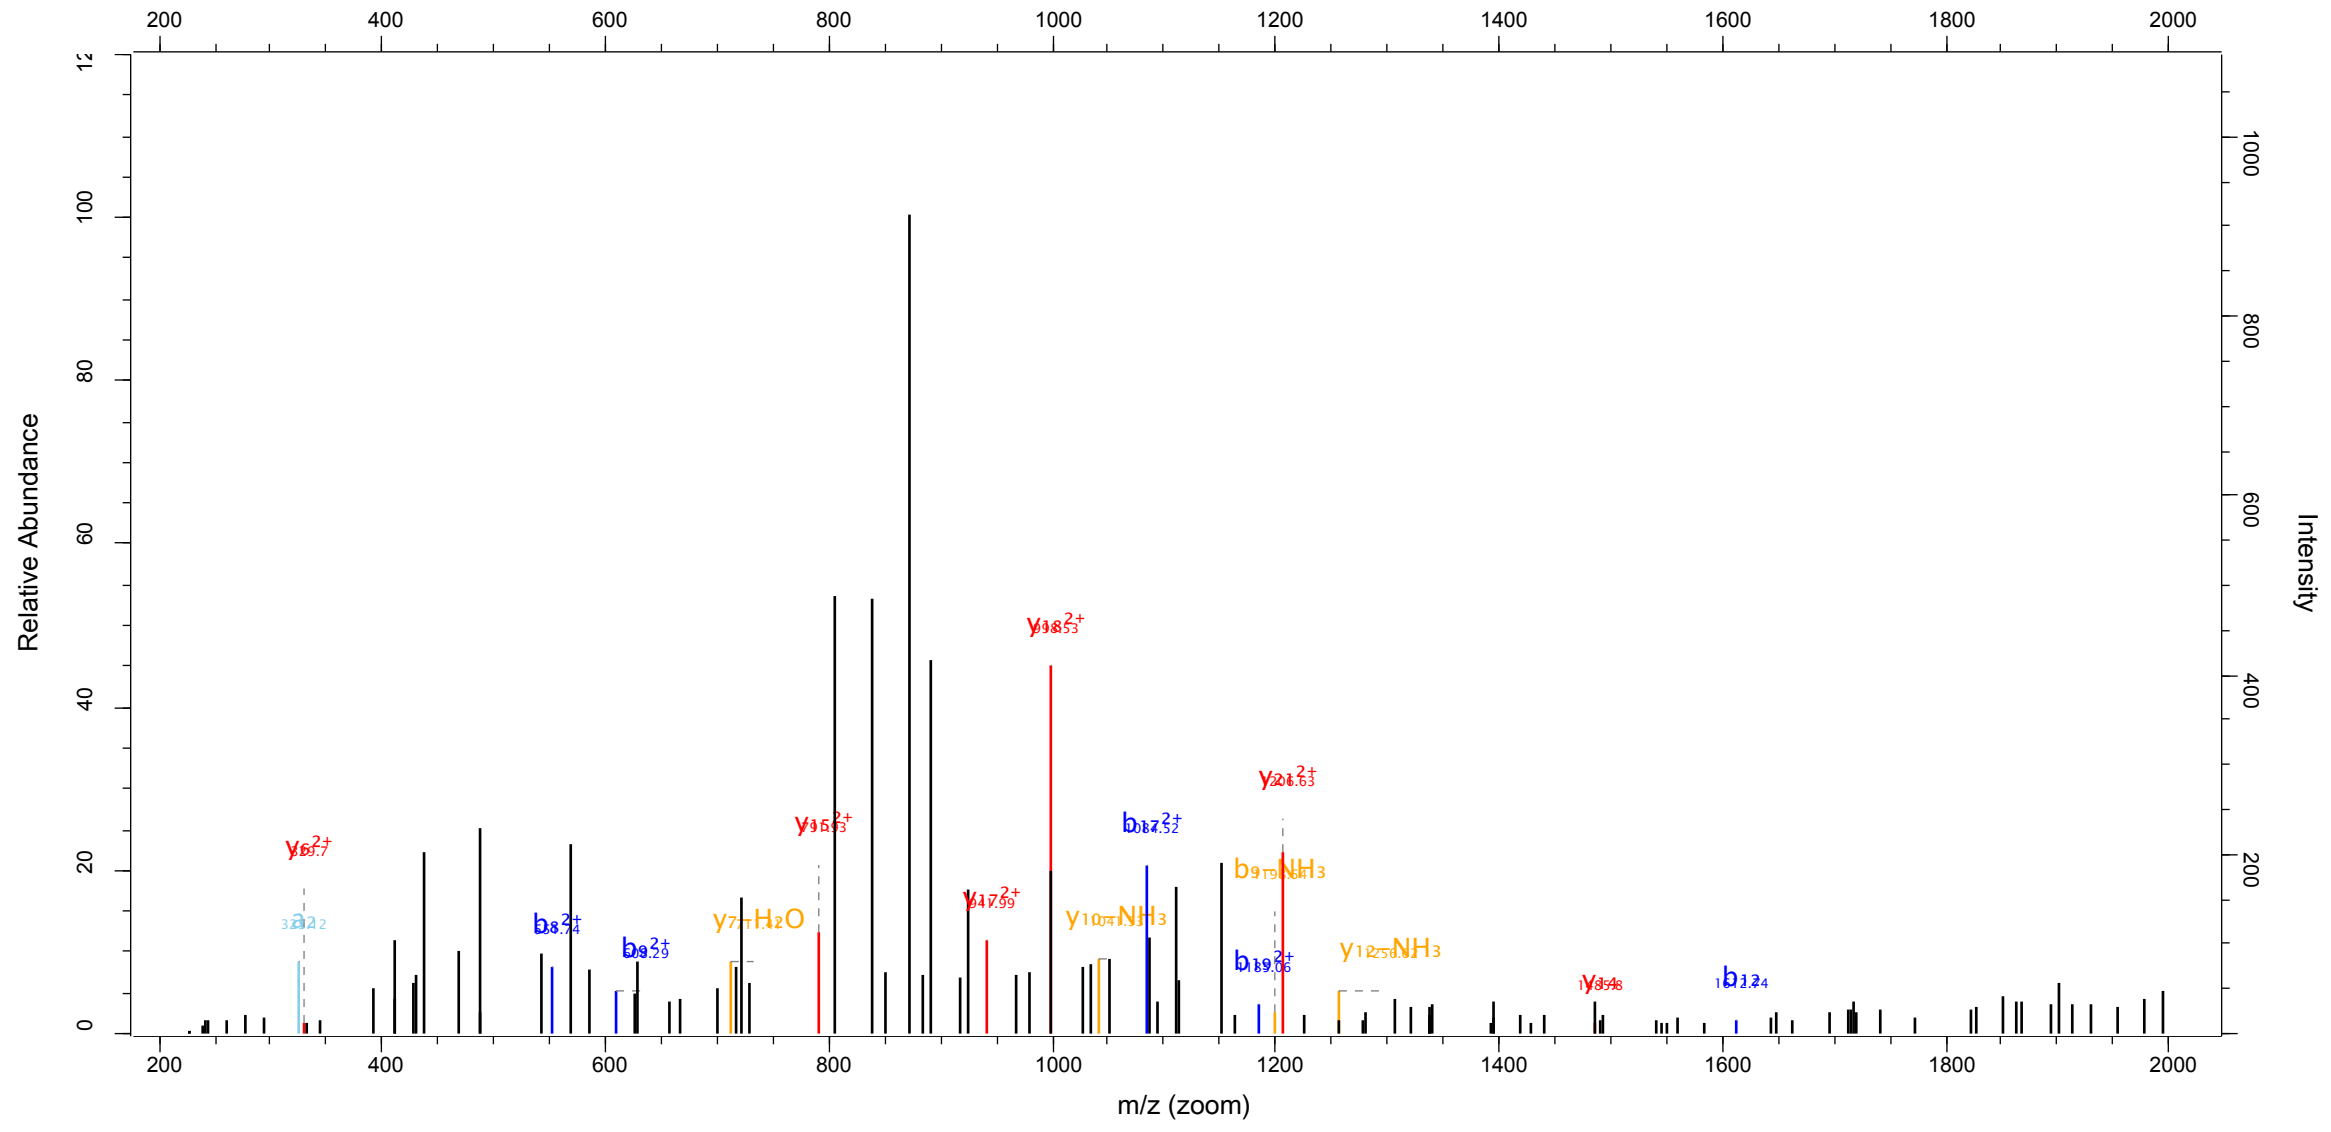

Scan number

28809

Raw file

nak\_ubx4LightSAX5\_11 nov05

Protein Group 1823

Method

ITMS; CID

Pepti...

200.55

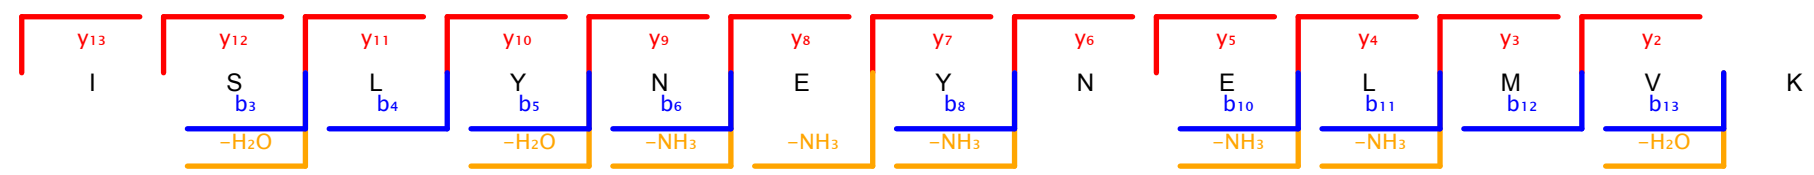

m/z (full)

200 400 600 800 1000 1200 1400 1600

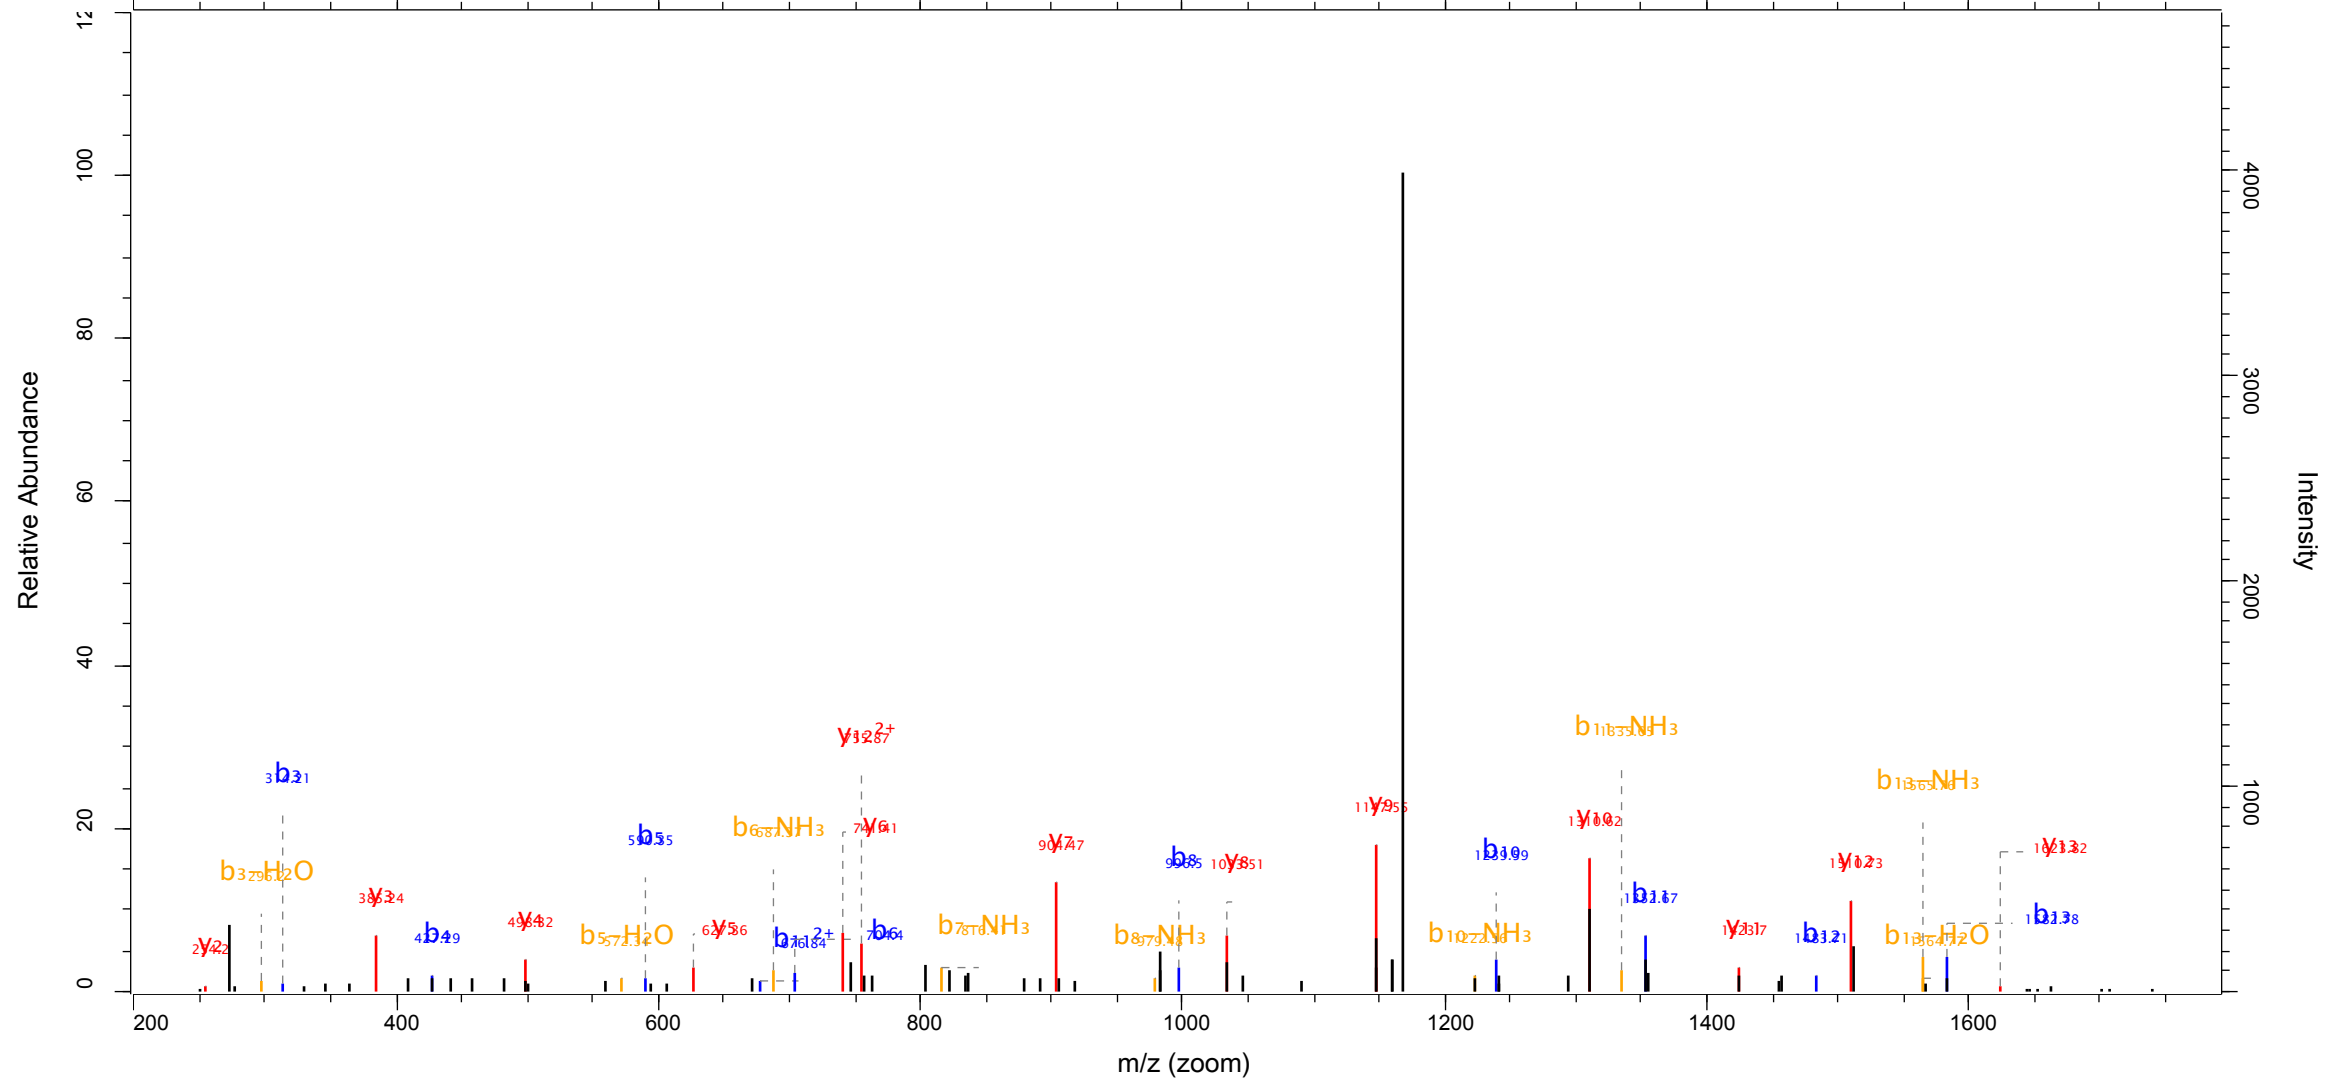



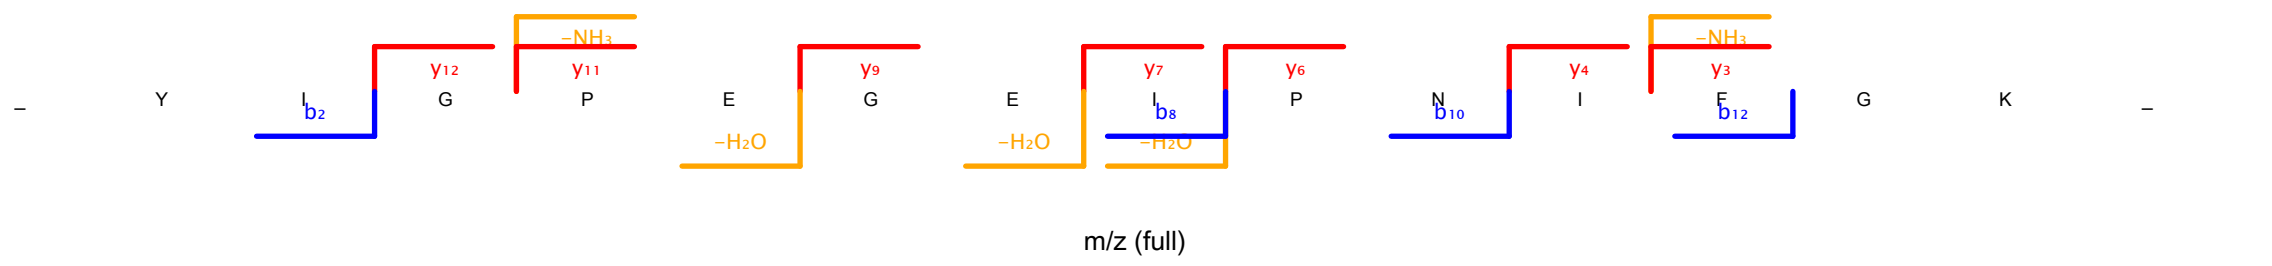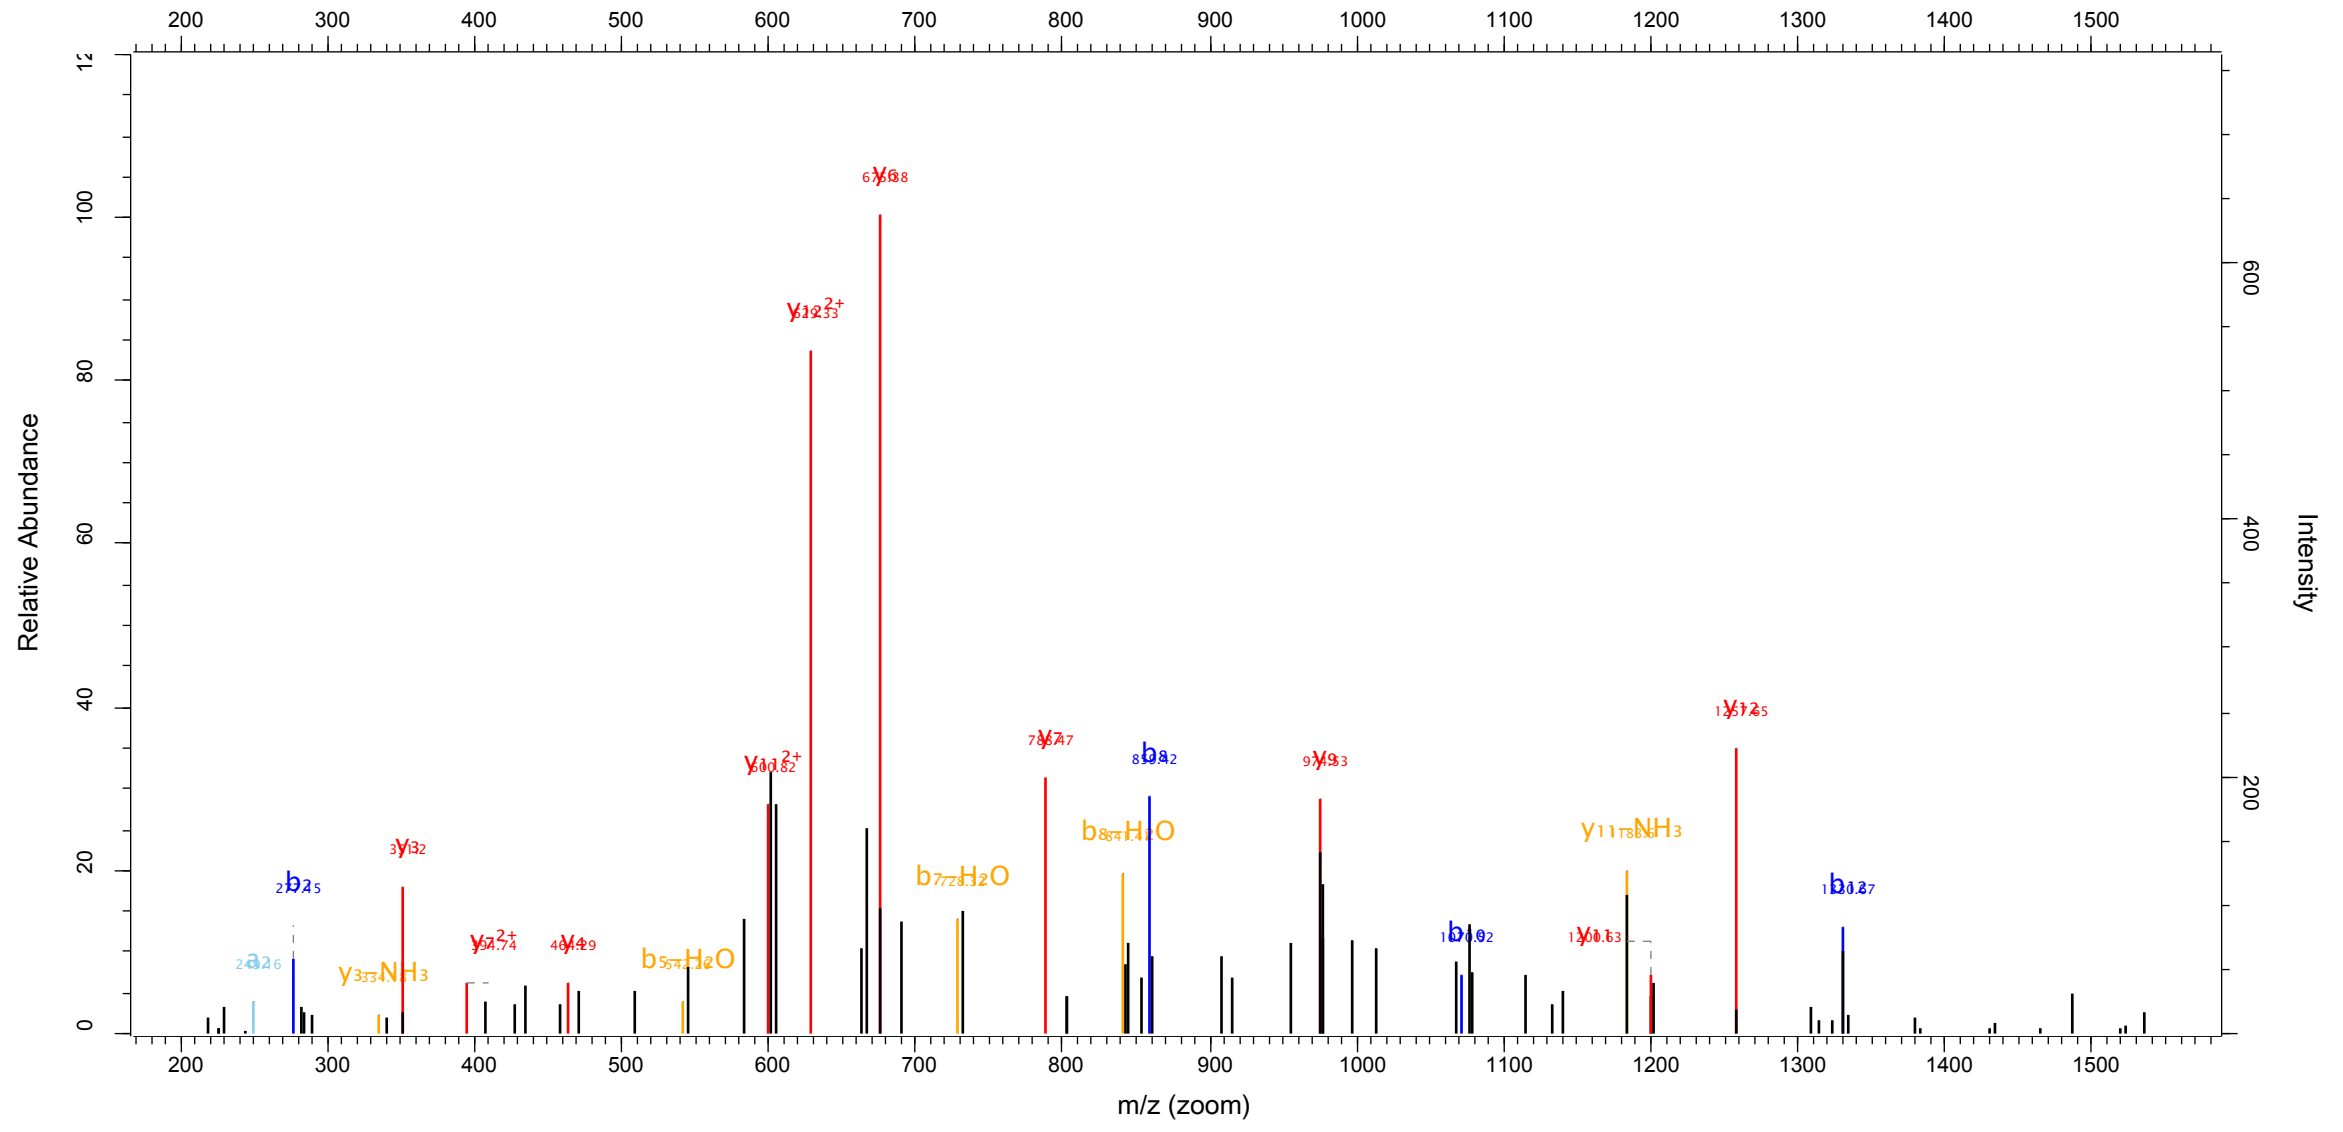

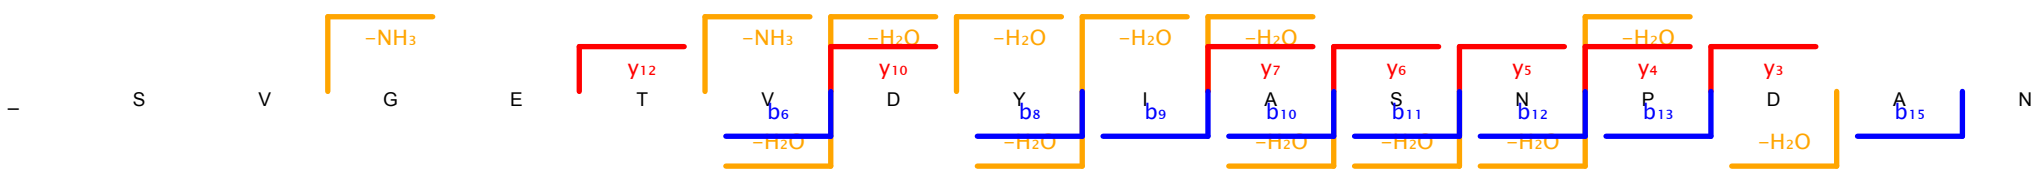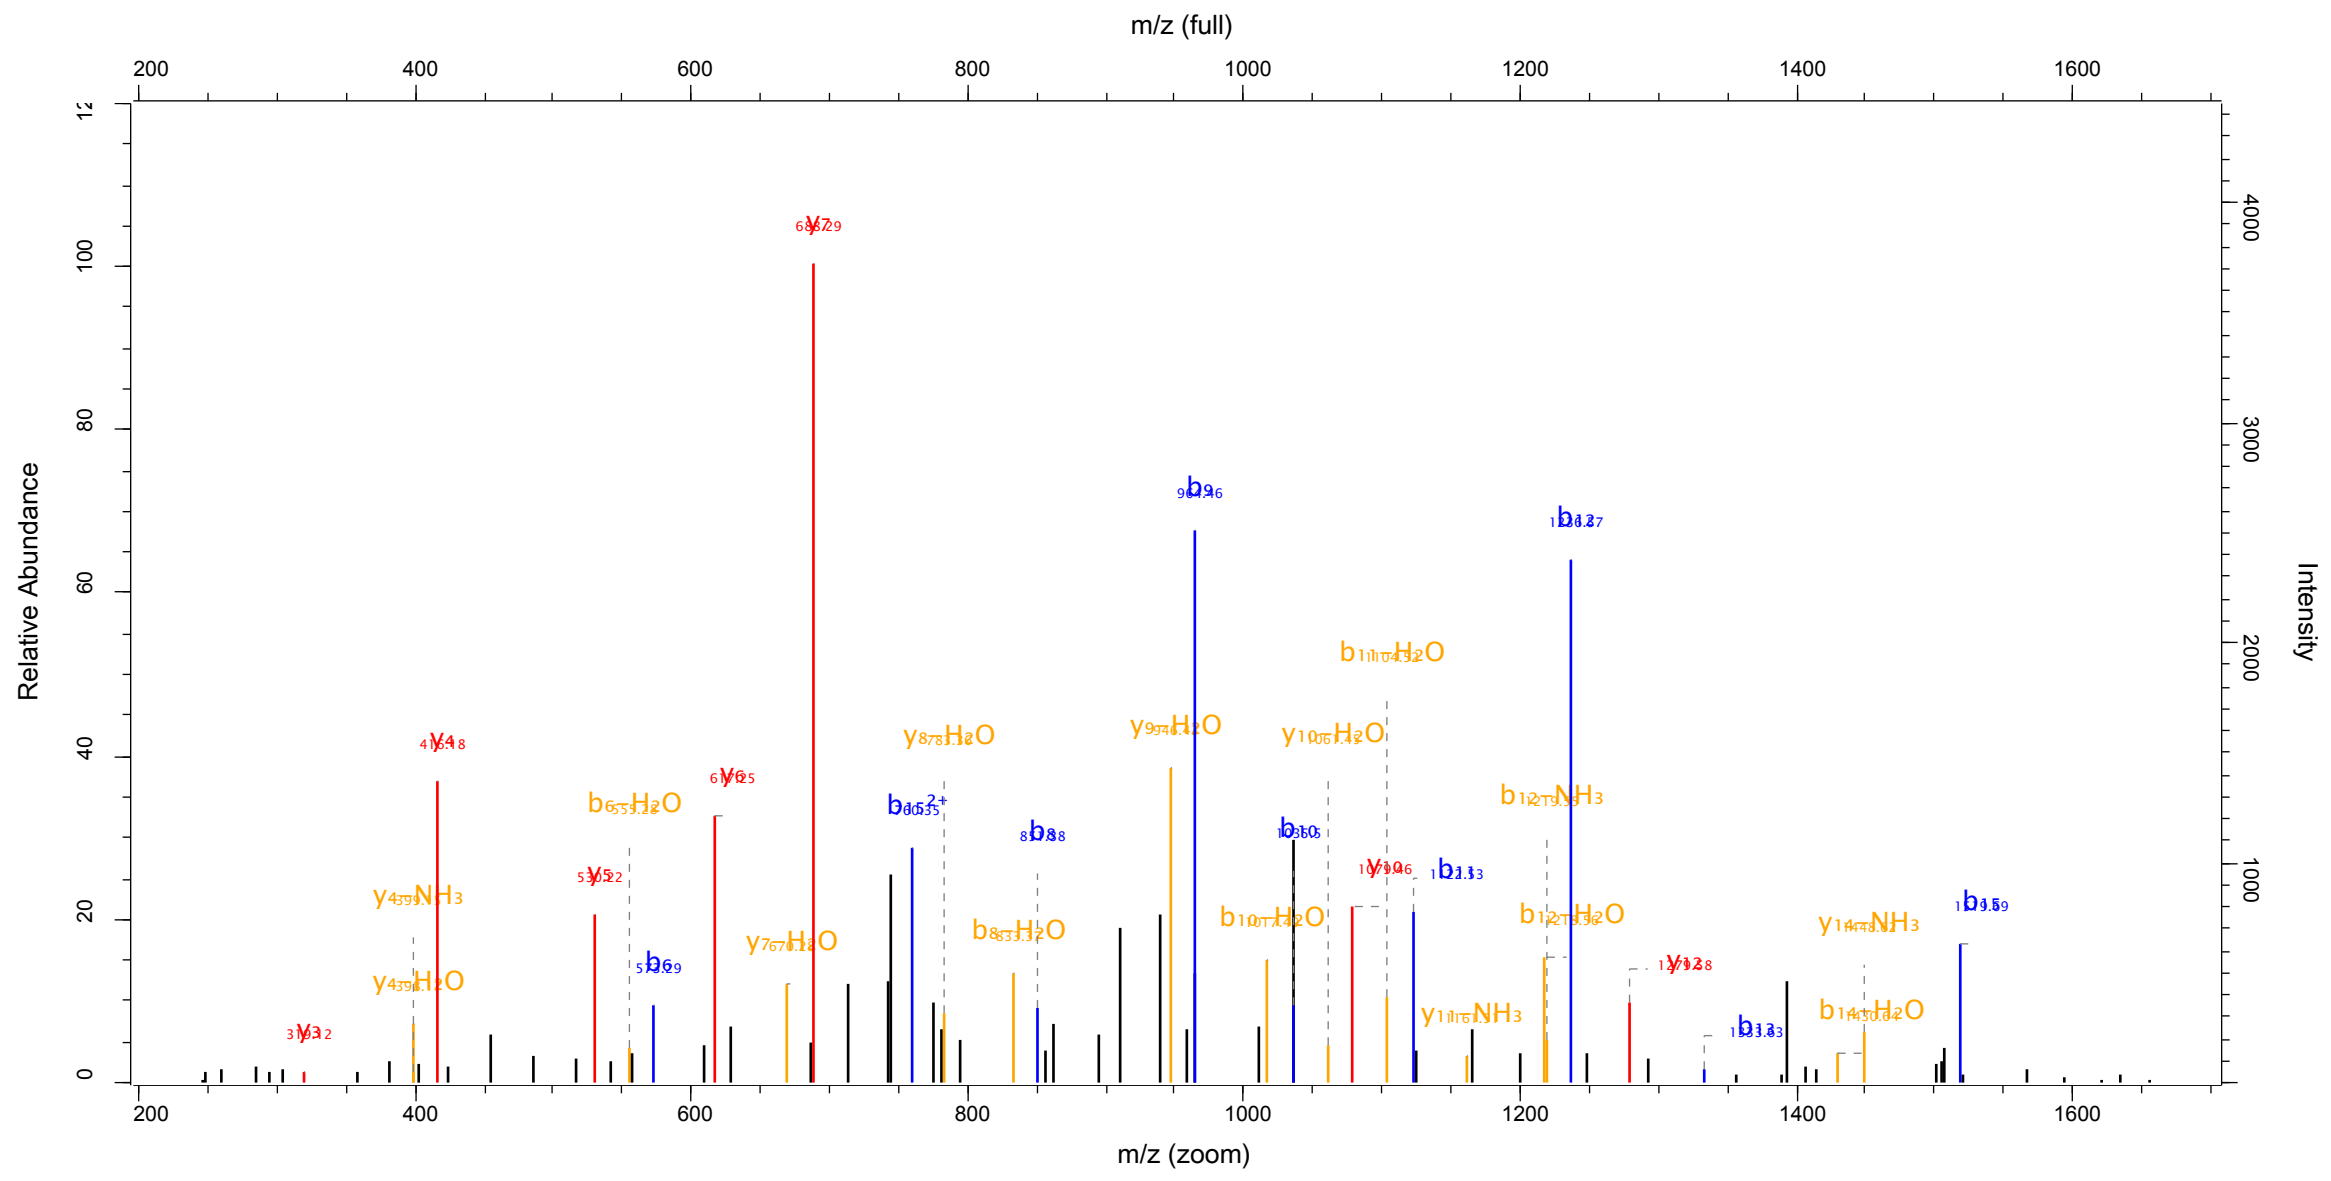

Scan number  
Method

33977  
ITMS; CID

Raw file  
Pepti...

nak\_ubx4LightSAX3\_11 nov03  
87.18

Protein Group 1918

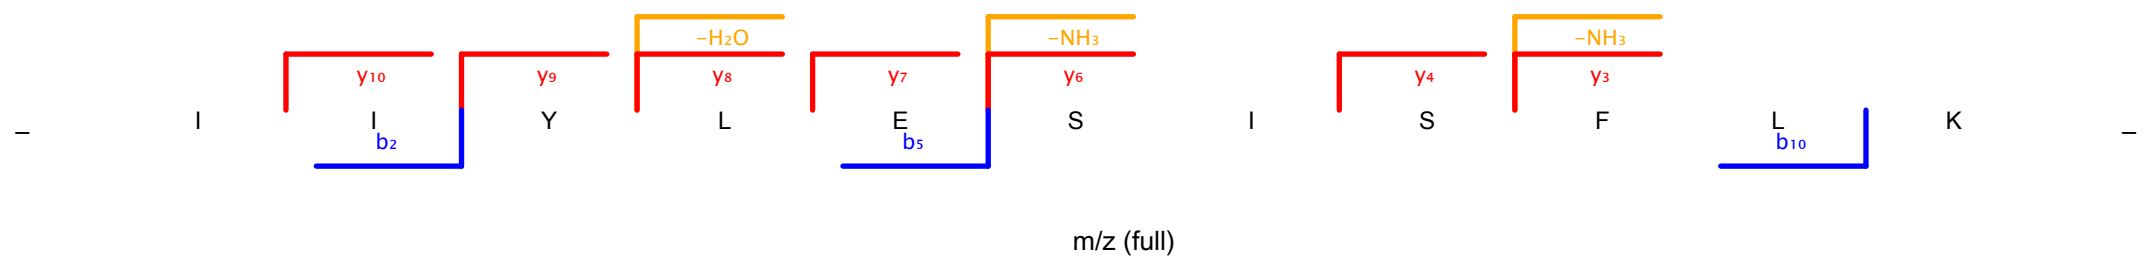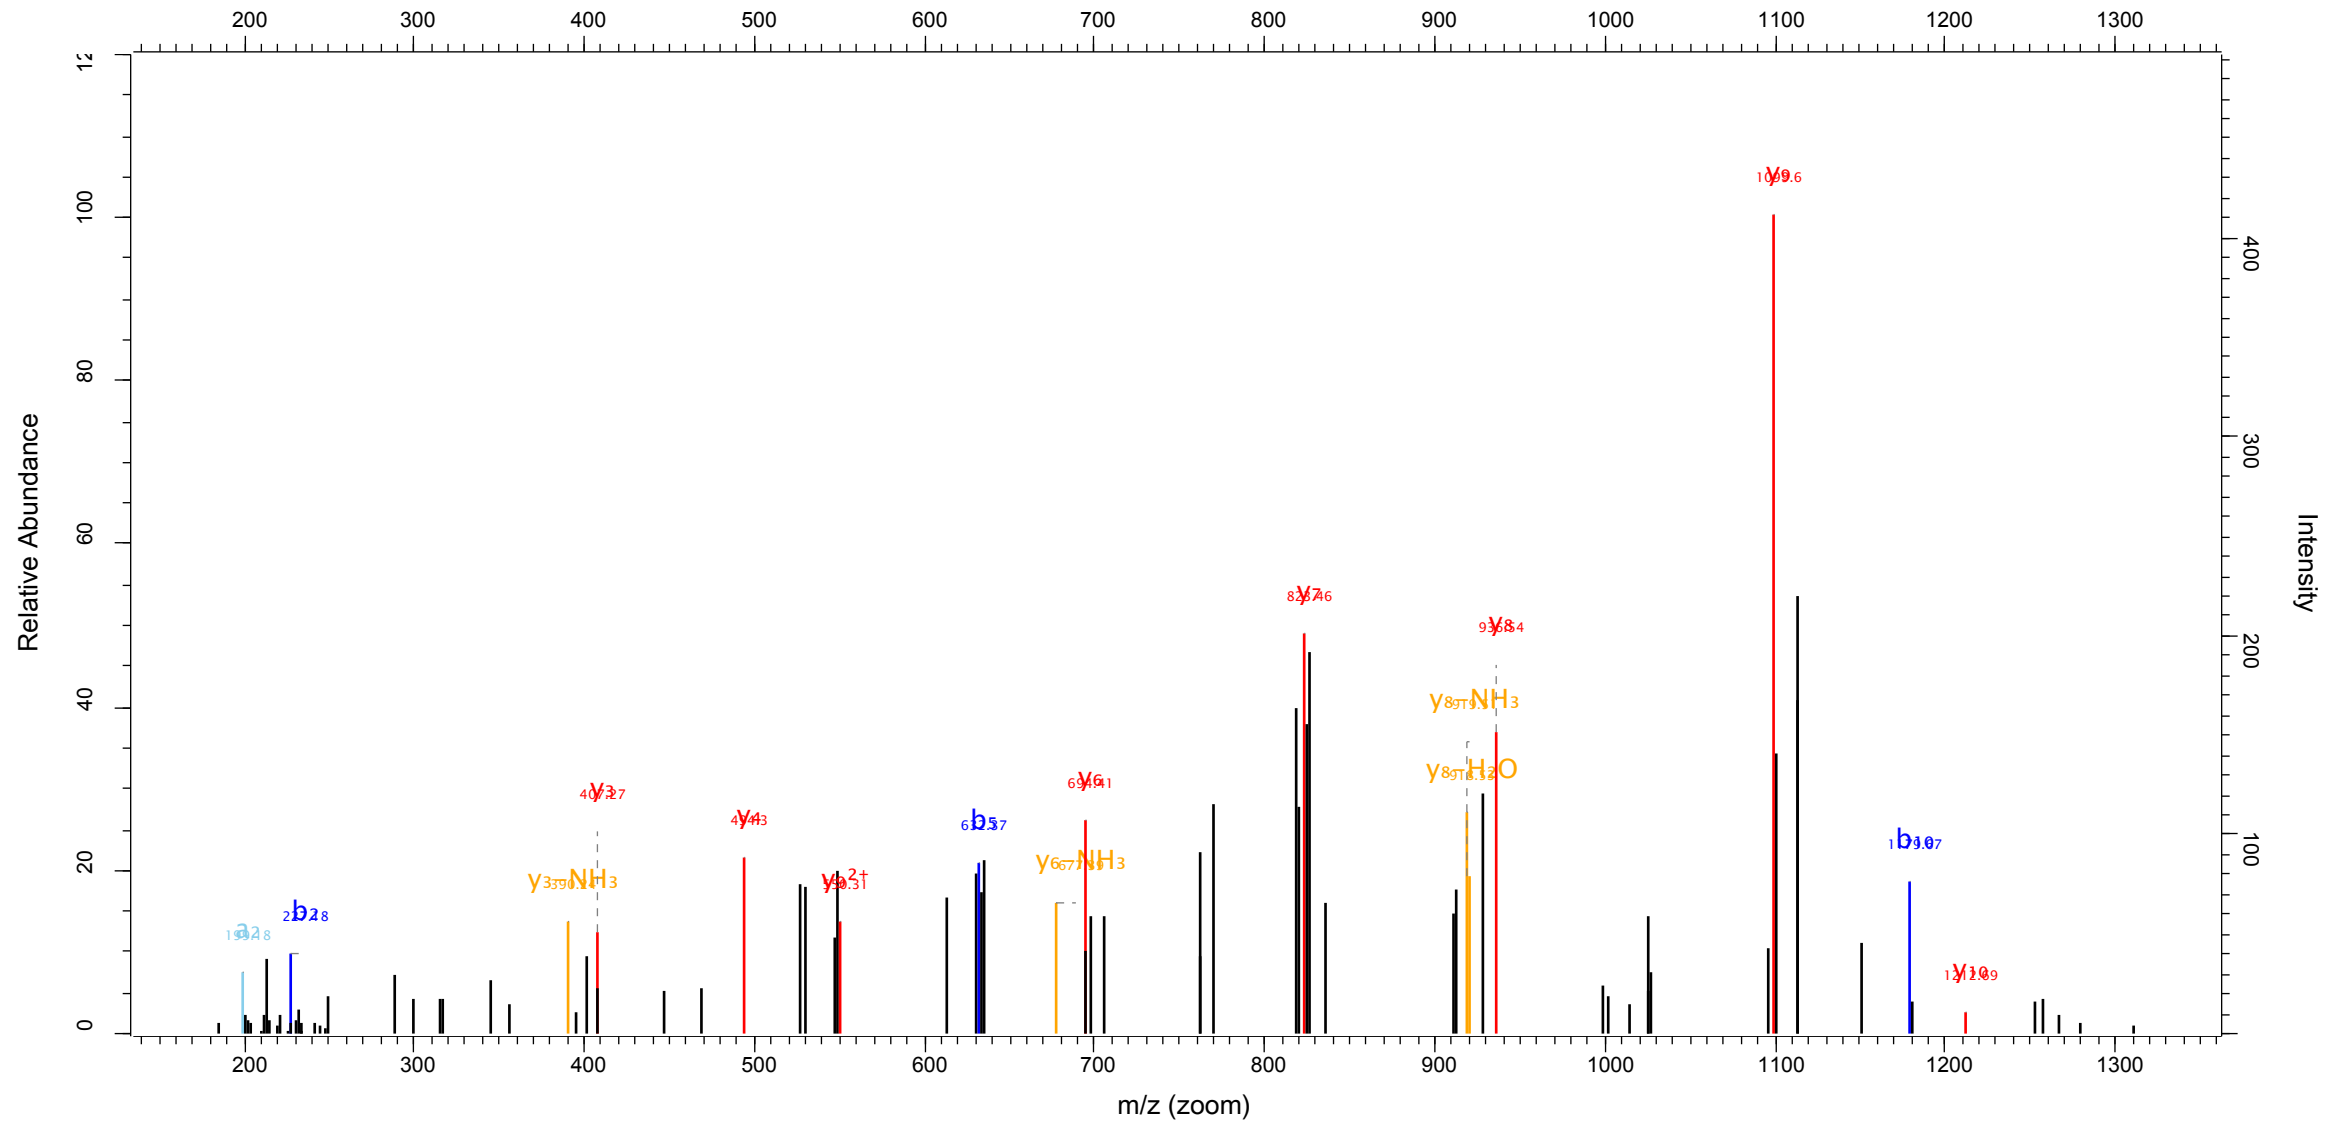

Scan number  
Method

29508  
ITMS; CID

Raw file  
Pepti...

nak\_cdc48UbconjugatesSAX6\_22may10\_7  
136.27

Protein Group 1923

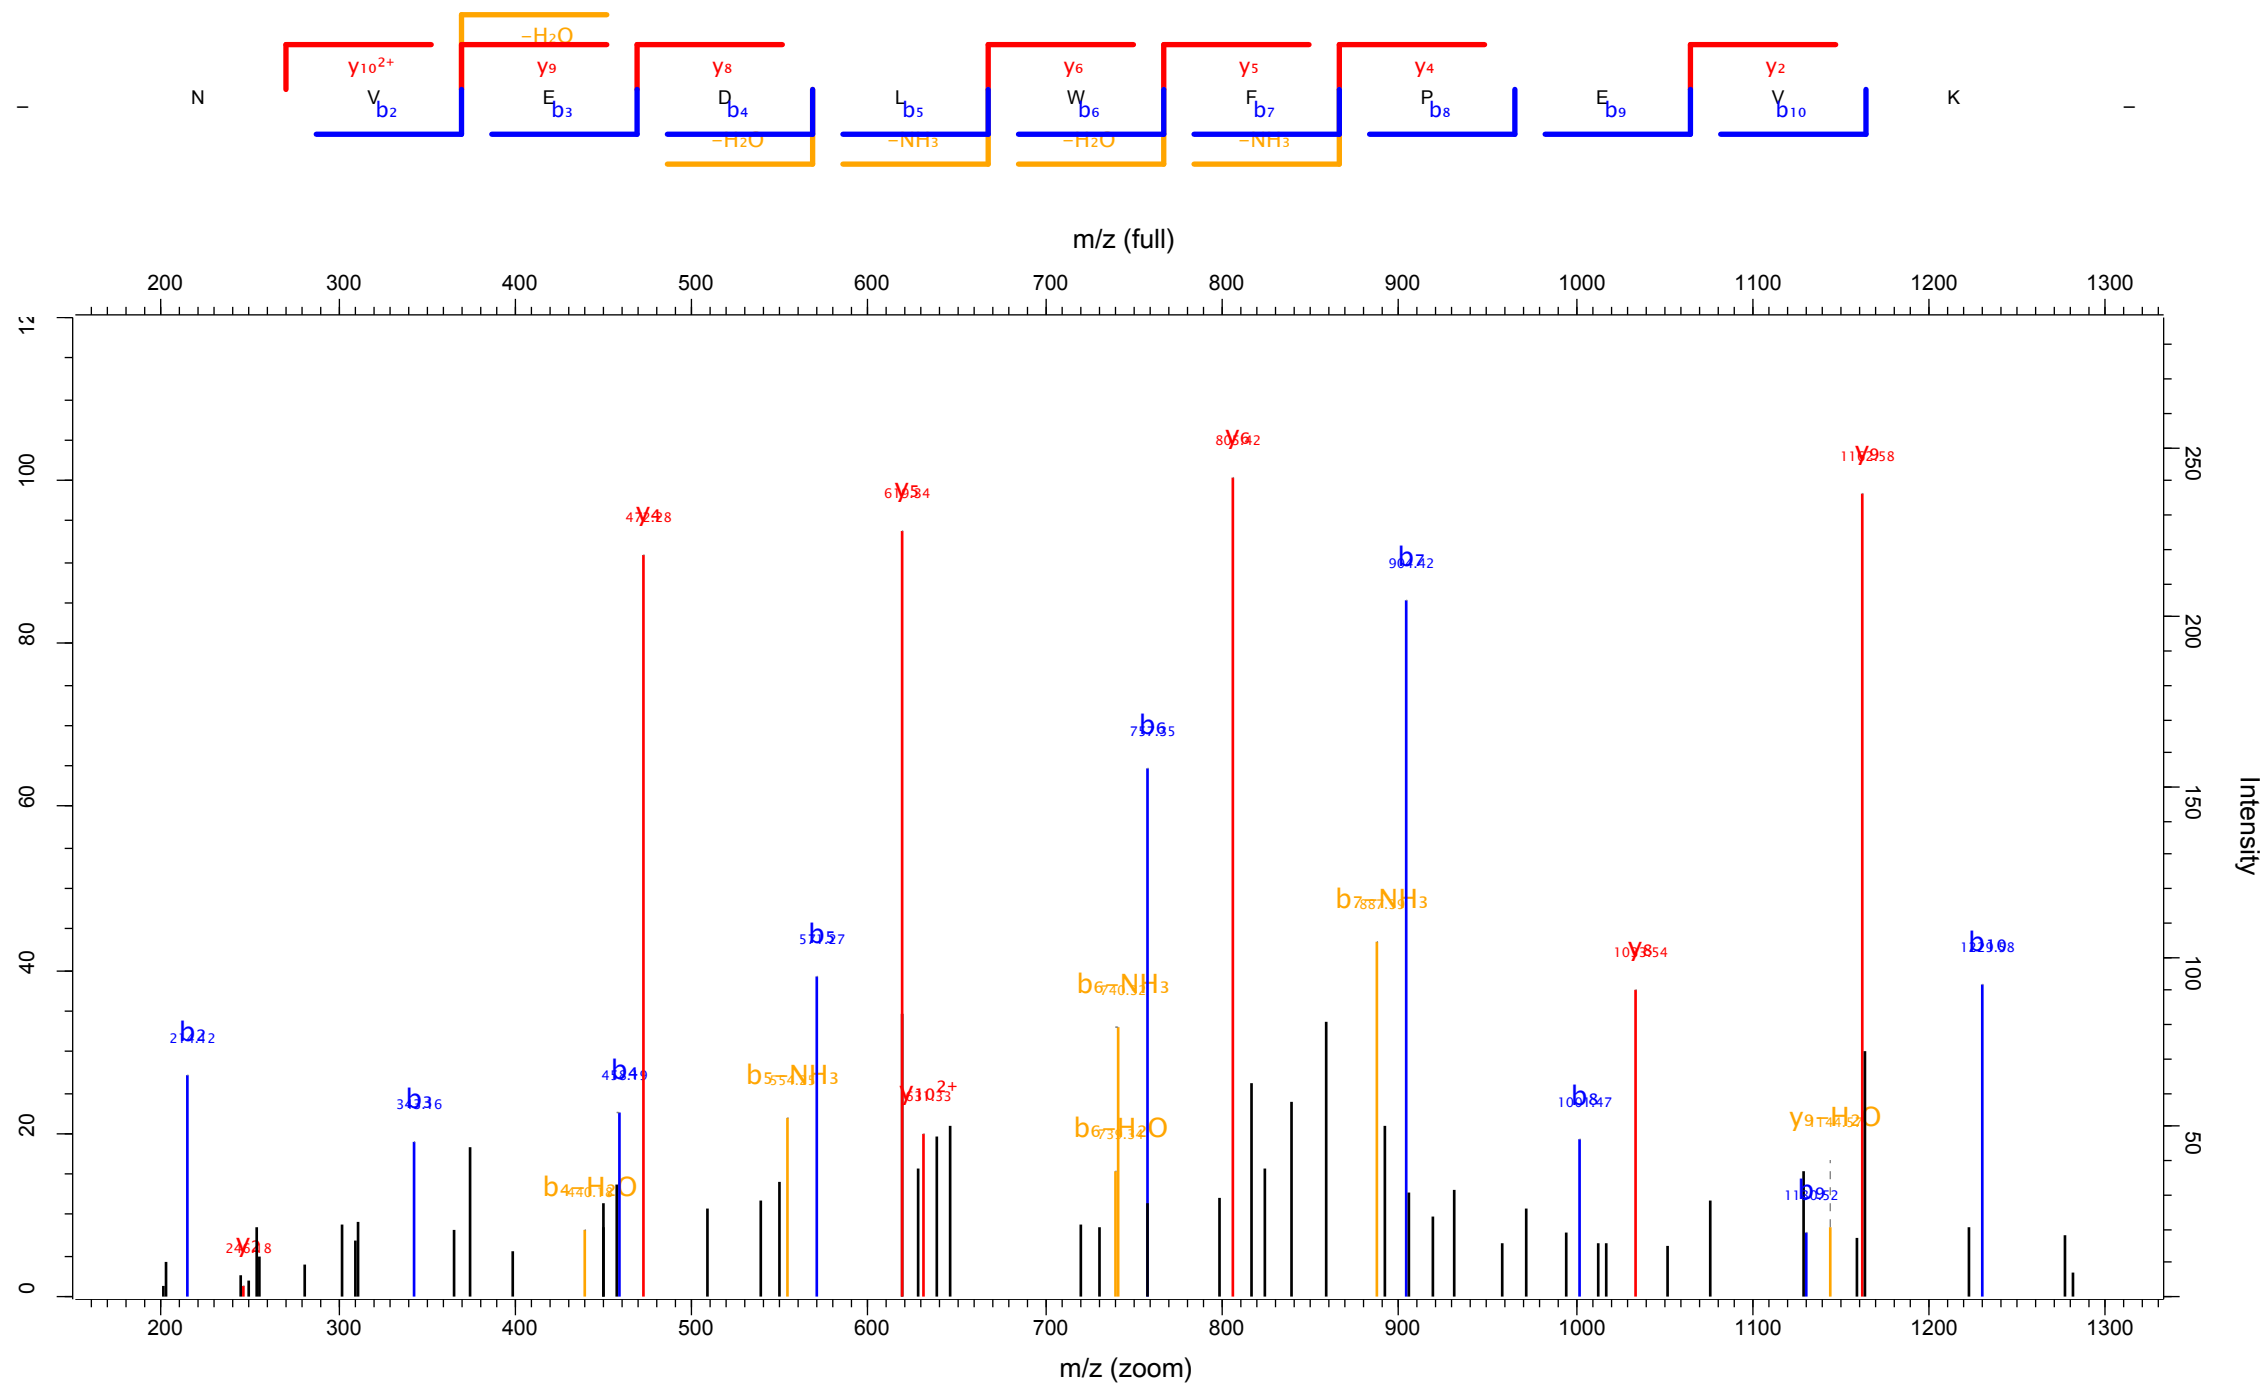

Scan number 18380 Raw file nak\_cdc48UbconjugatesSAX6\_14may10\_10  
 Method ITMS; CID Pepti... 198.77

Protein Group 1927

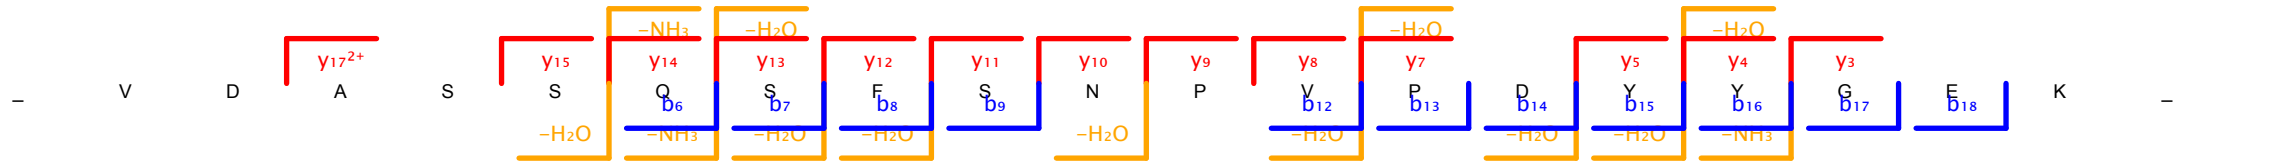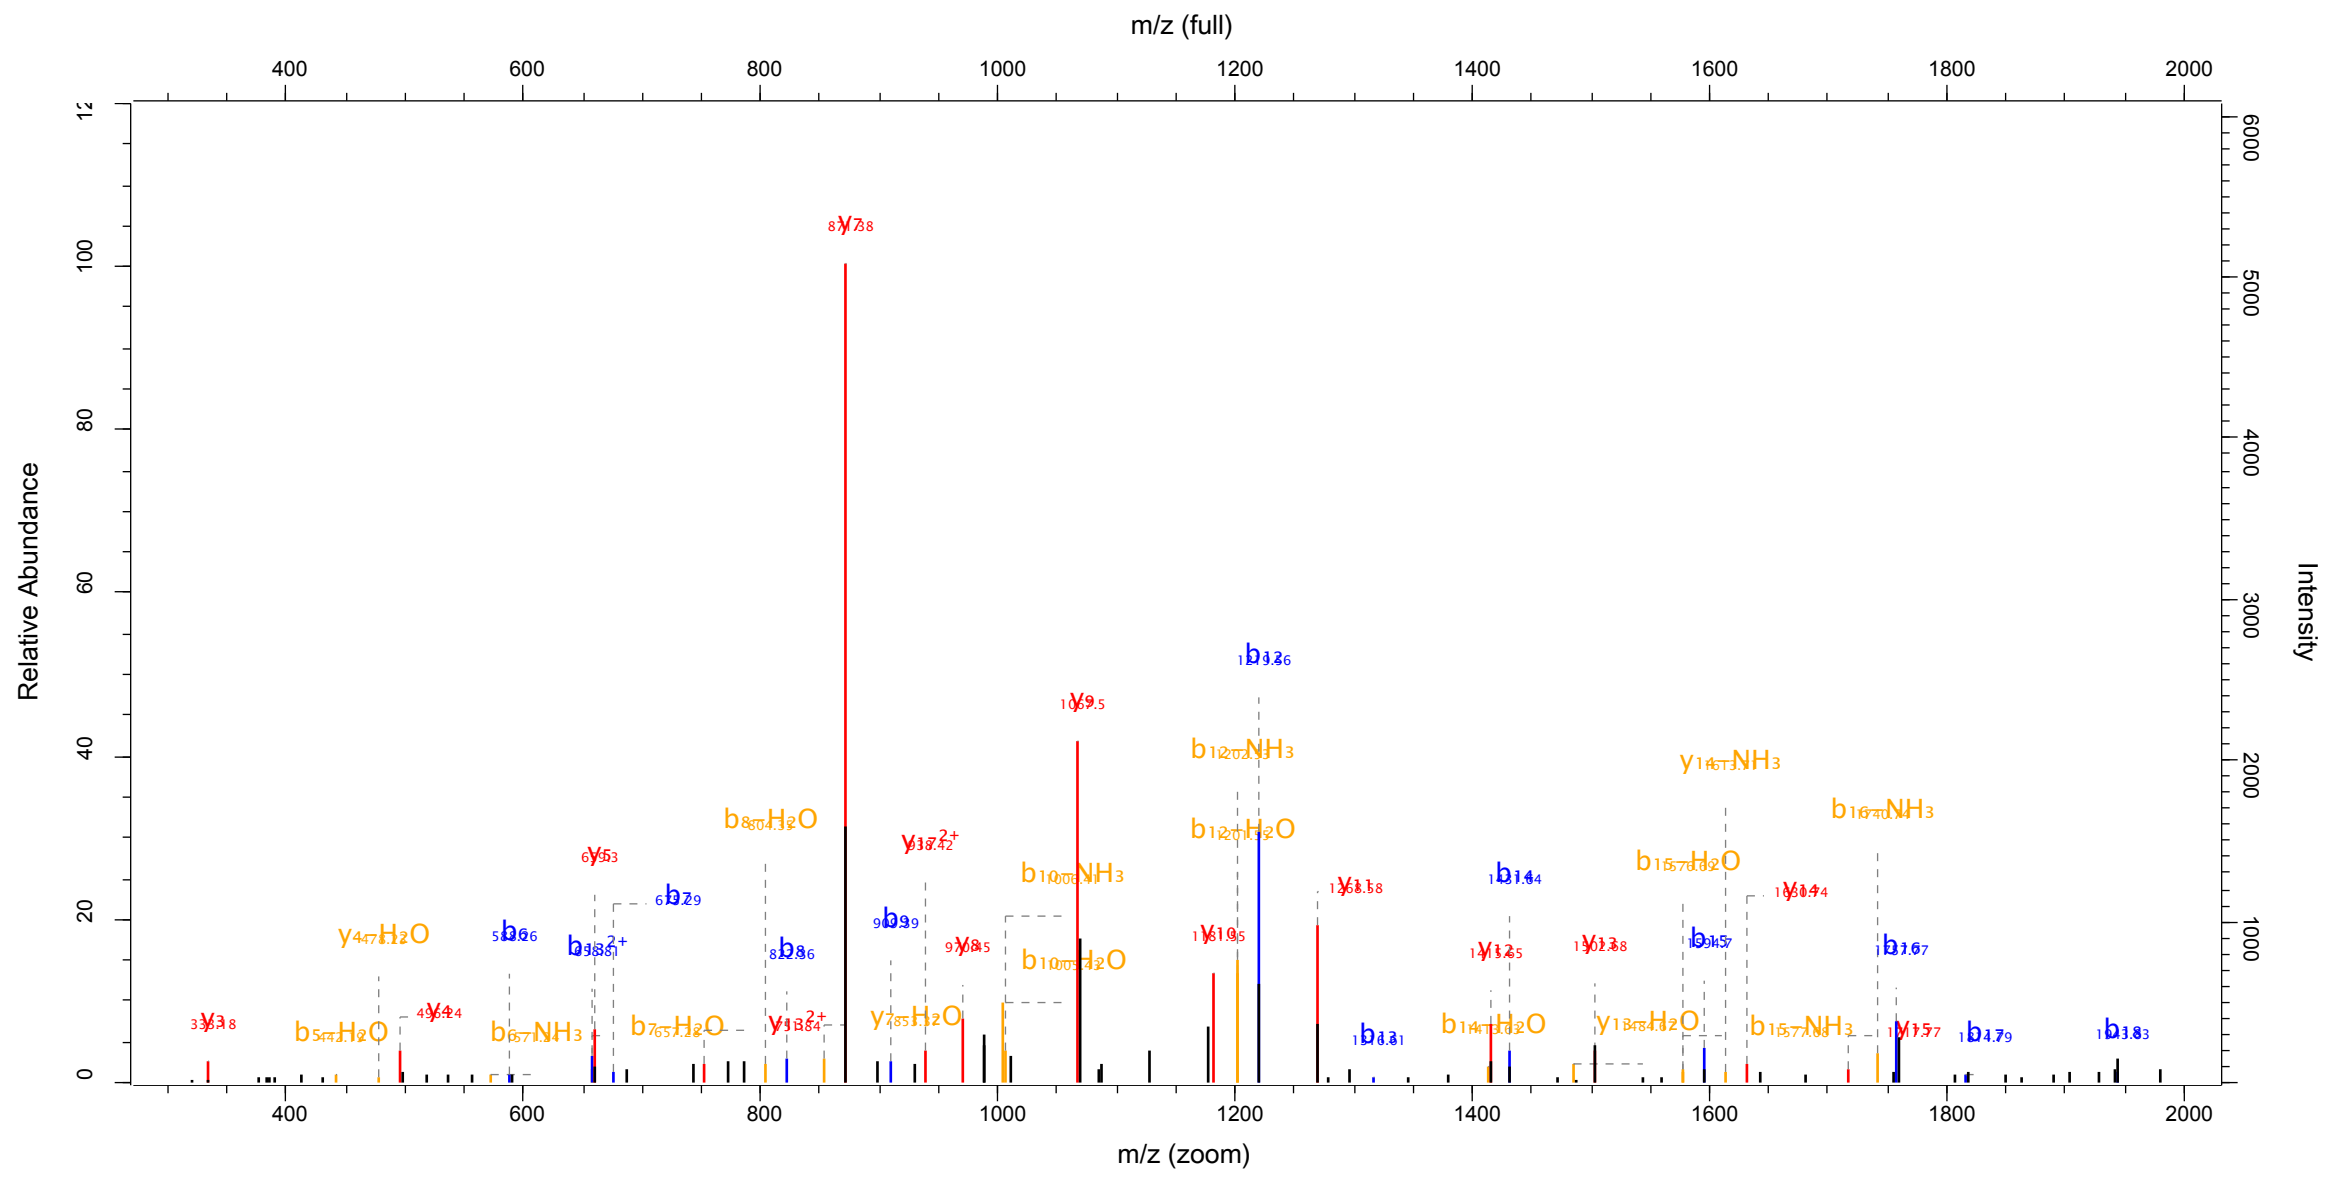

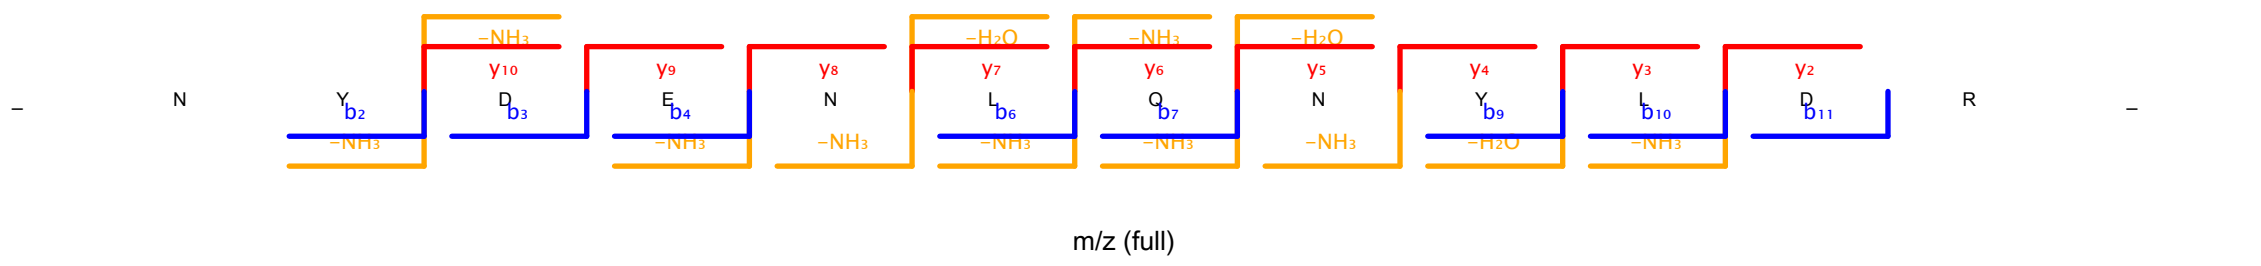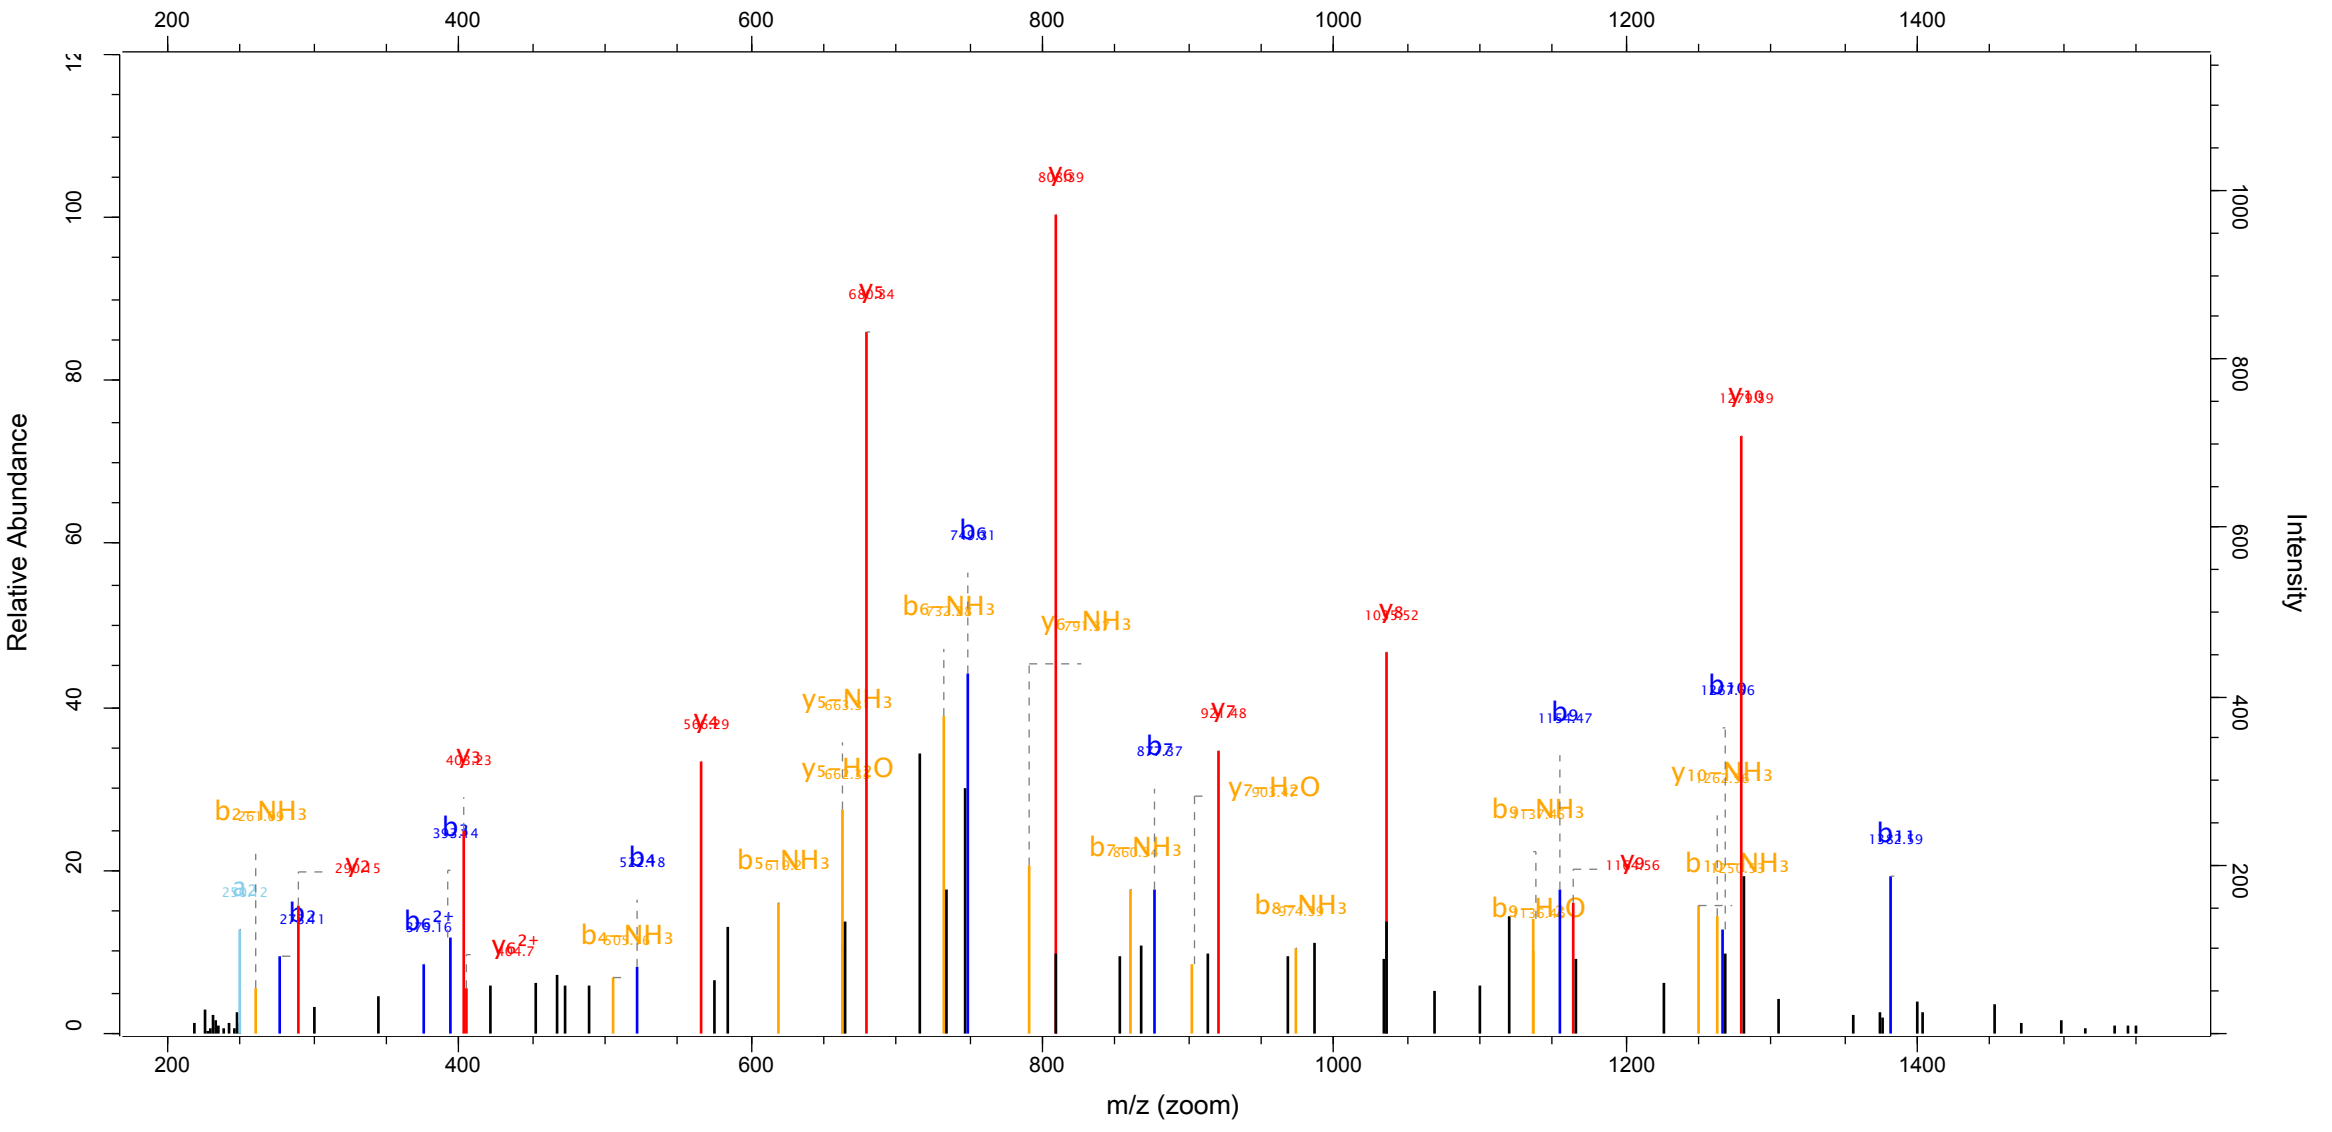

Scan number  
Method

34160  
ITMS; CID

Raw file  
Pepti...

nak\_ubx4LightSAX3\_11 nov03  
112.13

Protein Group 1985

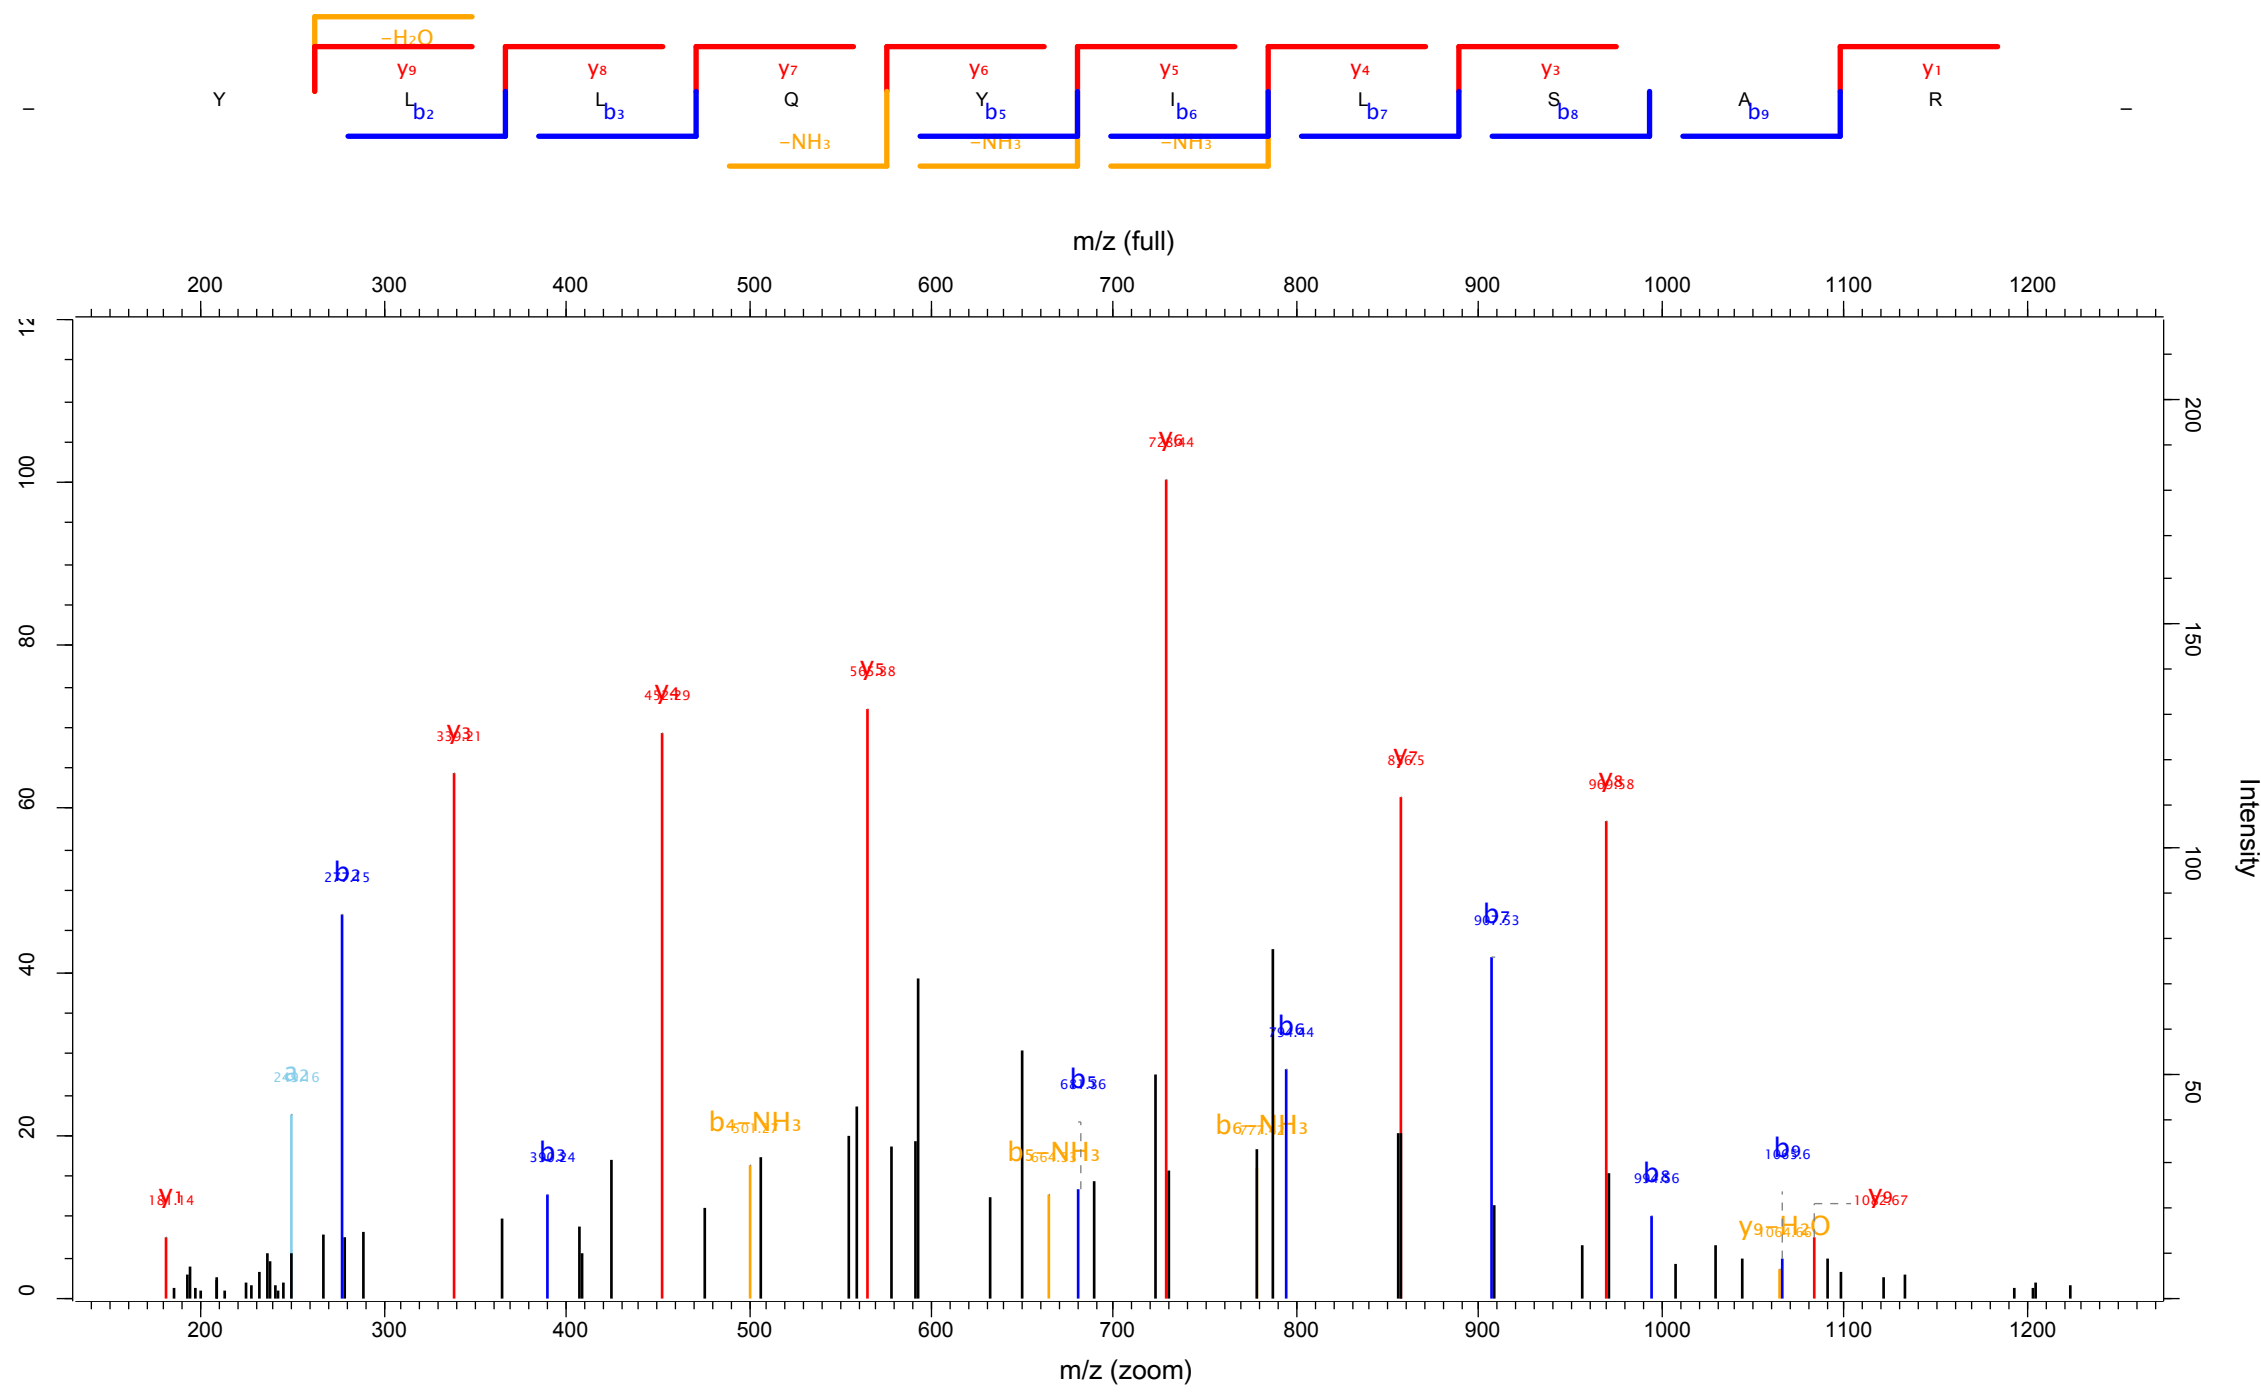

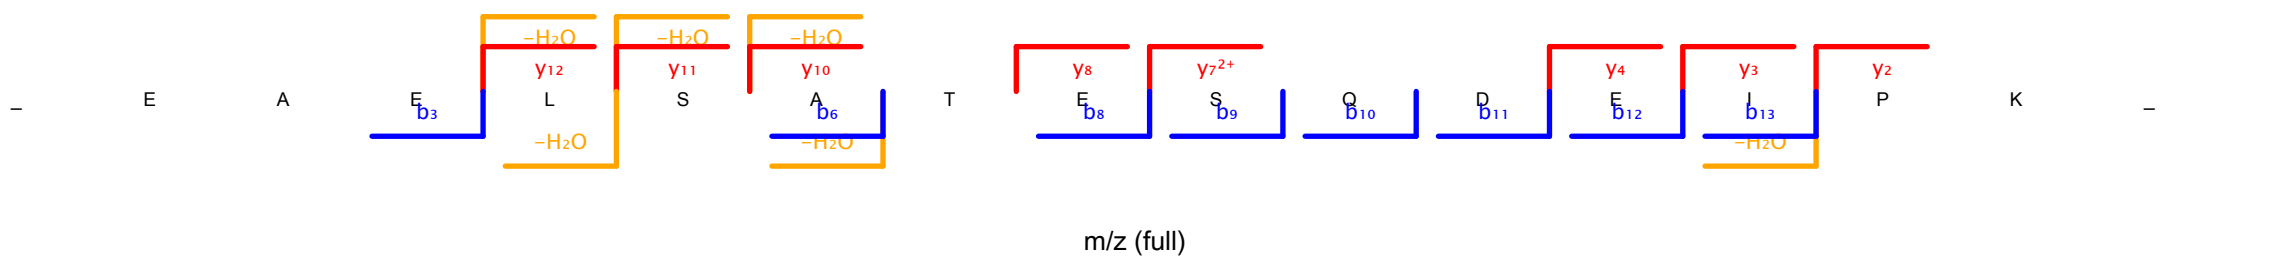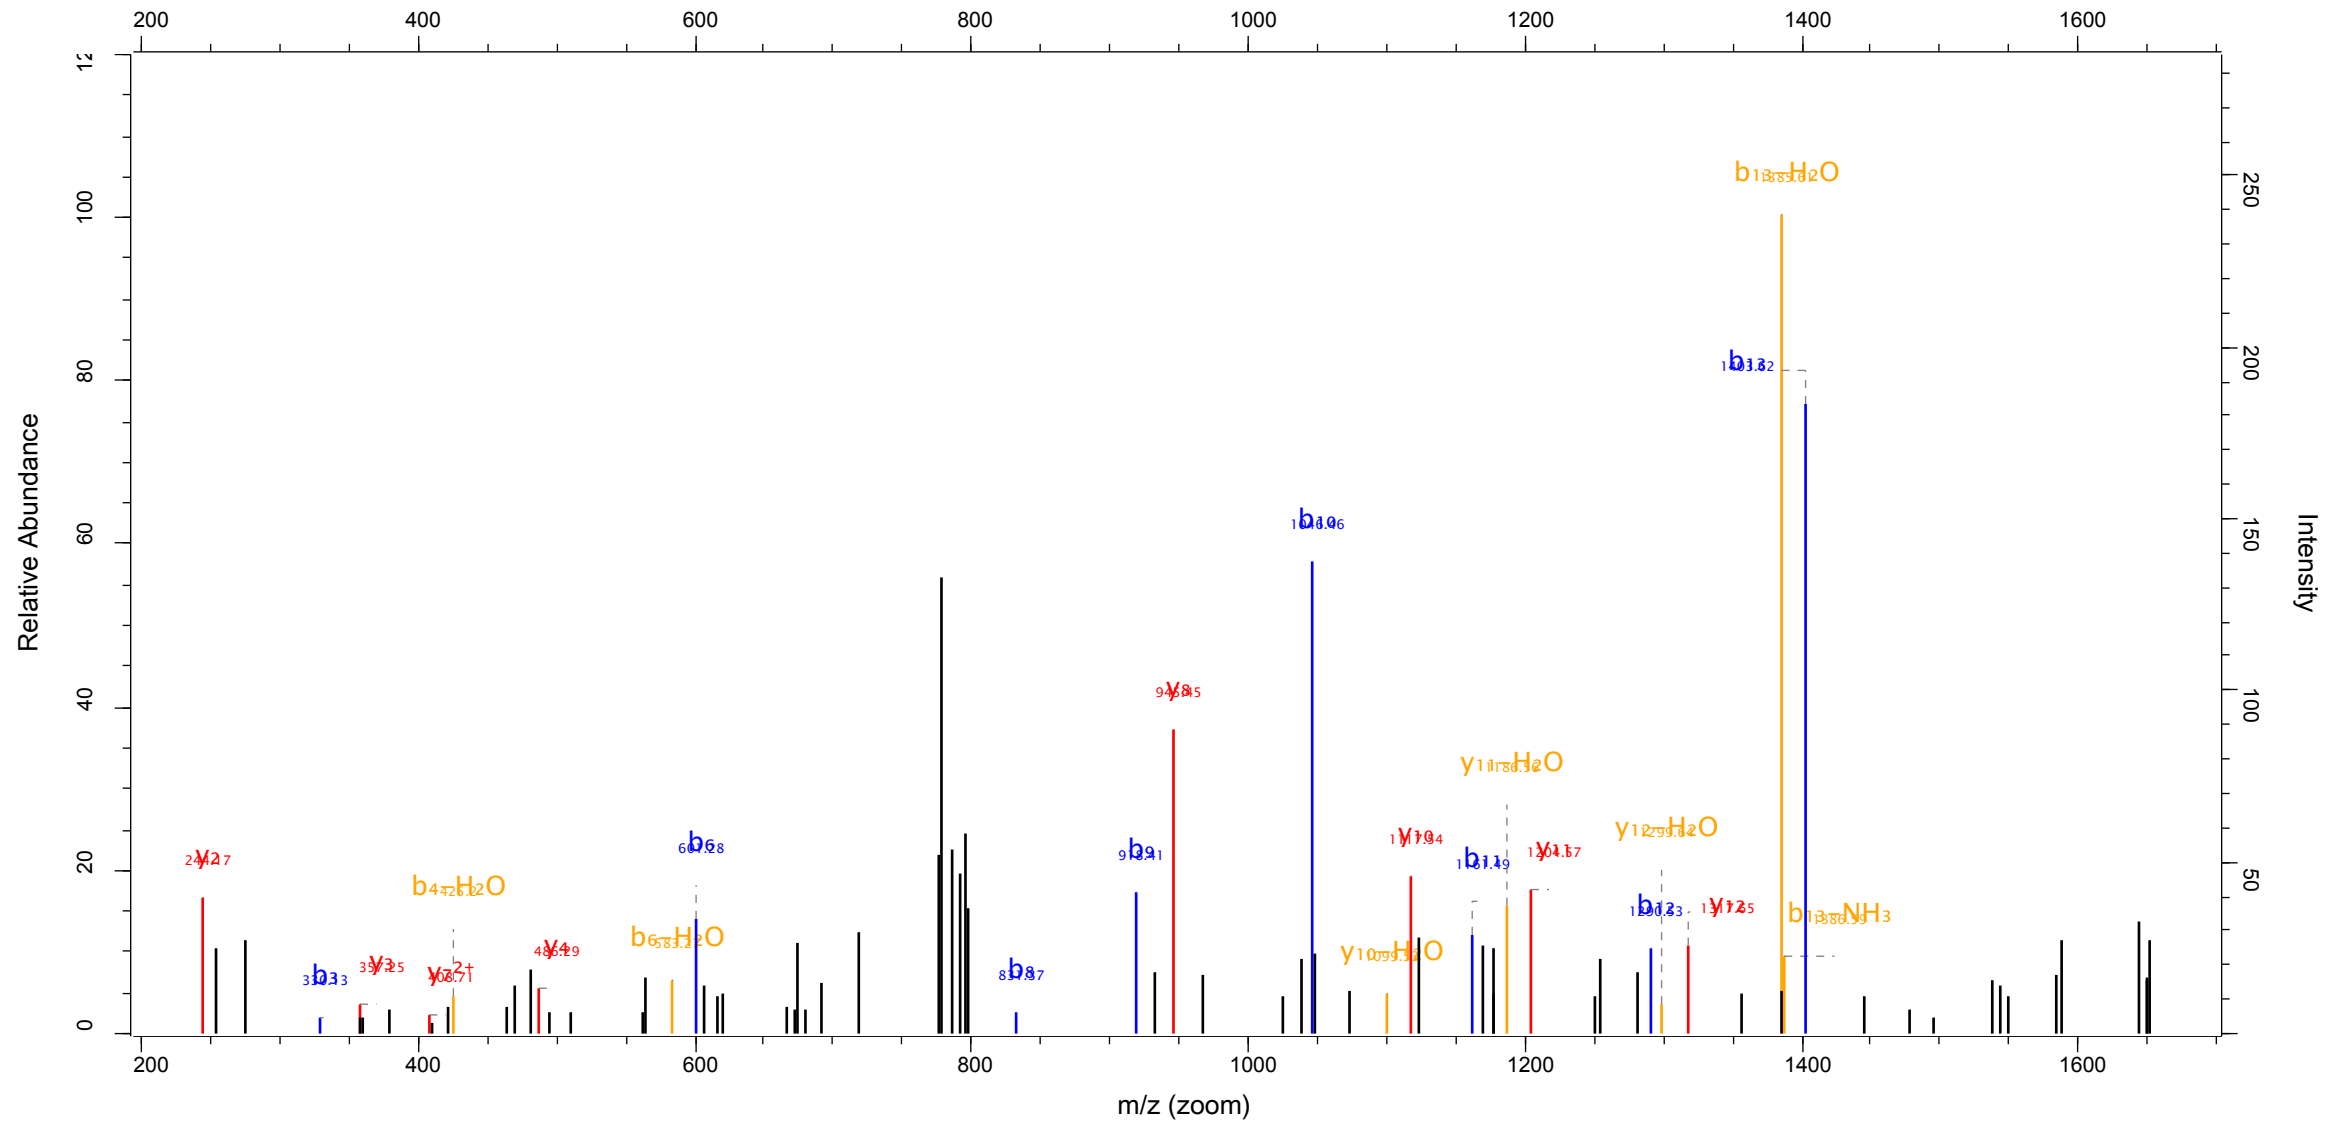



Scan number  
Method

19205  
ITMS; CID

Raw file  
Pepti...

nak\_cdc48UbconjugatecontrolSAX1\_21may20  
225.09

Protein Group 2018

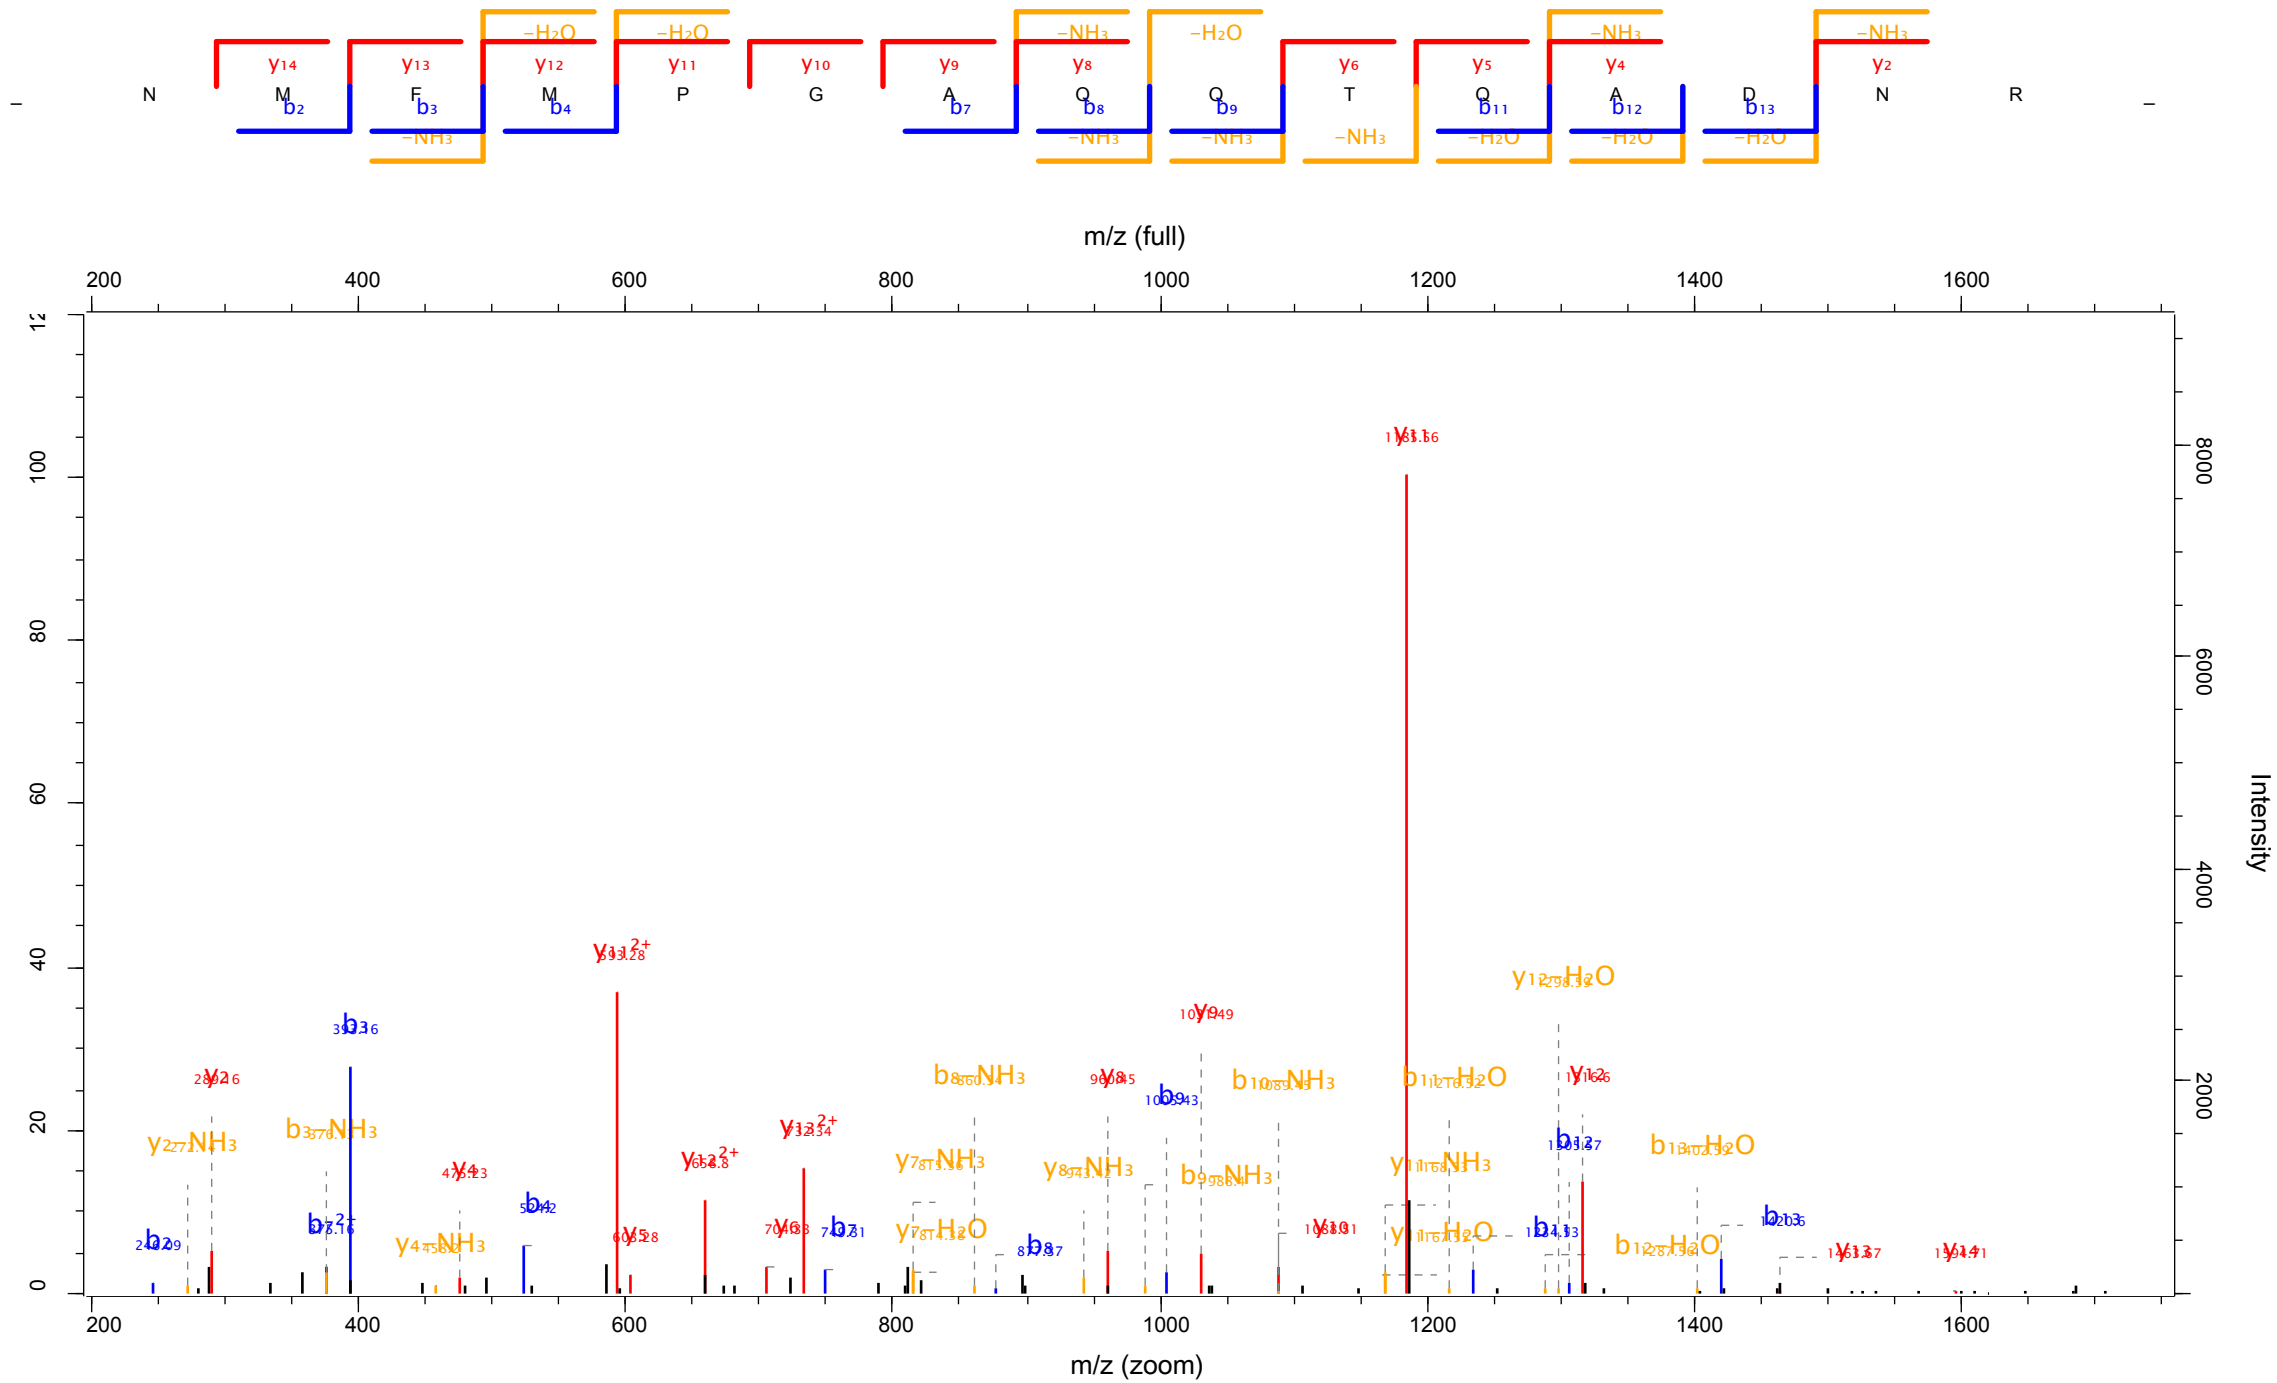

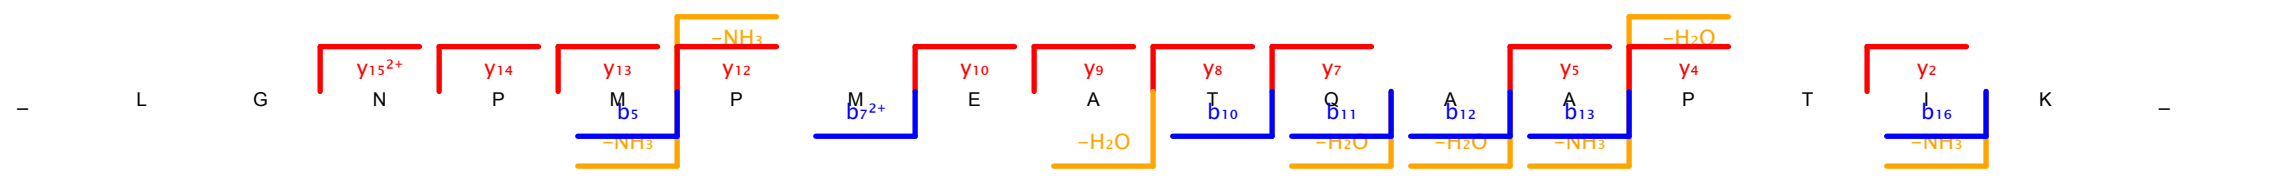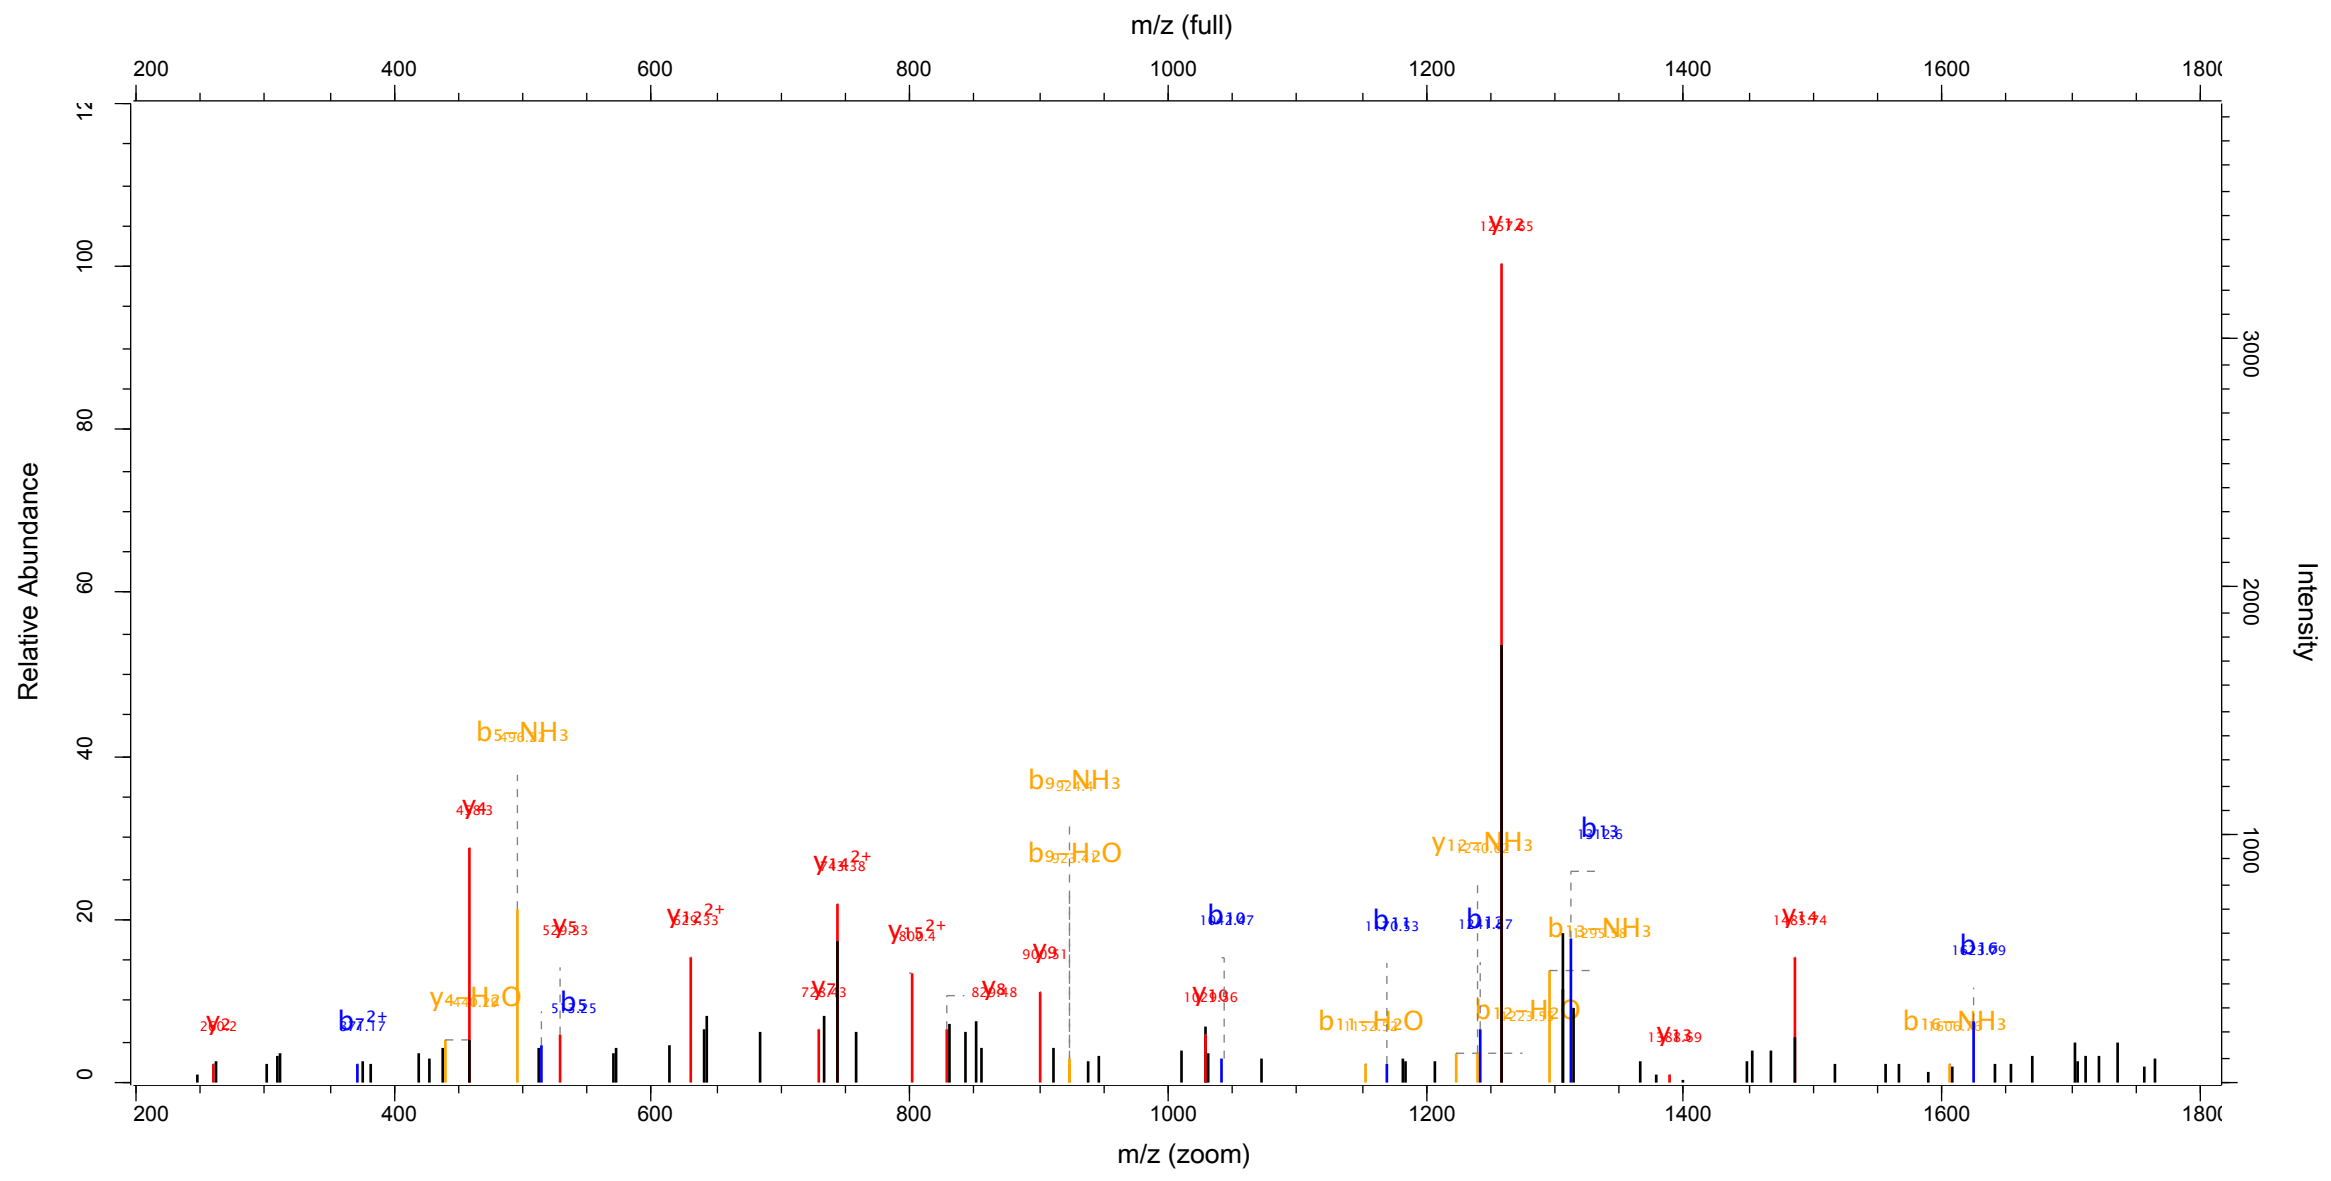

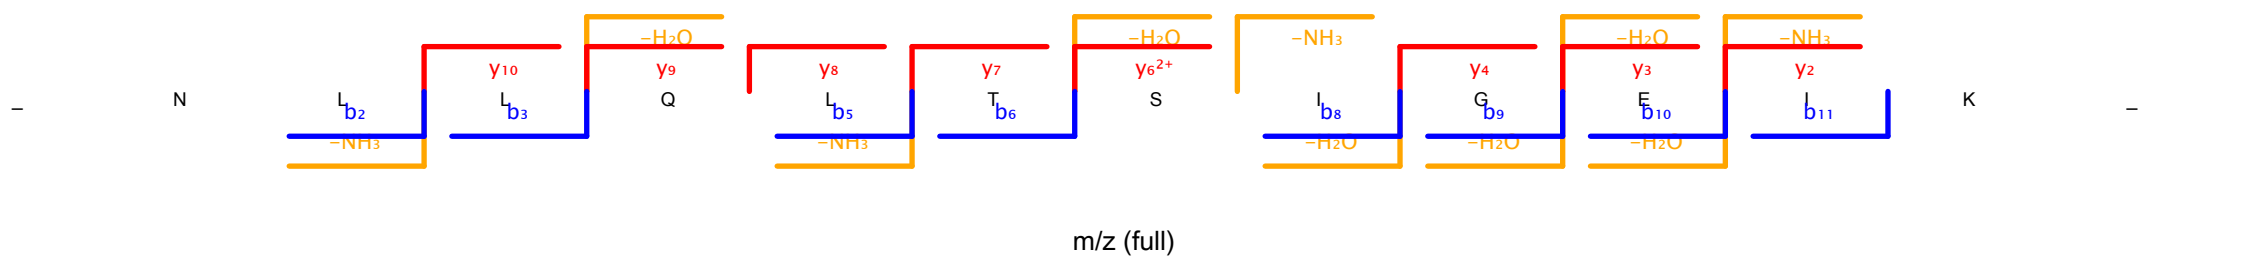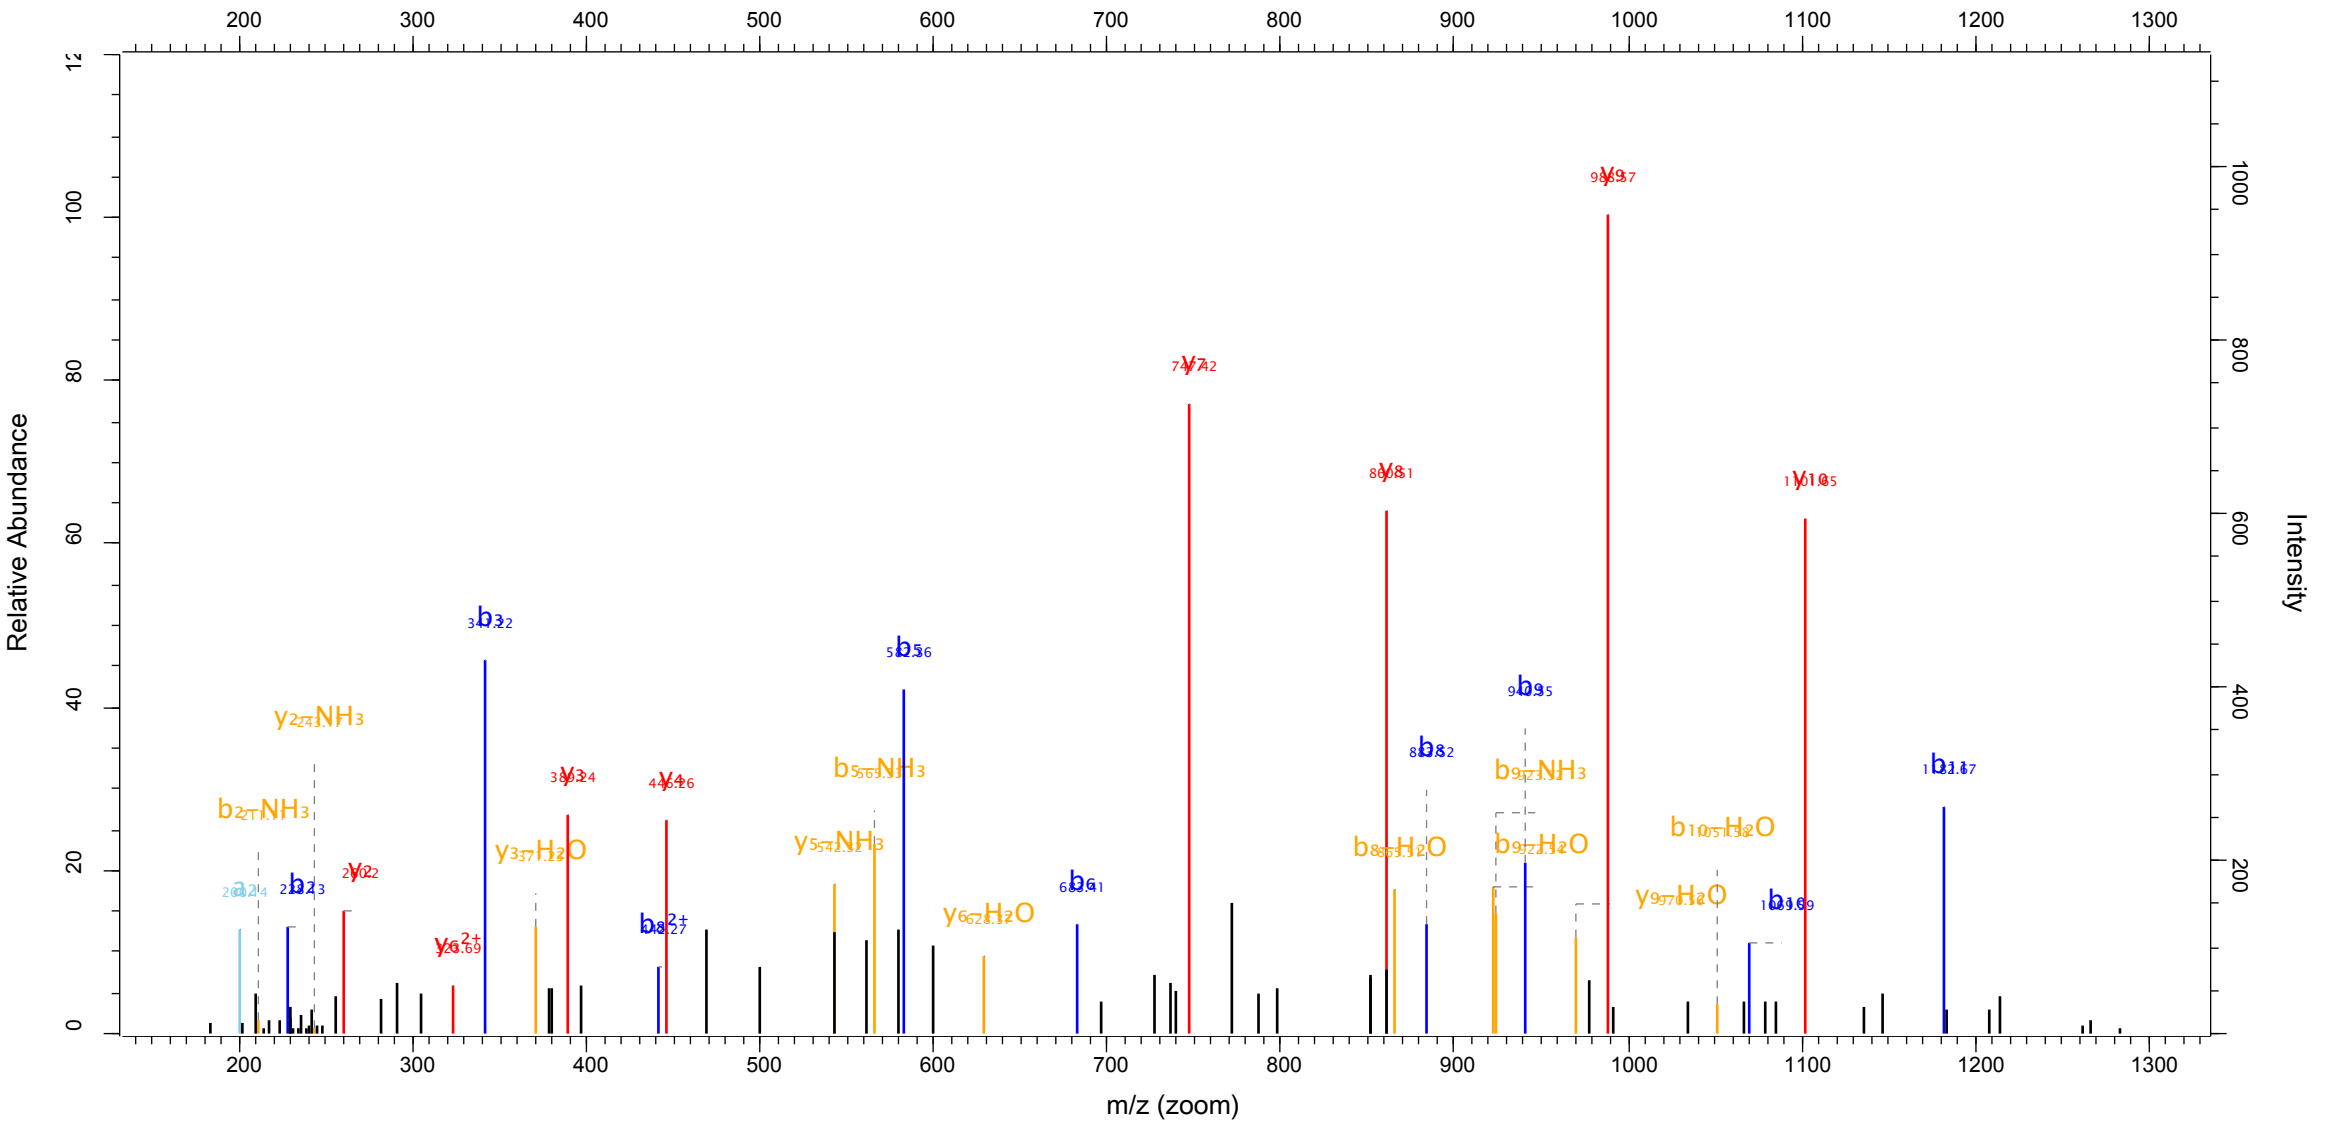

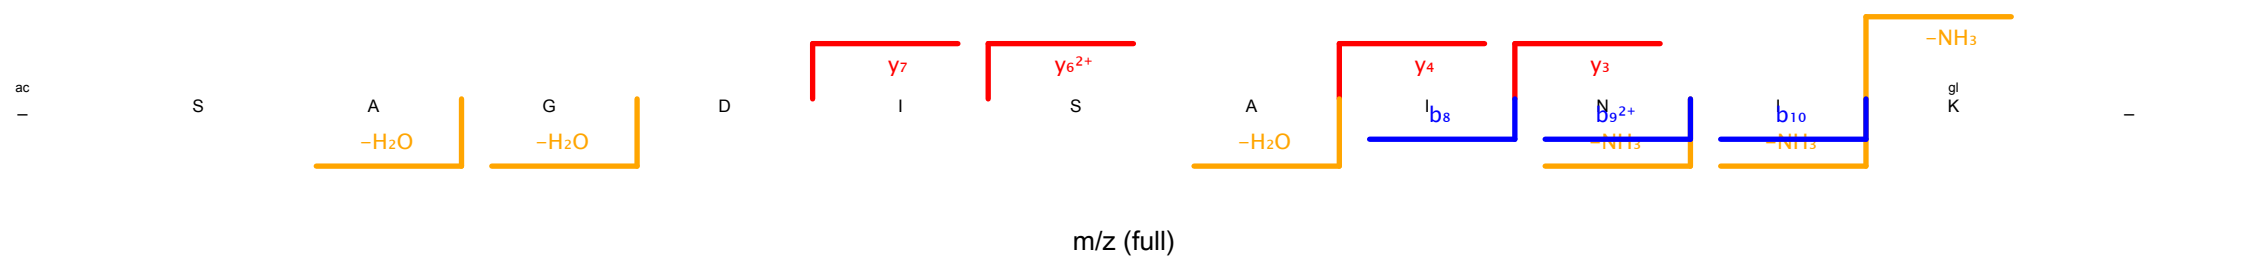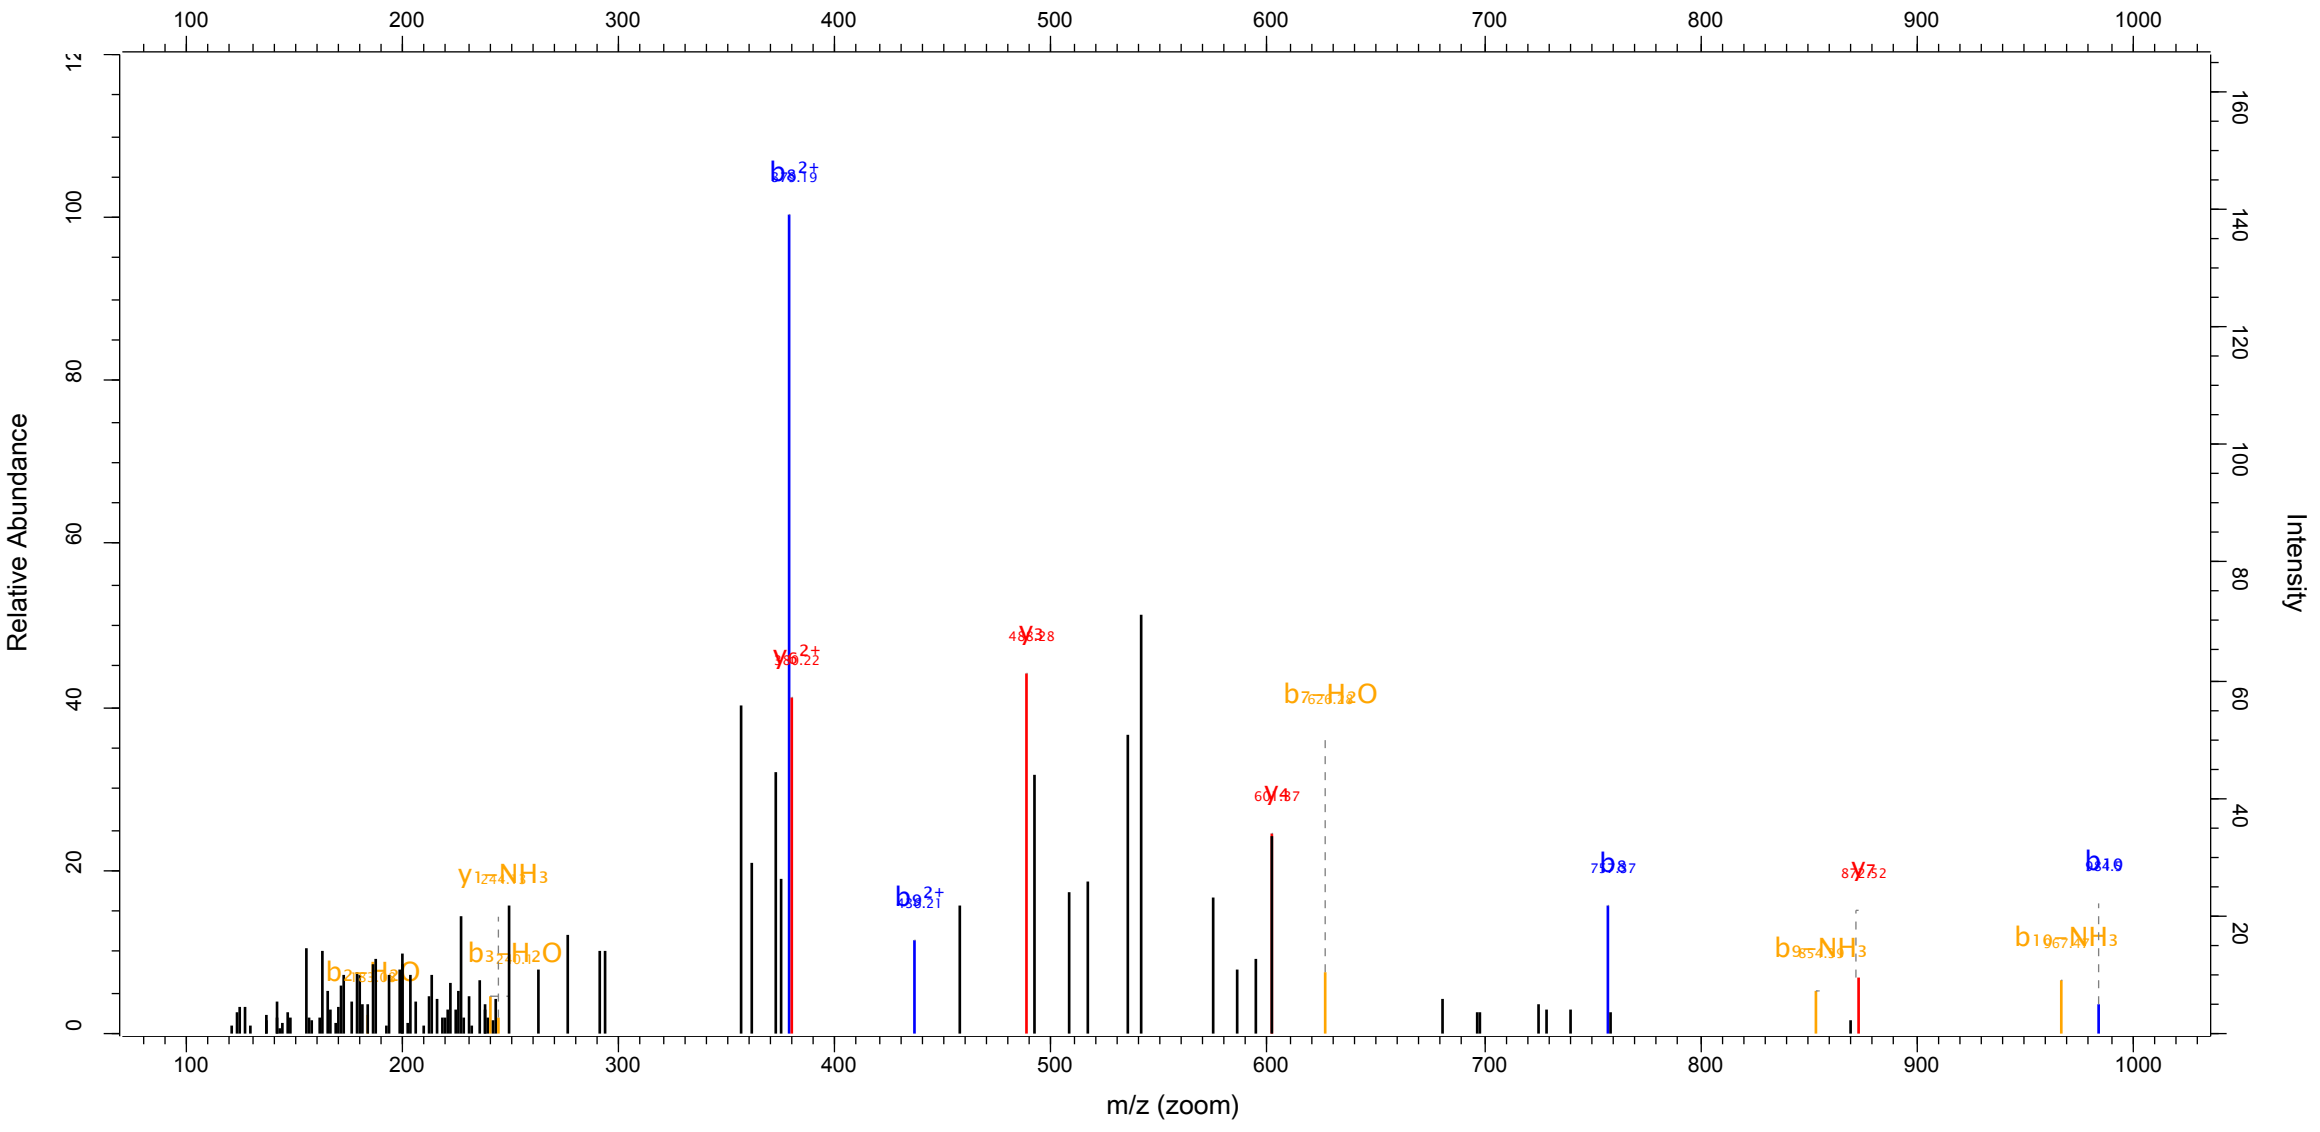

Scan number 17513 Raw file nak\_cdc48UbconjugatecontrolSAX6\_21may25\_100524125641  
 Method ITMS; CID Pepti... 153.38

Protein Group 2114

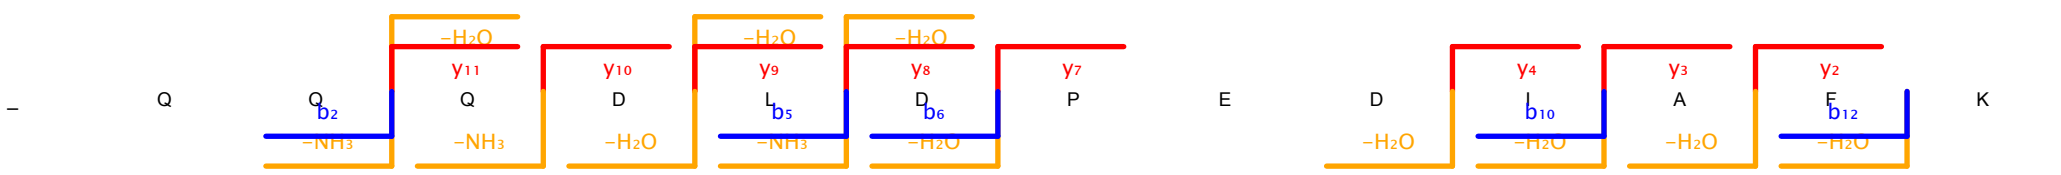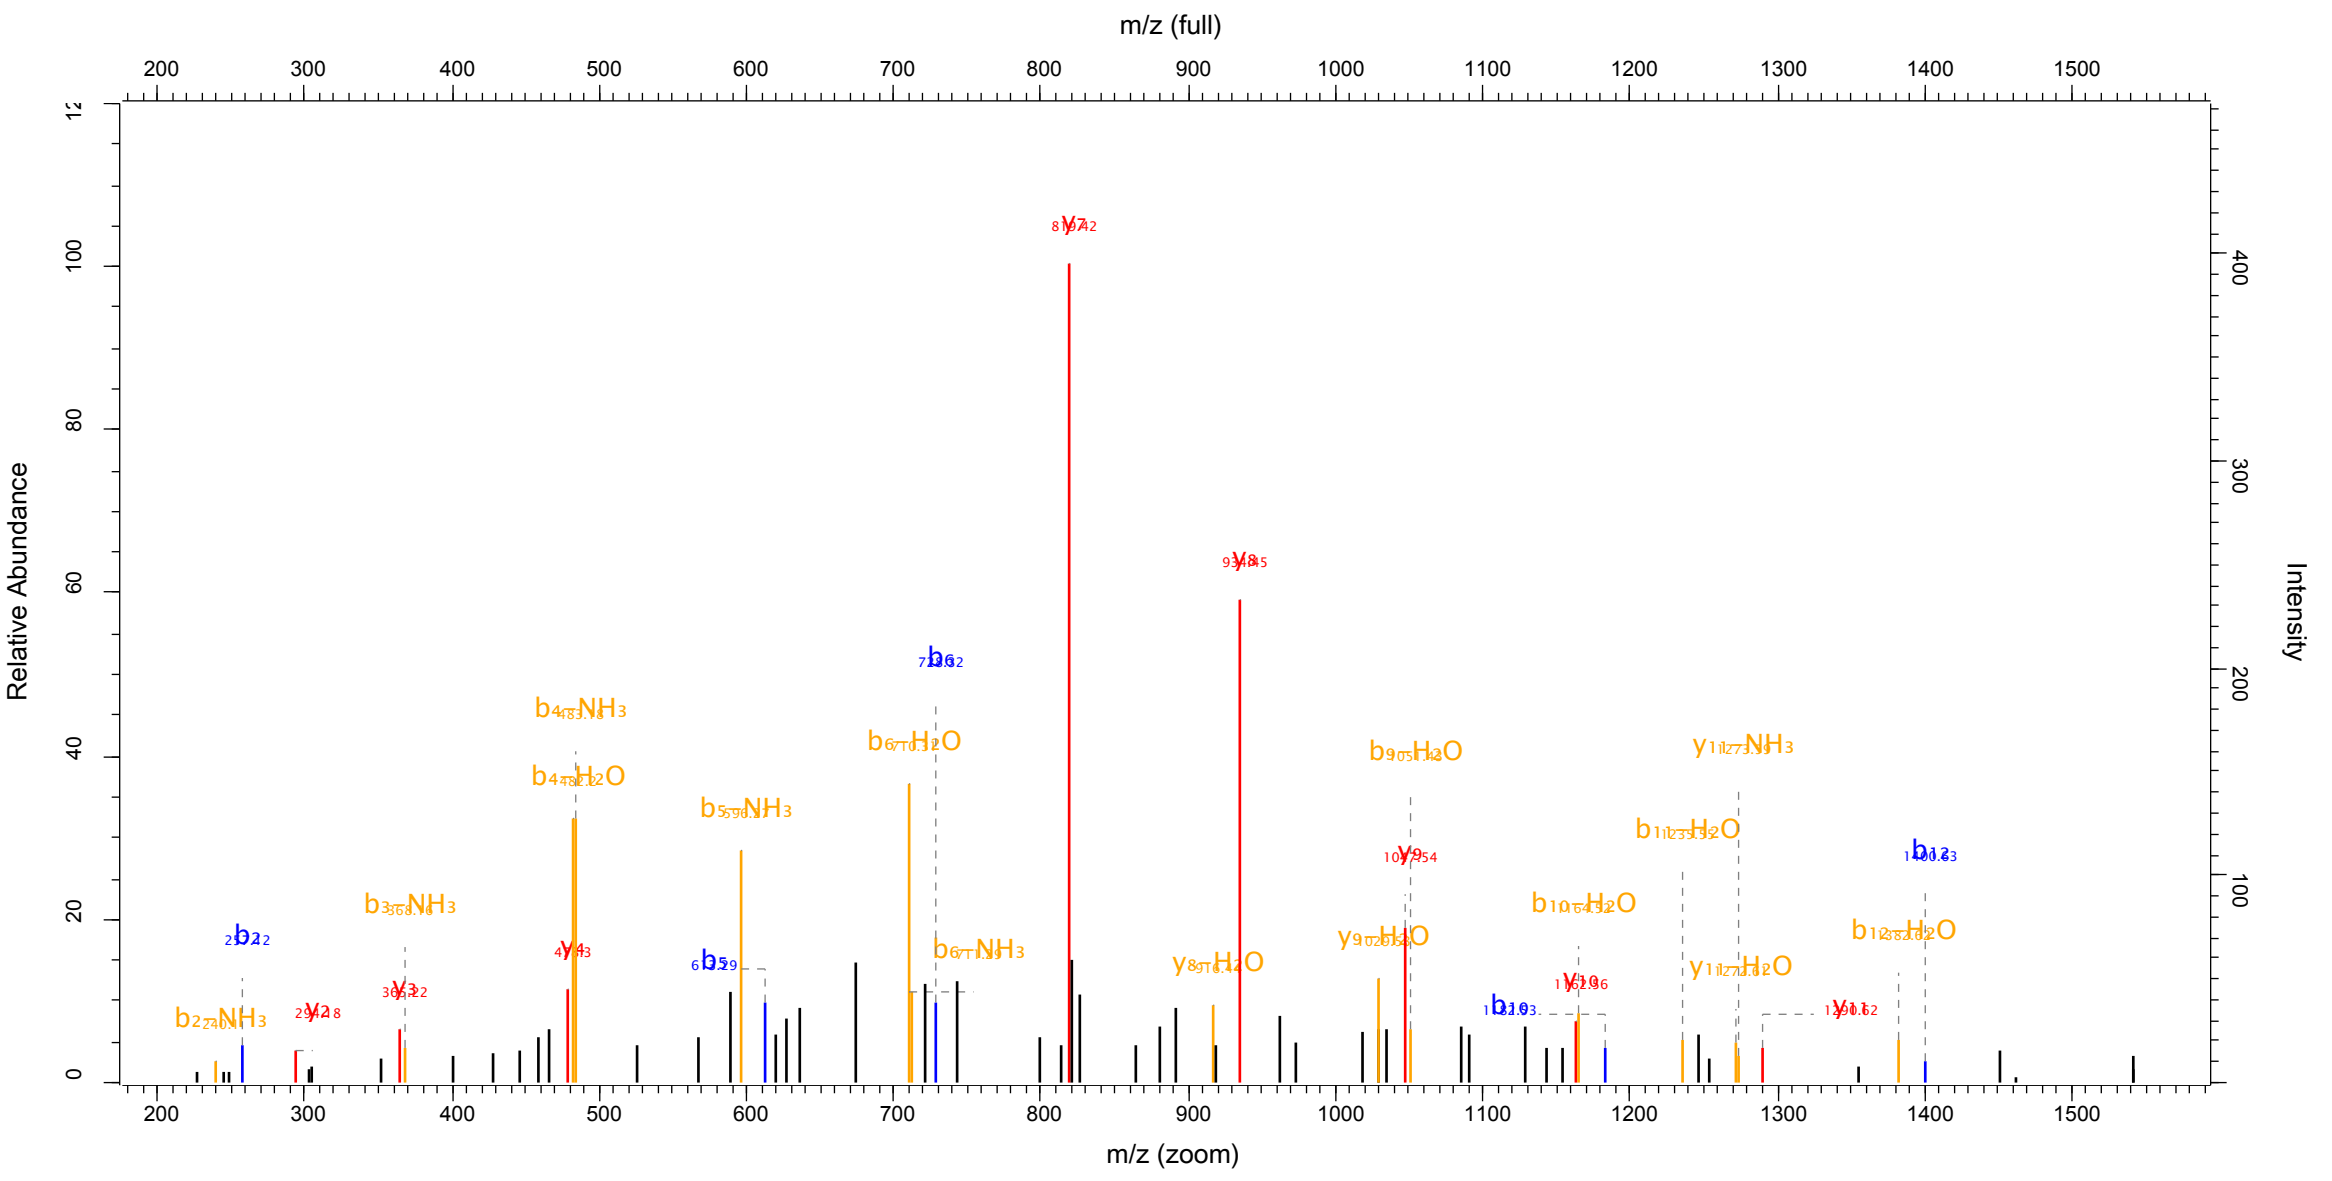

Scan number 21834 Raw file nak\_cdc48UbconjugatesSAX6\_14may10\_10  
 Method ITMS; CID Pepti... 121.01

**Protein Group 2171**

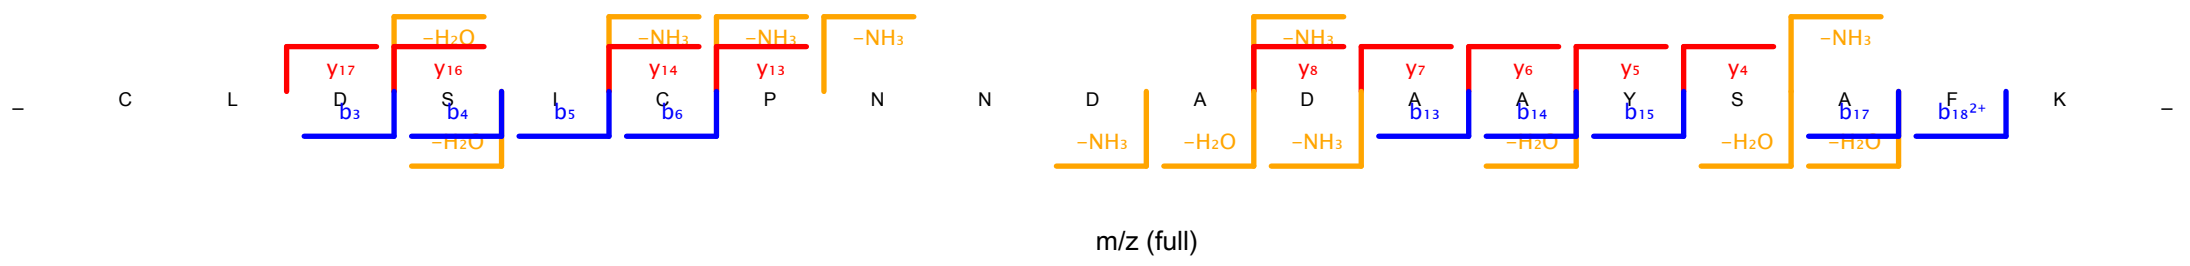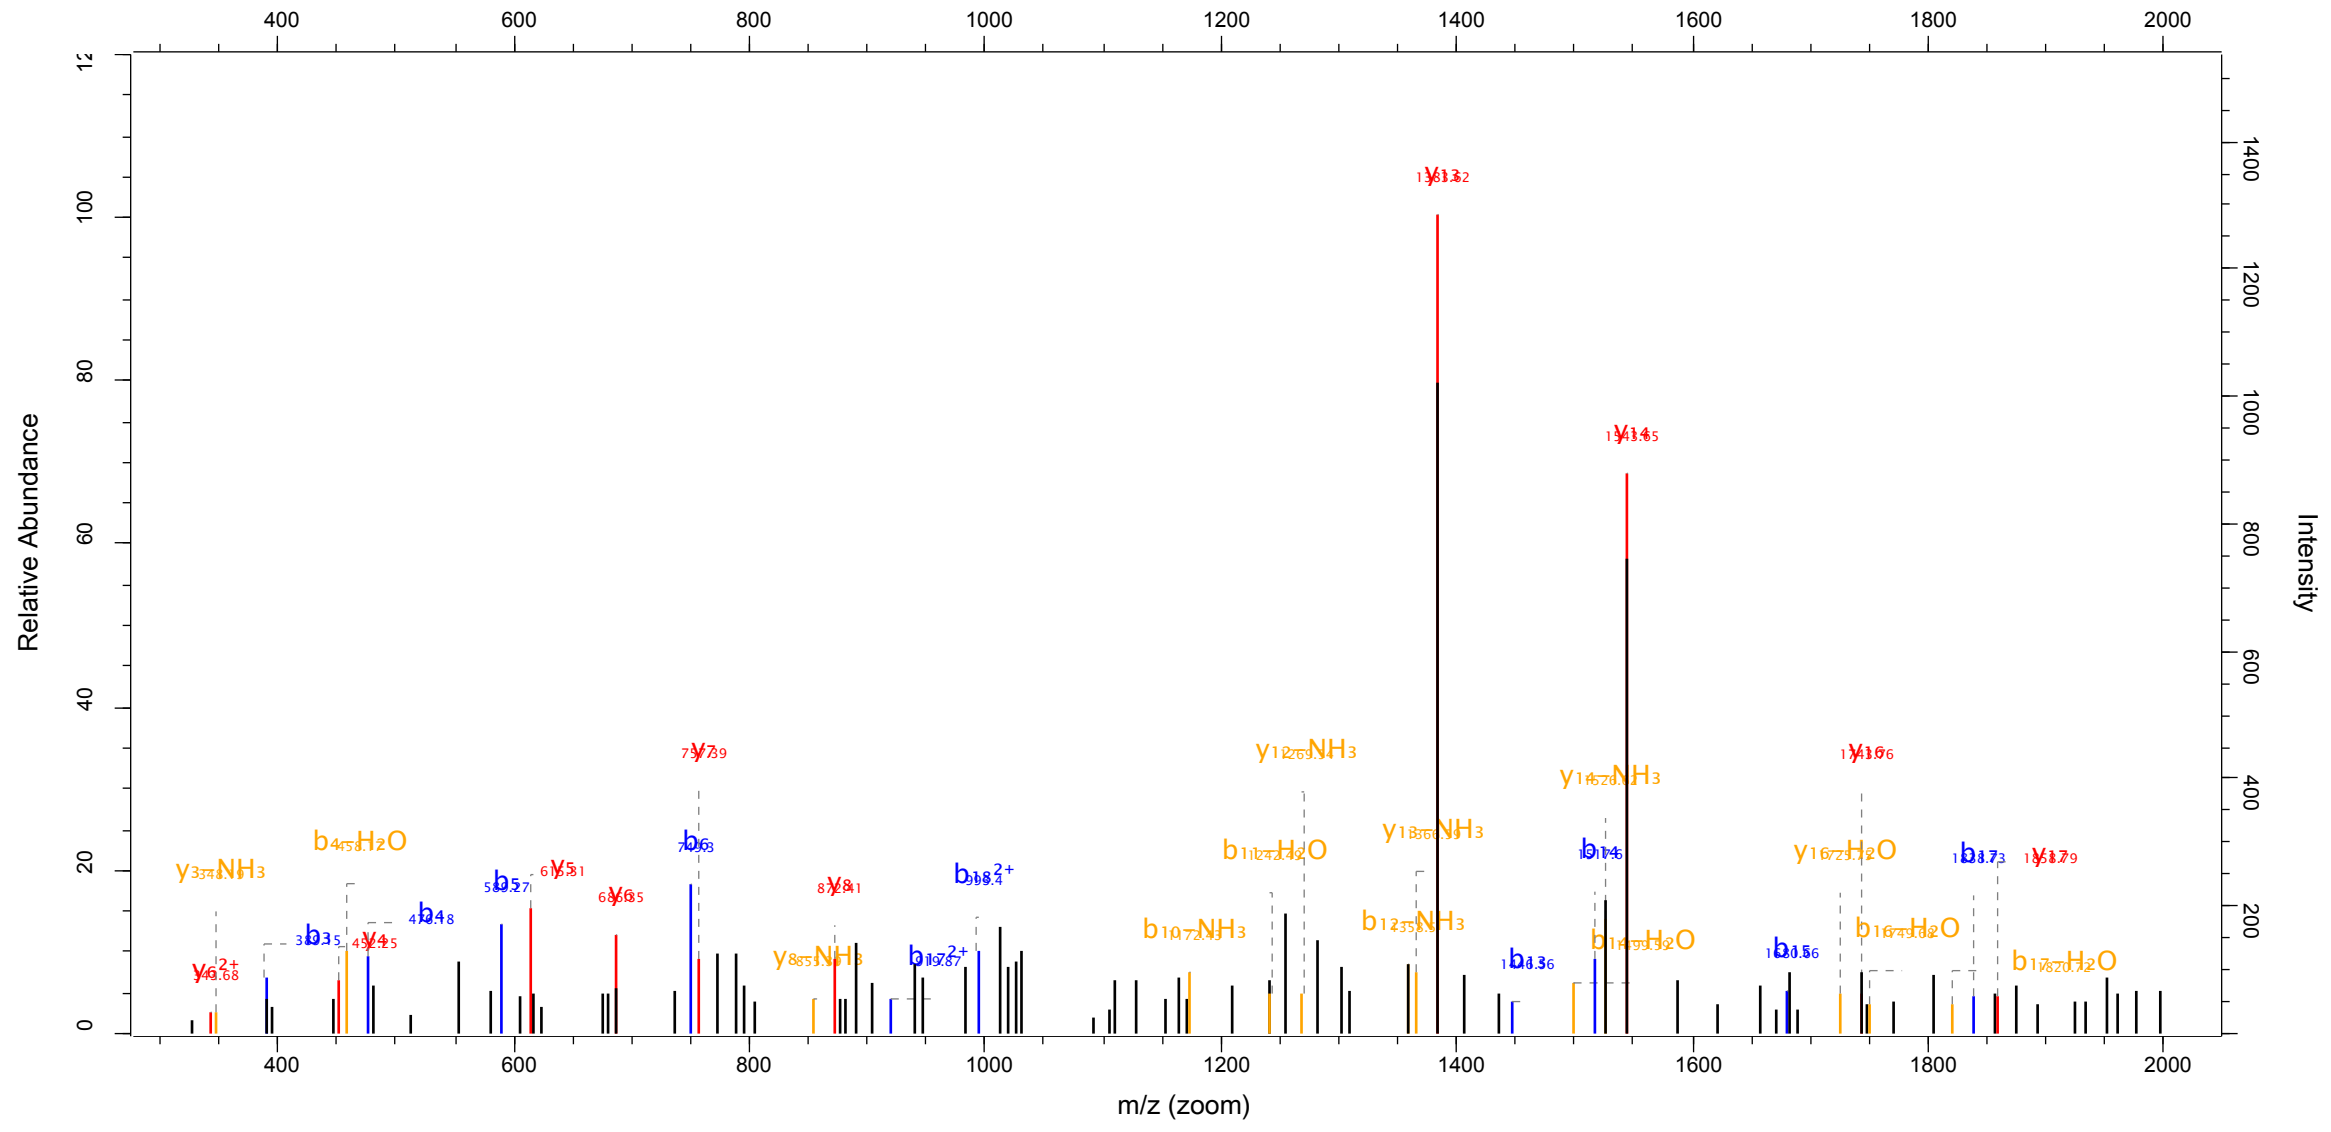

Scan number 27966  
Method ITMS; CID

Raw file nak\_cdc48UbconjugatesSAX6\_22may10\_7  
Pepti... 122.63

Protein Group 2183

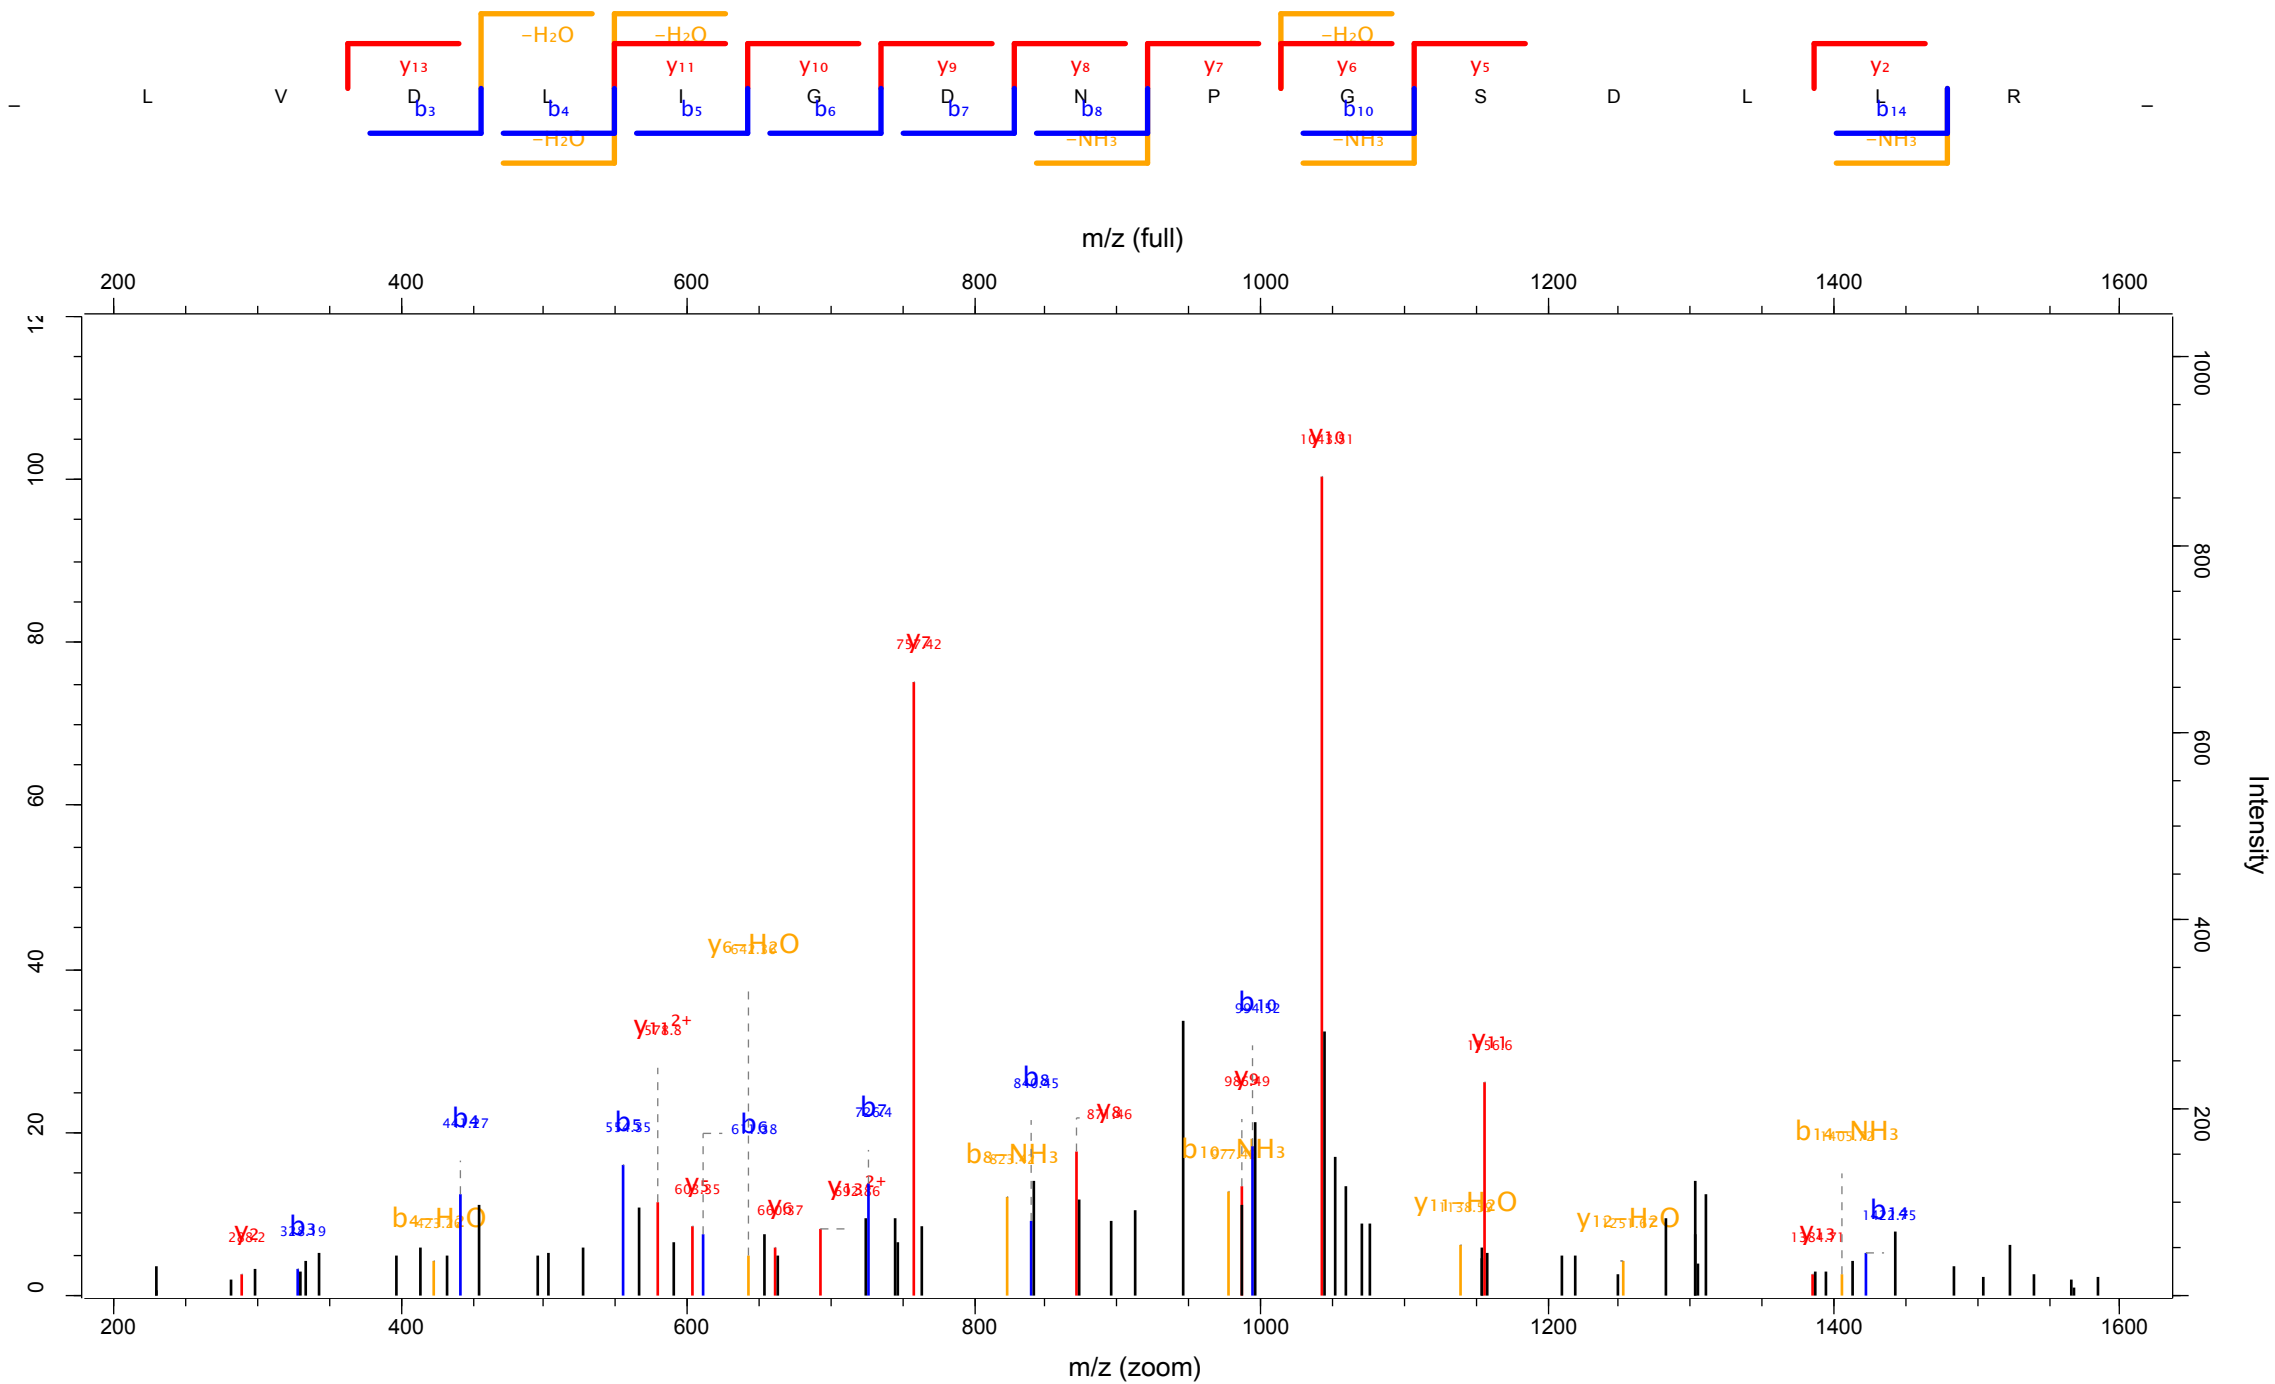

Scan number 20632 Raw file nak\_WTonetooneSAX4\_4feb11\_04  
 Method ITMS; CID Pepti... 121.18

Protein Group 2216

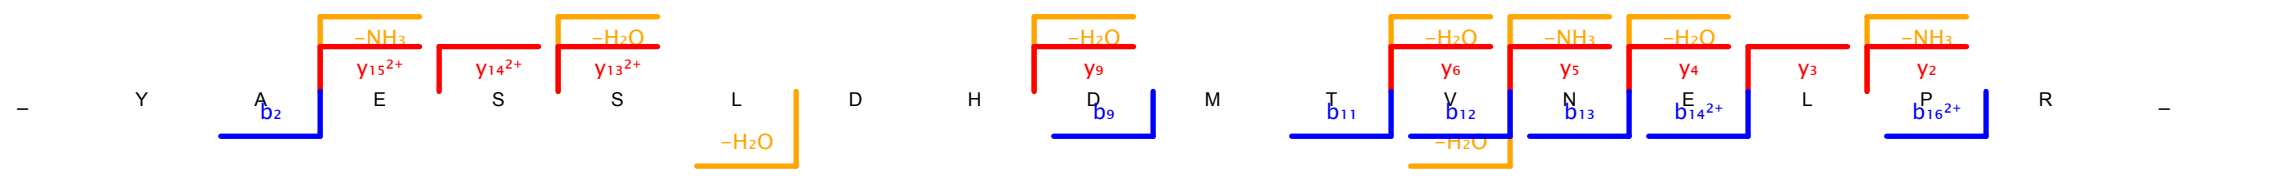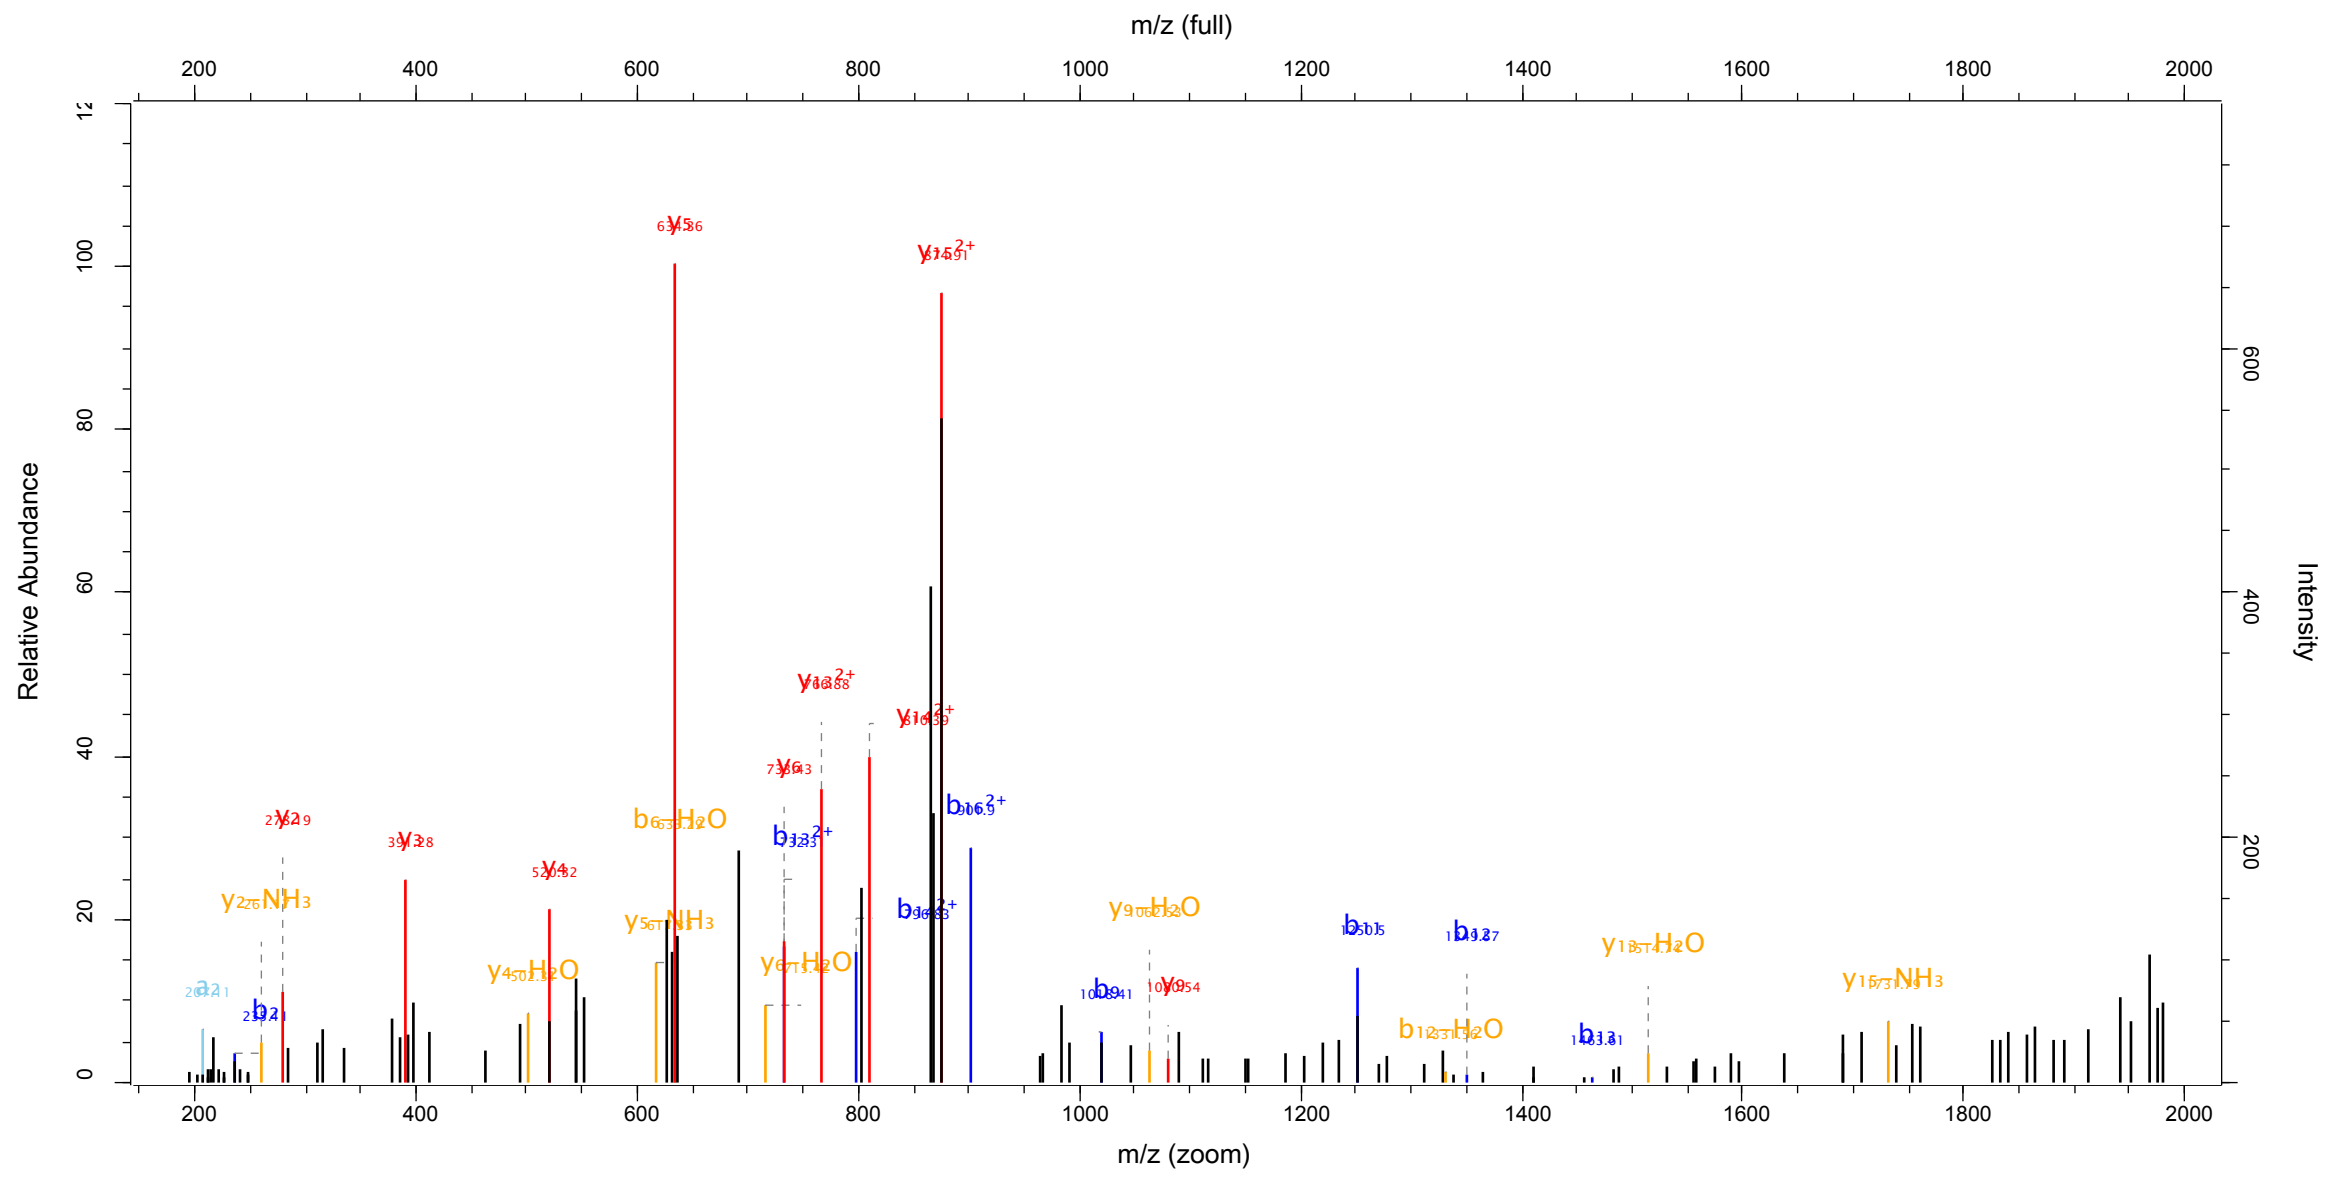



Scan number  
Method

22923  
ITMS; CID

Raw file  
Pepti...

nak\_cdc48UbconjugatecontrolSAX2\_21 may21  
152.4

Protein Group 2233

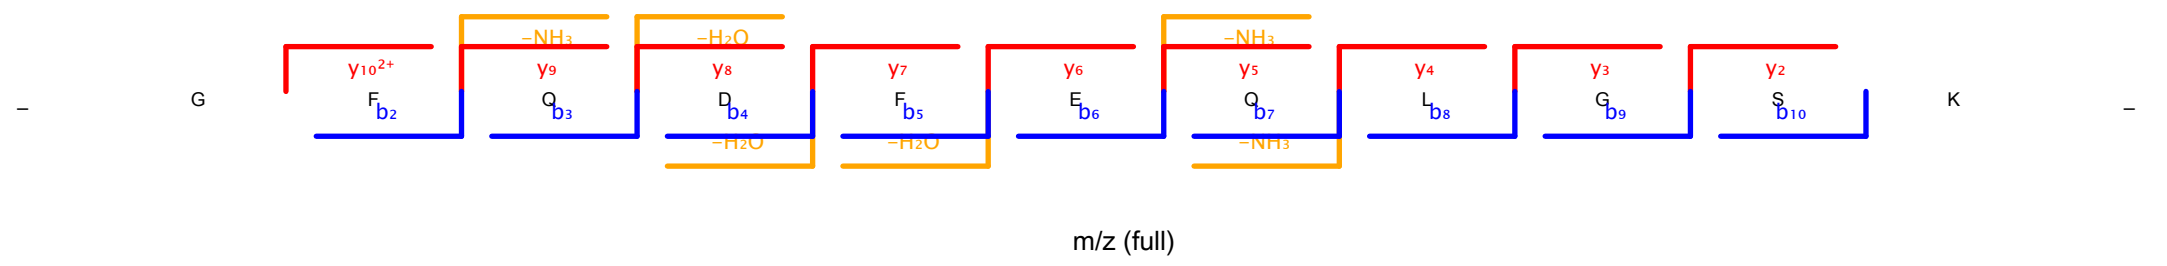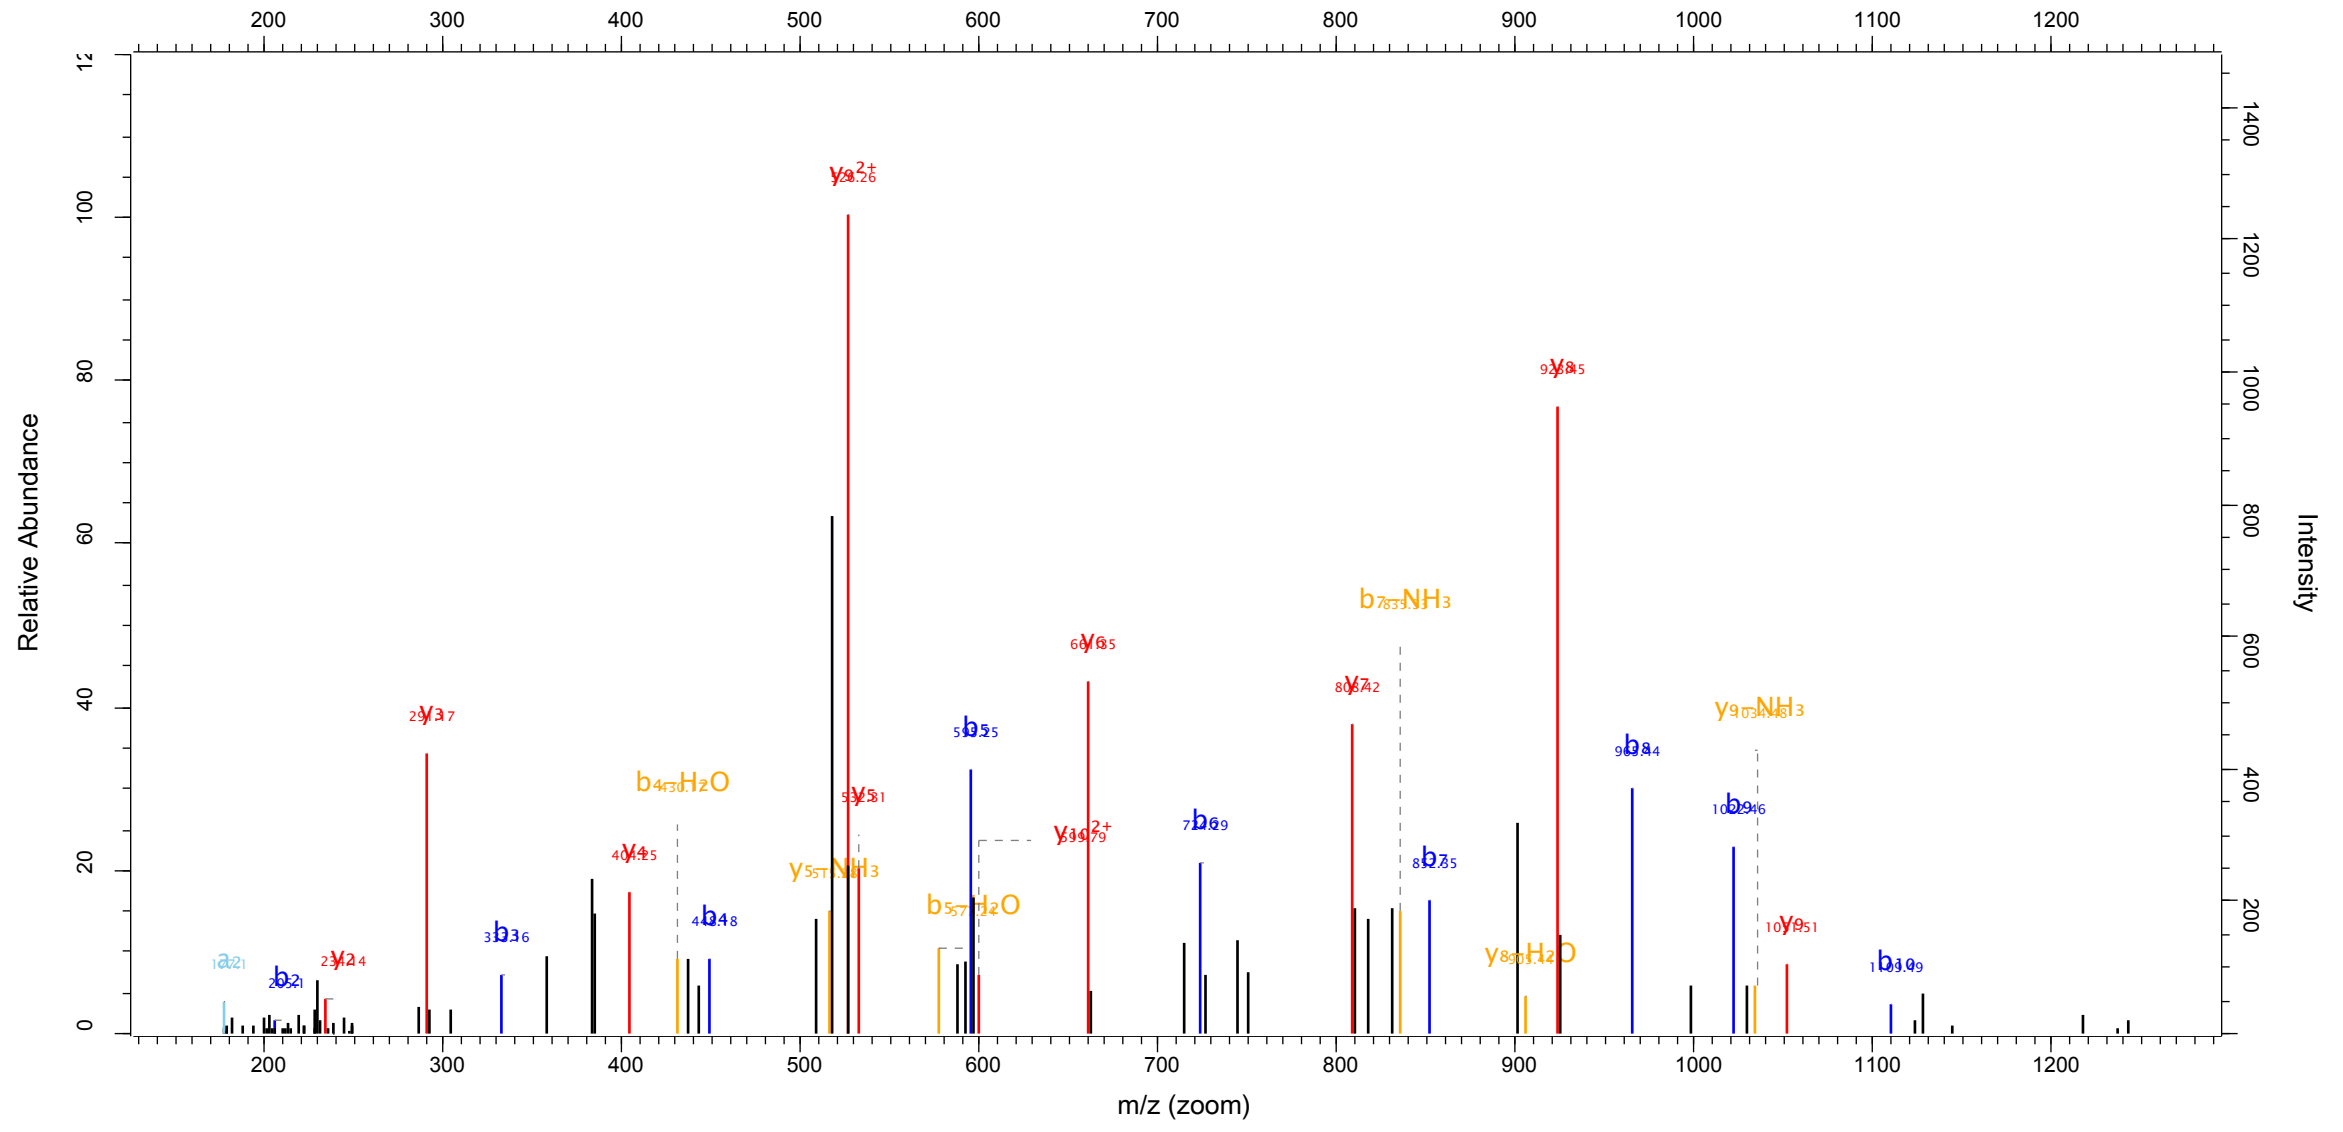

Scan number 39190  
Method ITMS; CID

Raw file nak\_cdc48UbconjugatesSAX2\_14may10\_06  
Pepti... 138.94

Protein Group 2249

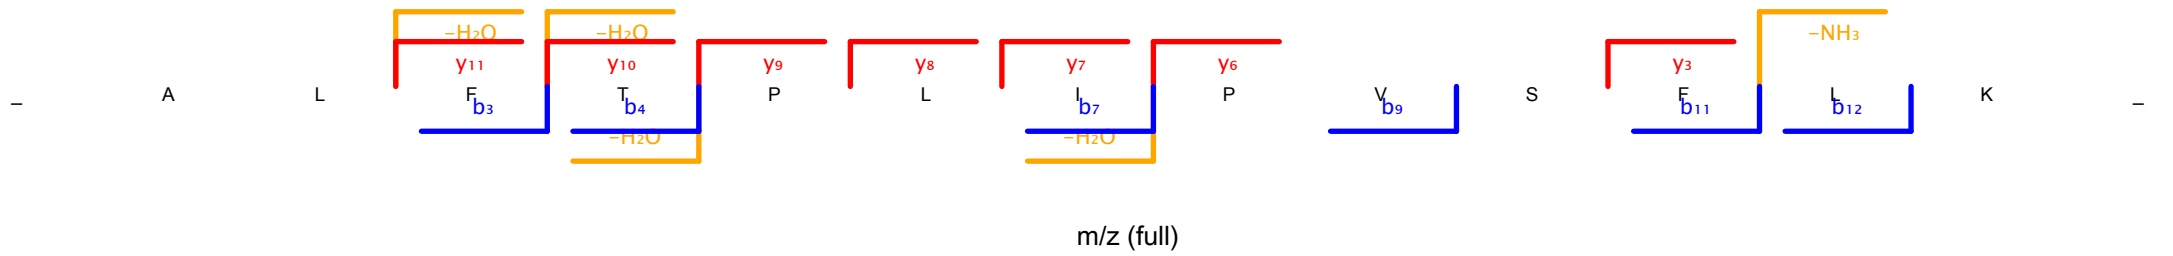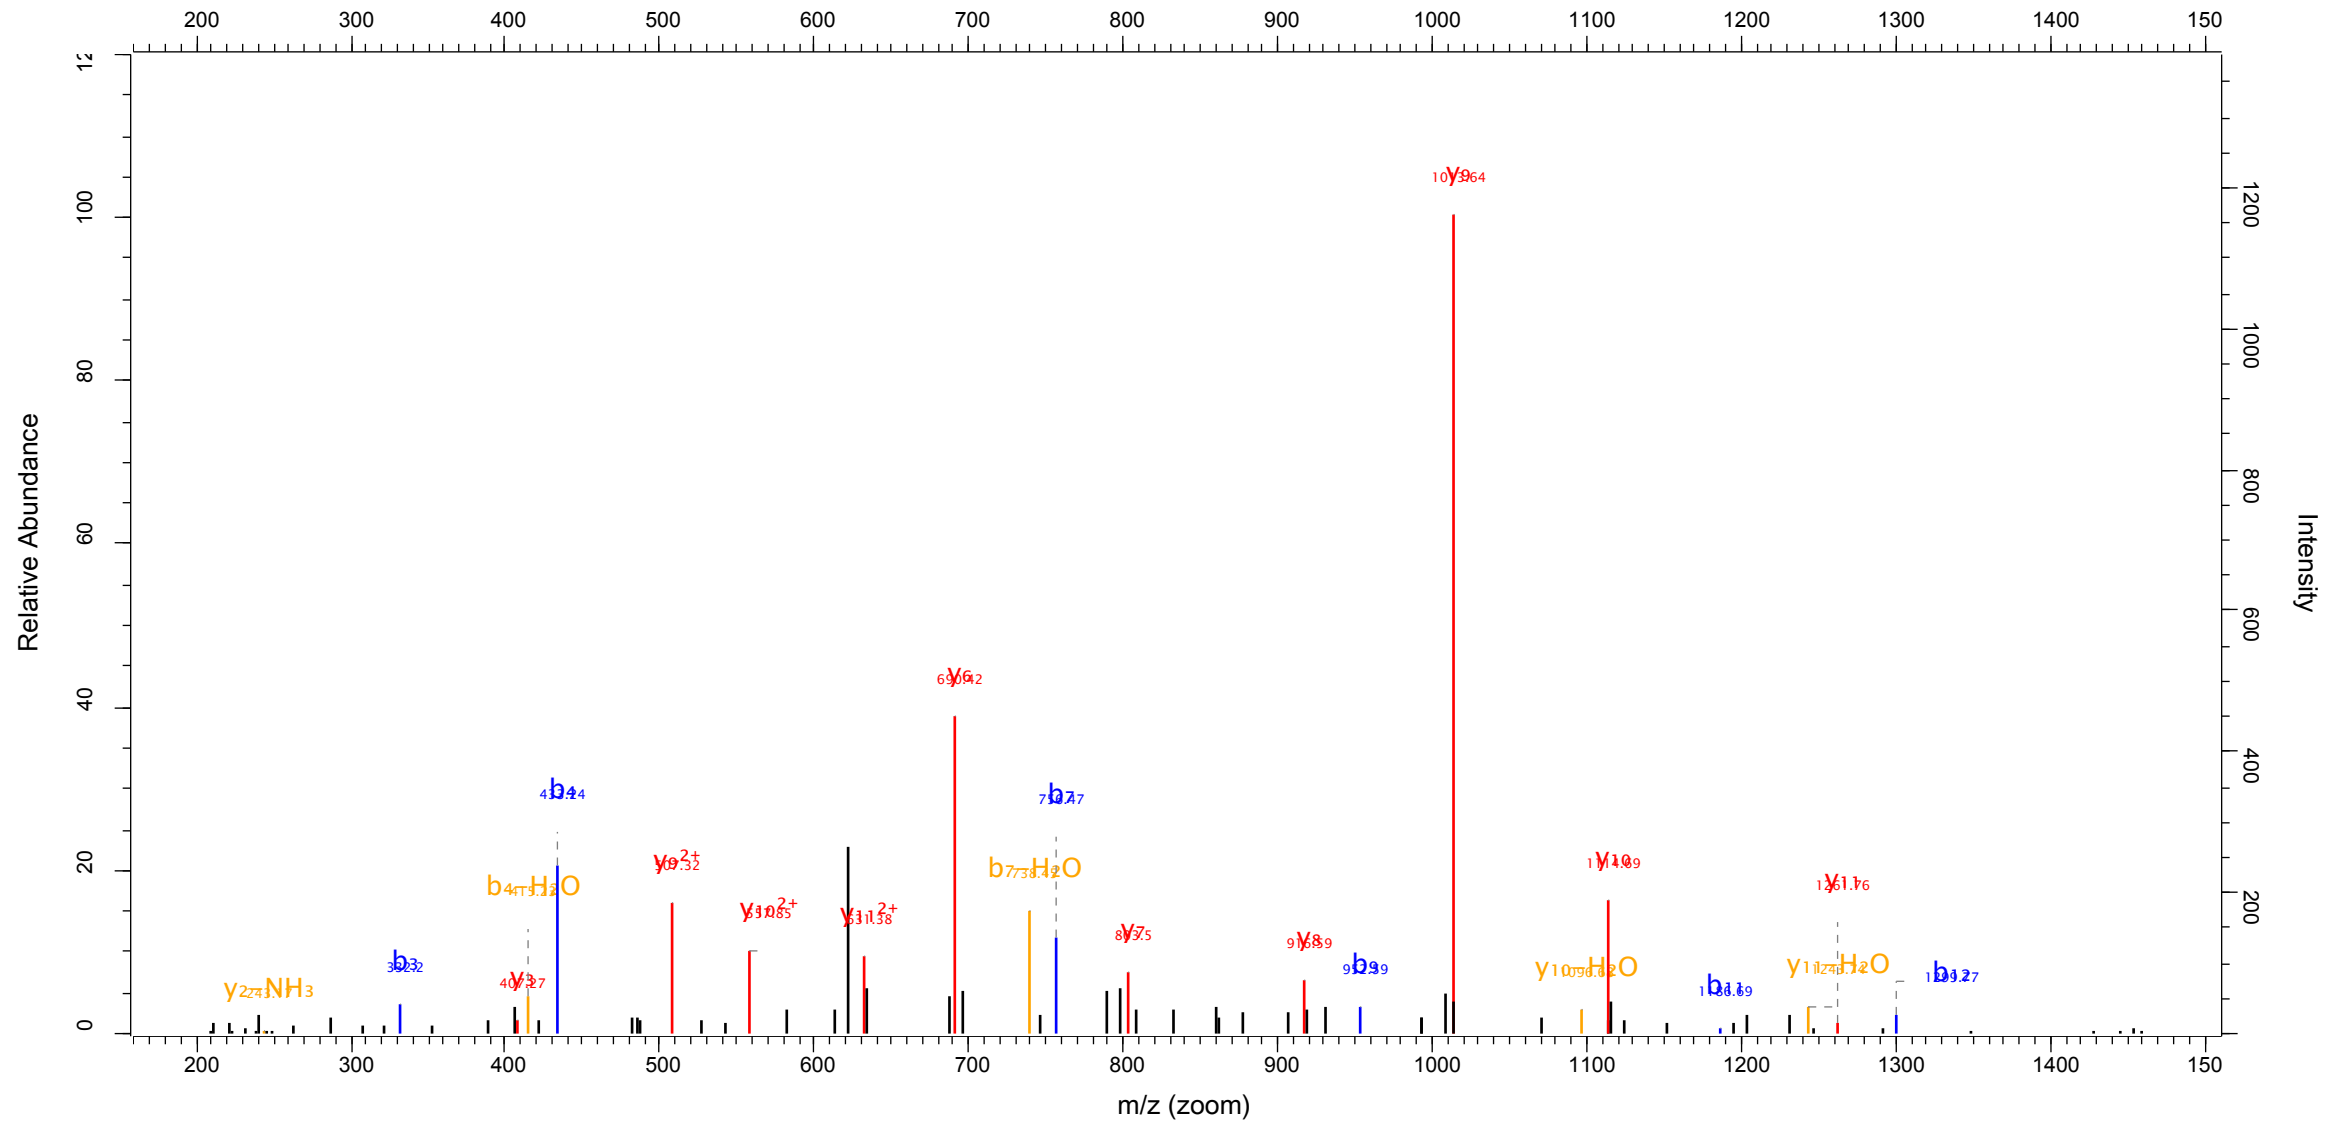

Scan number 17364 Raw file nak\_cdc48UbconjugatesSAX5\_14may10\_09  
 Method ITMS; CID Pepti... 57.21

Protein Group 2290

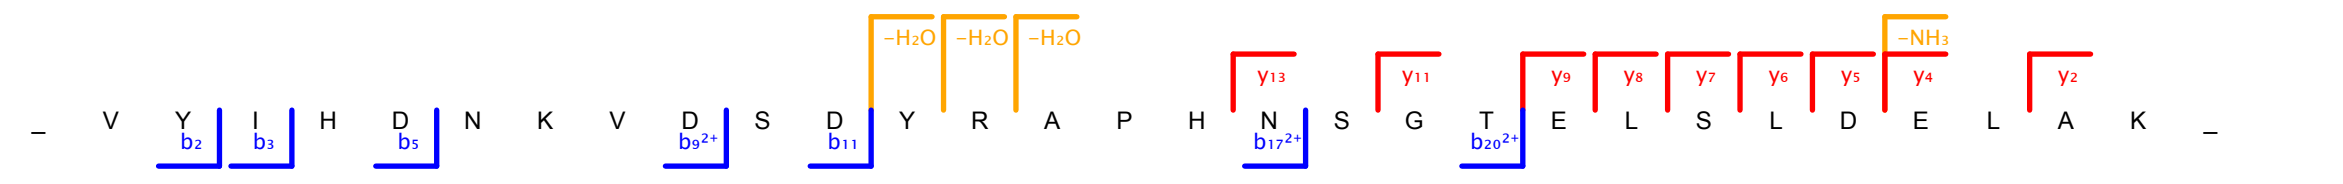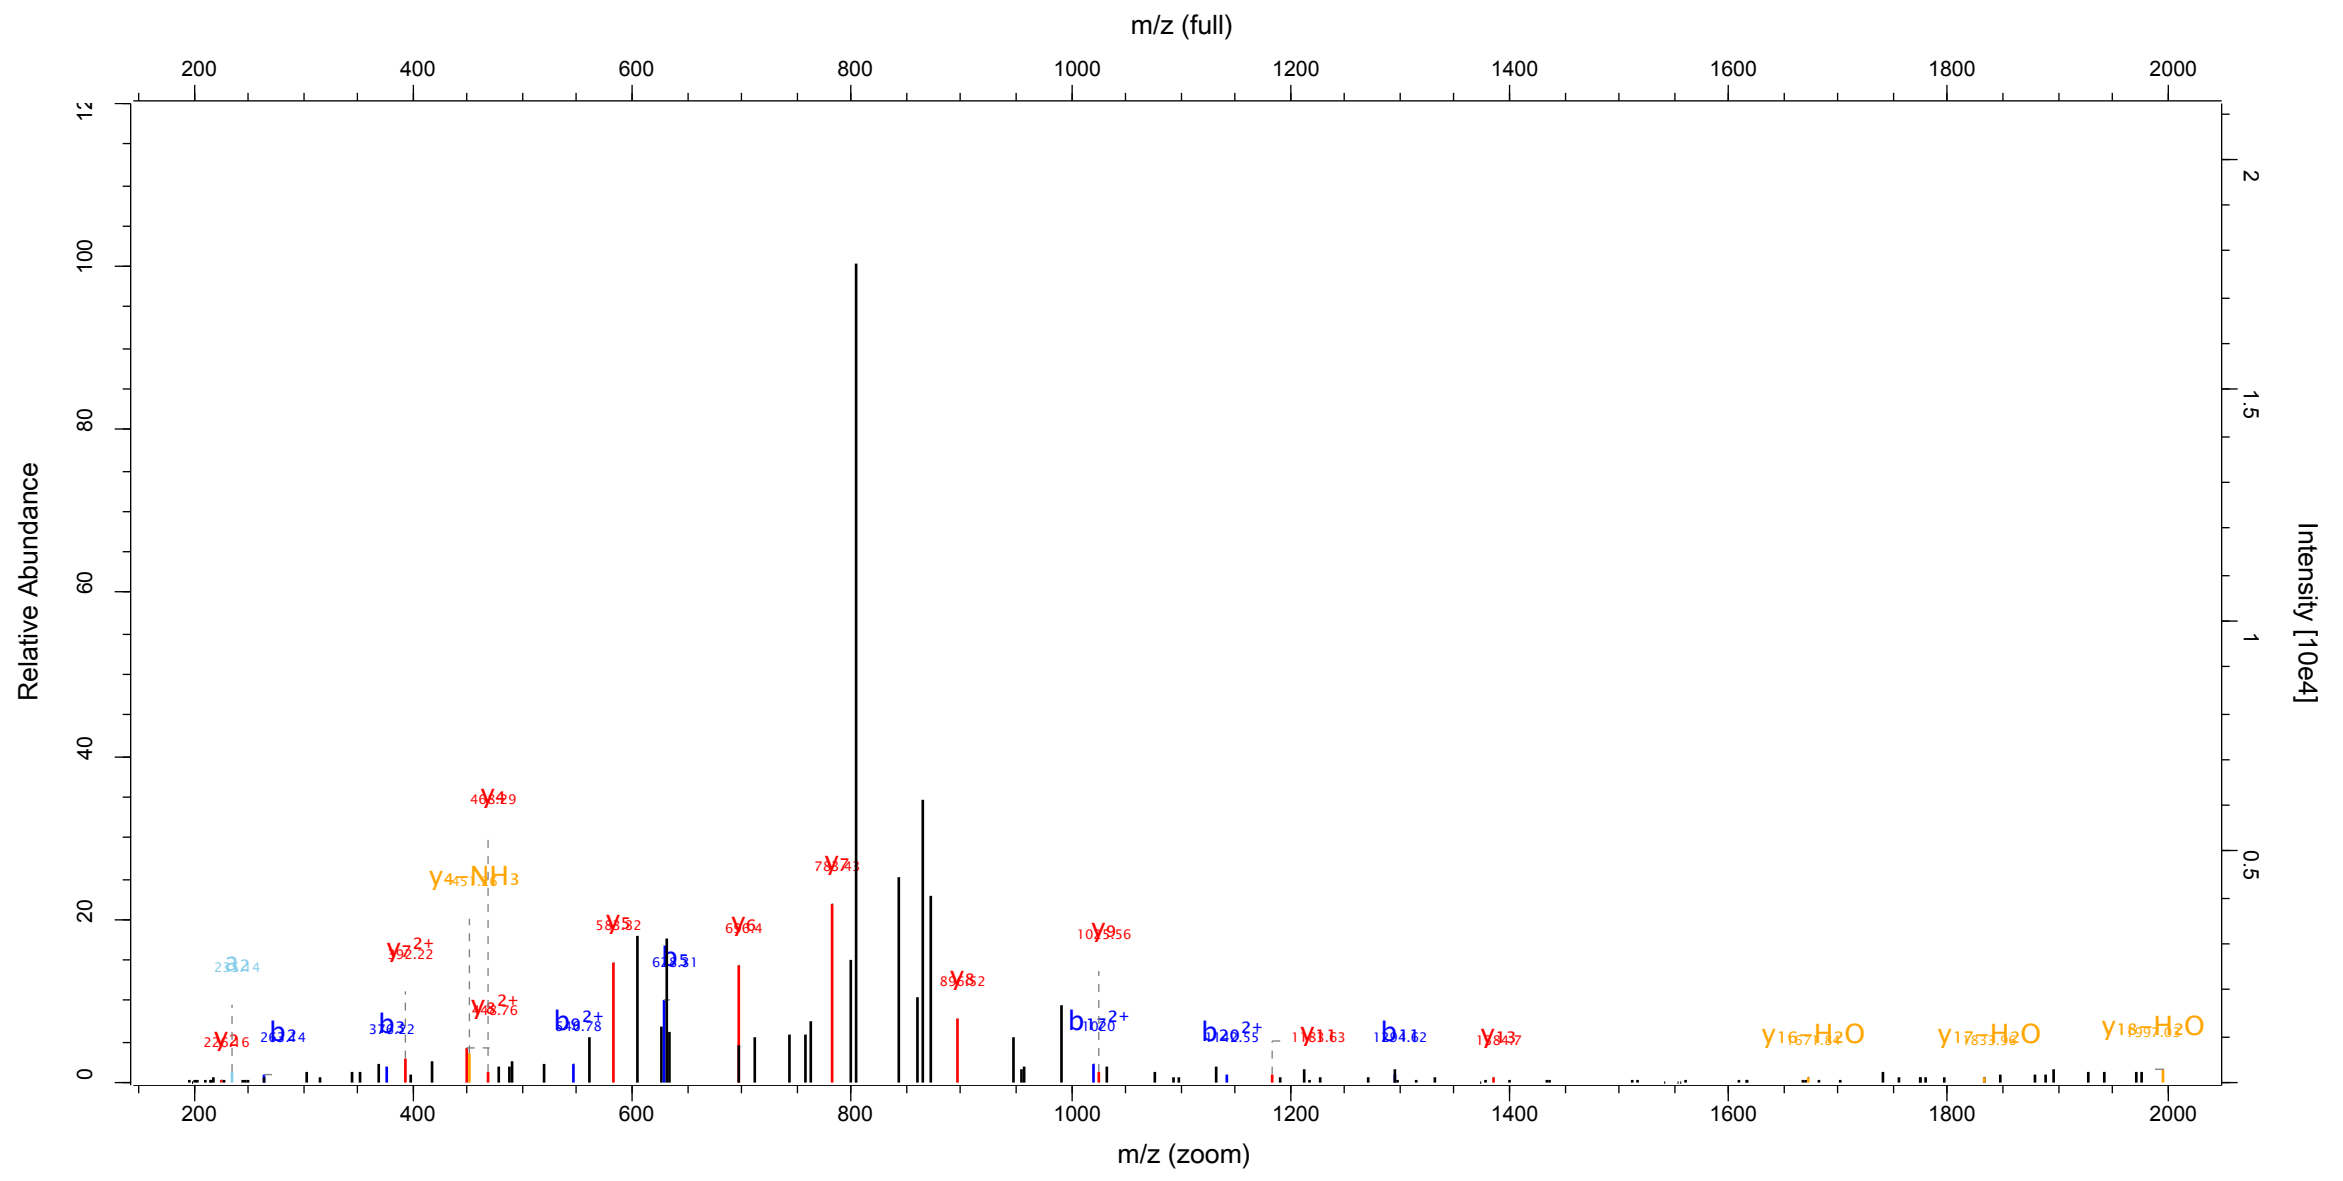

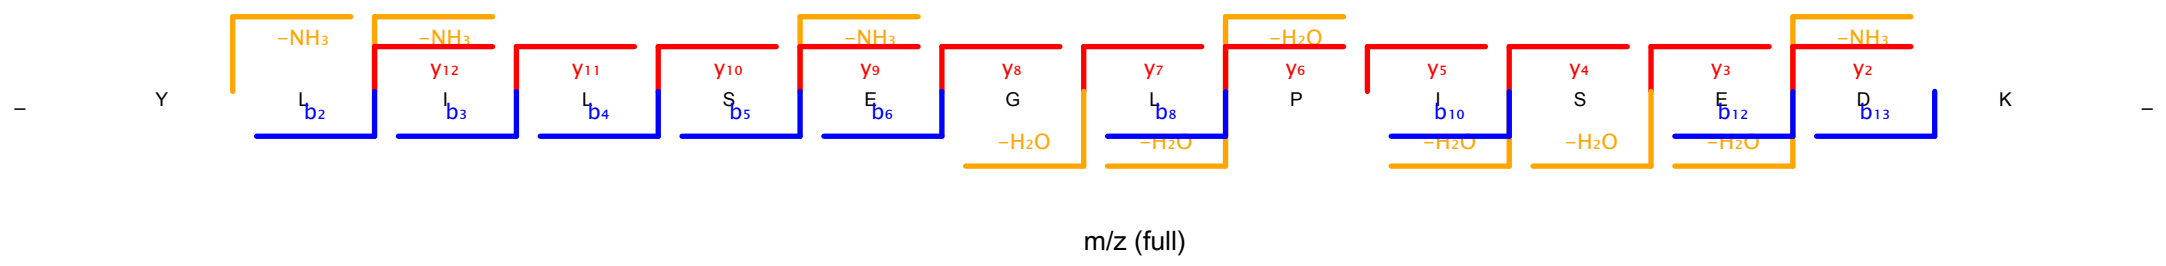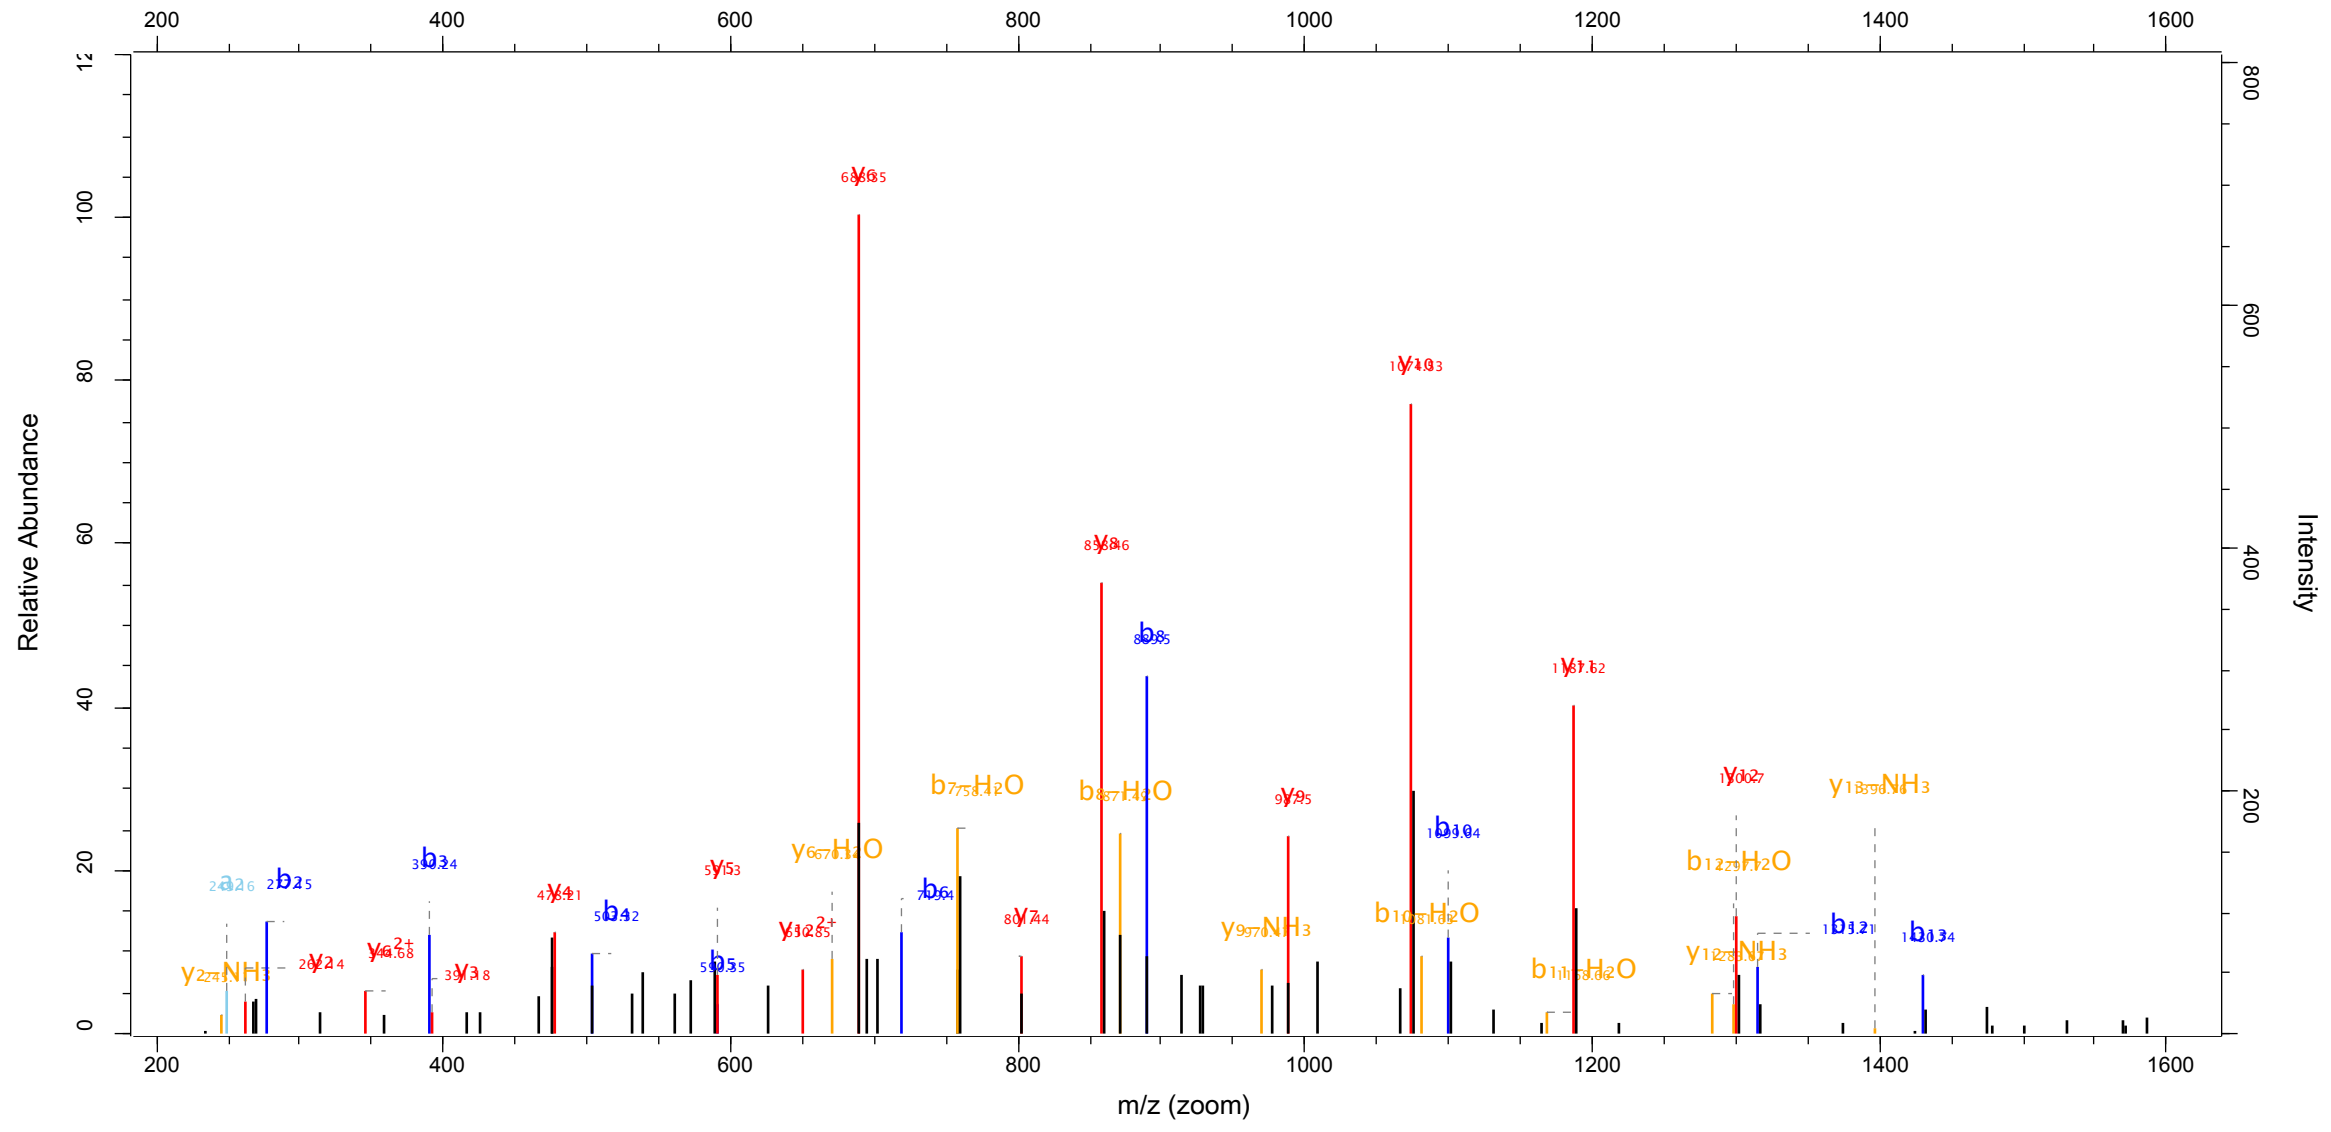

Scan number  
Method

18848  
ITMS; CID

Raw file  
Pepti...

nak\_ubx4LightSAX2\_11 nov02  
92.31

Protein Group 2316

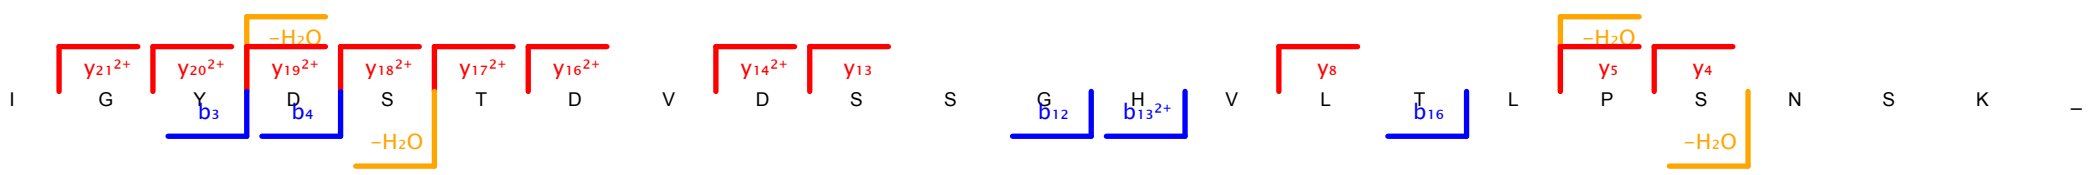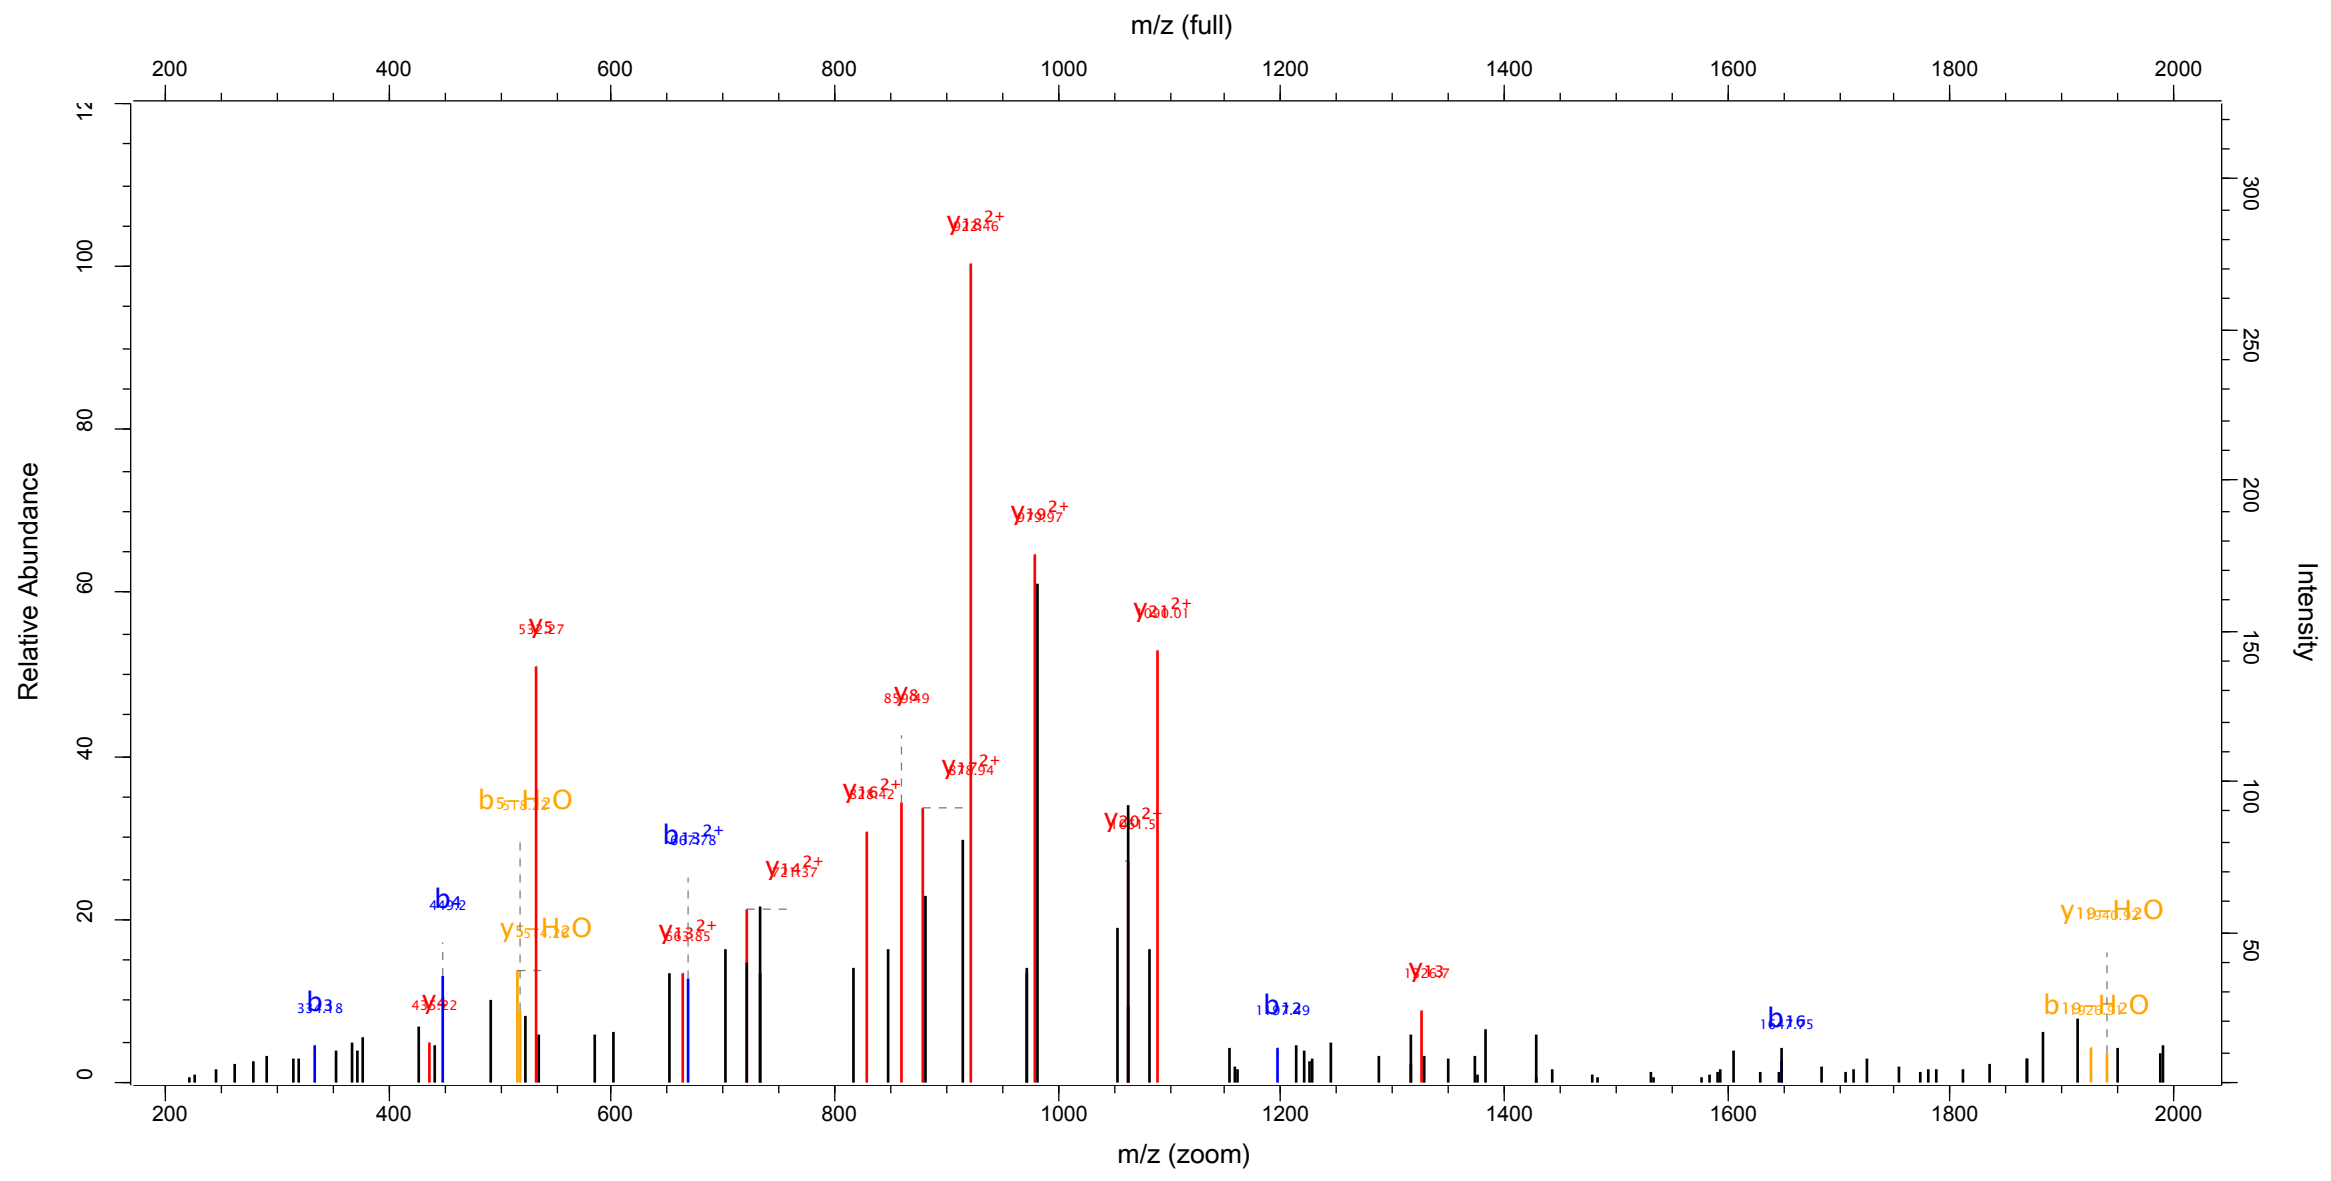

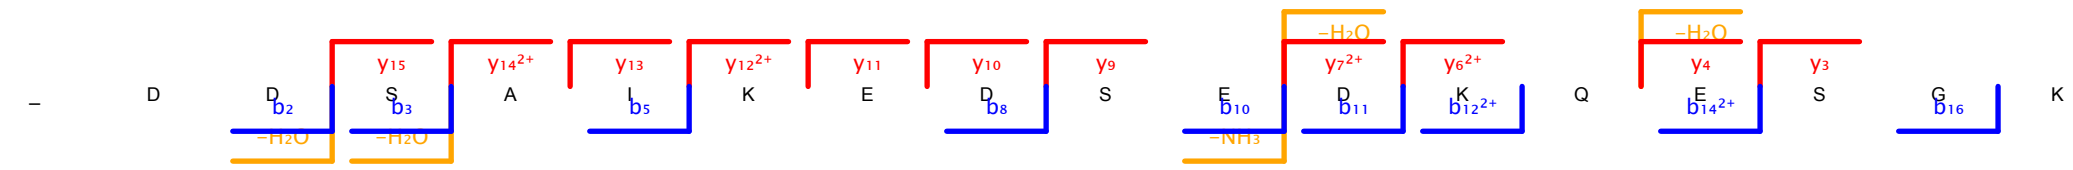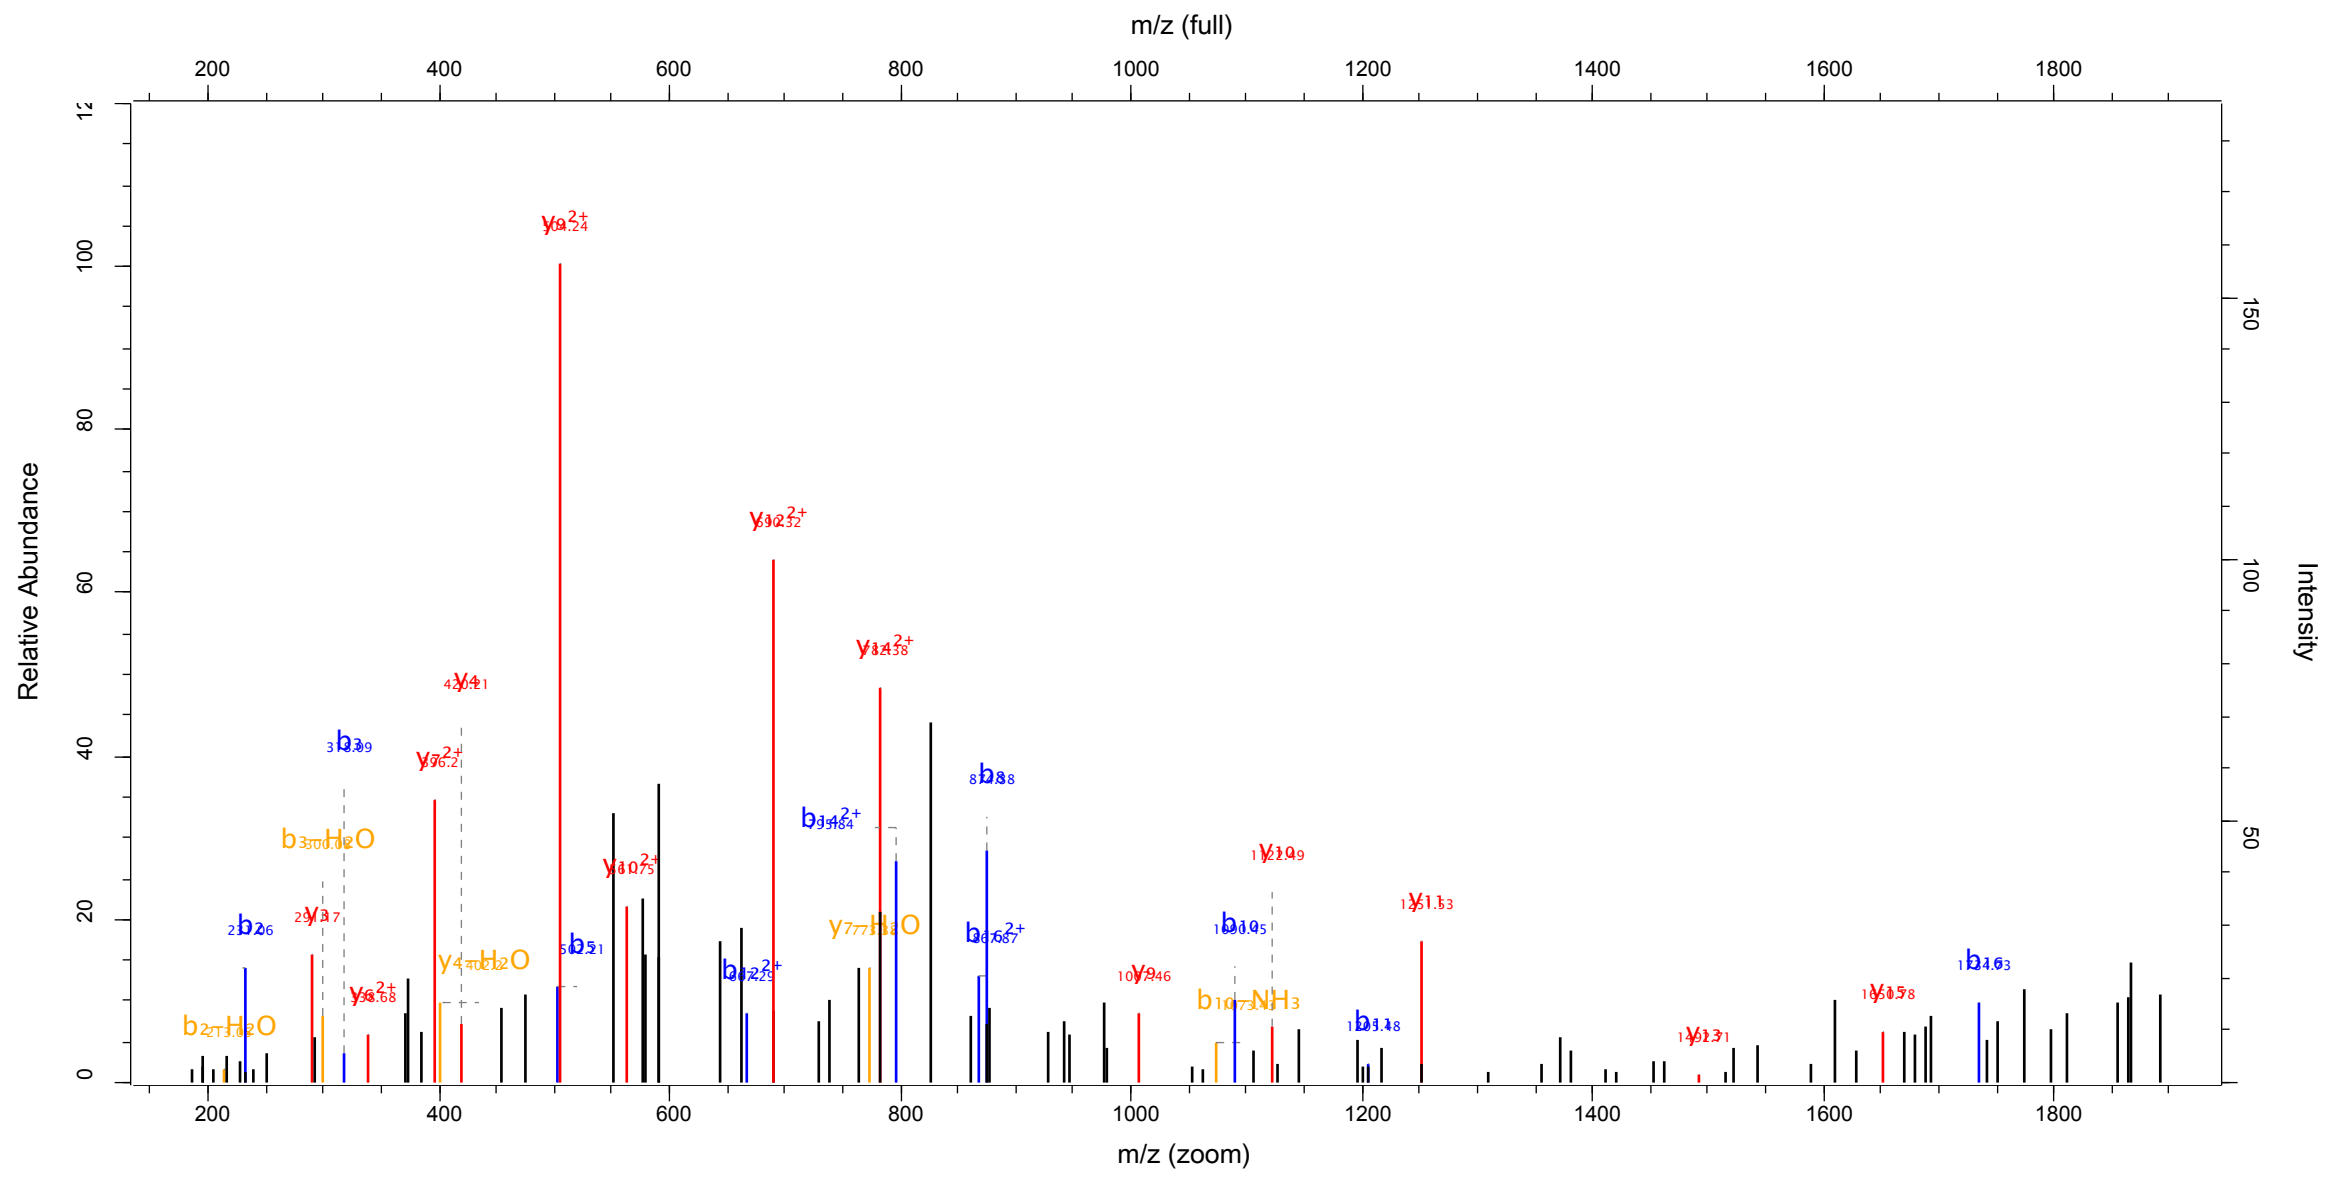

Scan number 25603 Raw file nak\_ubx4LightSAX6\_11 nov06  
Method ITMS; CID Pepti... 85.96

Protein Group 2347

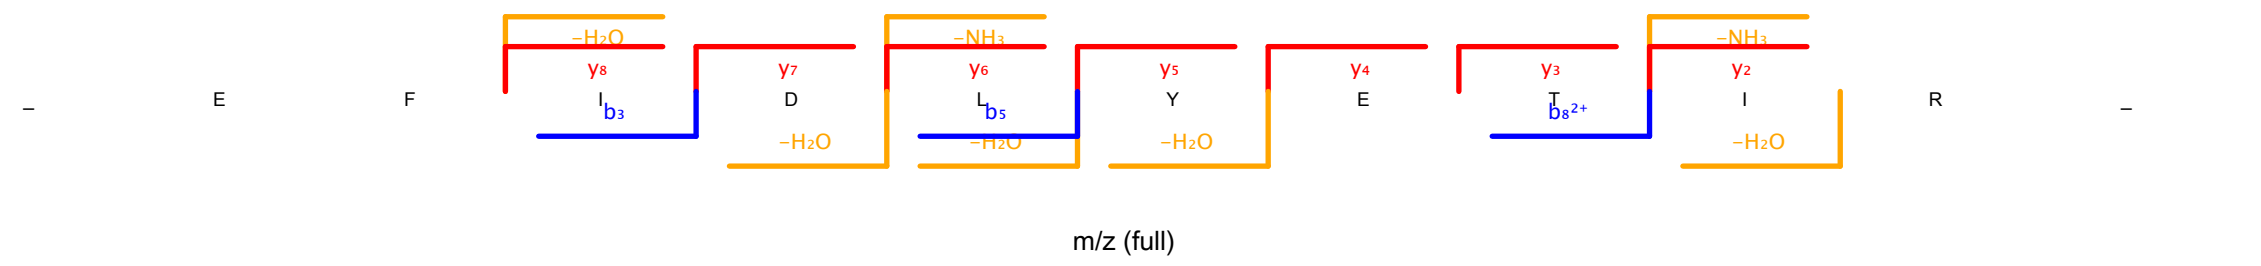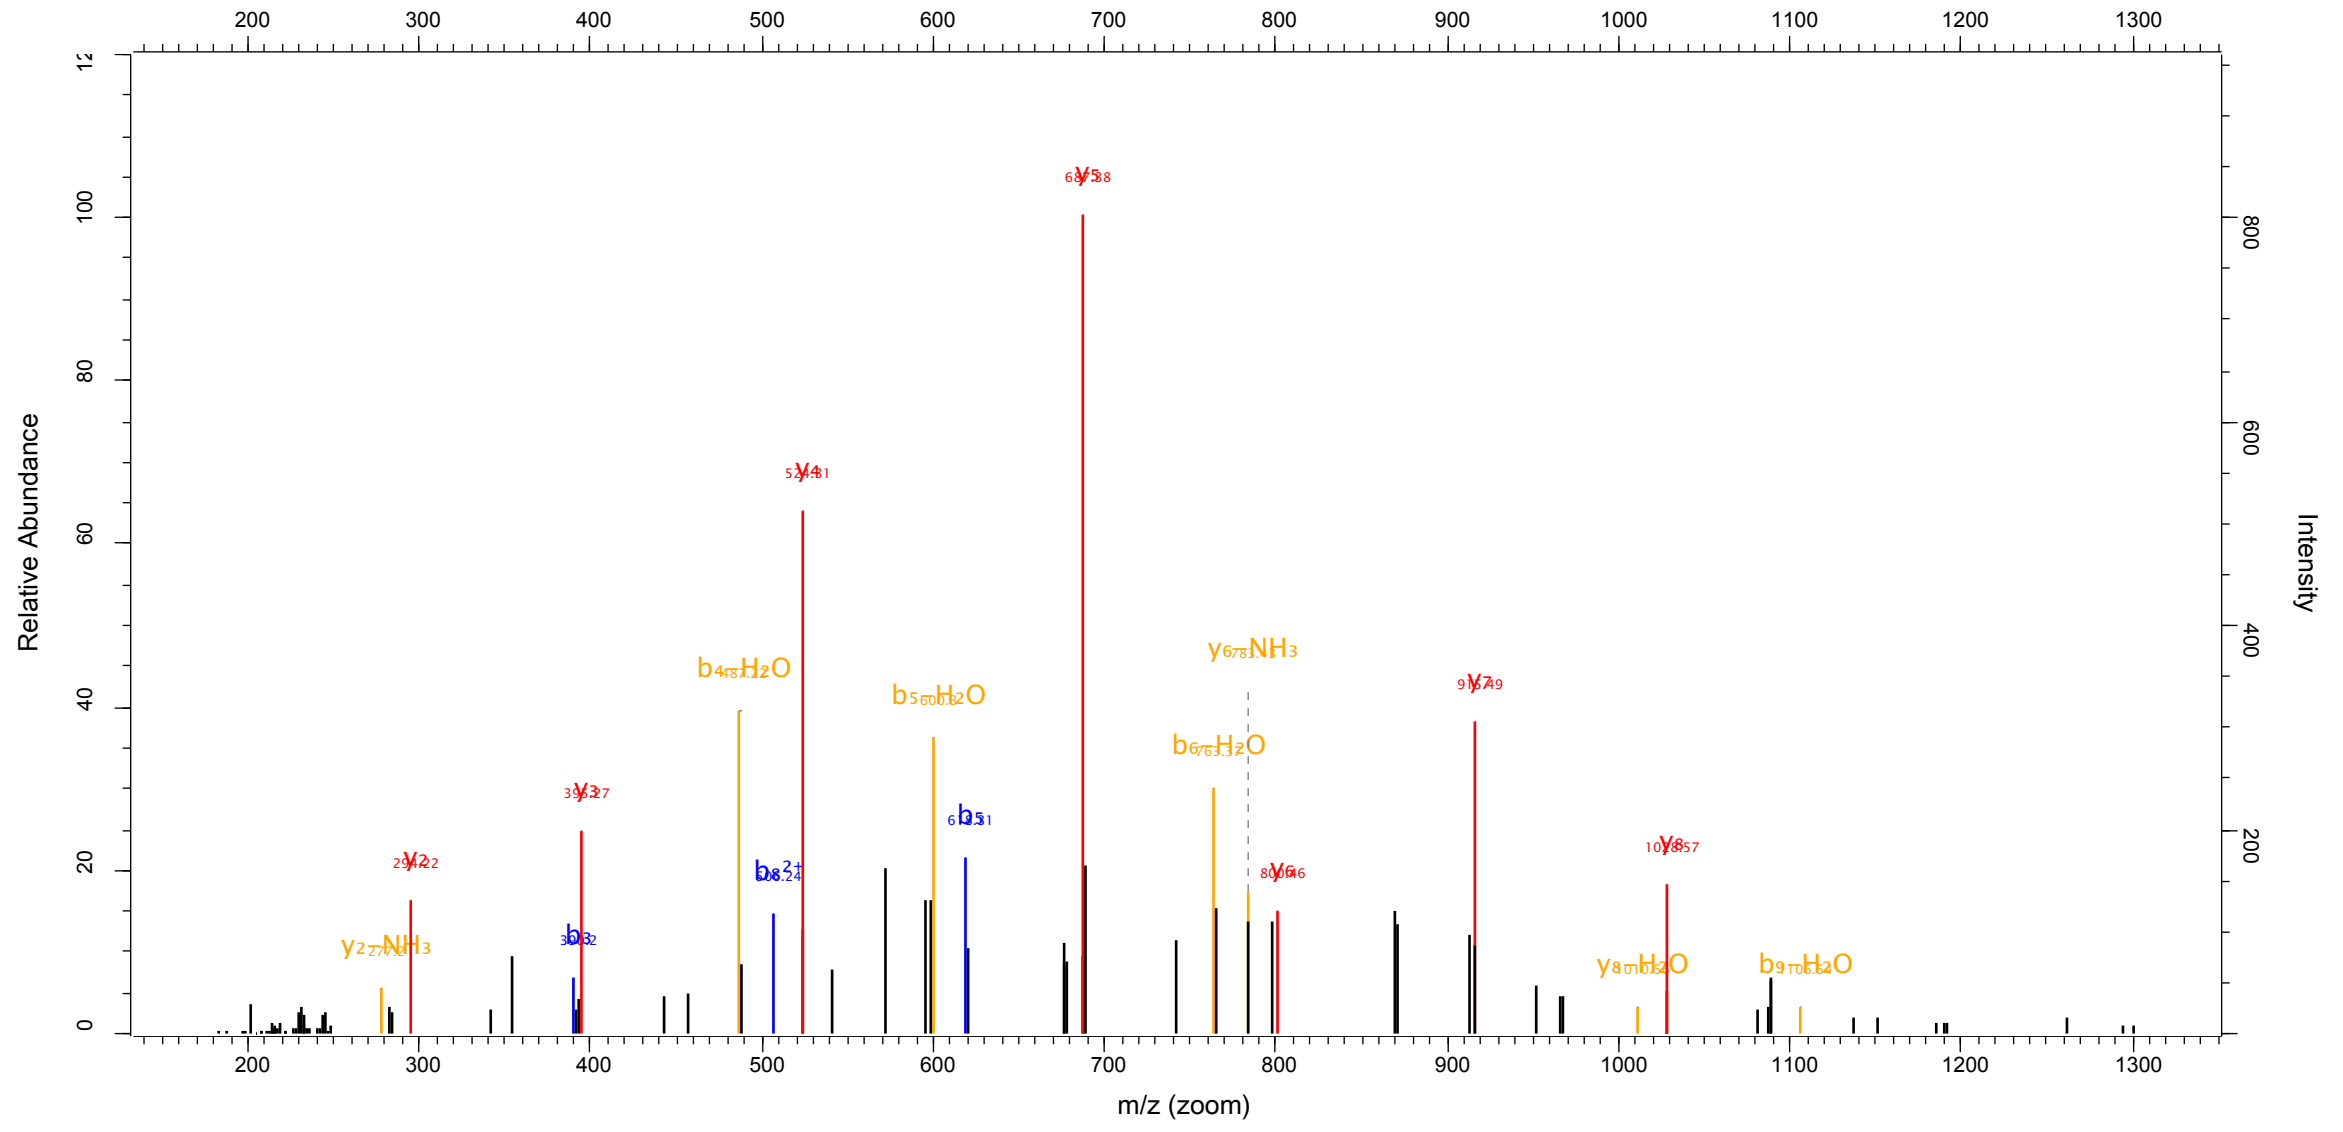

Scan number 26107 Raw file nak\_ubx4HeavySAX6\_11nov11  
 Method ITMS; CID Pepti... 182.82

Protein Group 2359

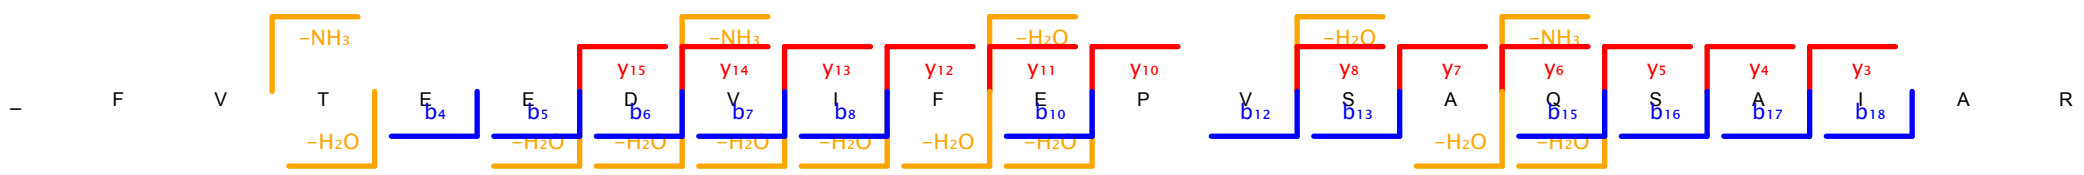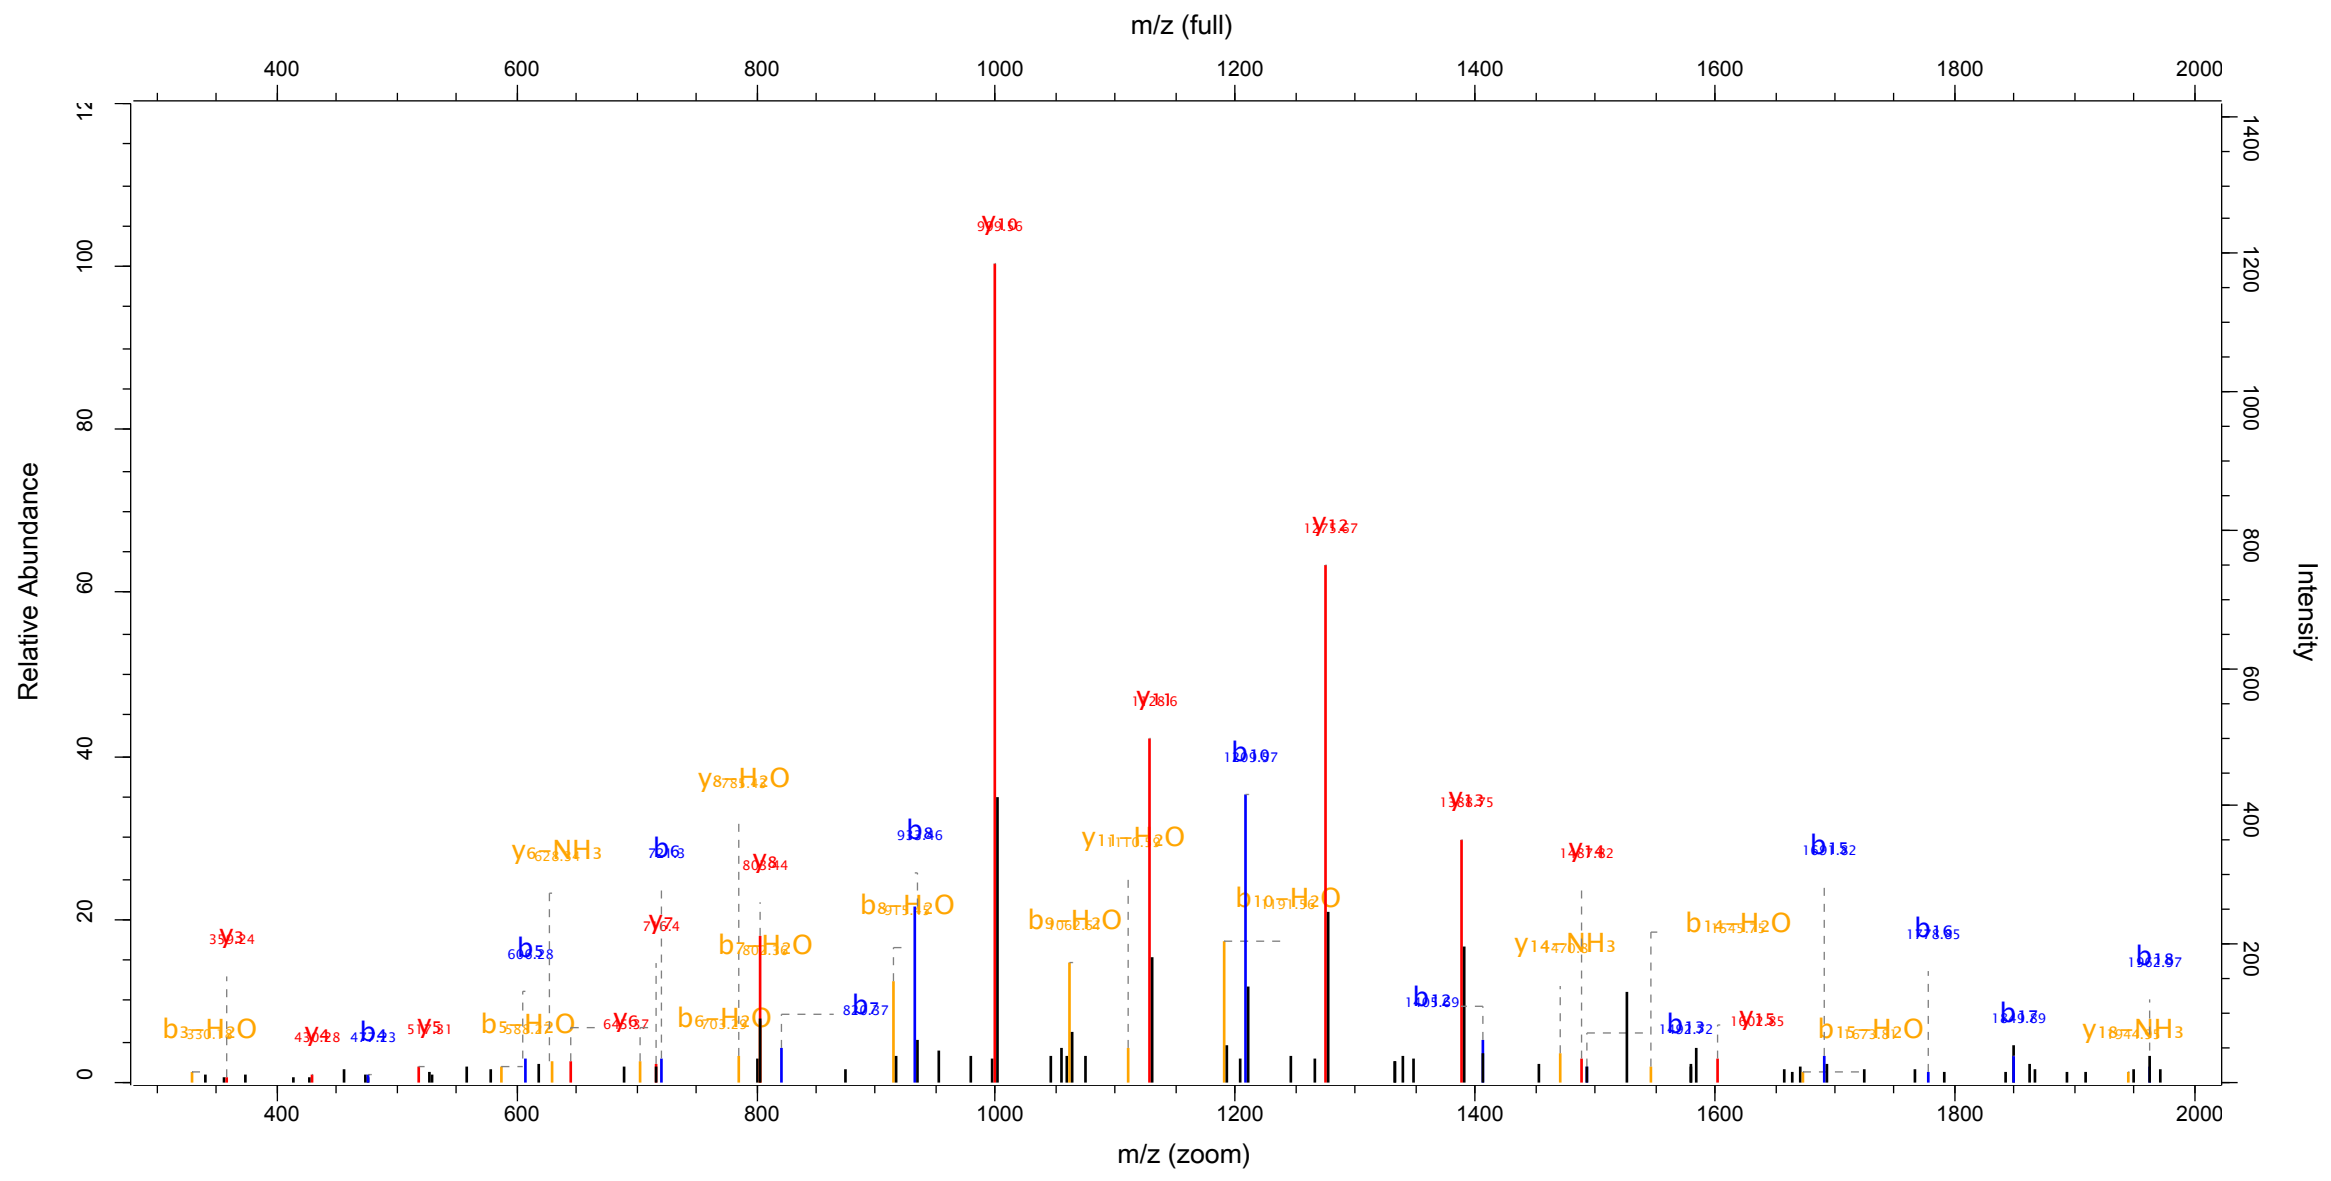



Scan number  
Method

9181  
ITMS; CID

Raw file  
Pepti...

nak\_UBX2HSAX6\_8feb11\_10  
130.01

Protein Group 2362

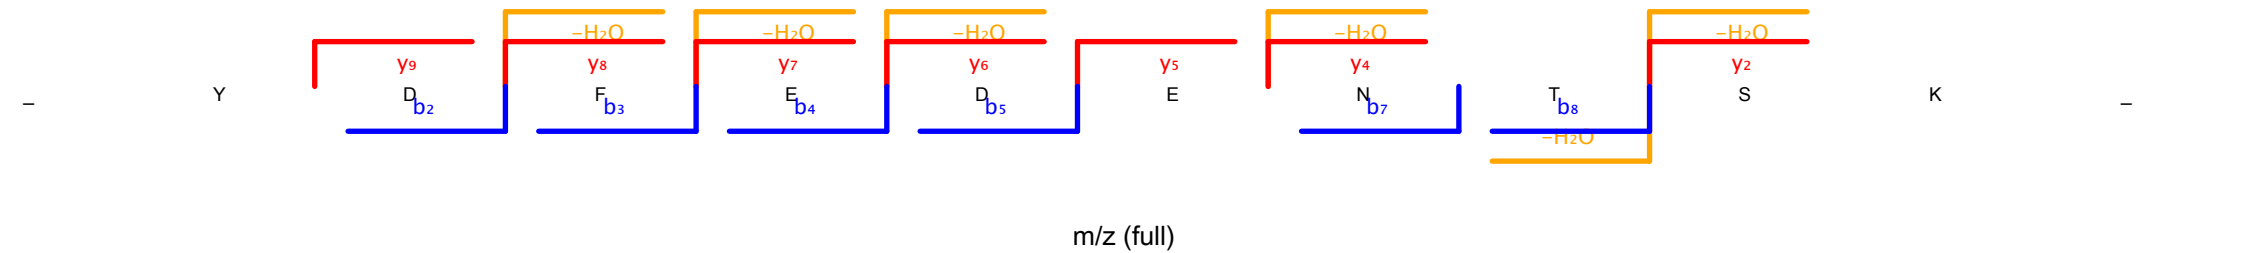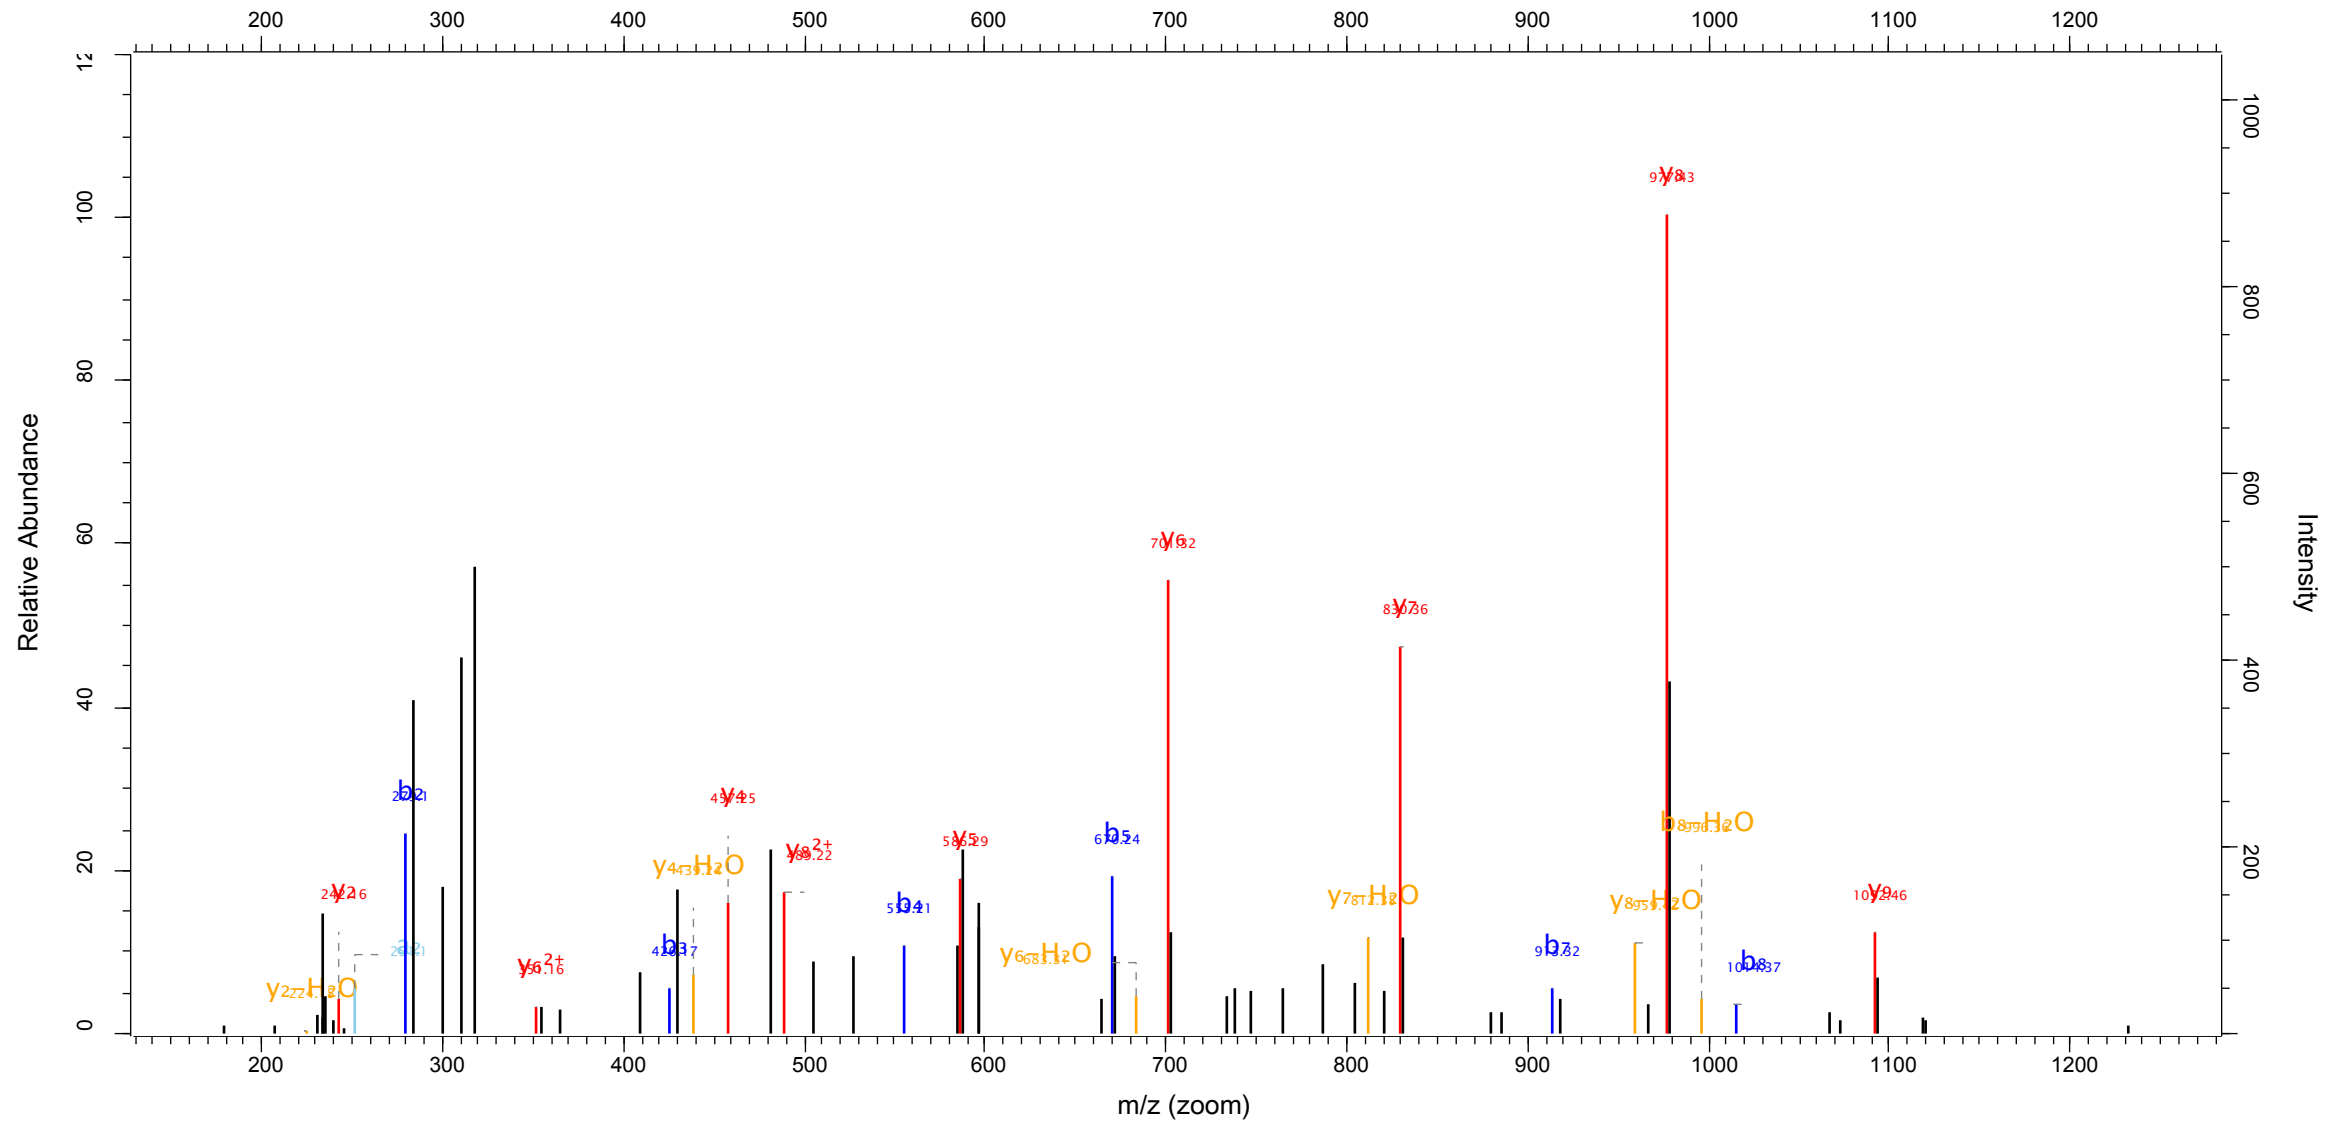

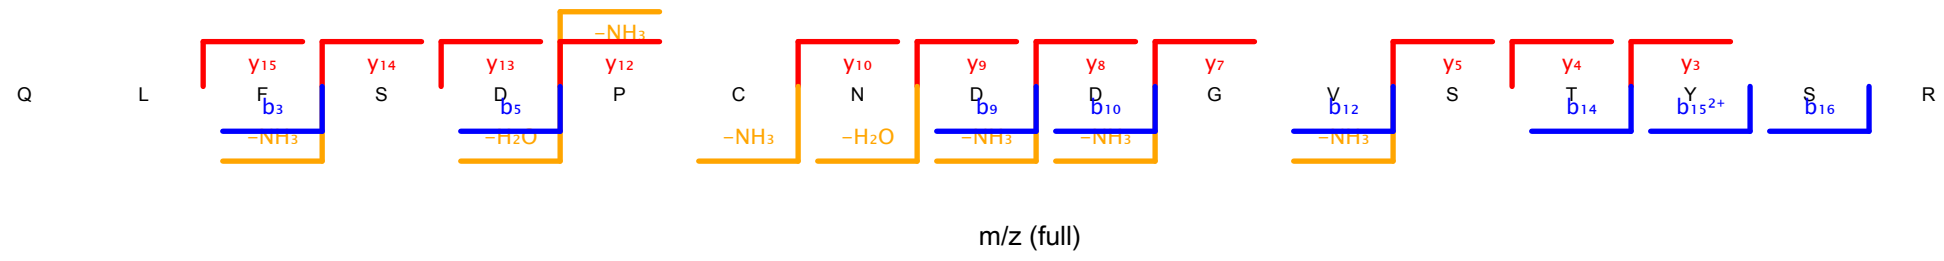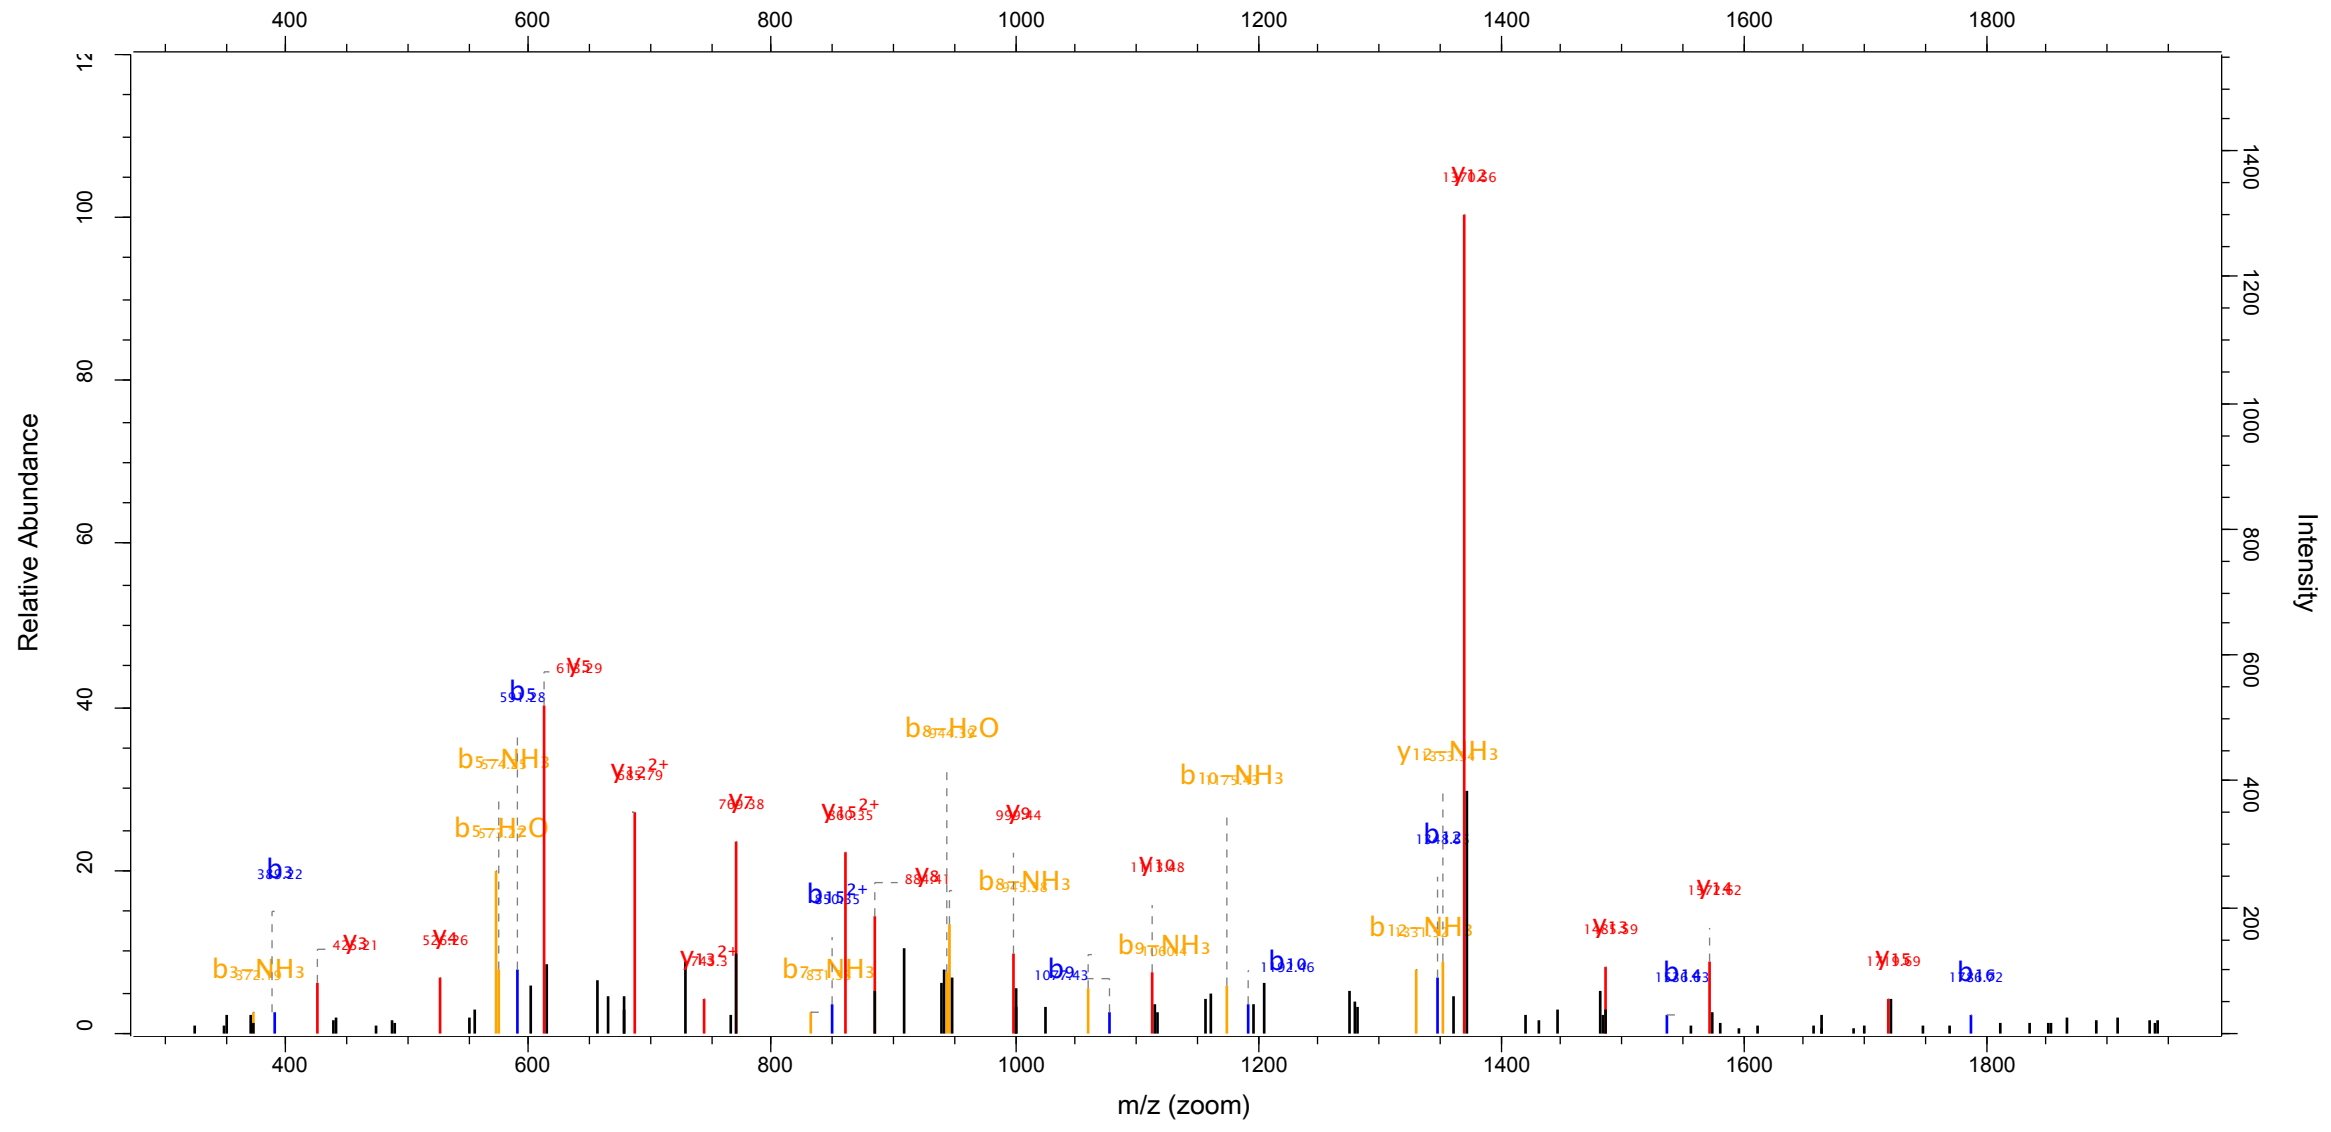

Scan number  
Method

6273  
ITMS; CID

Raw file  
Pepti...

nak\_ubx4HeavySAX6\_11nov11  
80.13

Protein Group 2426

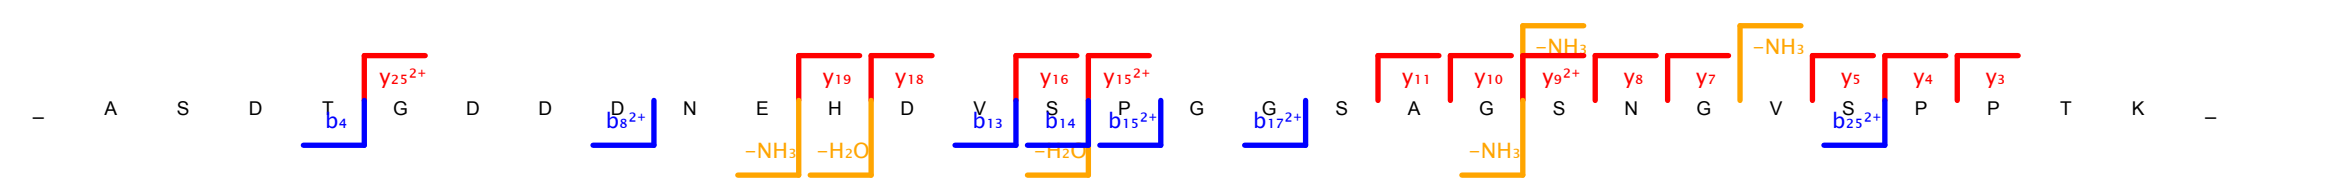

m/z (full)

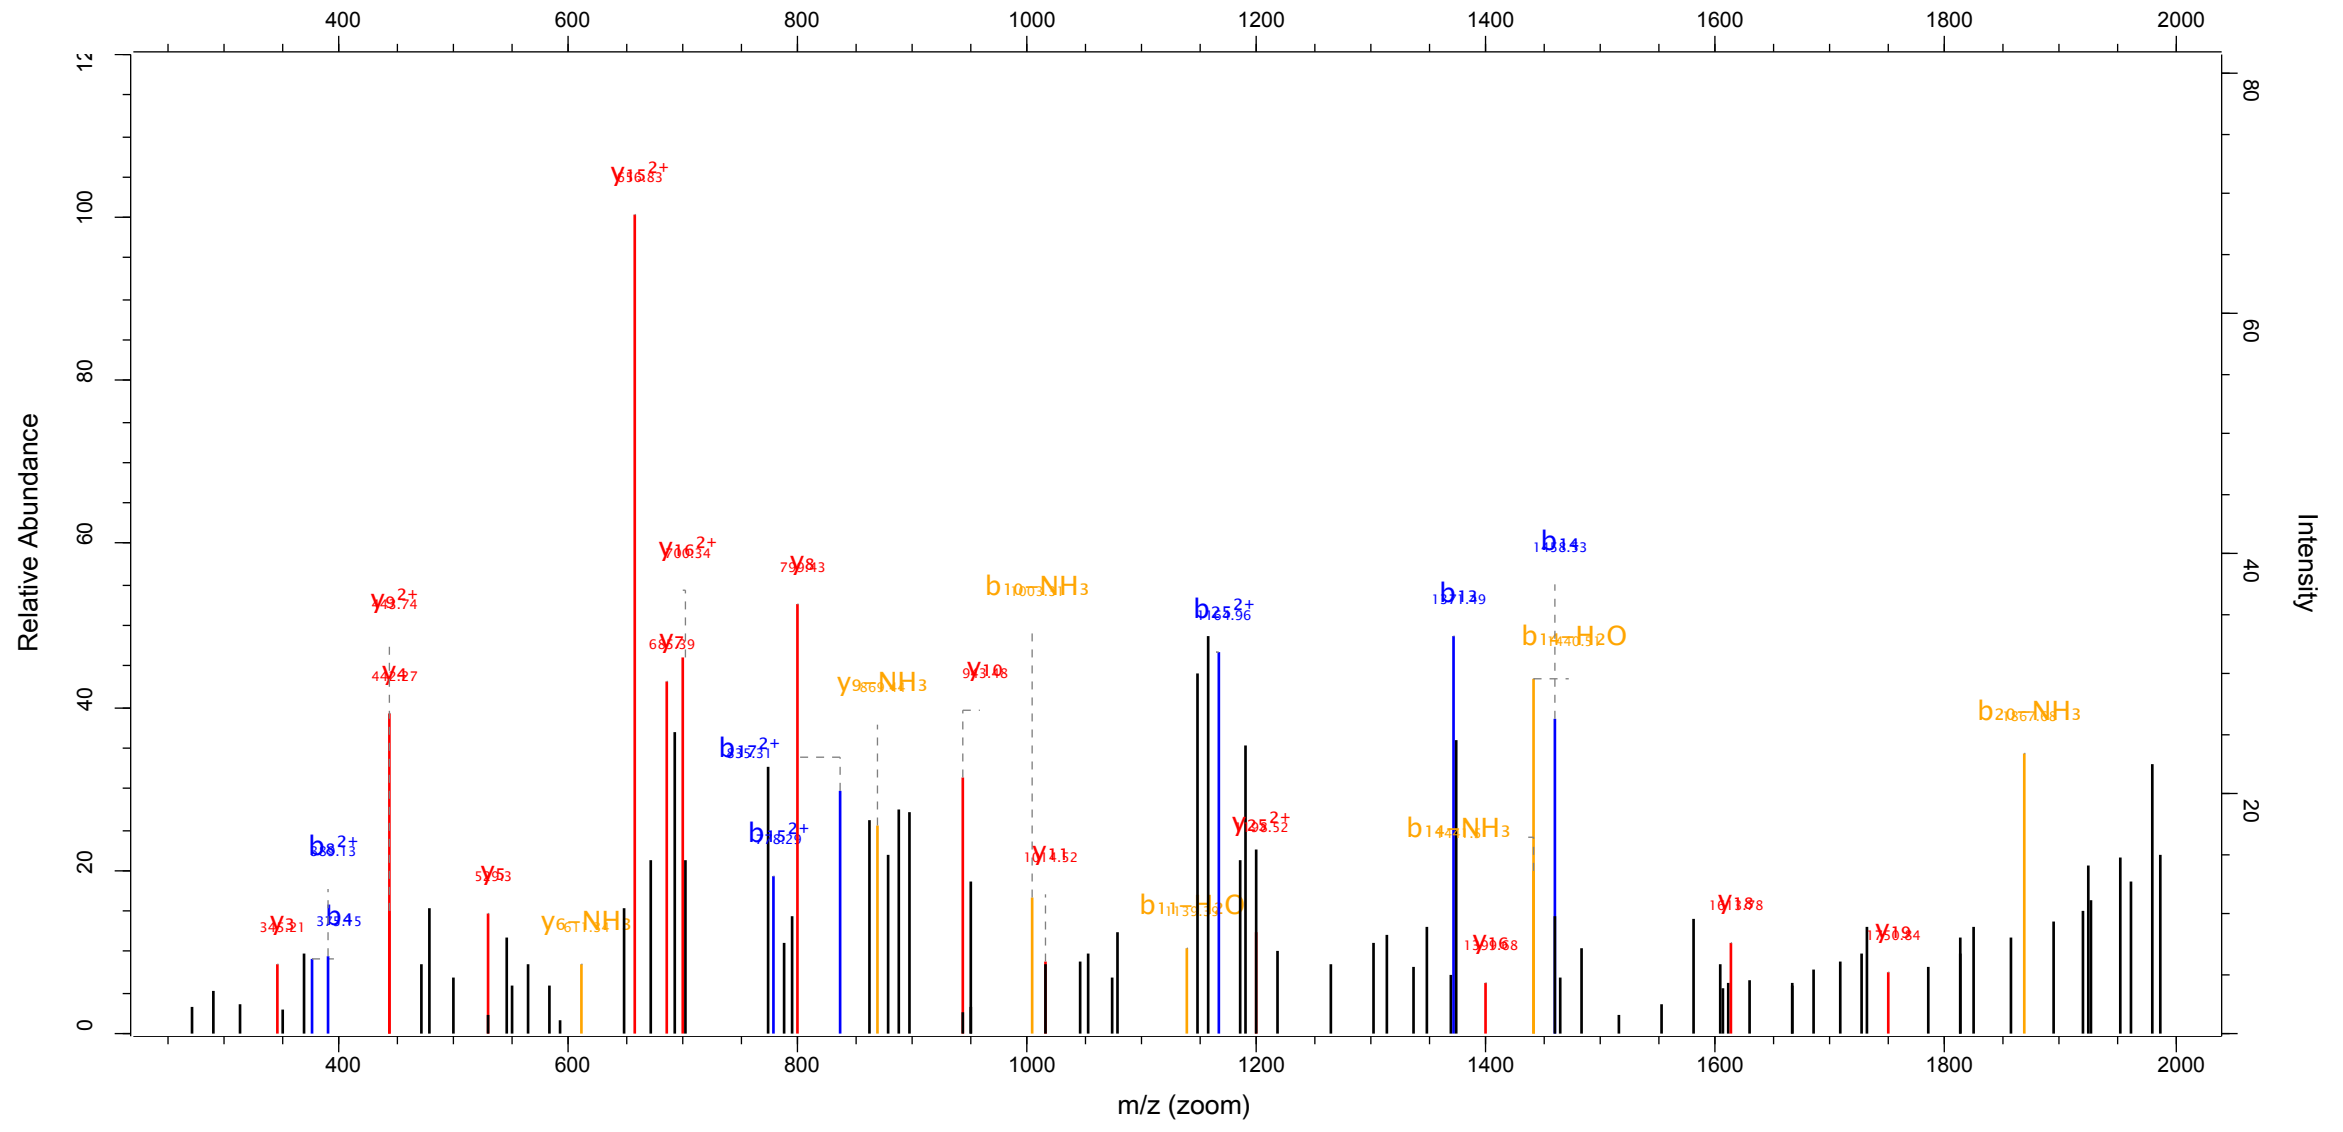

Scan number  
Method

29108  
ITMS; CID

Raw file  
Pepti...

nak\_cdc48UbconjugatesSAX4\_21may15  
119.27

Protein Group 2445

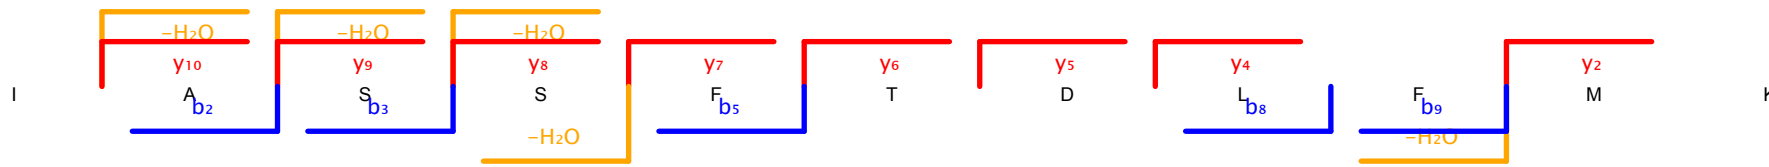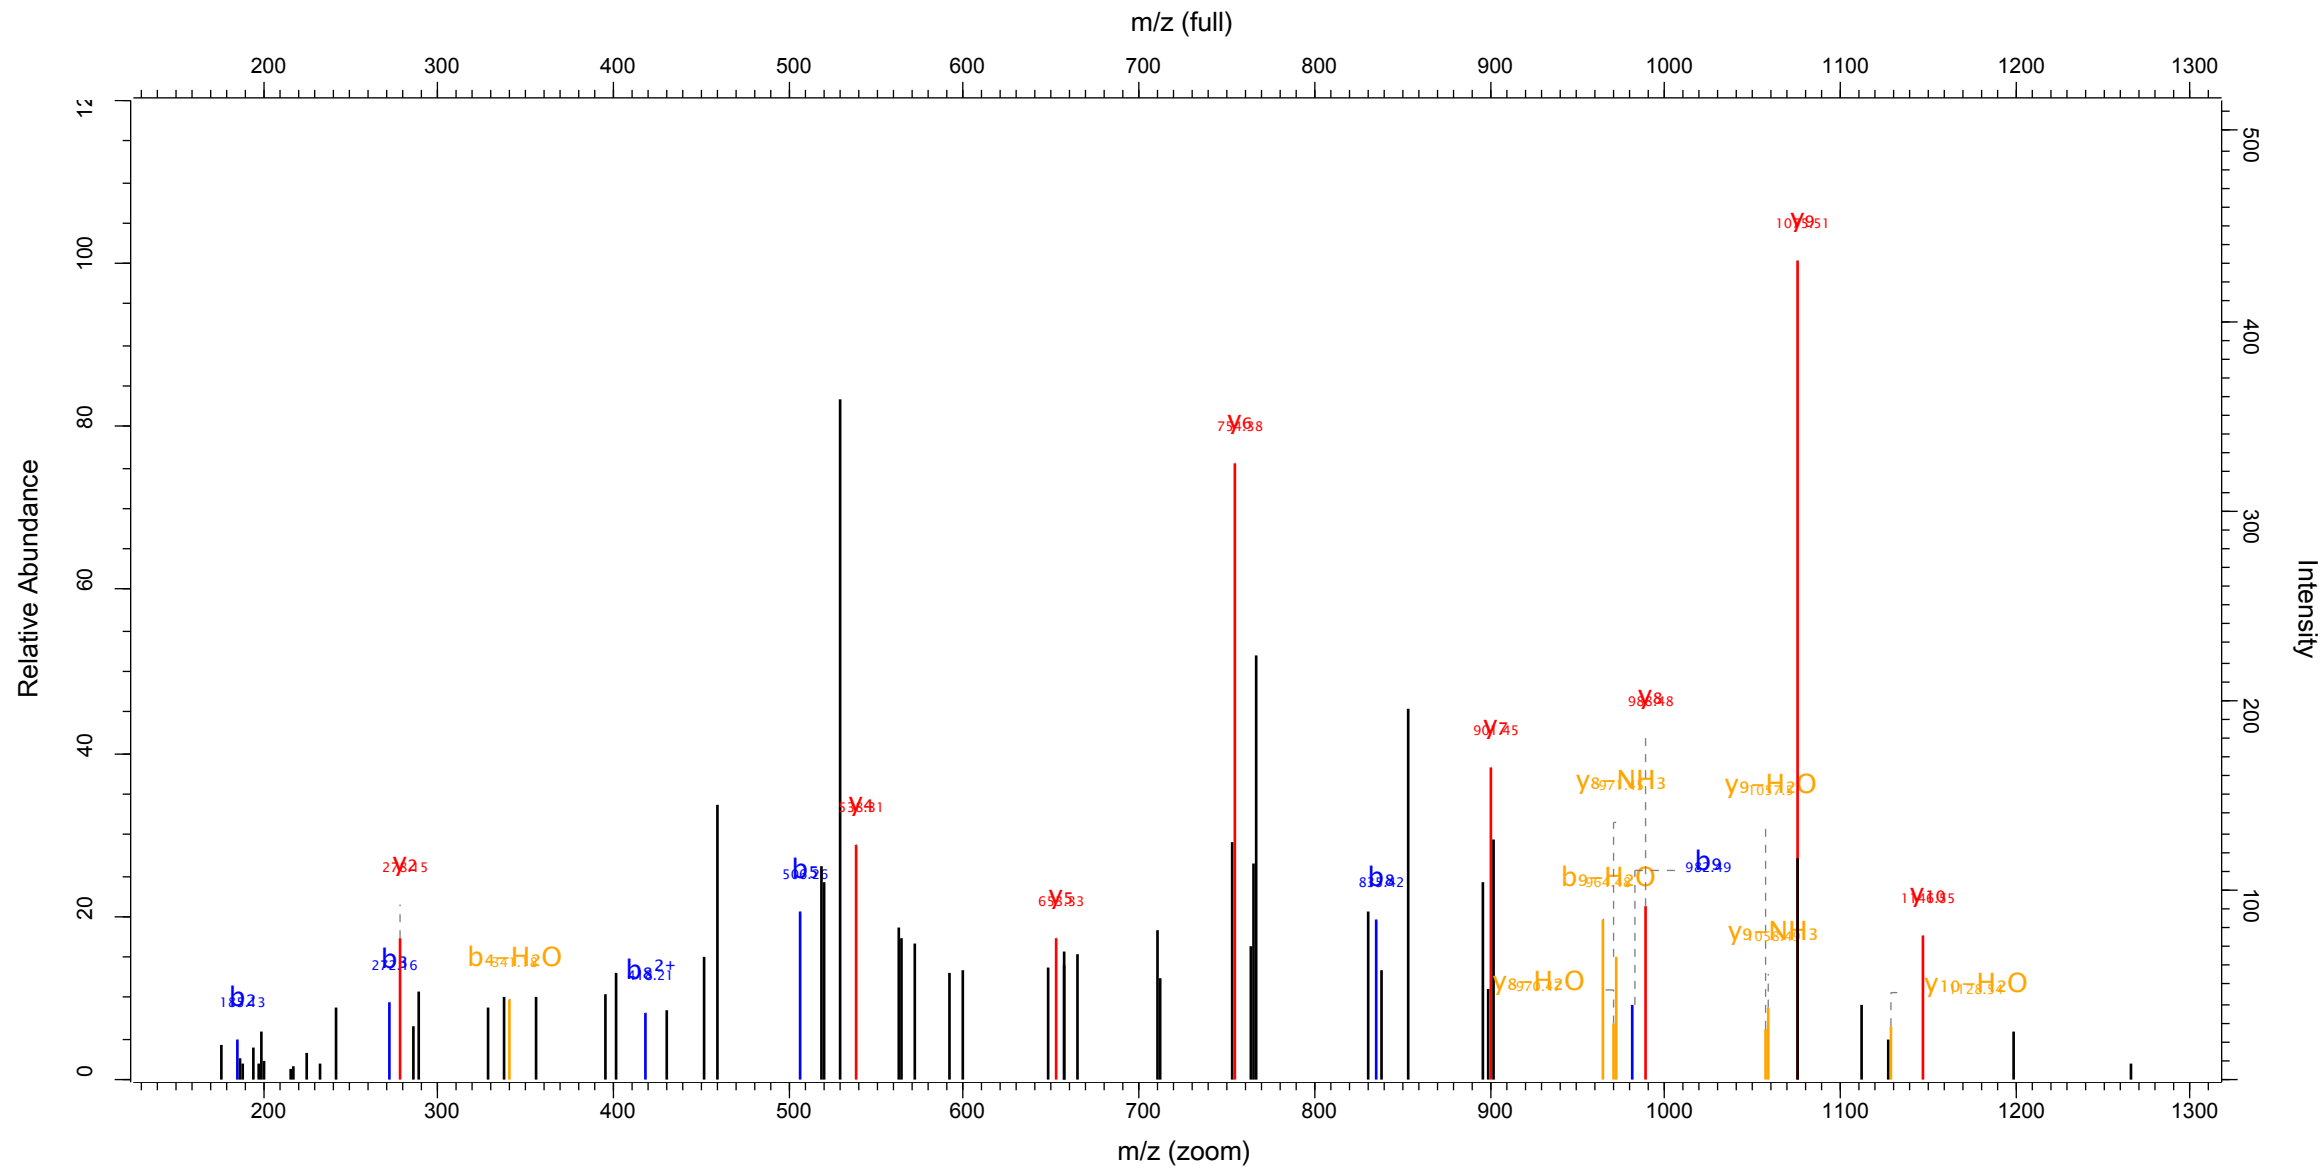

Scan number  
Method

24193  
ITMS; CID

Raw file  
Pepti...

nak\_UBX2HSAX3\_8feb11\_07  
177.78

Protein Group 2466

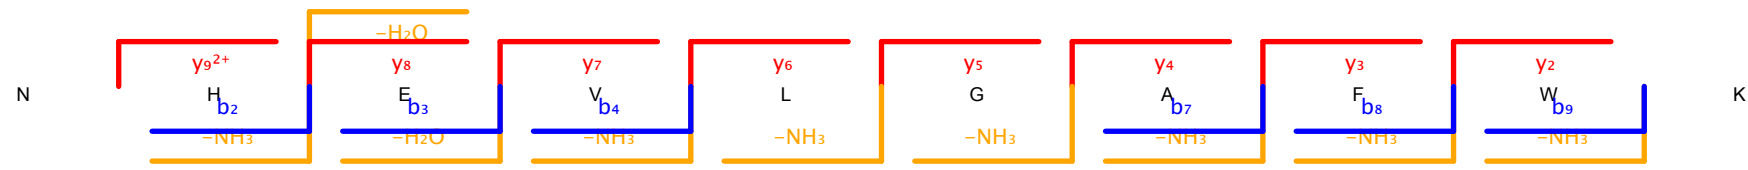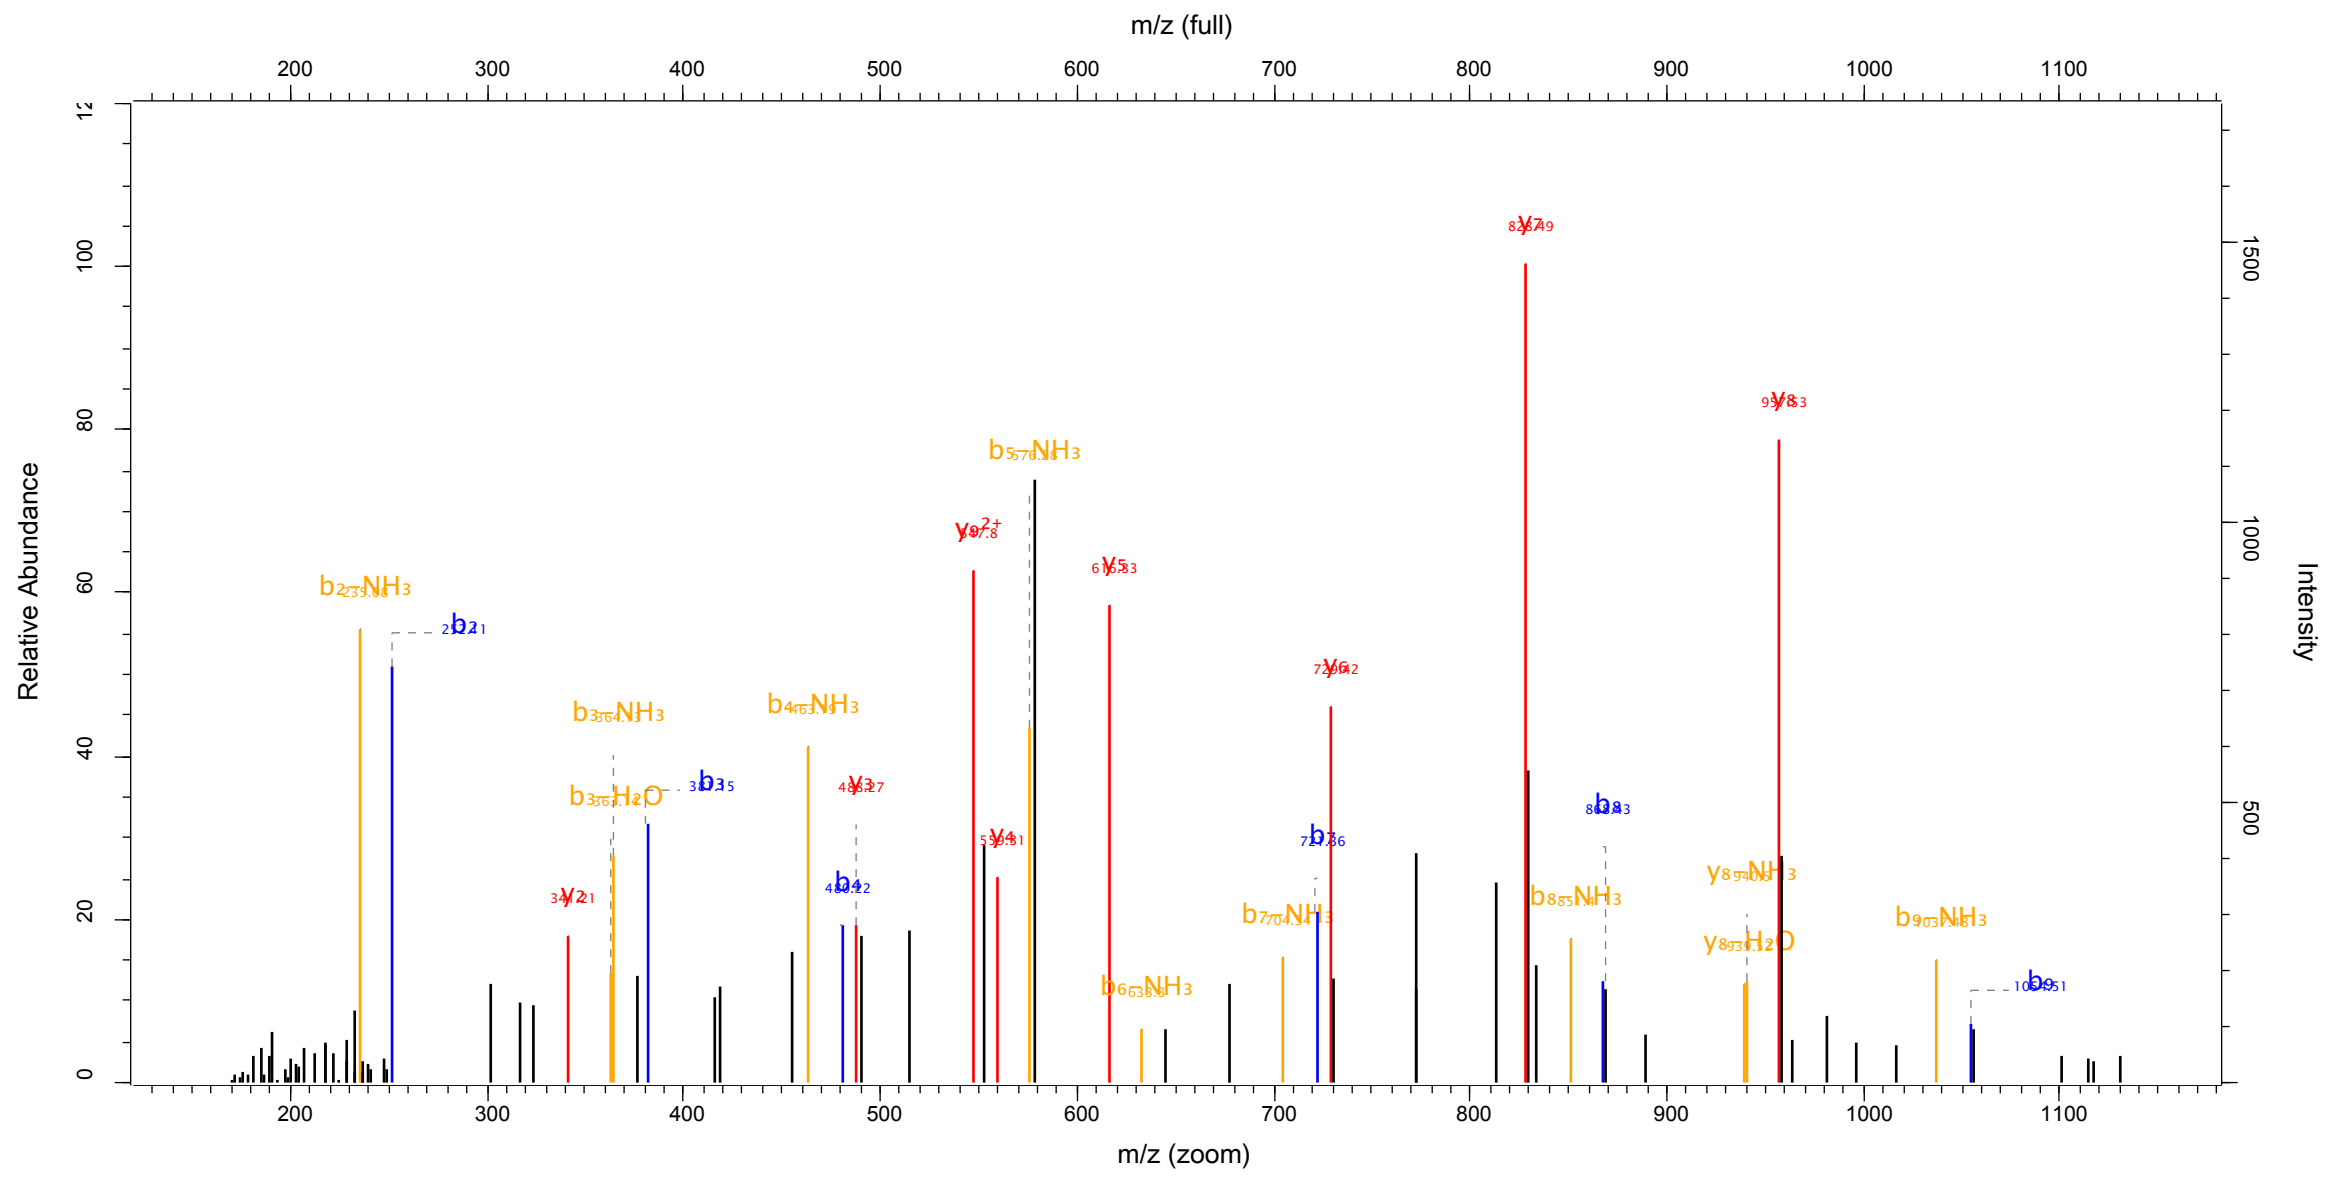

Scan number  
Method

15941  
ITMS; CID

Raw file  
Pepti...

nak\_UBX3LSAX5\_28jan11\_23  
115.68

Protein Group 2481

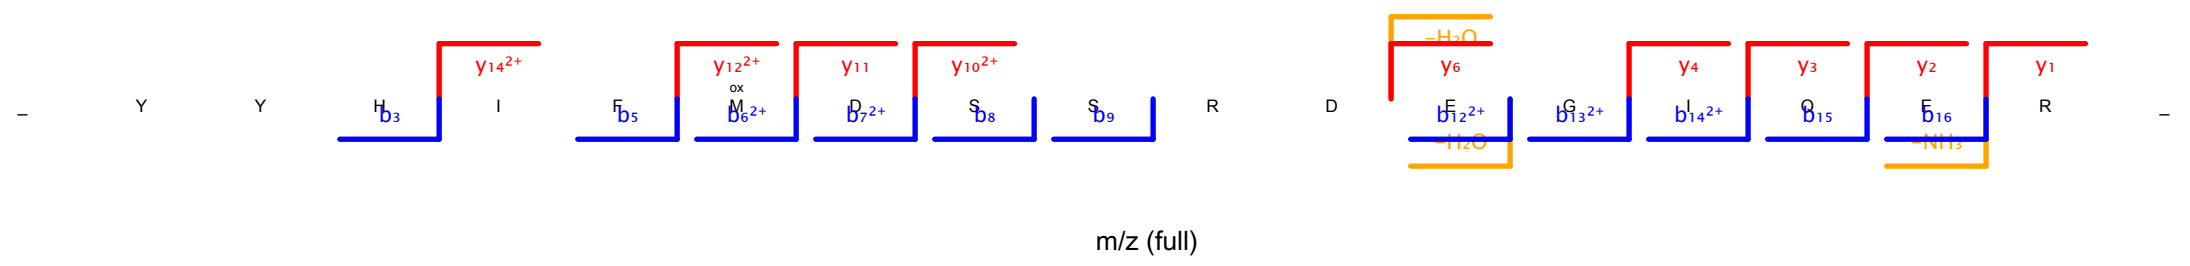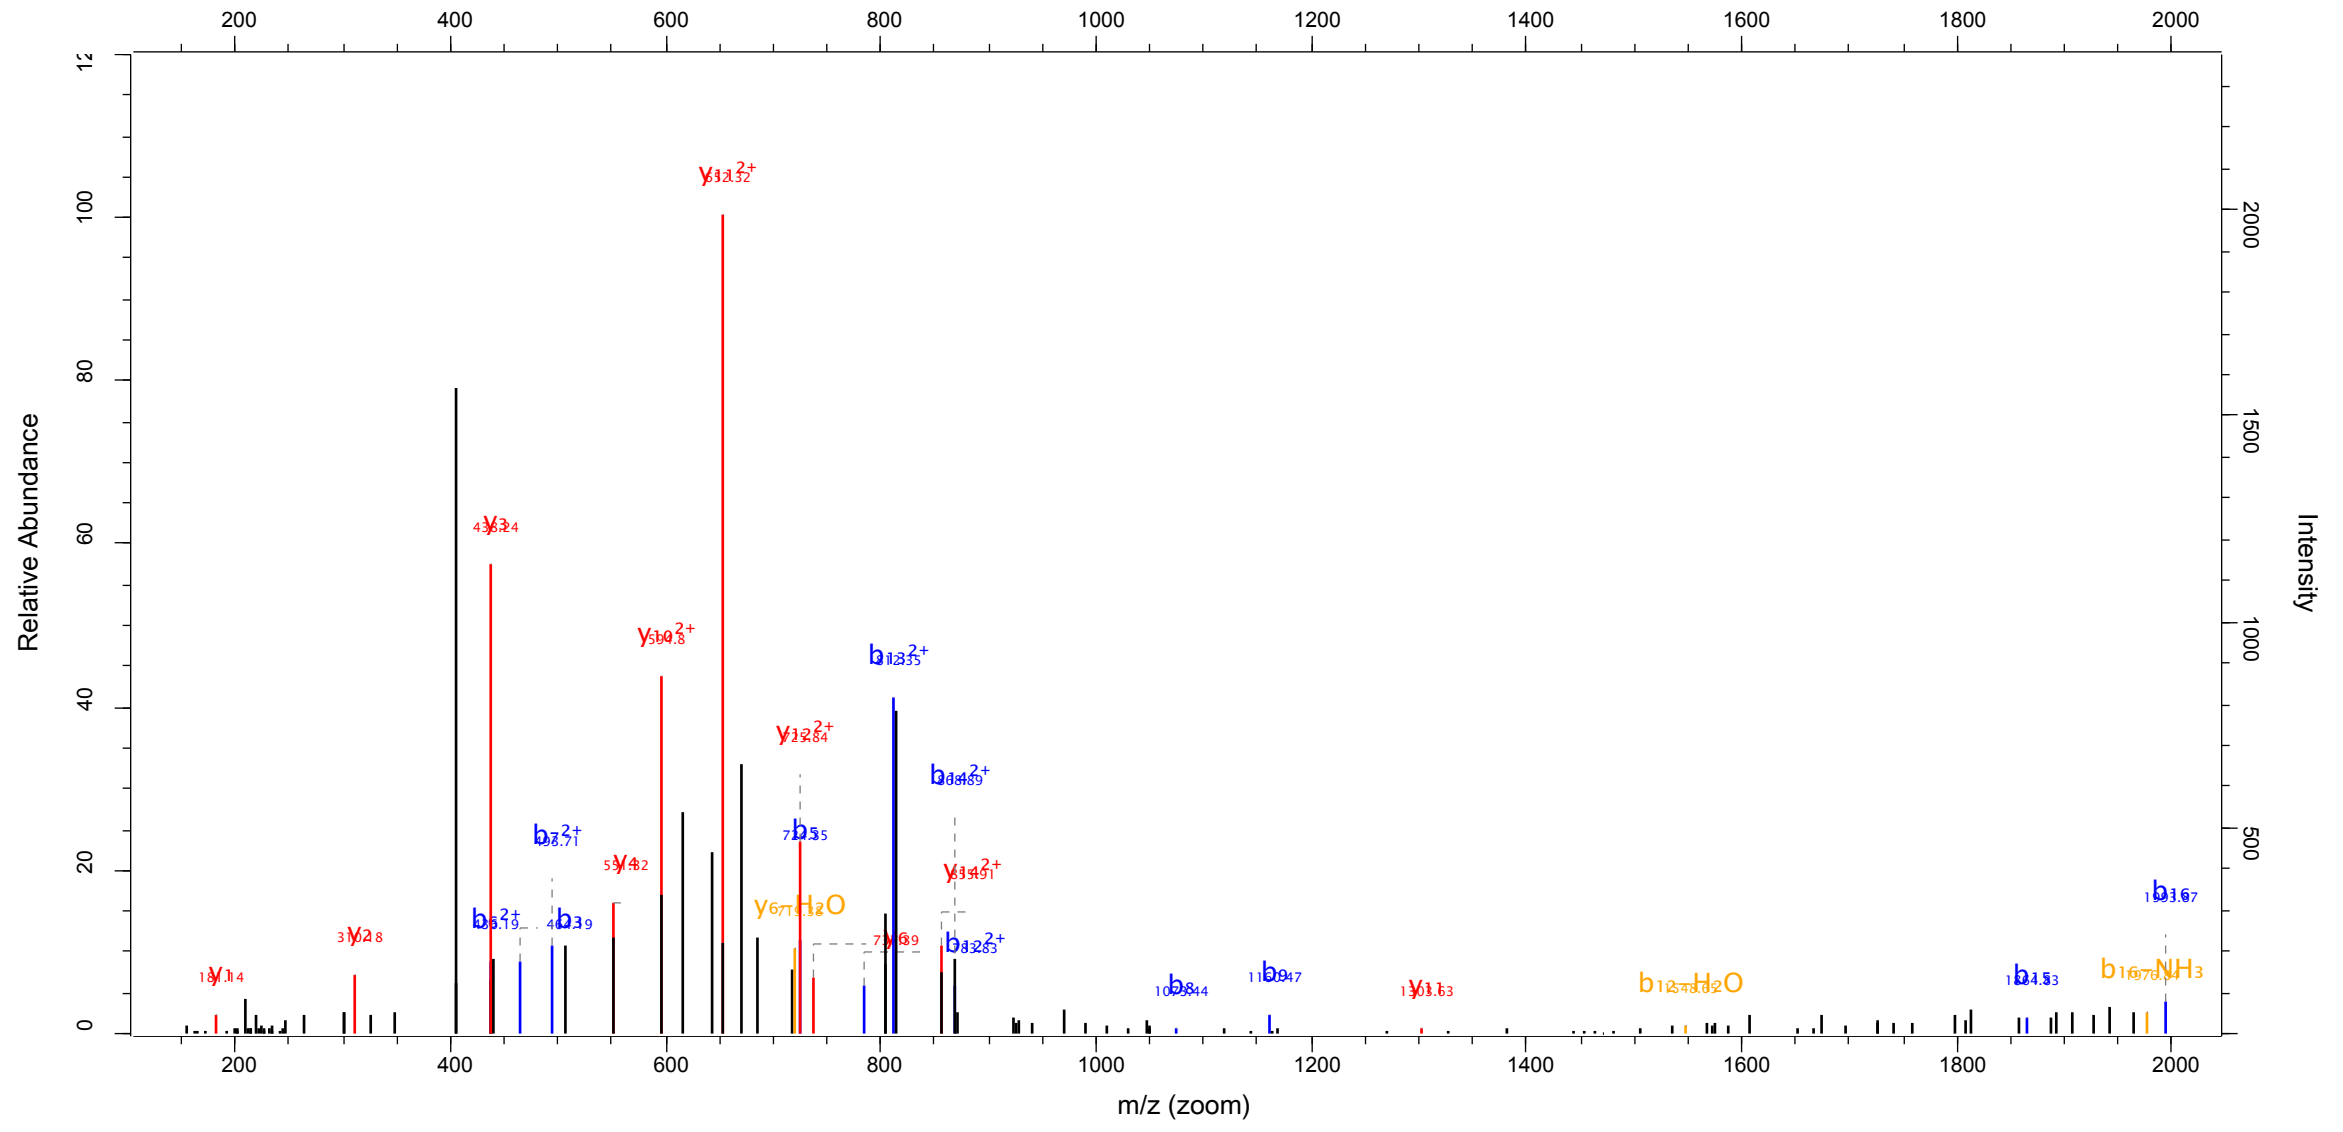

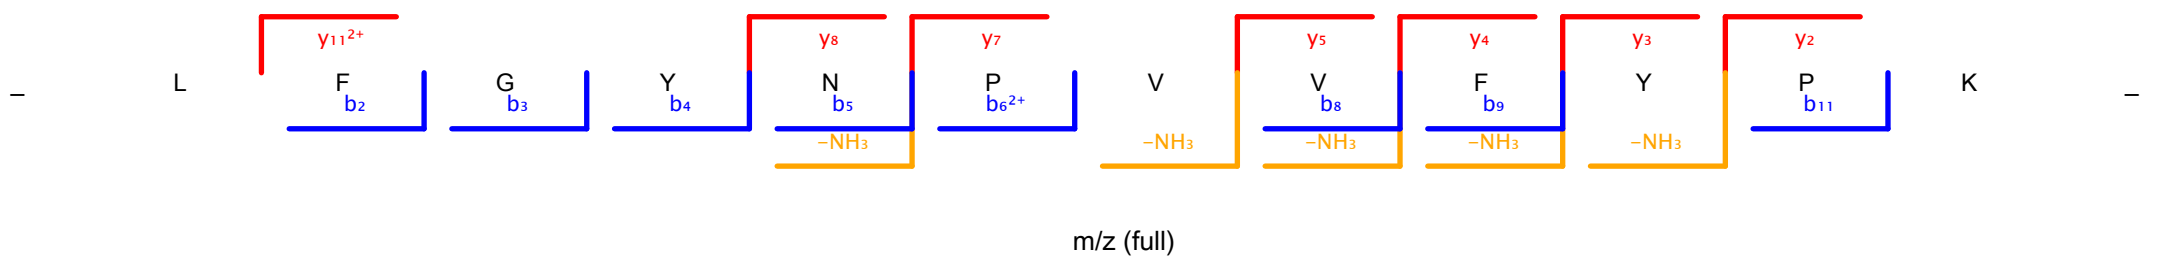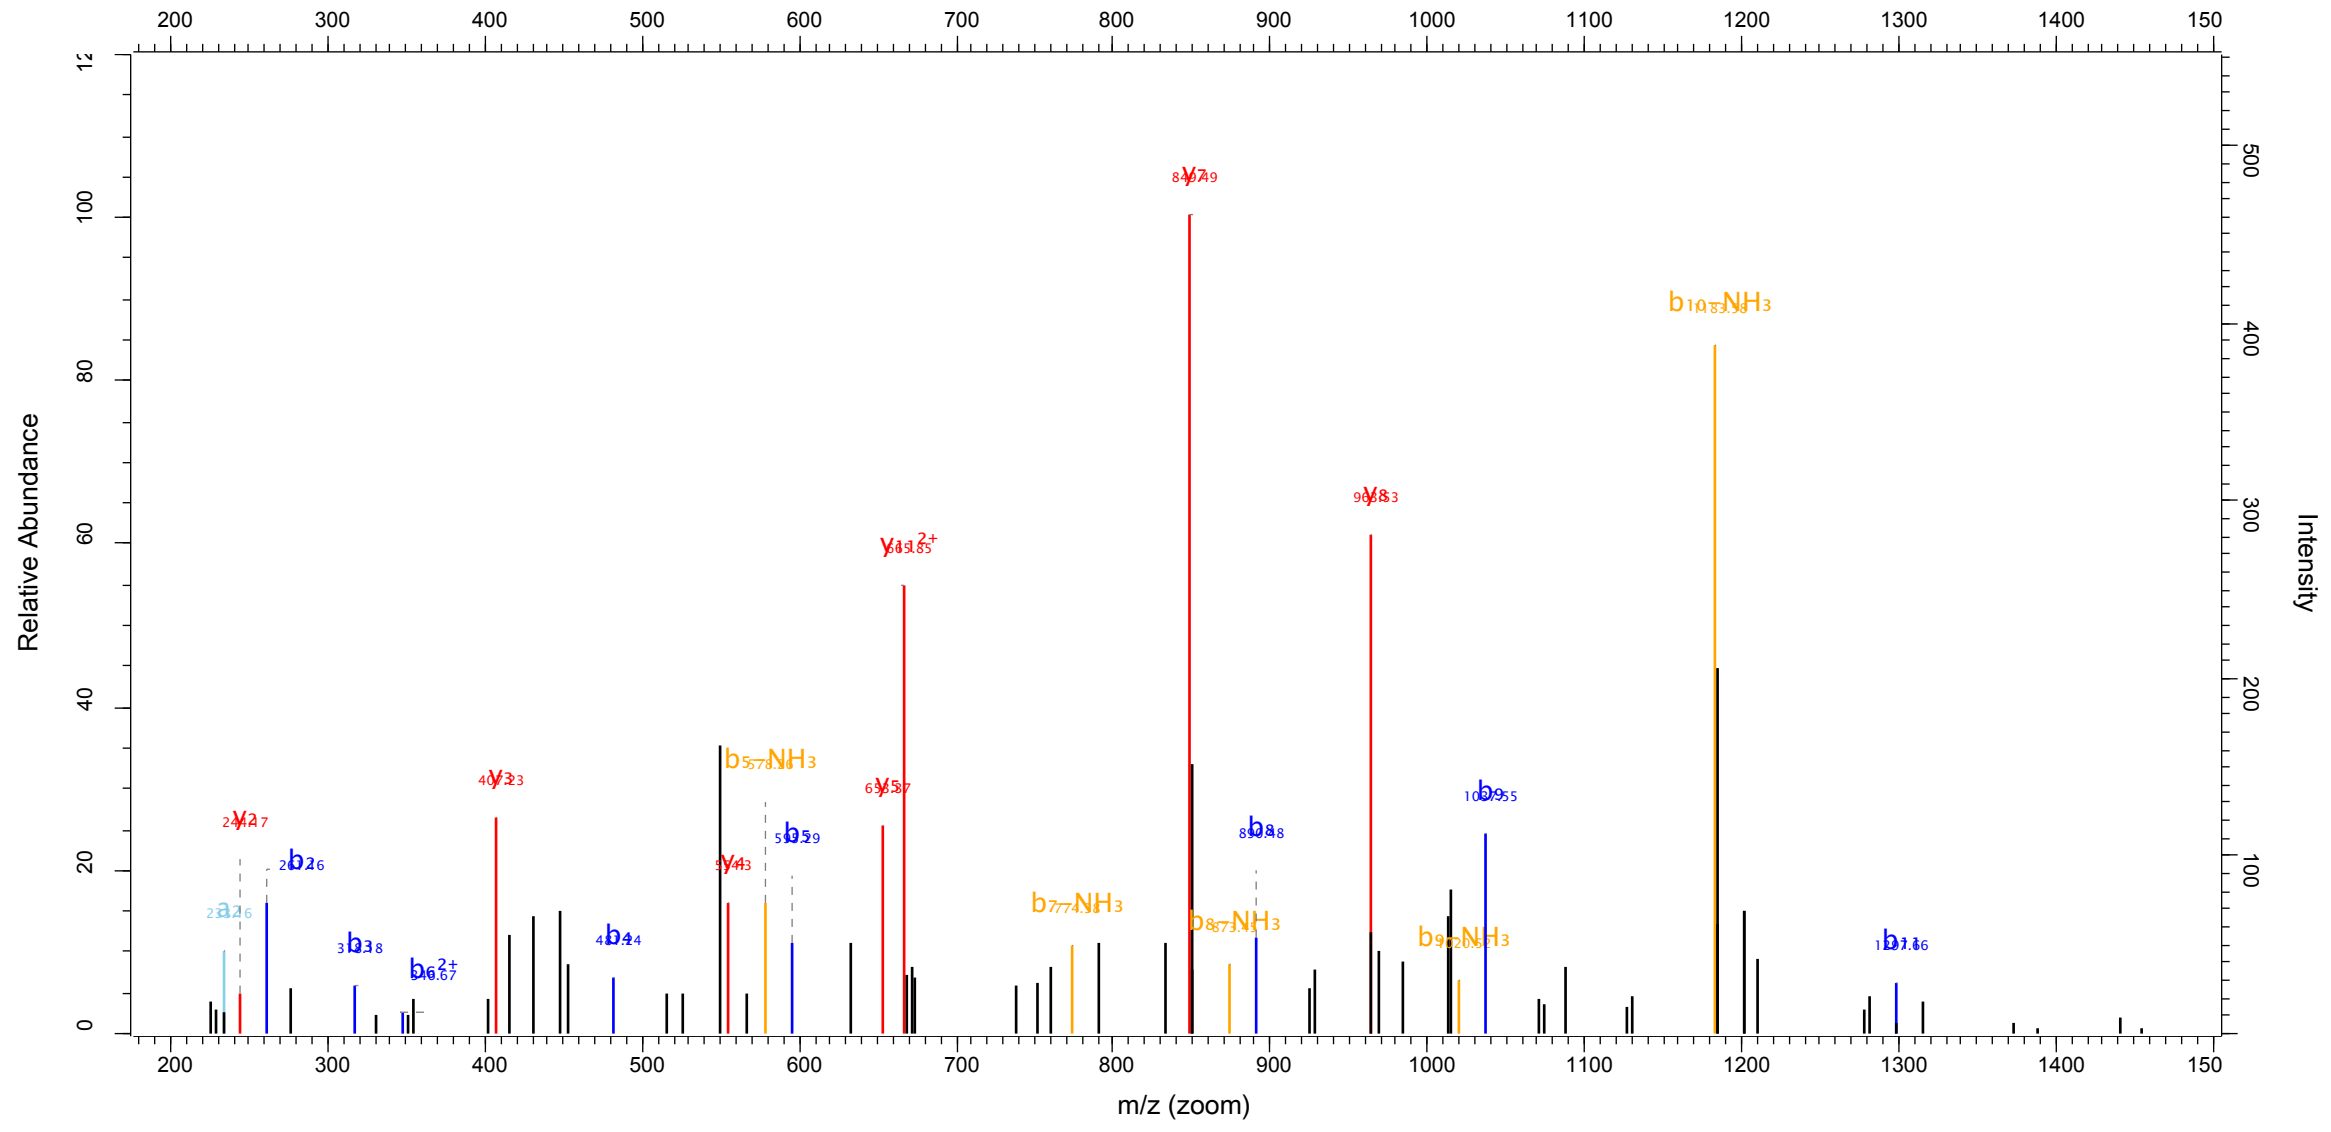

Scan number  
Method

1500  
ITMS; CID

Raw file  
Pepti...

nak\_UBX3HSAX5\_28jan11\_31  
99.57

Protein Group 2565

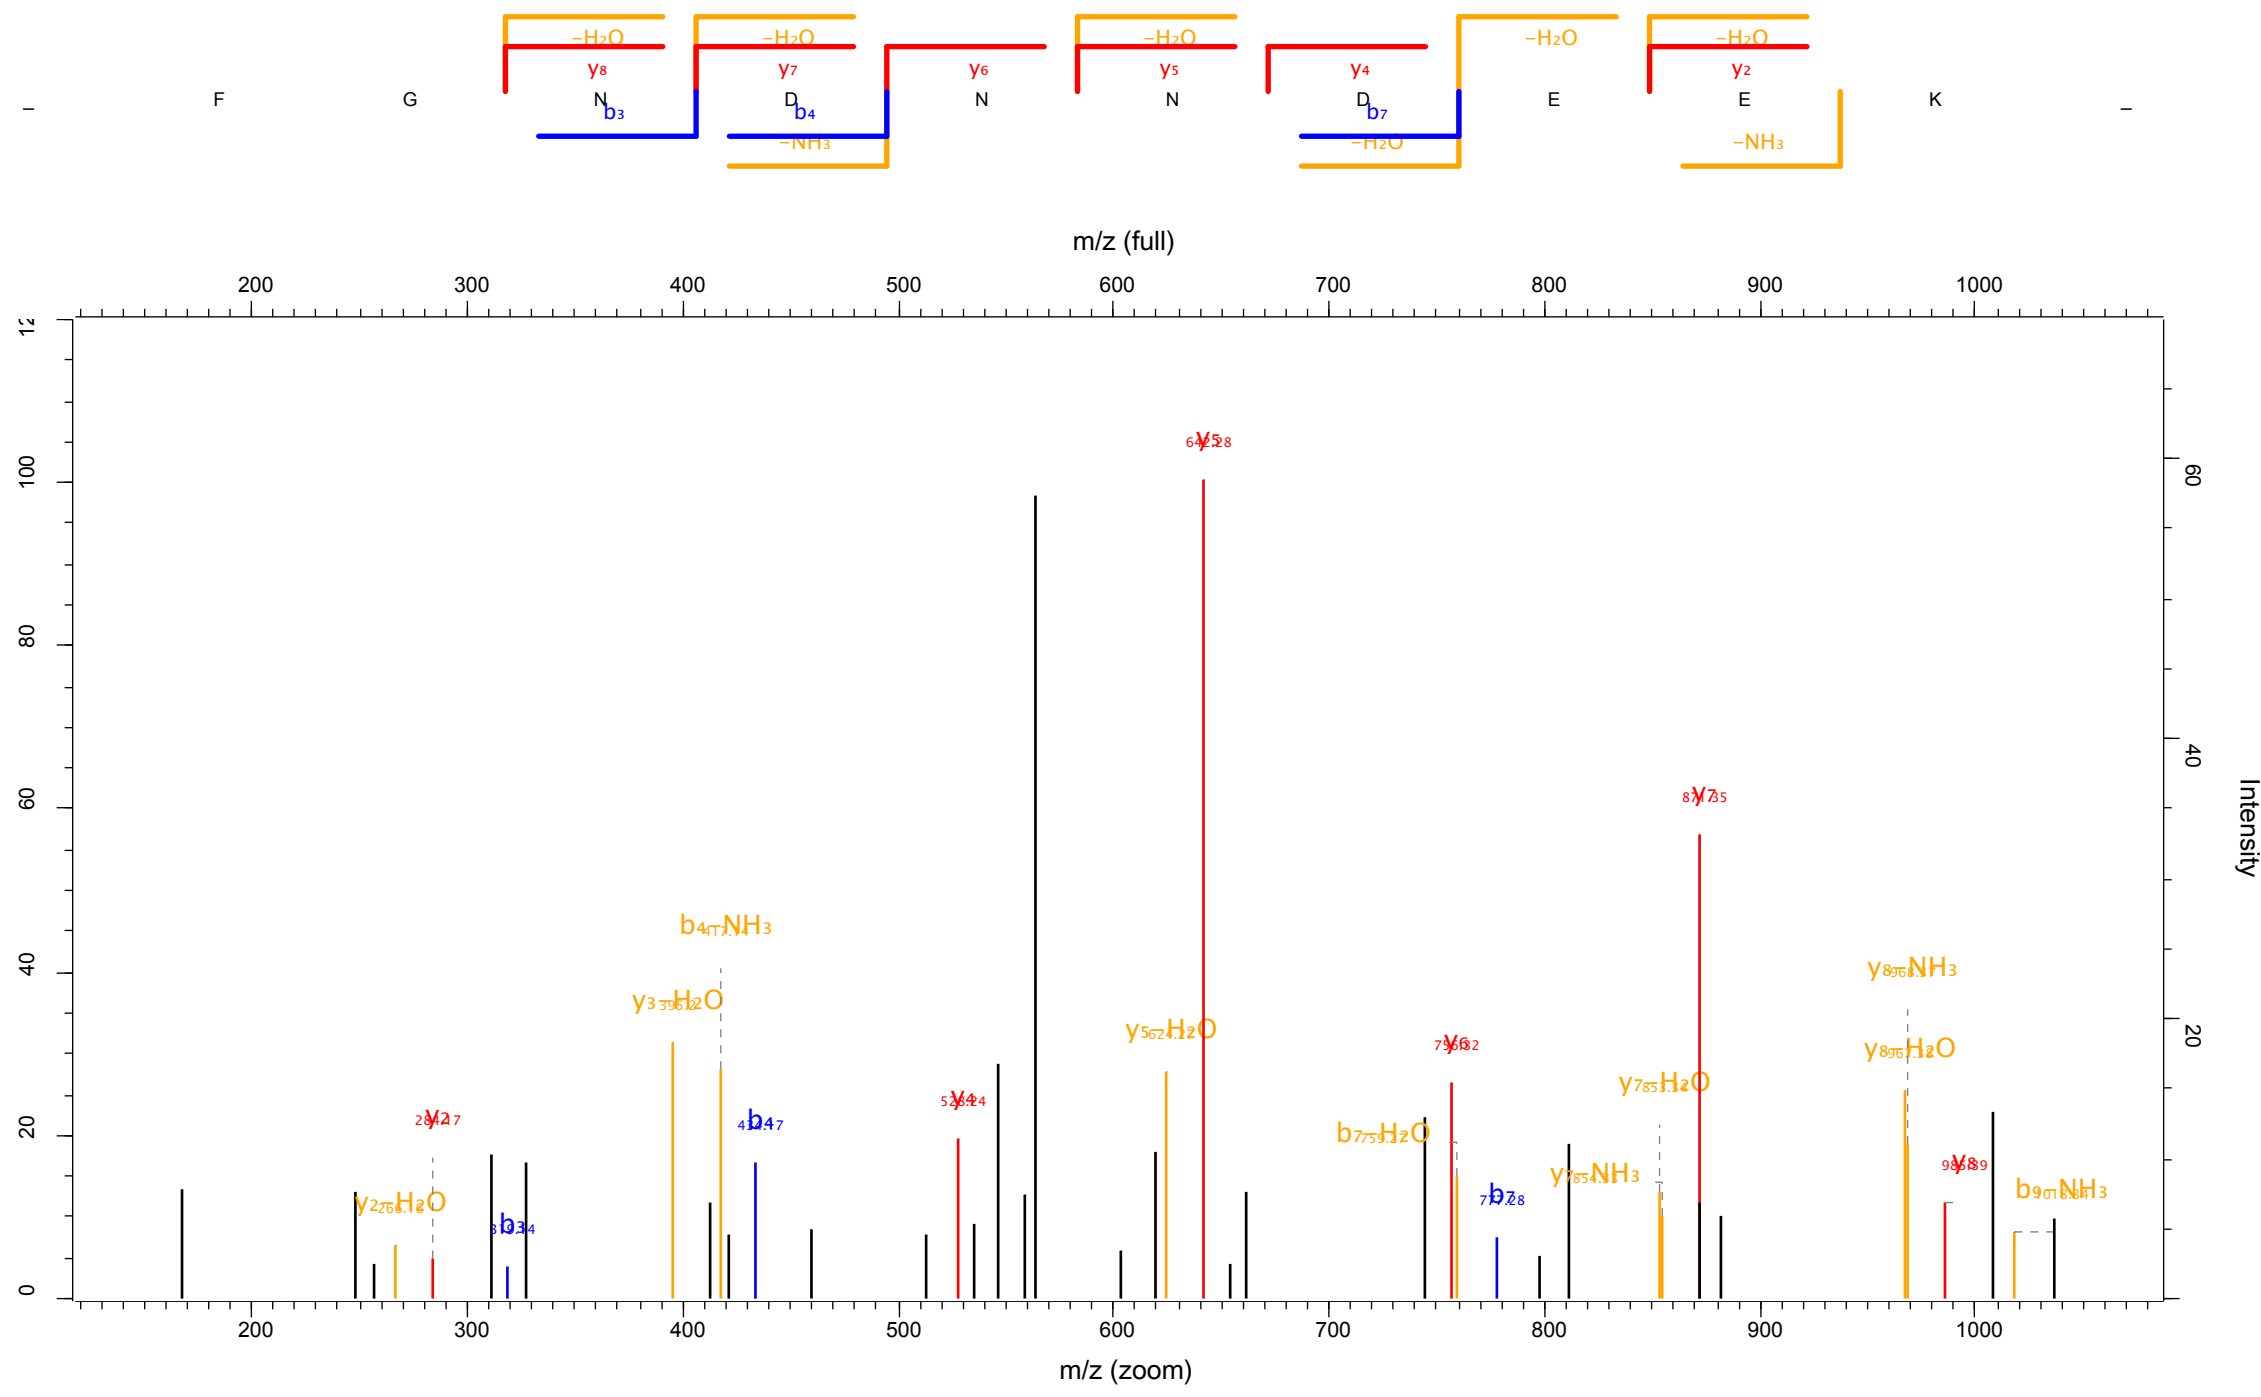



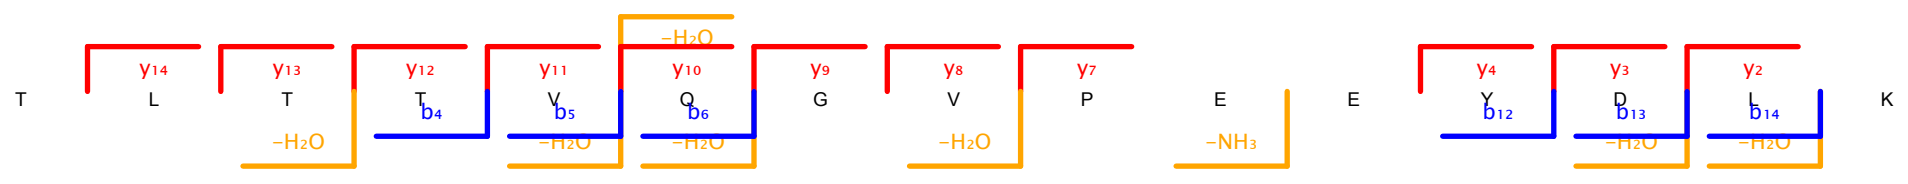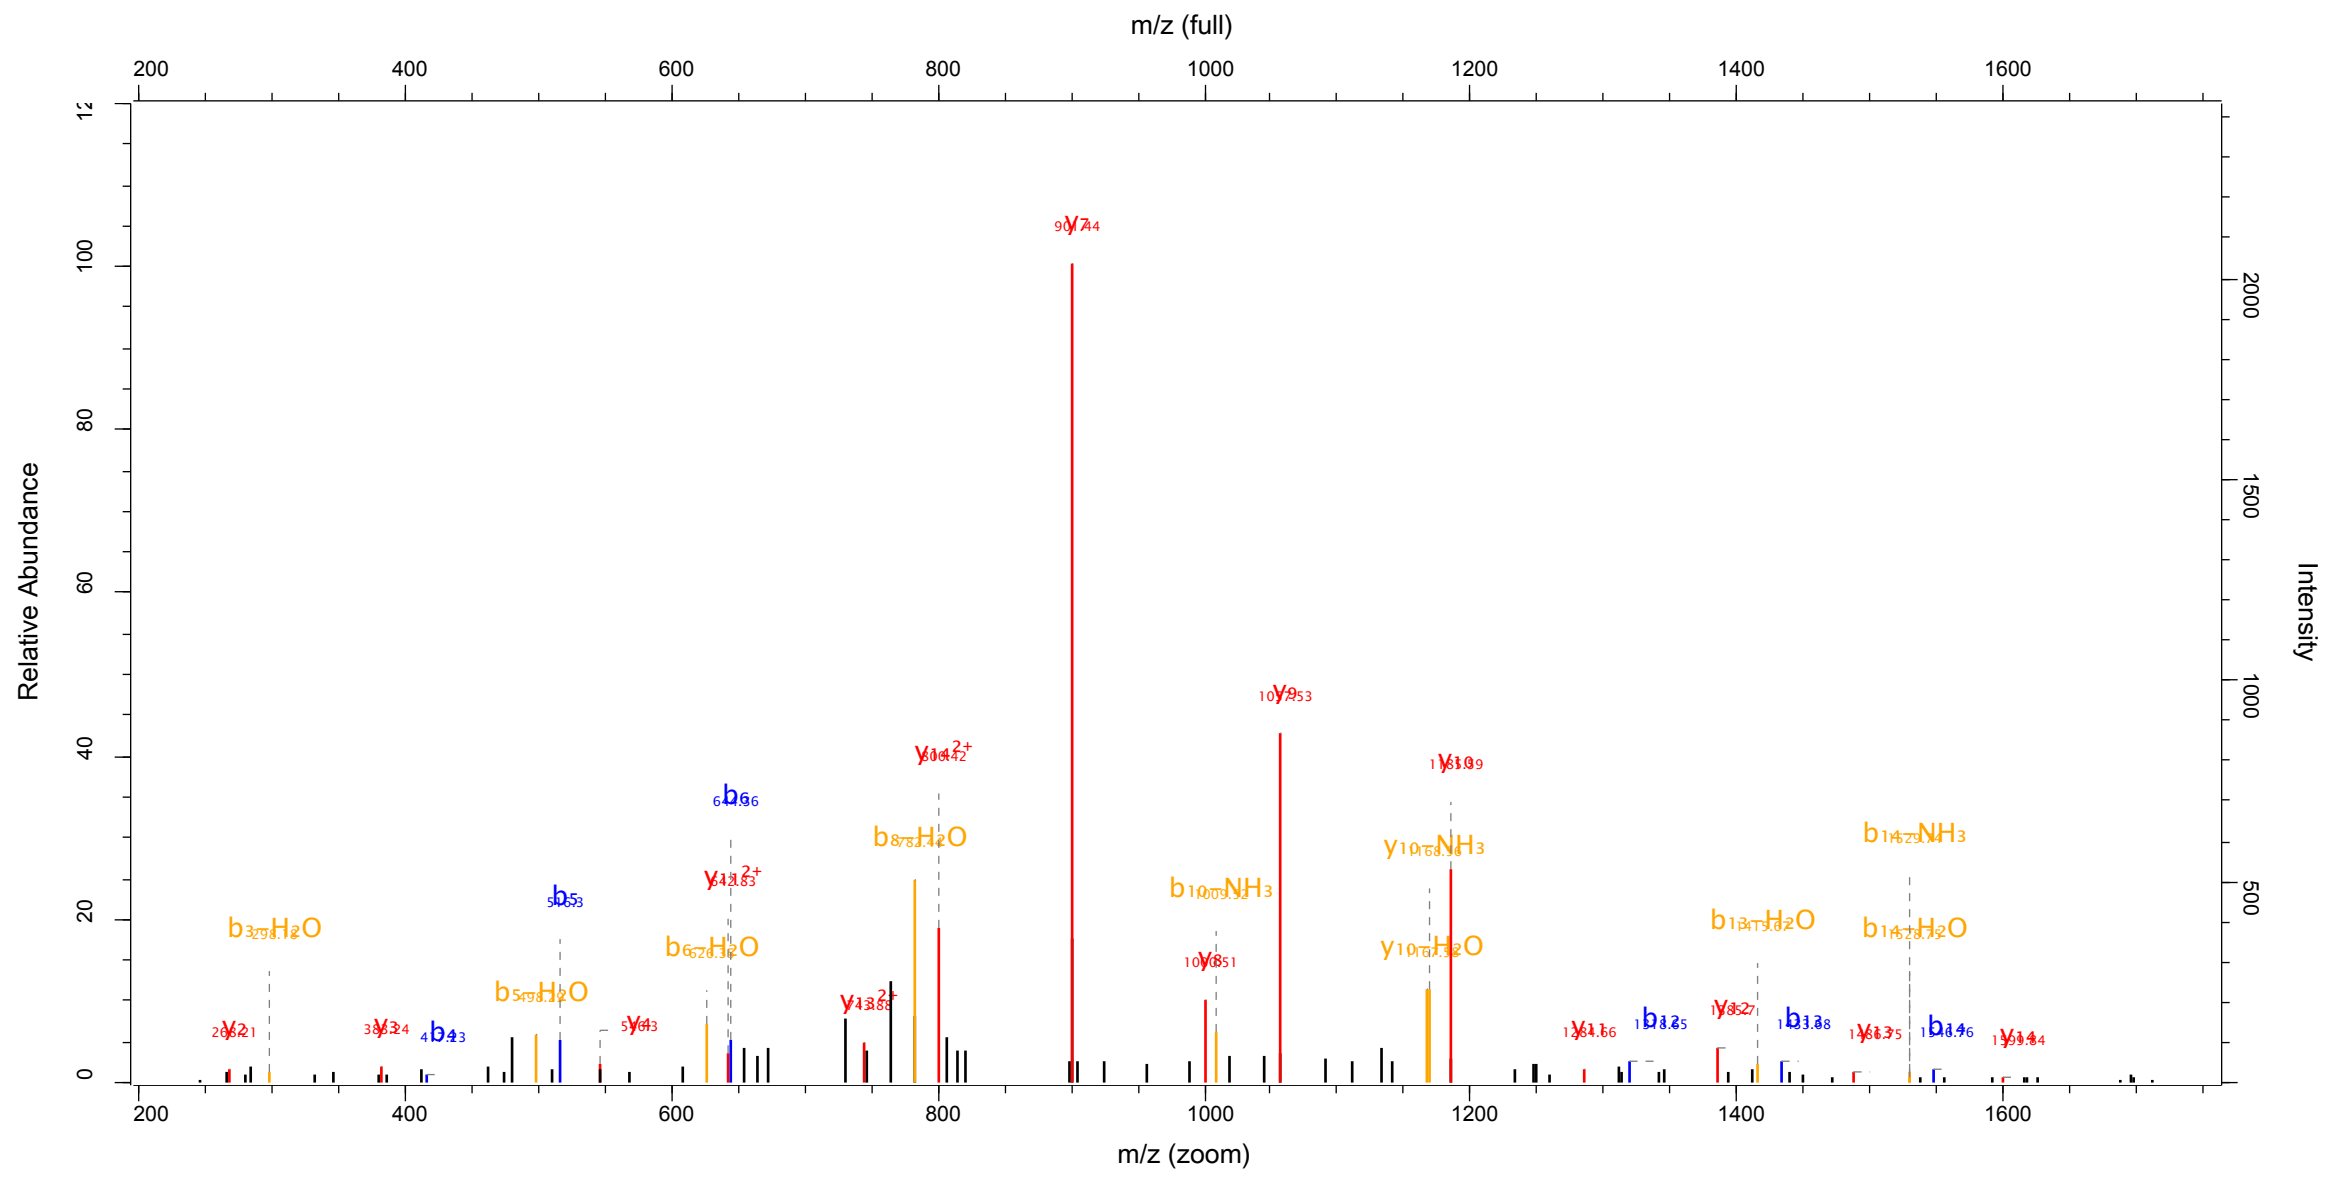

Scan number

3779

Raw file

nak\_cdc48UbconjugatesSAX5\_22may10\_6

Protein Group 2580

Method

ITMS; CID

Pepti...

77.64

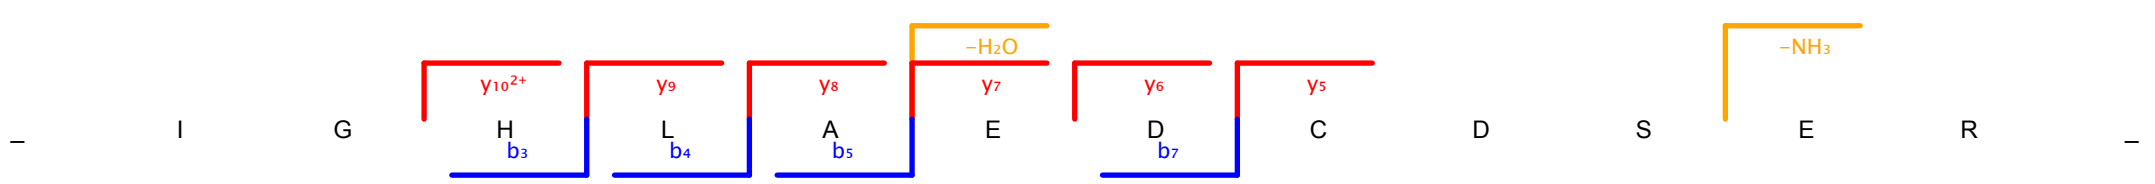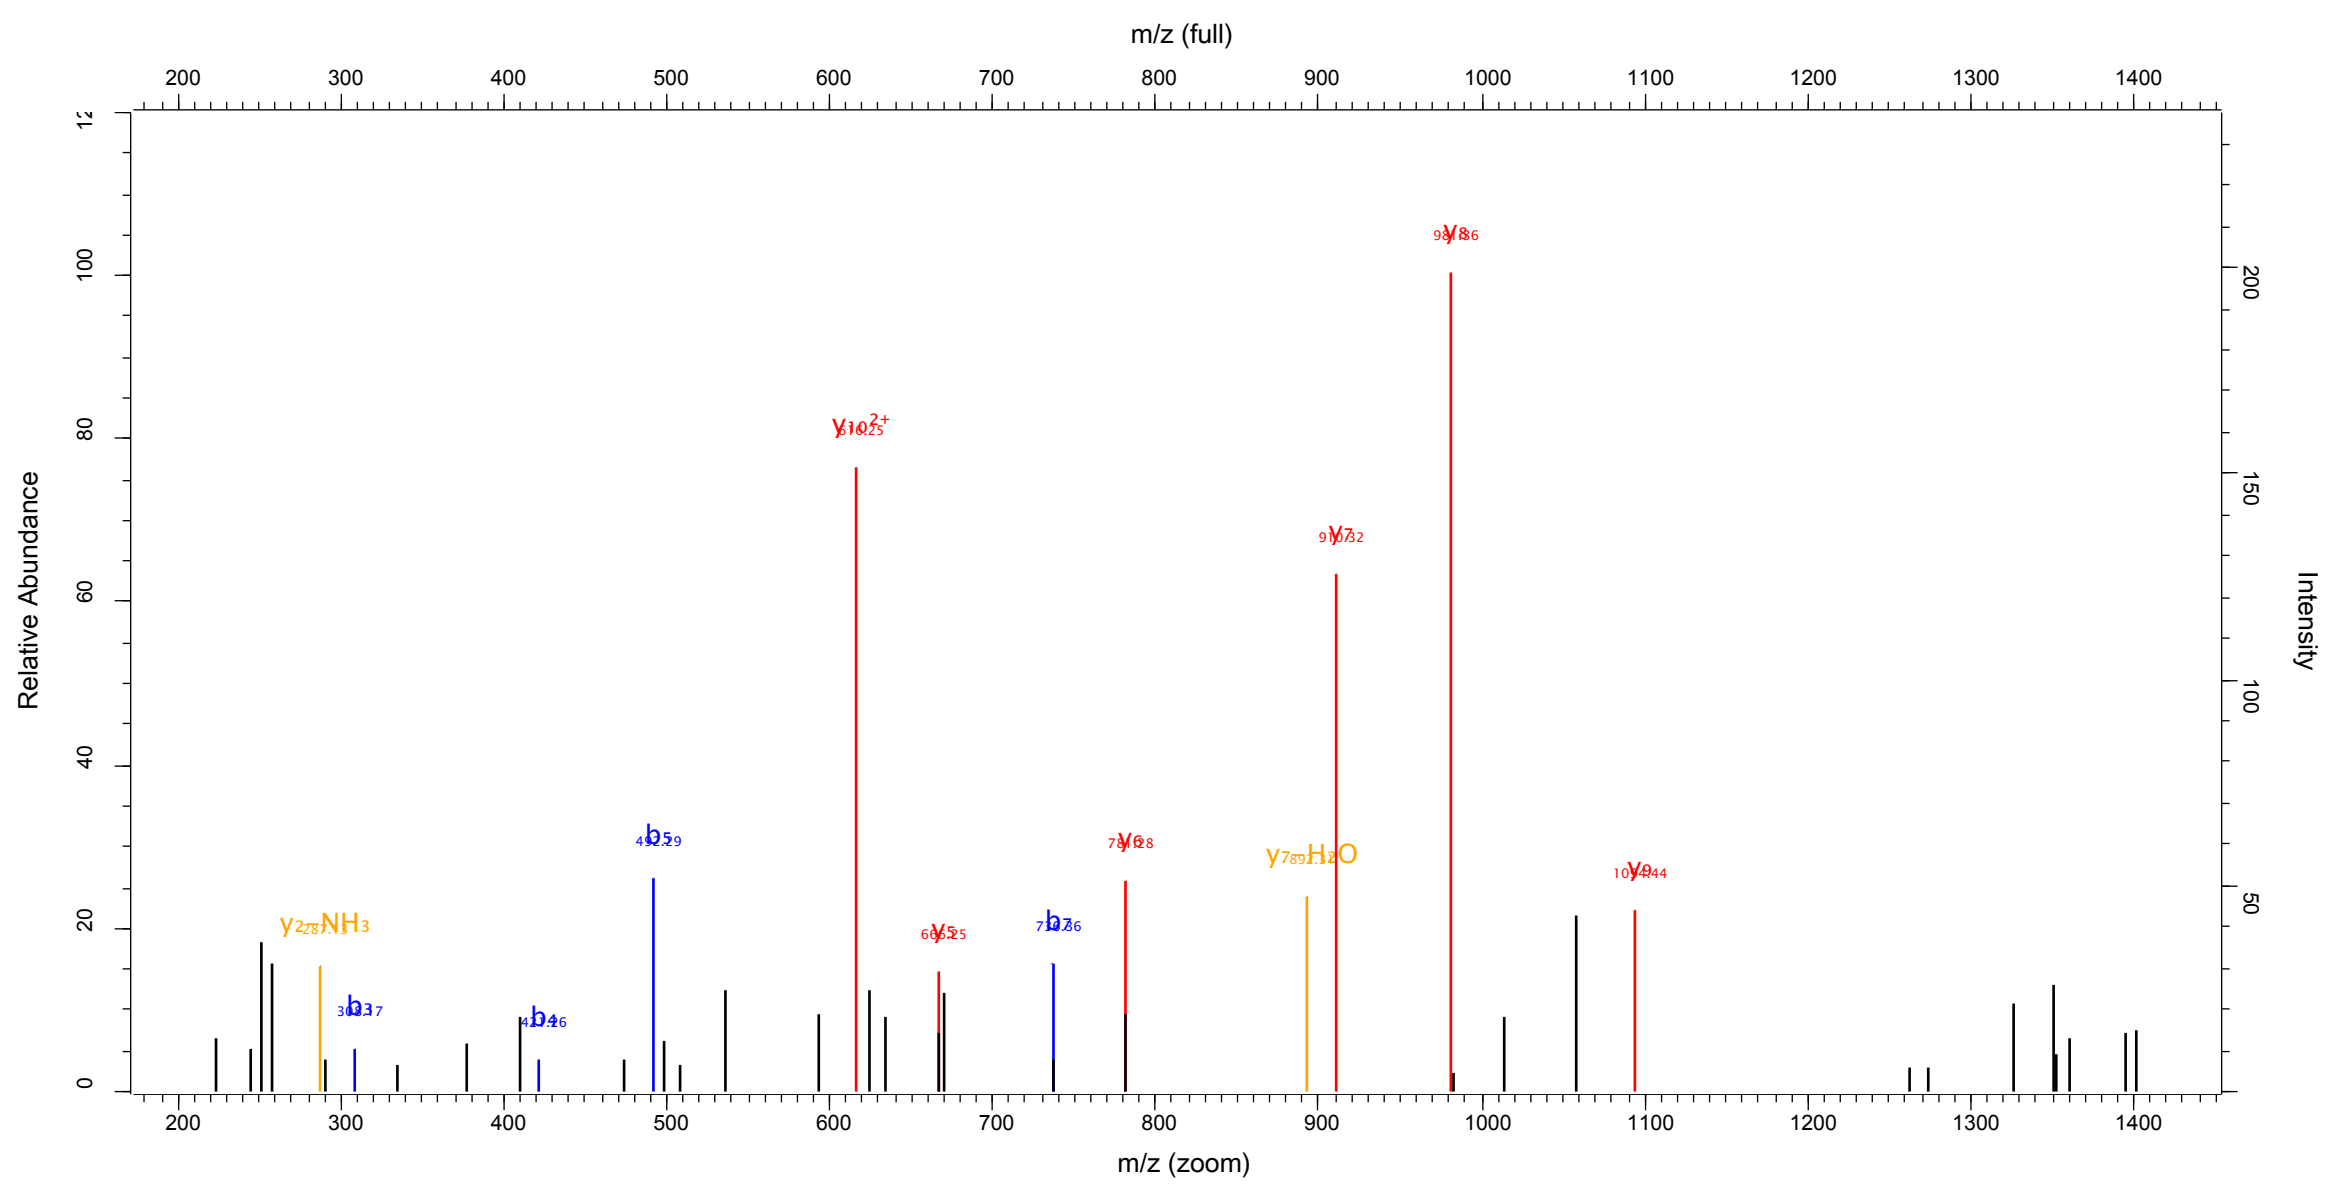

Scan number 10035 Raw file nak\_UBX2HSAX3\_8feb11\_07  
 Method ITMS; CID Pepti... 96.64

Protein Group 2596

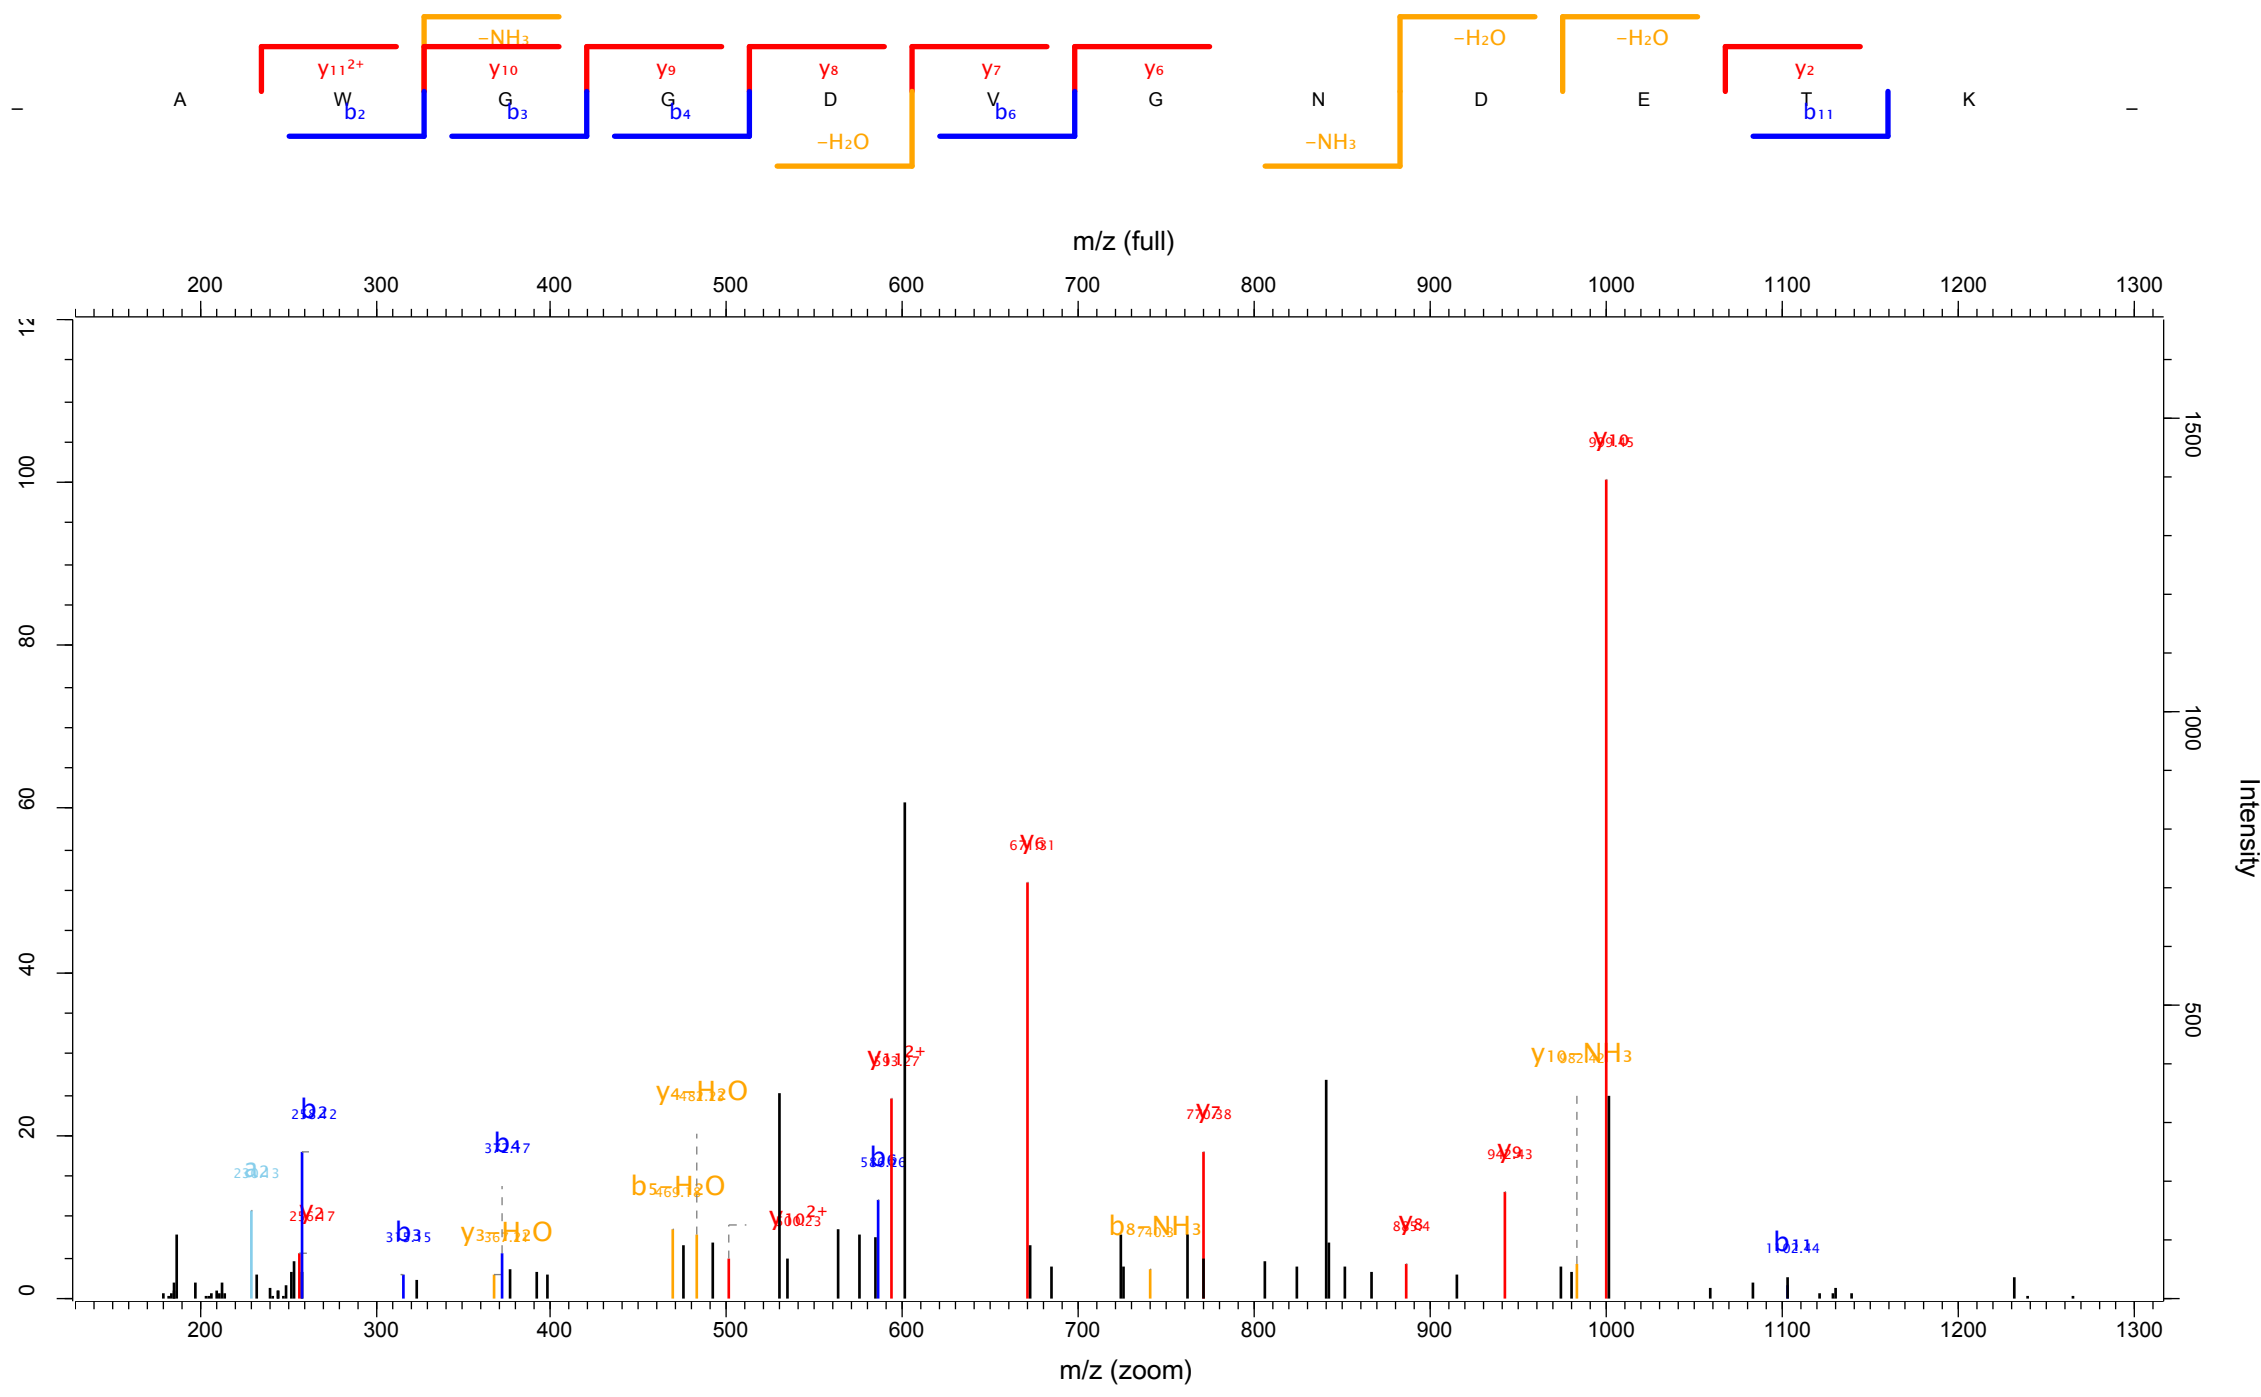

Scan number 27895 Raw file nak\_cdc48UbconjugatesSAX3\_21may14  
 Method ITMS; CID Pepti... 82.42

**Protein Group 2609**

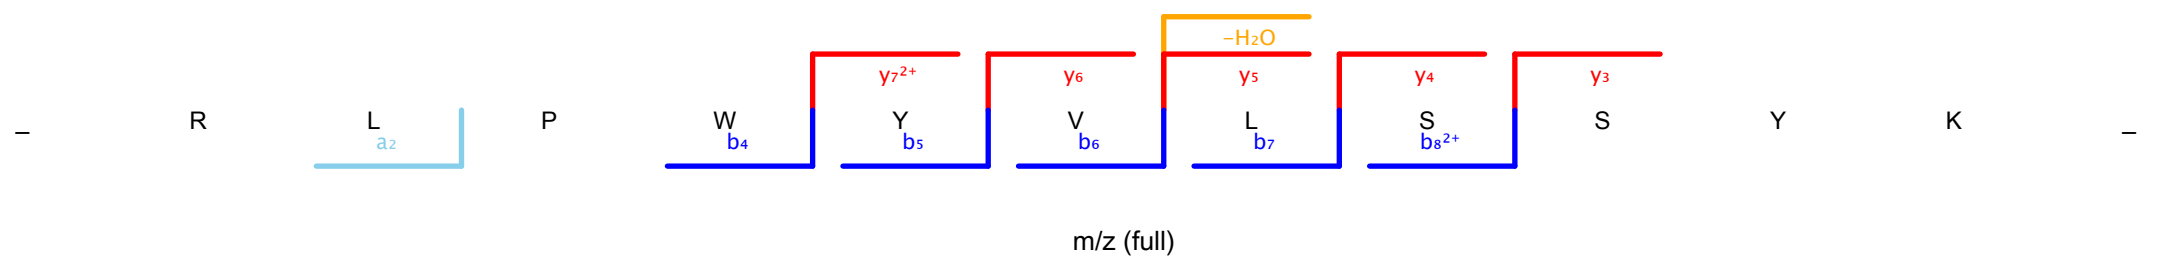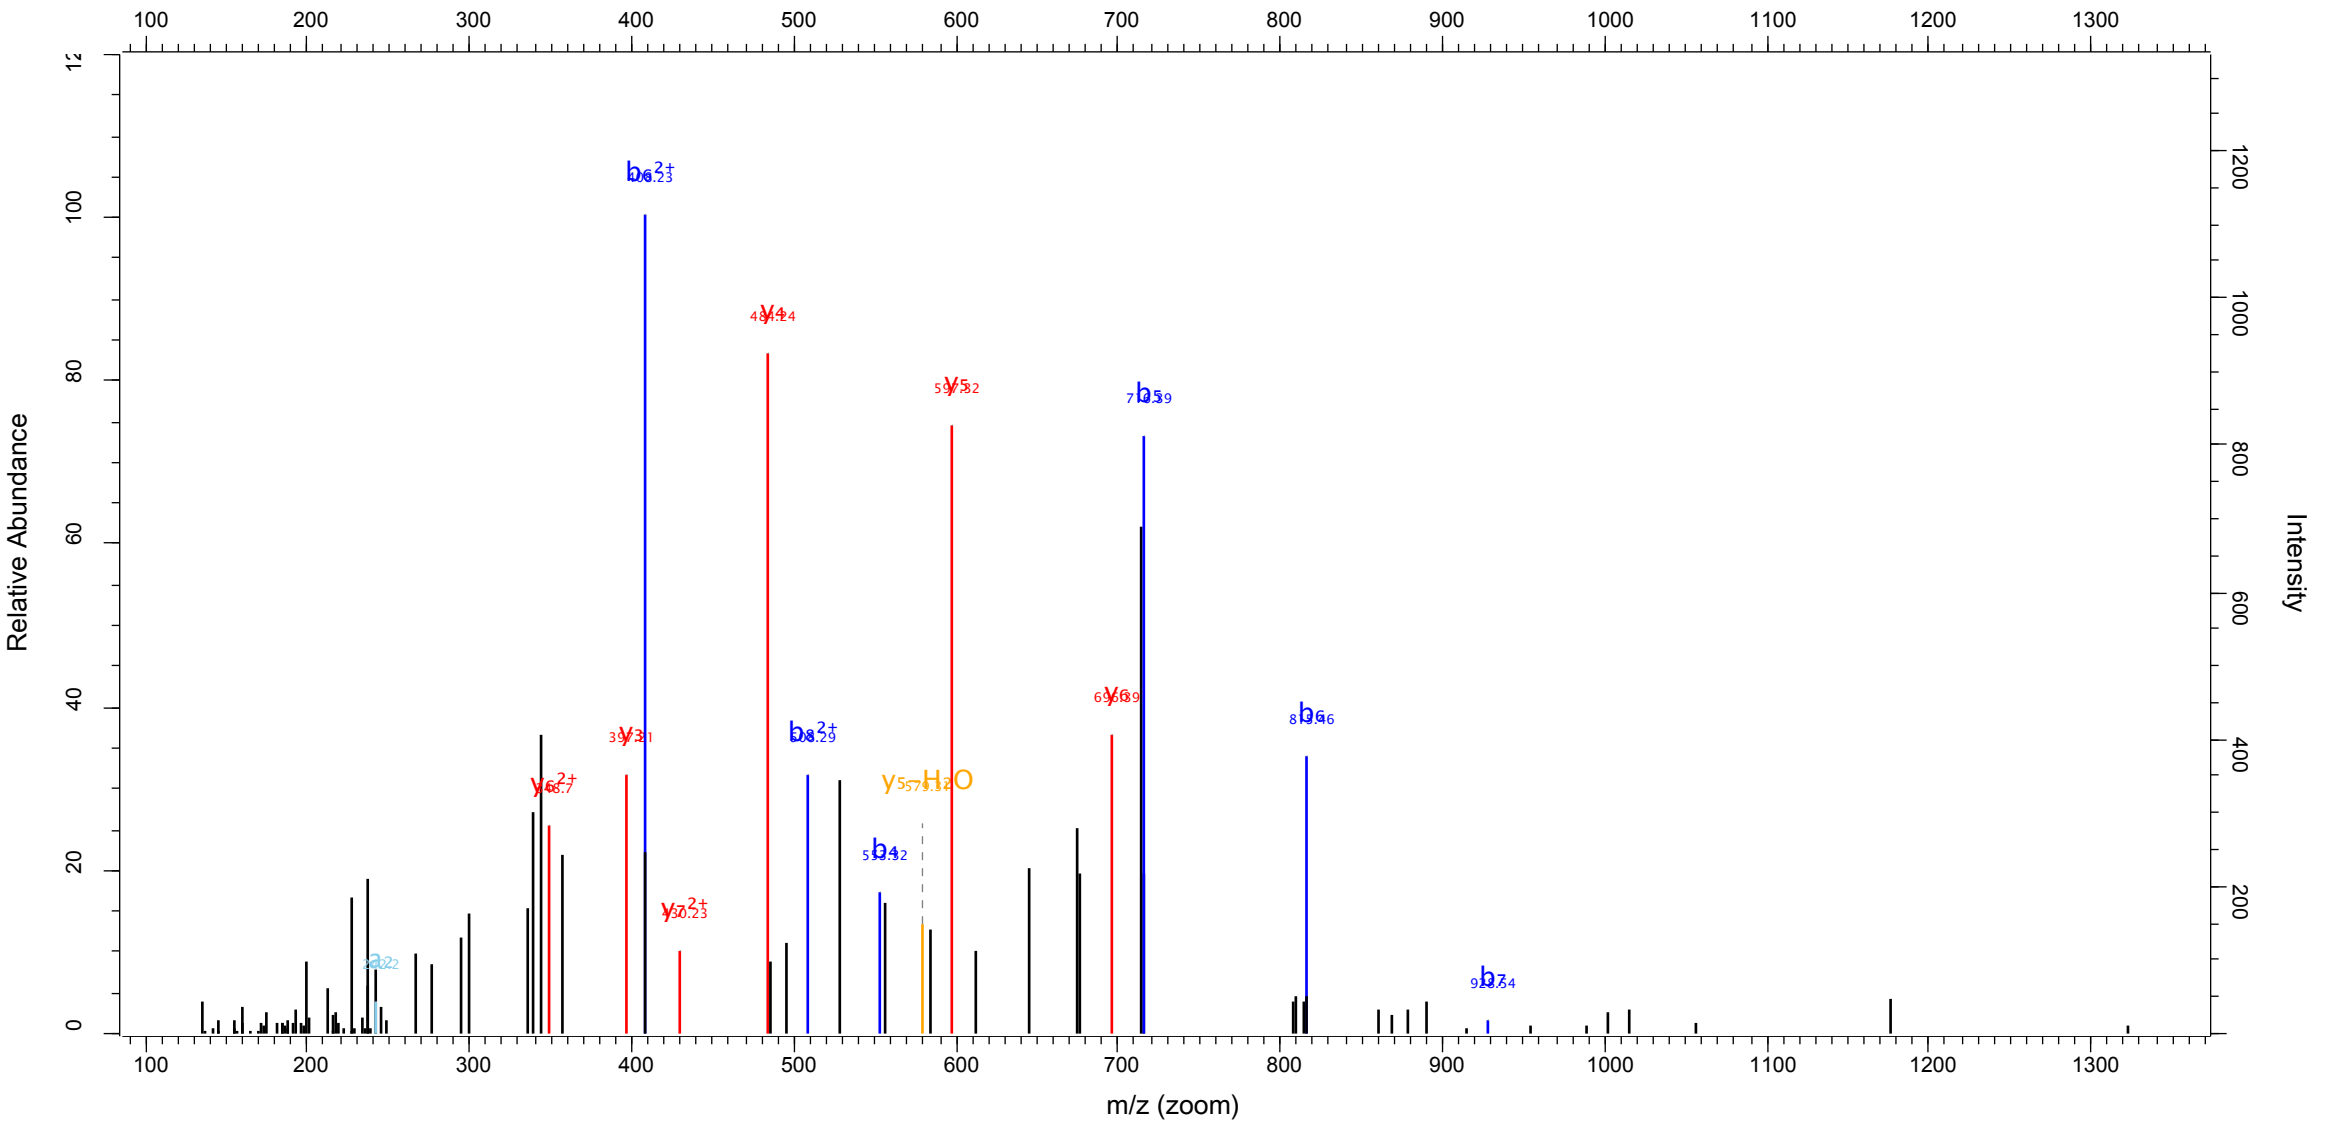

Scan number 12456 Raw file nak\_cdc48UbconjugatecontrolSAX6\_21may25\_100524125641  
 Method ITMS; CID Pepti... 93.15

Protein Group 2623

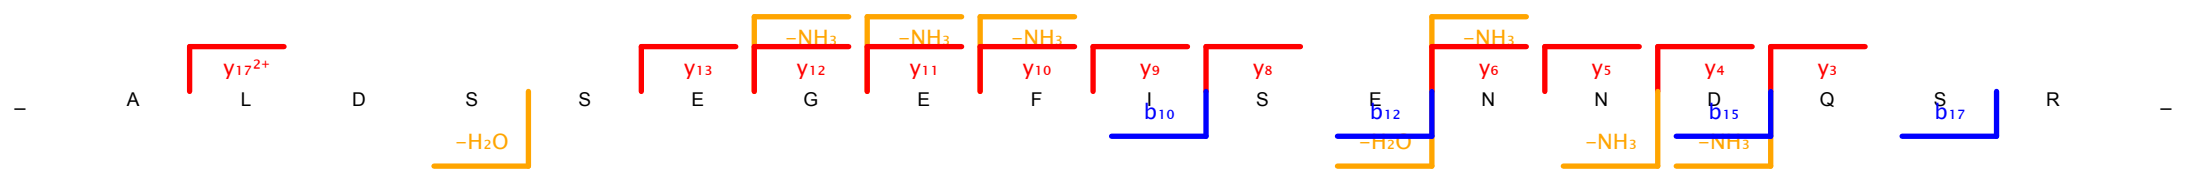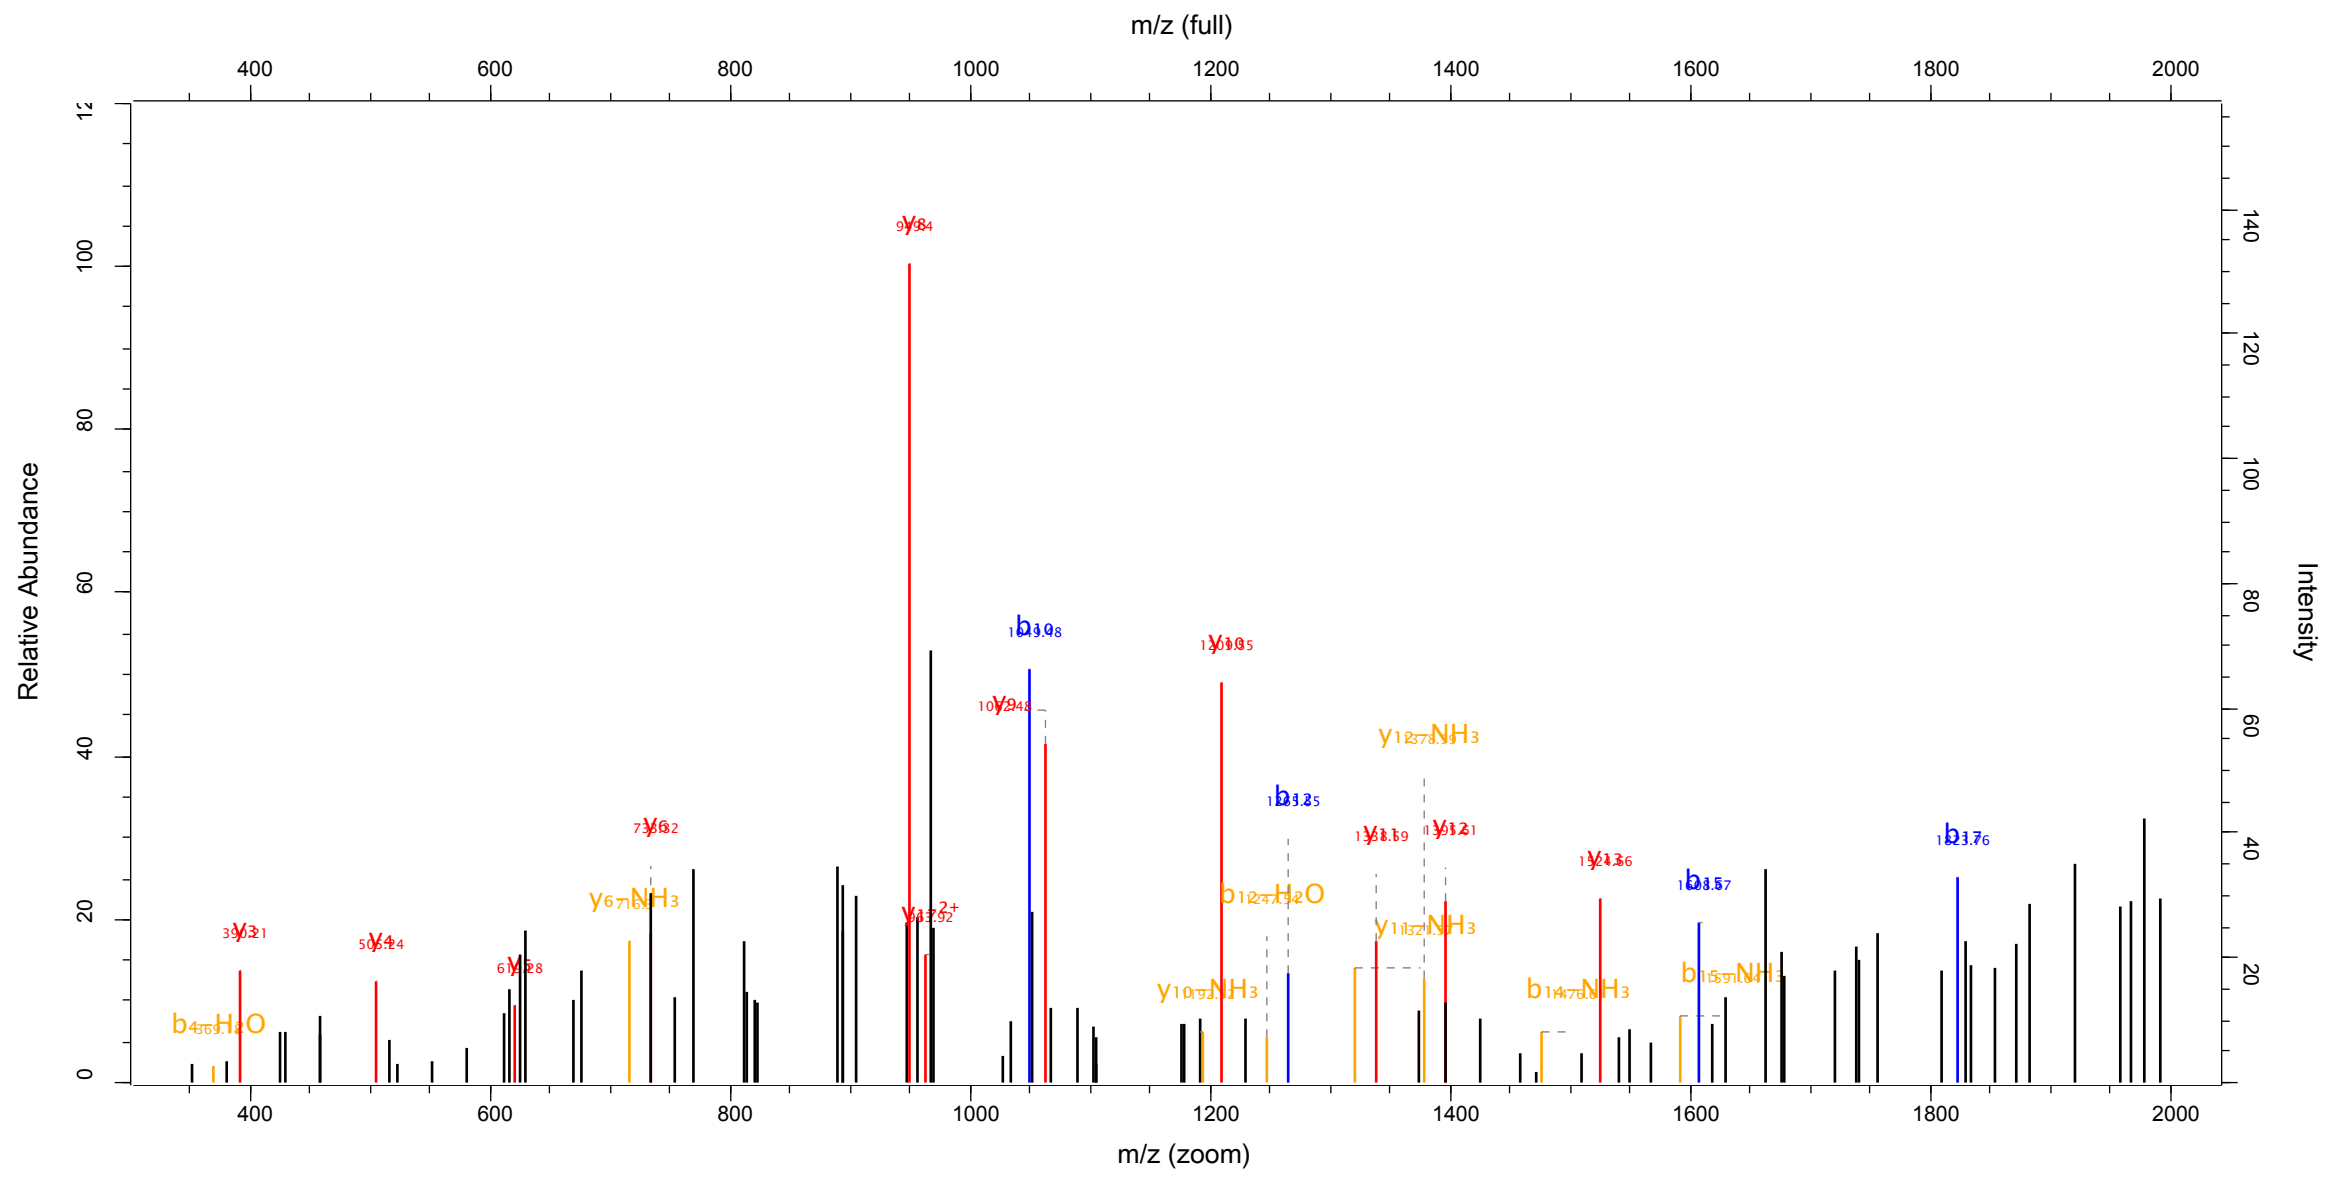

Scan number 25112 Raw file nak\_cdc48UbconjugatescontrolSAX4\_14may10\_15  
Method ITMS; CID Pepti... 91.08

Protein Group 2640

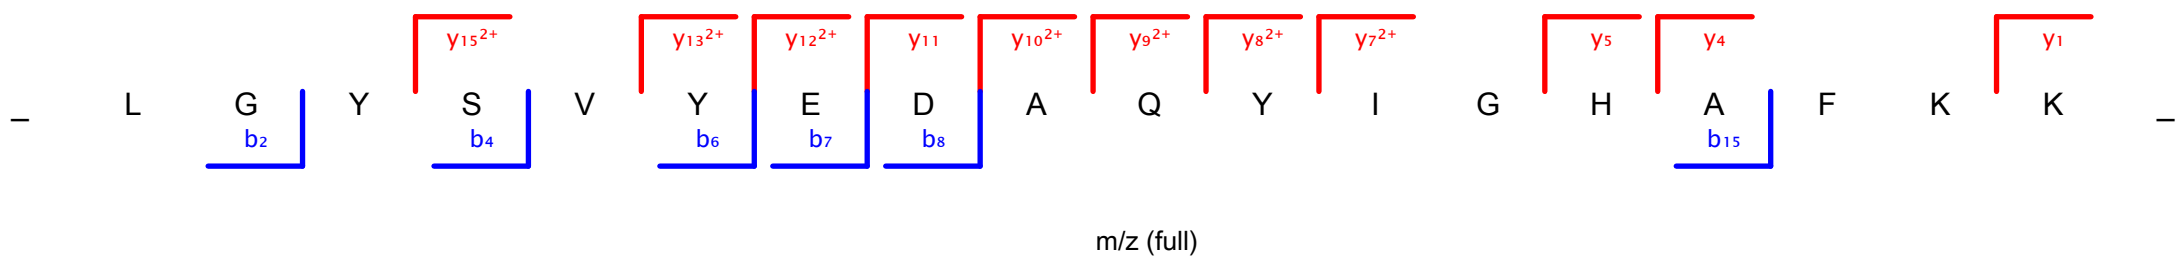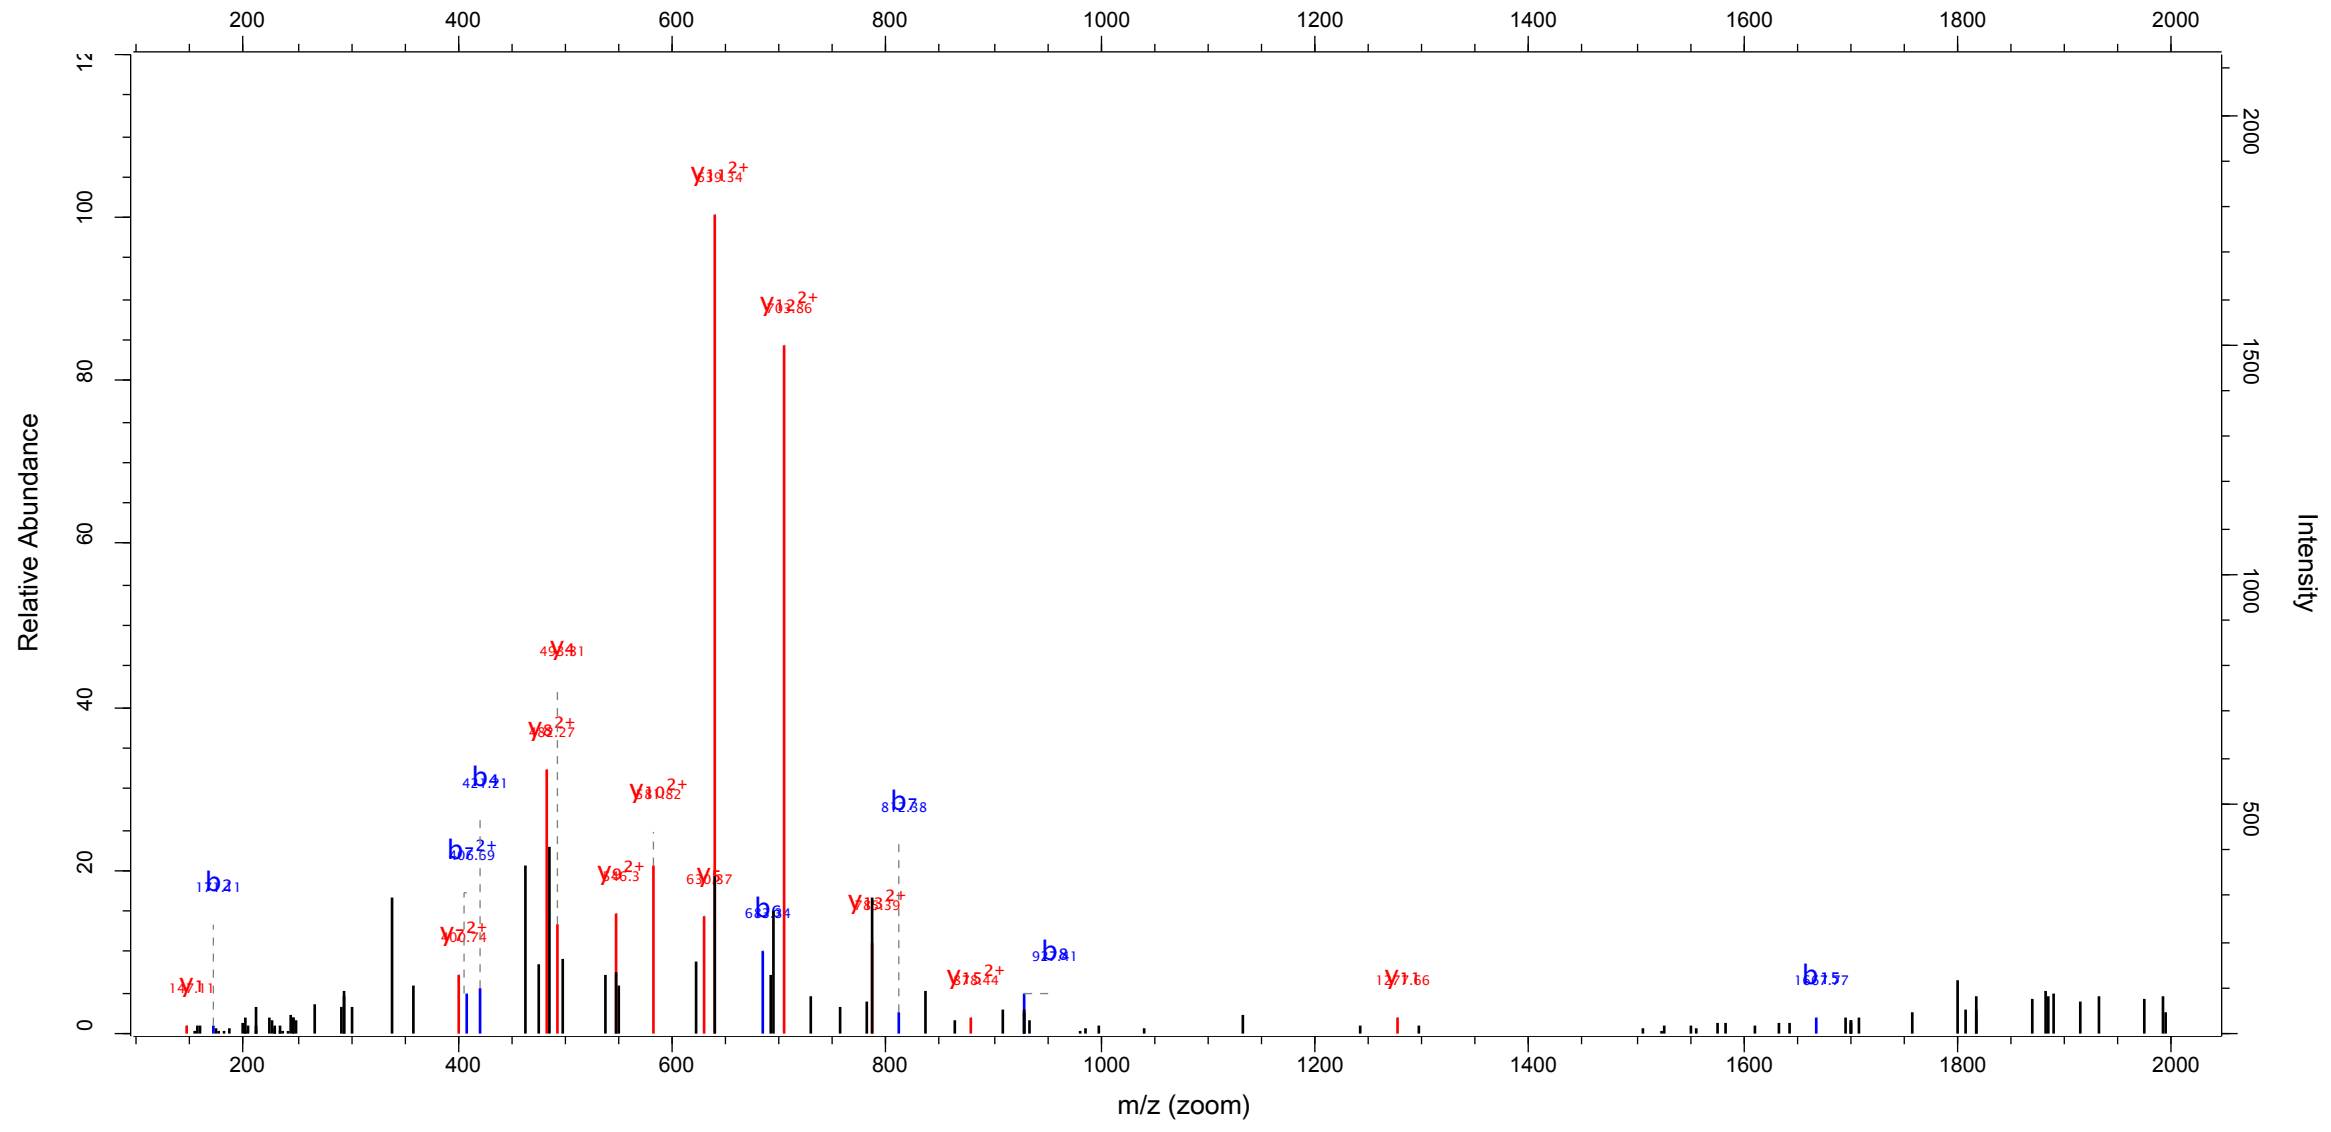

Scan number 5917 Raw file nak\_cdc48UbconjugatesSAX5\_14may10\_09  
 Method ITMS; CID Pepti... 71.24

Protein Group 2688

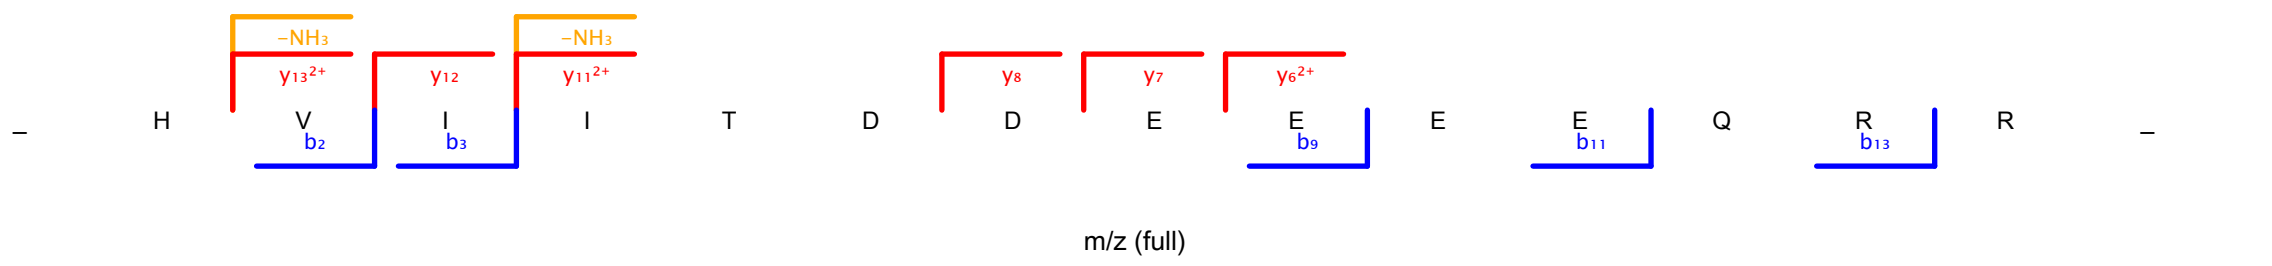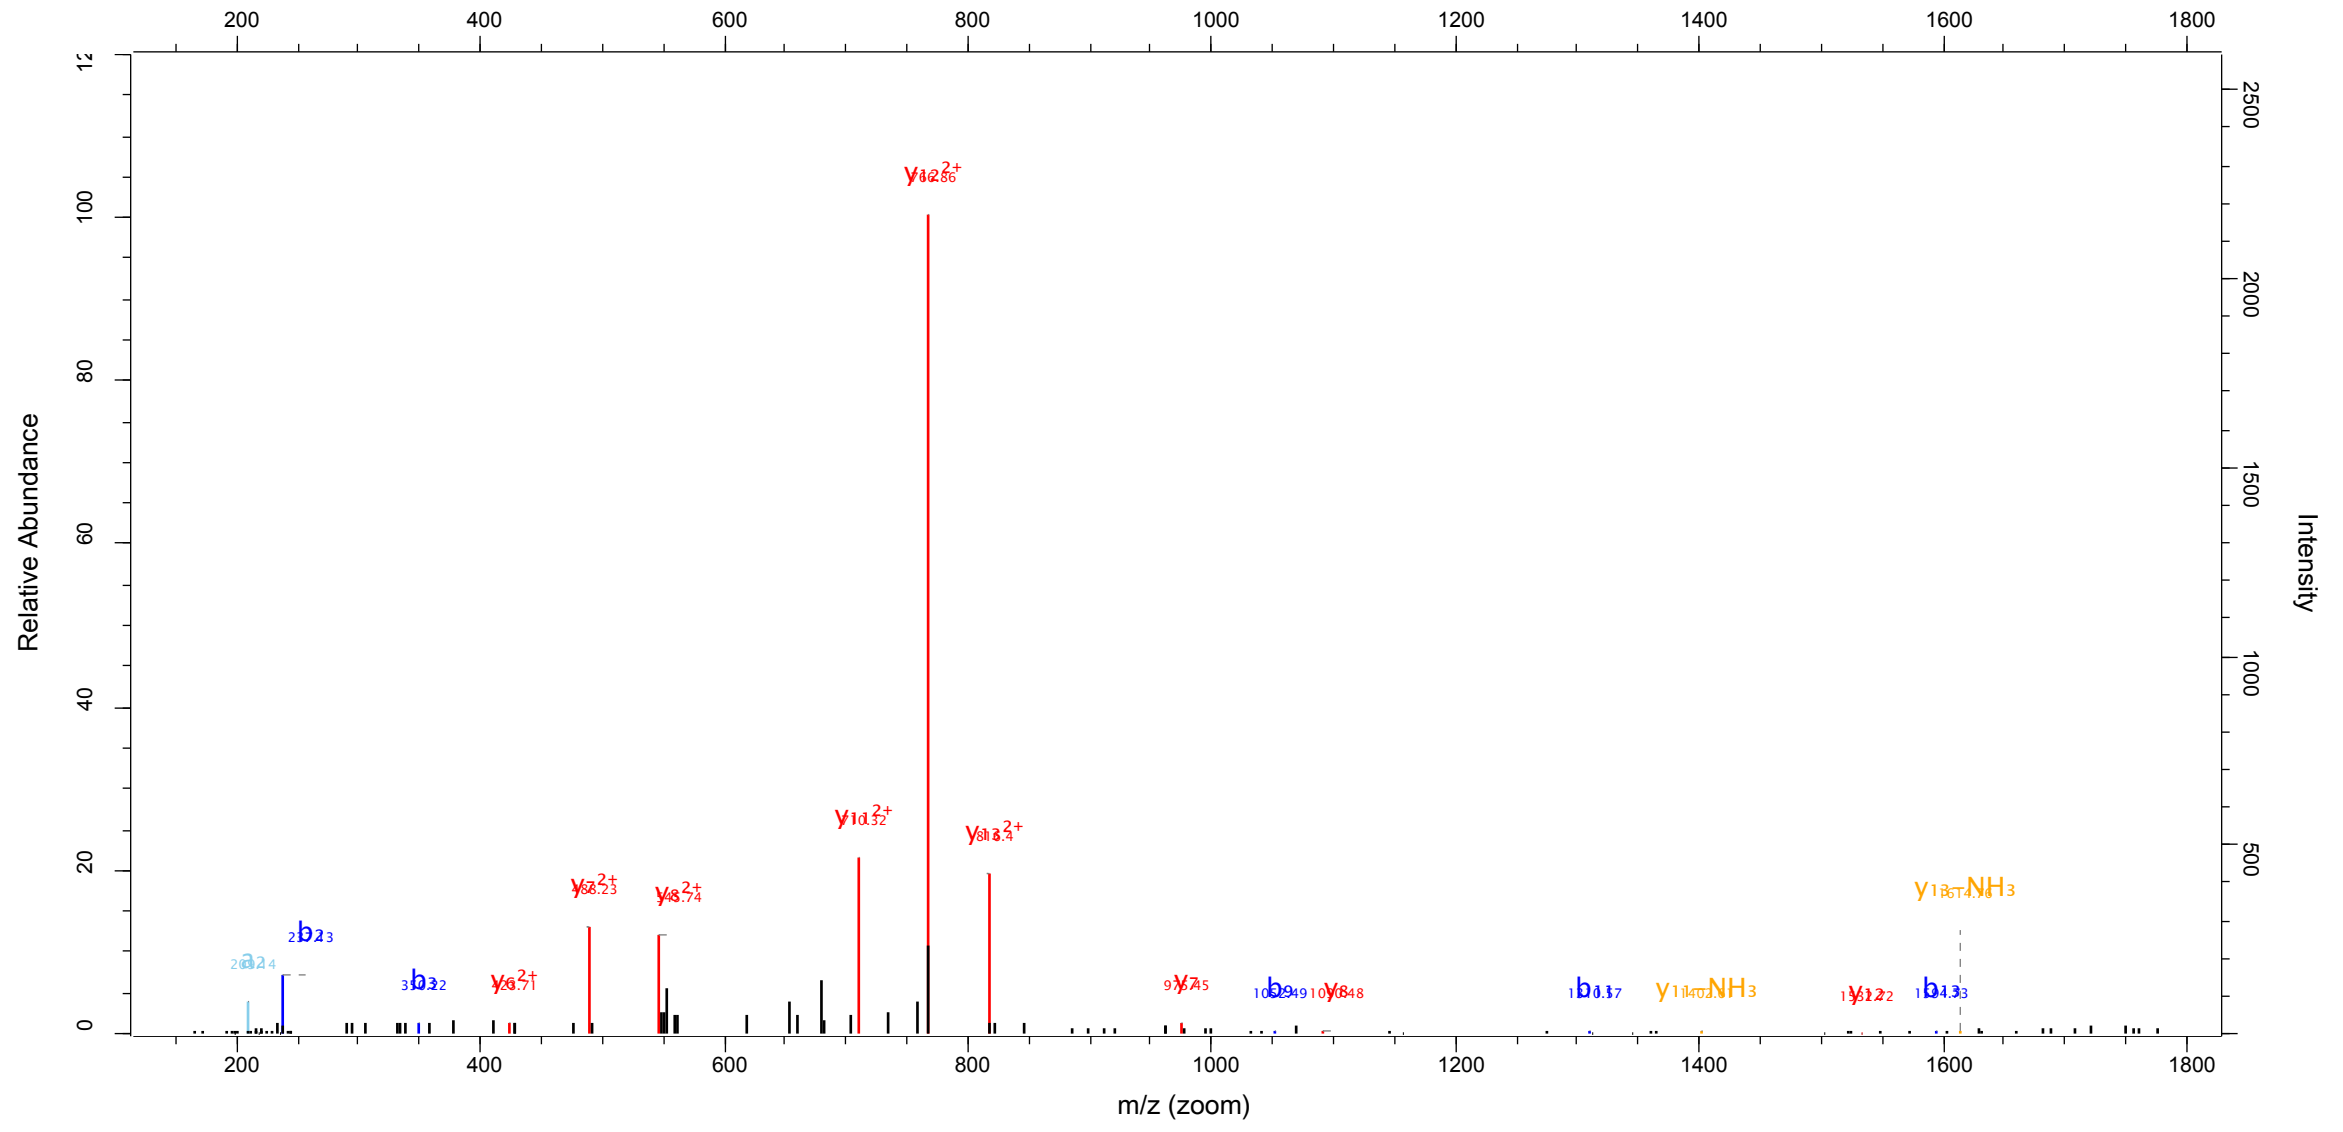

Scan number 45180 Raw file nak\_ubx4LightSAX1\_11nov01  
 Method ITMS; CID Pepti... 81.52

**Protein Group 2758**

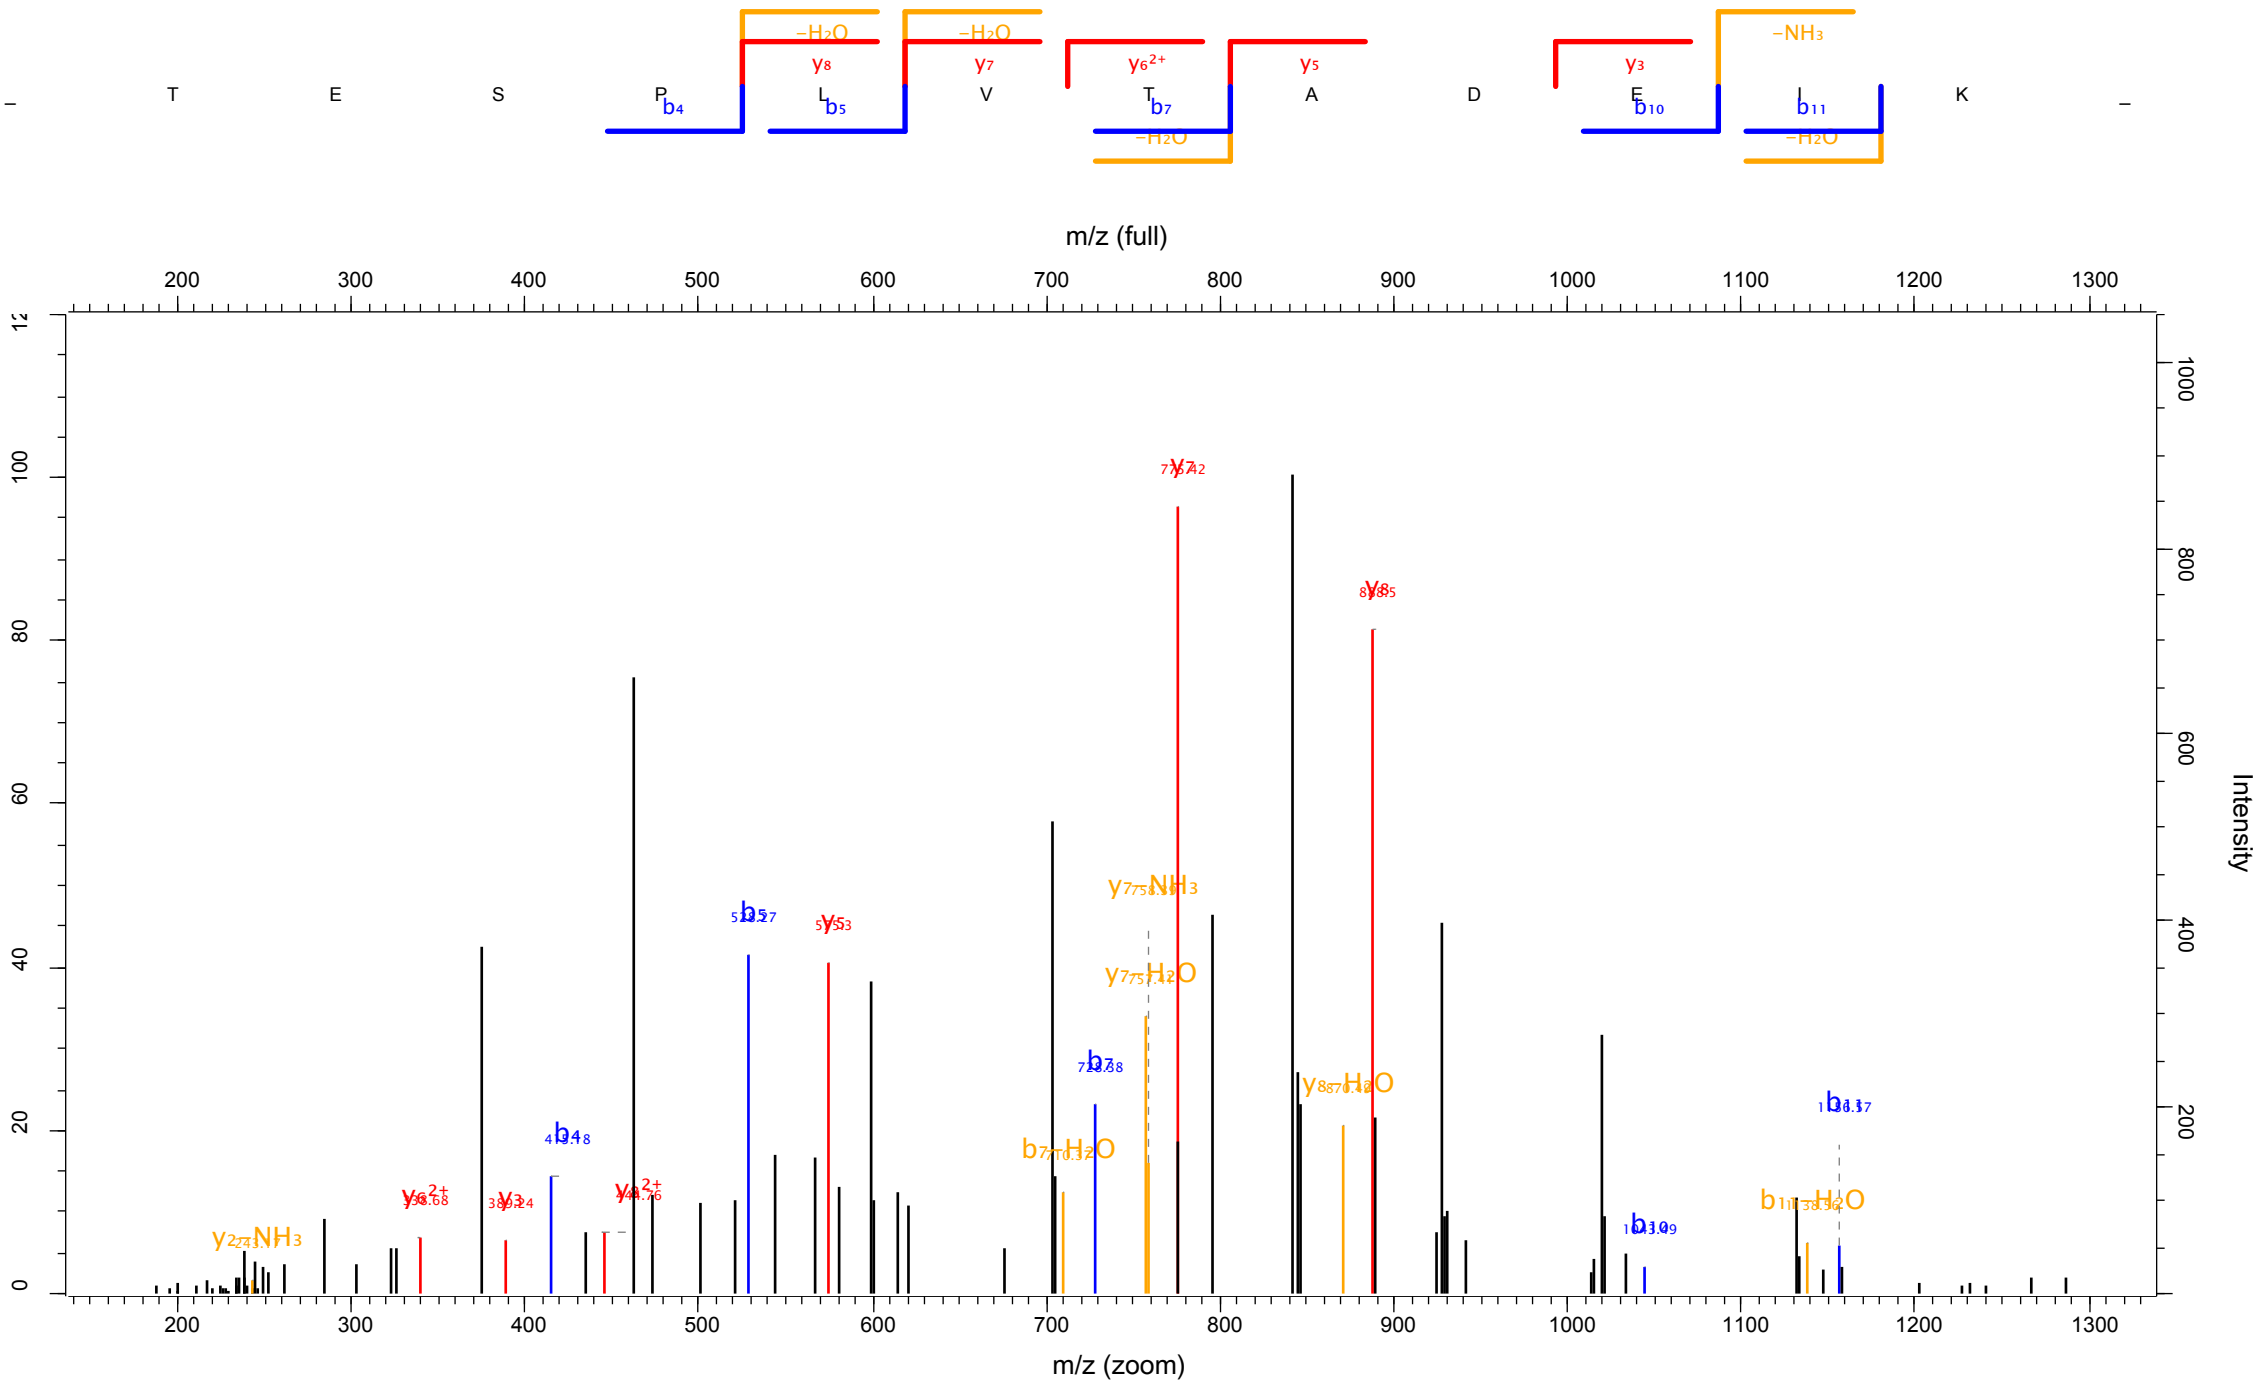



Scan number  
Method

26379  
ITMS; CID

Raw file  
Pepti...

nak\_ubx4LightSAX5\_11nov05  
169.05

Protein Group 2766

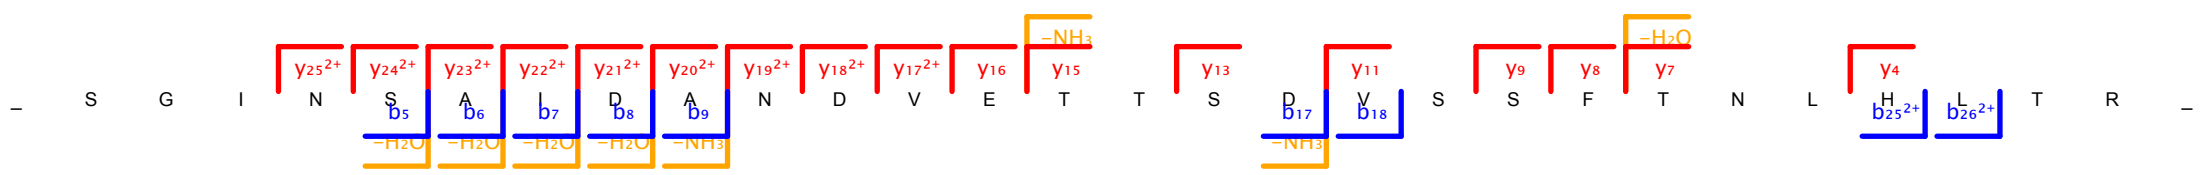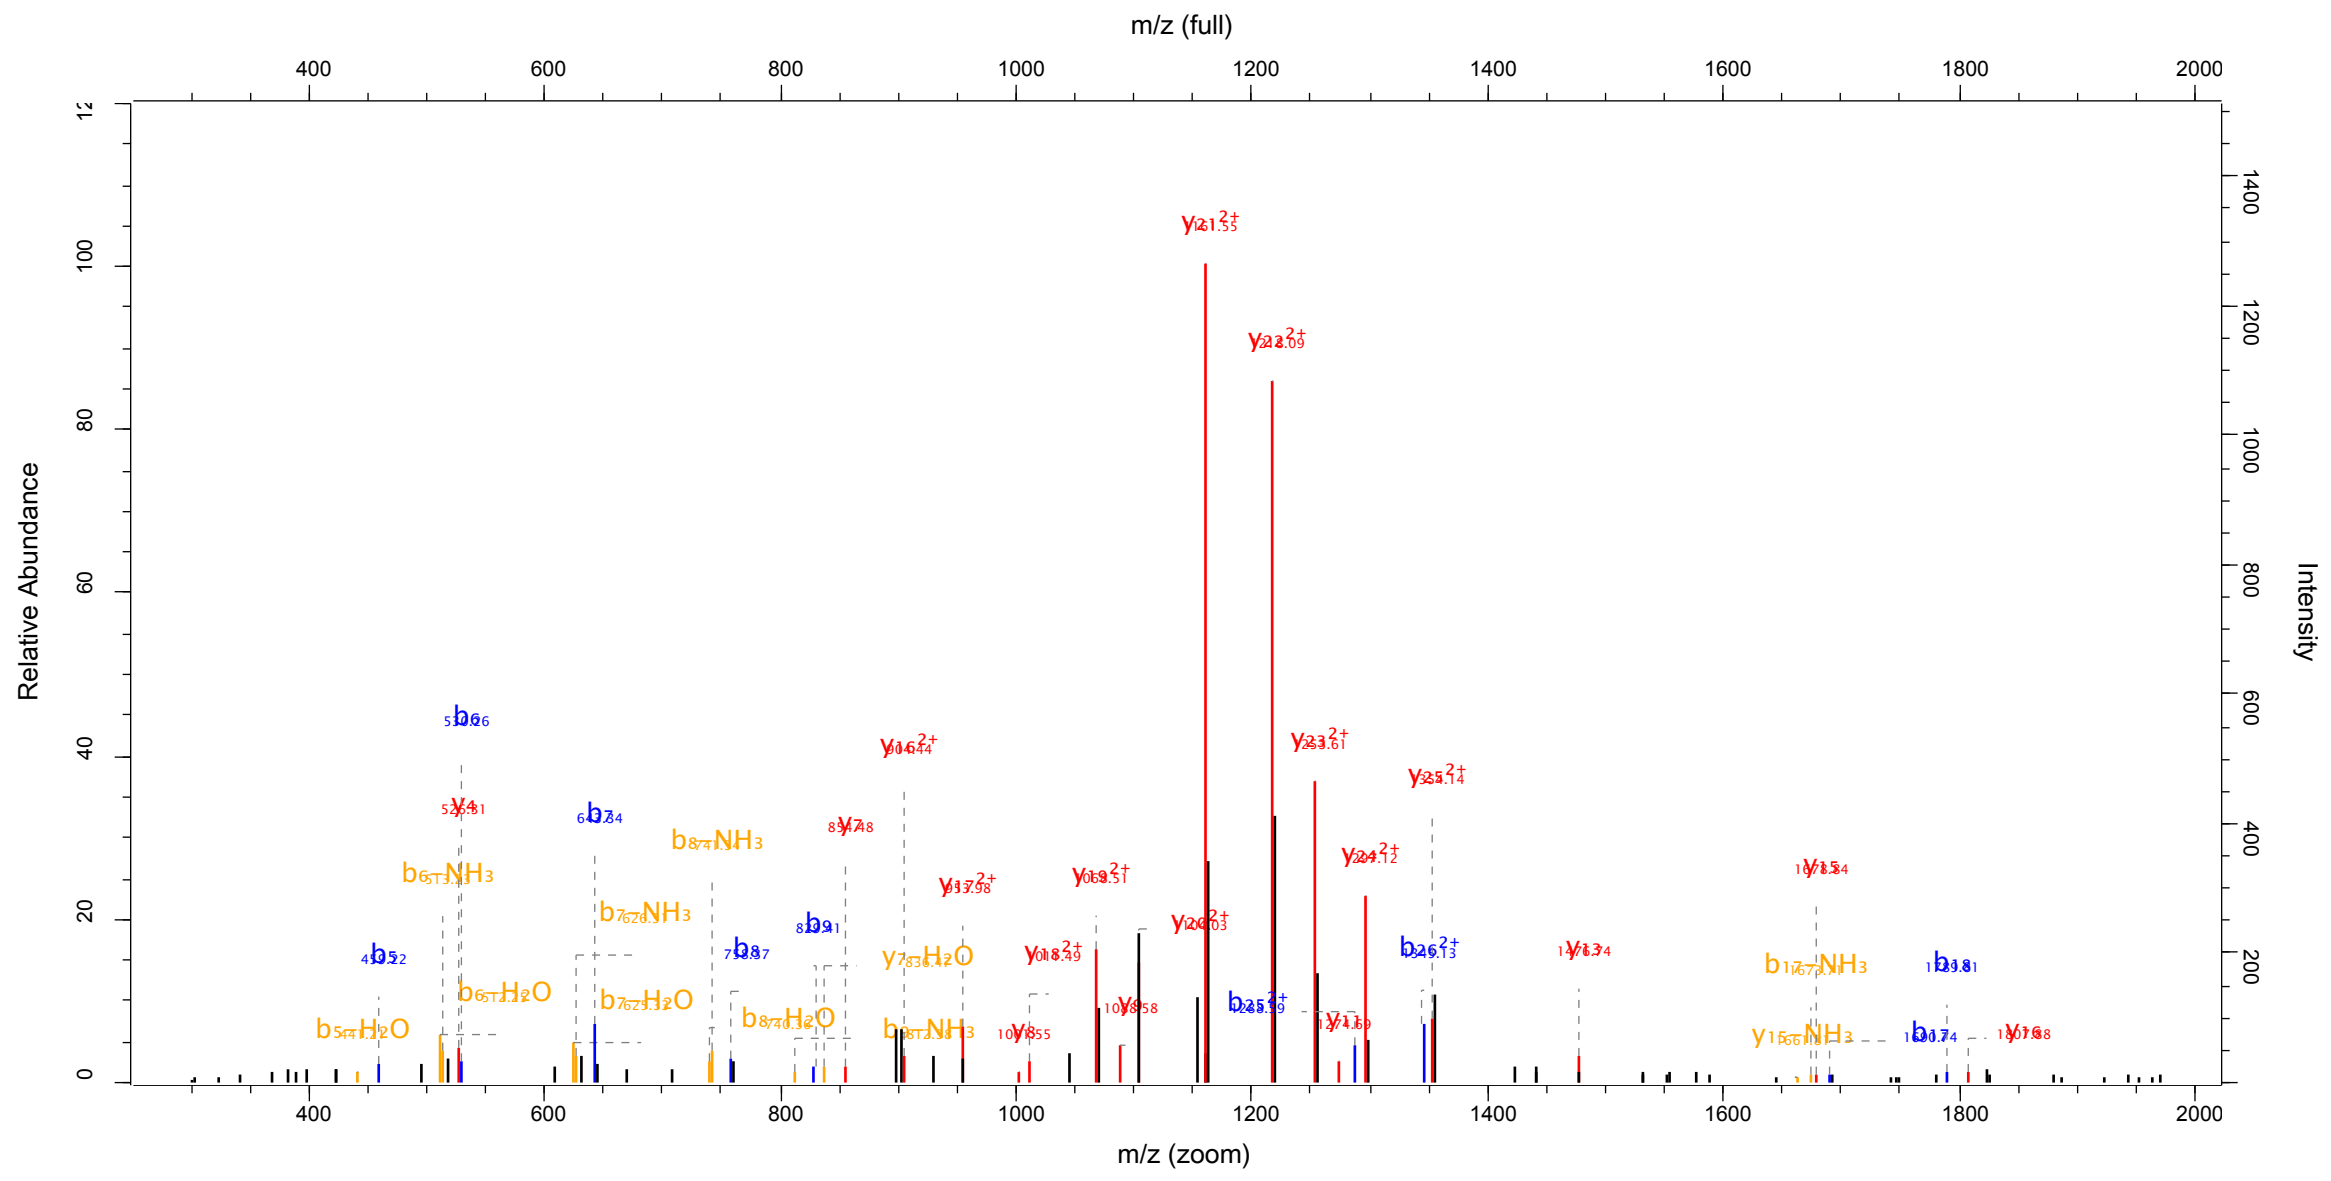

Scan number 36679 Raw file nak\_cdc48UbconjugatesSAX1\_21may12  
 Method ITMS; CID Pepti... 215.75

**Protein Group 2767**

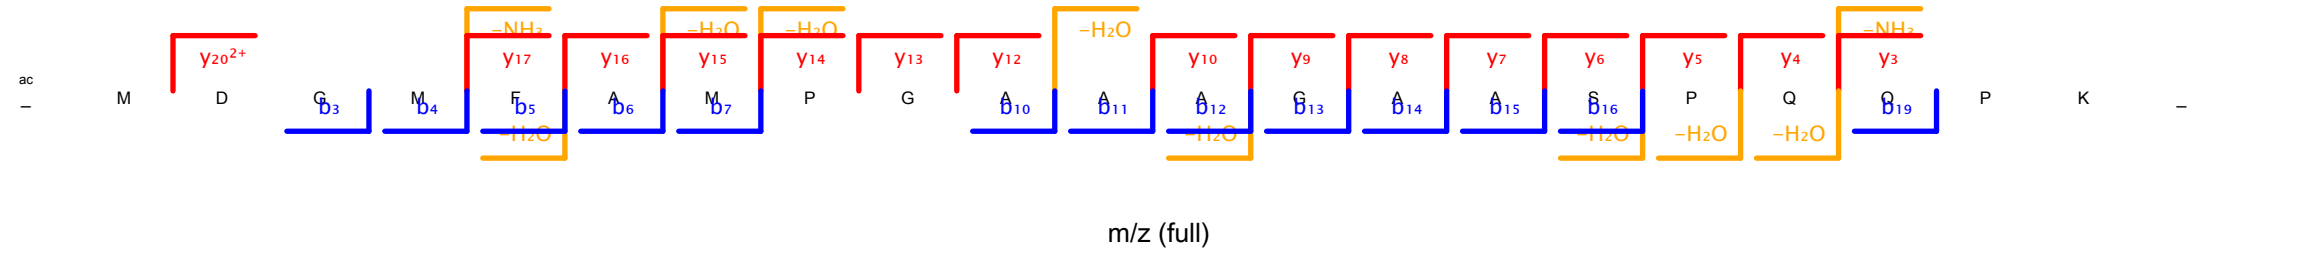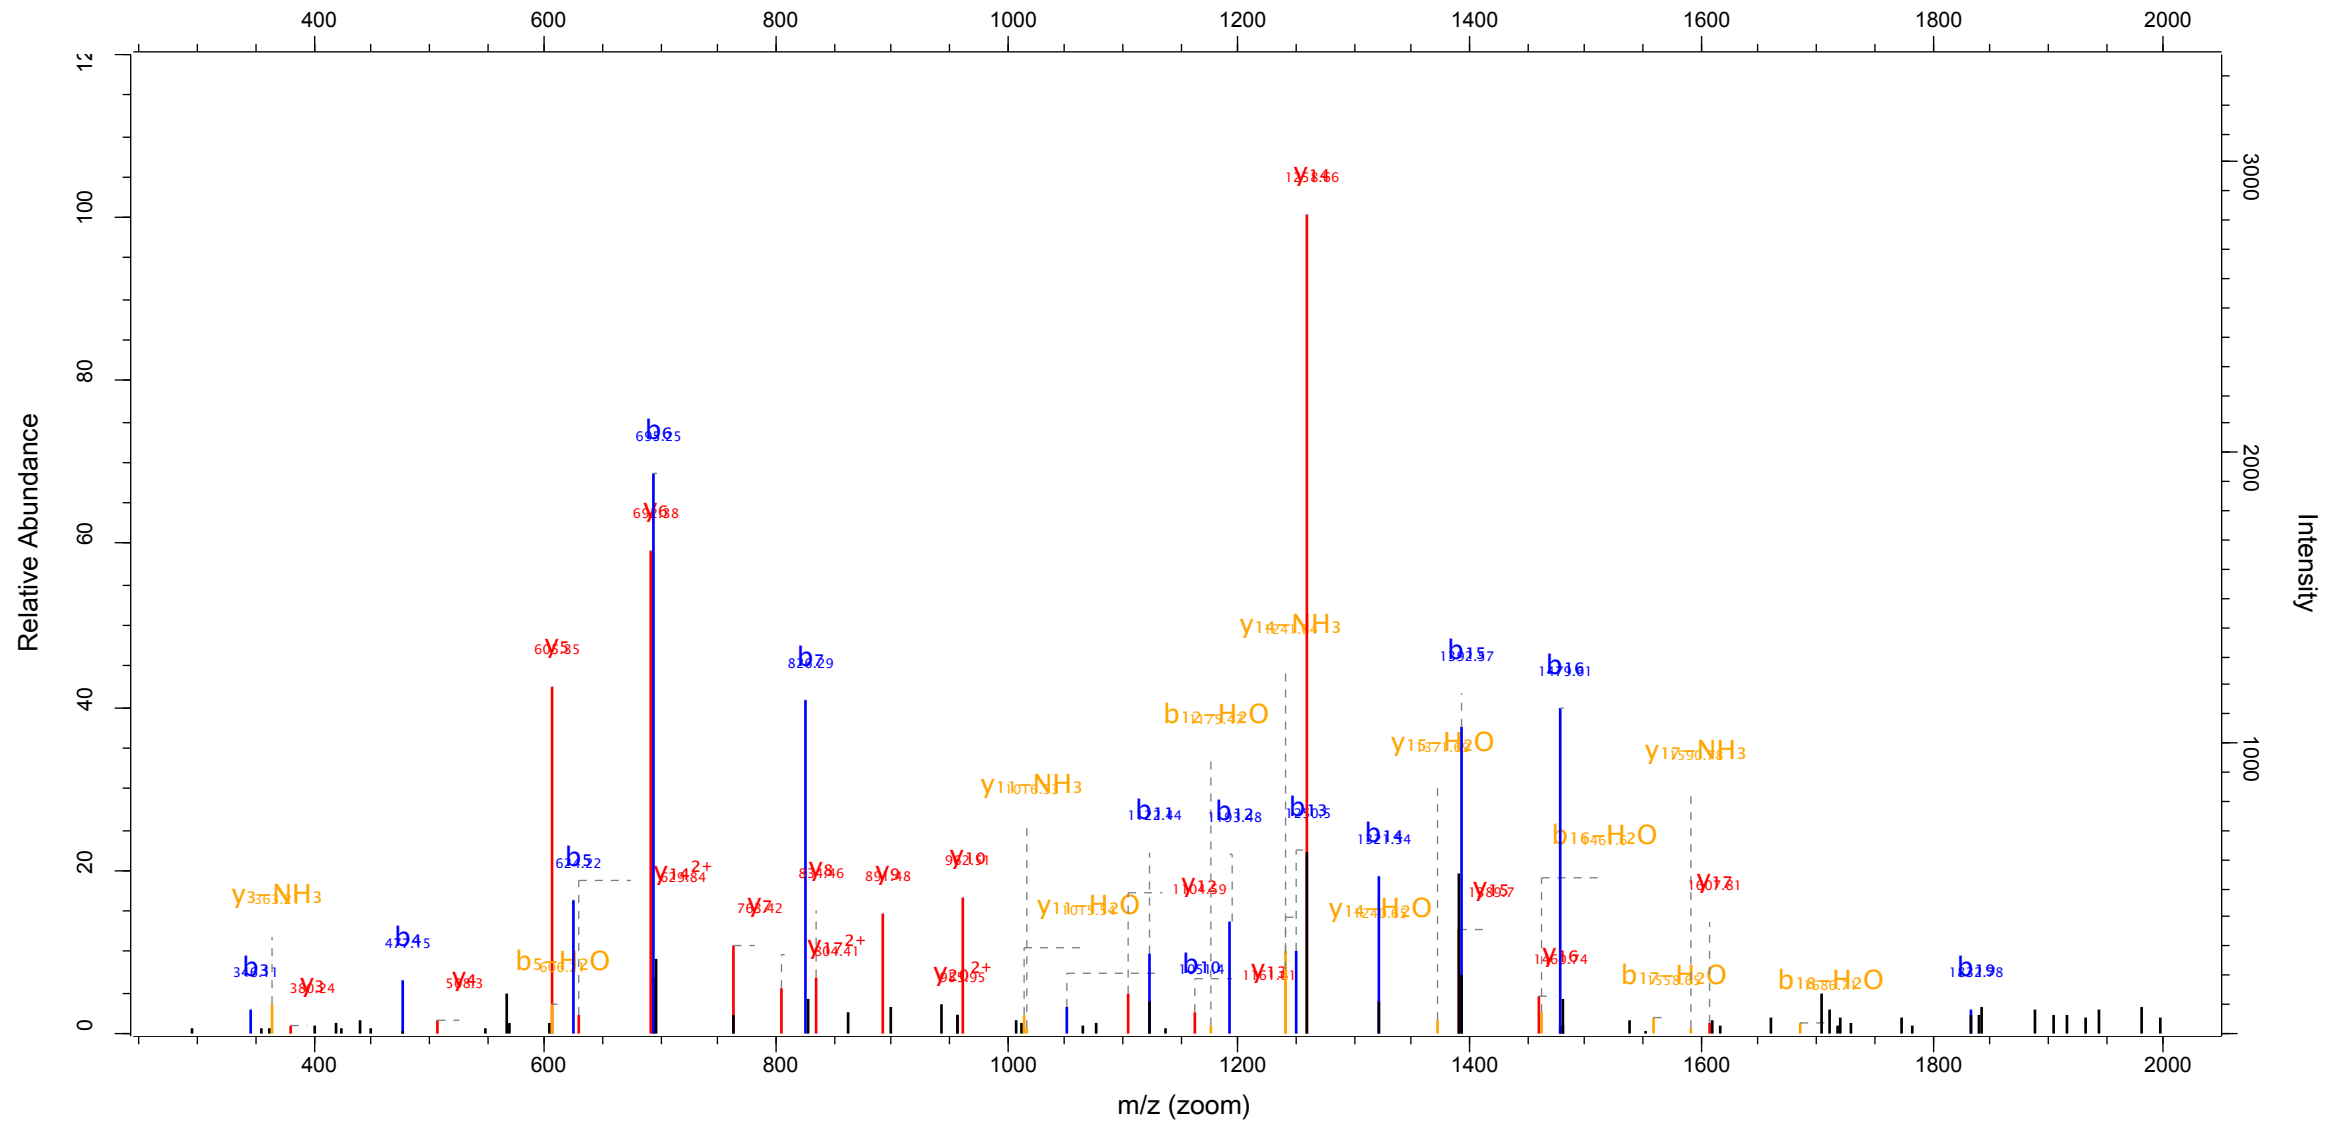

Scan number  
Method

16960  
ITMS; CID

Raw file  
Pepti...

nak\_UBX6SAX5L\_14jan11\_15  
78.69

Protein Group 2770

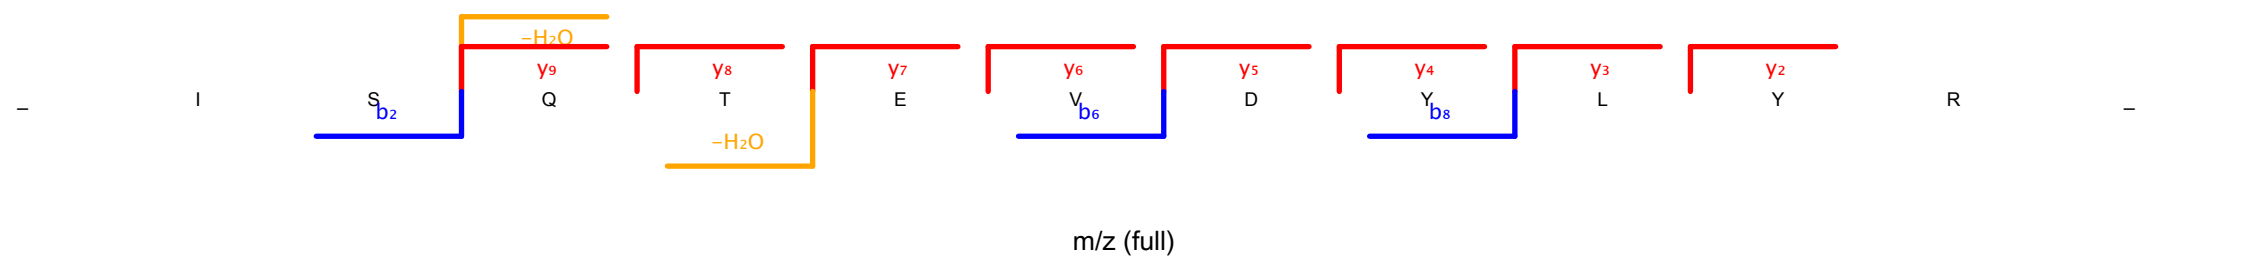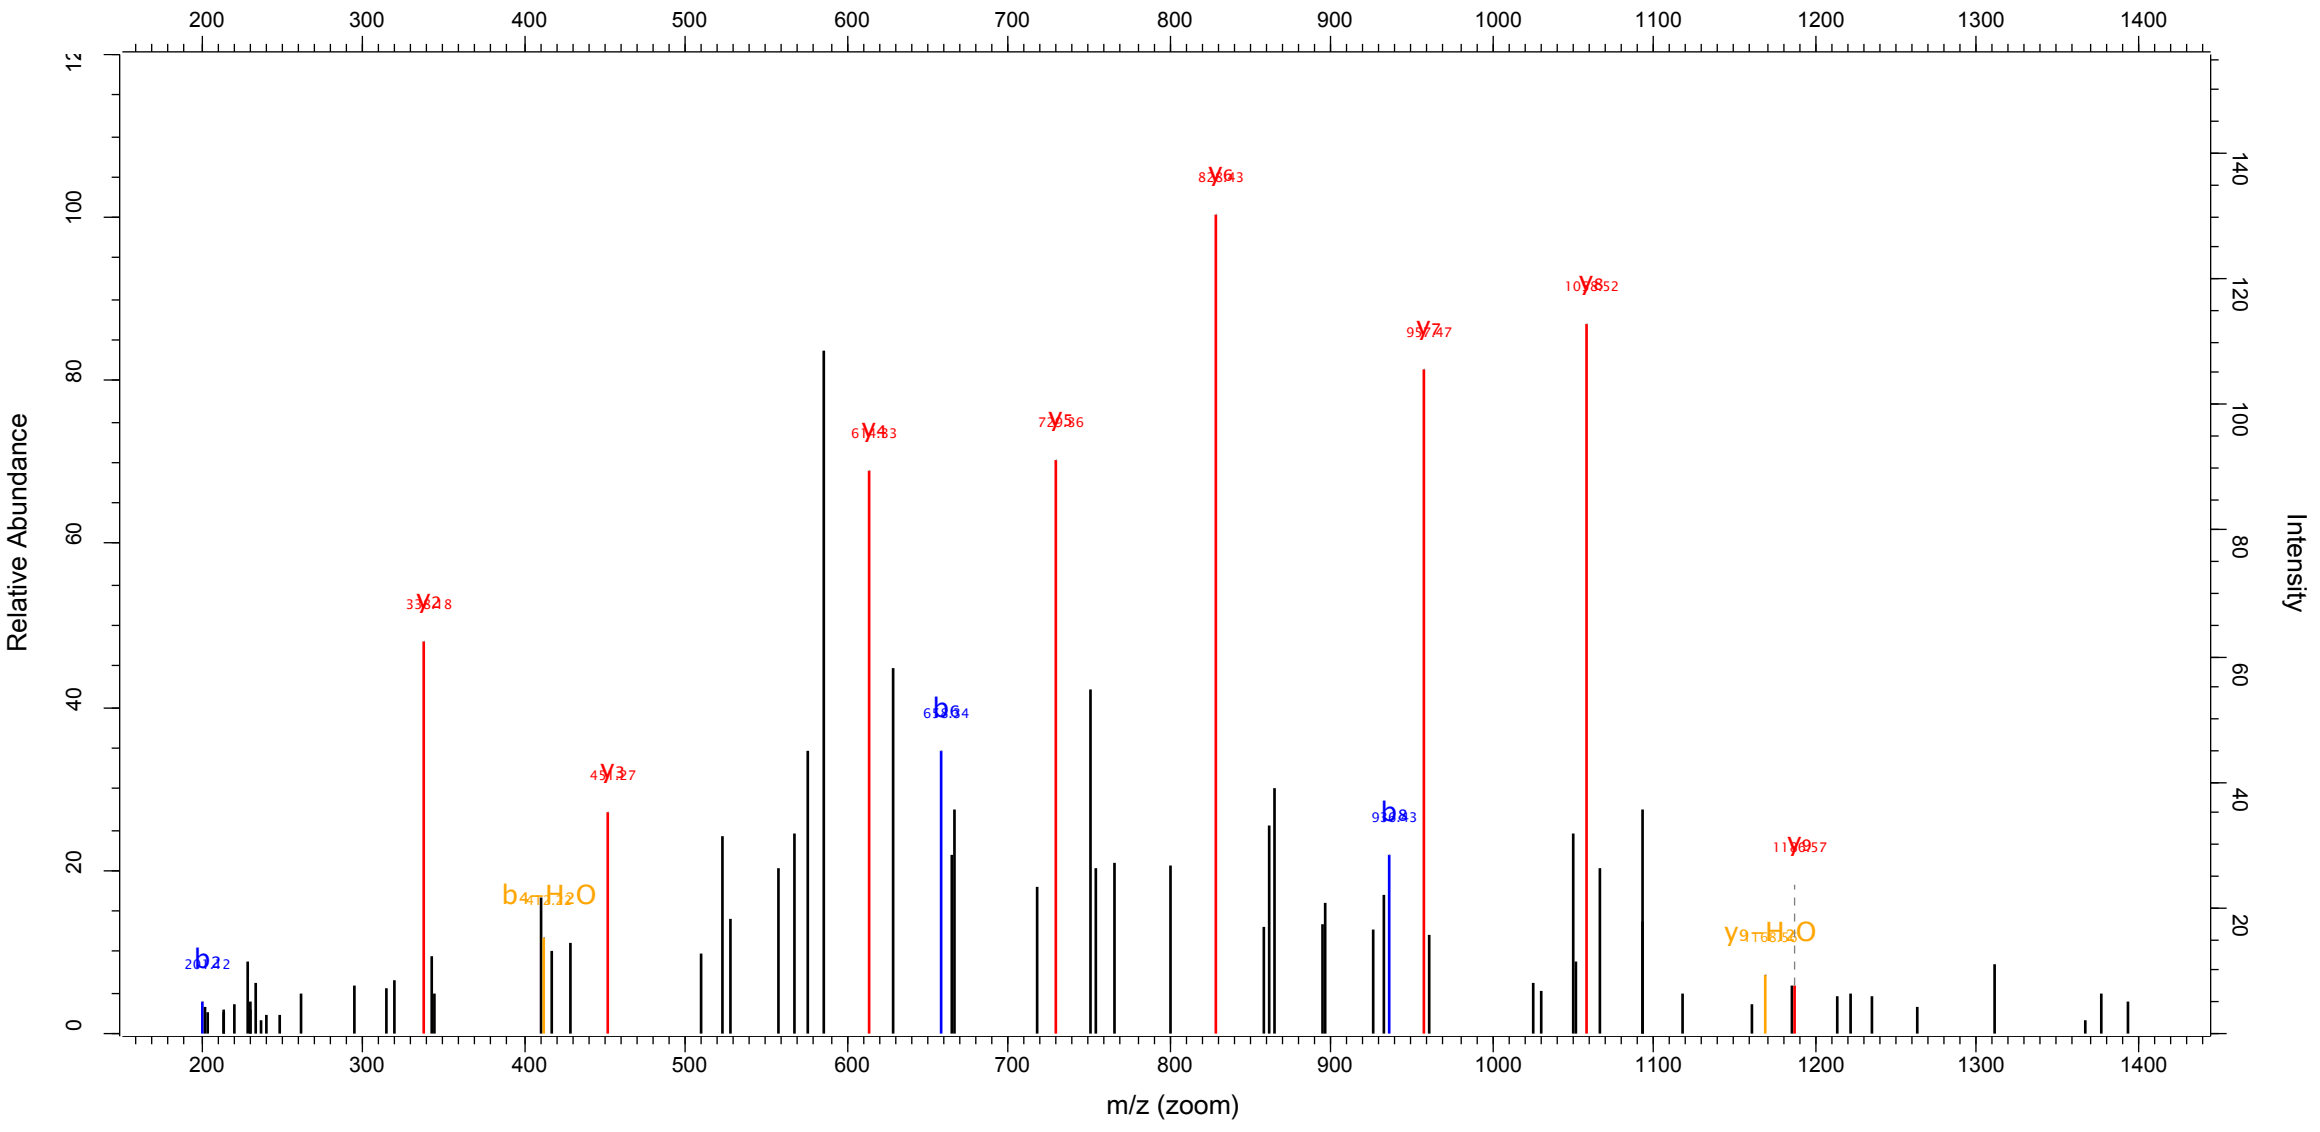

Scan number 28915 Raw file nak\_ubx4LightSAX5\_11 nov05  
 Method ITMS; CID Pepti... 134.56

Protein Group 2817

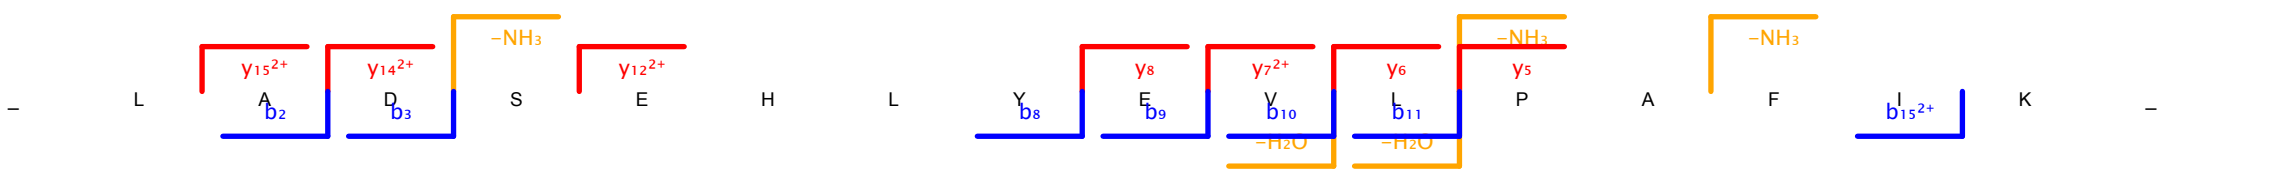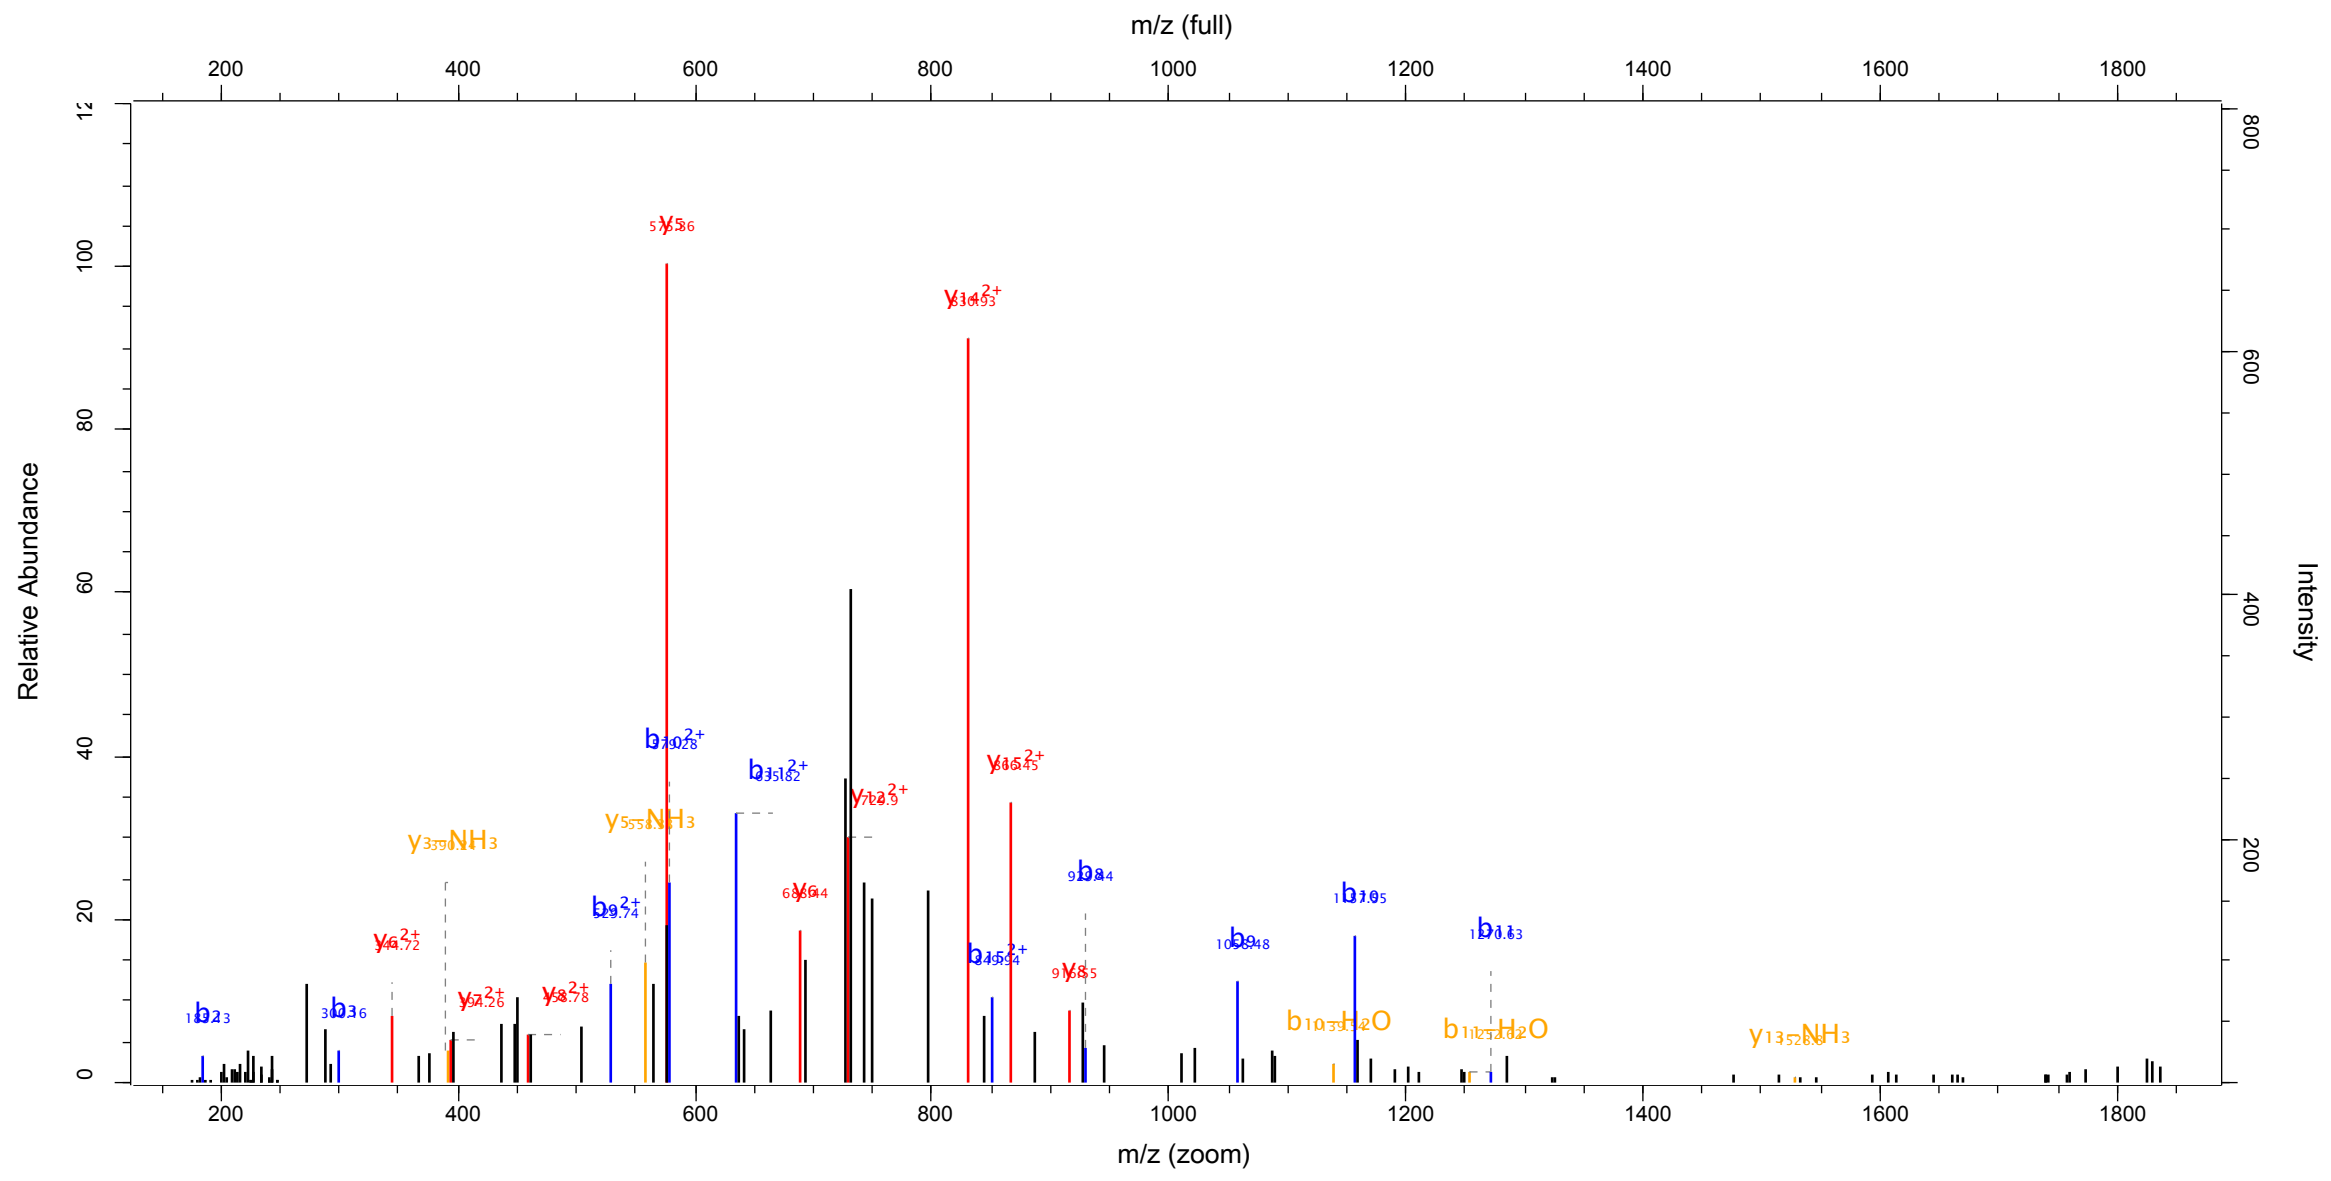

Scan number 11116 Raw file nak\_cdc48UbconjugatesSAX5\_14may10\_09  
 Method ITMS; CID Pepti... 71.56

Protein Group 2848

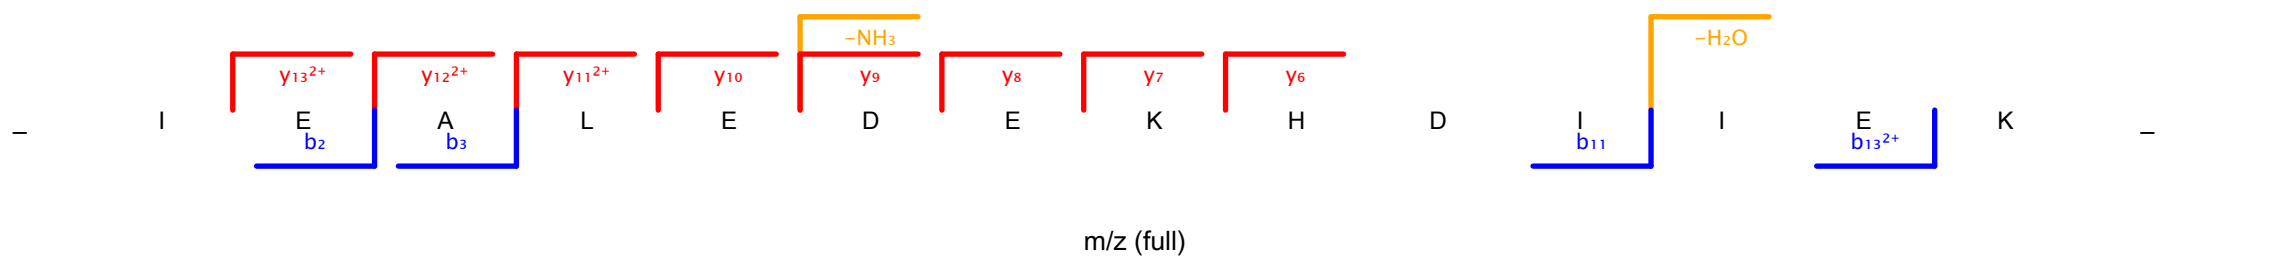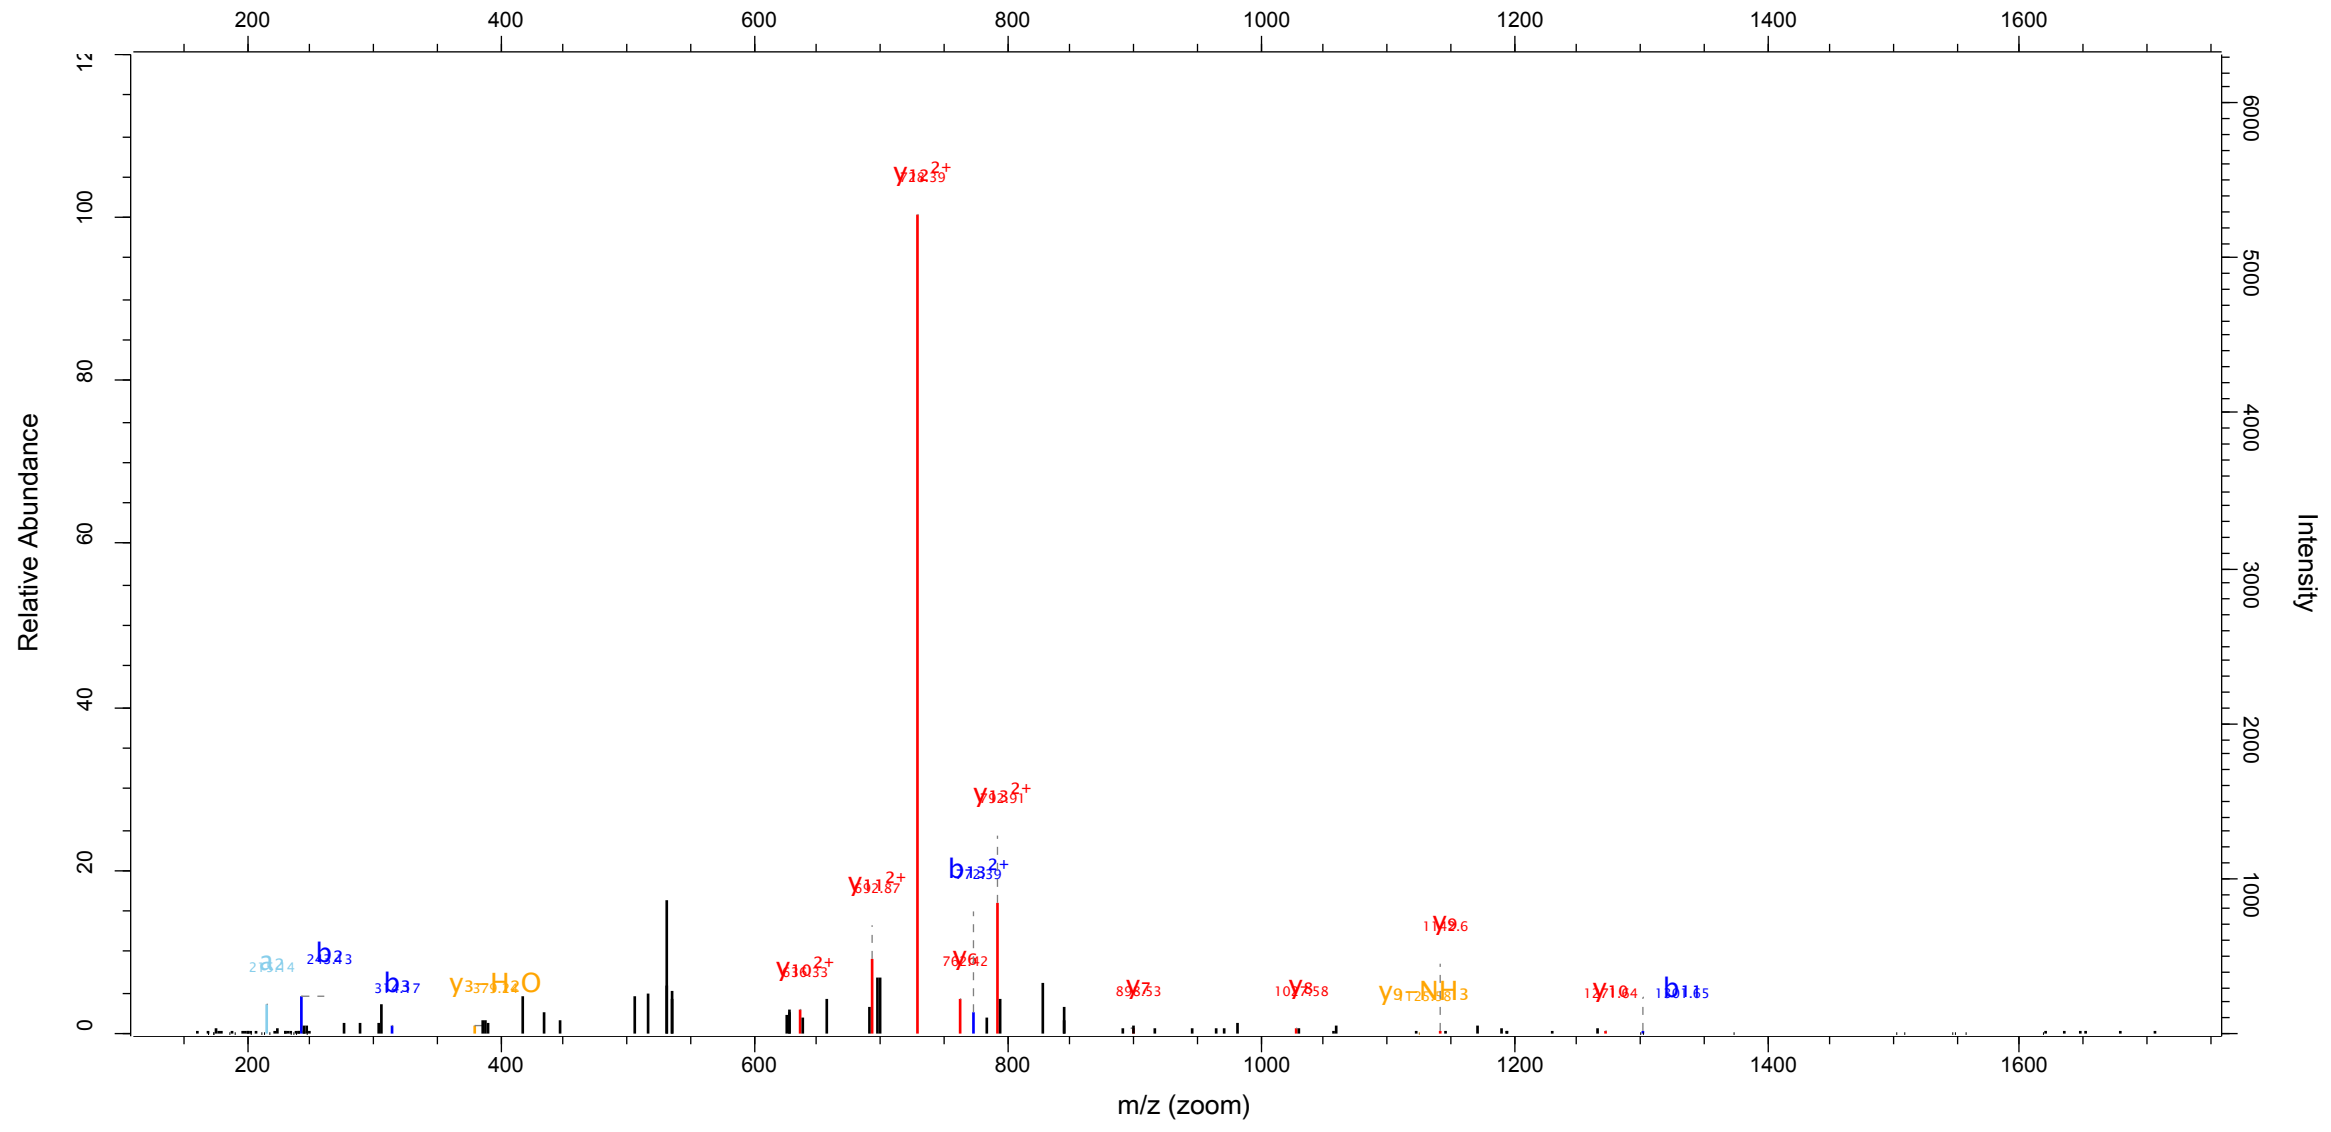

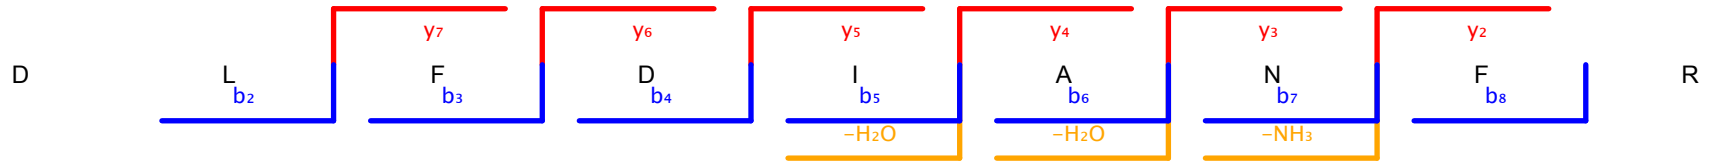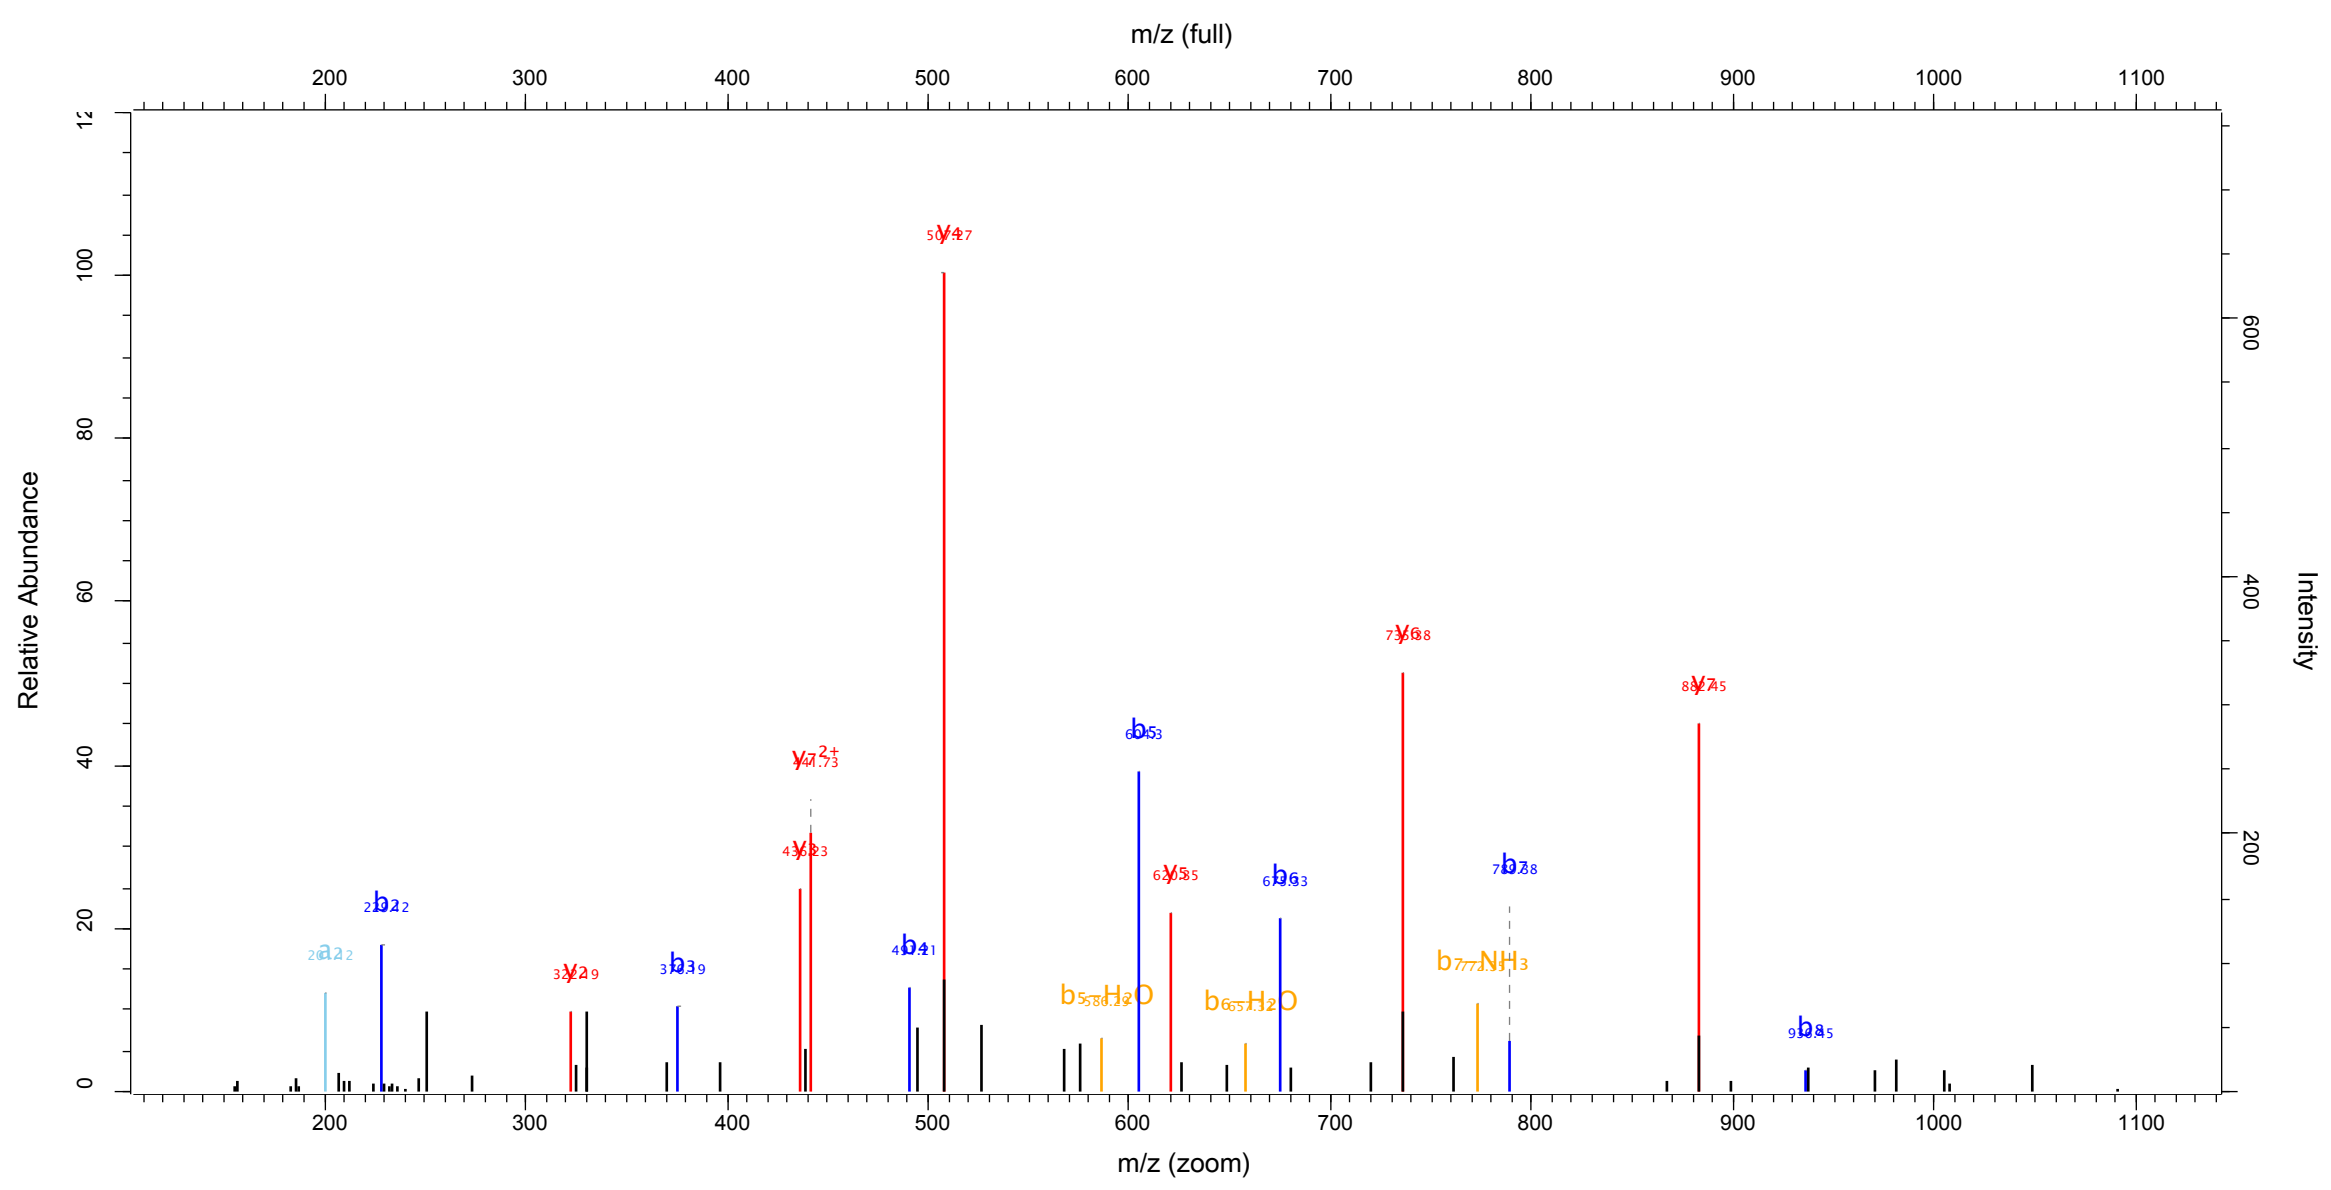

Scan number  
Method

22405  
ITMS; CID

Raw file  
Pepti...

nak\_UBX3LSAX4\_28jan11\_22  
87.18

Protein Group 2876

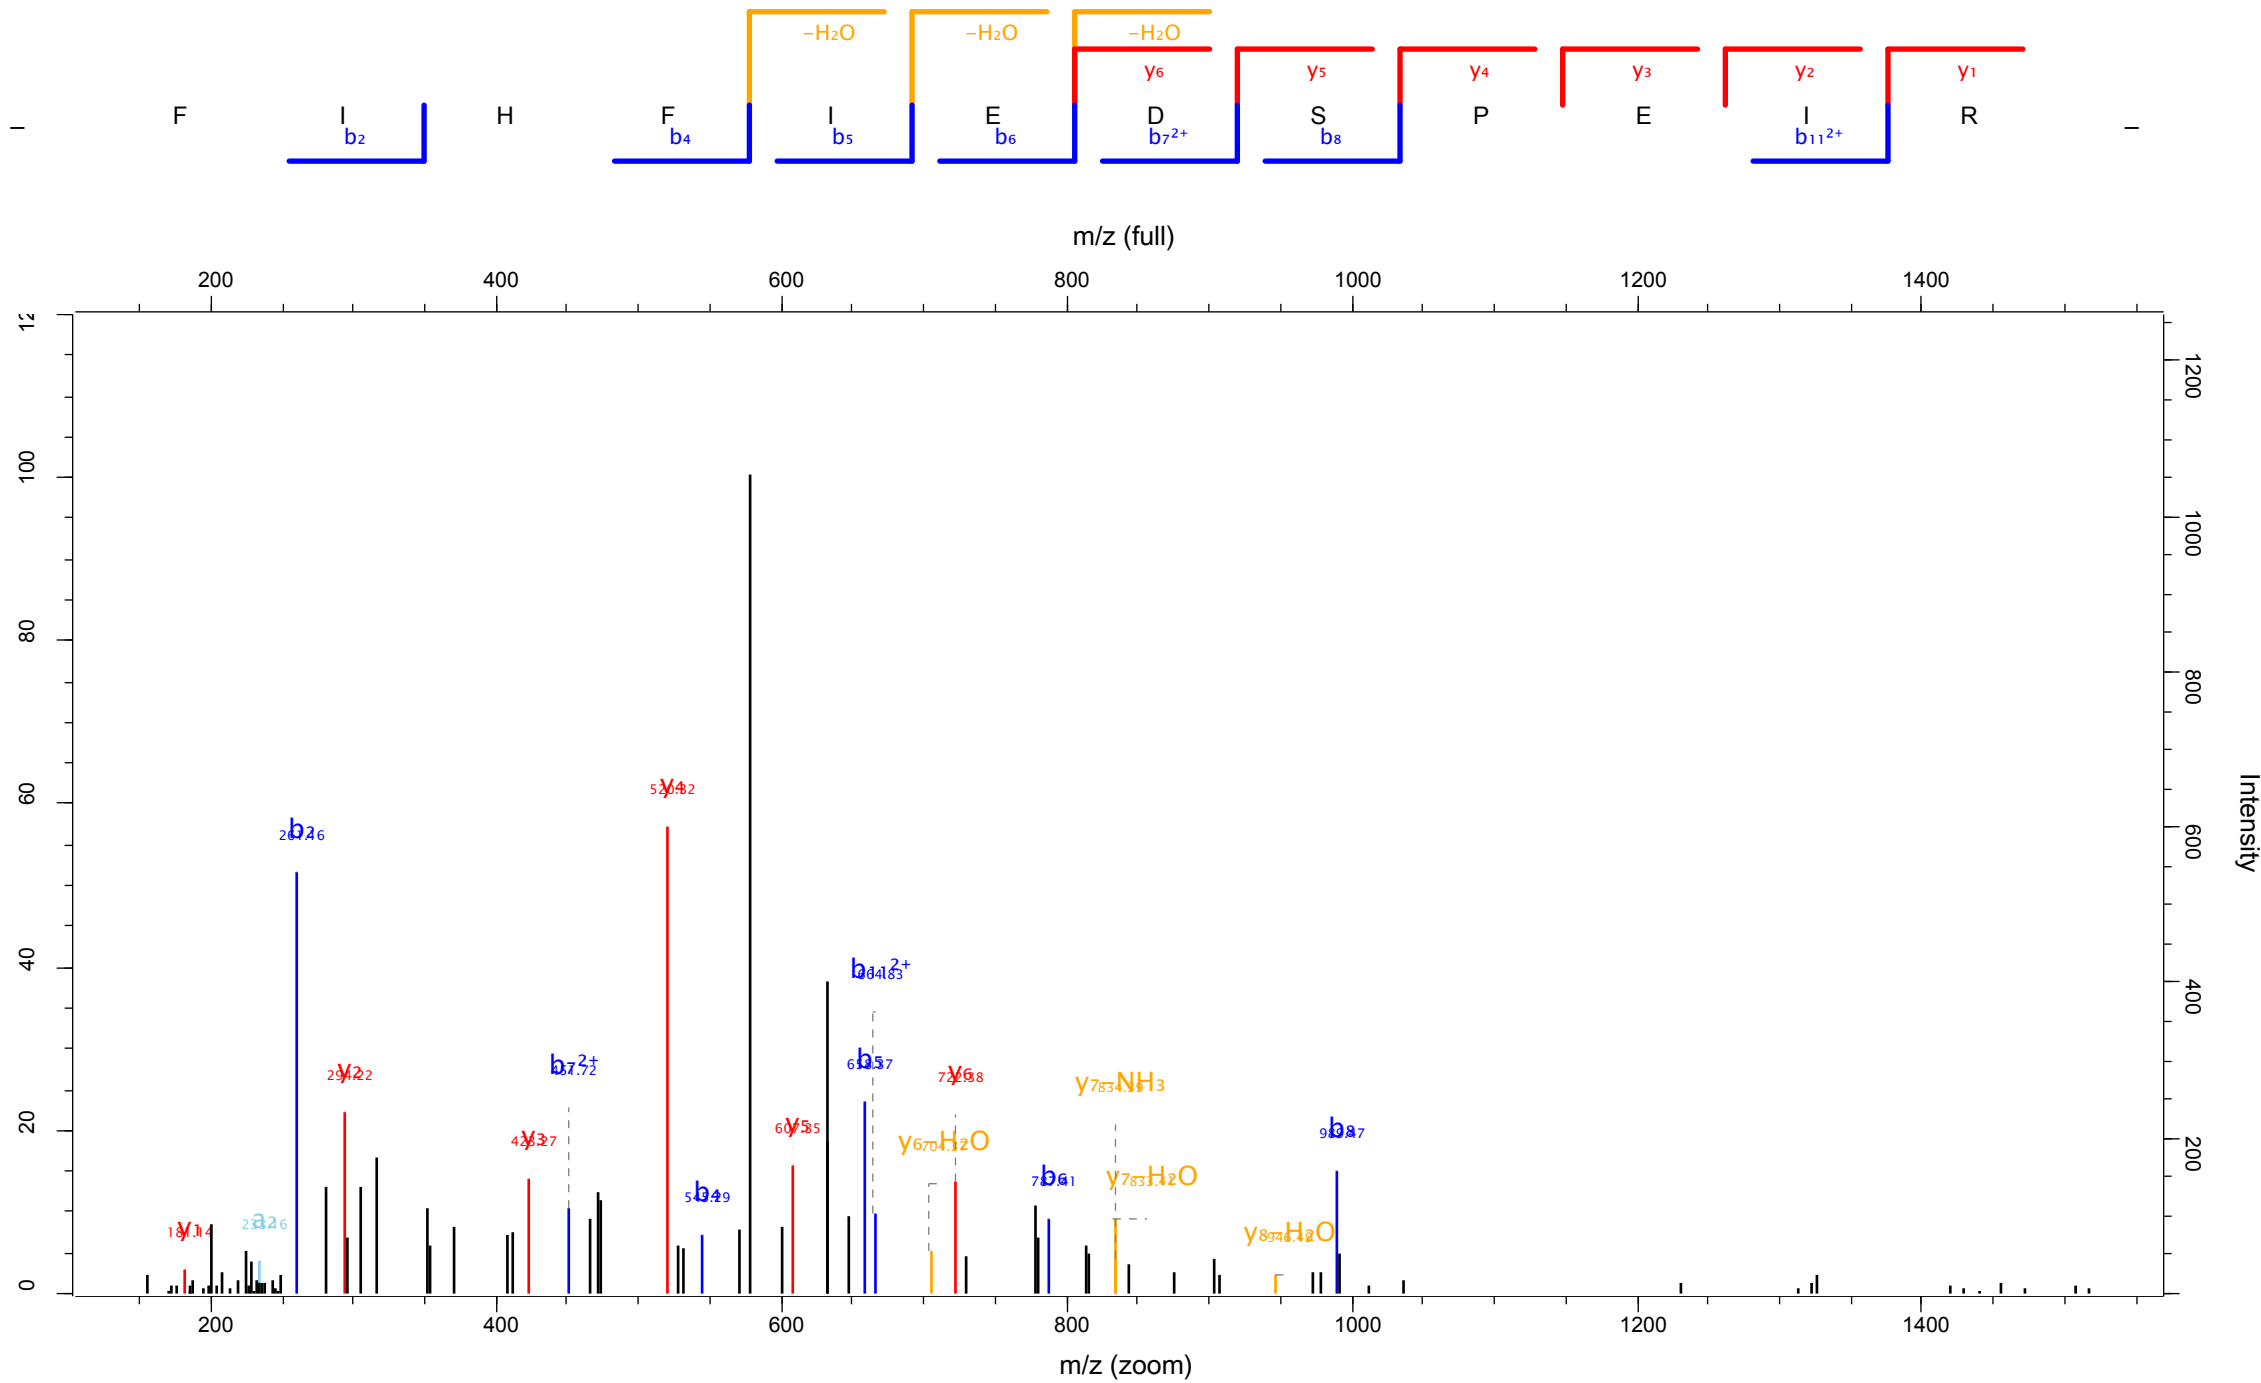

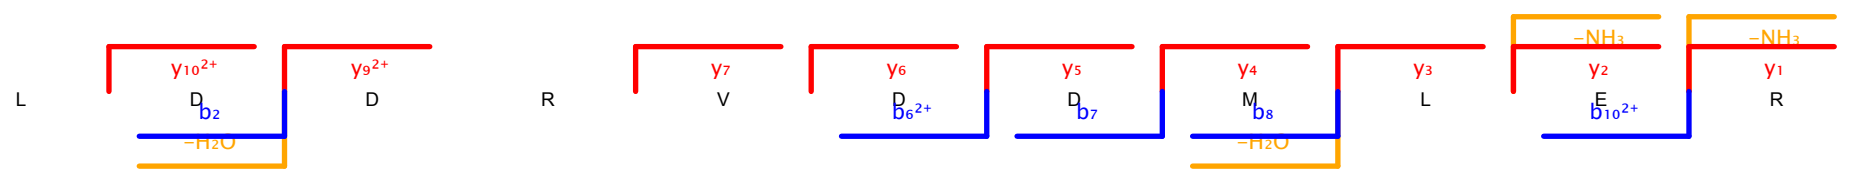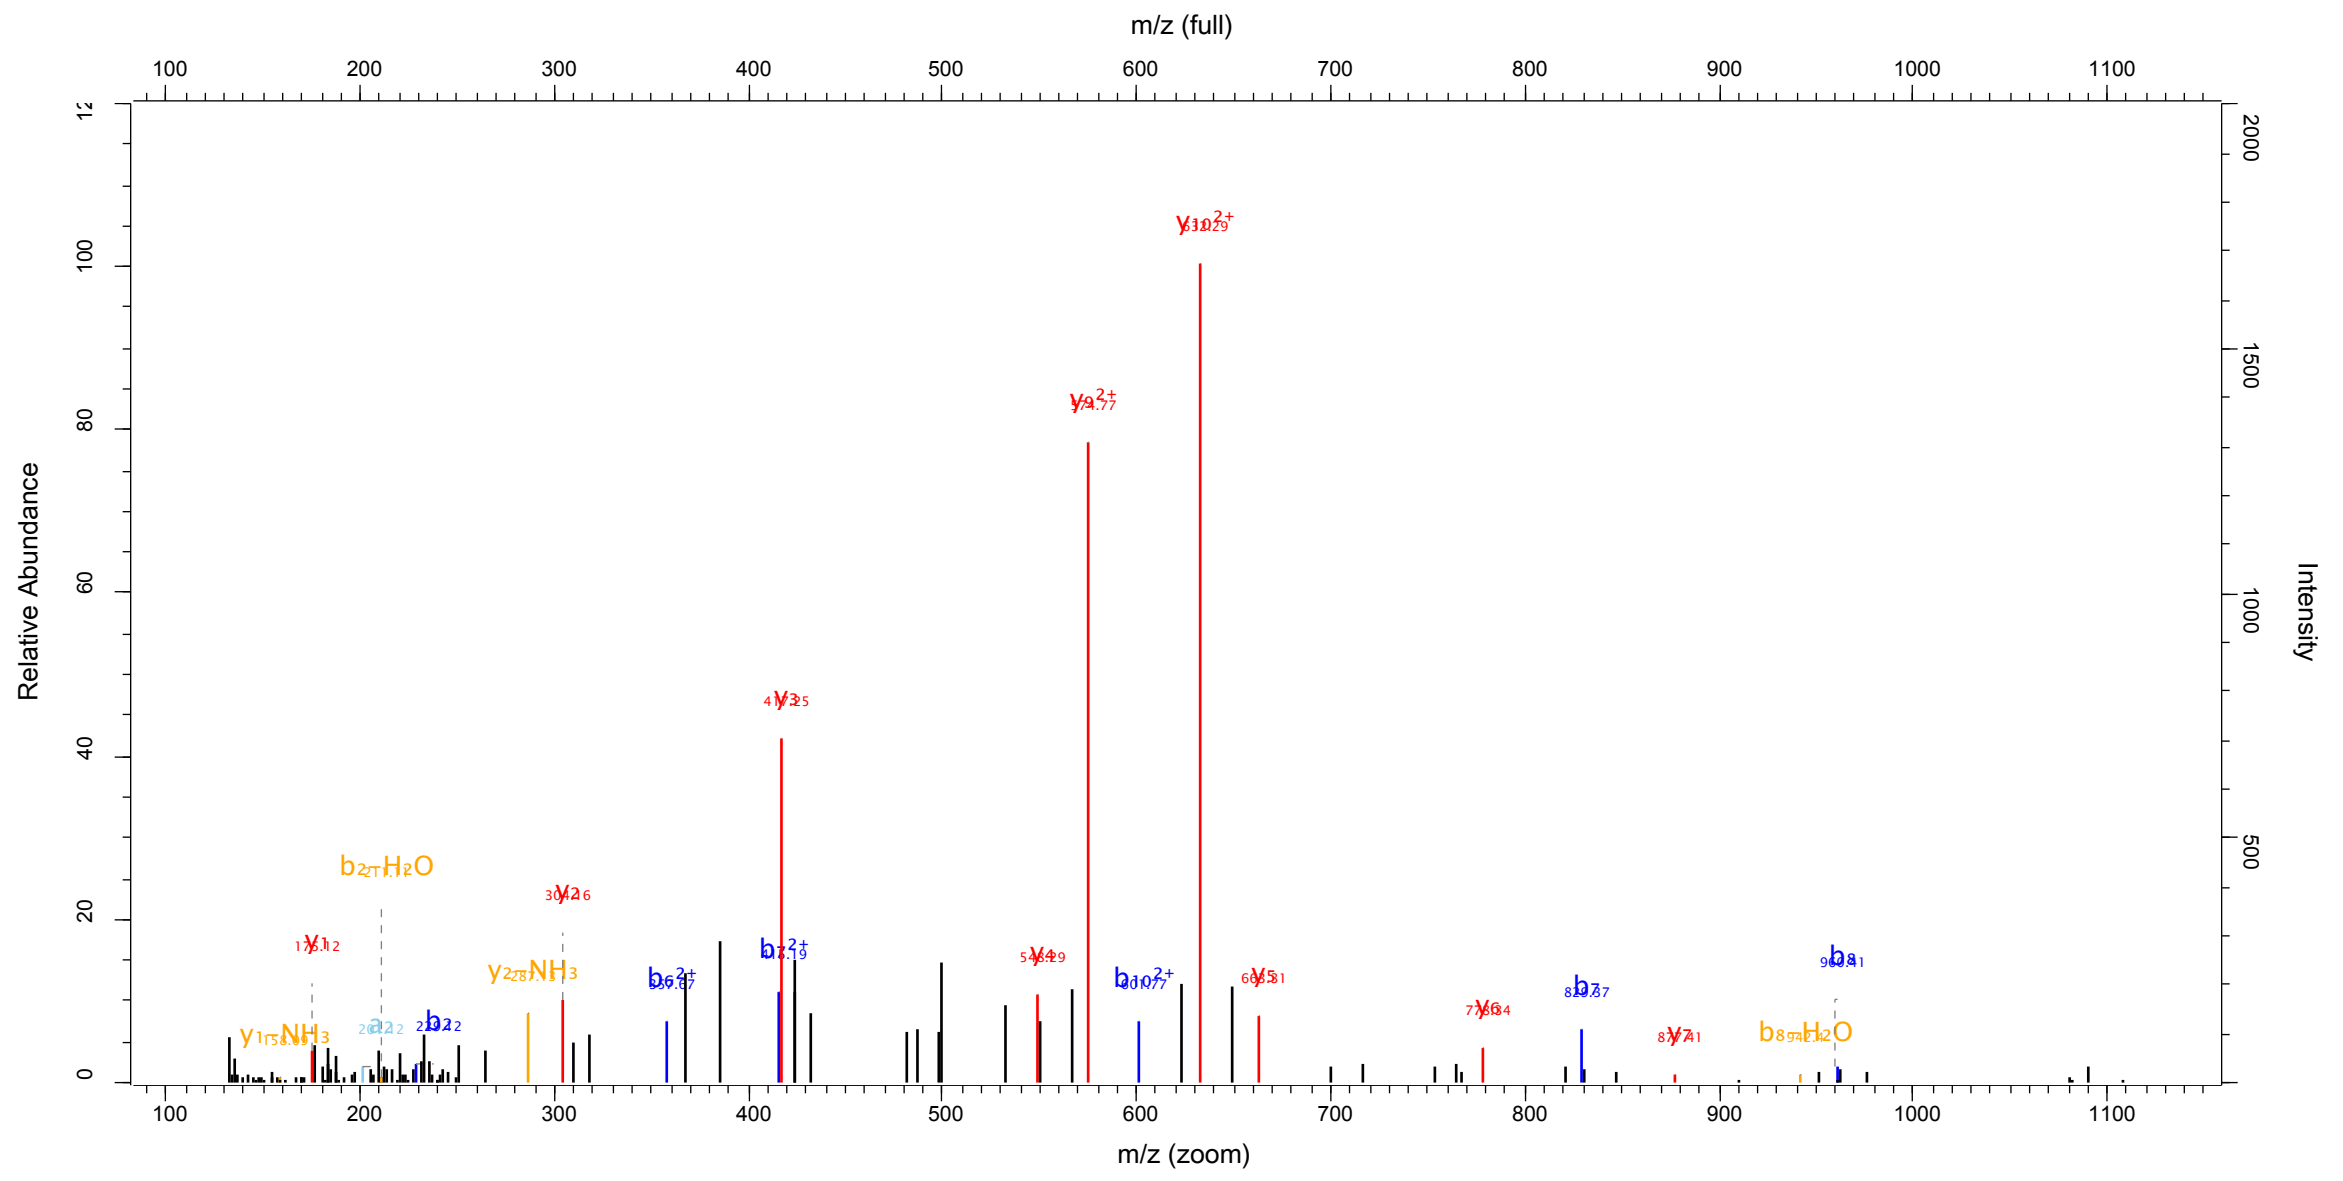



Scan number  
Method

7253  
ITMS; CID

Raw file  
Pepti...

nak\_UBX3LSAX6\_28jan11\_24  
188.4

Protein Group 2939

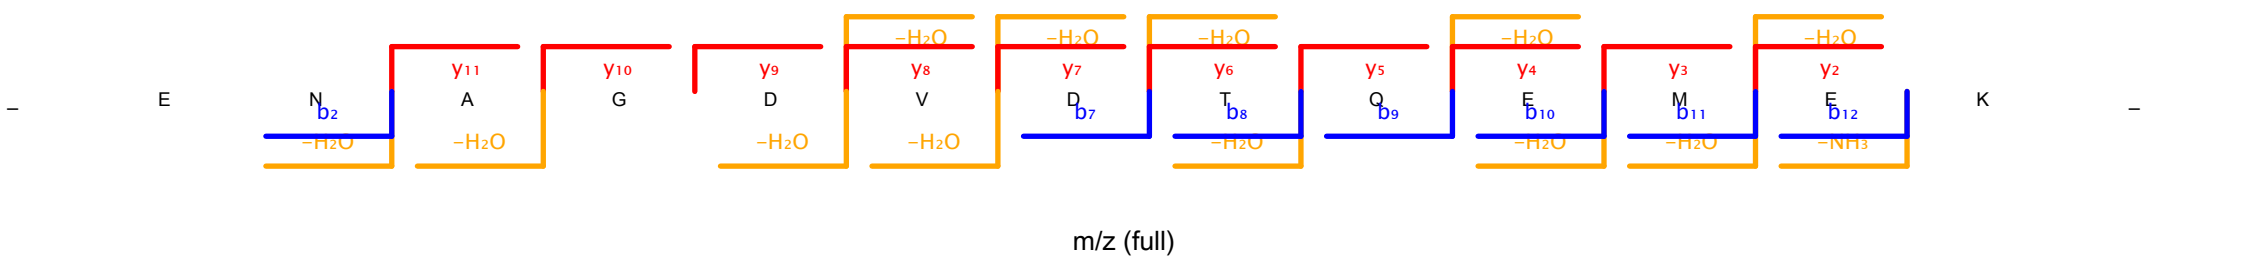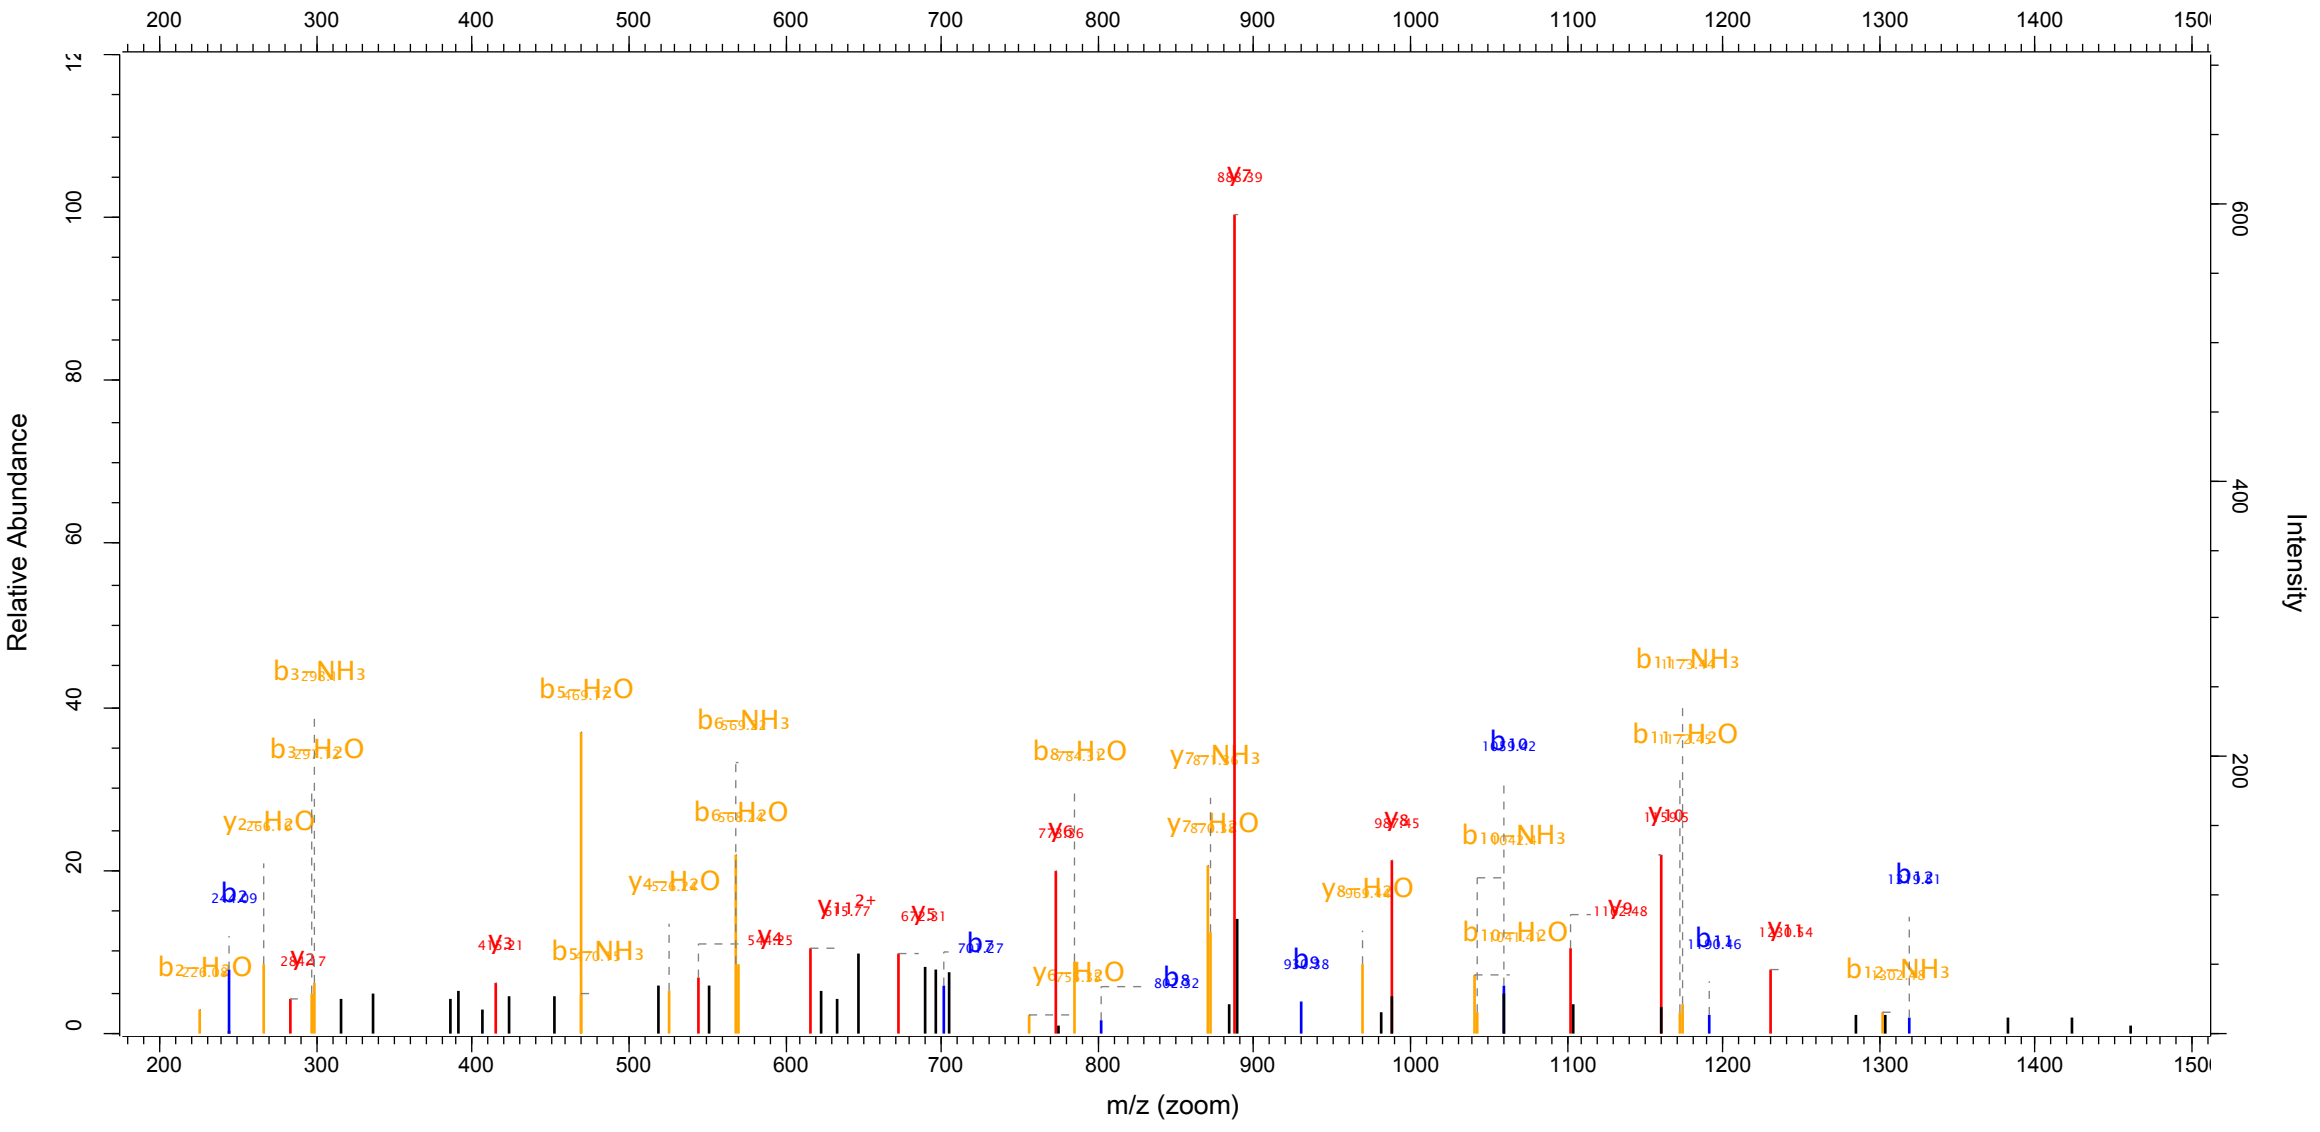

Scan number 9323 Raw file nak\_cdc48UbconjugatecontrolSAX6\_21 may25\_100524125641  
 Method ITMS; CID Pepti... 261.41

Protein Group 2969

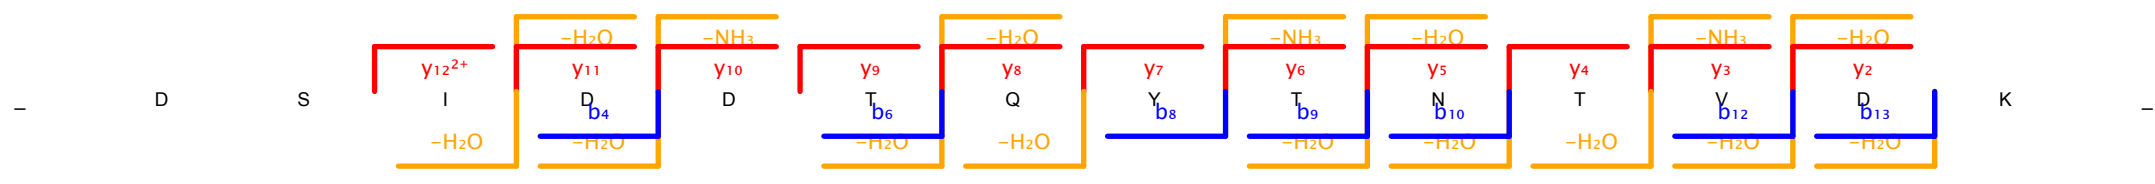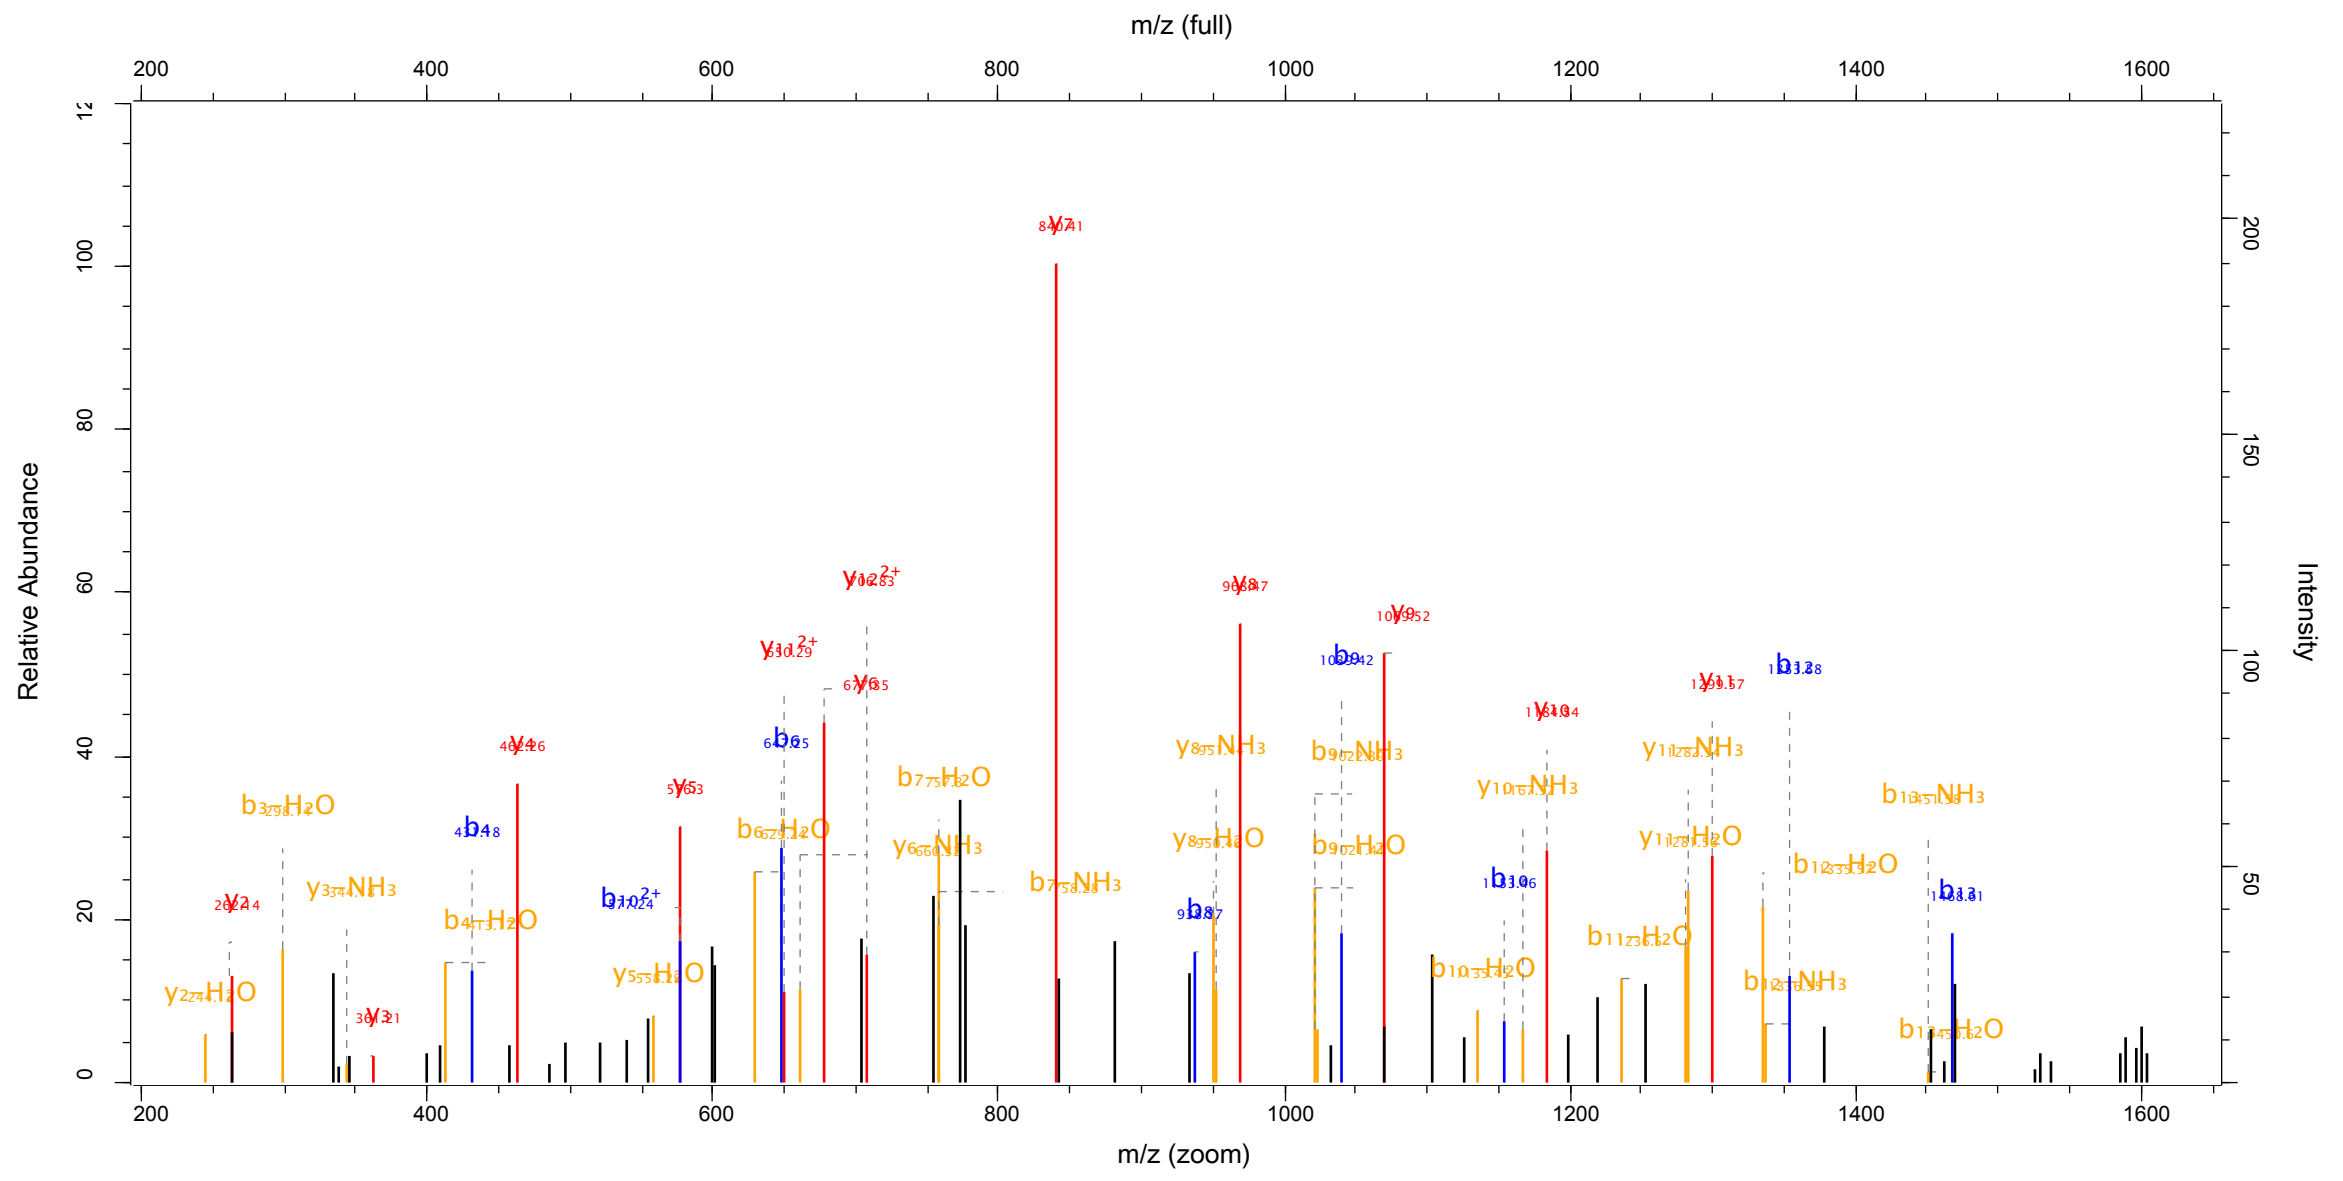

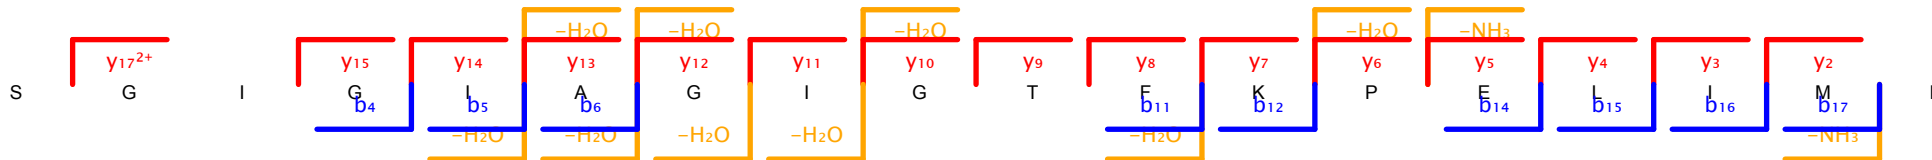

m/z (full)

400 600 800 1000 1200 1400 1600 1800

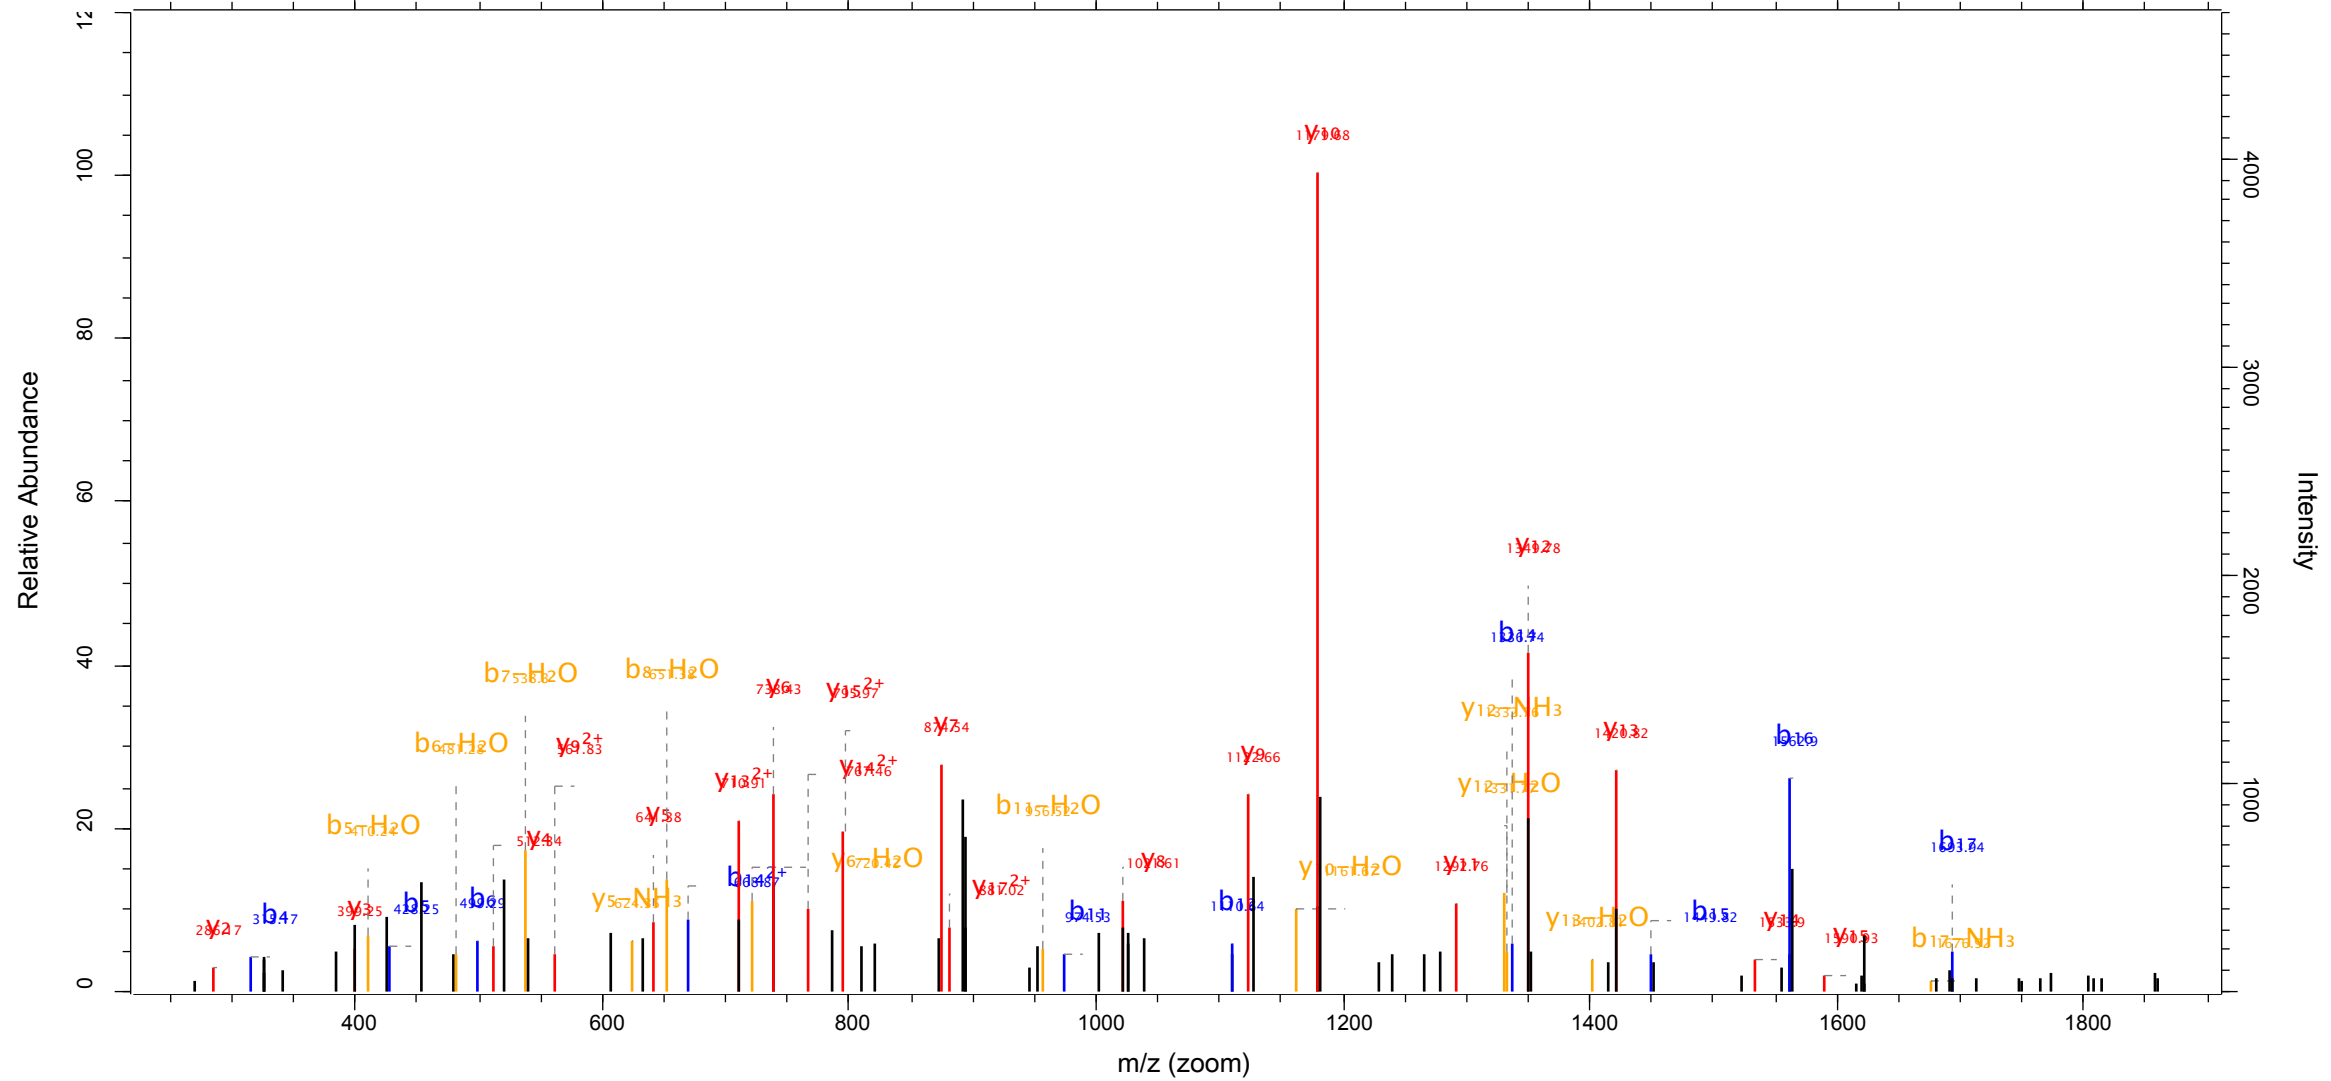

Scan number  
Method

22318  
ITMS; CID

Raw file  
Pepti...

nak\_UBX6SAX4L\_14jan11\_14  
129.82

Protein Group 3056

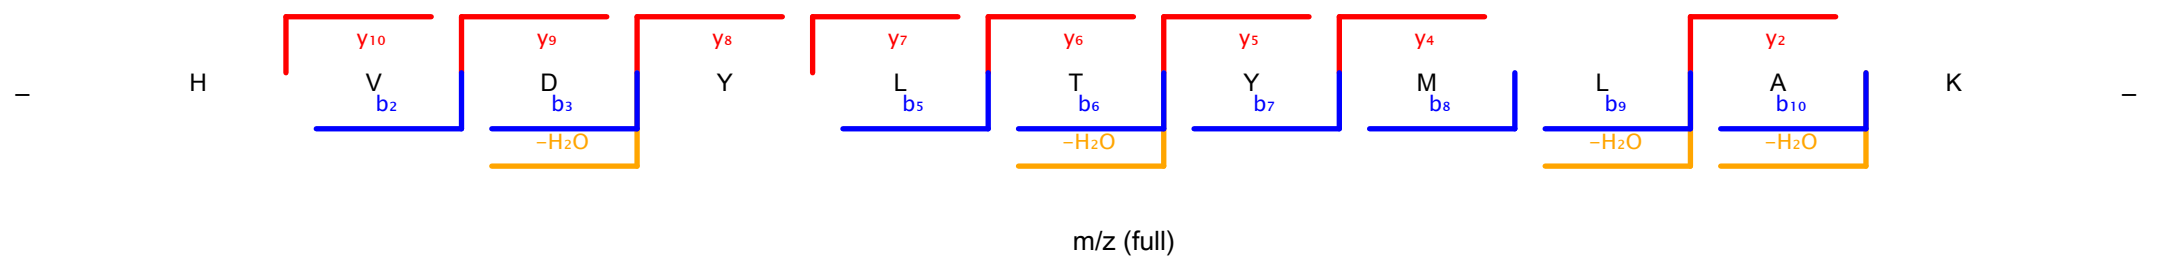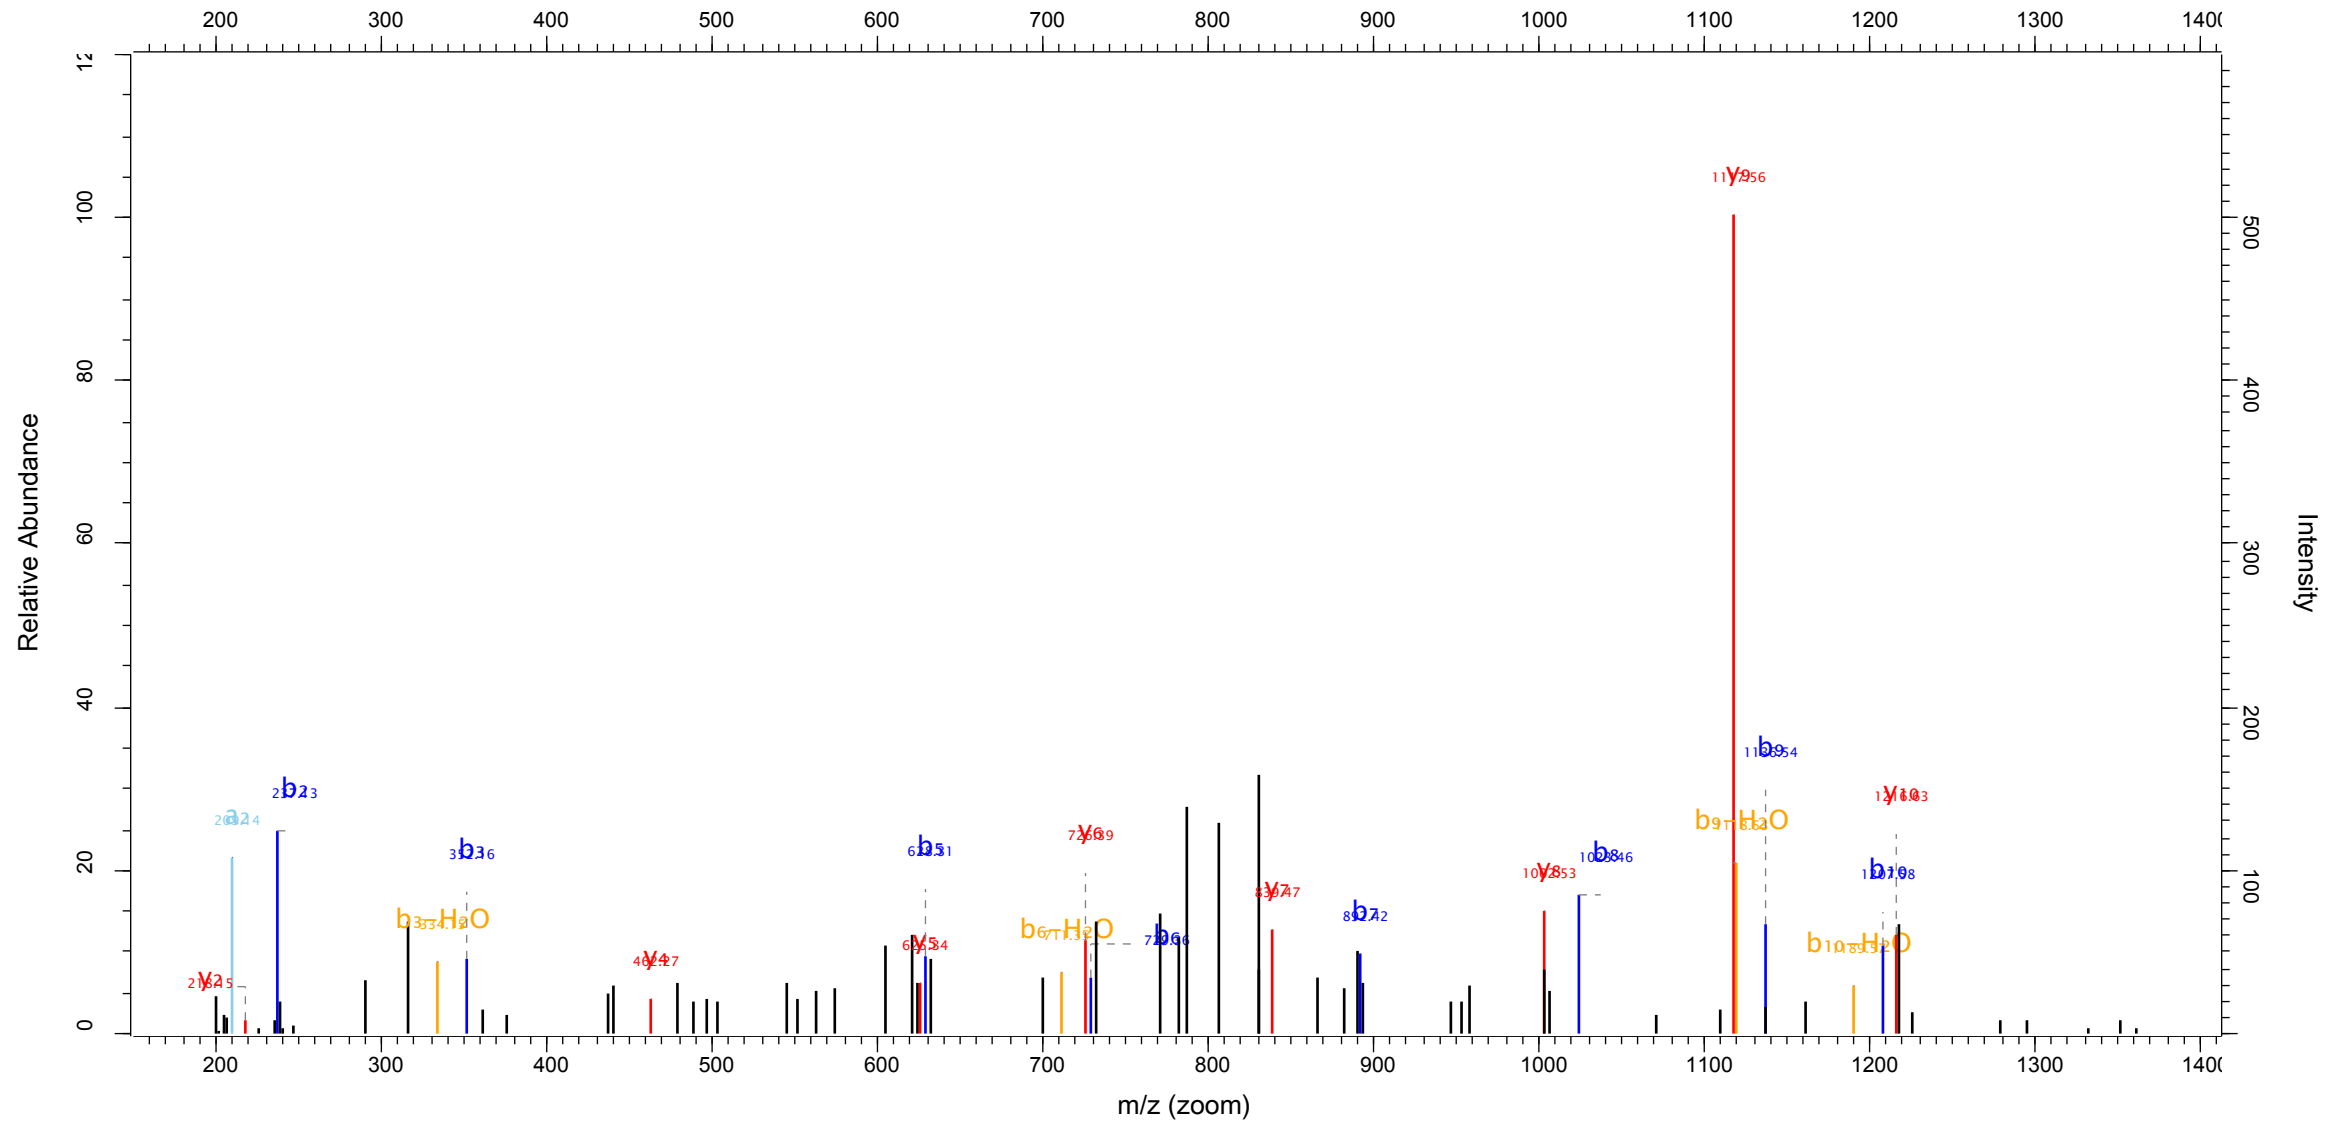

Scan number 31392 Raw file nak\_ubx5H\_SAX2\_17Sep2  
 Method ITMS; CID Pepti... 104.95

Protein Group 3061

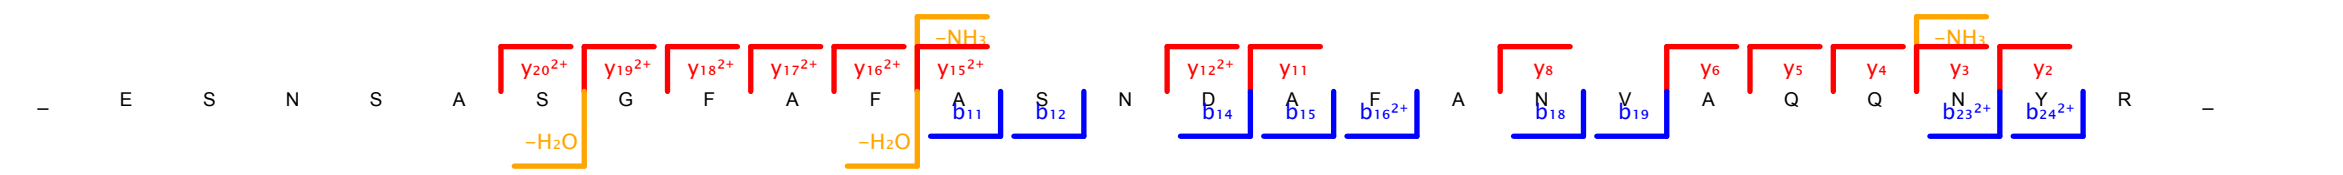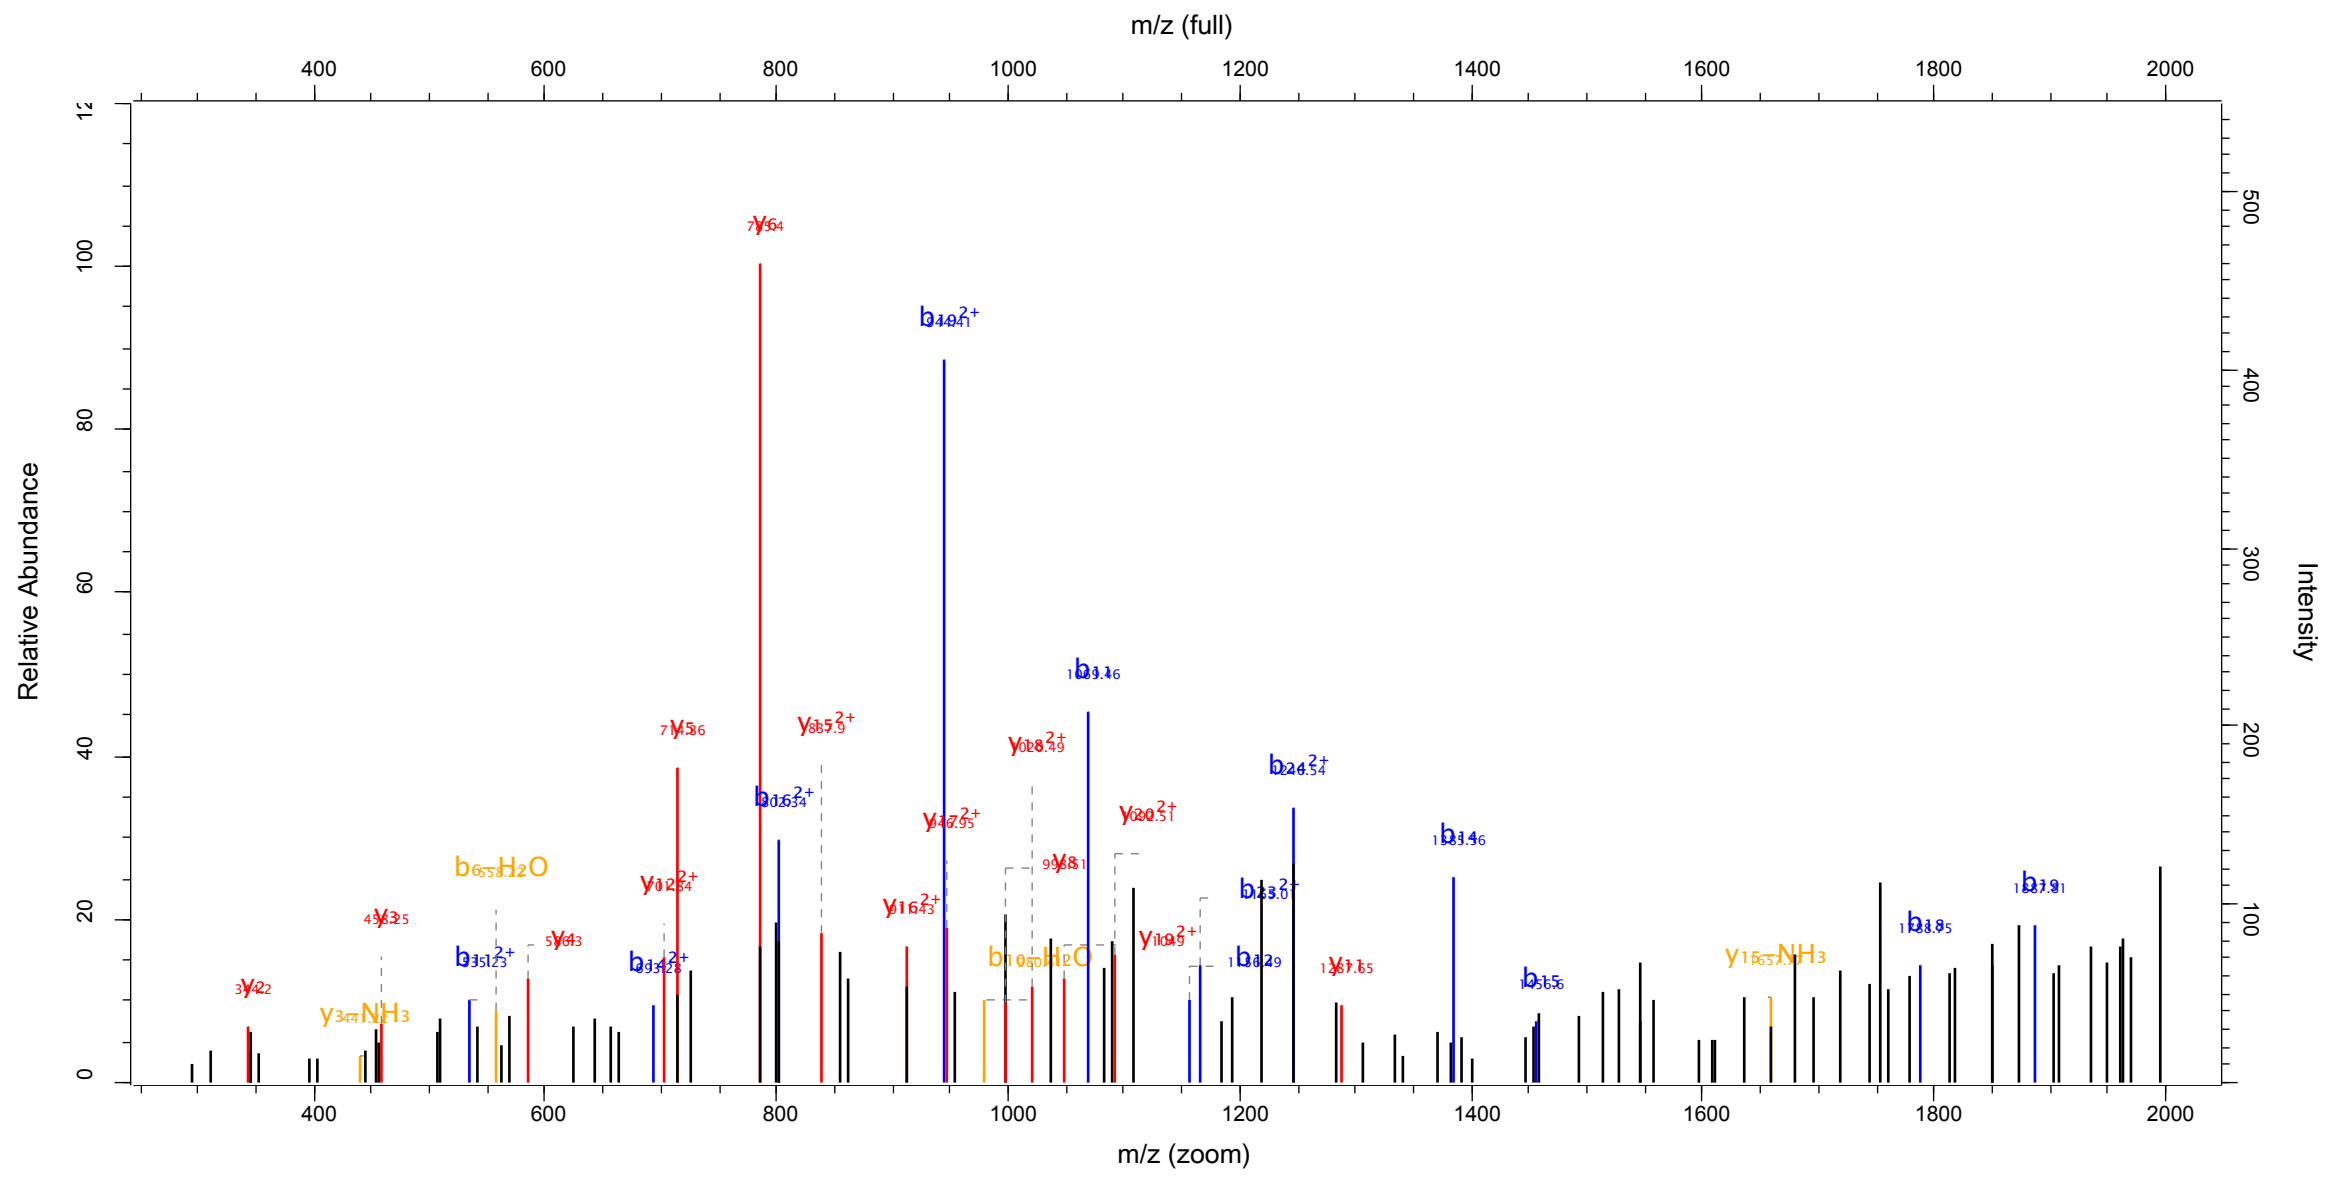

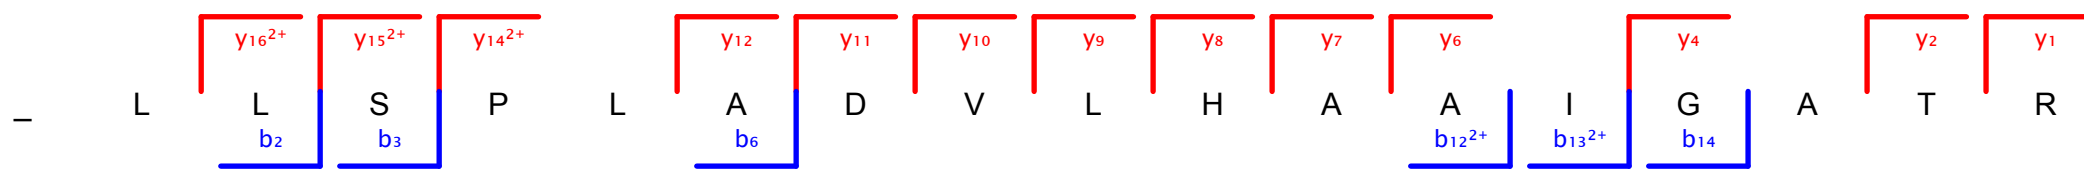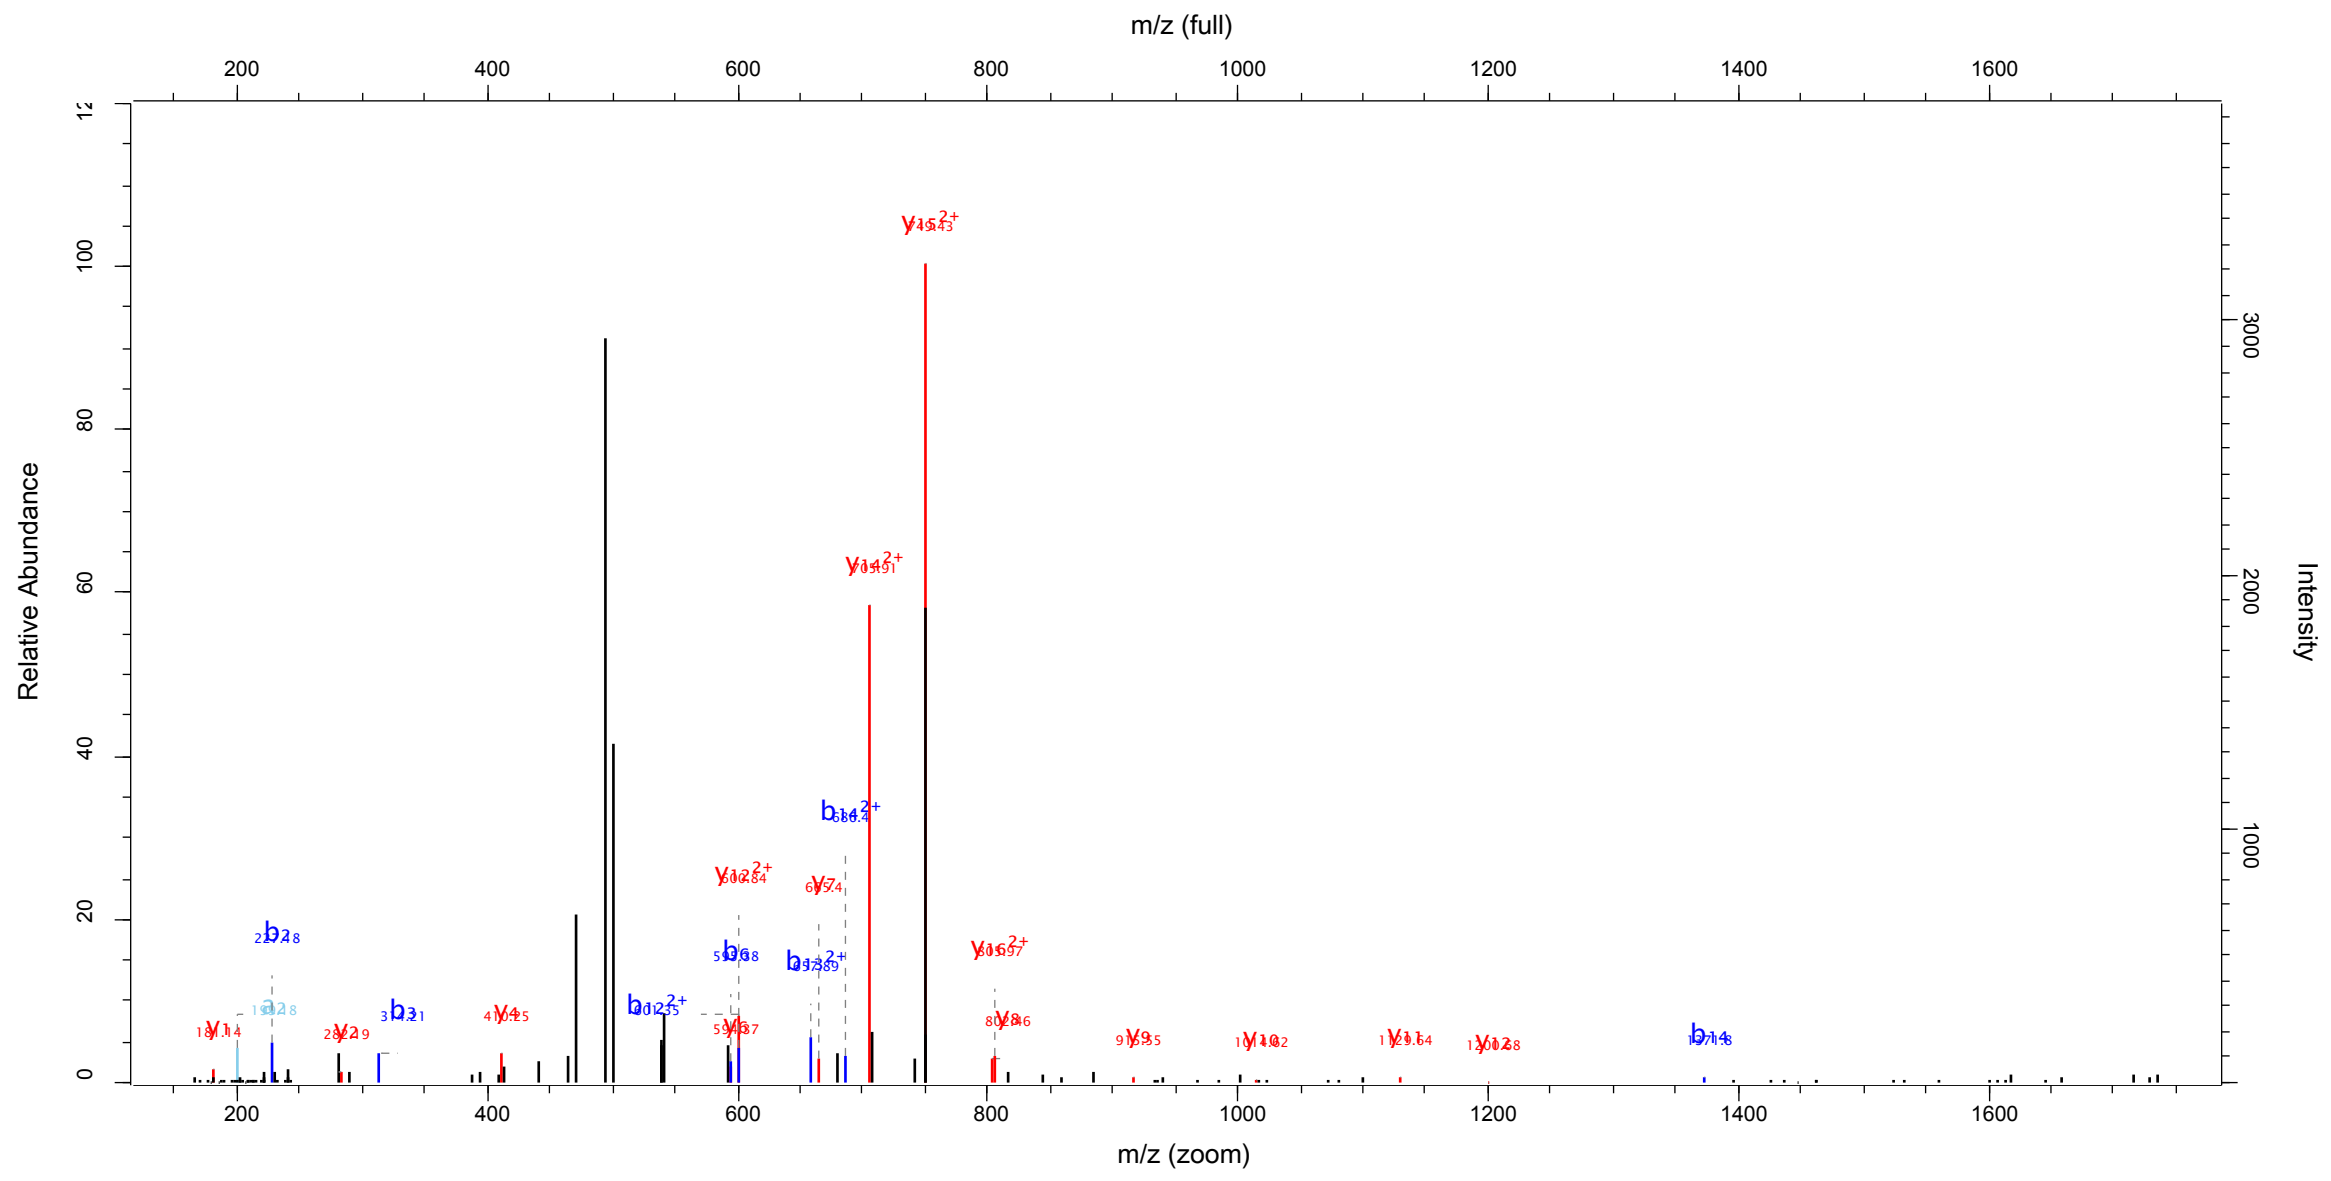

Scan number 41133 Raw file nak\_cdc48UbconjugatesSAX1\_21may12  
 Method ITMS; CID Pepti... 142.1

Protein Group 3081

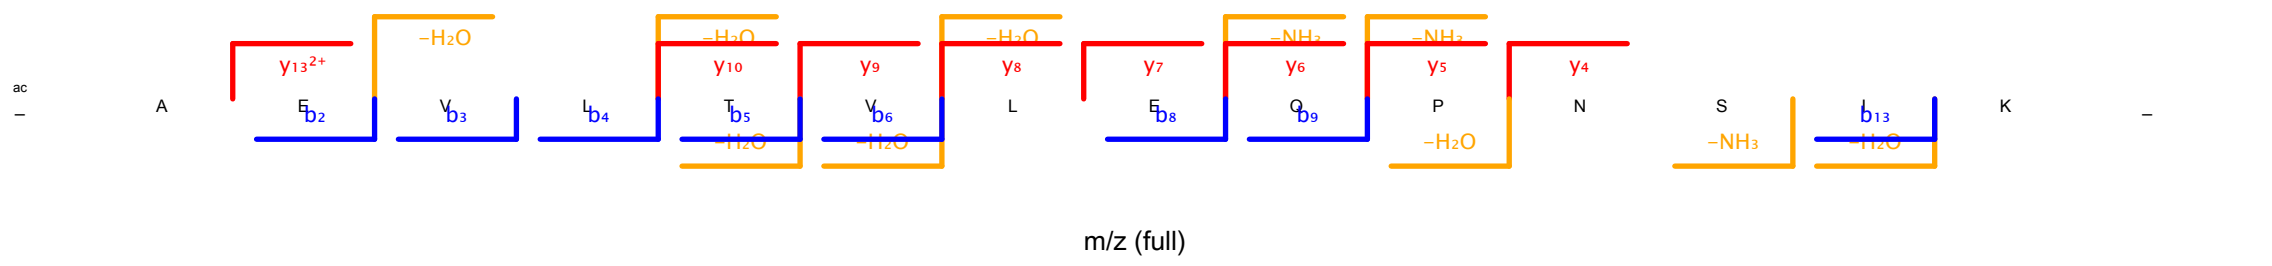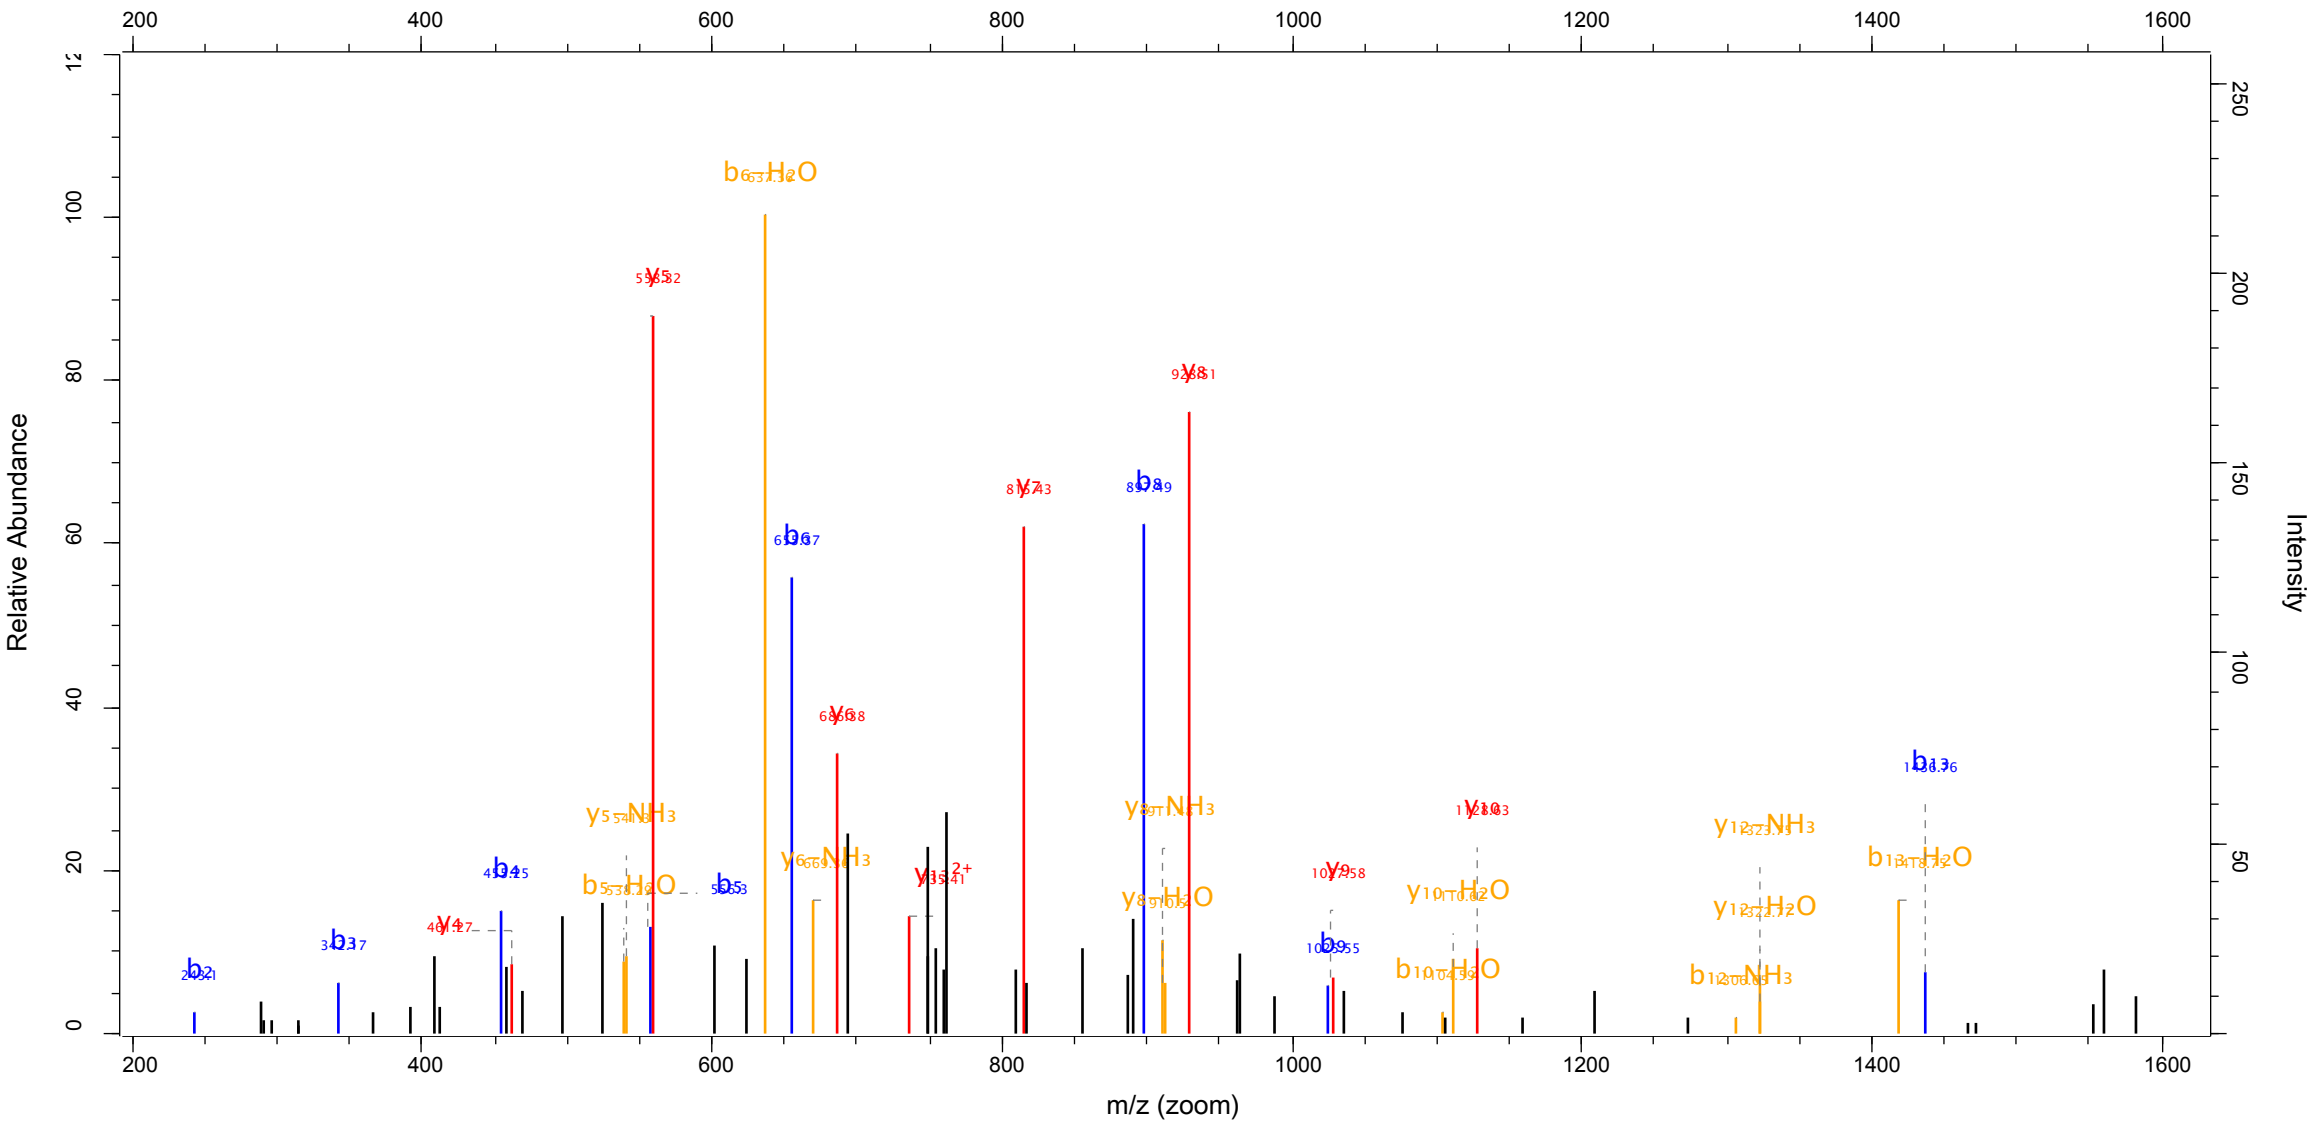

Scan number 19097 Raw file nak\_UBX3HSAX4\_28jan11\_30  
 Method ITMS; CID Pepti... 110.53

Protein Group 3097

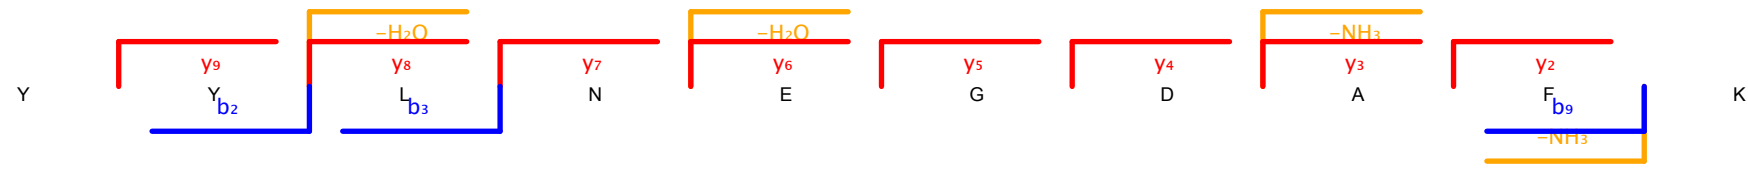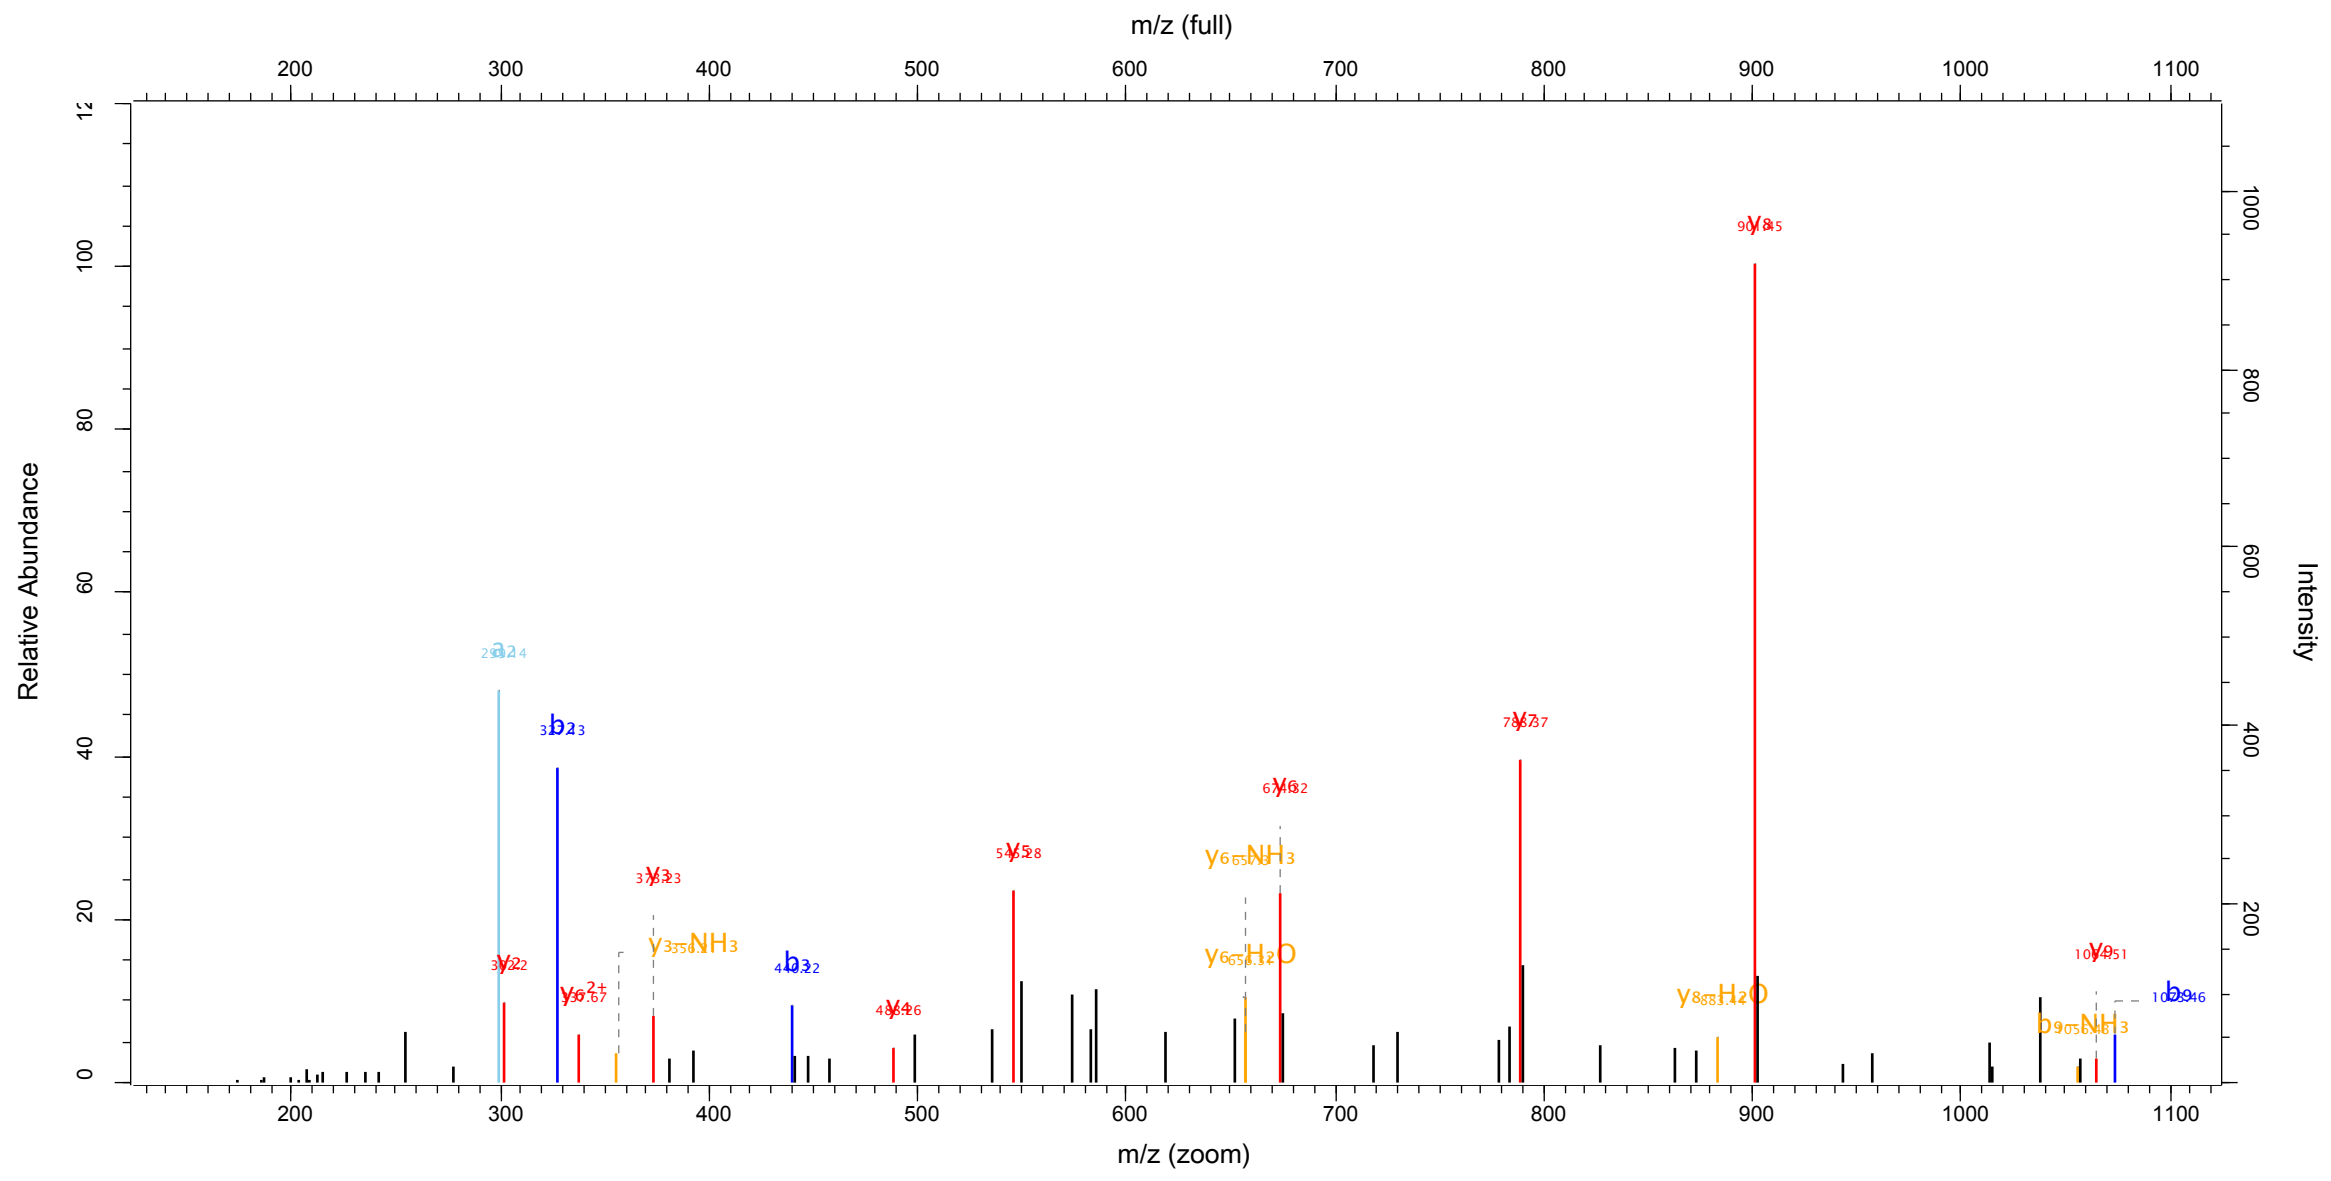



Scan number

6591

Raw file

nak\_UBX3HSAX5\_28jan11\_31

Protein Group 3169

Method

ITMS; CID

Pepti...

75.48

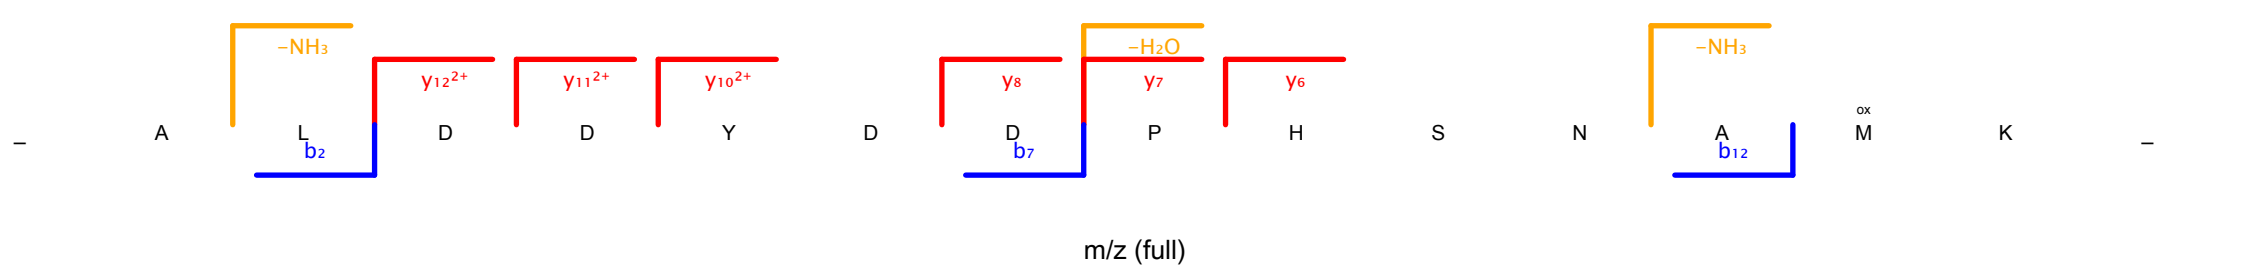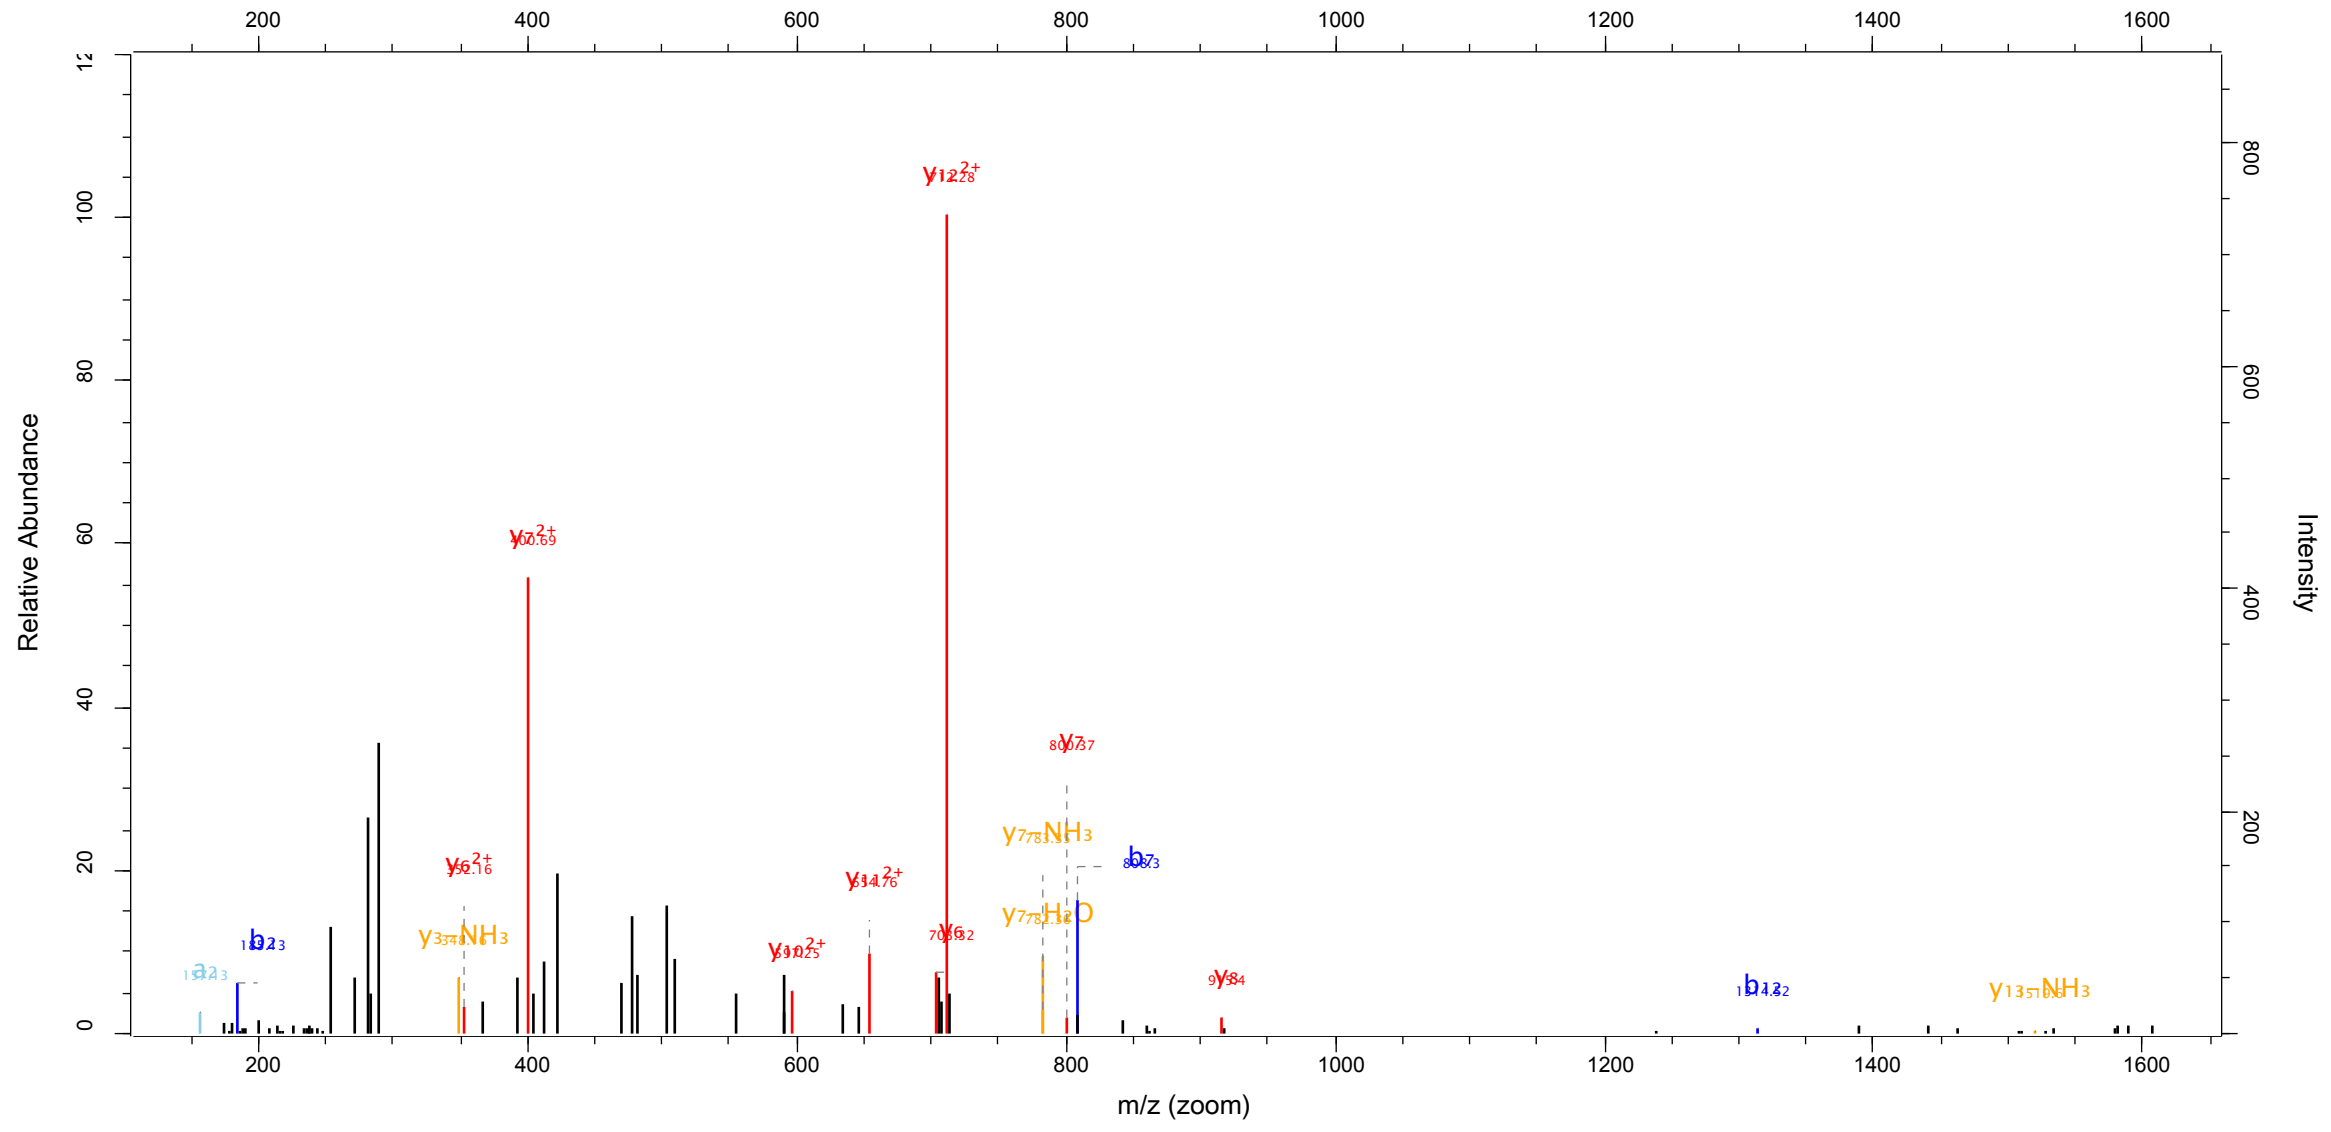

Supplement: supp_M113.030163_mcp.M113.030163-4.pdf [file supp_M113.030163_mcp.M113.030163-4.pdf]
