# Supplementary material
Source: PubMed Central journal article supplement (PMC3790291)

Scan number 8487 Raw file nak\_WTonetoneSAX5\_4feb11\_05  
 Method ITMS; CID Pepti... 139.86

GlyGly Site Id 0

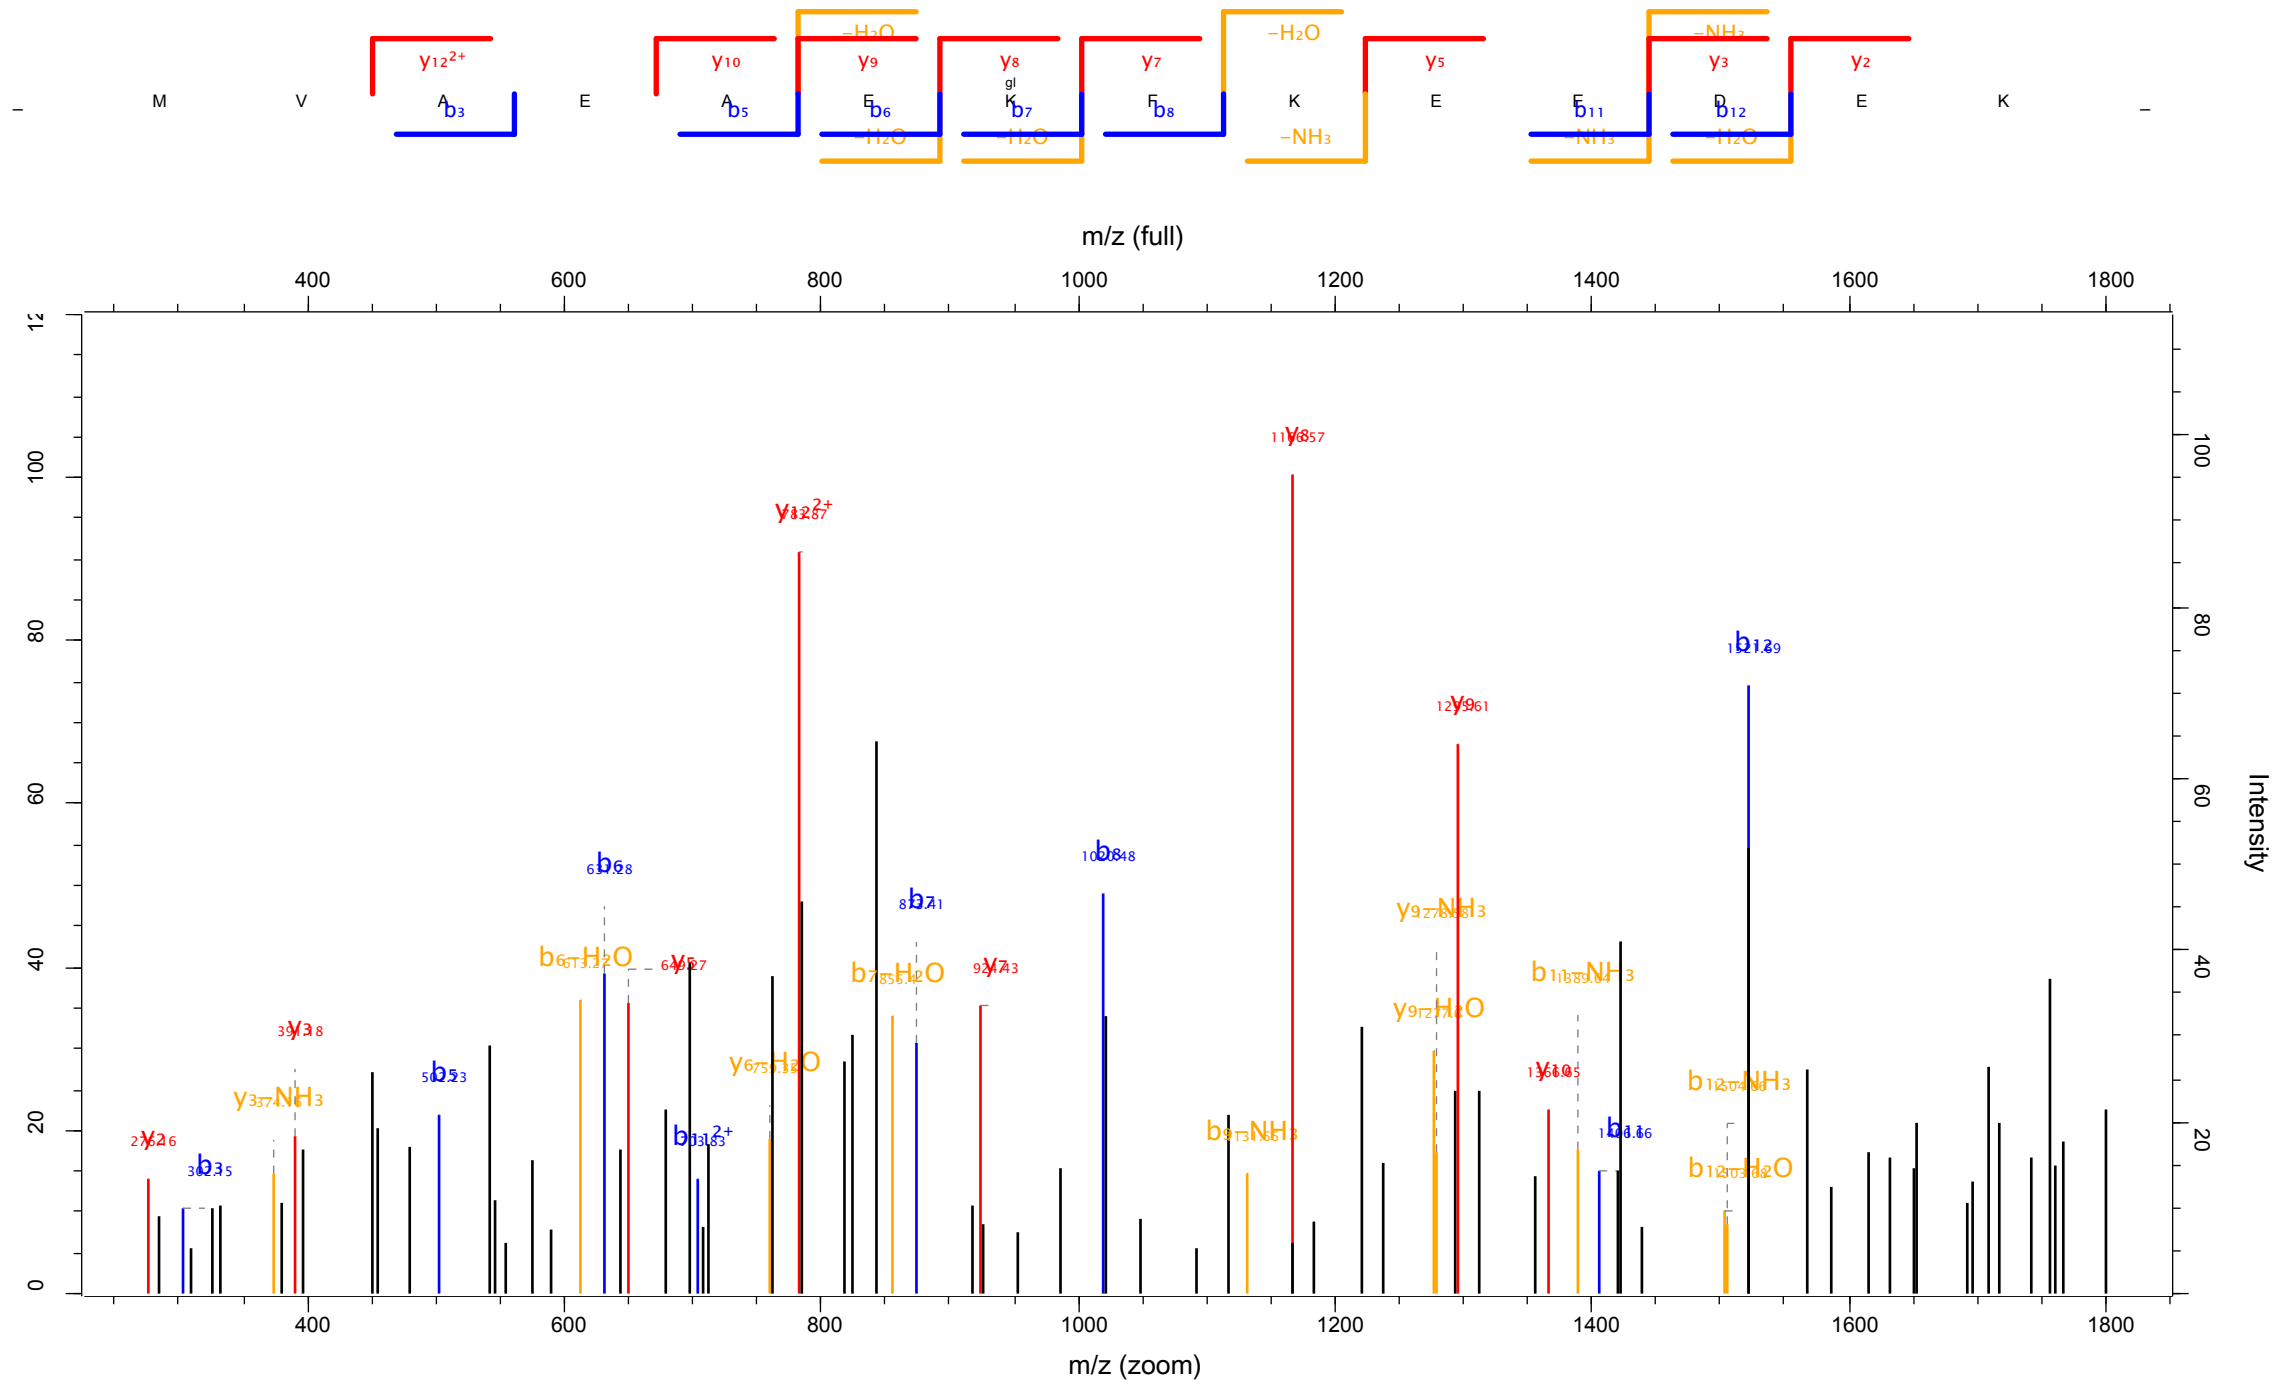

Scan number 8211 Raw file nak\_cdc48UbconjugatesSAX5\_14may10\_09  
 Method ITMS; CID Pepti... 114.72

GlyGly Site Id 1

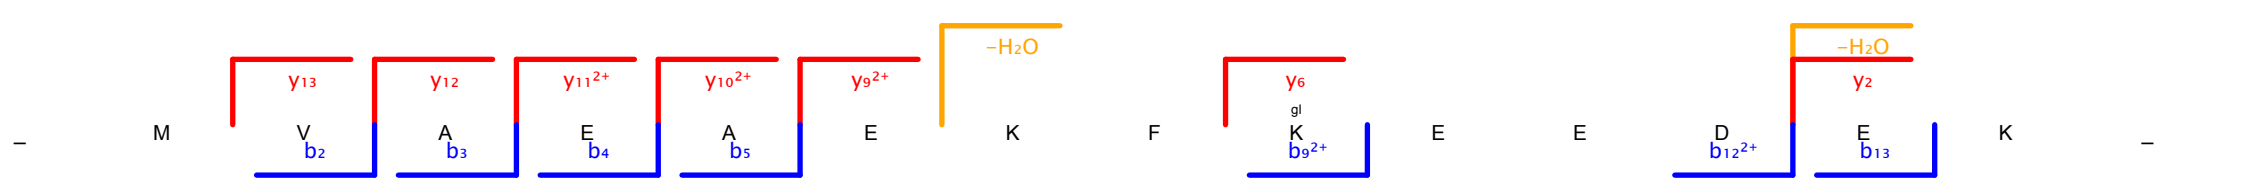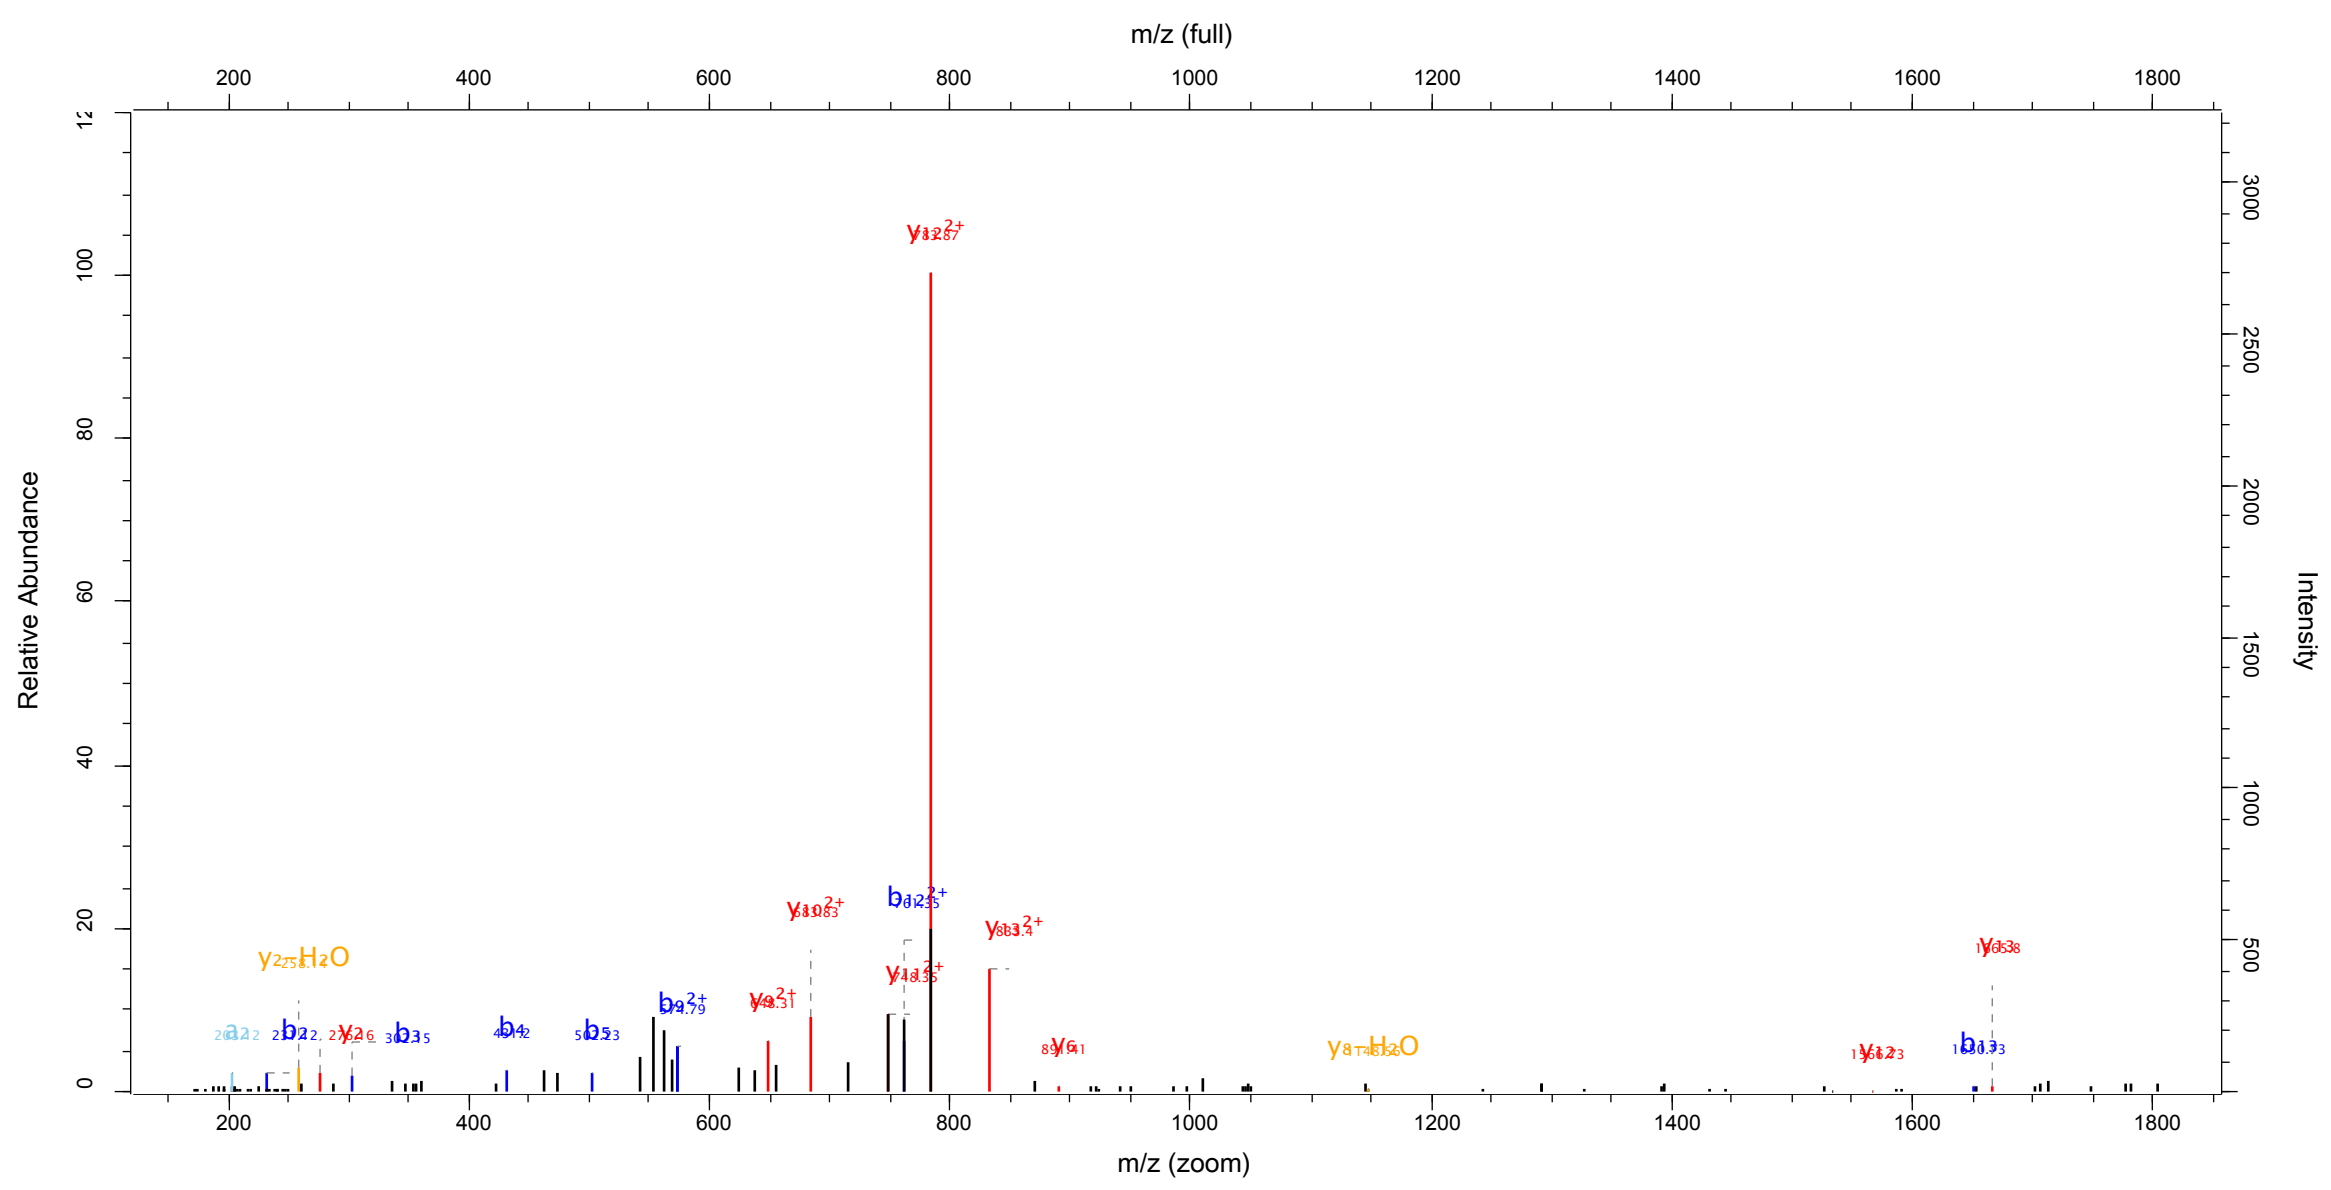

Scan number 2577 Raw file nak\_cdc48UbconjugatesSAX5\_14may10\_09  
 Method ITMS; CID Pepti... 123.28

GlyGly Site Id 2

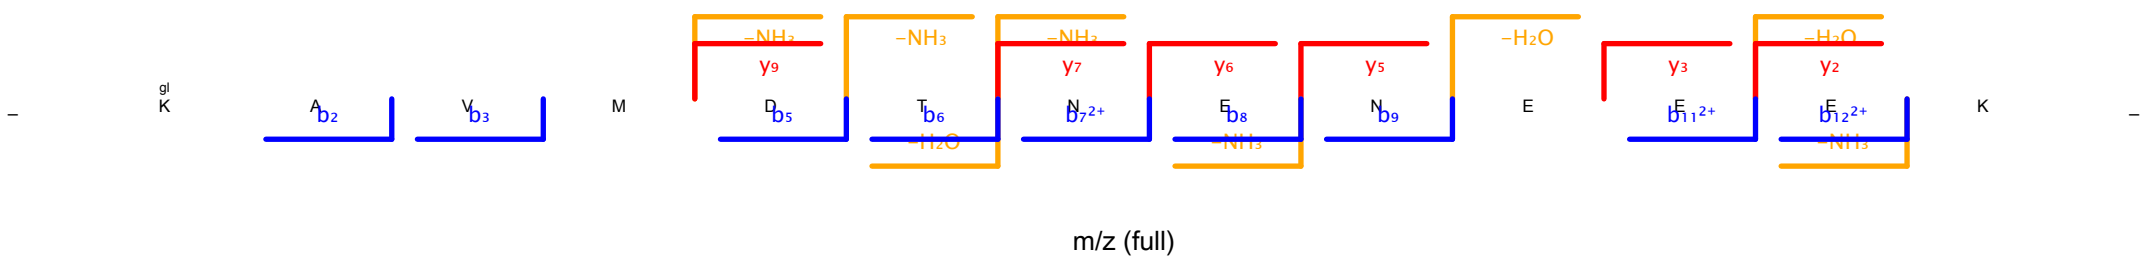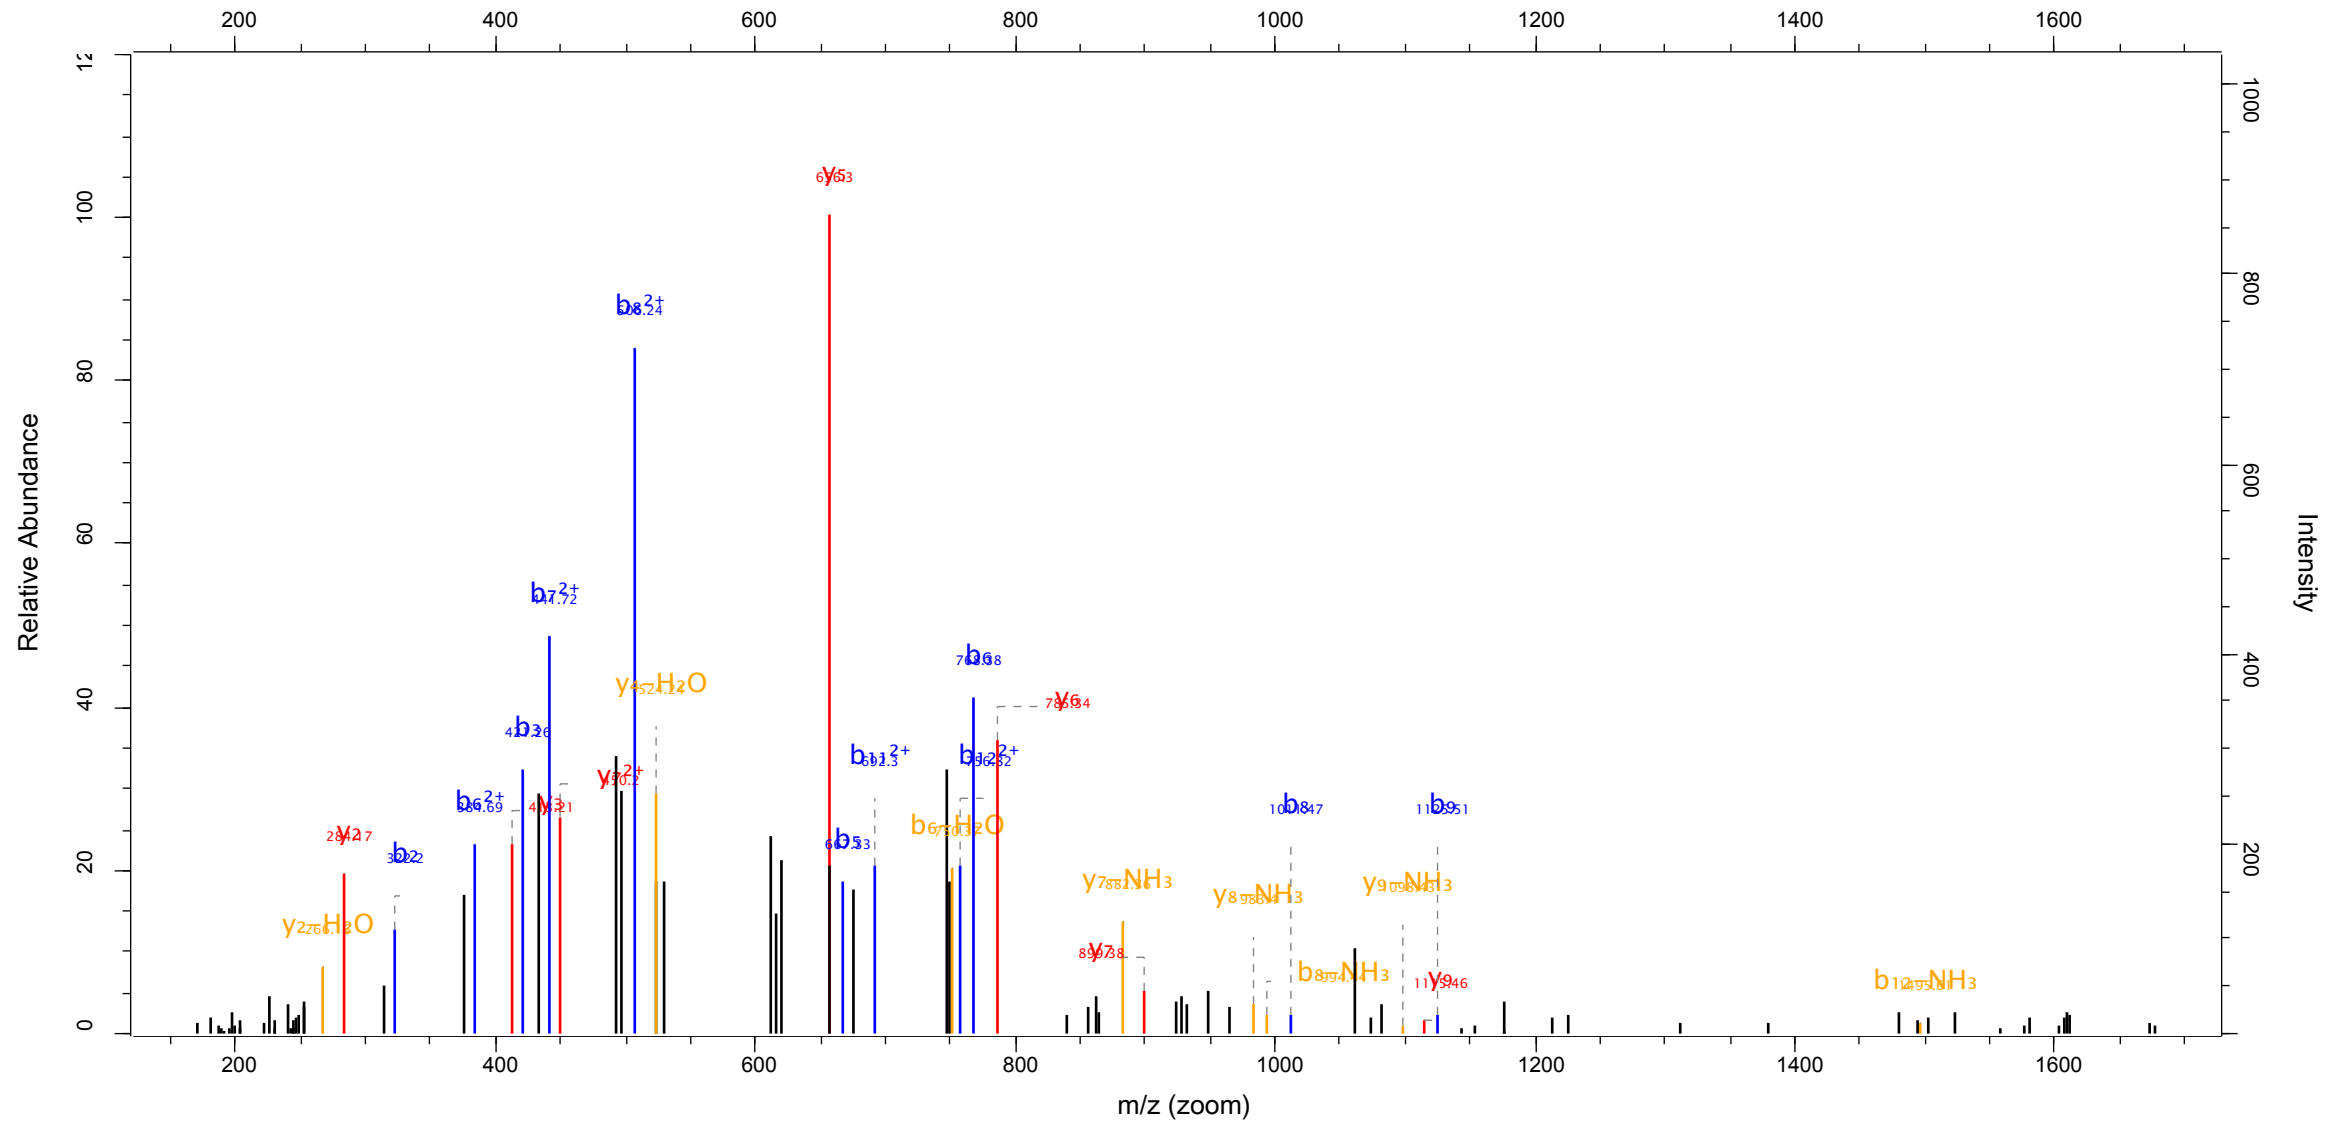

Scan number  
Method

17971  
ITMS; CID

Raw file  
Pepti...

nak\_UBX2HSAX5\_8feb11\_09  
95.98

GlyGly Site Id 3

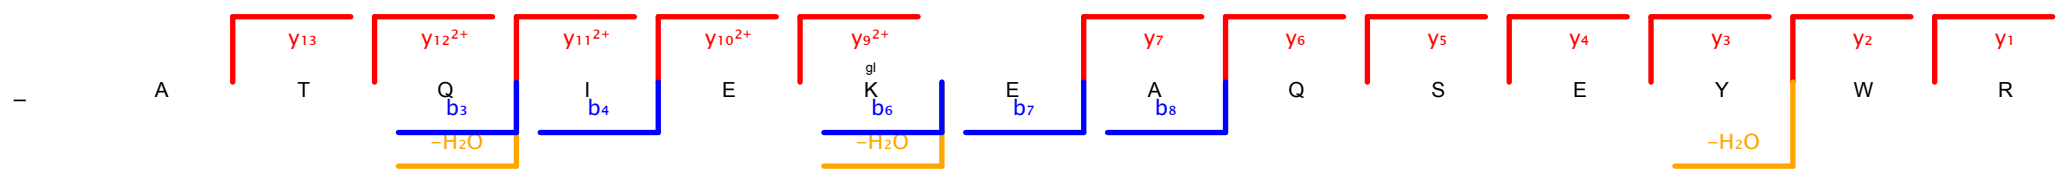

m/z (full)

200 400 600 800 1000 1200 1400 1600 1800

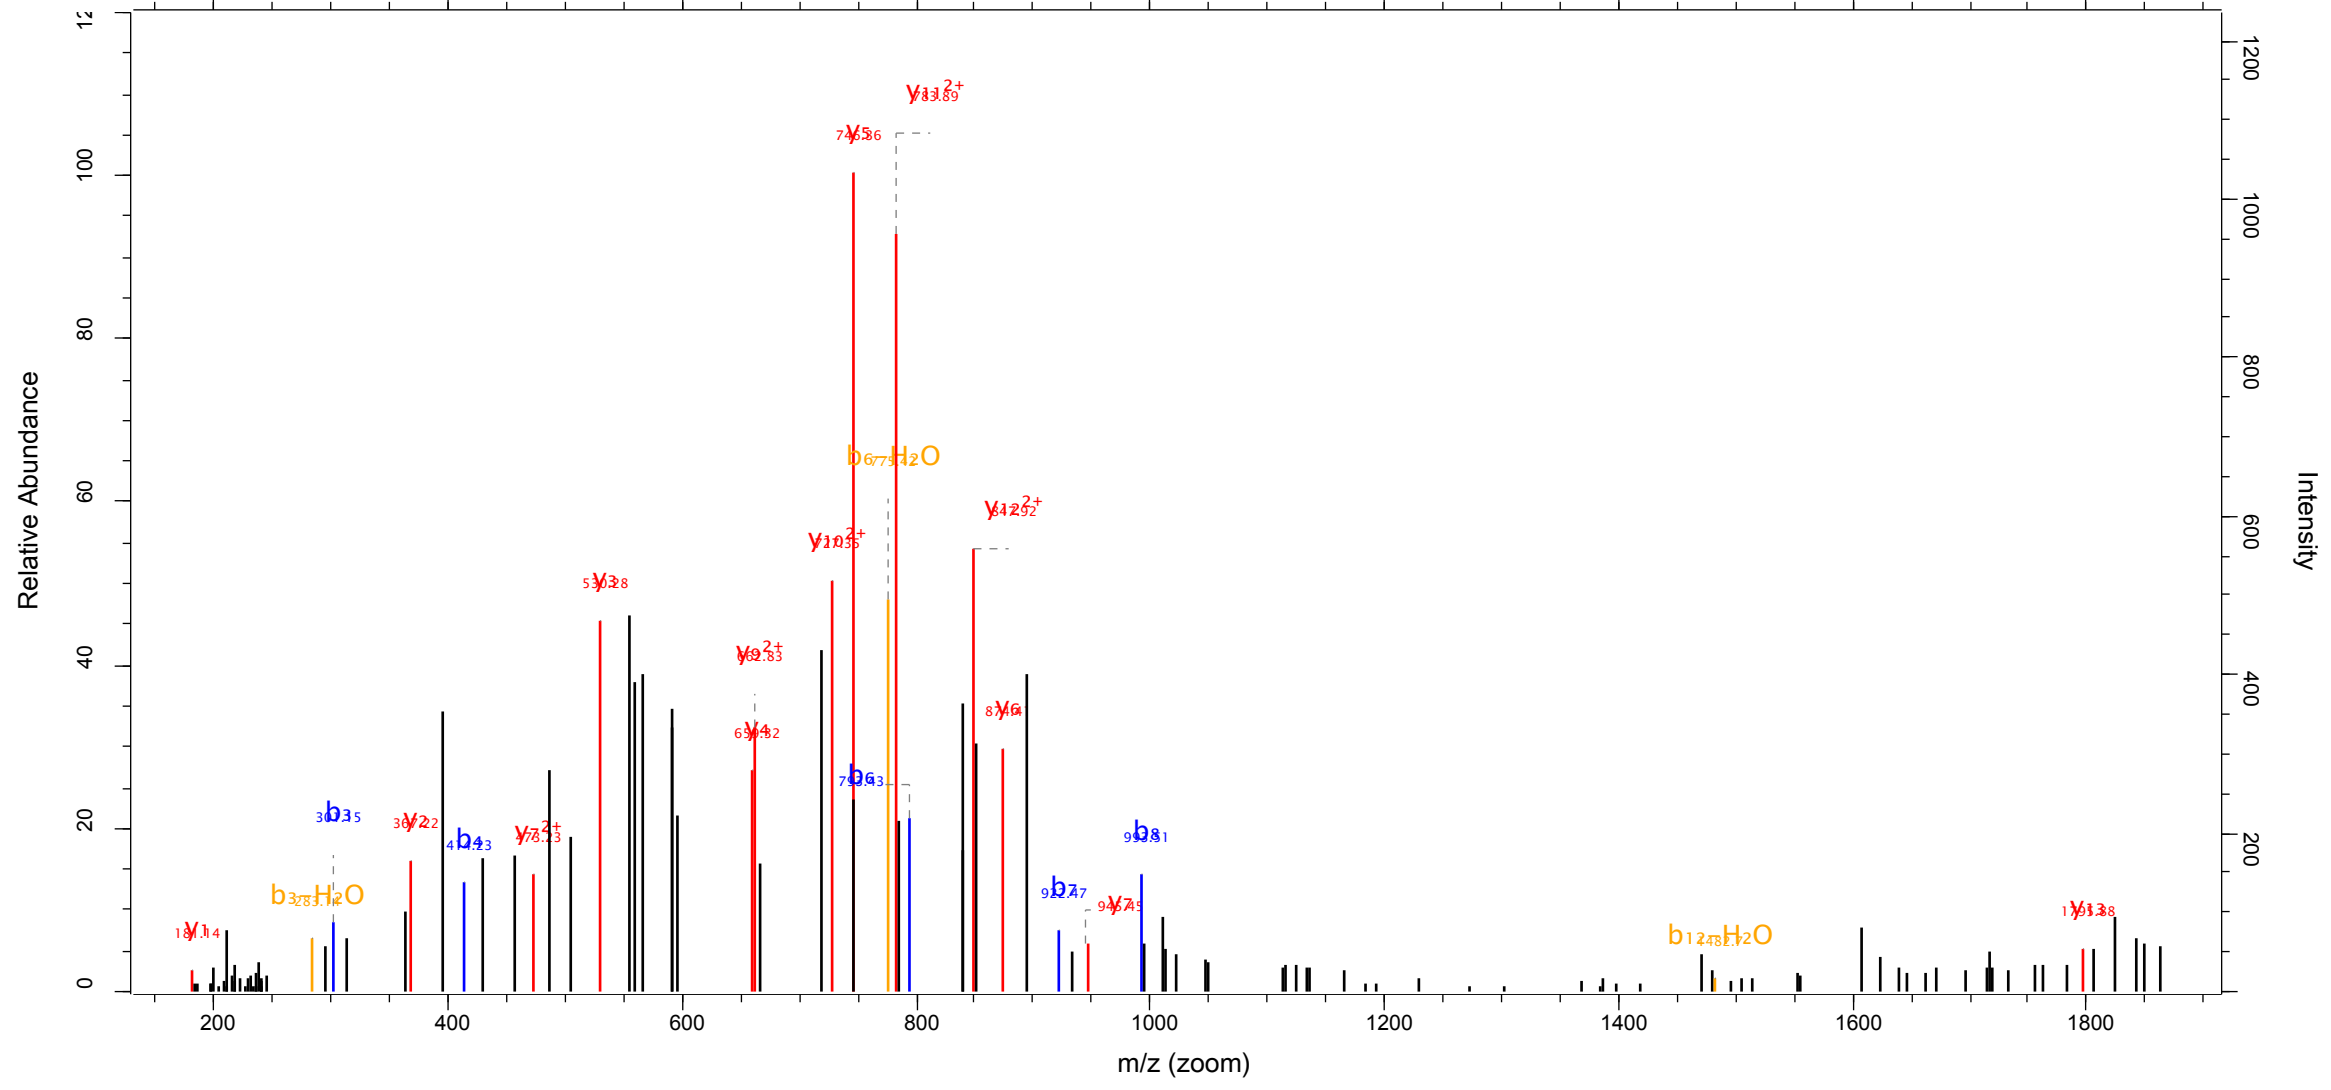

Scan number 8734 Raw file nak\_UBX6SAX3H\_14jan11\_13  
 Method ITMS; CID Pepti... 141.2

GlyGly Site Id 4

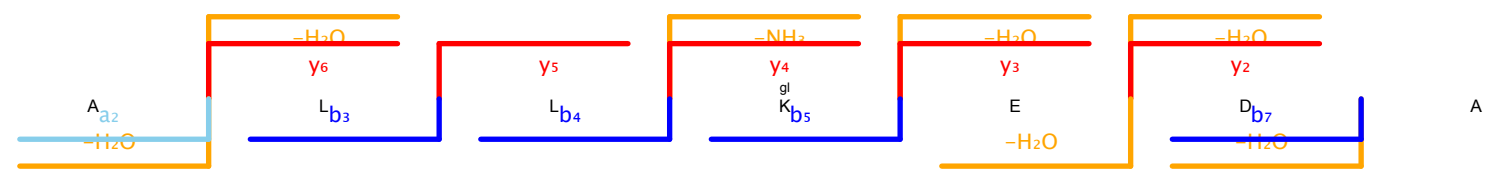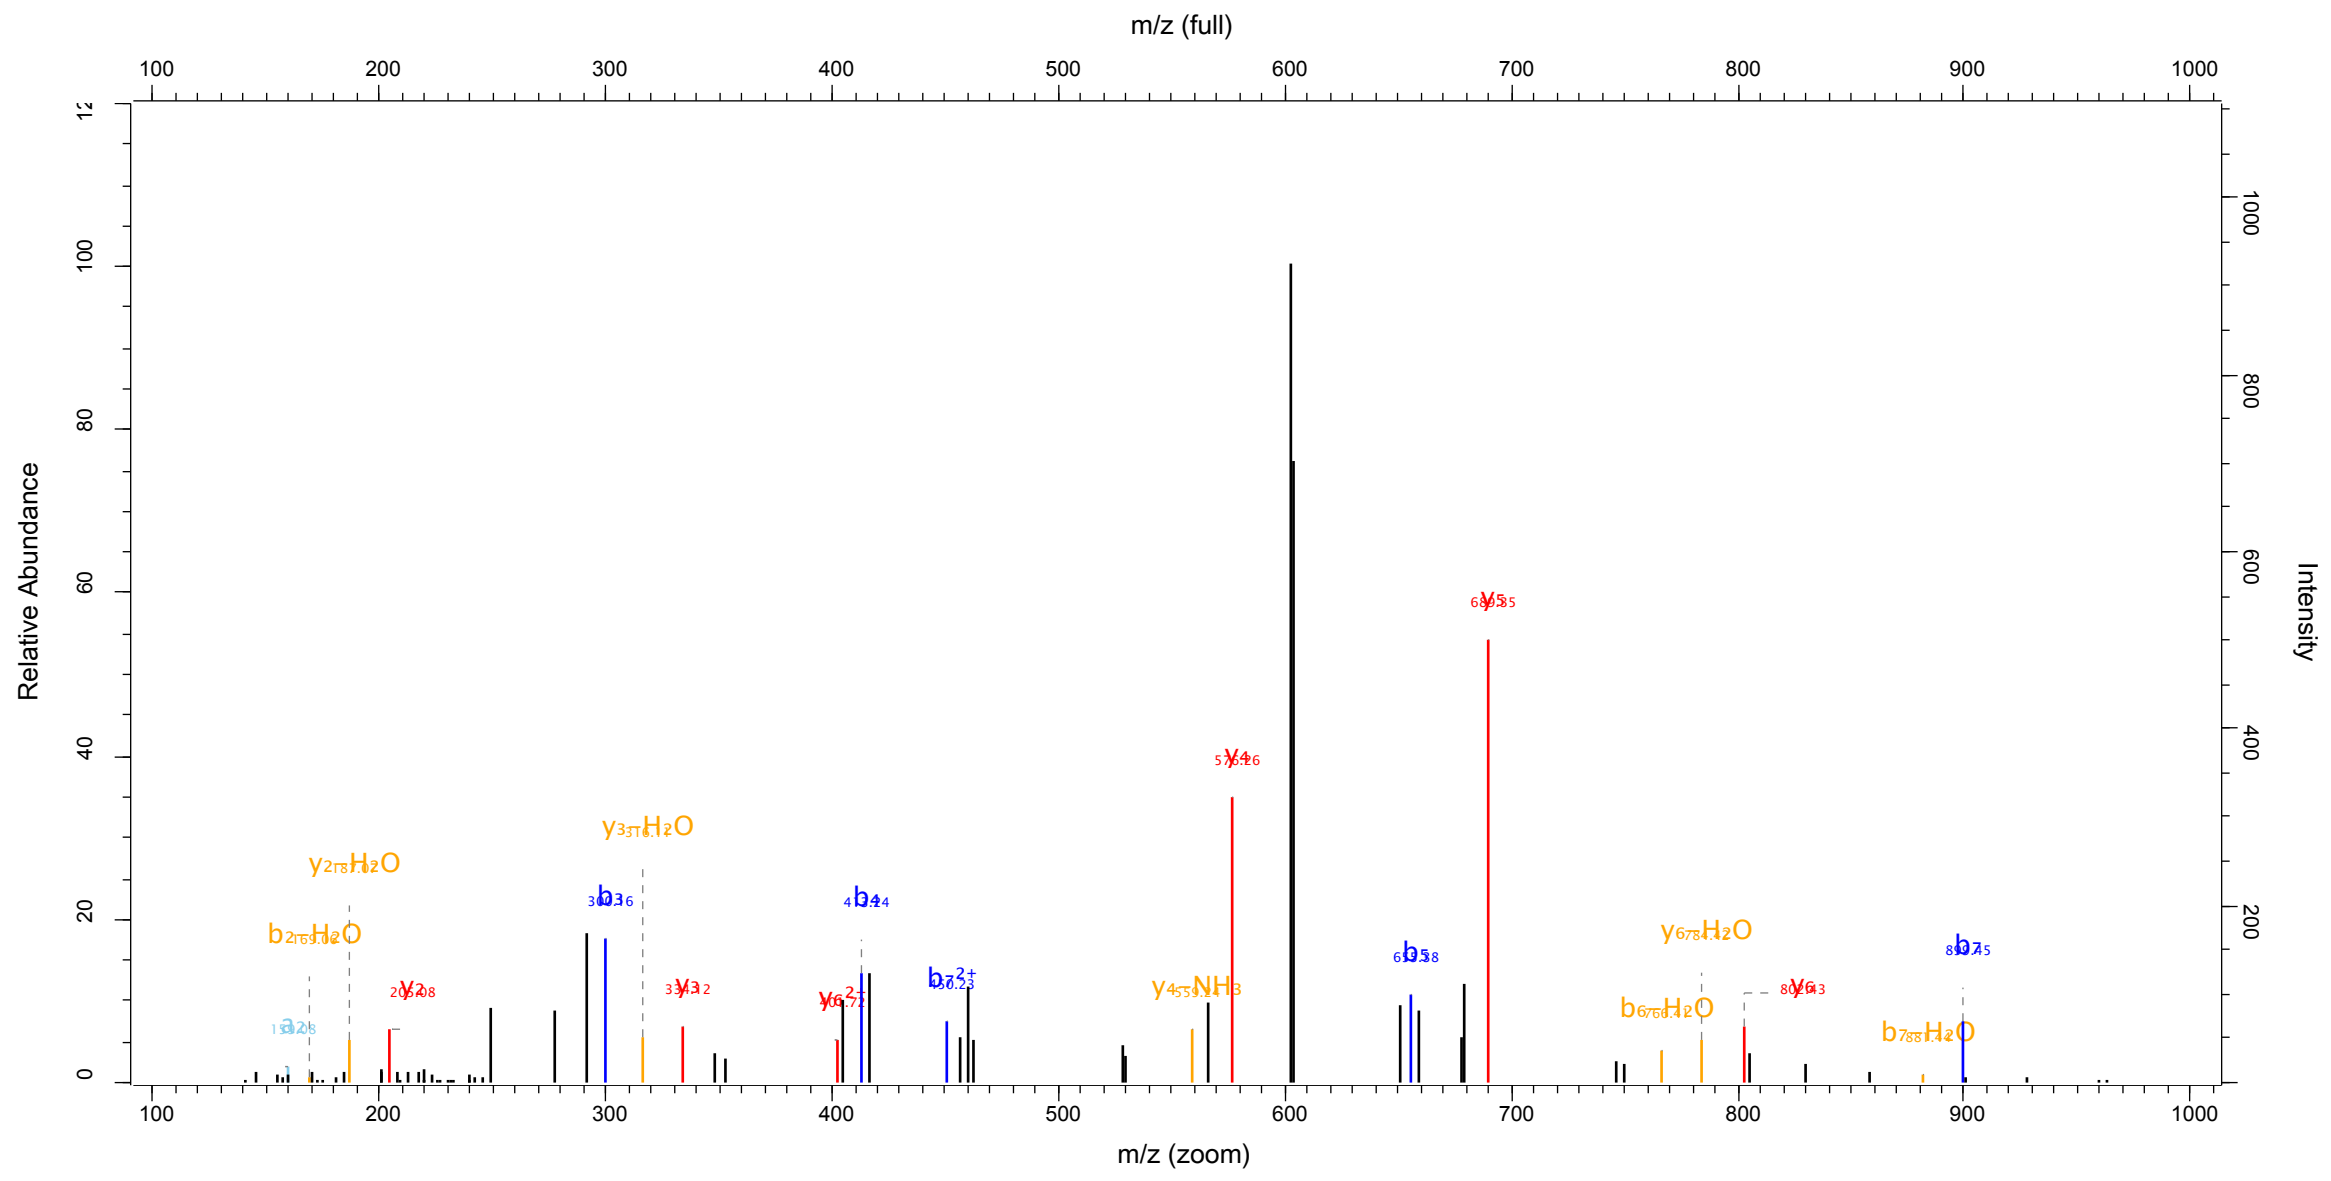

Scan number 16277 Raw file nak\_UBX3HSAX5\_28jan11\_31  
 Method ITMS; CID Pepti... 173.06

GlyGly Site Id 5

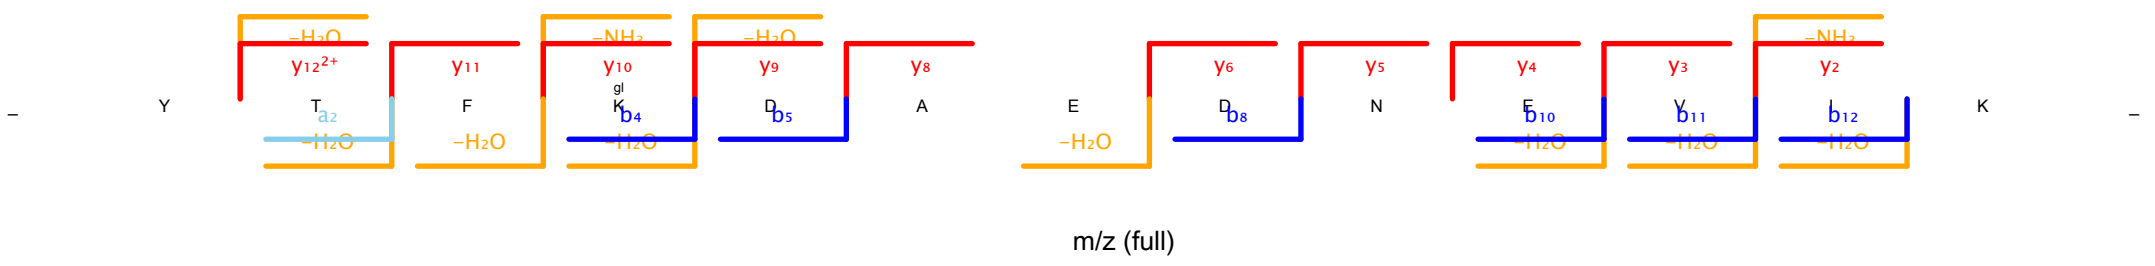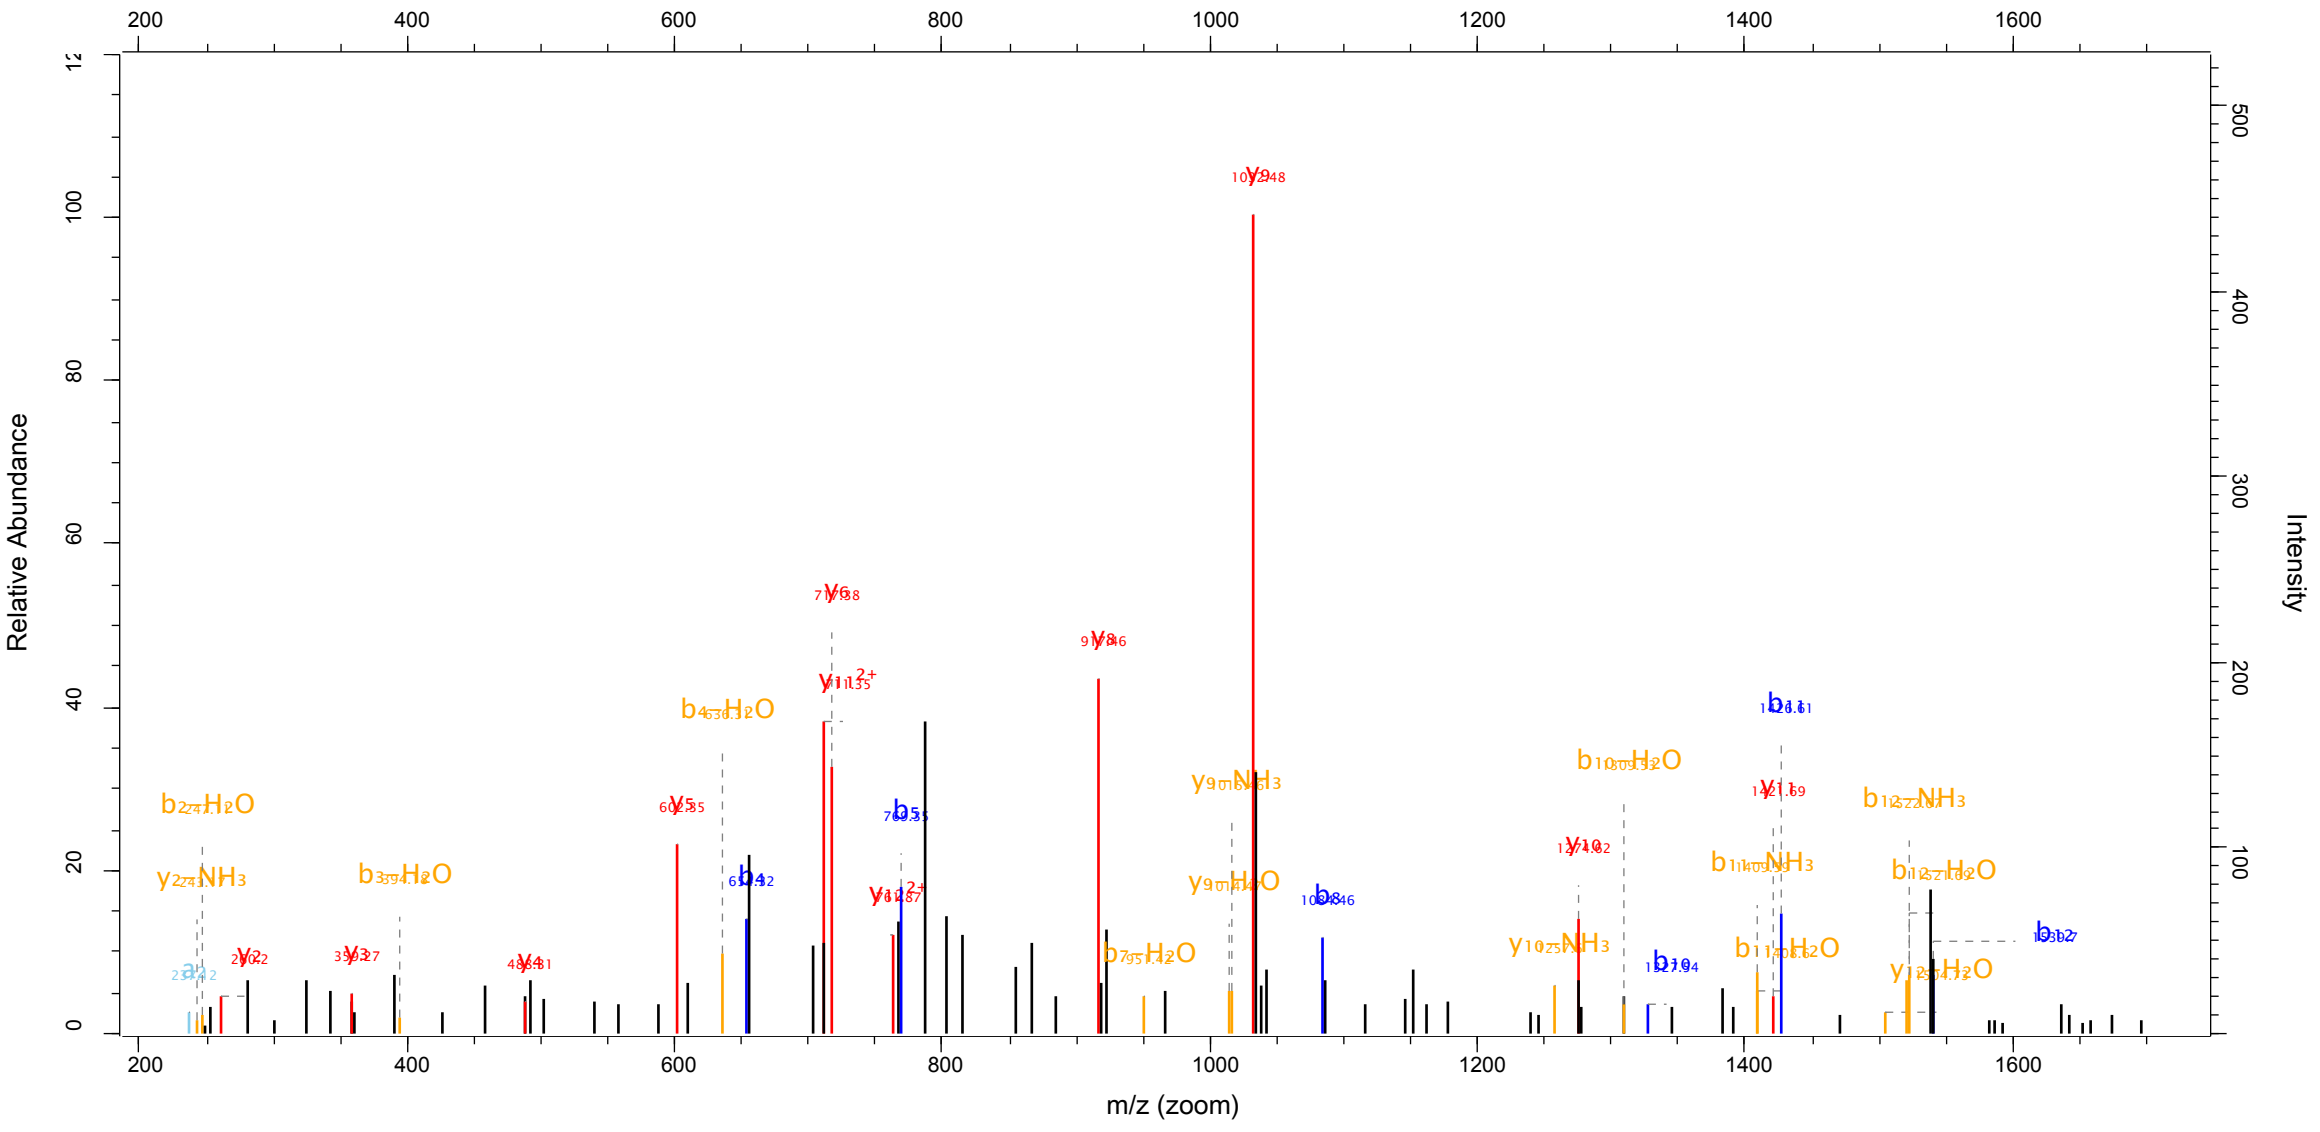

Scan number 18419 Raw file nak\_UBX2LSAX6\_8feb11\_06  
 Method ITMS; CID Pepti... 100.77

GlyGly Site Id 6

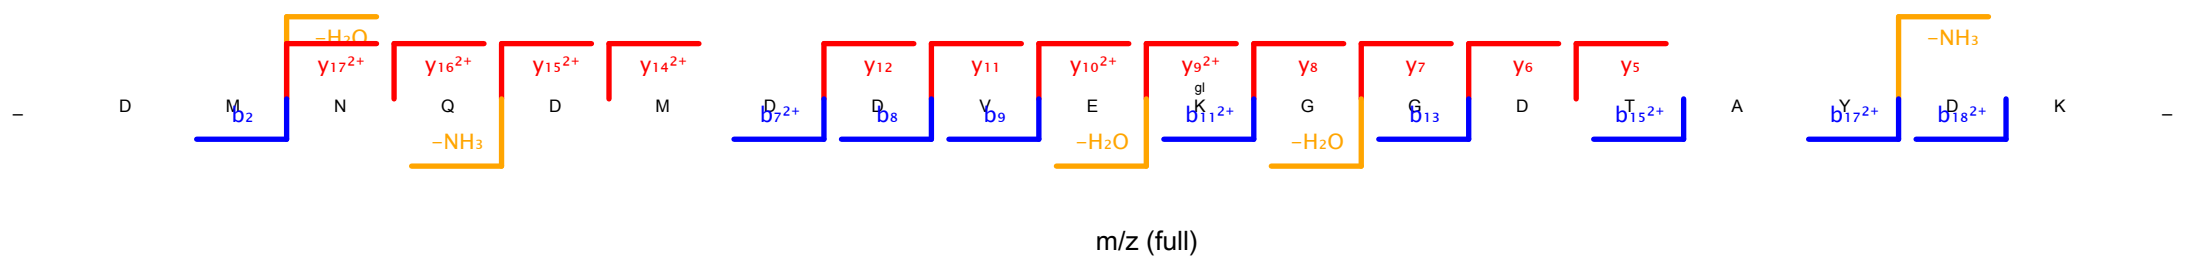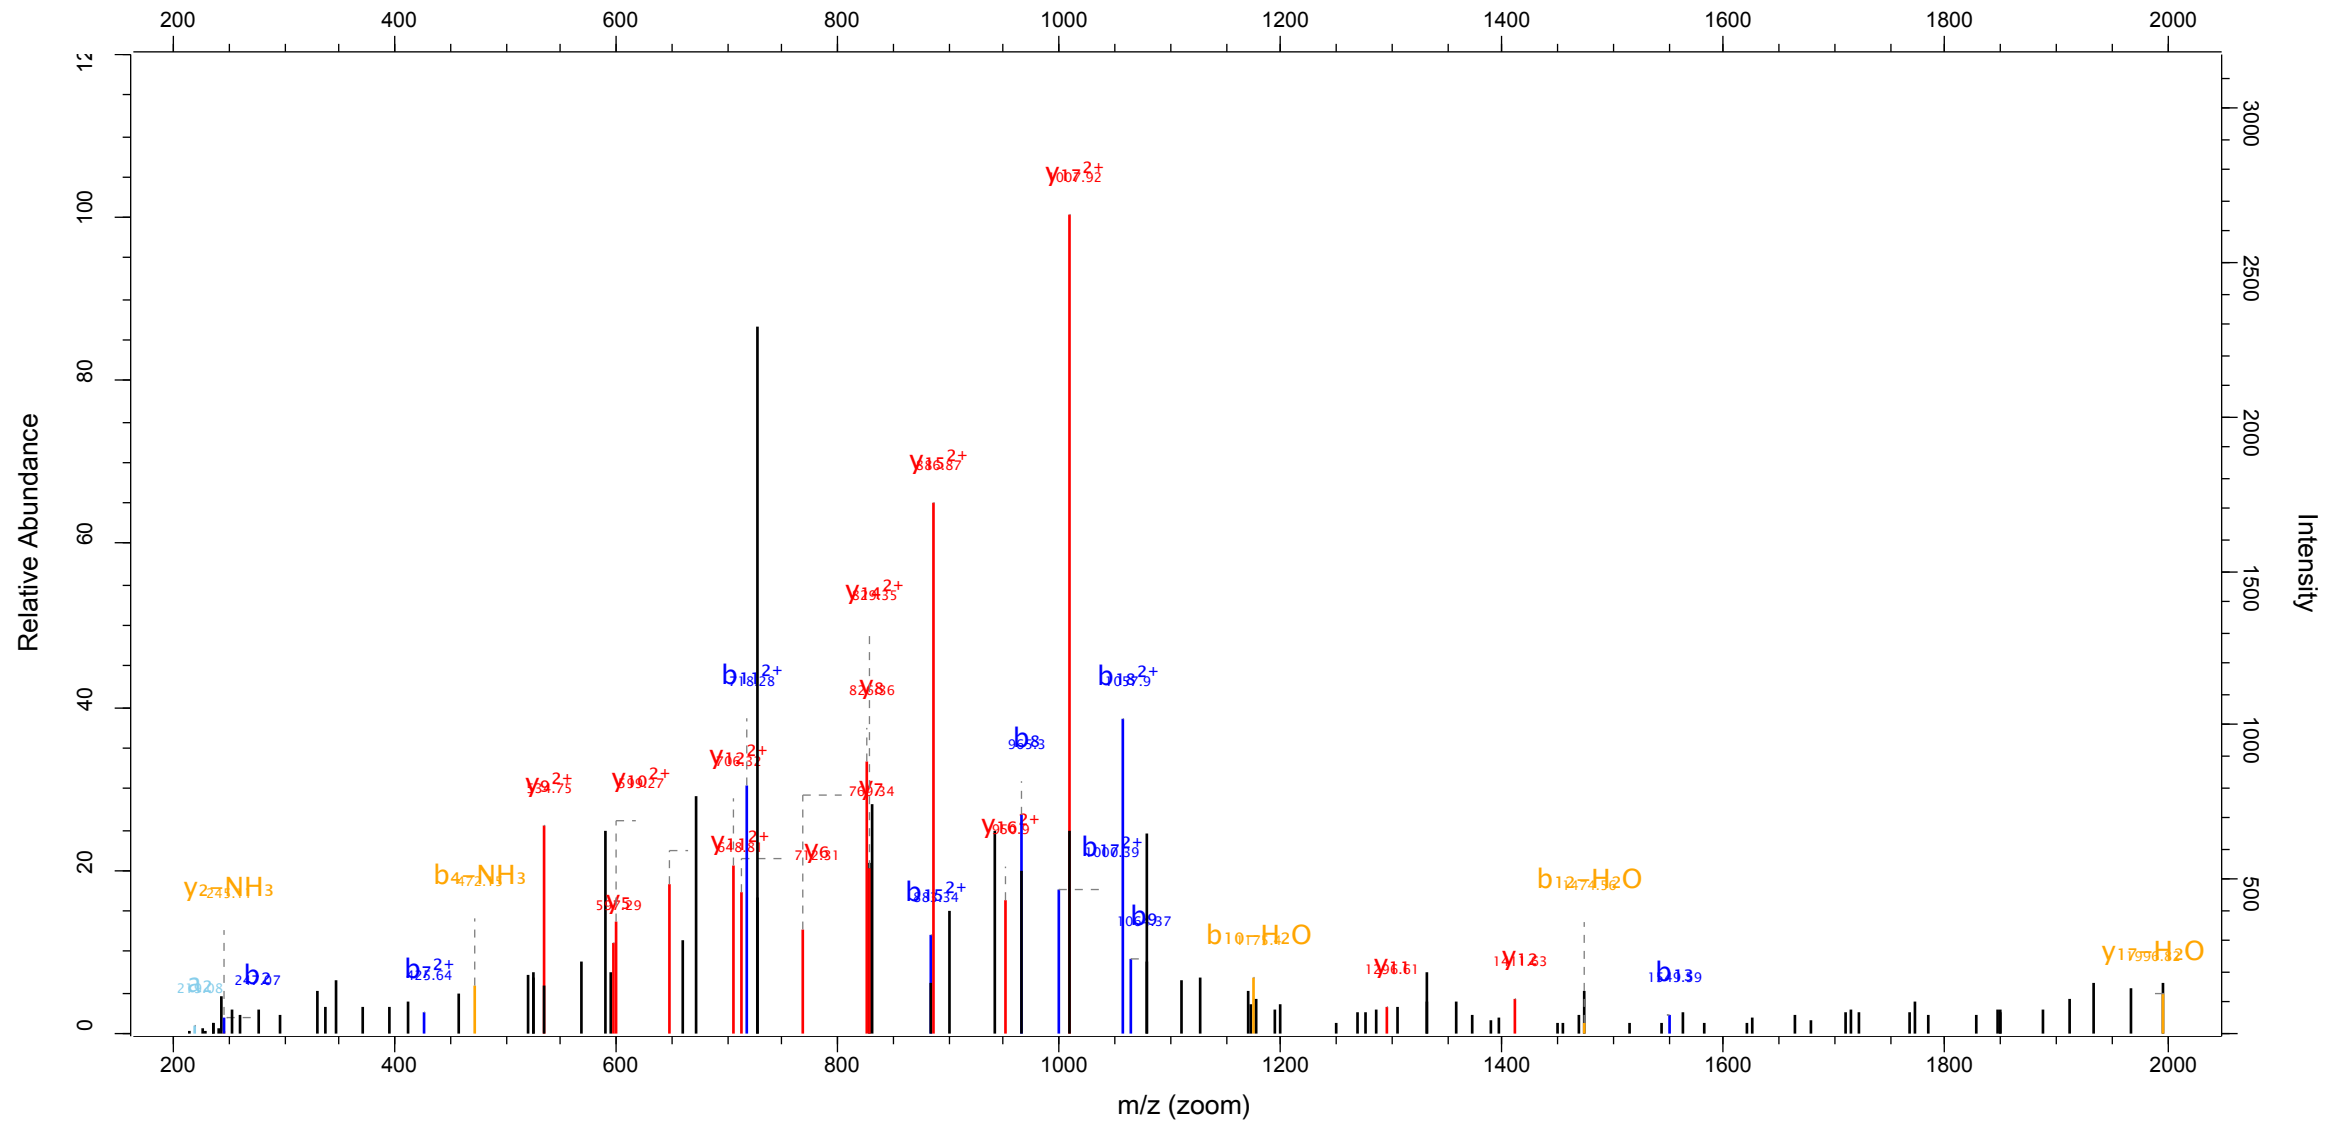

Scan number  
Method

27658  
ITMS; CID

Raw file  
Pepti...

nak\_UBX2LSAX3\_8feb11\_03  
152.07

GlyGly Site Id 7

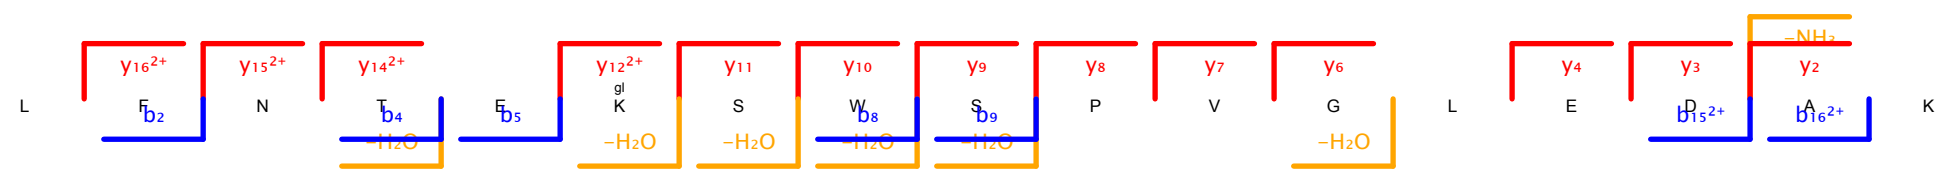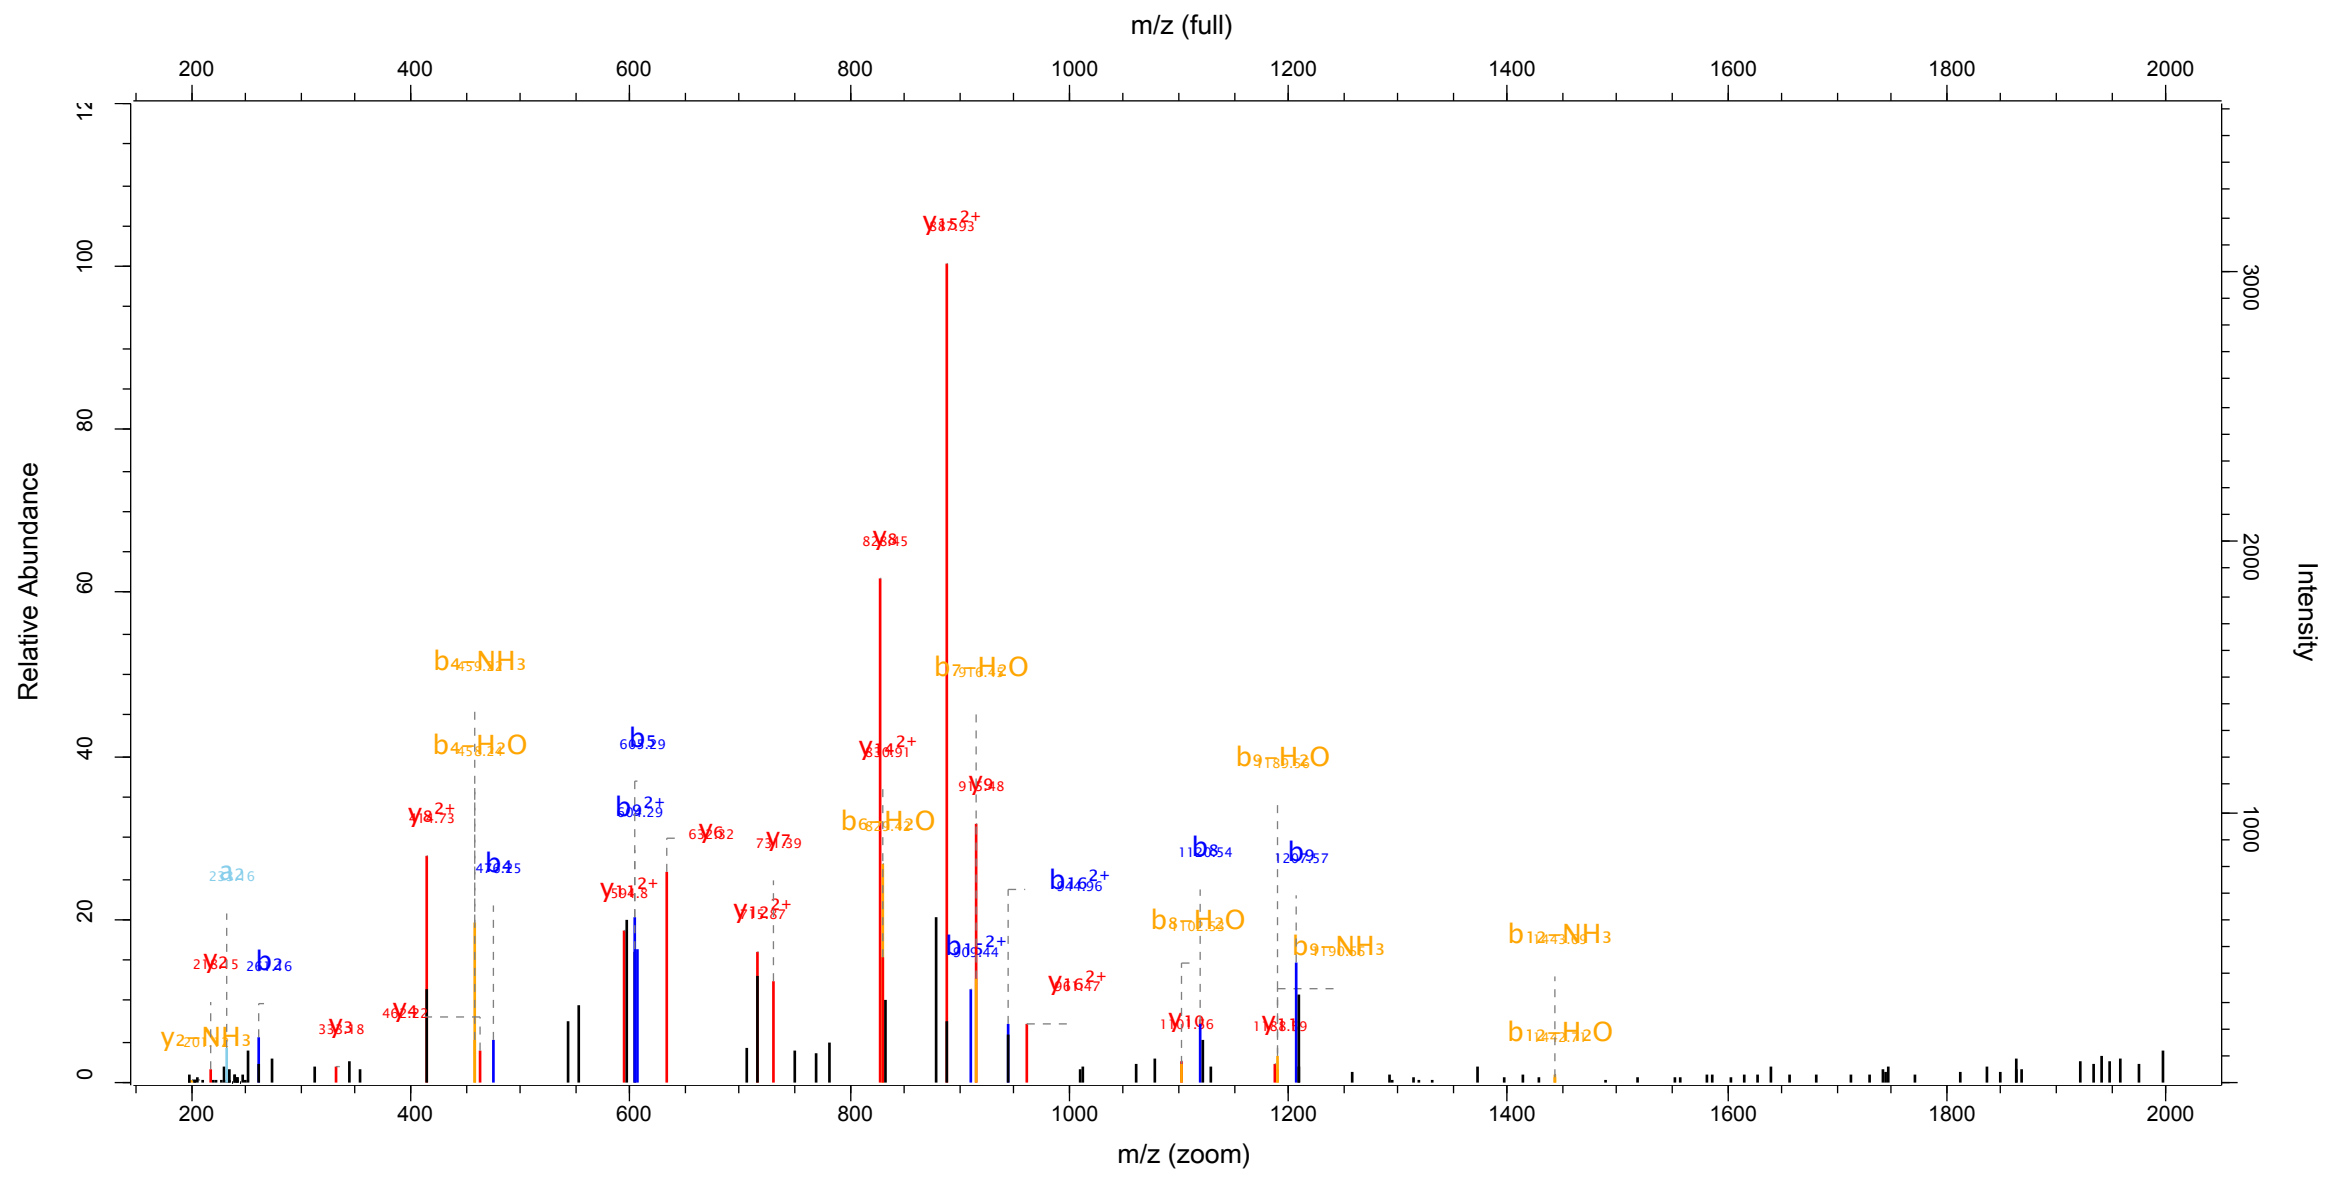



Scan number 27738 Raw file nak\_ubx4LightSAX5\_11 nov05  
 Method ITMS; CID Pepti... 87.33

GlyGly Site Id 8

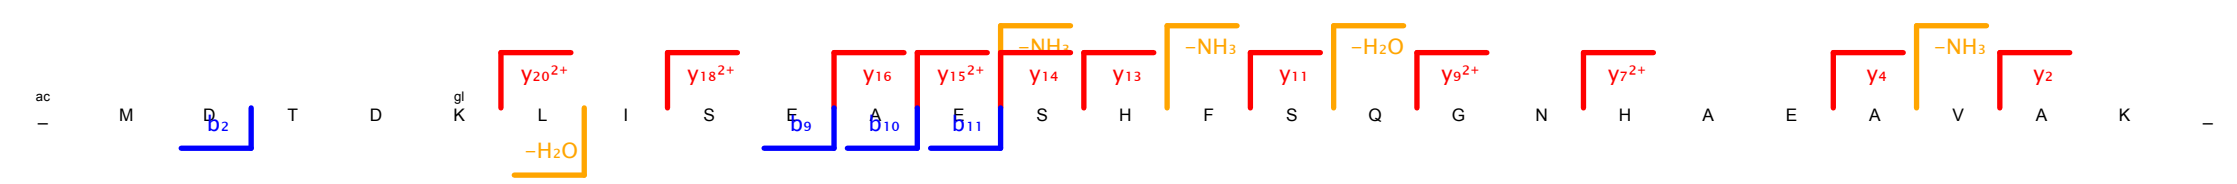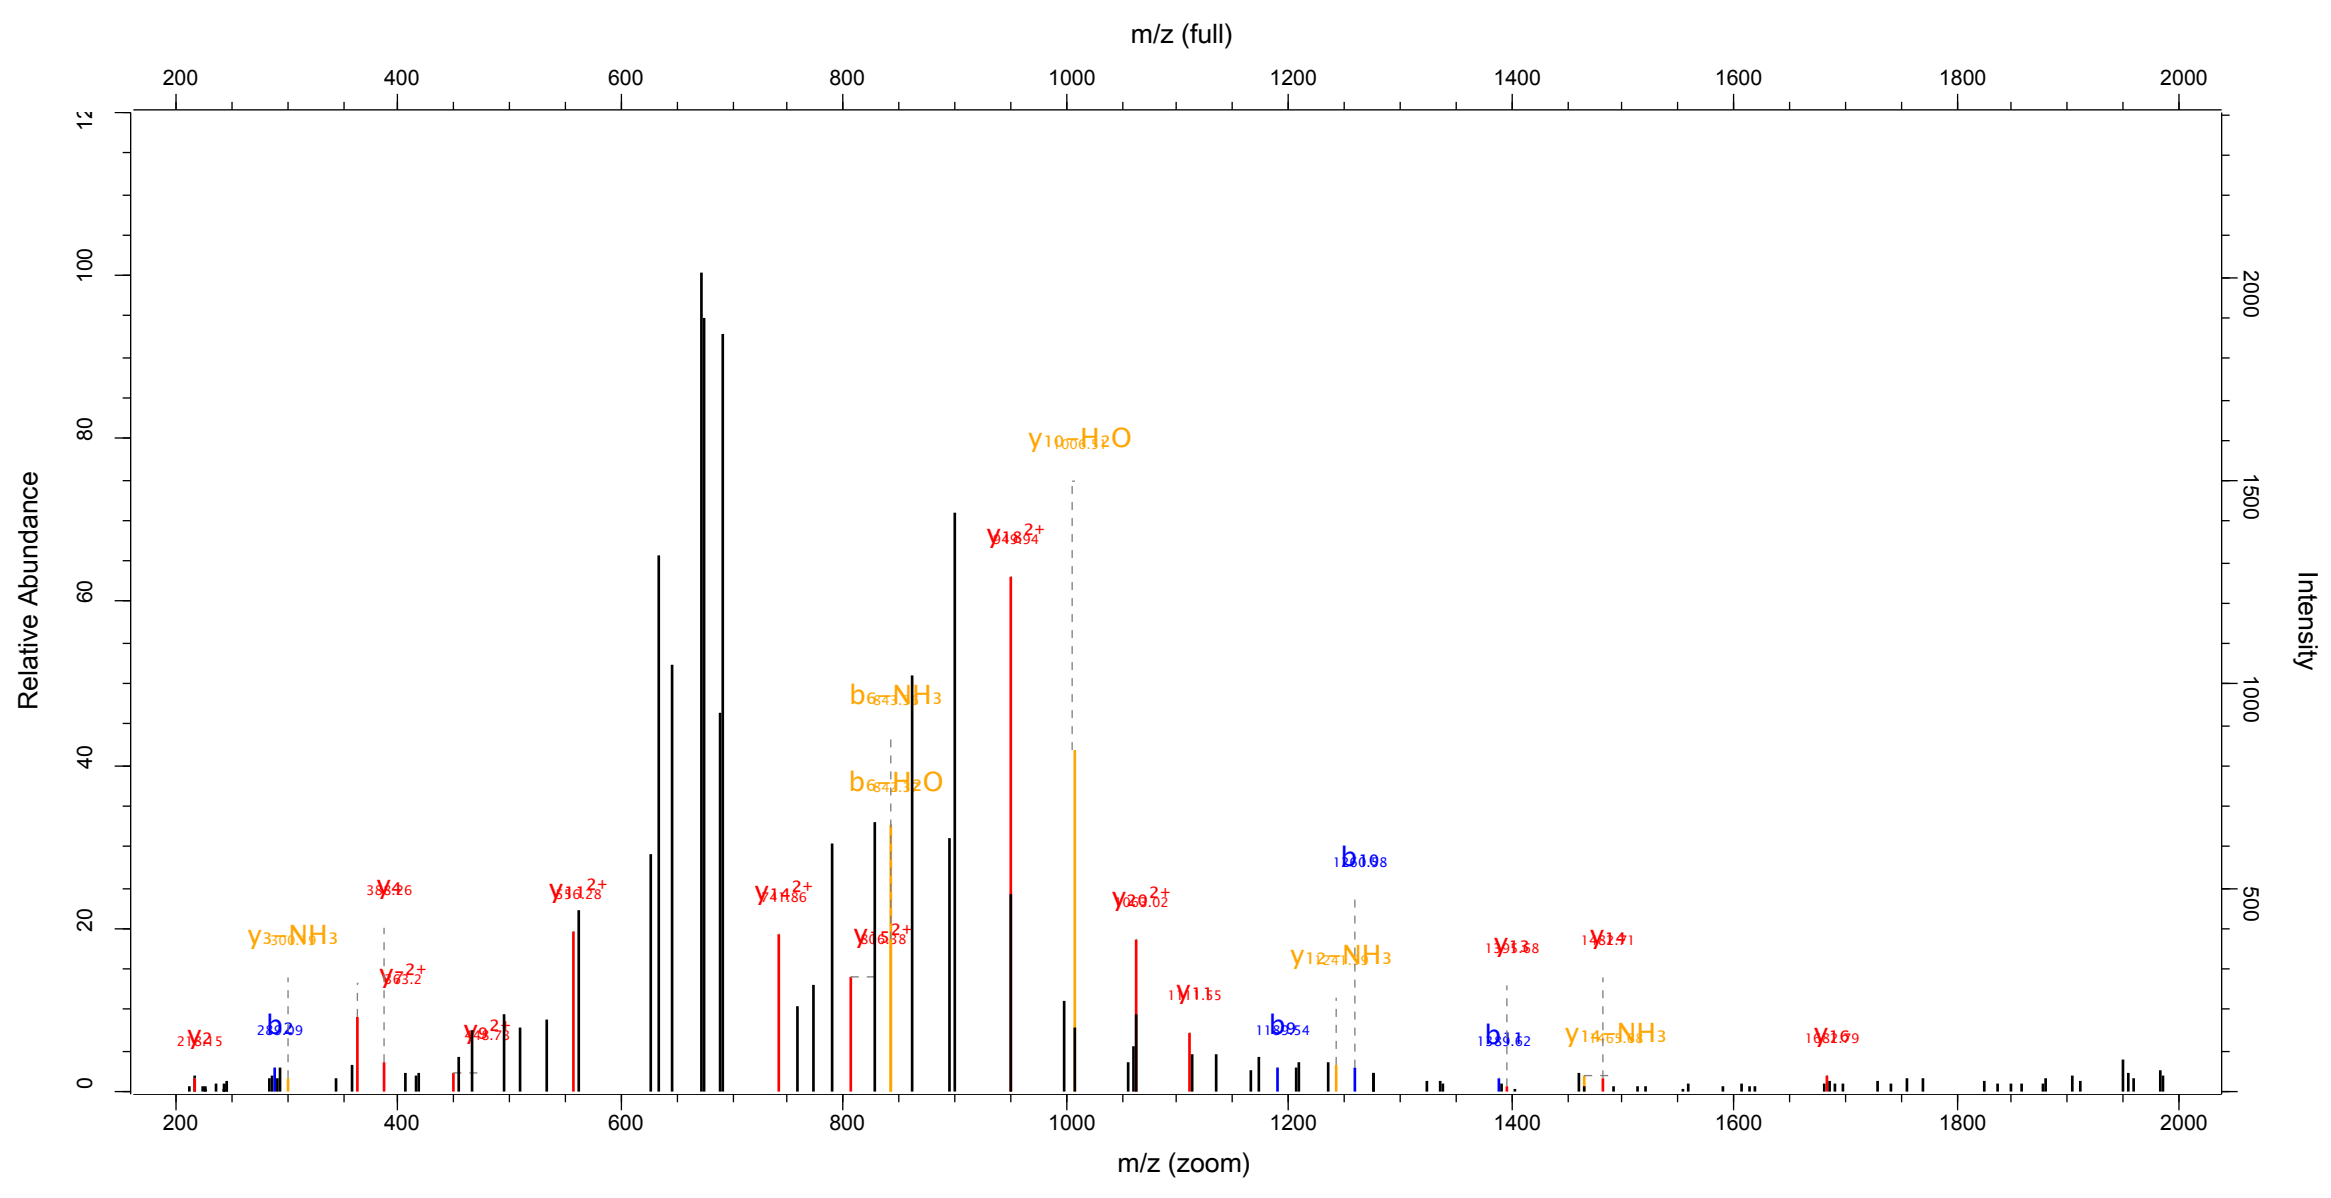

Scan number

10356

Raw file

nak\_UBX6SAX3H\_14jan11\_13

GlyGly Site Id 9

Method

ITMS; CID

Pepti...

107.35

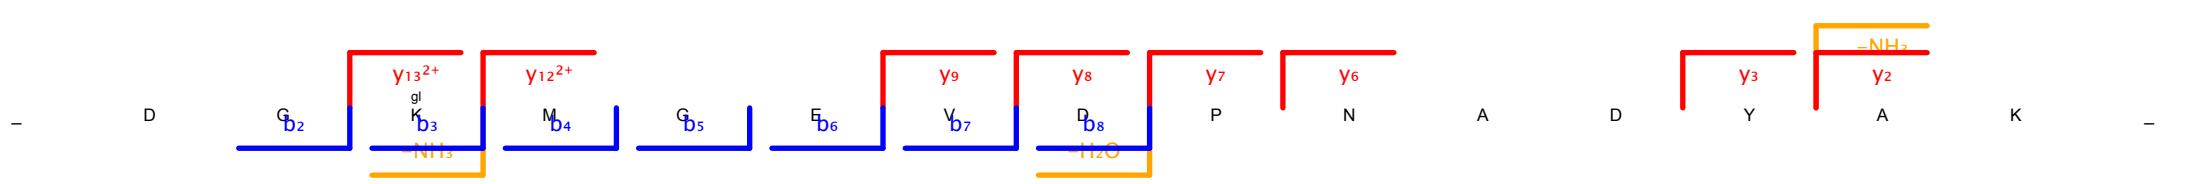

m/z (full)

200 400 600 800 1000 1200 1400 1600

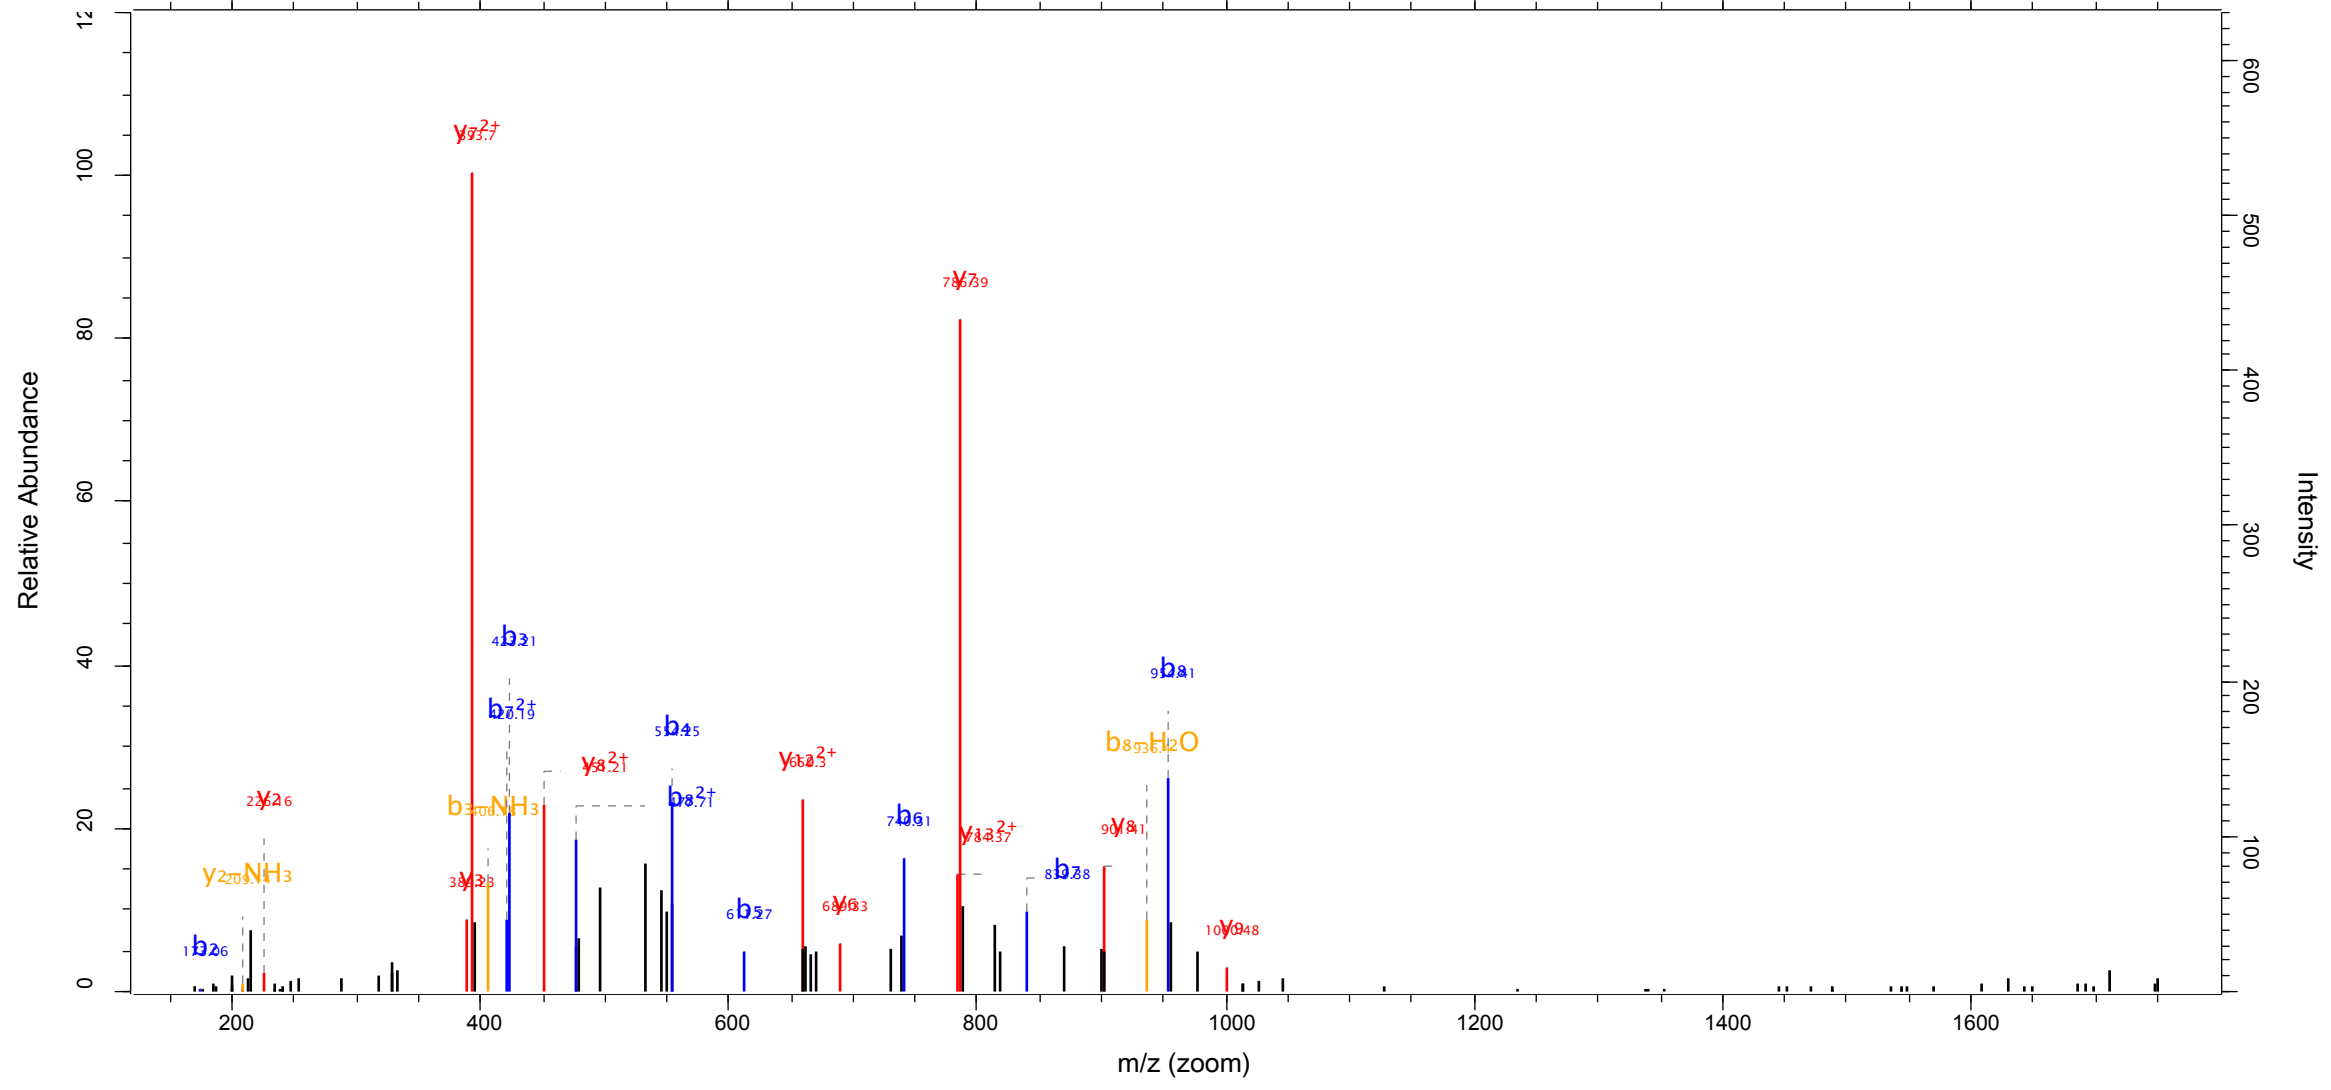

m/z (zoom)

Intensity

Scan number  
Method

31000  
ITMS; CID

Raw file  
Pepti...

nak\_ubx4HeavySAX6\_11nov11  
88.43

GlyGly Site Id 10

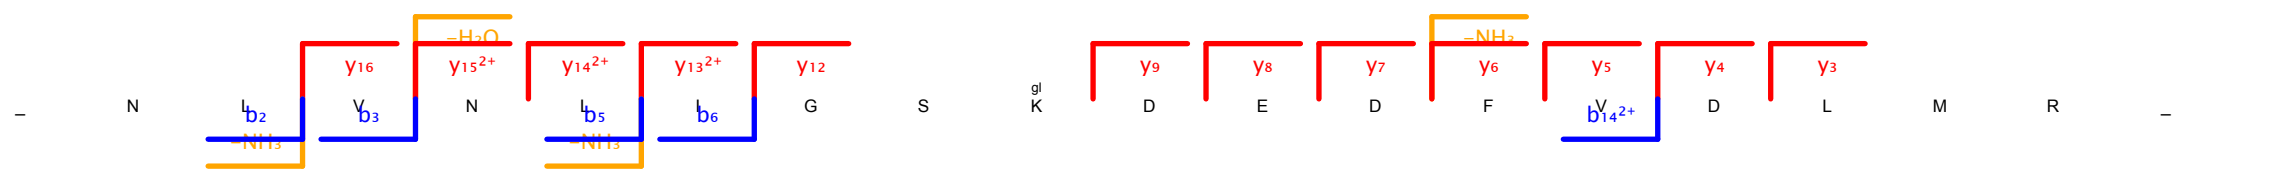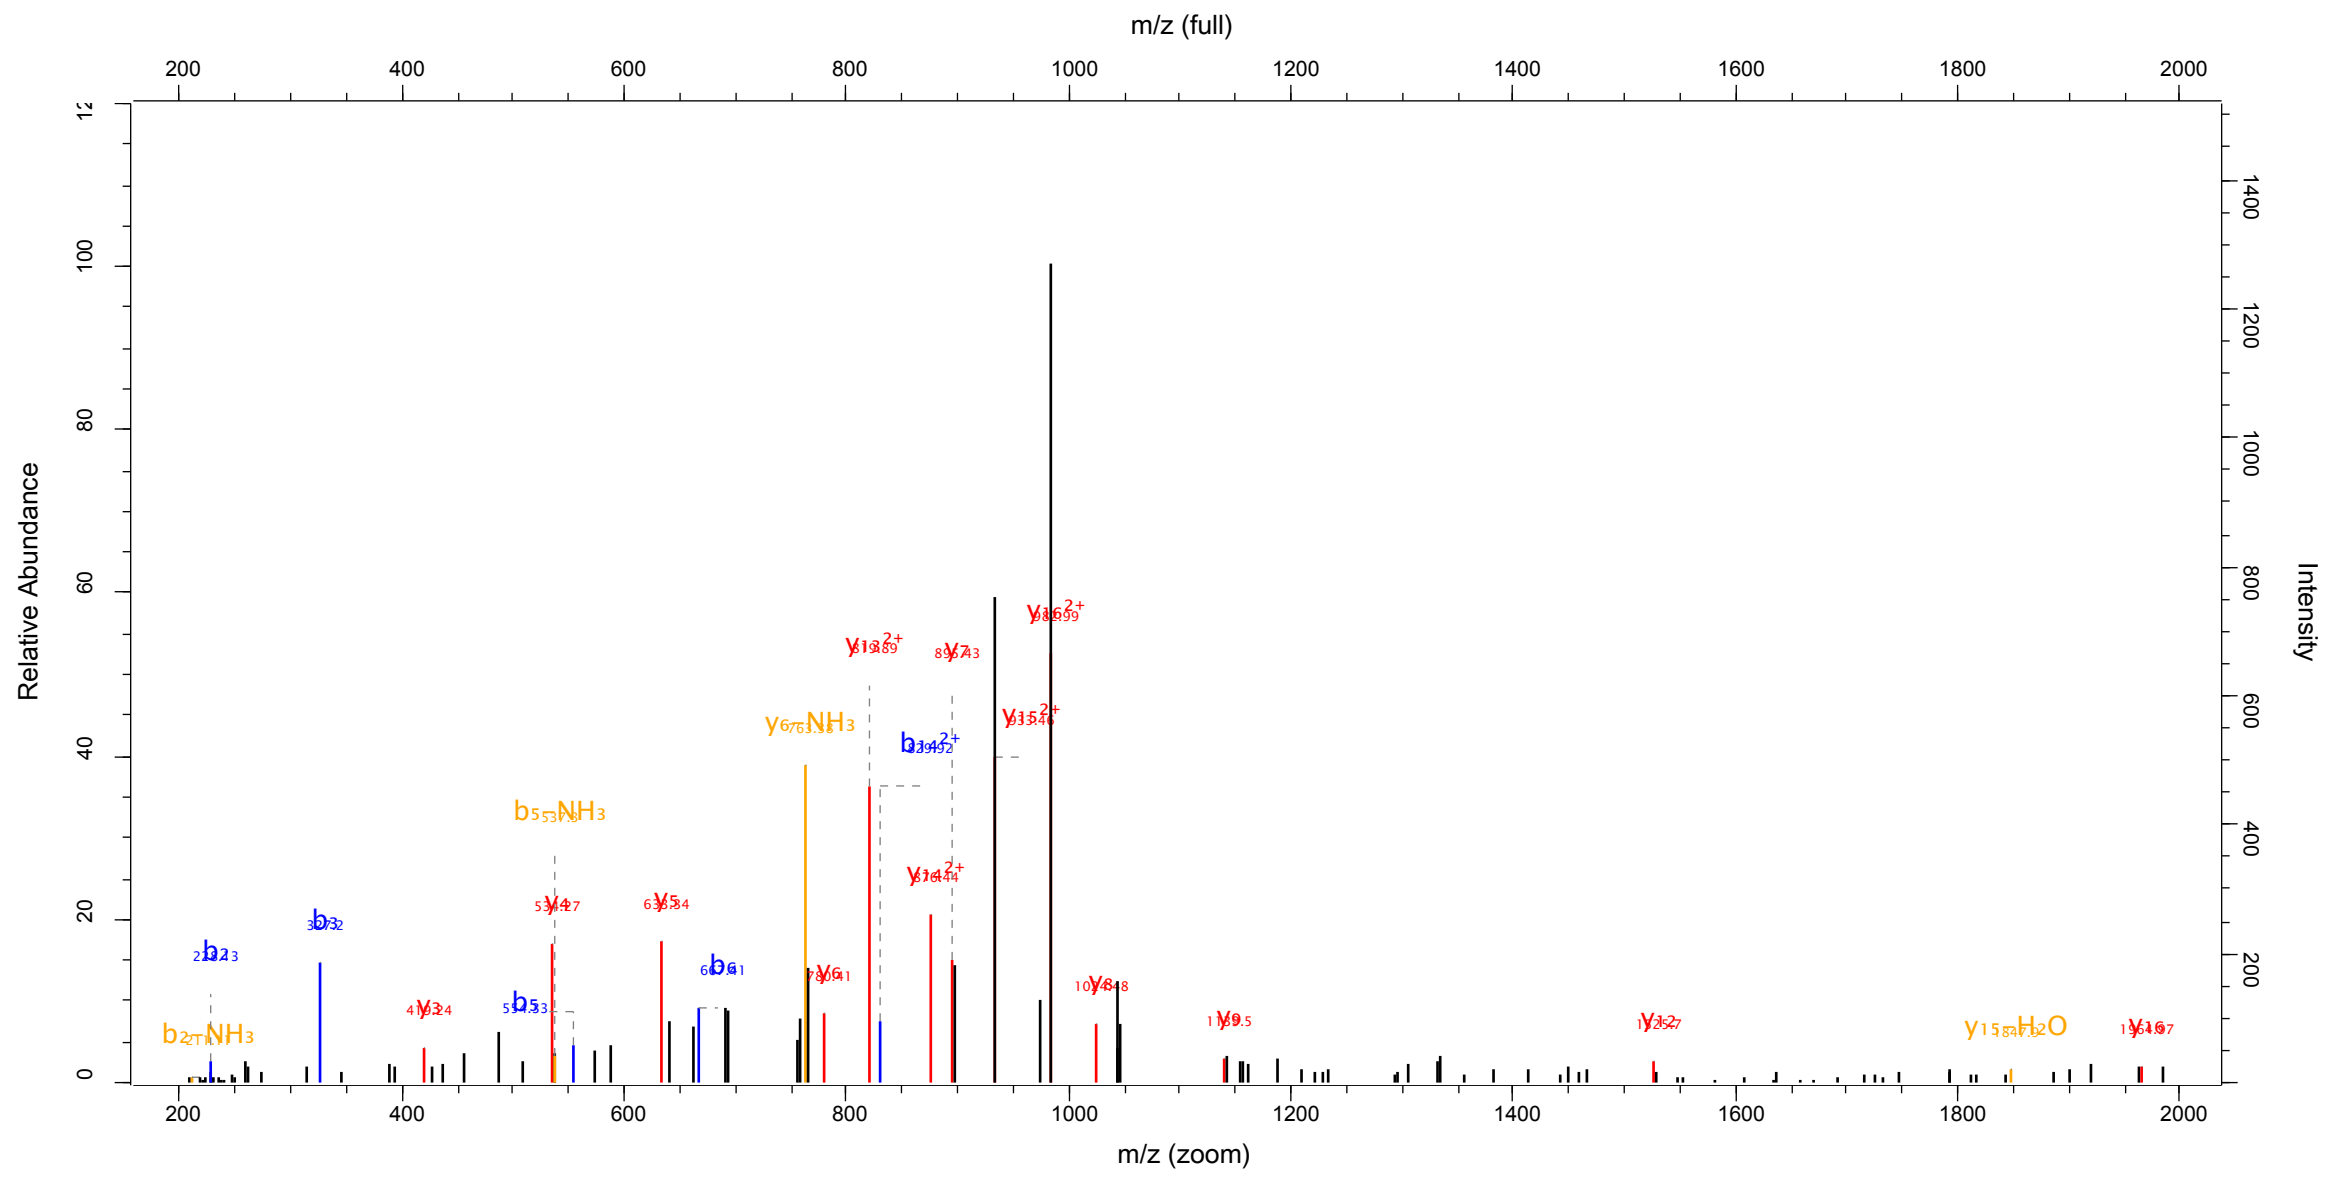

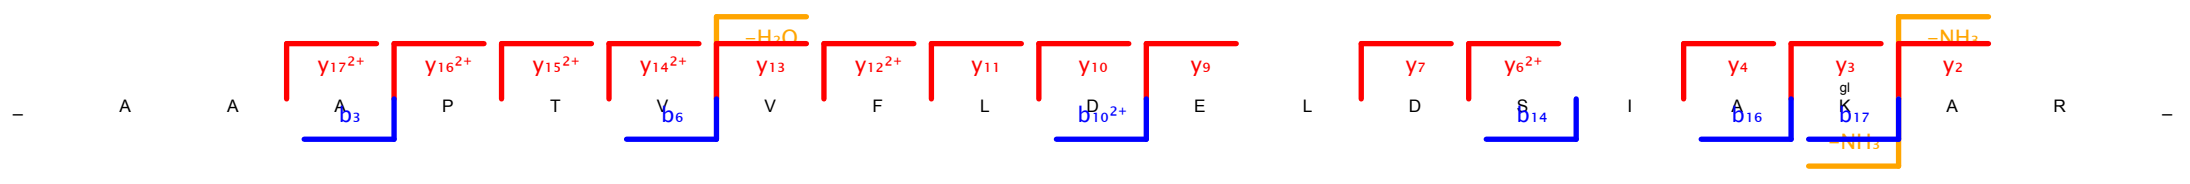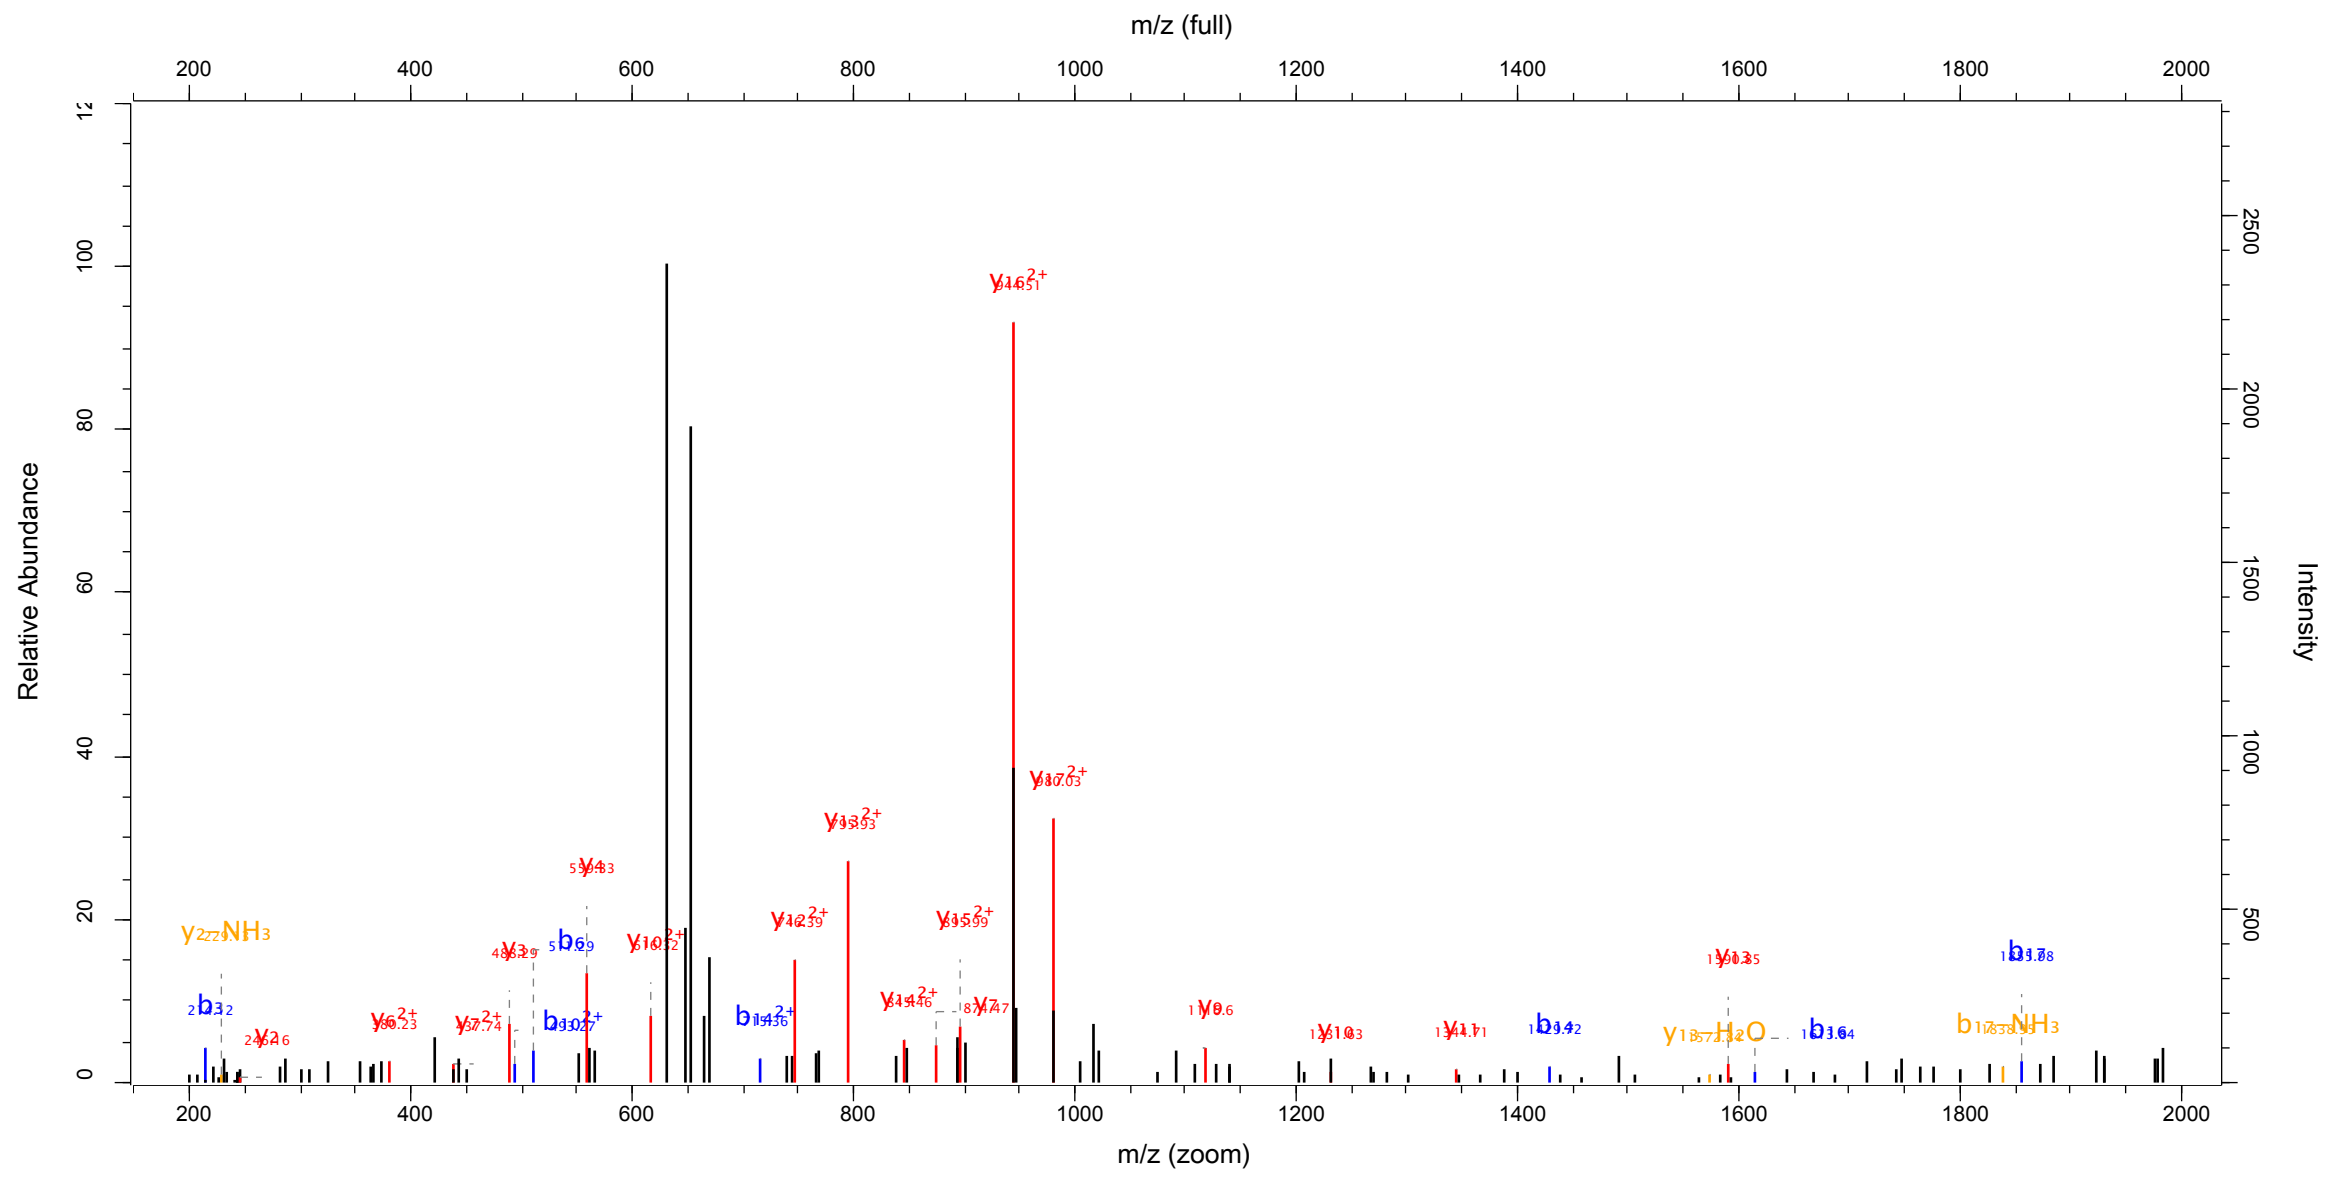

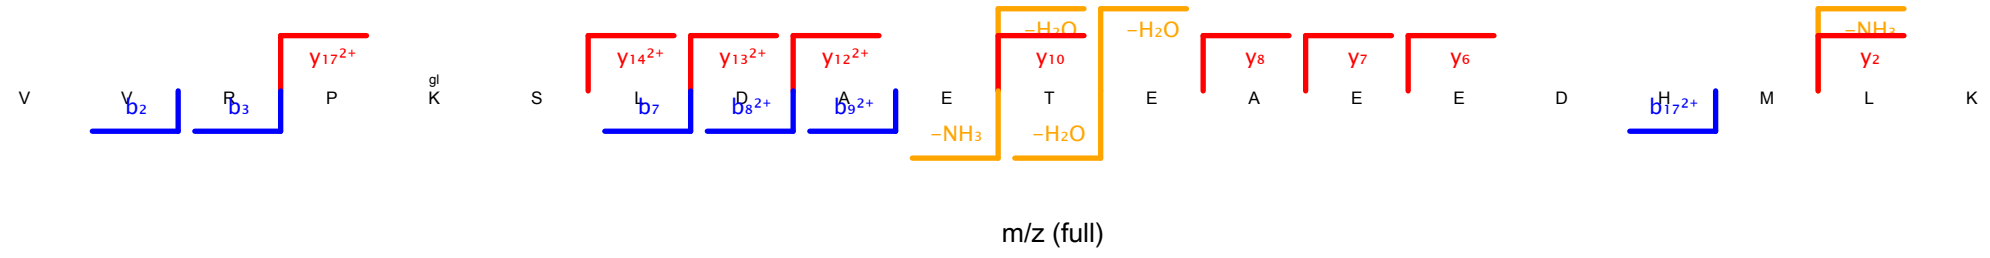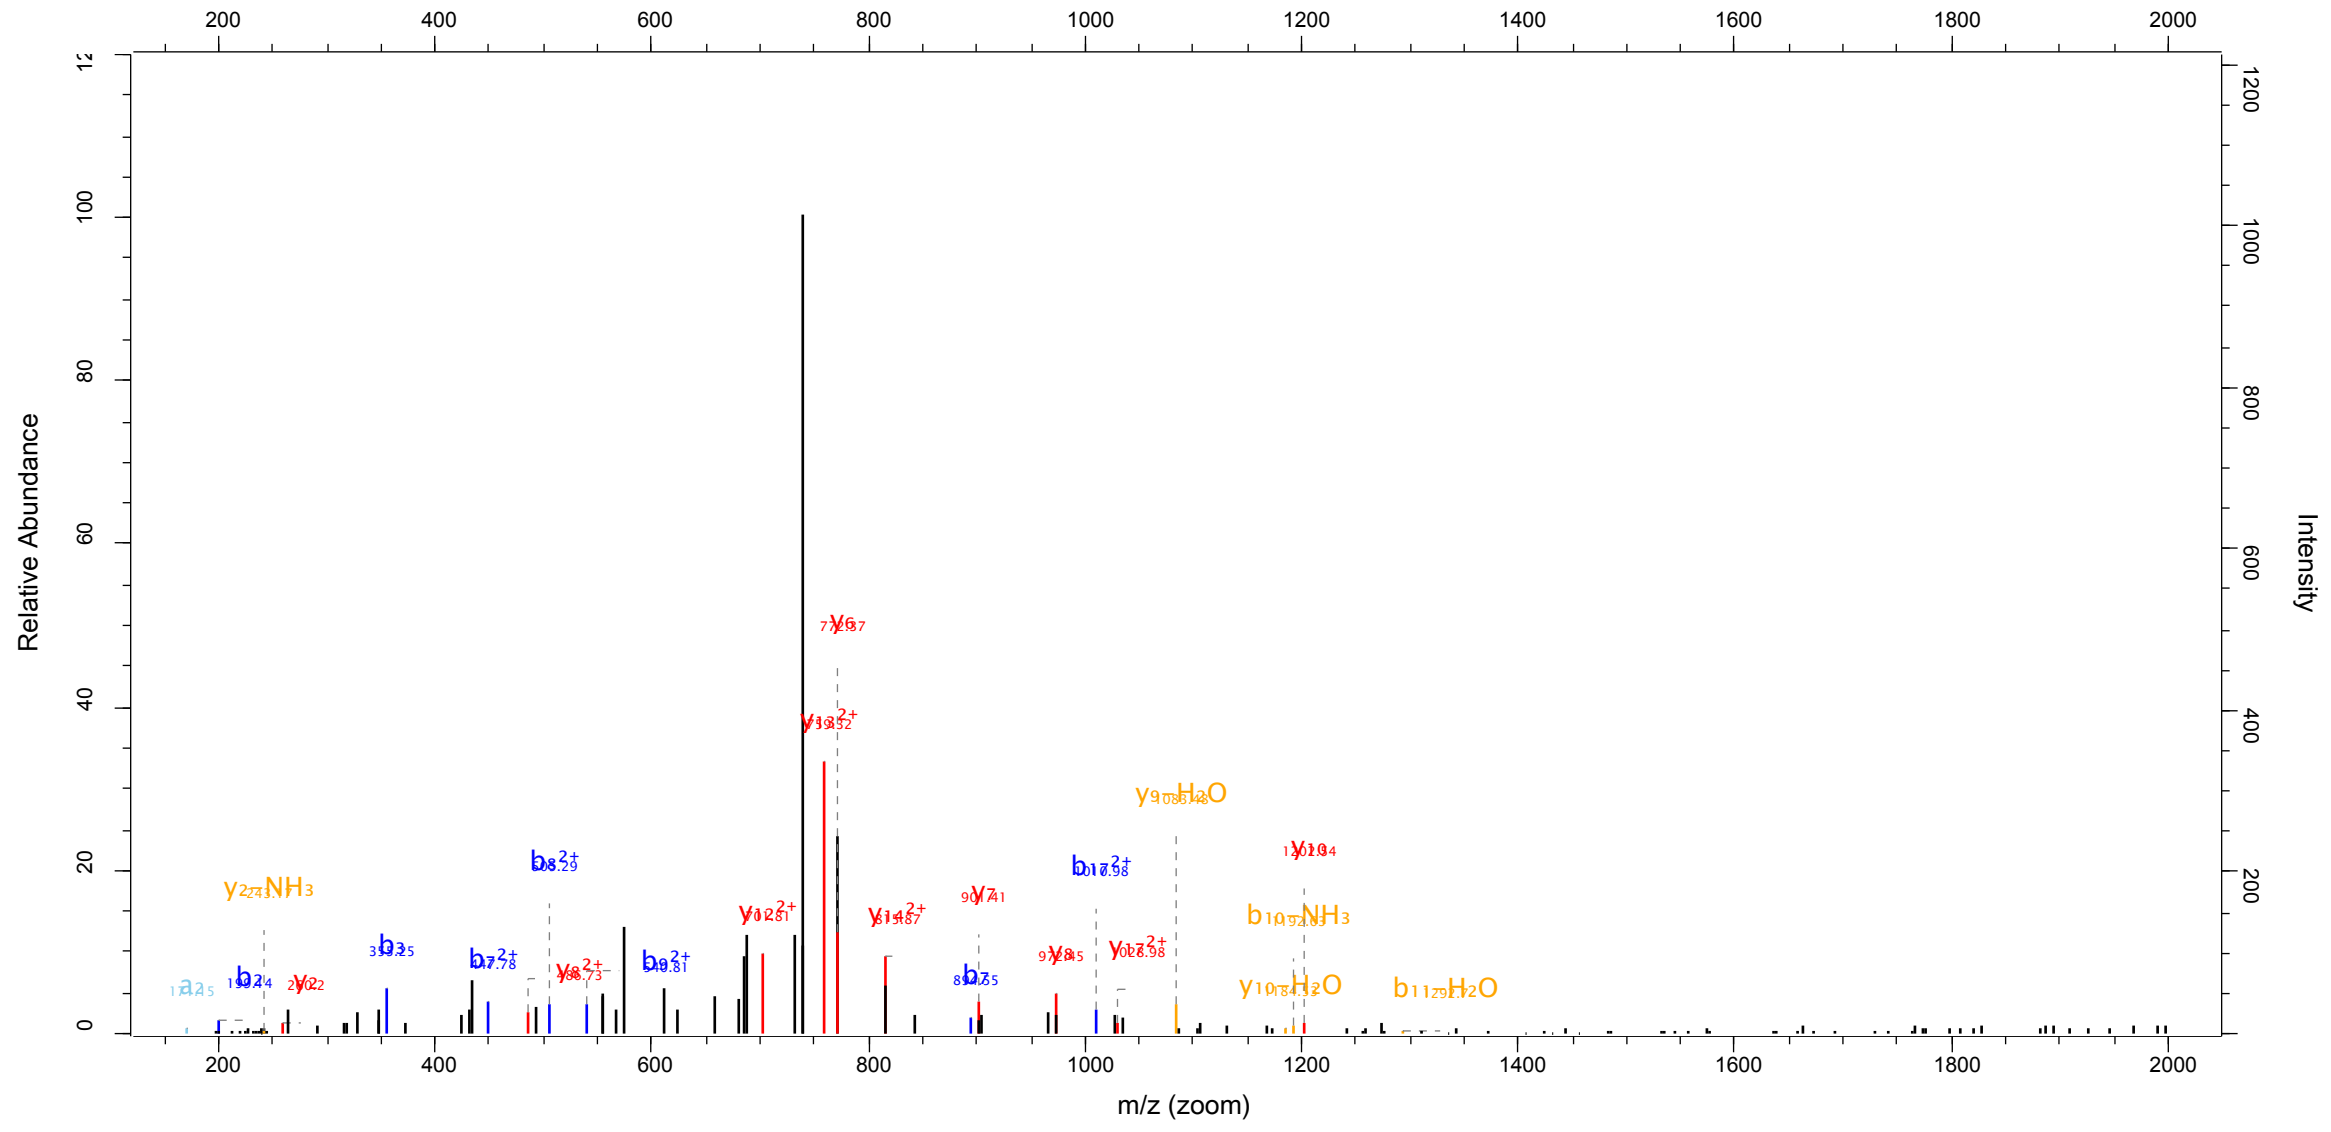

Scan number 11399 Raw file nak\_UBX2LSAX6\_8feb11\_06  
 Method ITMS; CID Pepti... 162.93

GlyGly Site Id 13

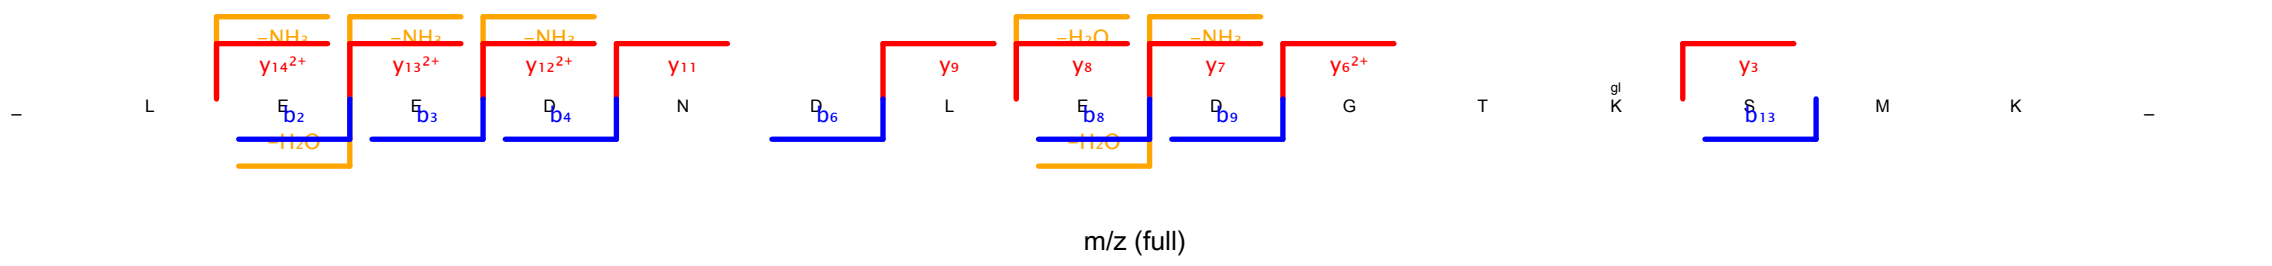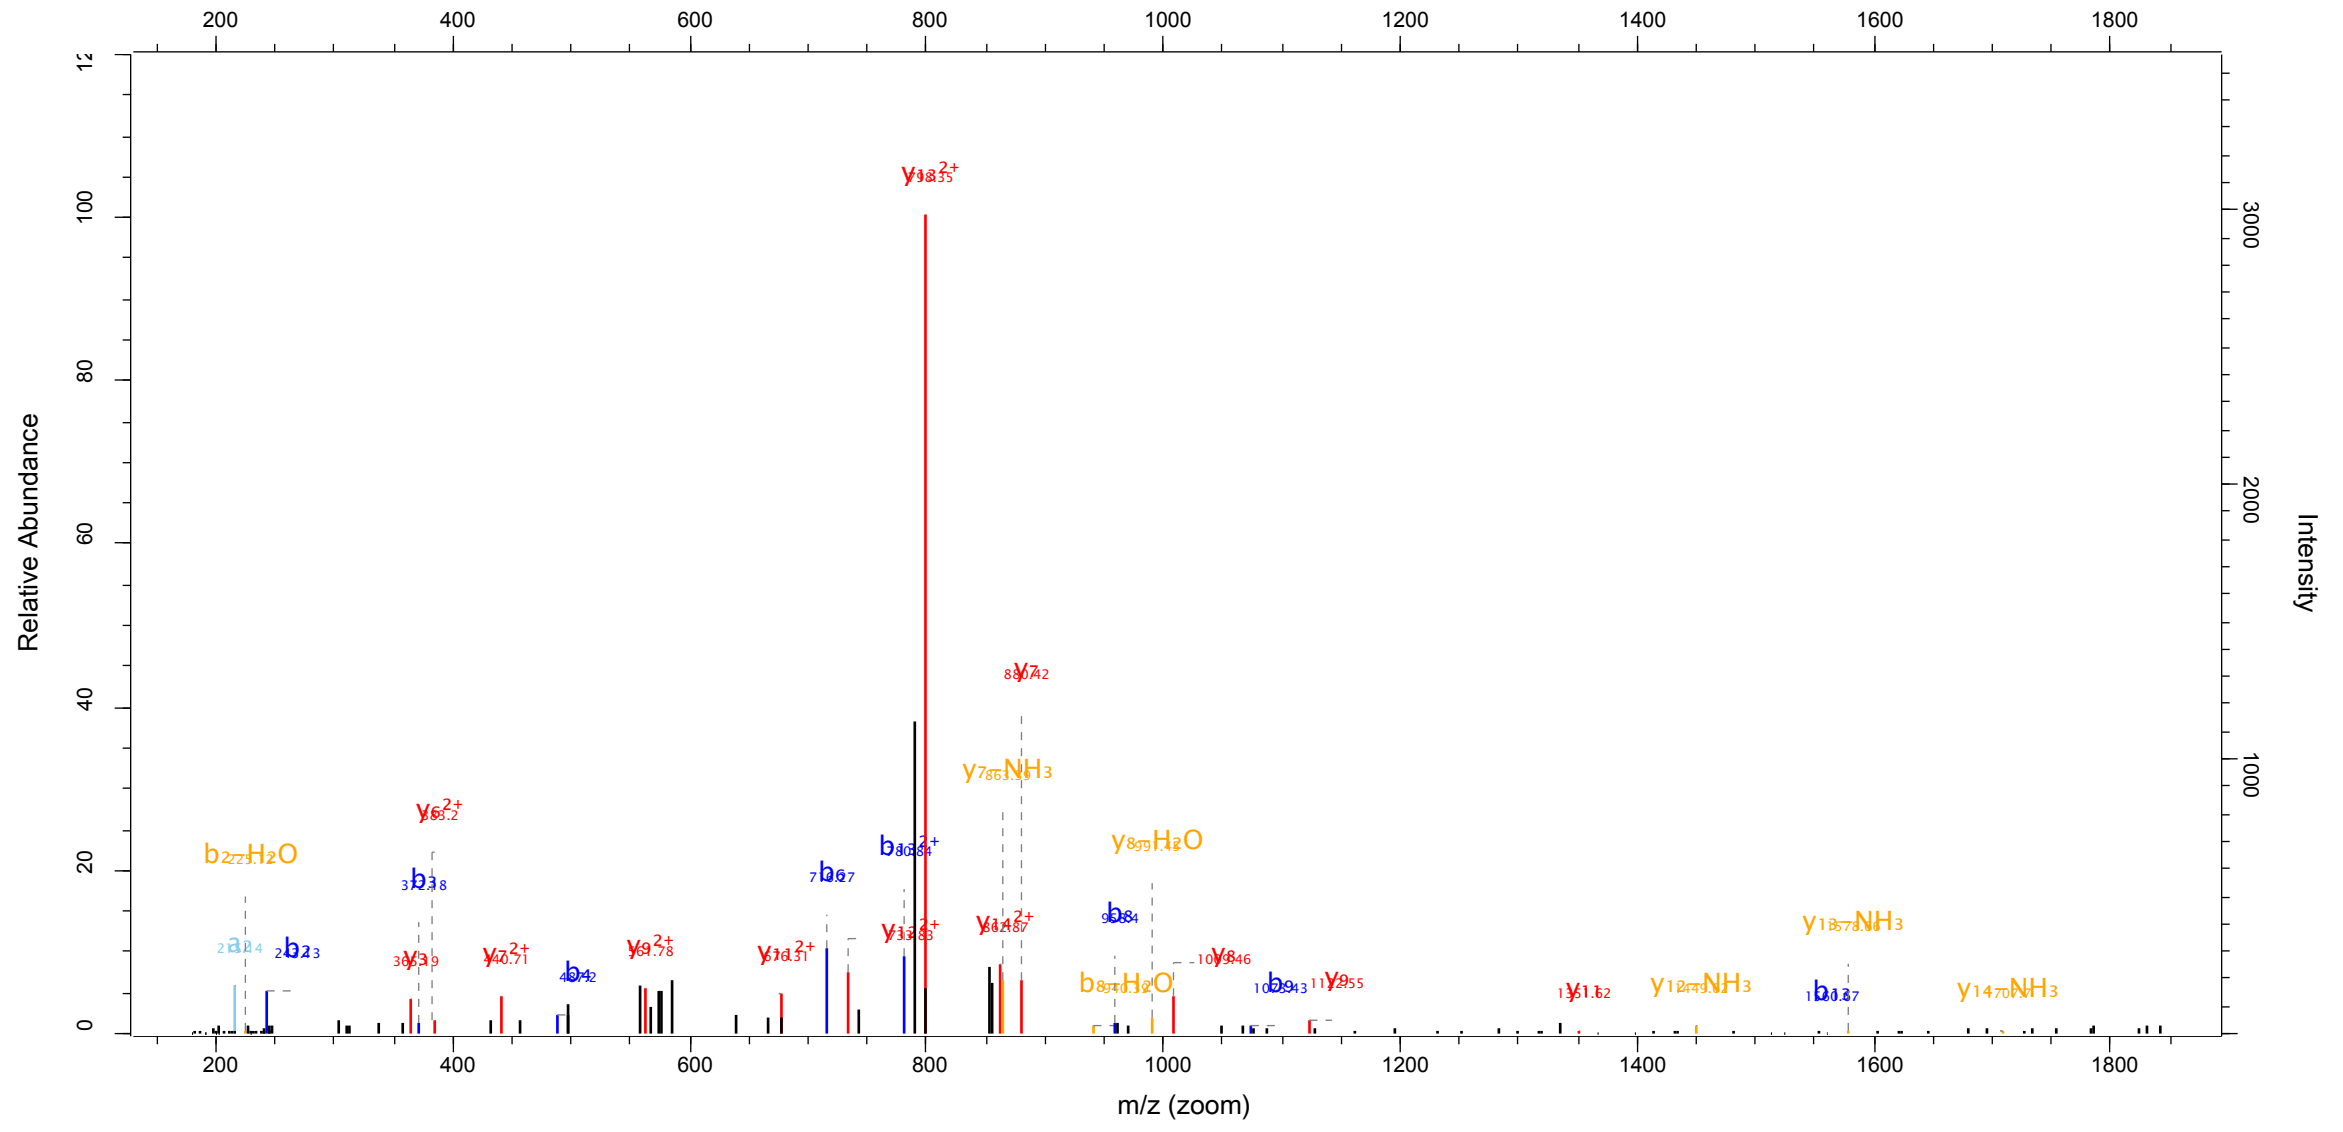

Scan number 28532 Raw file nak\_cdc48UbconjugatescontrolSAX6\_14may10\_17  
 Method ITMS; CID Pepti... 106.69

GlyGly Site Id 14

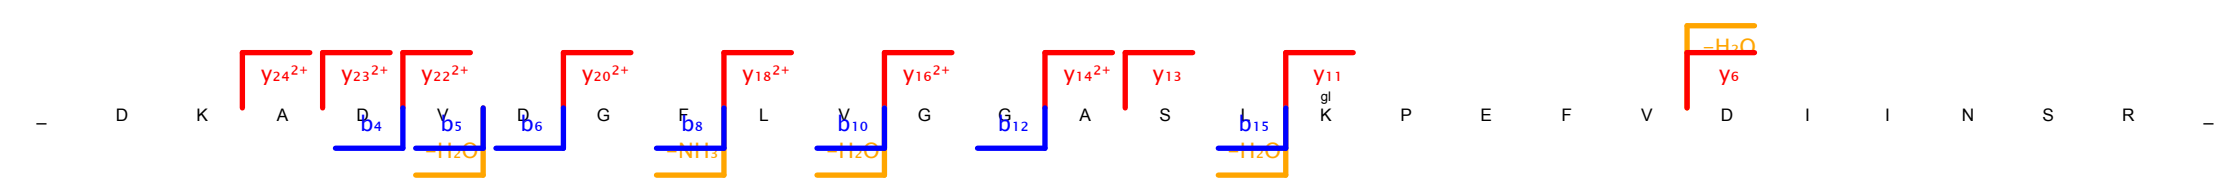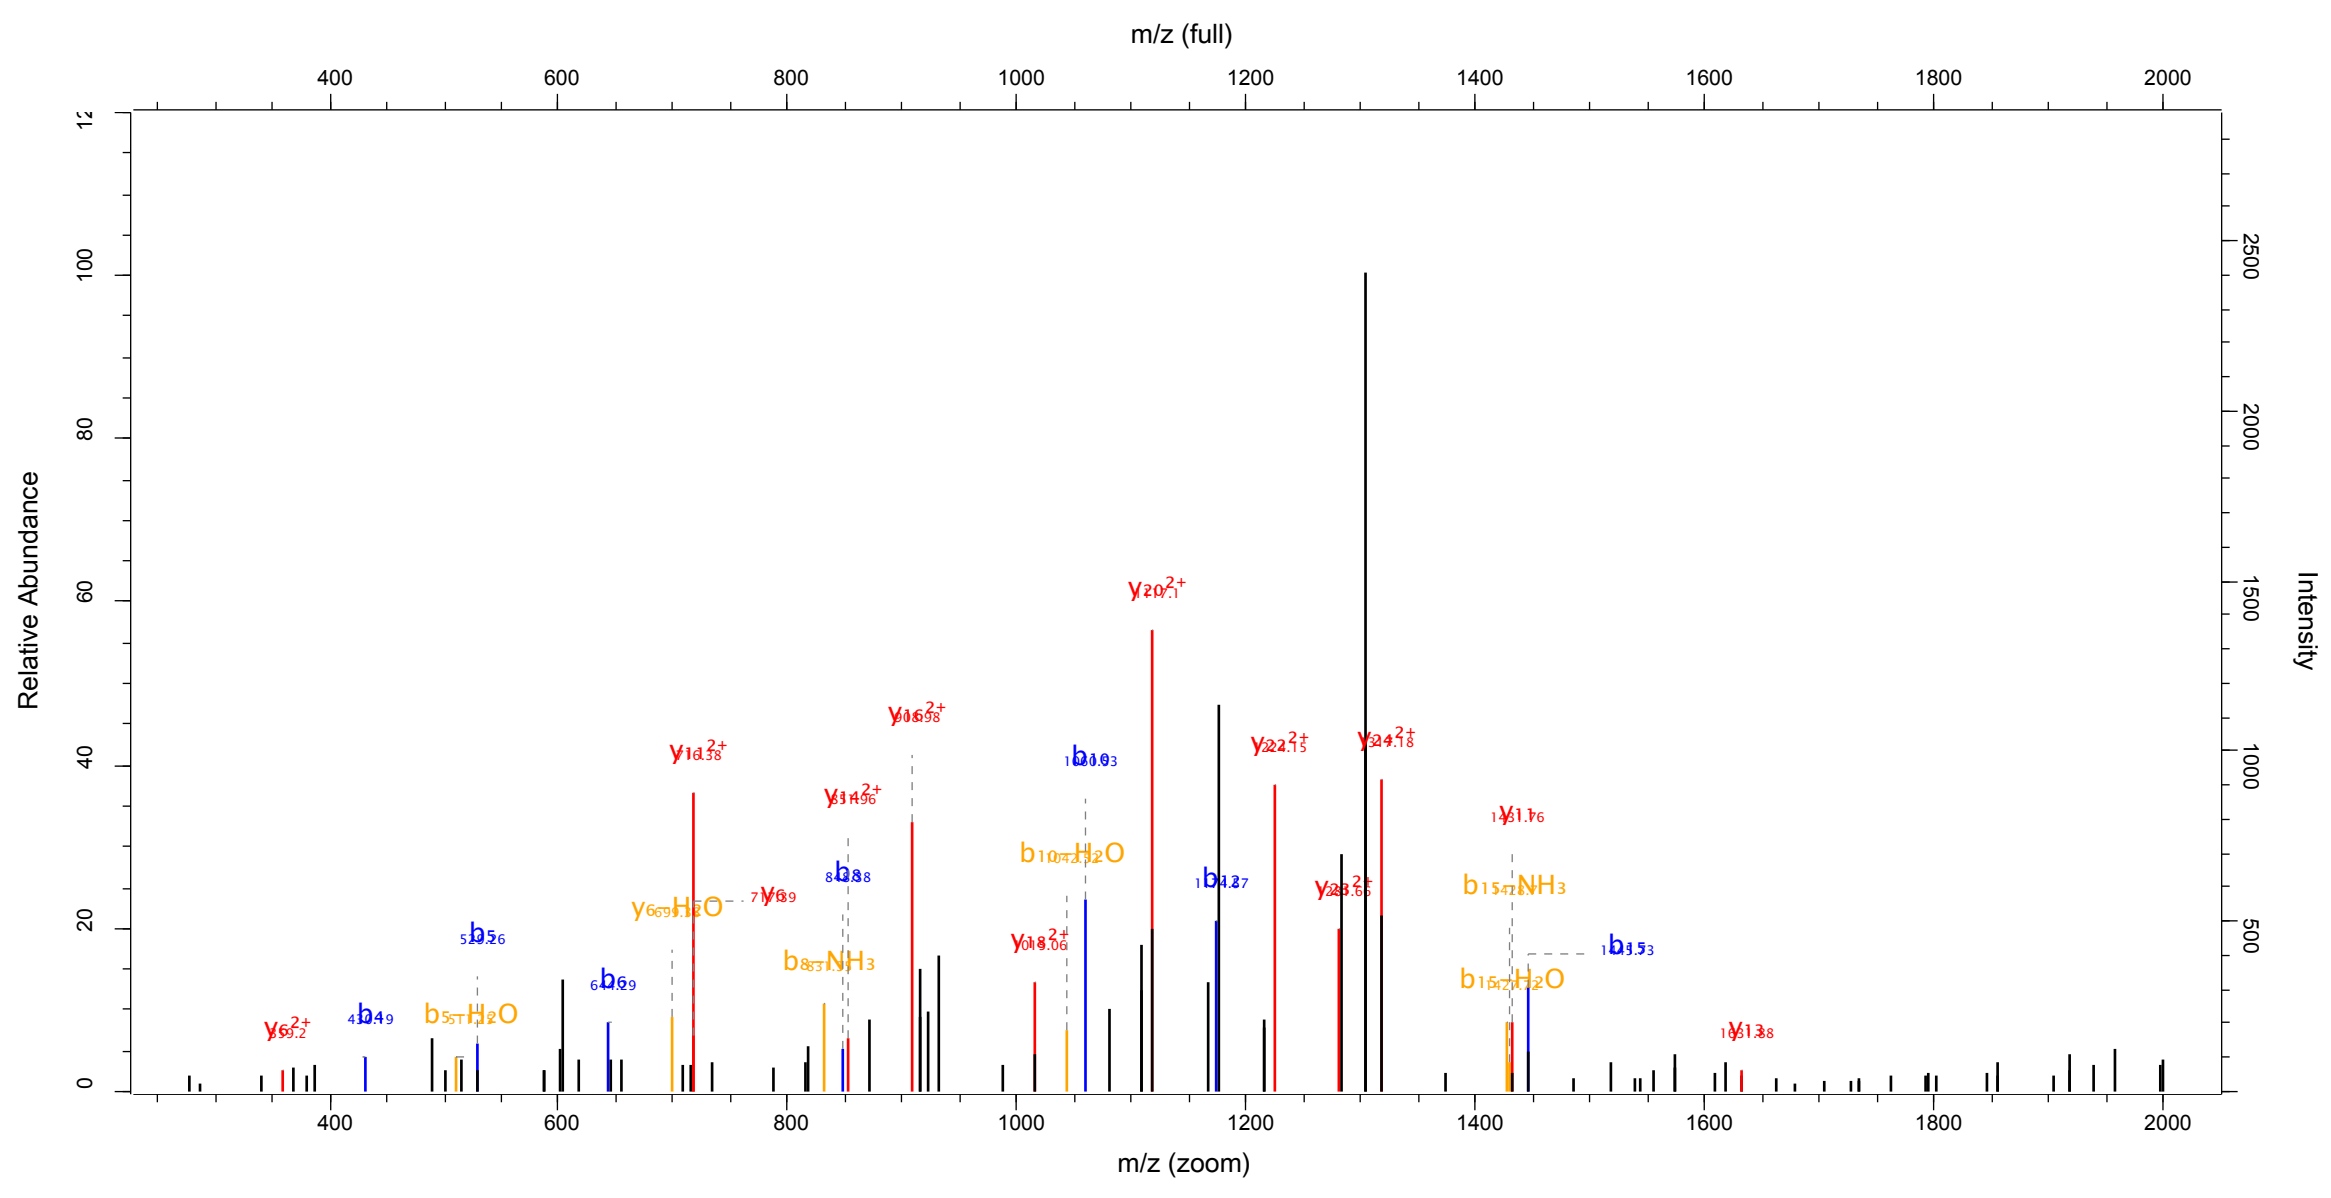

Scan number  
Method

2348  
ITMS; CID

Raw file  
Pepti...

nak\_cdc48UbconjugatesSAX1\_14may10\_05  
186.76

GlyGly Site Id 15

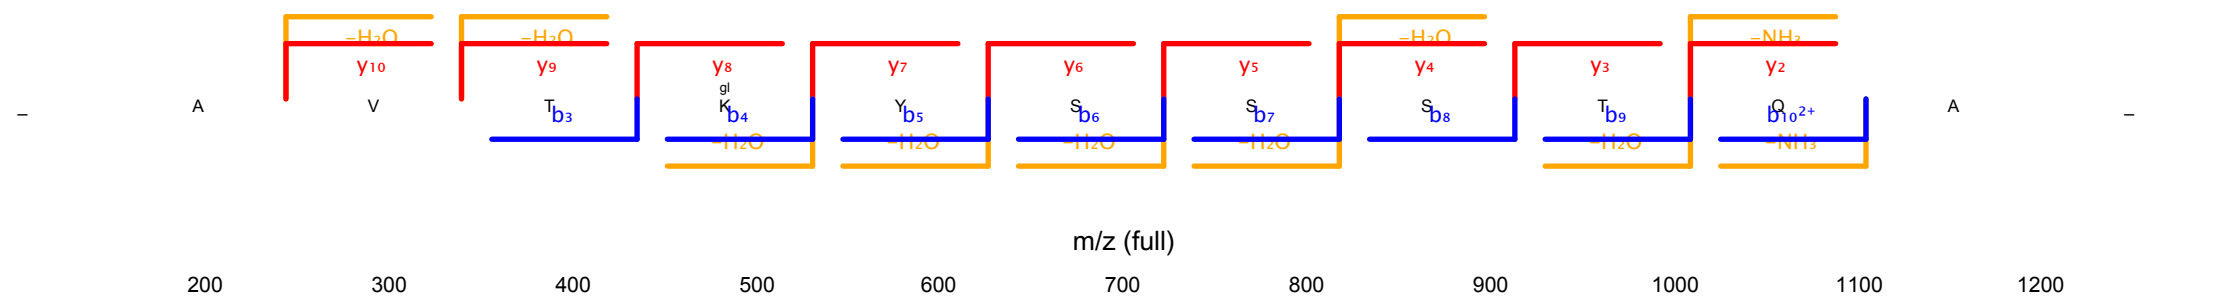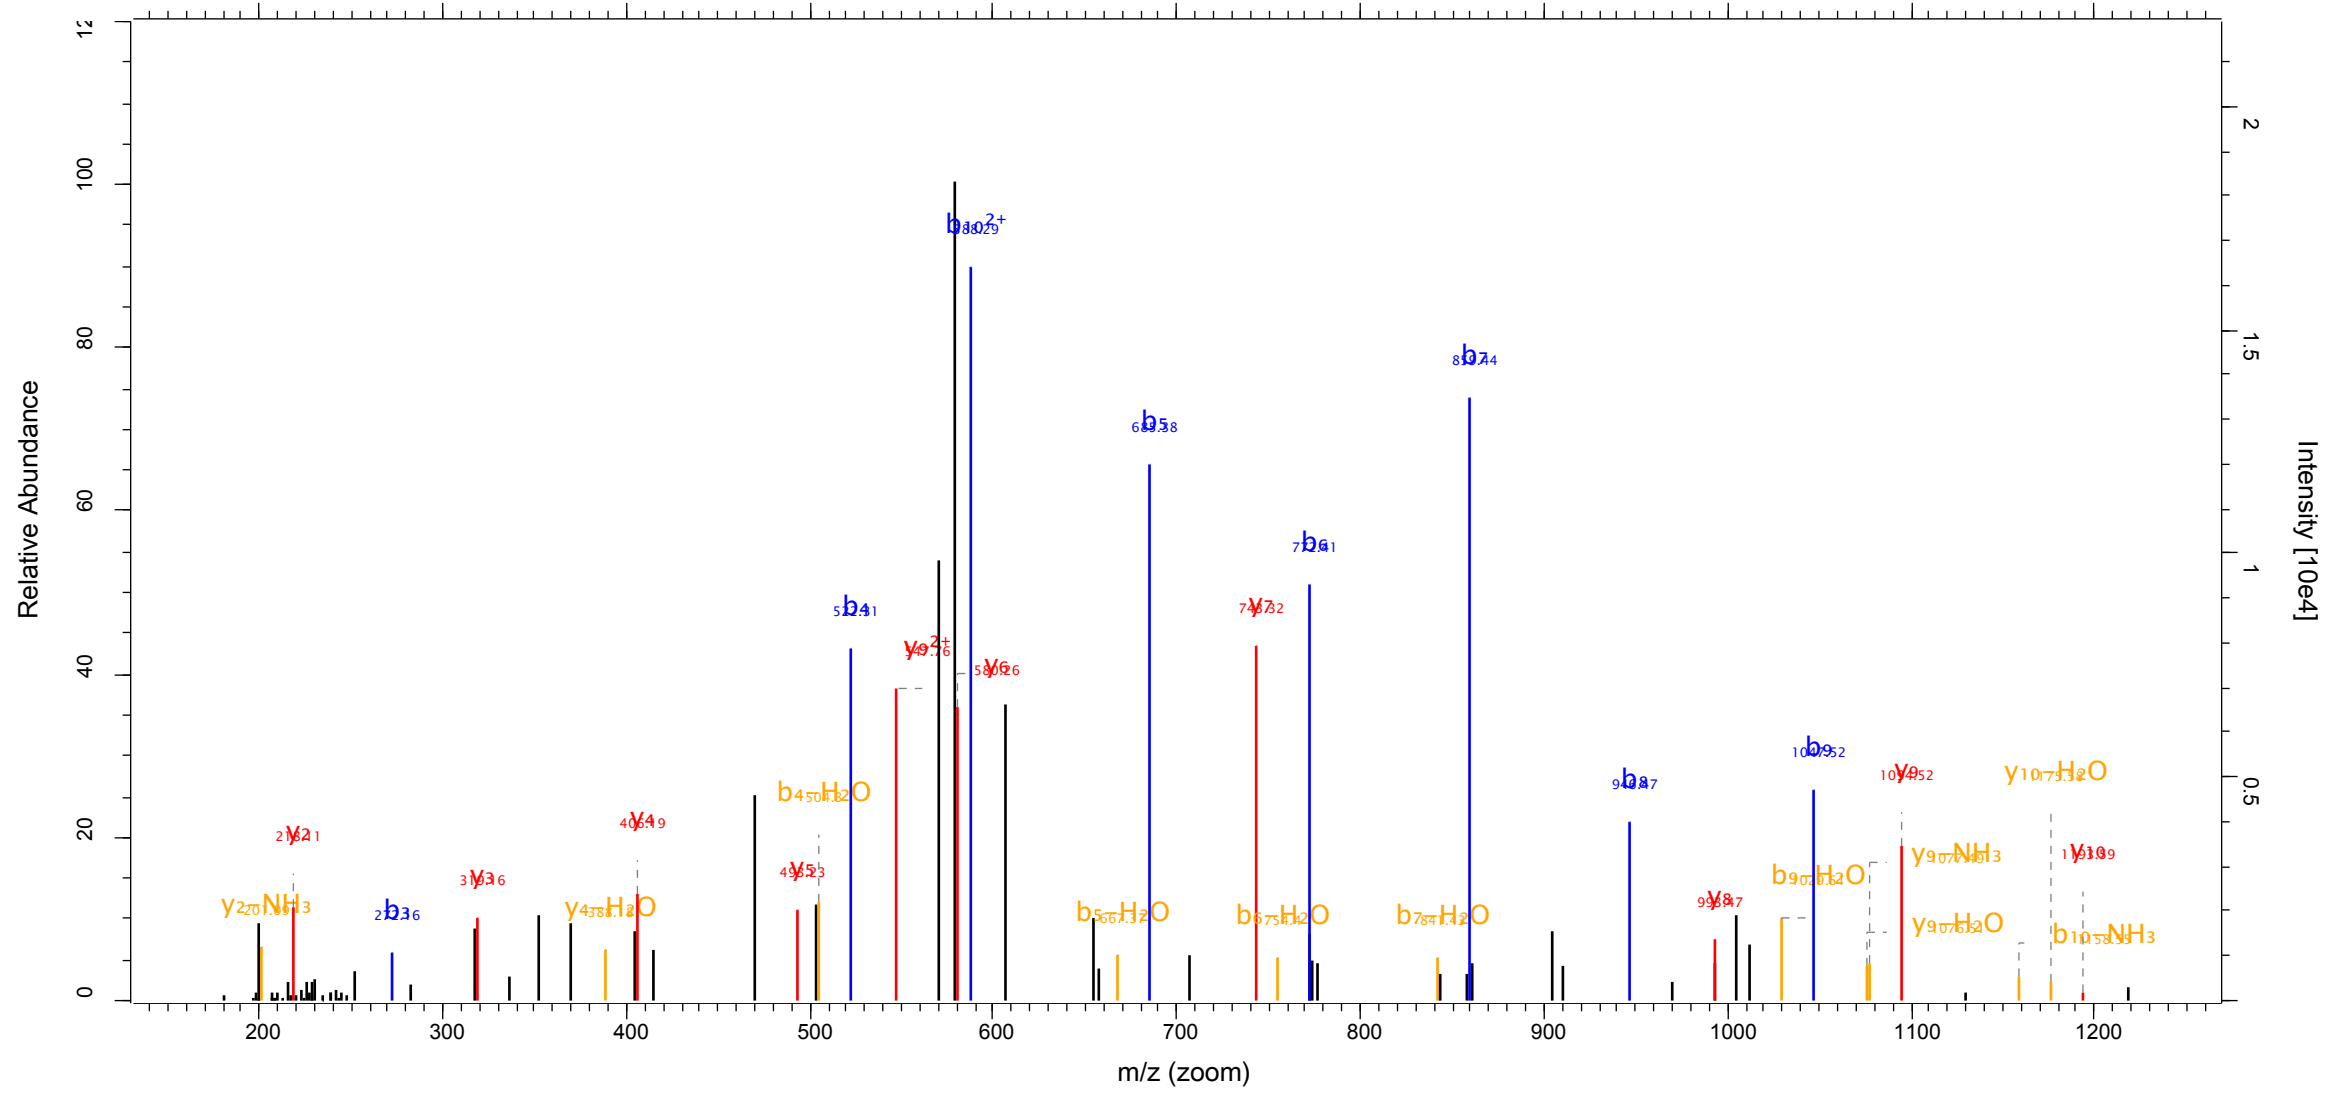



Scan number 1548 Raw file nak\_ubx4HeavySAX1\_11nov06  
 Method ITMS; CID Pepti... 241.84

GlyGly Site Id 16

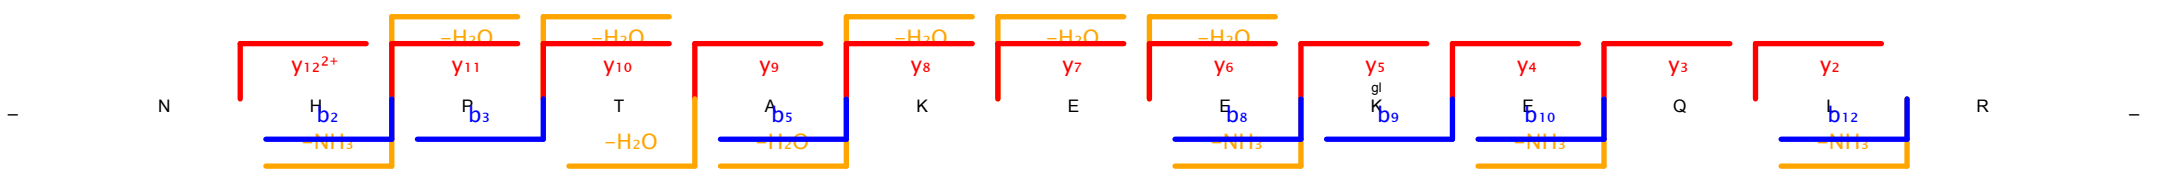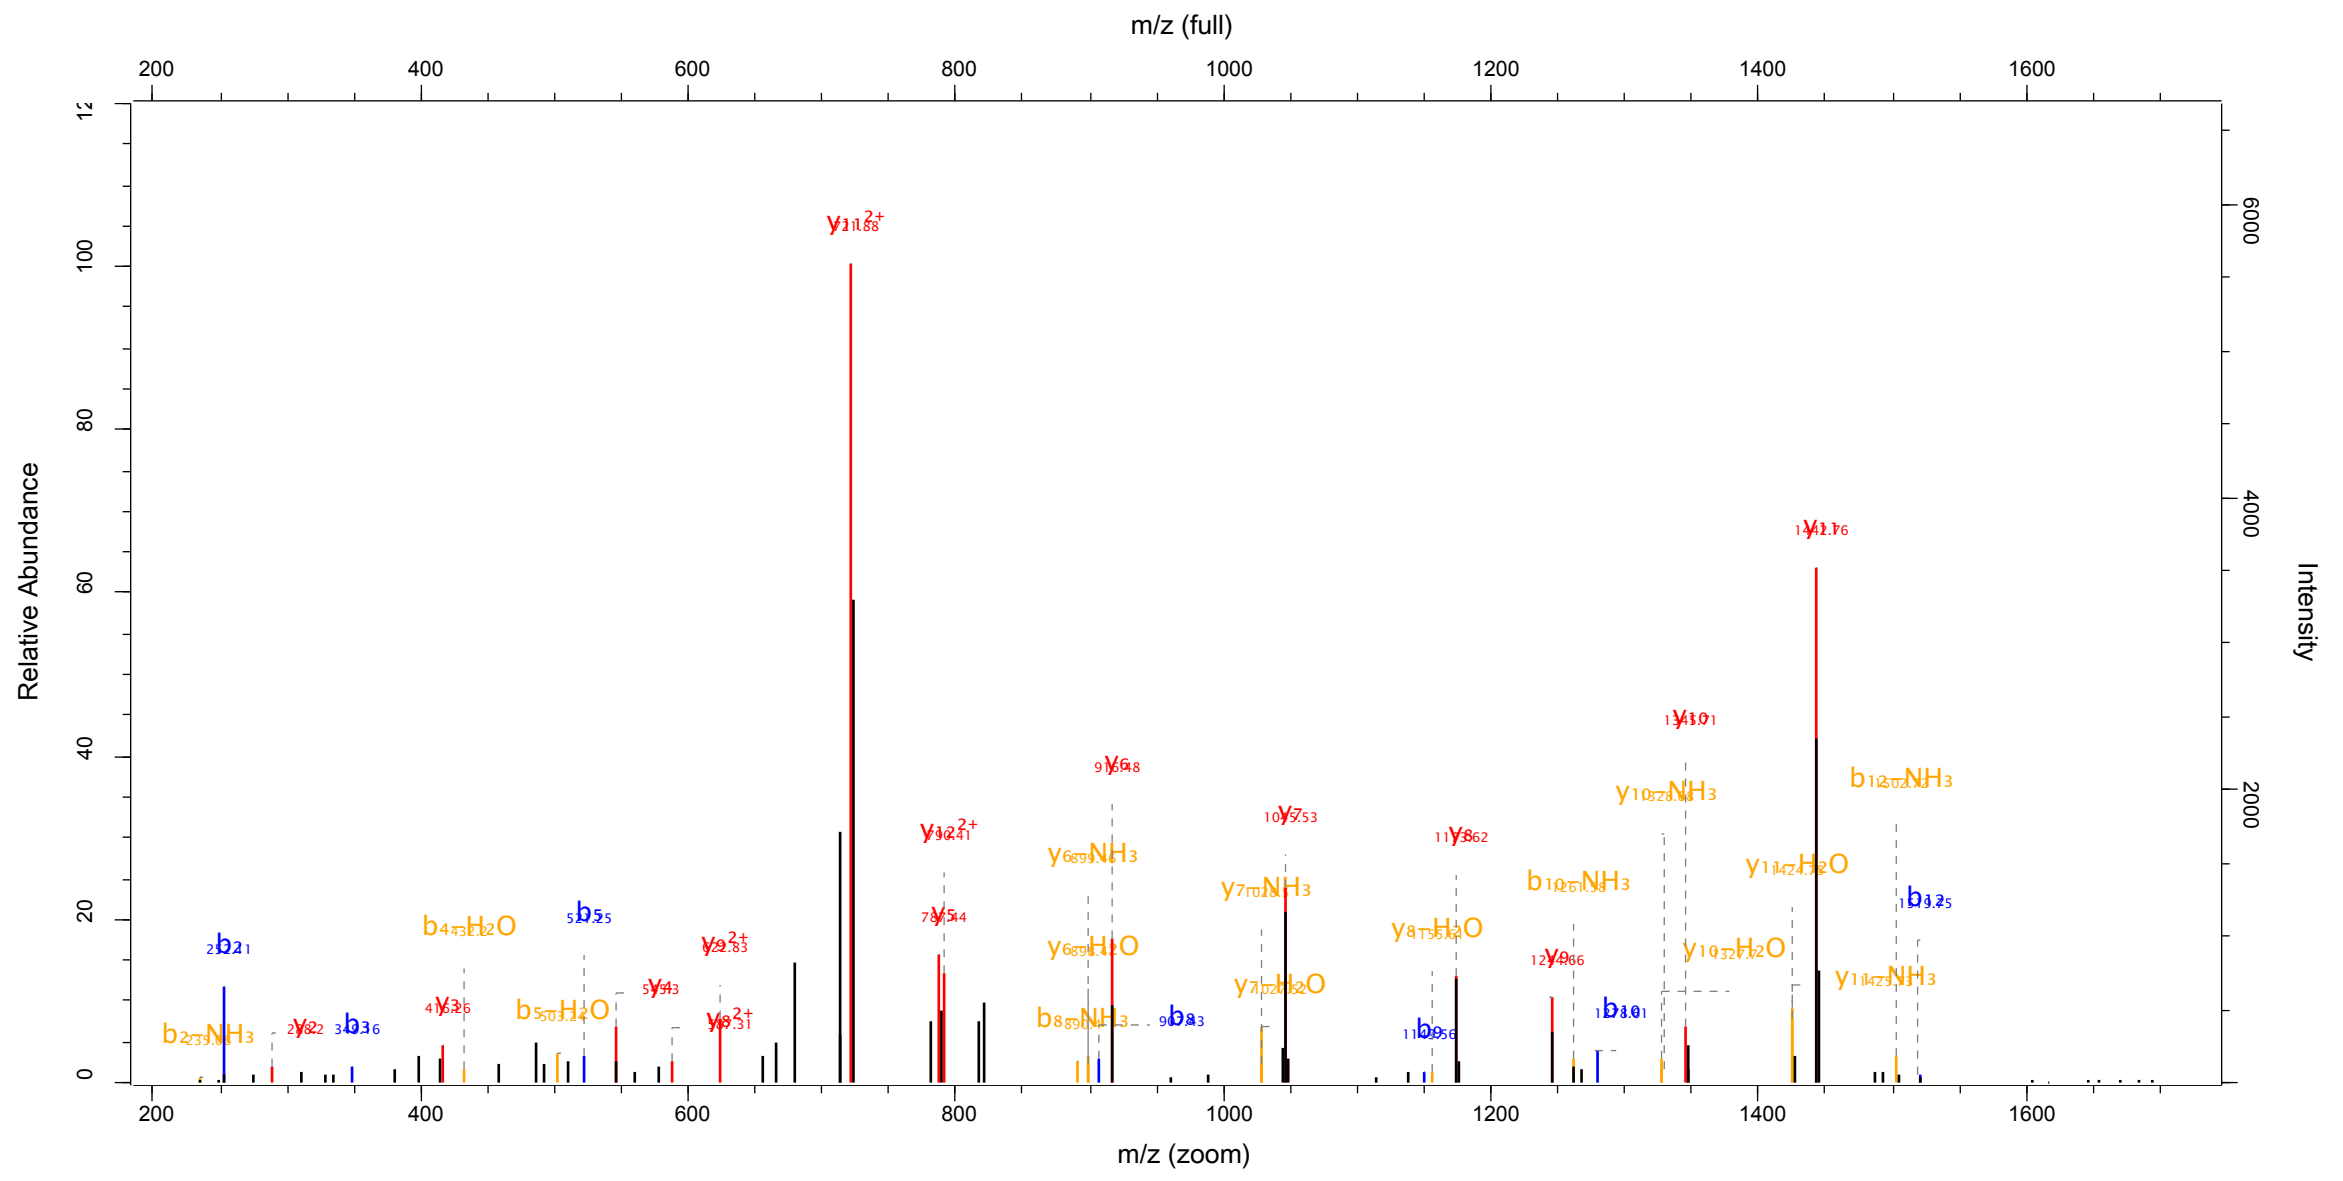

Scan number

25163

Raw file

nak\_WTonetoneSAX6\_4feb11\_06

GlyGly Site Id 17

Method

ITMS; CID

Pepti...

84.84

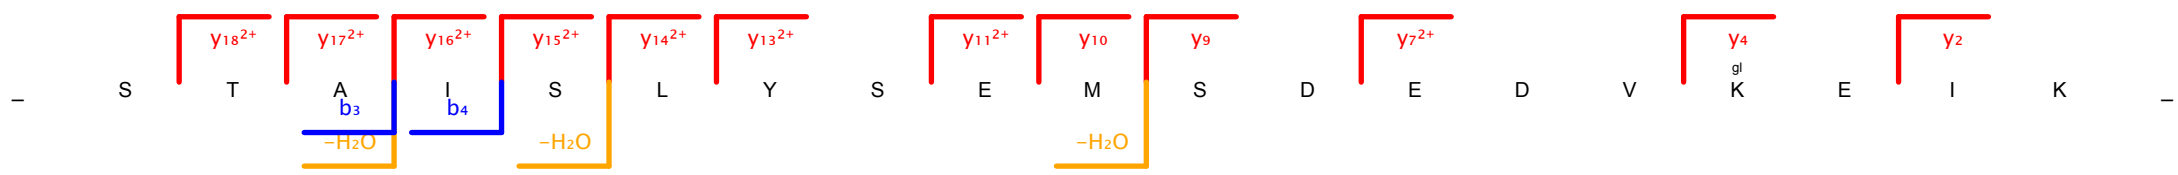

m/z (full)

200 400 600 800 1000 1200 1400 1600 1800 2000

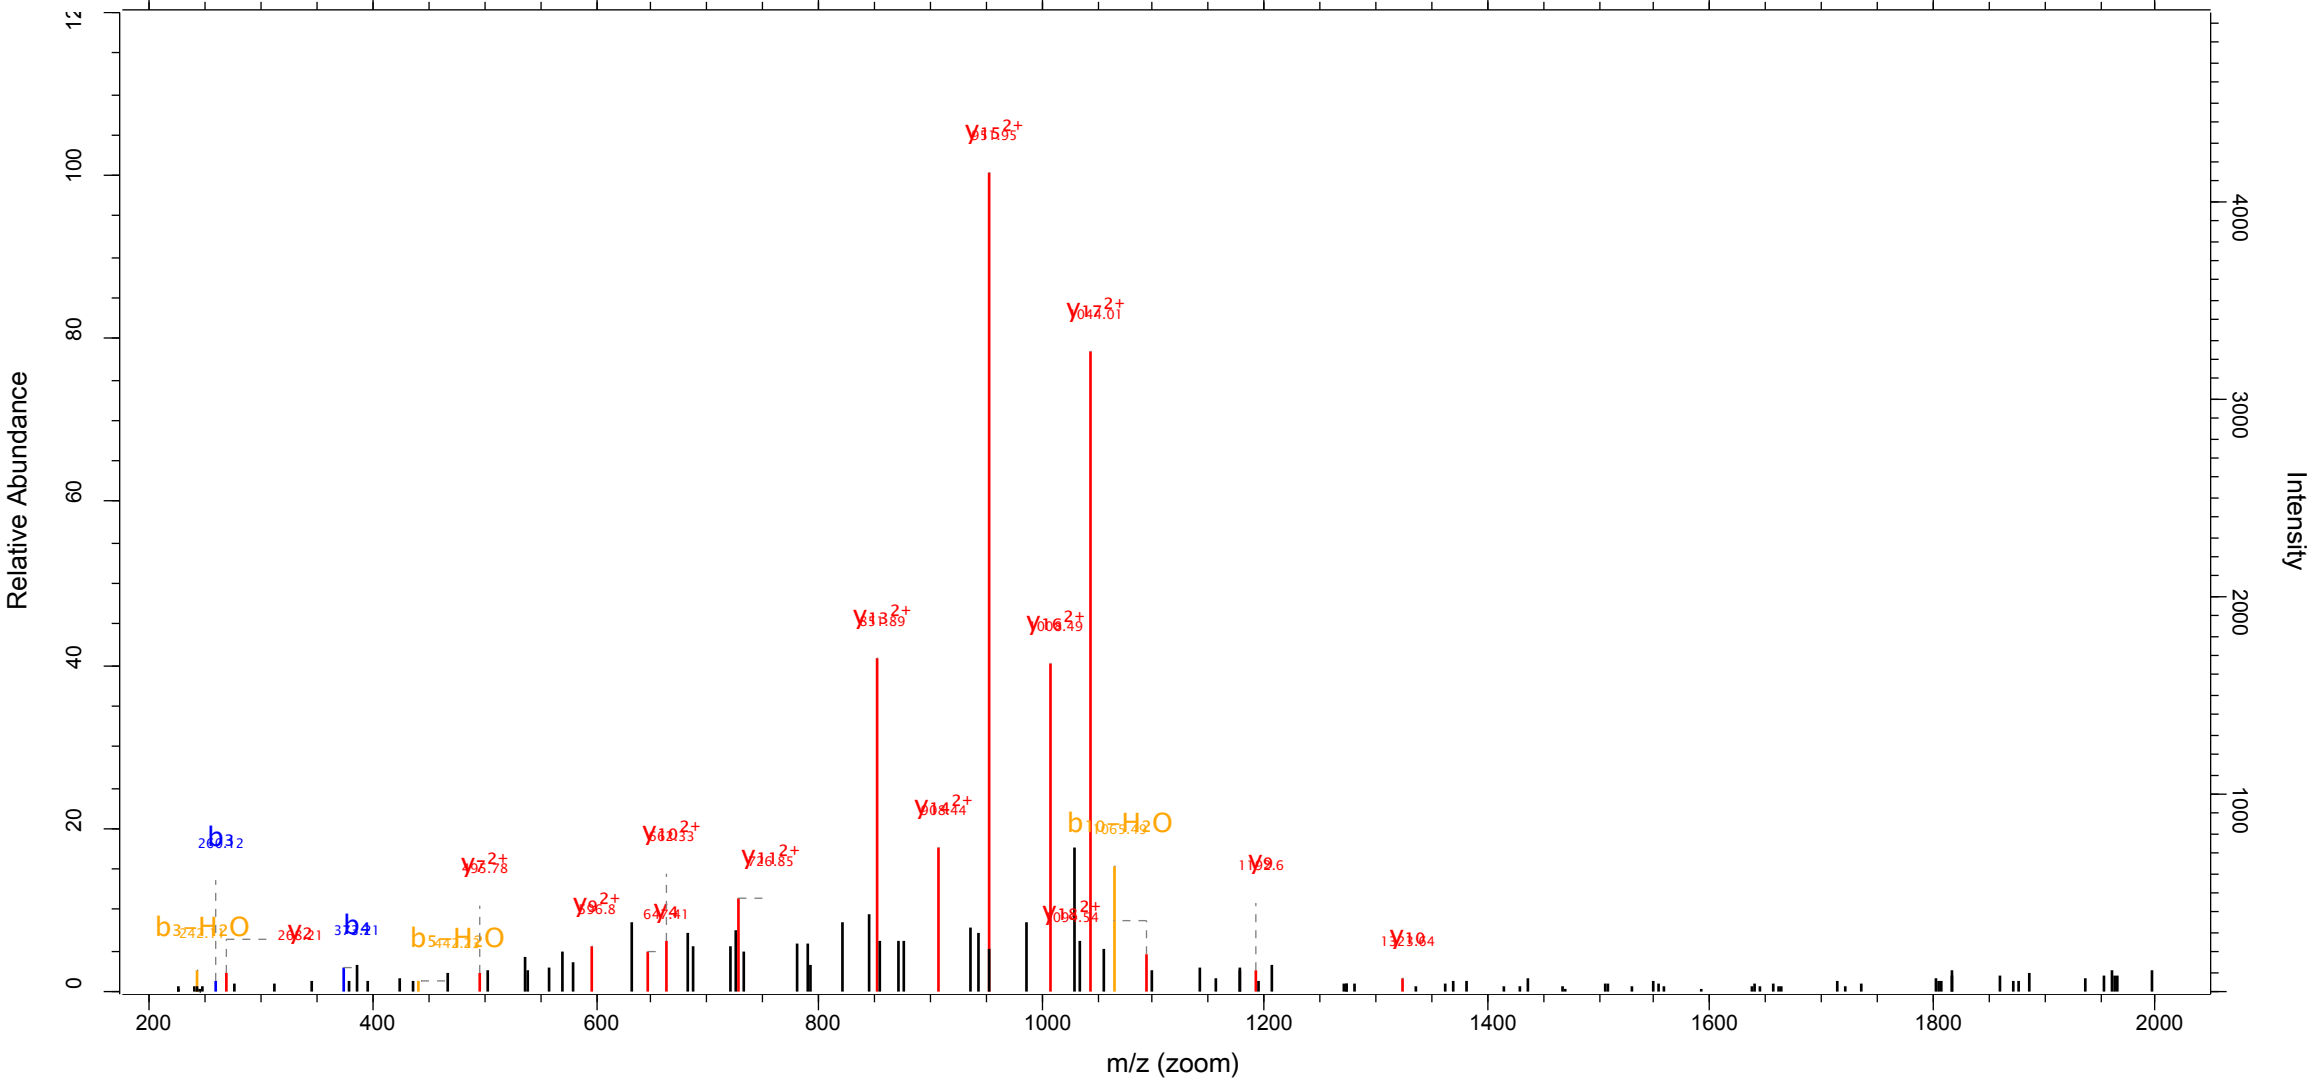

GlyGly Site Id 18

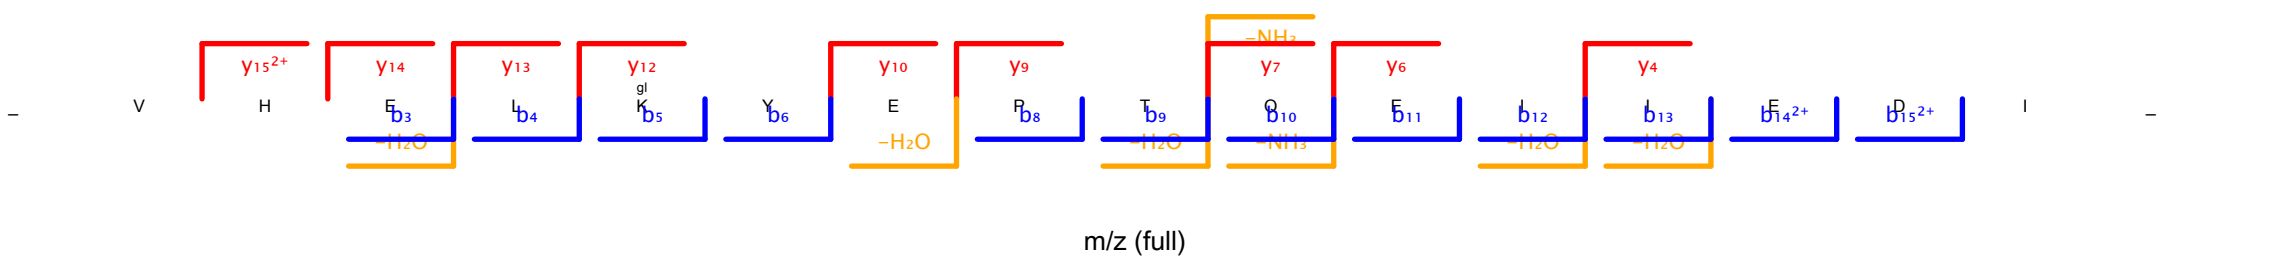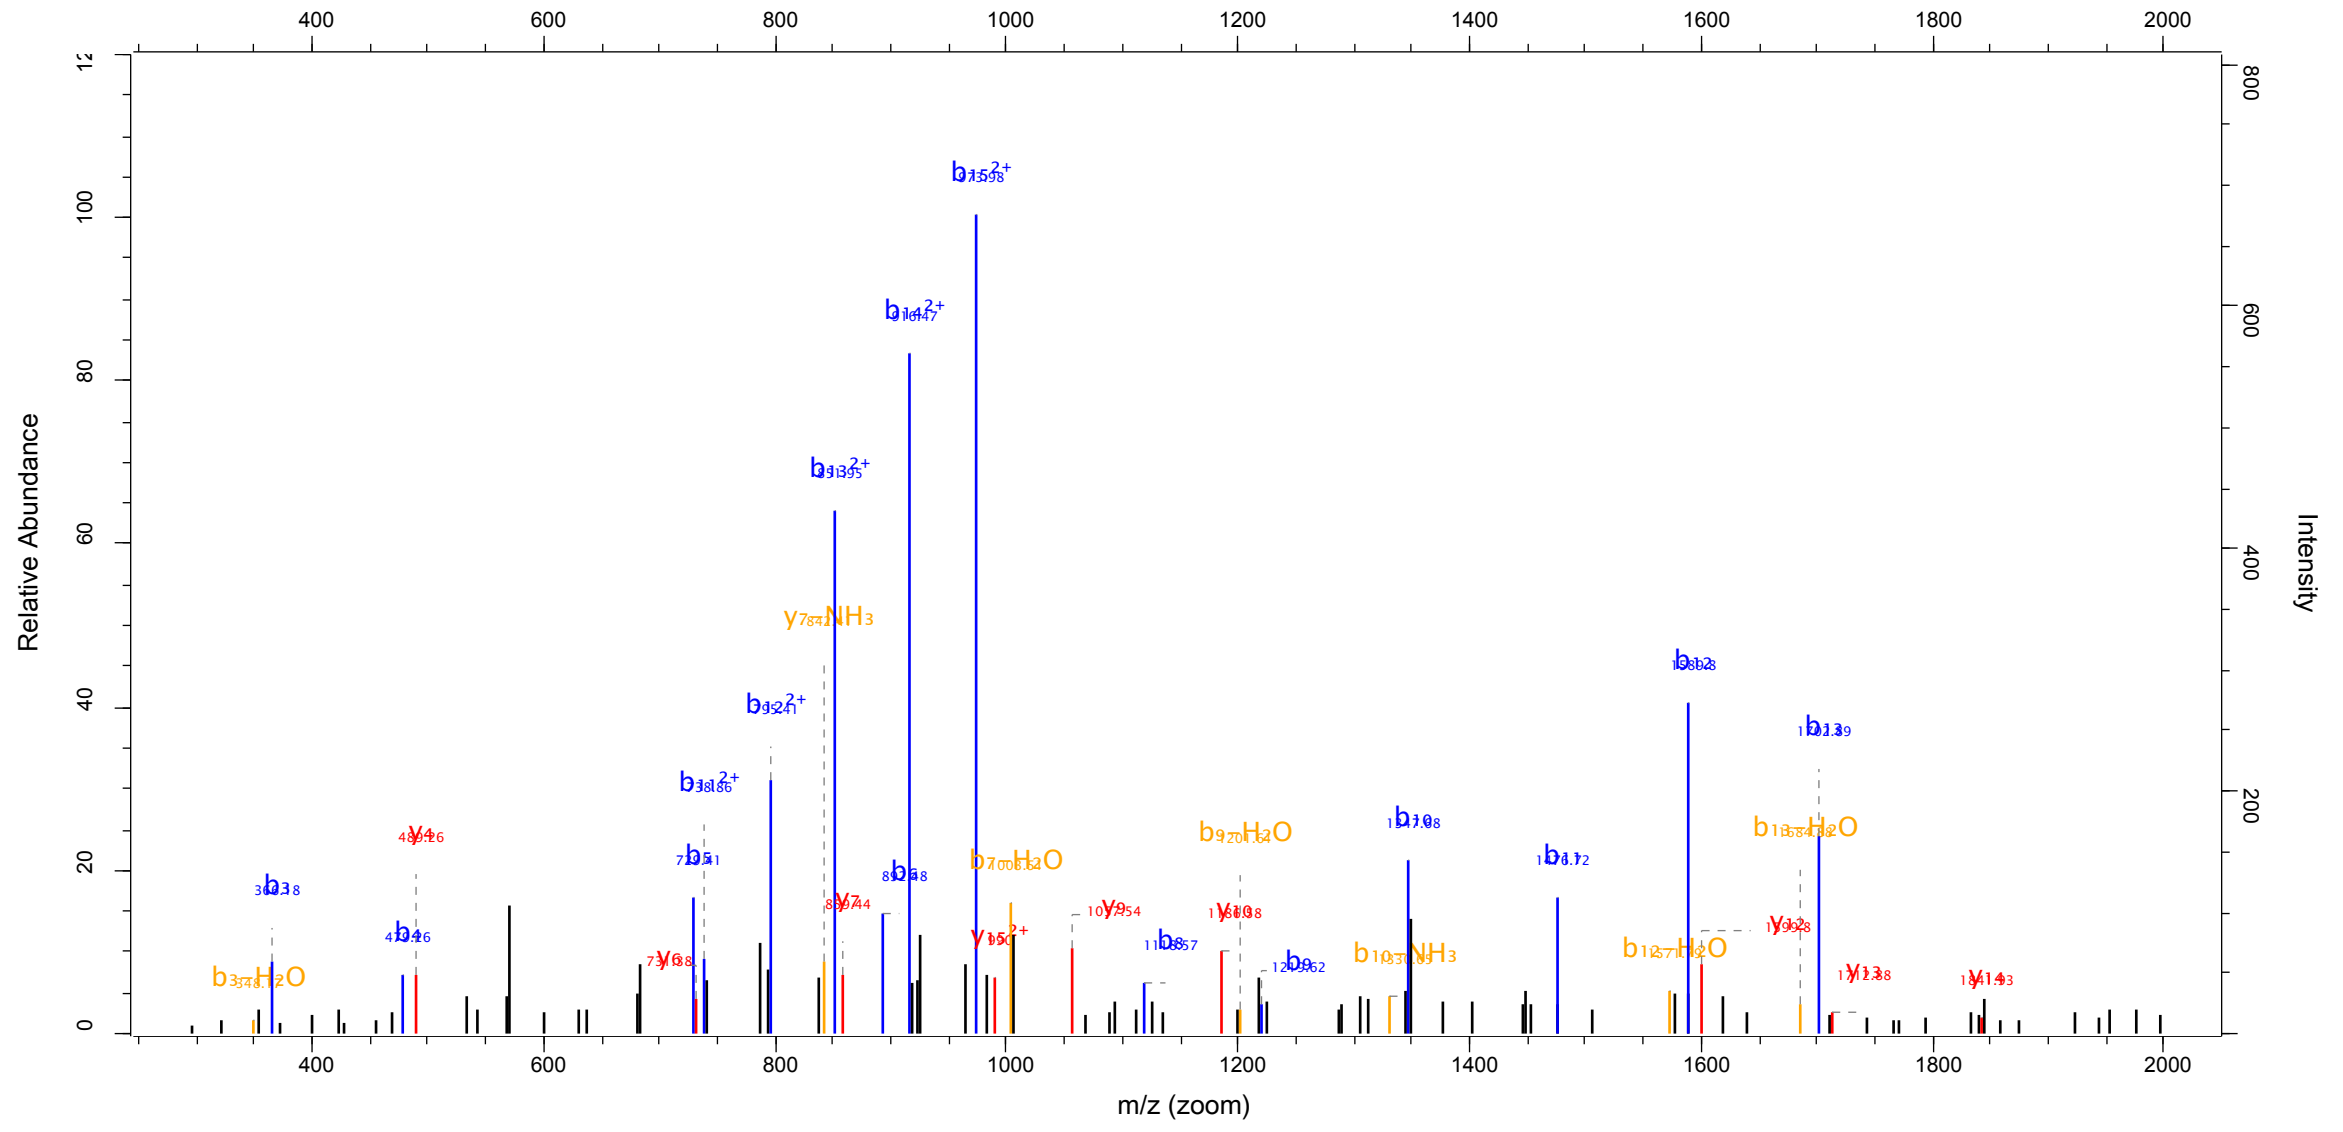

Scan number 19550 Raw file nak\_UBX6SAX6L\_14jan11\_16  
 Method ITMS; CID Pepti... 165.45

GlyGly Site Id 19

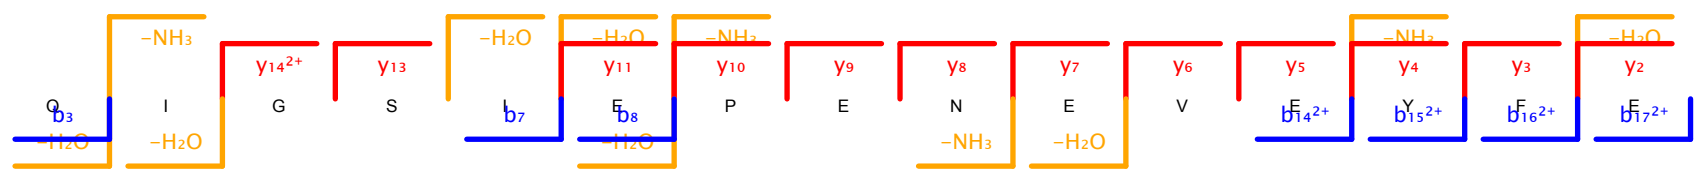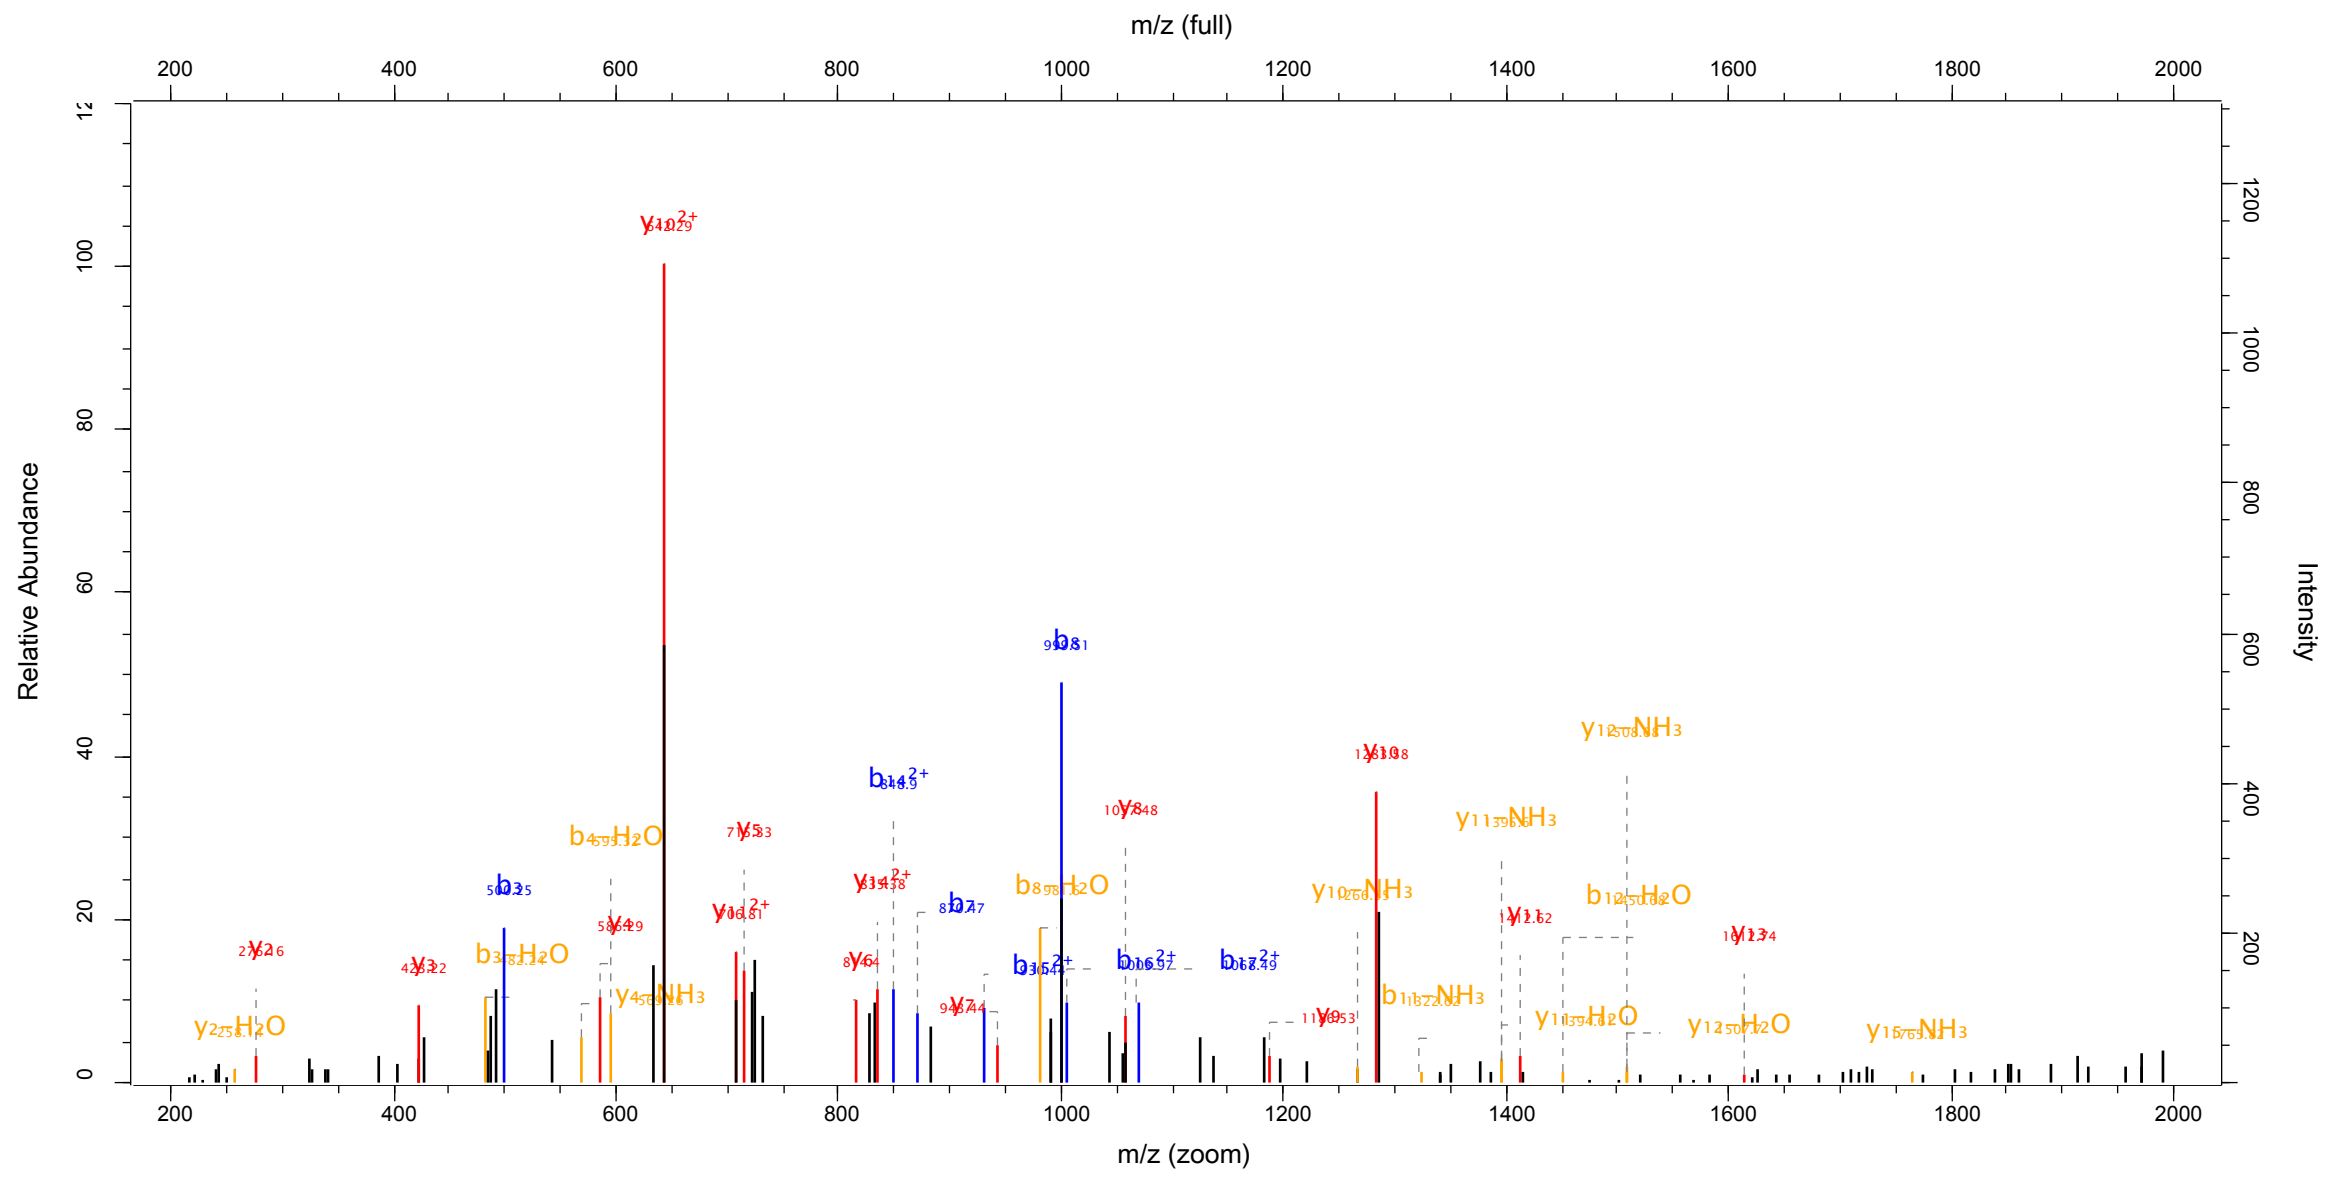

Scan number 19544 Raw file nak\_WTonetooneSAX5\_4feb11\_05  
 Method ITMS; CID Pepti... 159.18

GlyGly Site Id 20

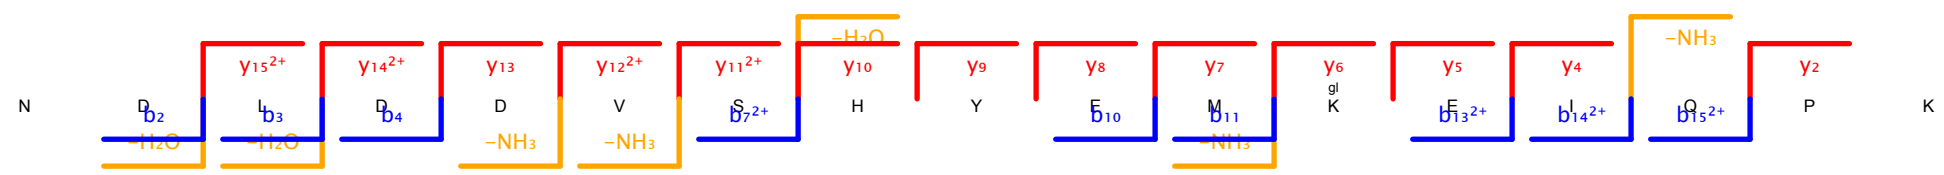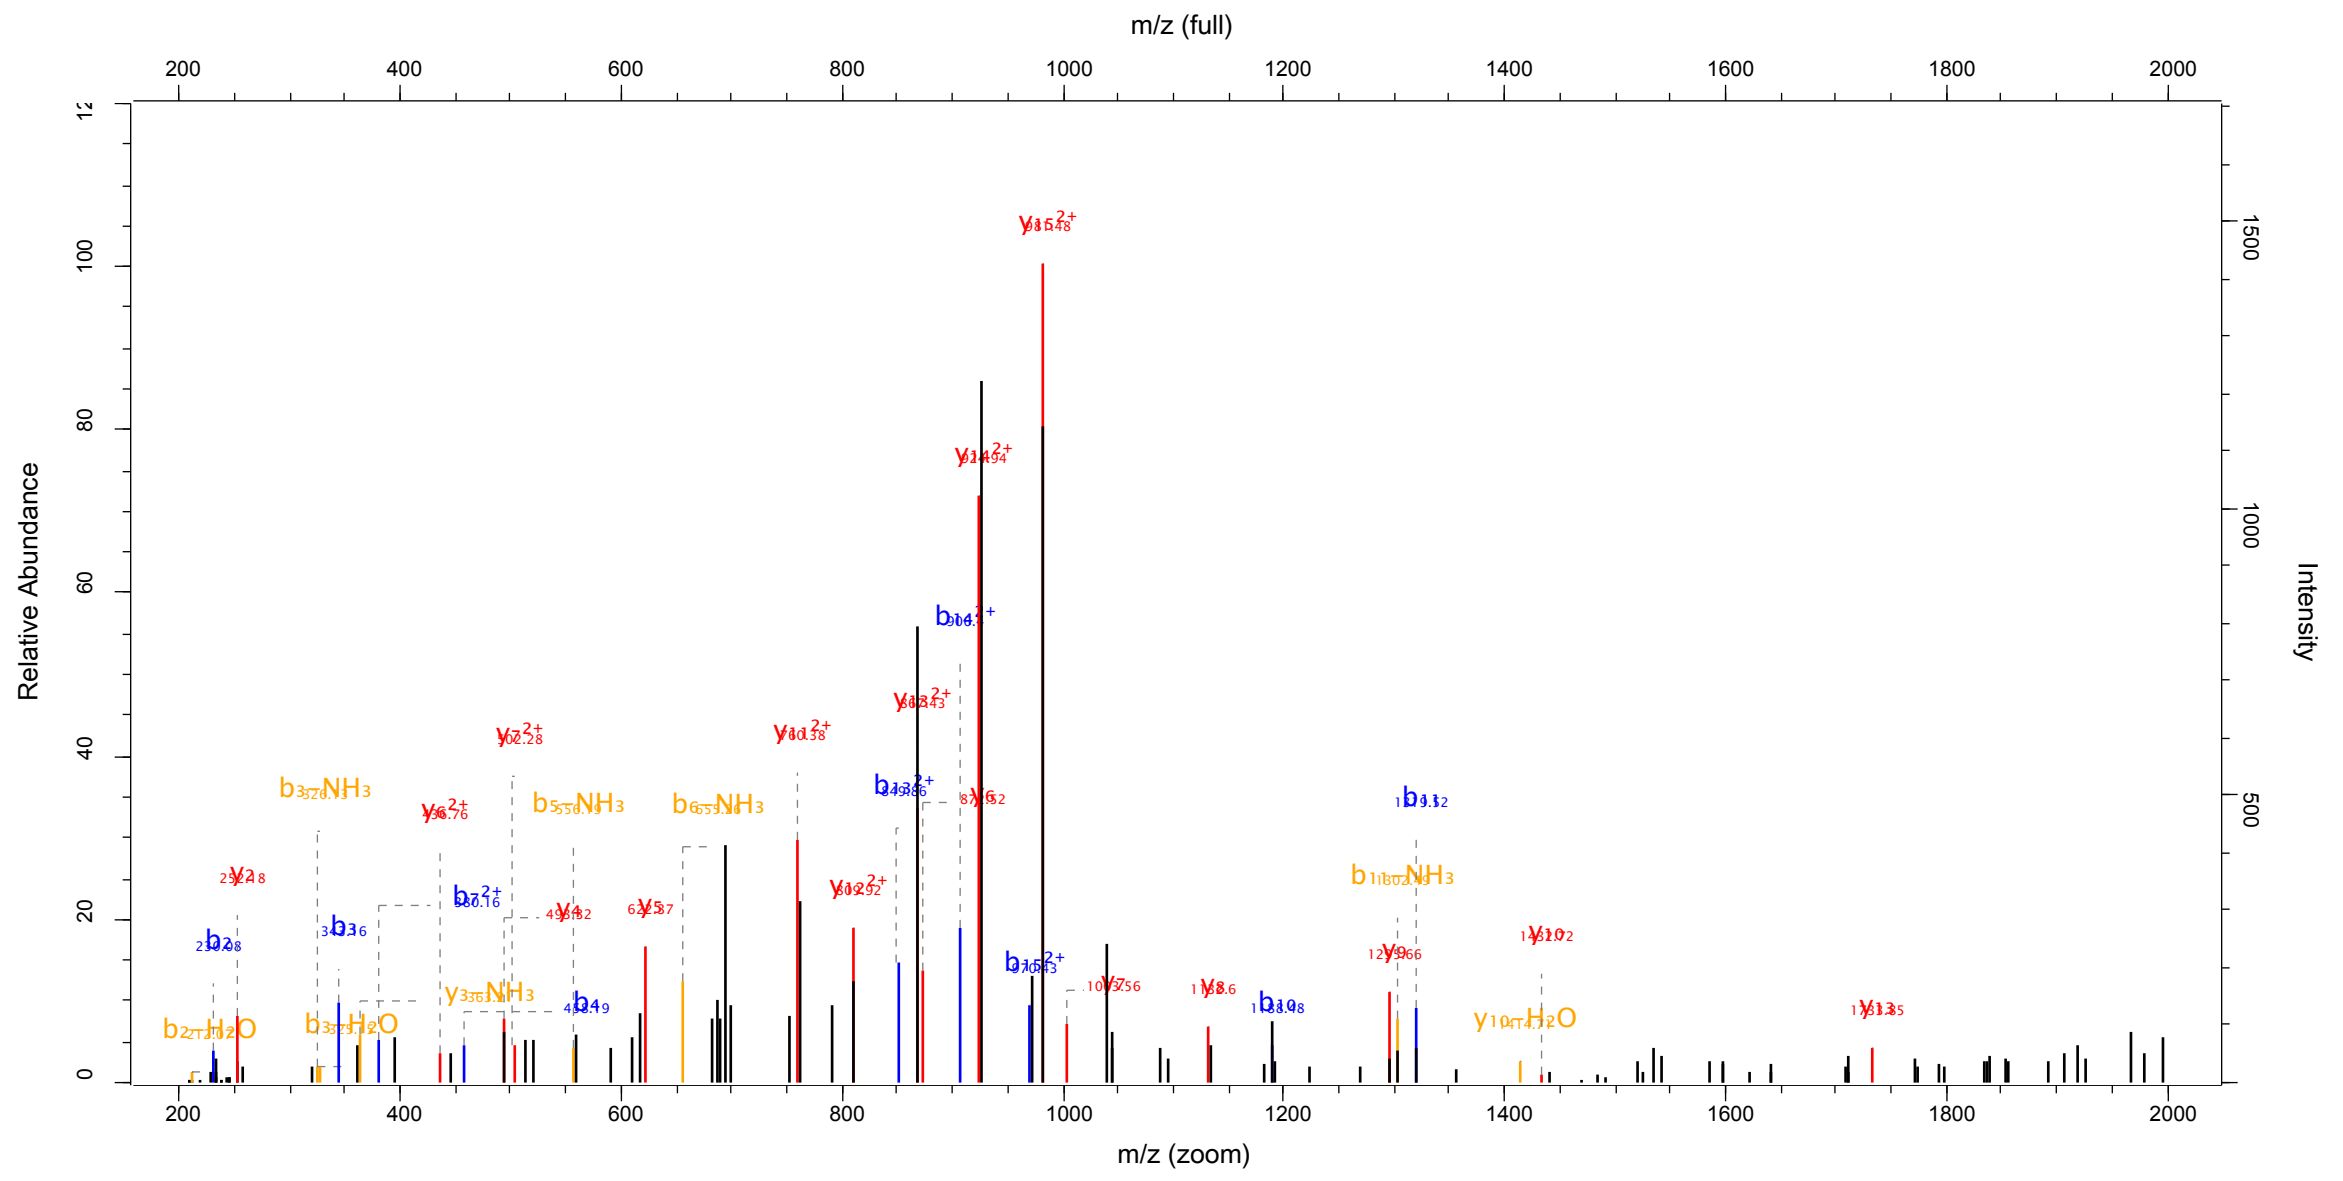

Scan number 25322 Raw file nak\_UBX2HSAX5\_8feb11\_09  
 Method ITMS; CID Pepti... 114.96

GlyGly Site Id 21

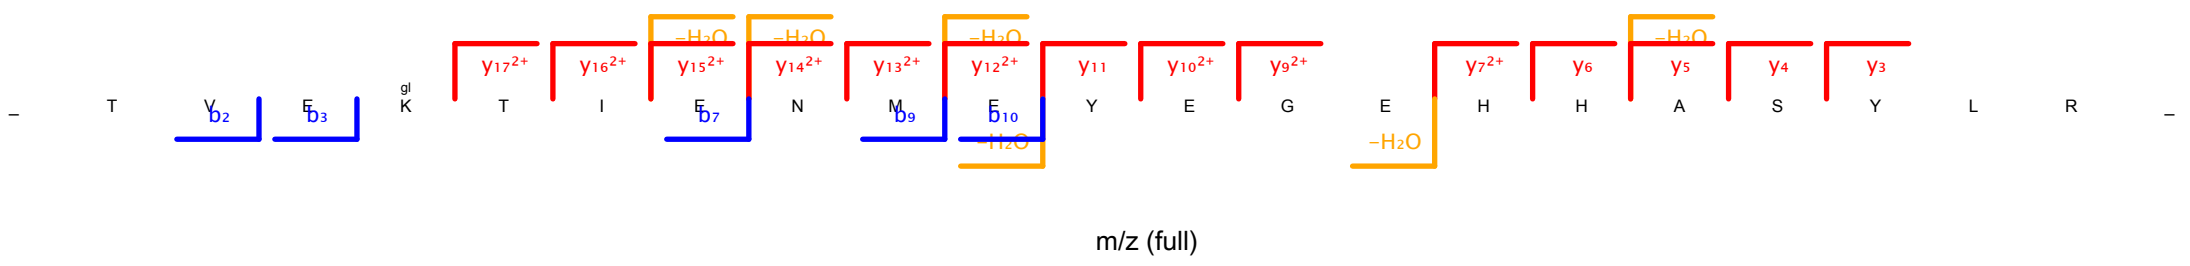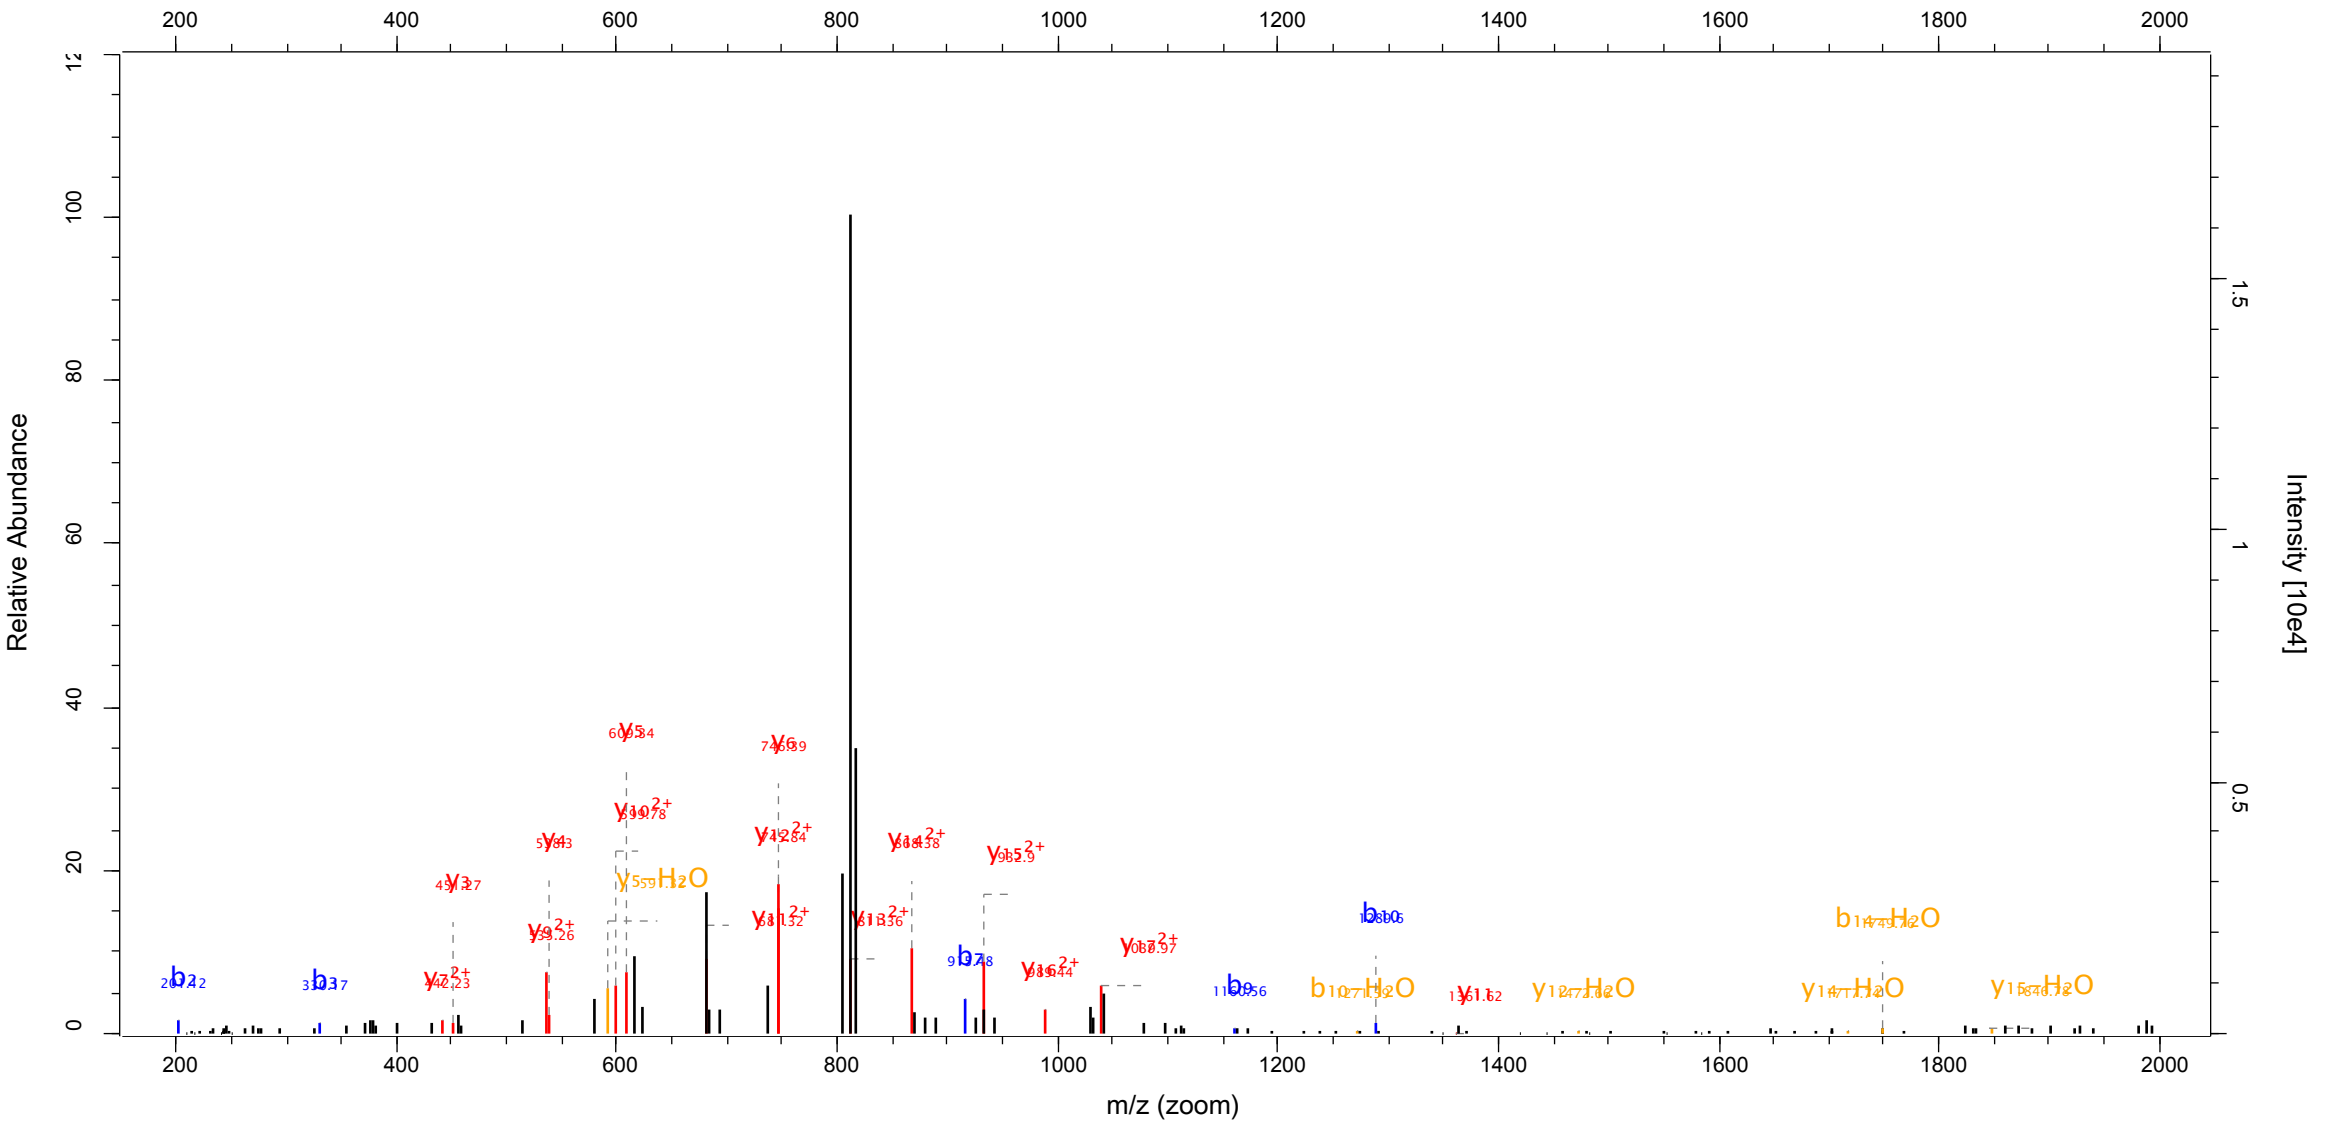

Scan number 34374 Raw file nak\_UBX6SAX1L\_14Jan11\_11  
 Method ITMS; CID Pepti... 153.94

GlyGly Site Id 22

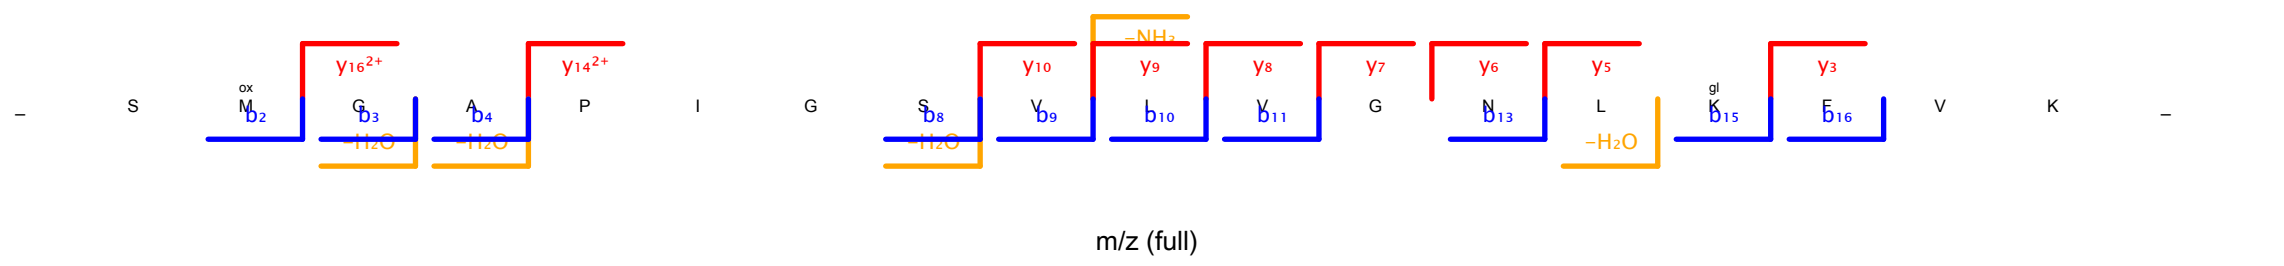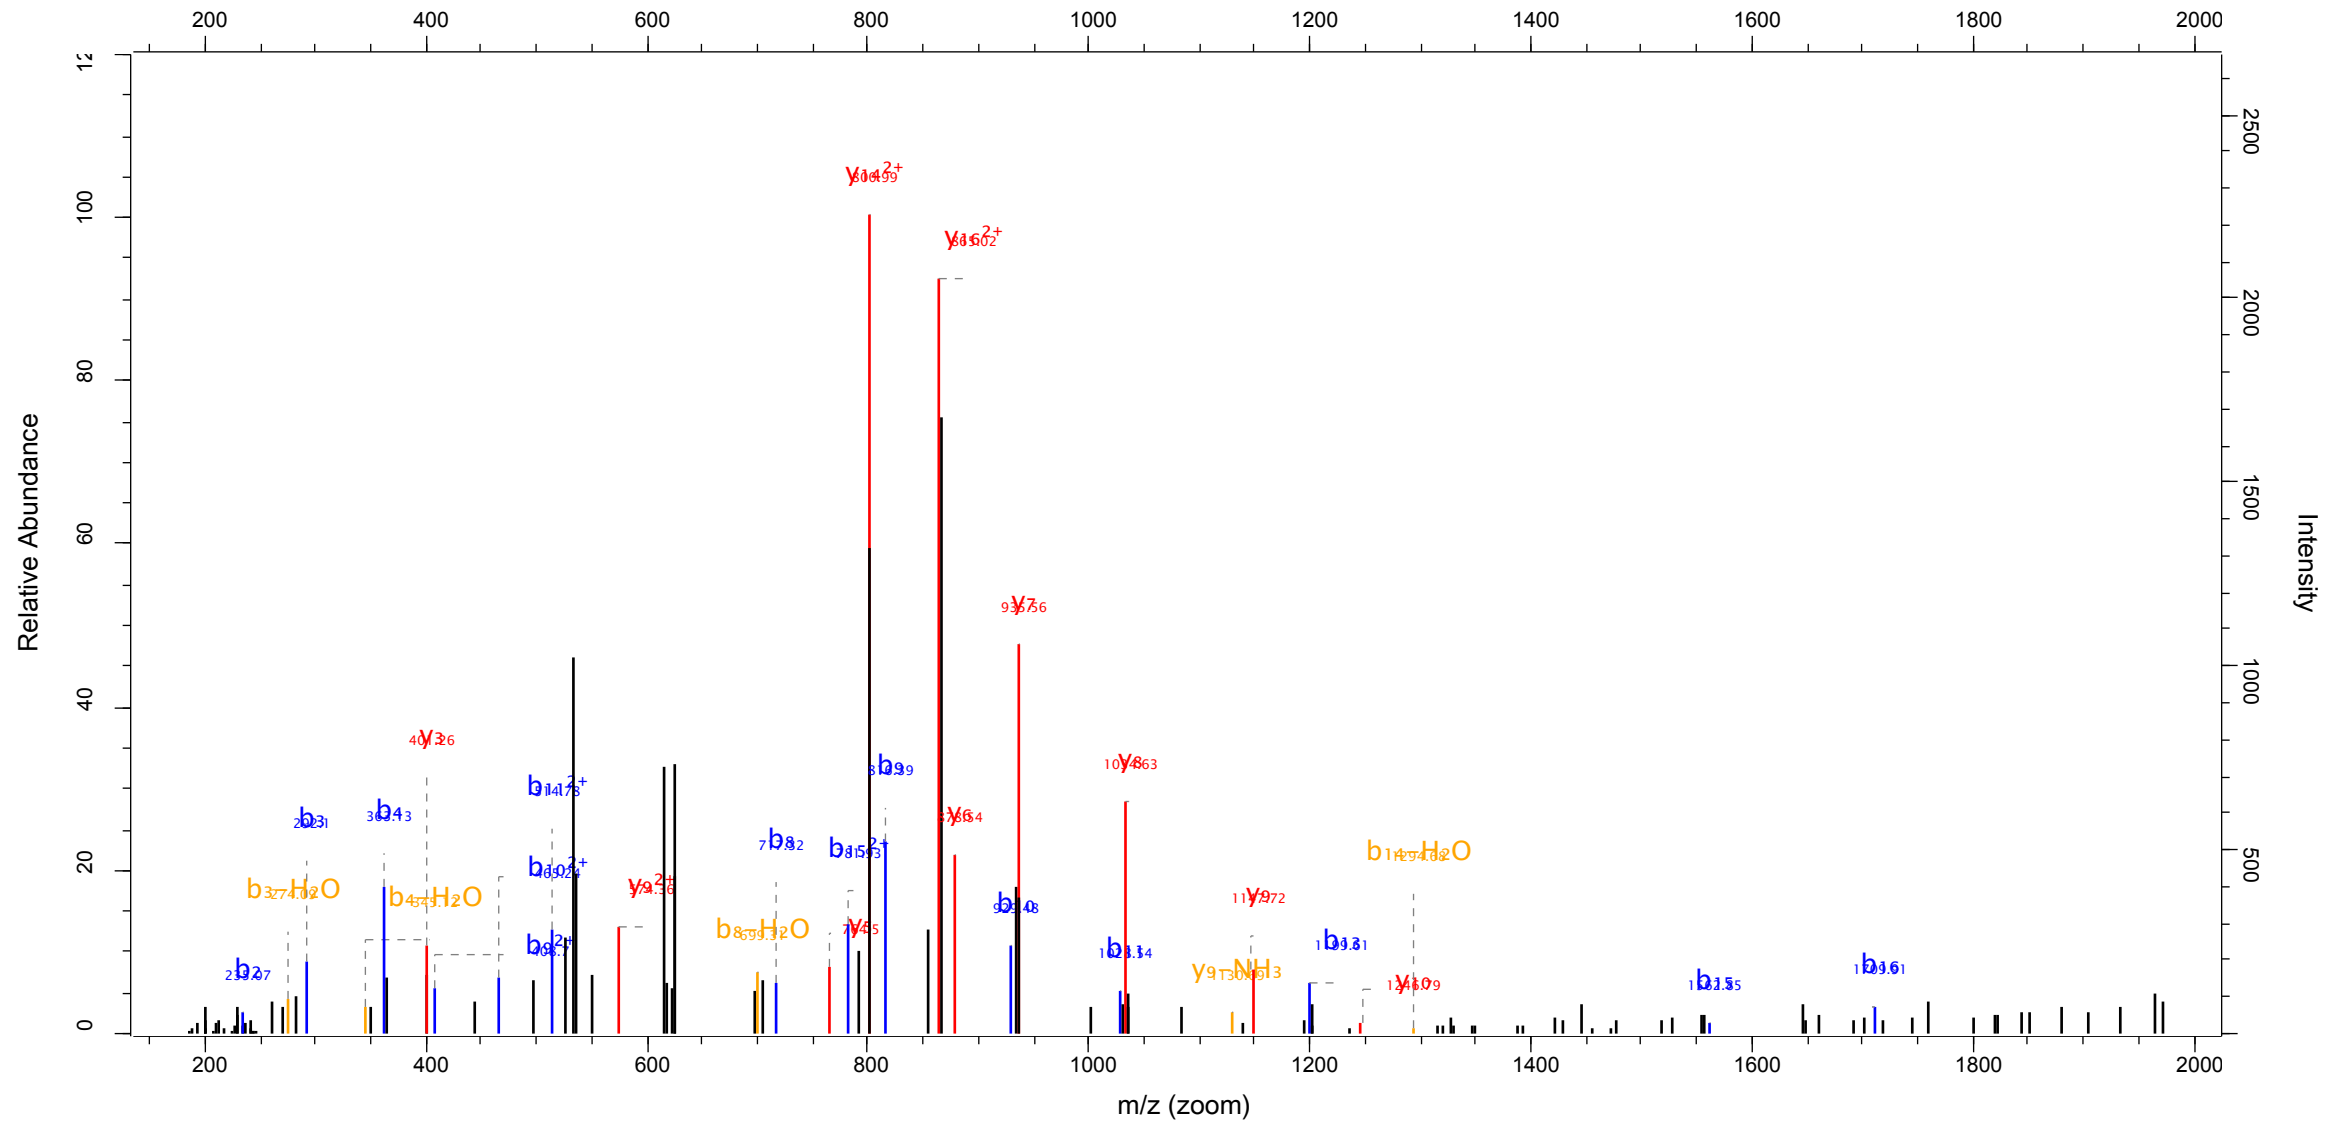

Scan number 37749 Raw file nak\_UBX6SAX1H\_14Jan11\_11  
 Method ITMS; CID Pepti... 126.48

GlyGly Site Id 23

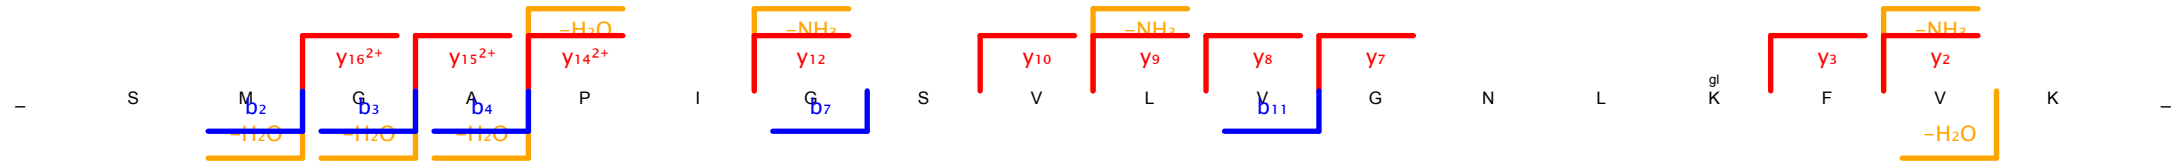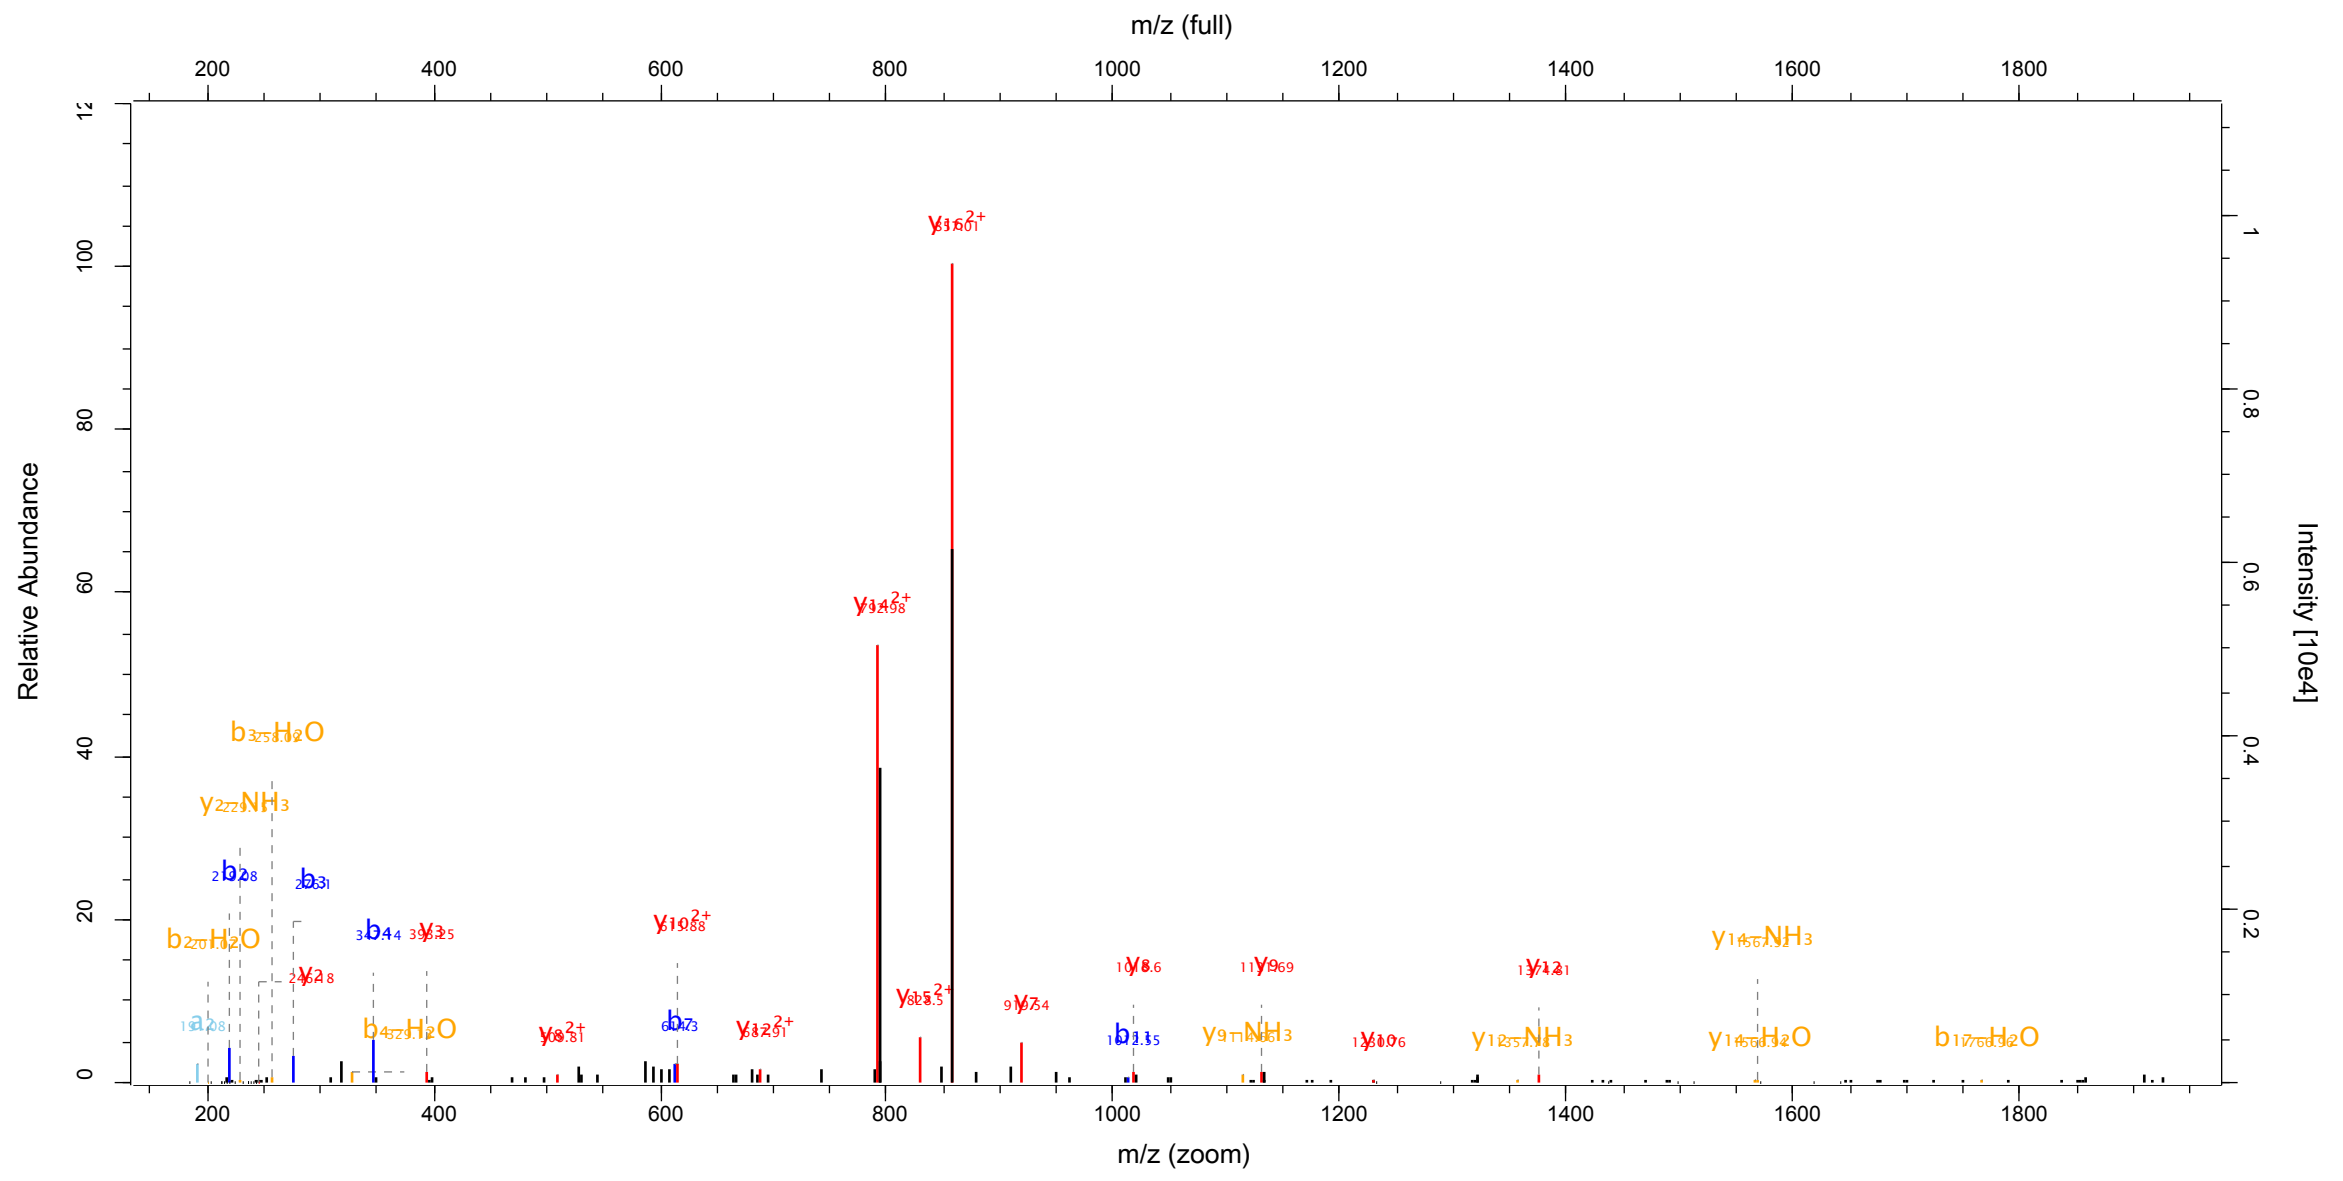



Scan number 7604 Raw file nak\_UBX2LSAX6\_8feb11\_06  
 Method ITMS; CID Pepti... 136.93

GlyGly Site Id 24

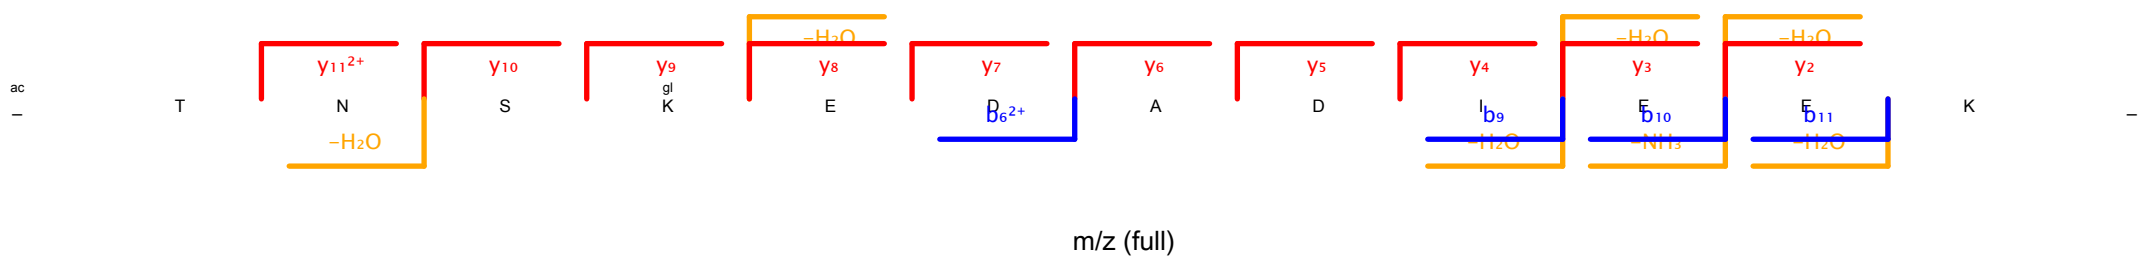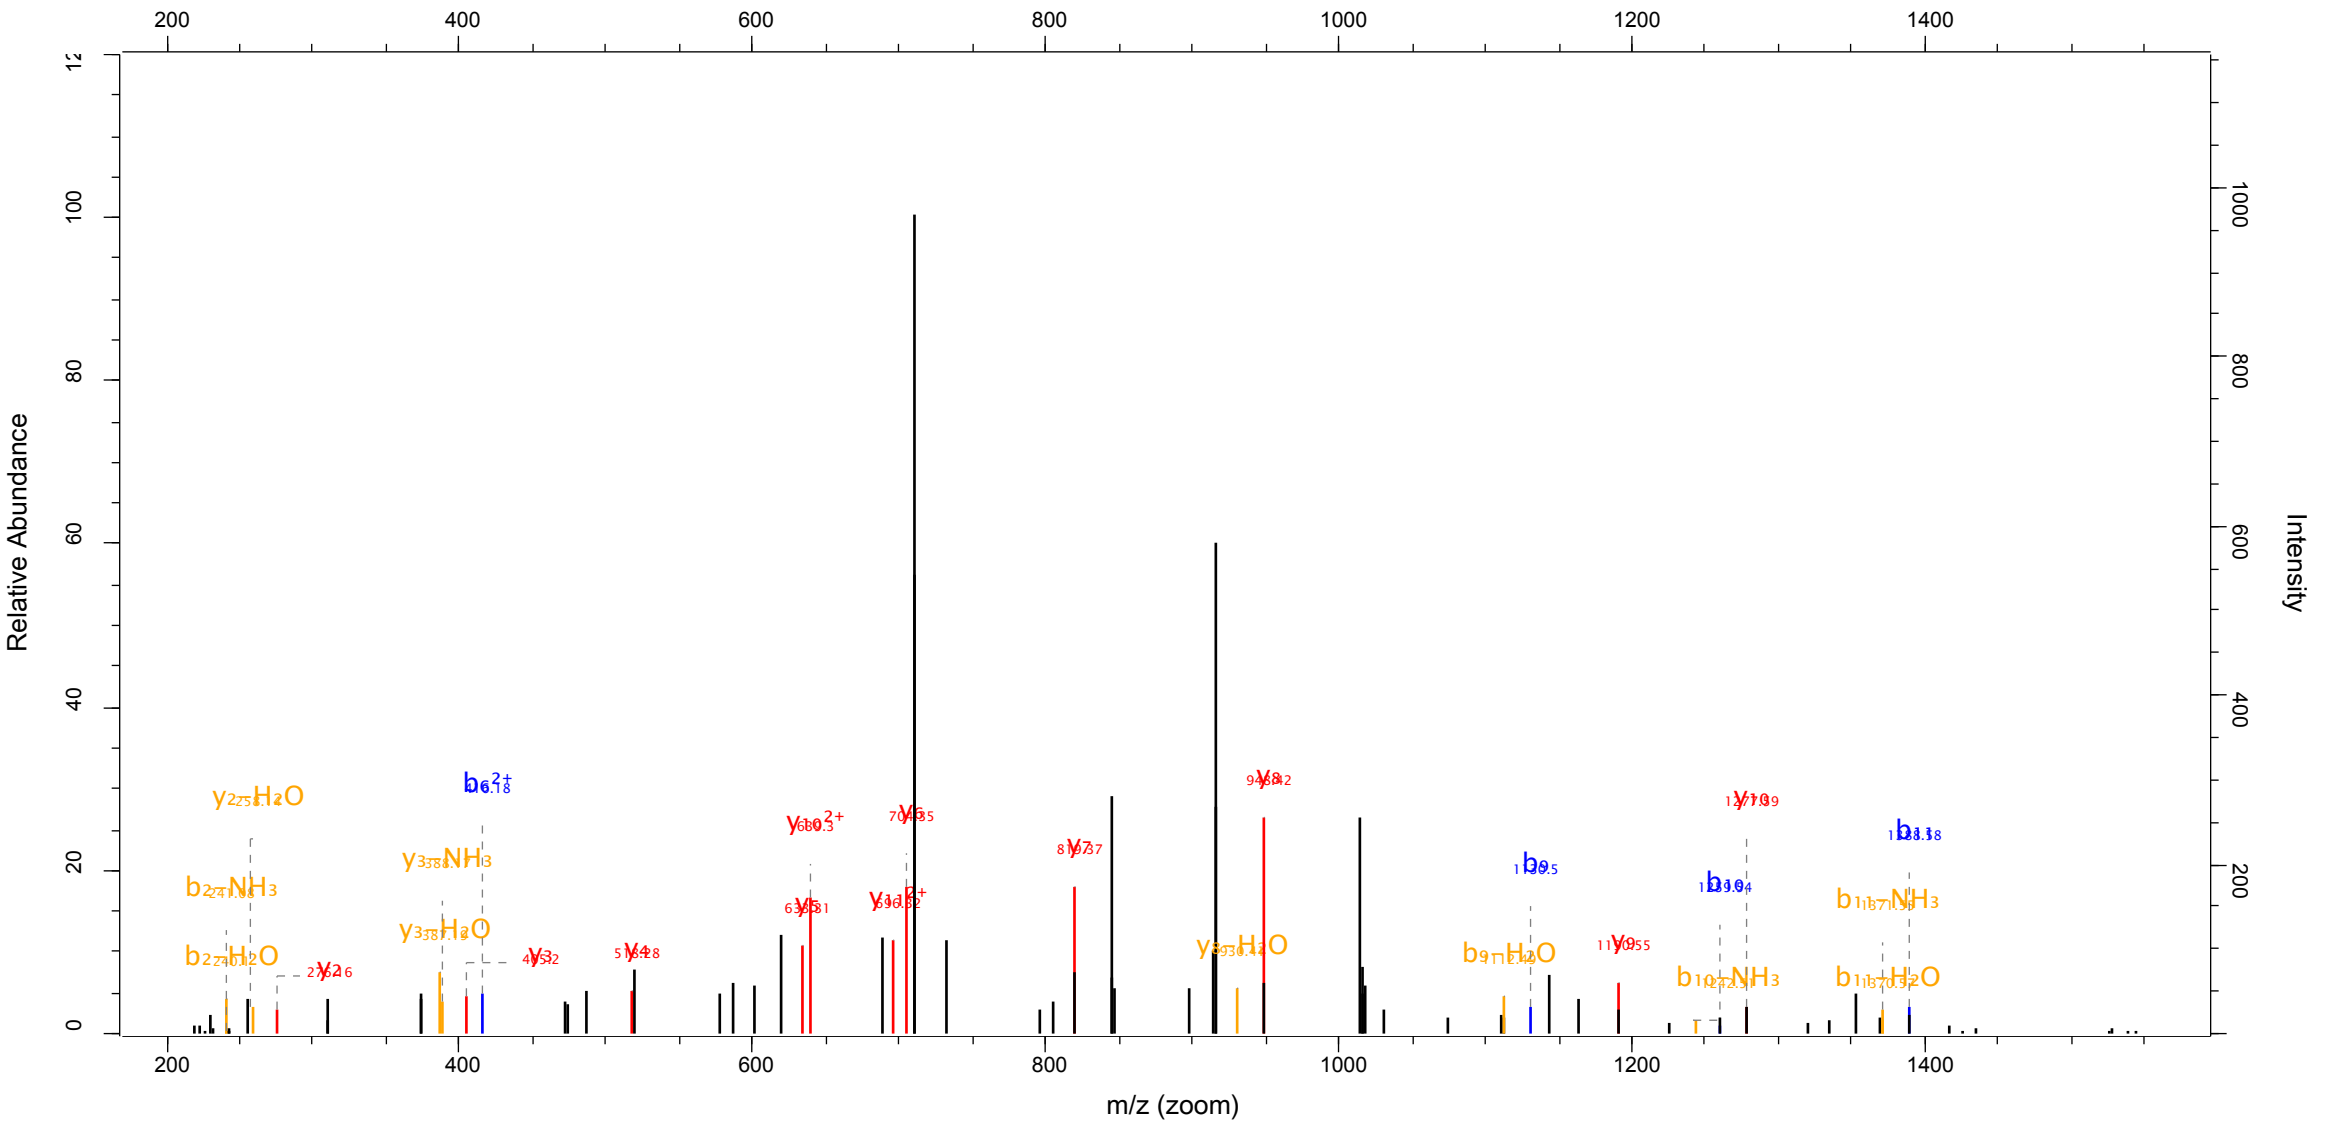

Scan number 25322 Raw file nak\_UBX2LSAX6\_8feb11\_06  
 Method ITMS; CID Pepti... 242.91

GlyGly Site Id 25

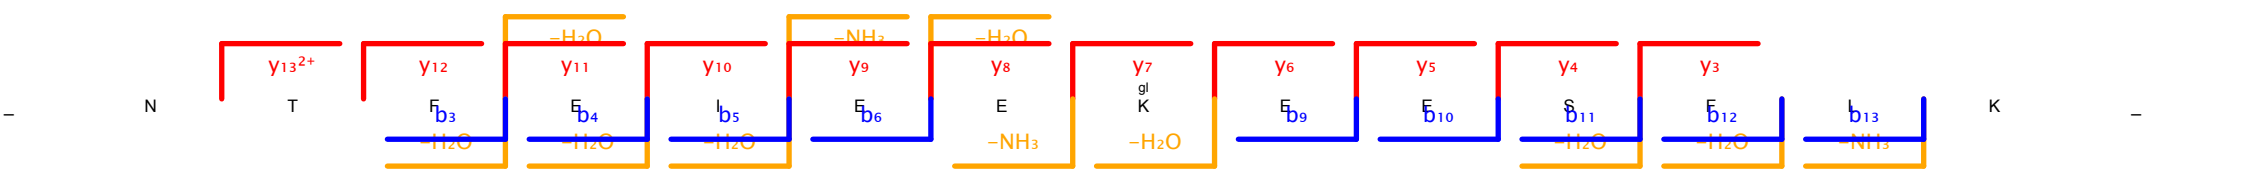

m/z (full)

400 600 800 1000 1200 1400 1600 1800

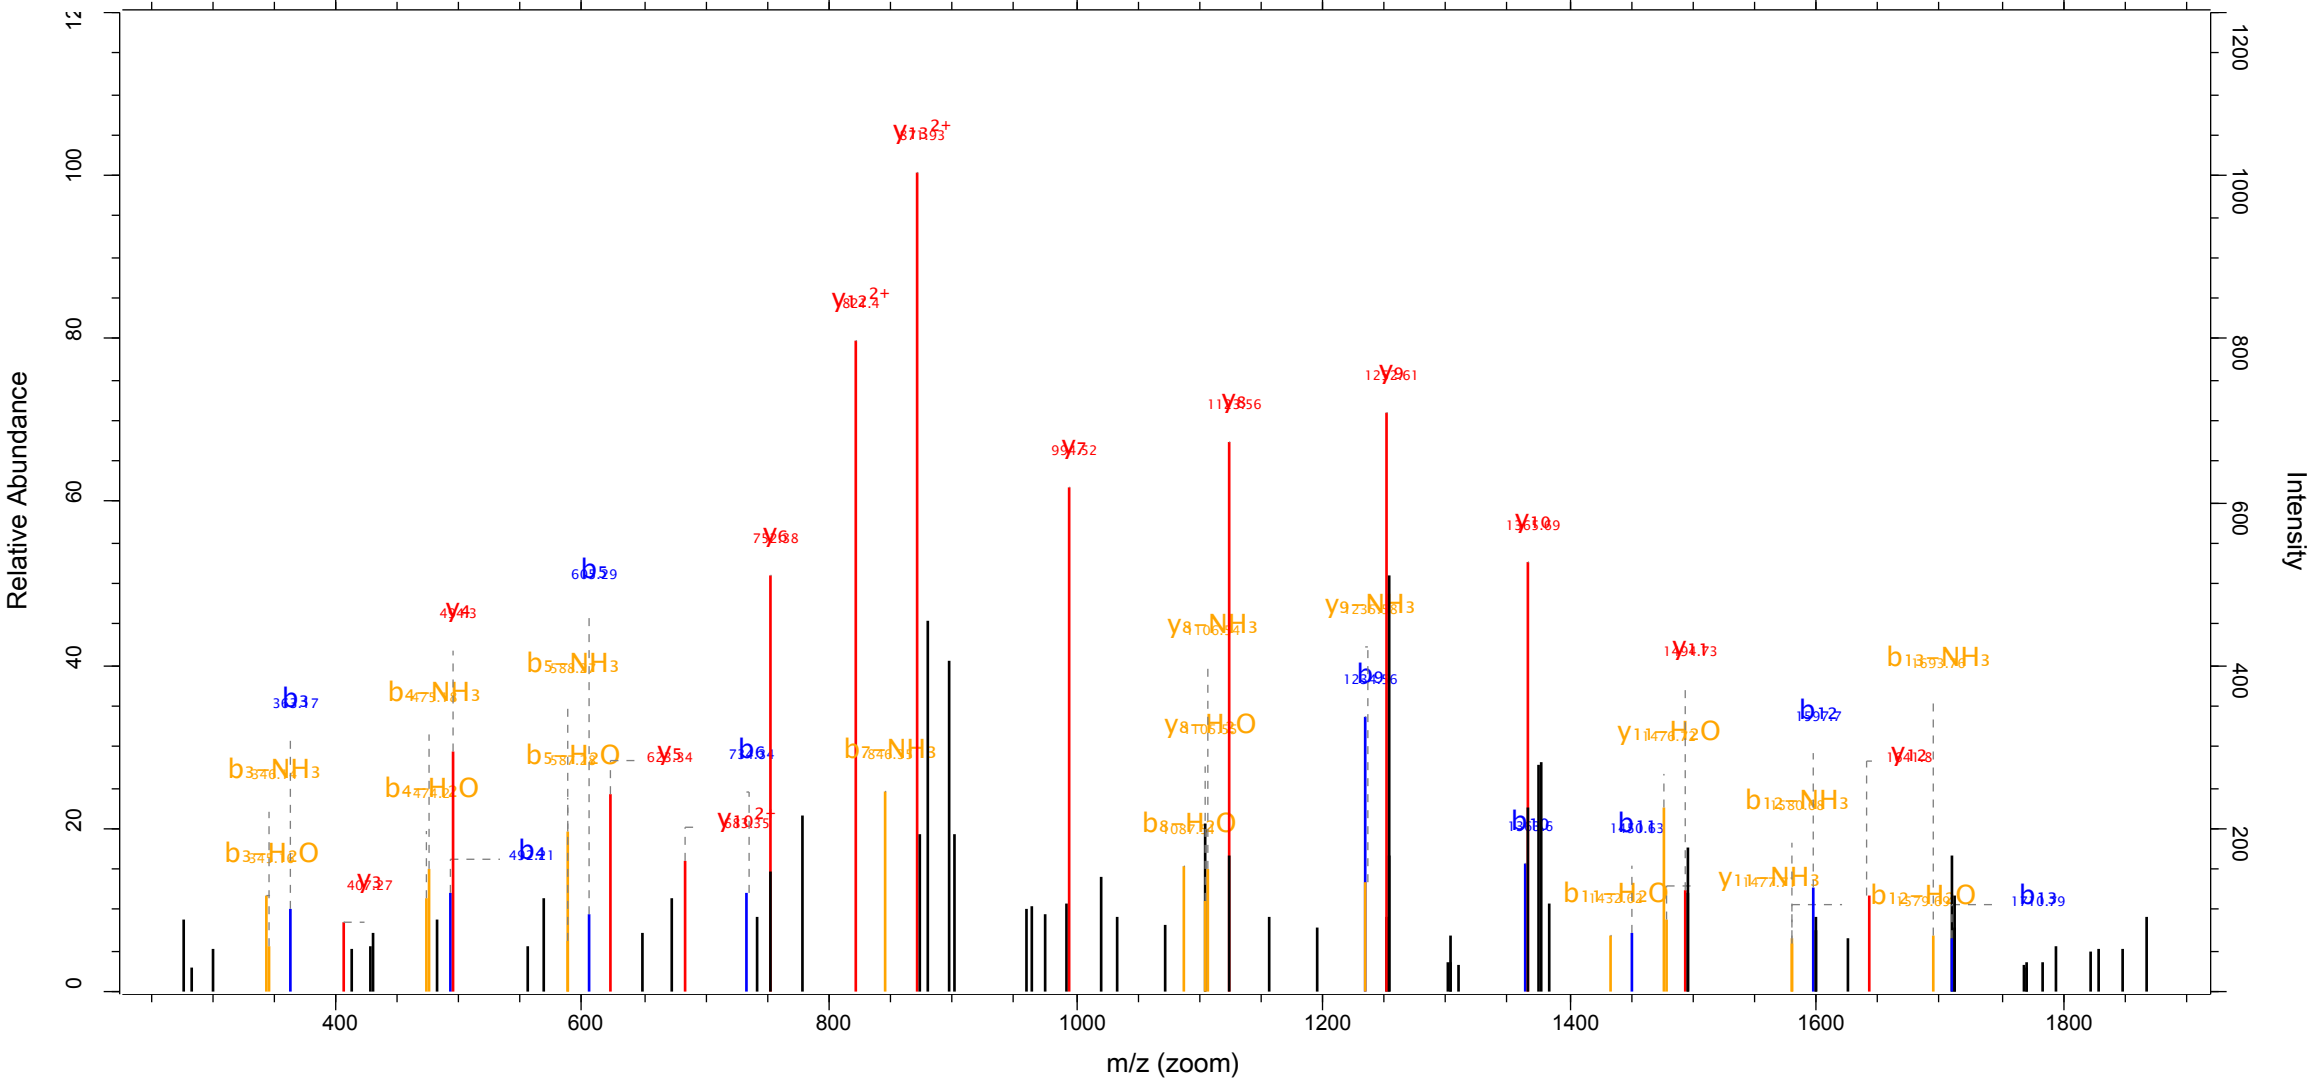

Scan number 16519 Raw file nak\_UBX7LSAX6\_20Jan11\_6  
 Method ITMS; CID Pepti... 173.36

GlyGly Site Id 26

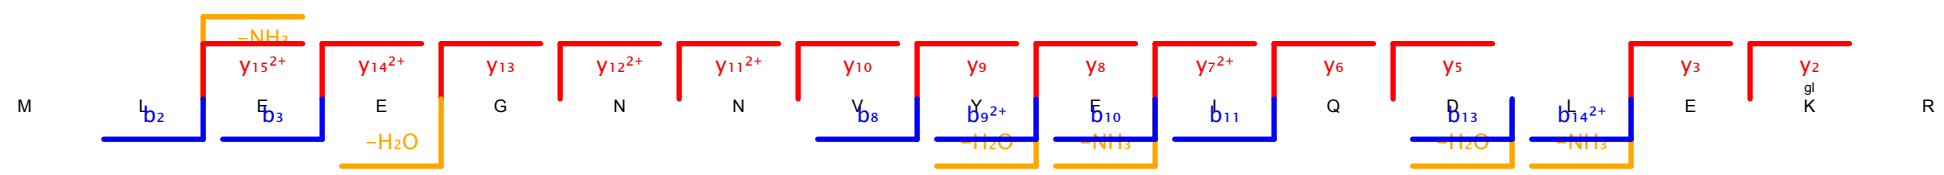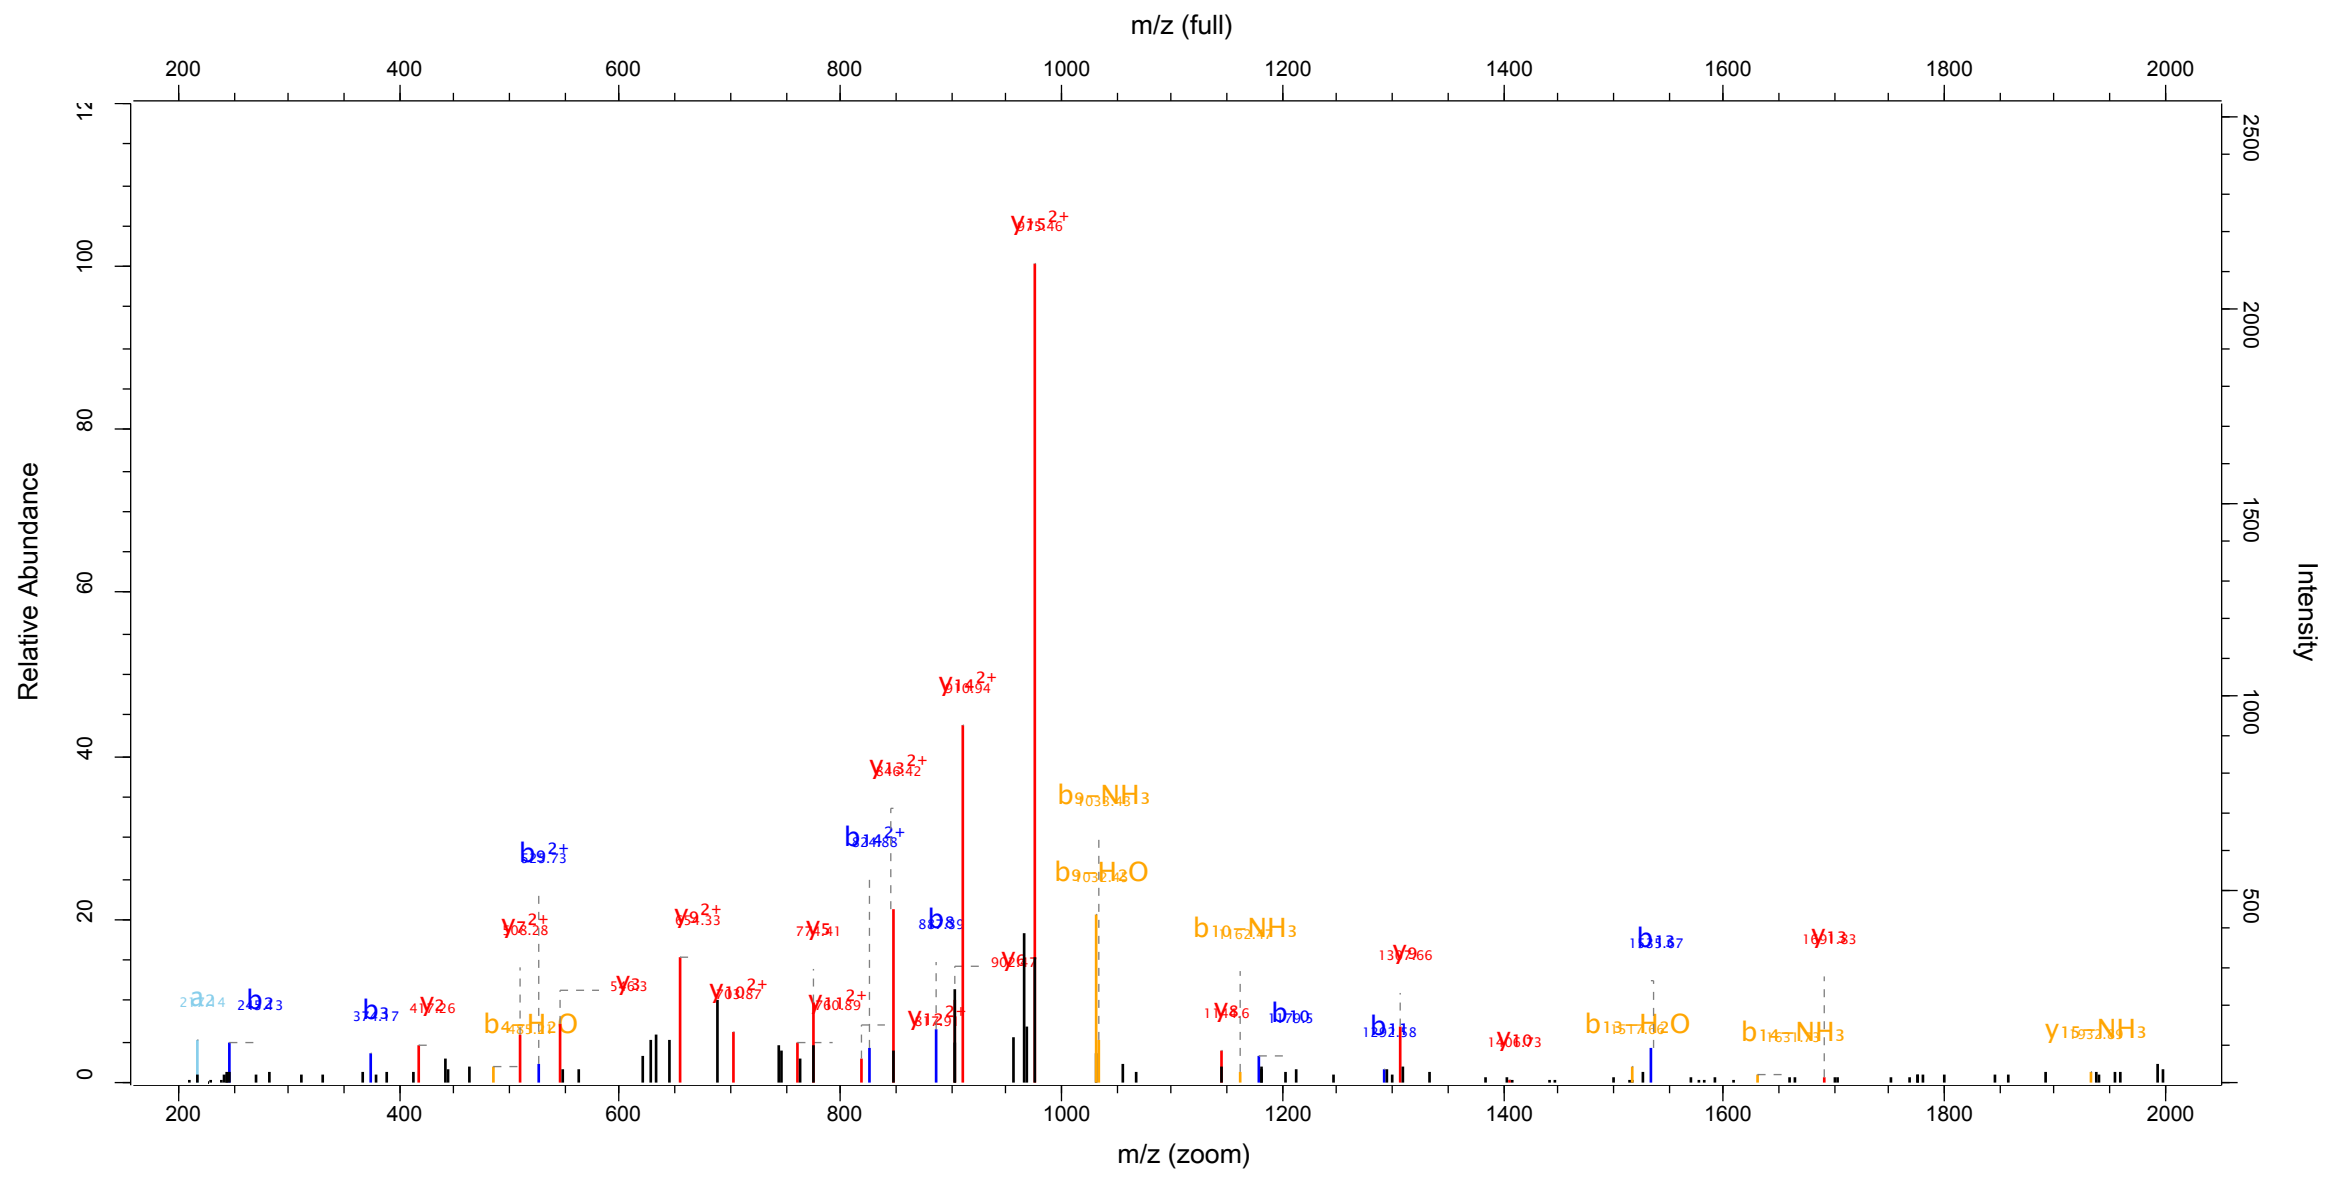

Scan number 17246 Raw file nak\_UBX3LSAX3\_28jan11\_21  
 Method ITMS; CID Pepti... 158.11

GlyGly Site Id 27

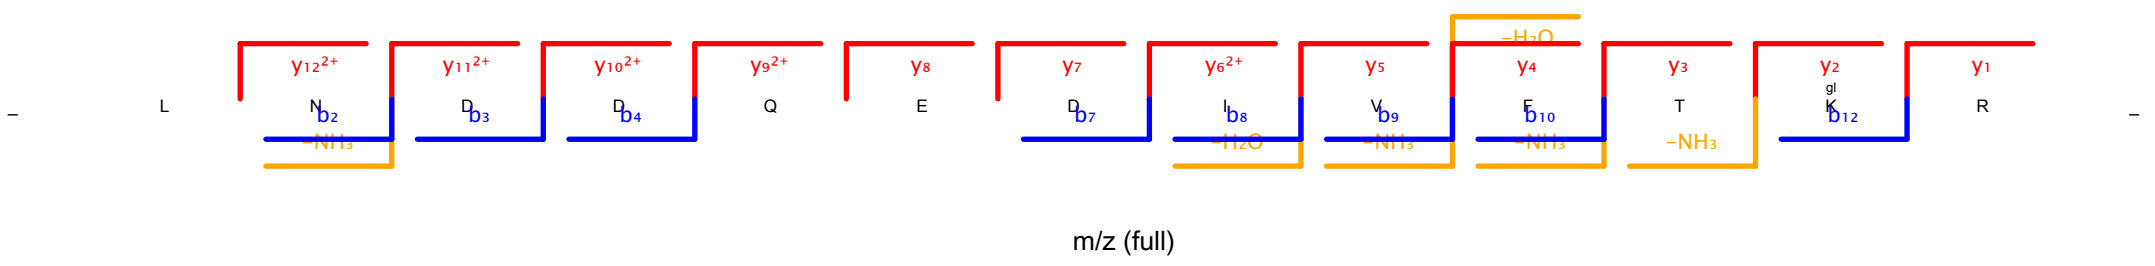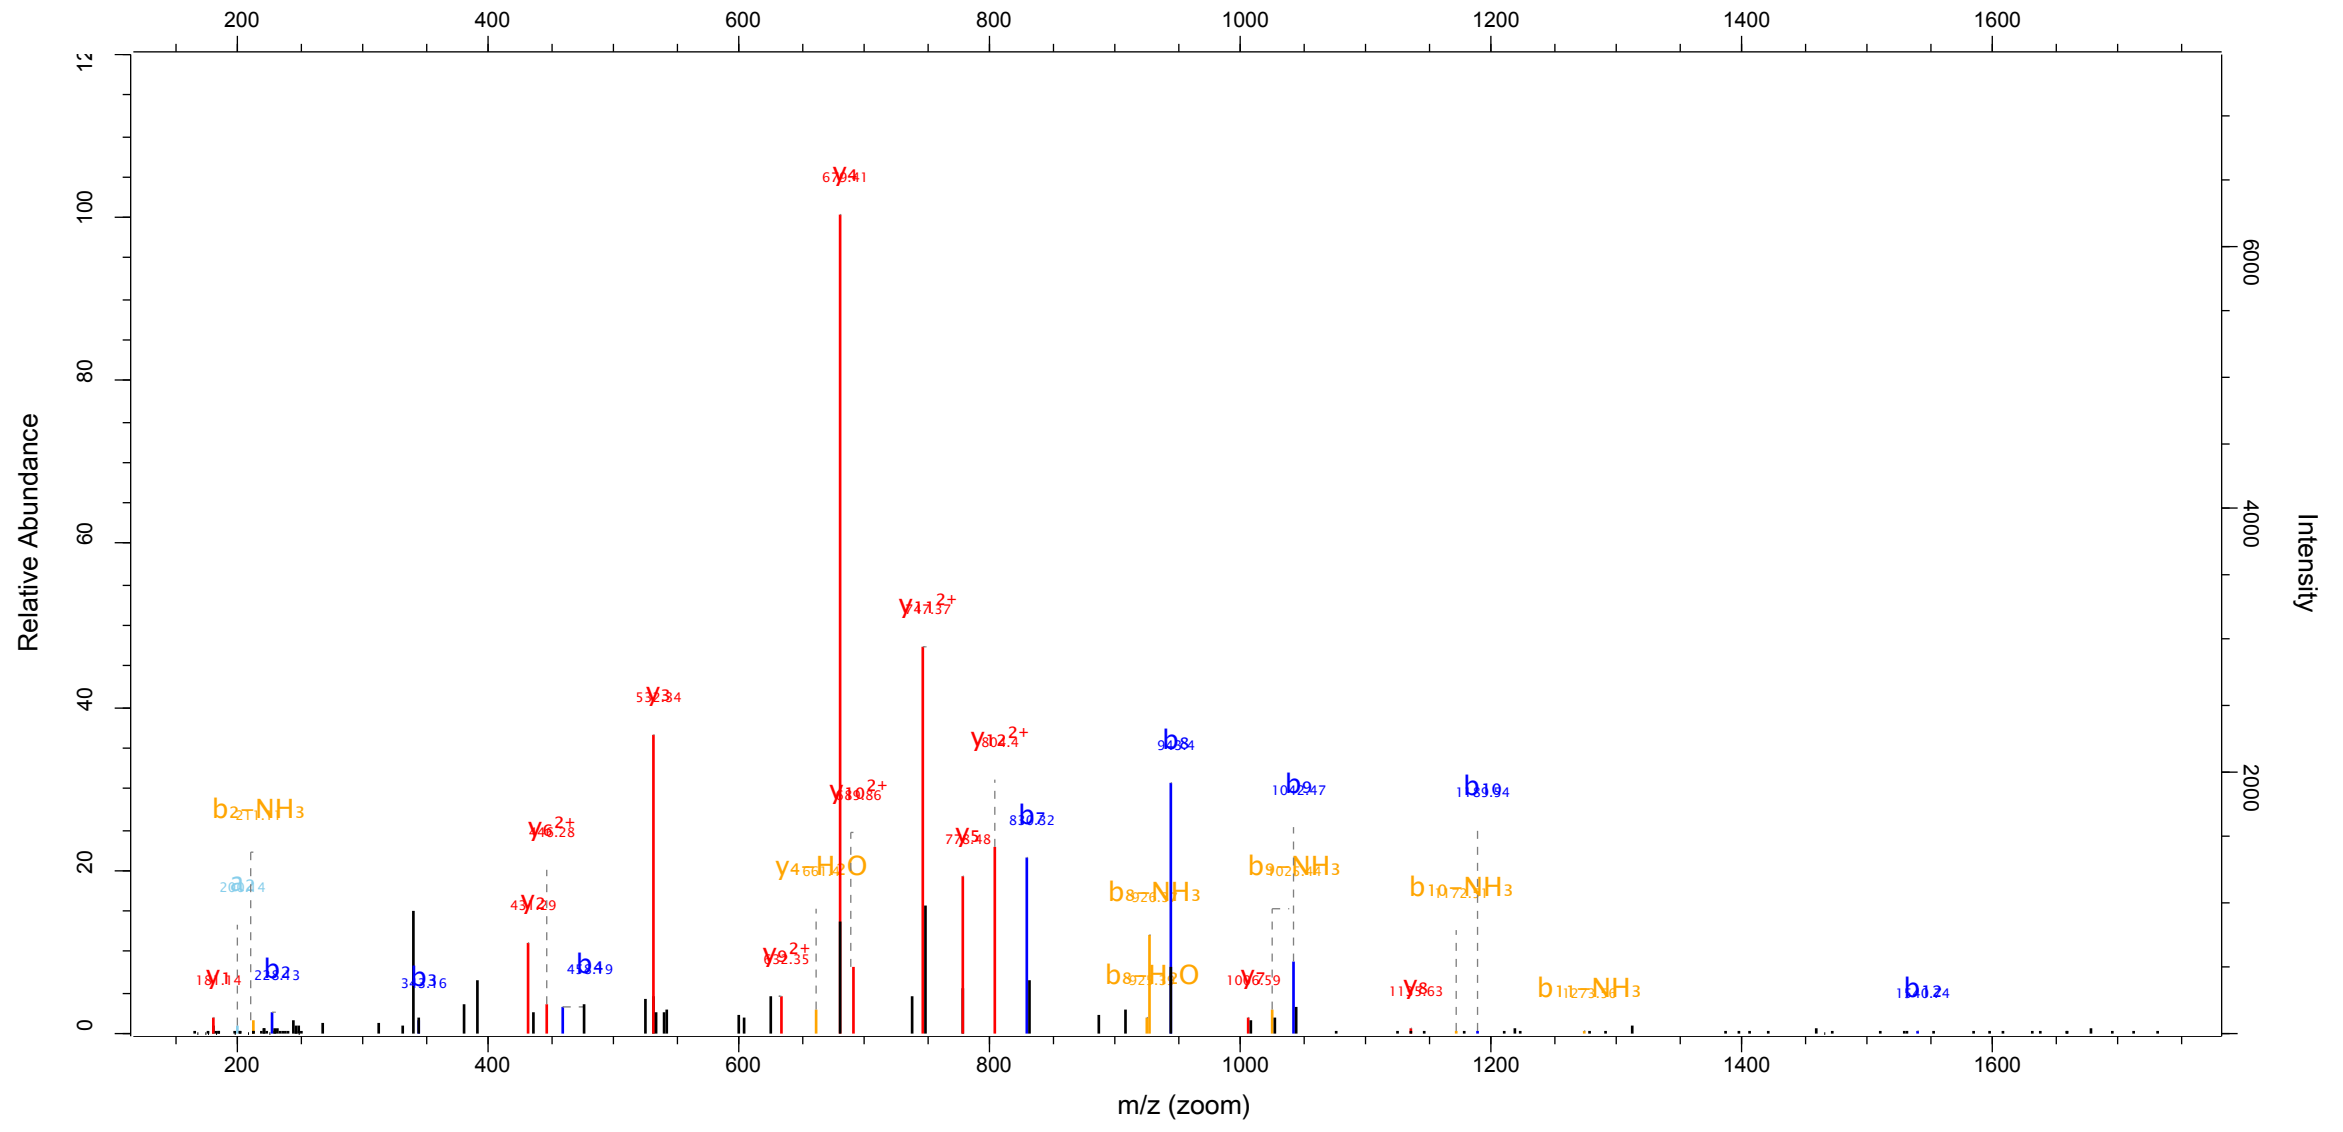

Scan number 28889 Raw file nak\_WTonetoonSAX2\_4feb11\_02  
 Method ITMS; CID Pepti... 73.45

GlyGly Site Id 28 & 29

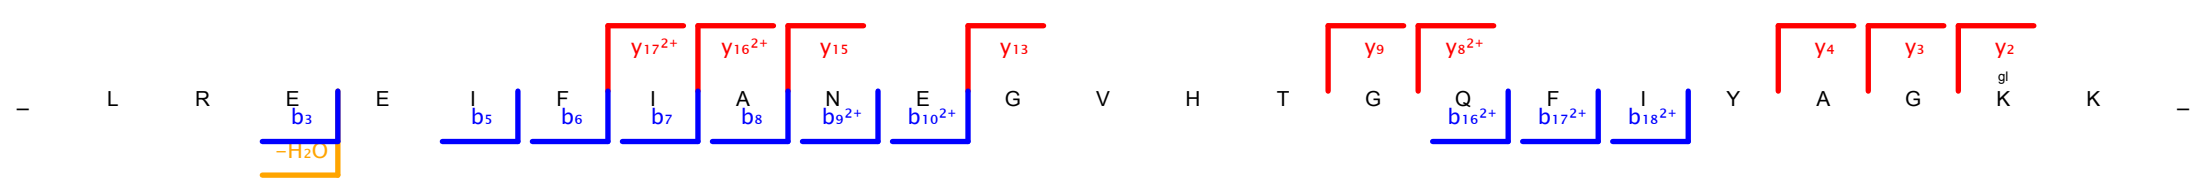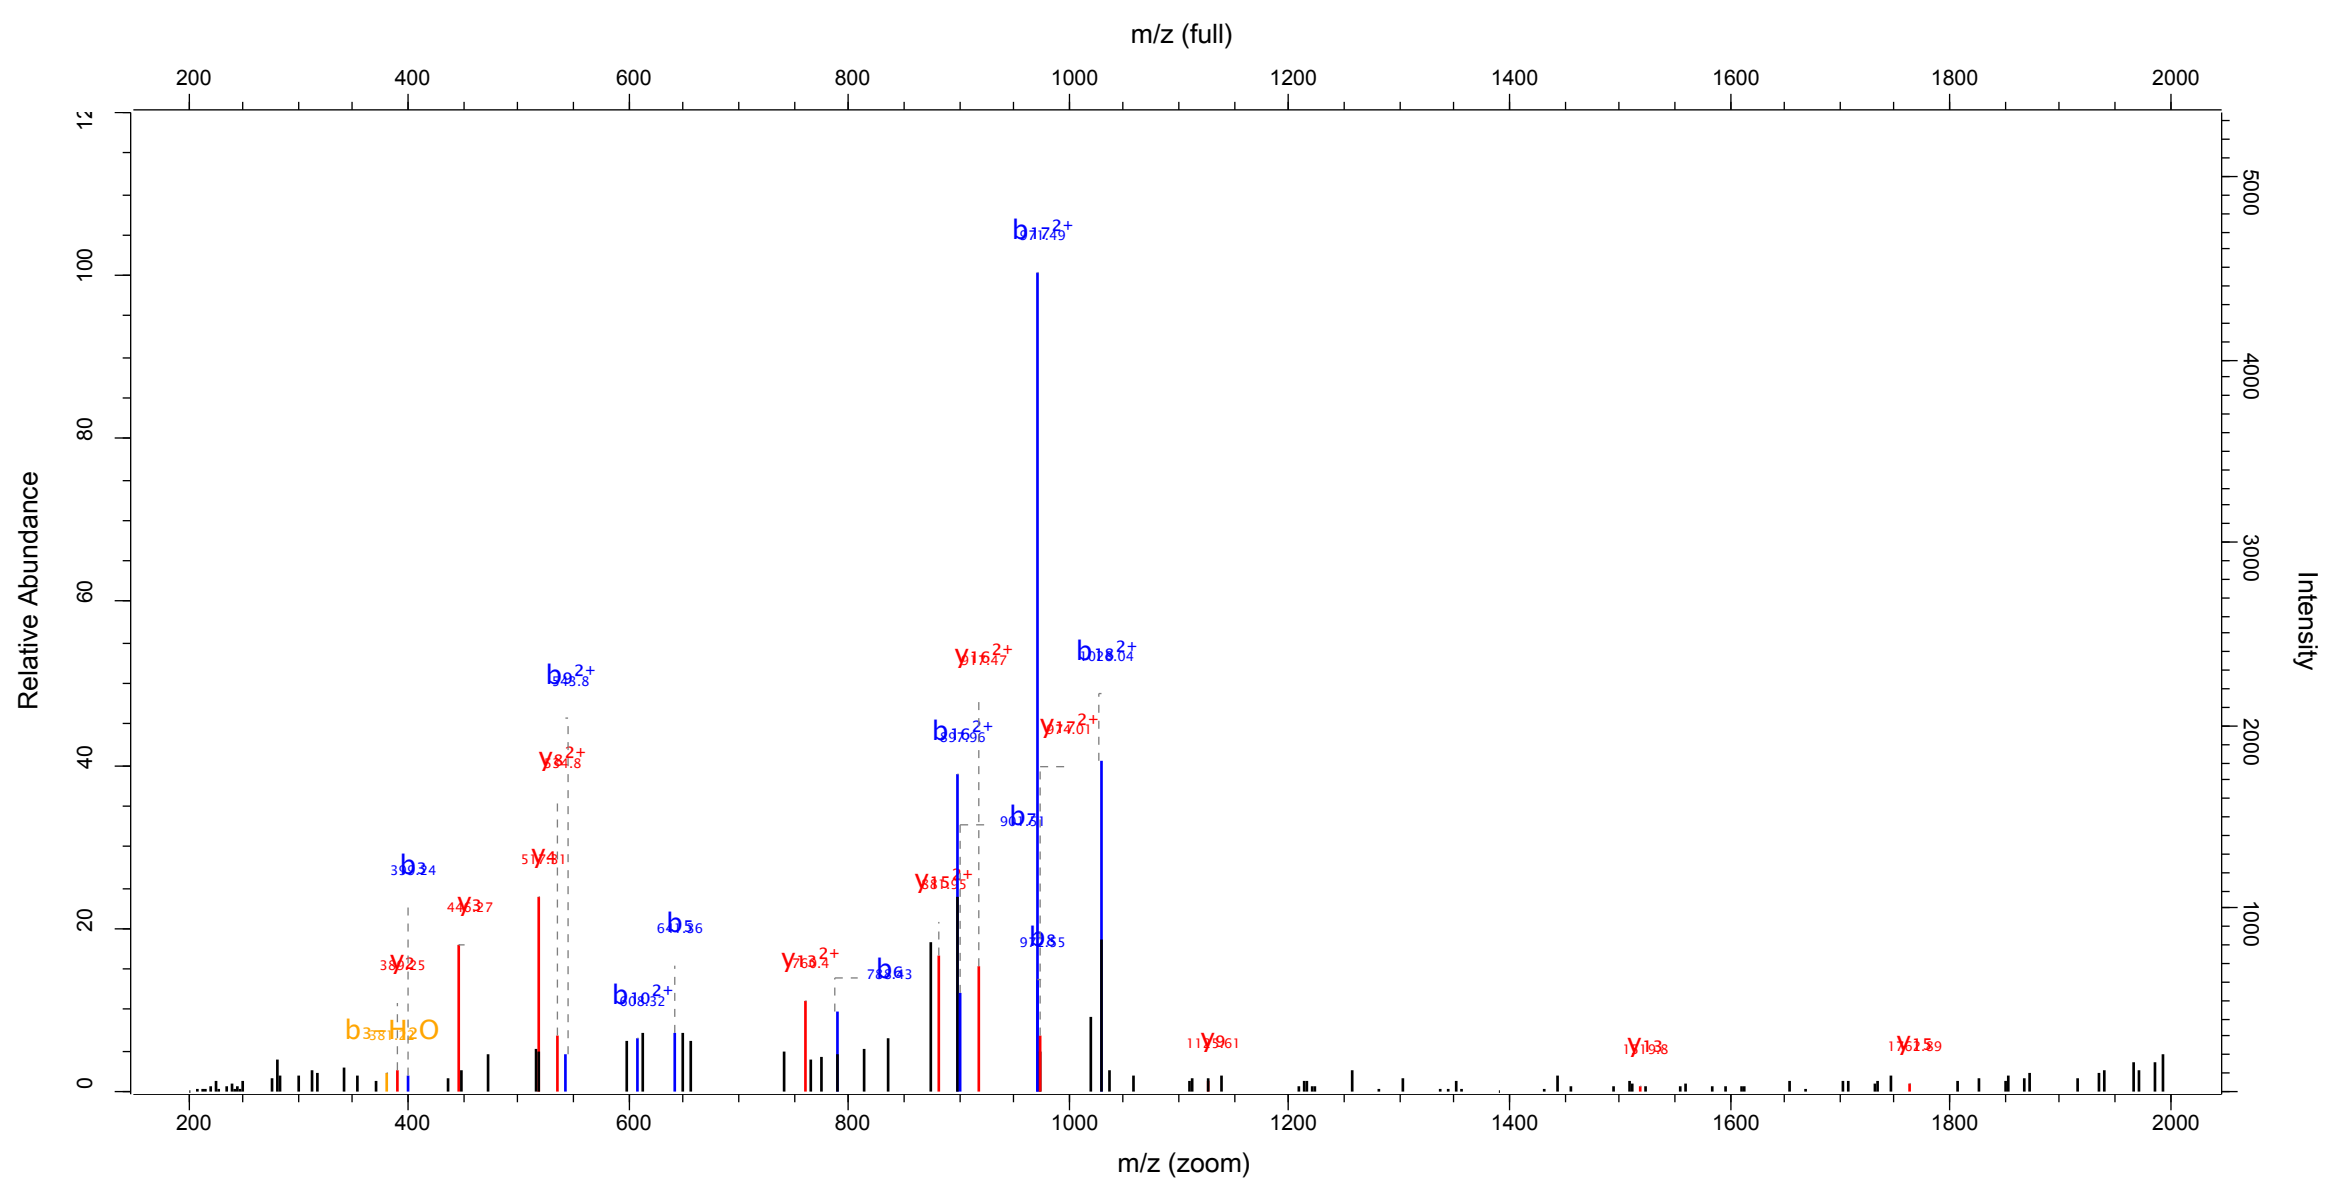

Scan number 10694 Raw file nak\_UBX6SAX3L\_14jan11\_13  
 Method ITMS; CID Pepti... 228.19

GlyGly Site Id 30

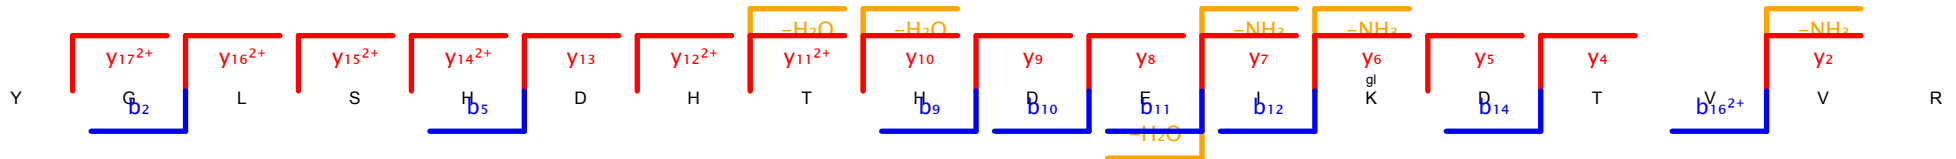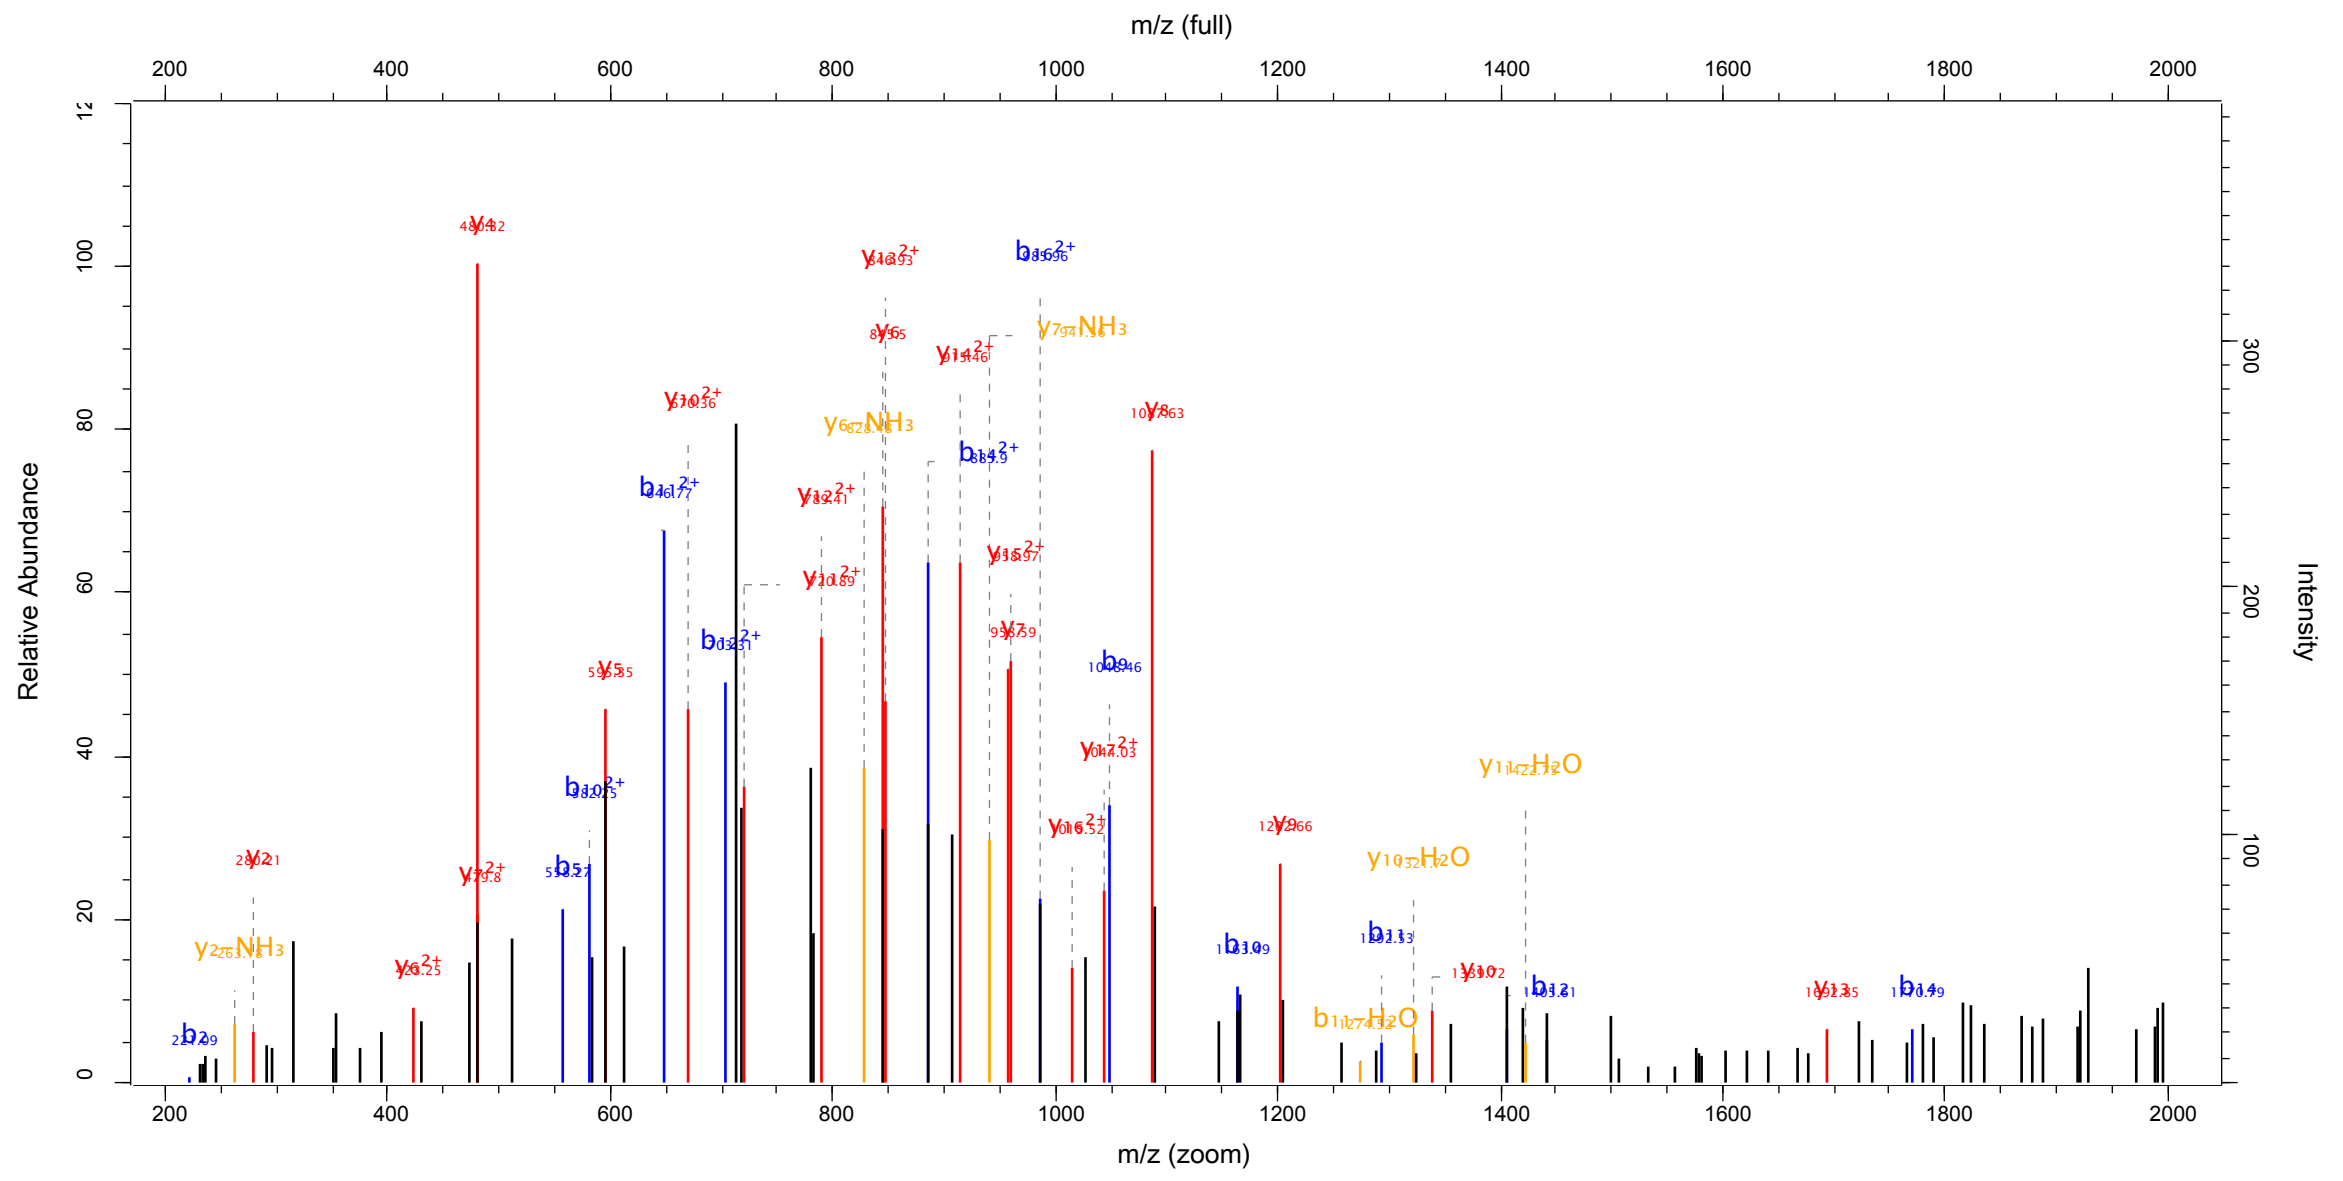

Scan number  
Method

11997  
ITMS; CID

Raw file  
Pepti...

nak\_ubx4HeavySAX5\_11nov10  
95.36

GlyGly Site Id 31 & 32

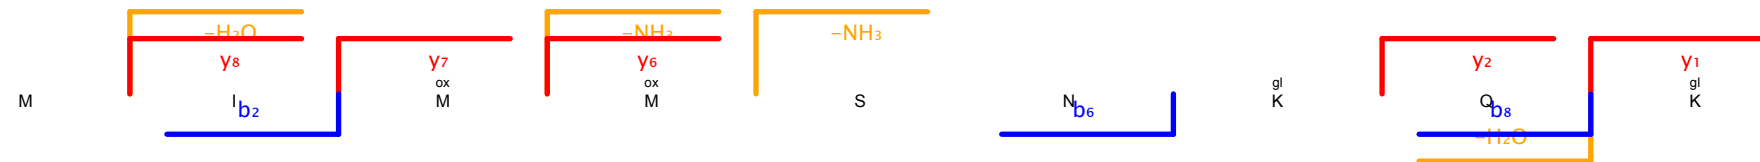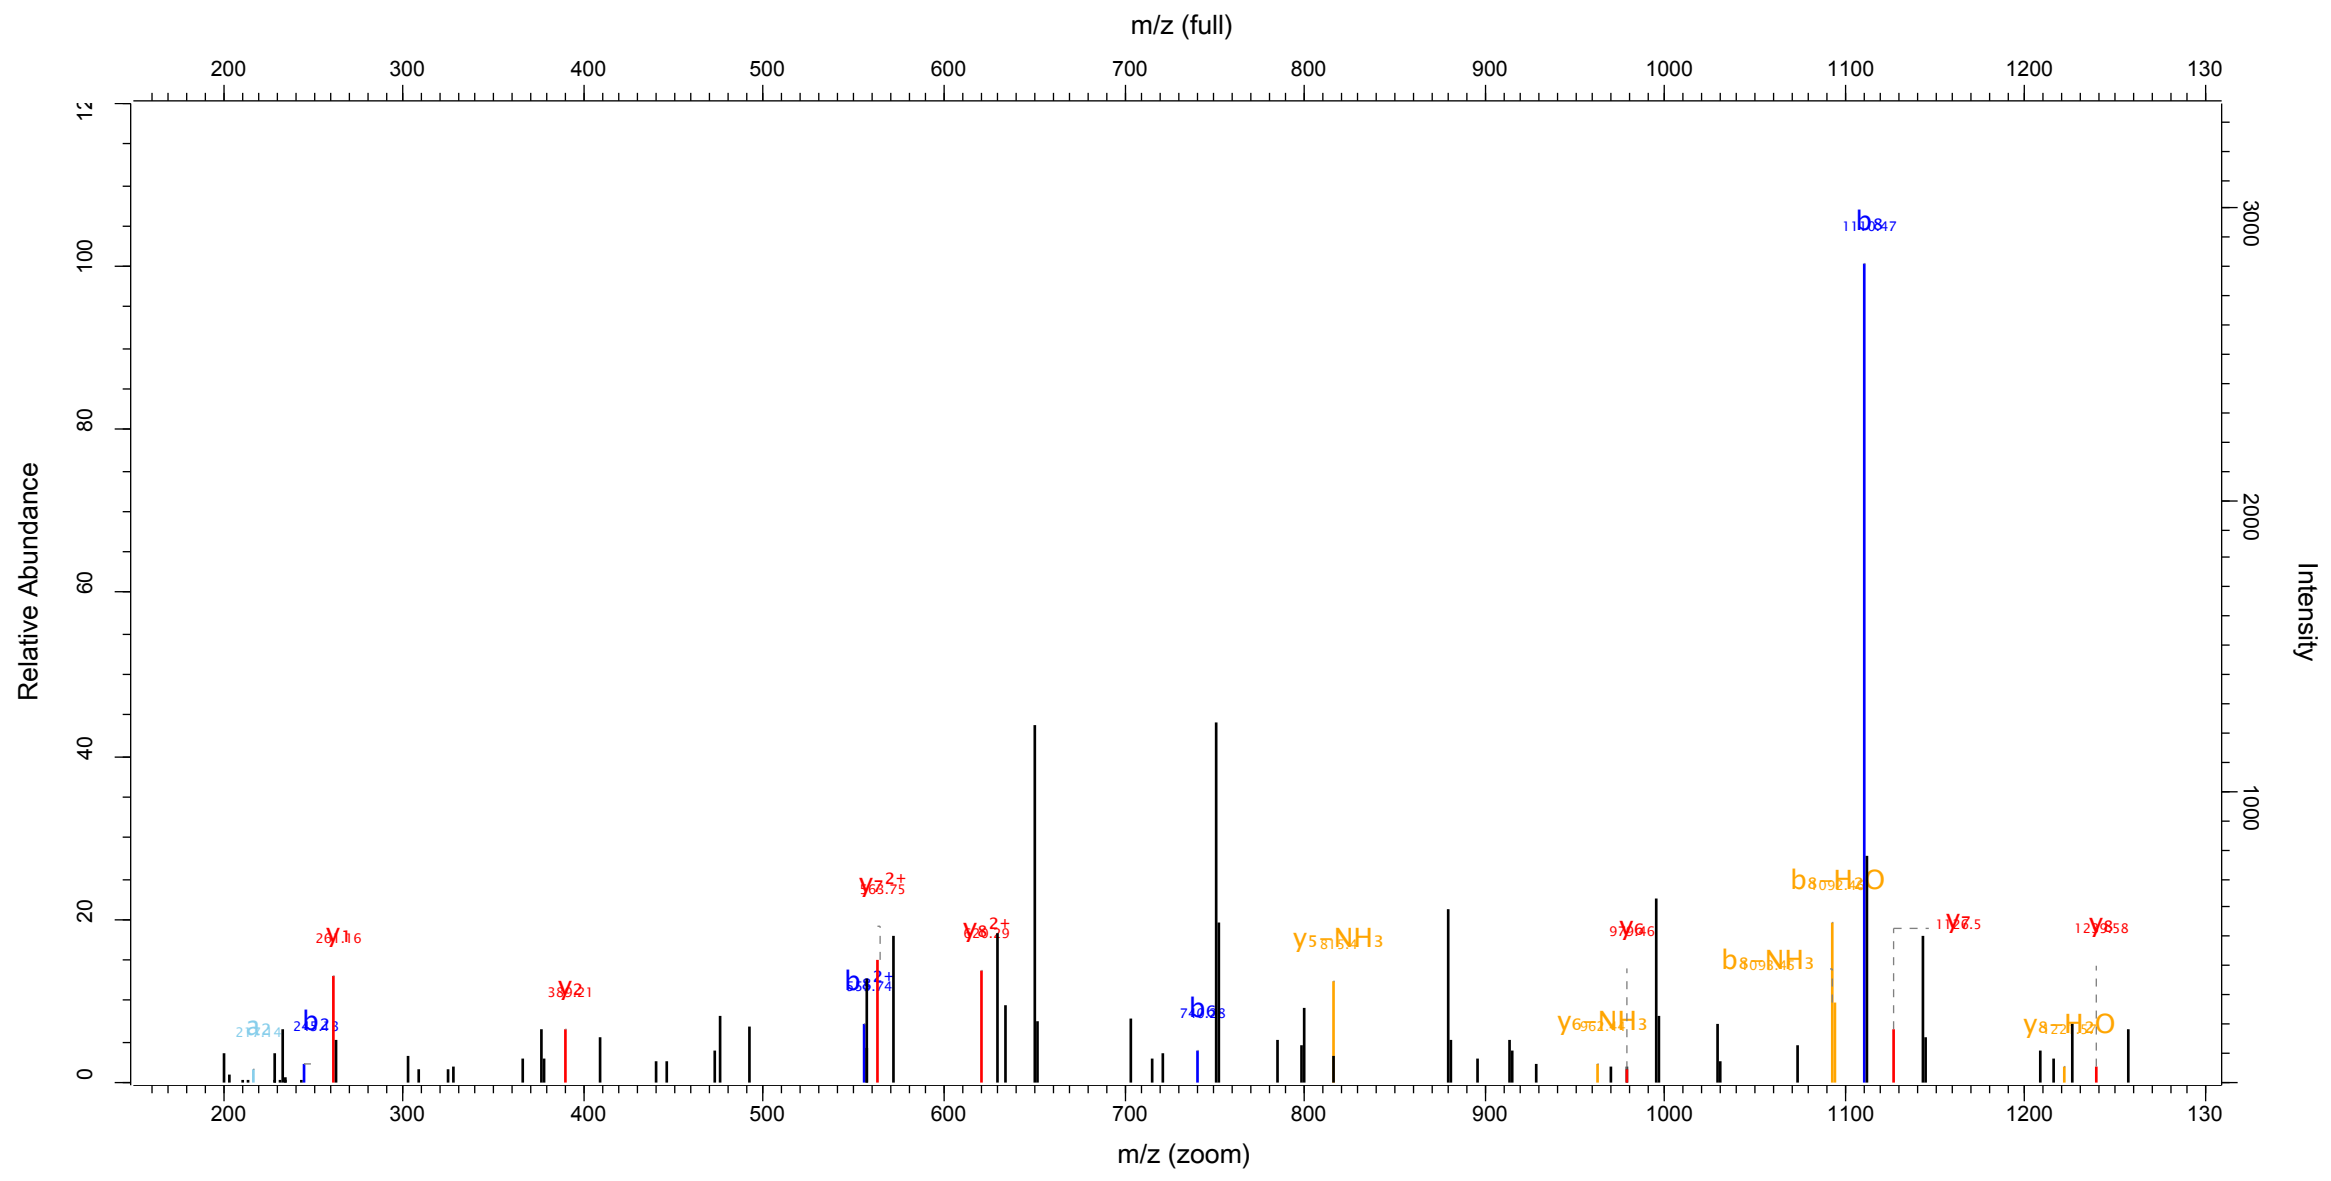

Scan number 26266 Raw file nak\_cdc48UbconjugatecontrolSAX3\_22may10\_12  
 Method ITMS; CID Pepti... 98.57

GlyGly Site Id 33

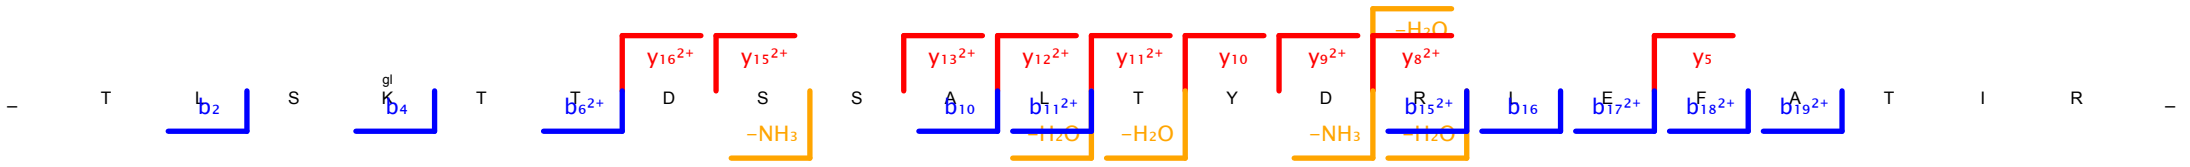

m/z (full)

200 400 600 800 1000 1200 1400 1600 1800 2000

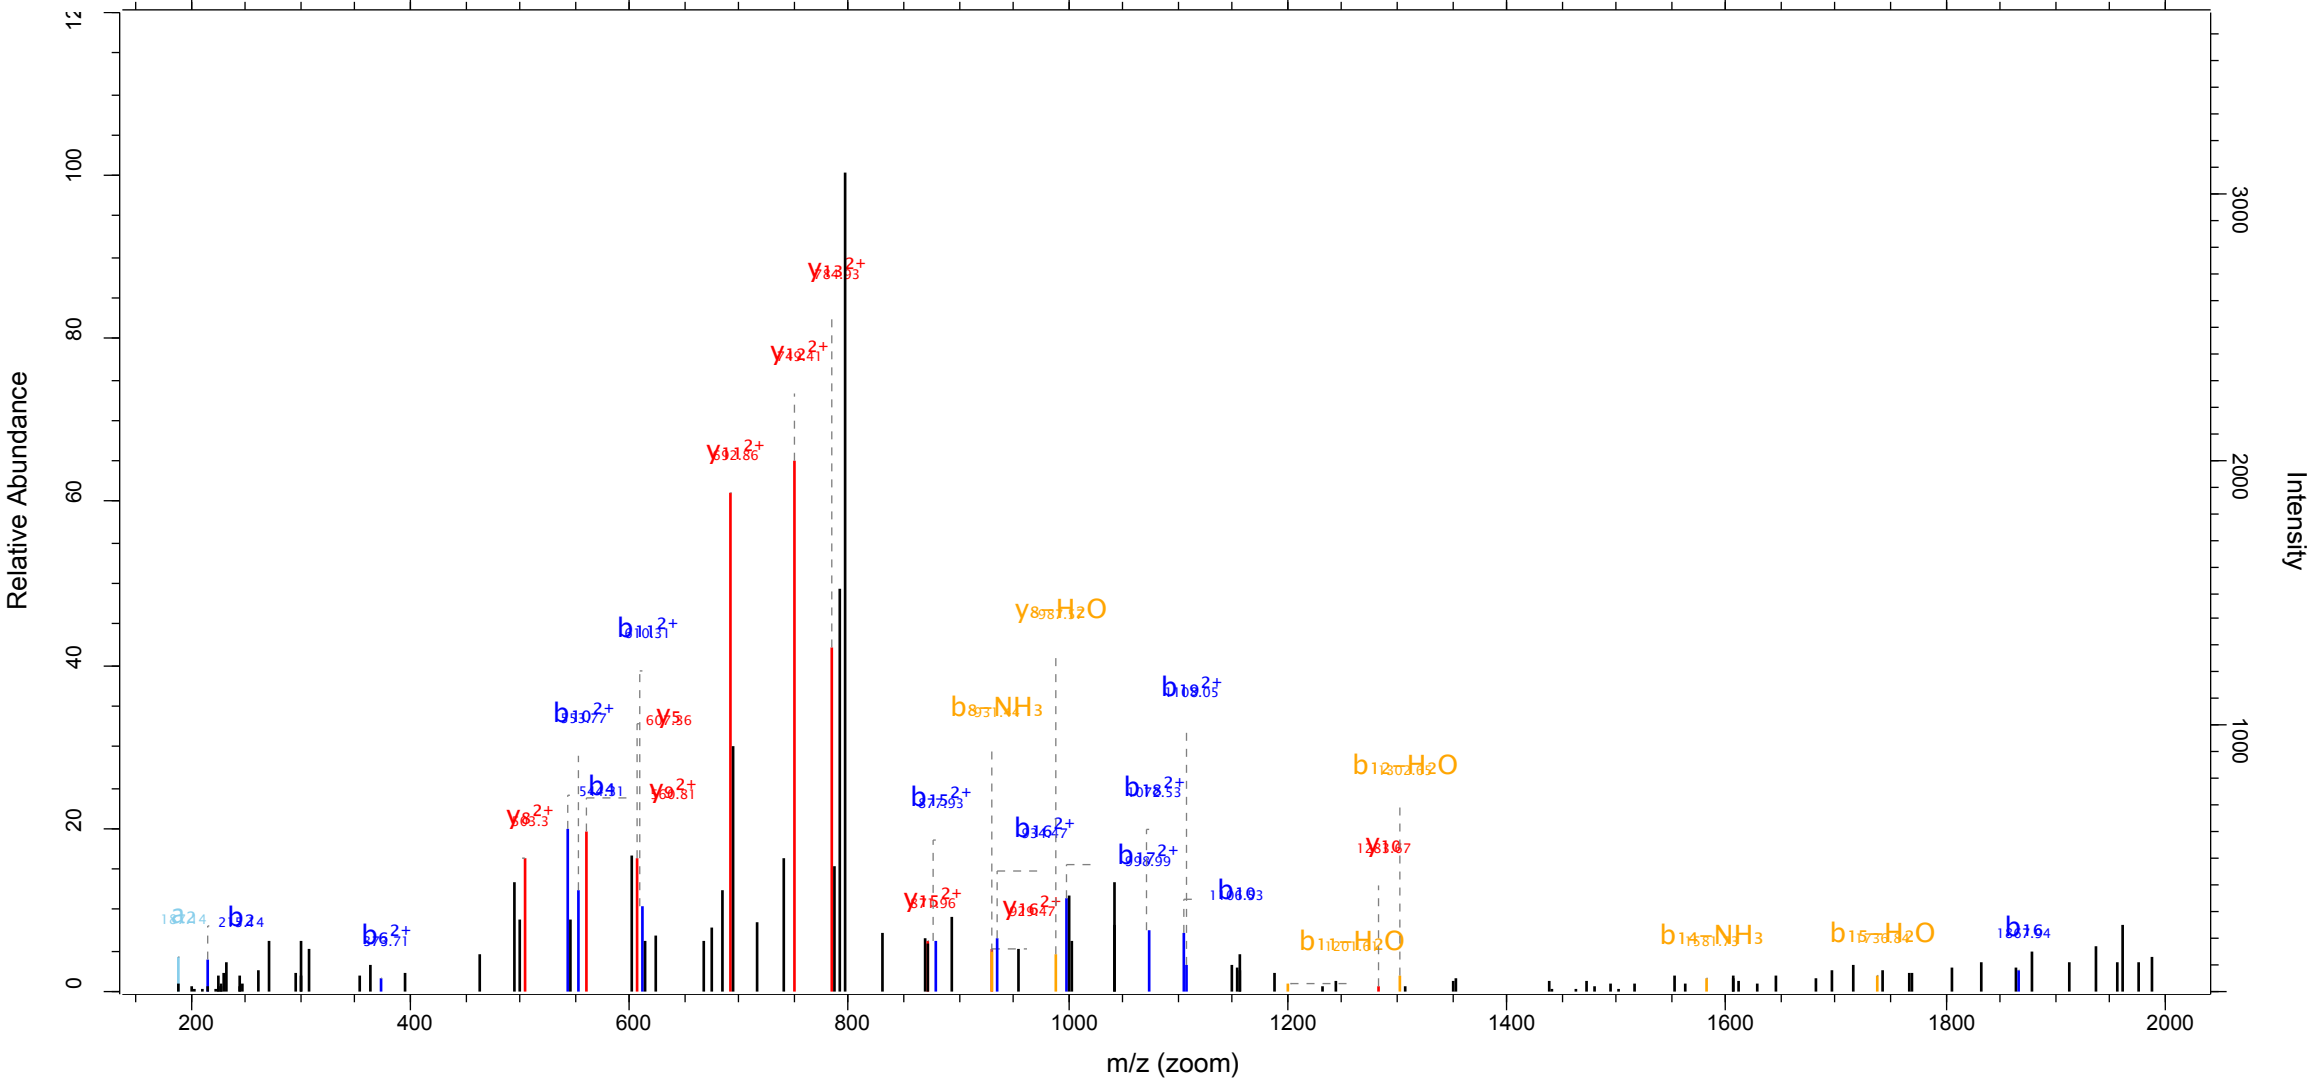



Scan number  
Method

20635  
ITMS; CID

Raw file  
Pepti...

nak\_WTonetooneSAX1\_4feb11\_01  
179.79

GlyGly Site Id 34

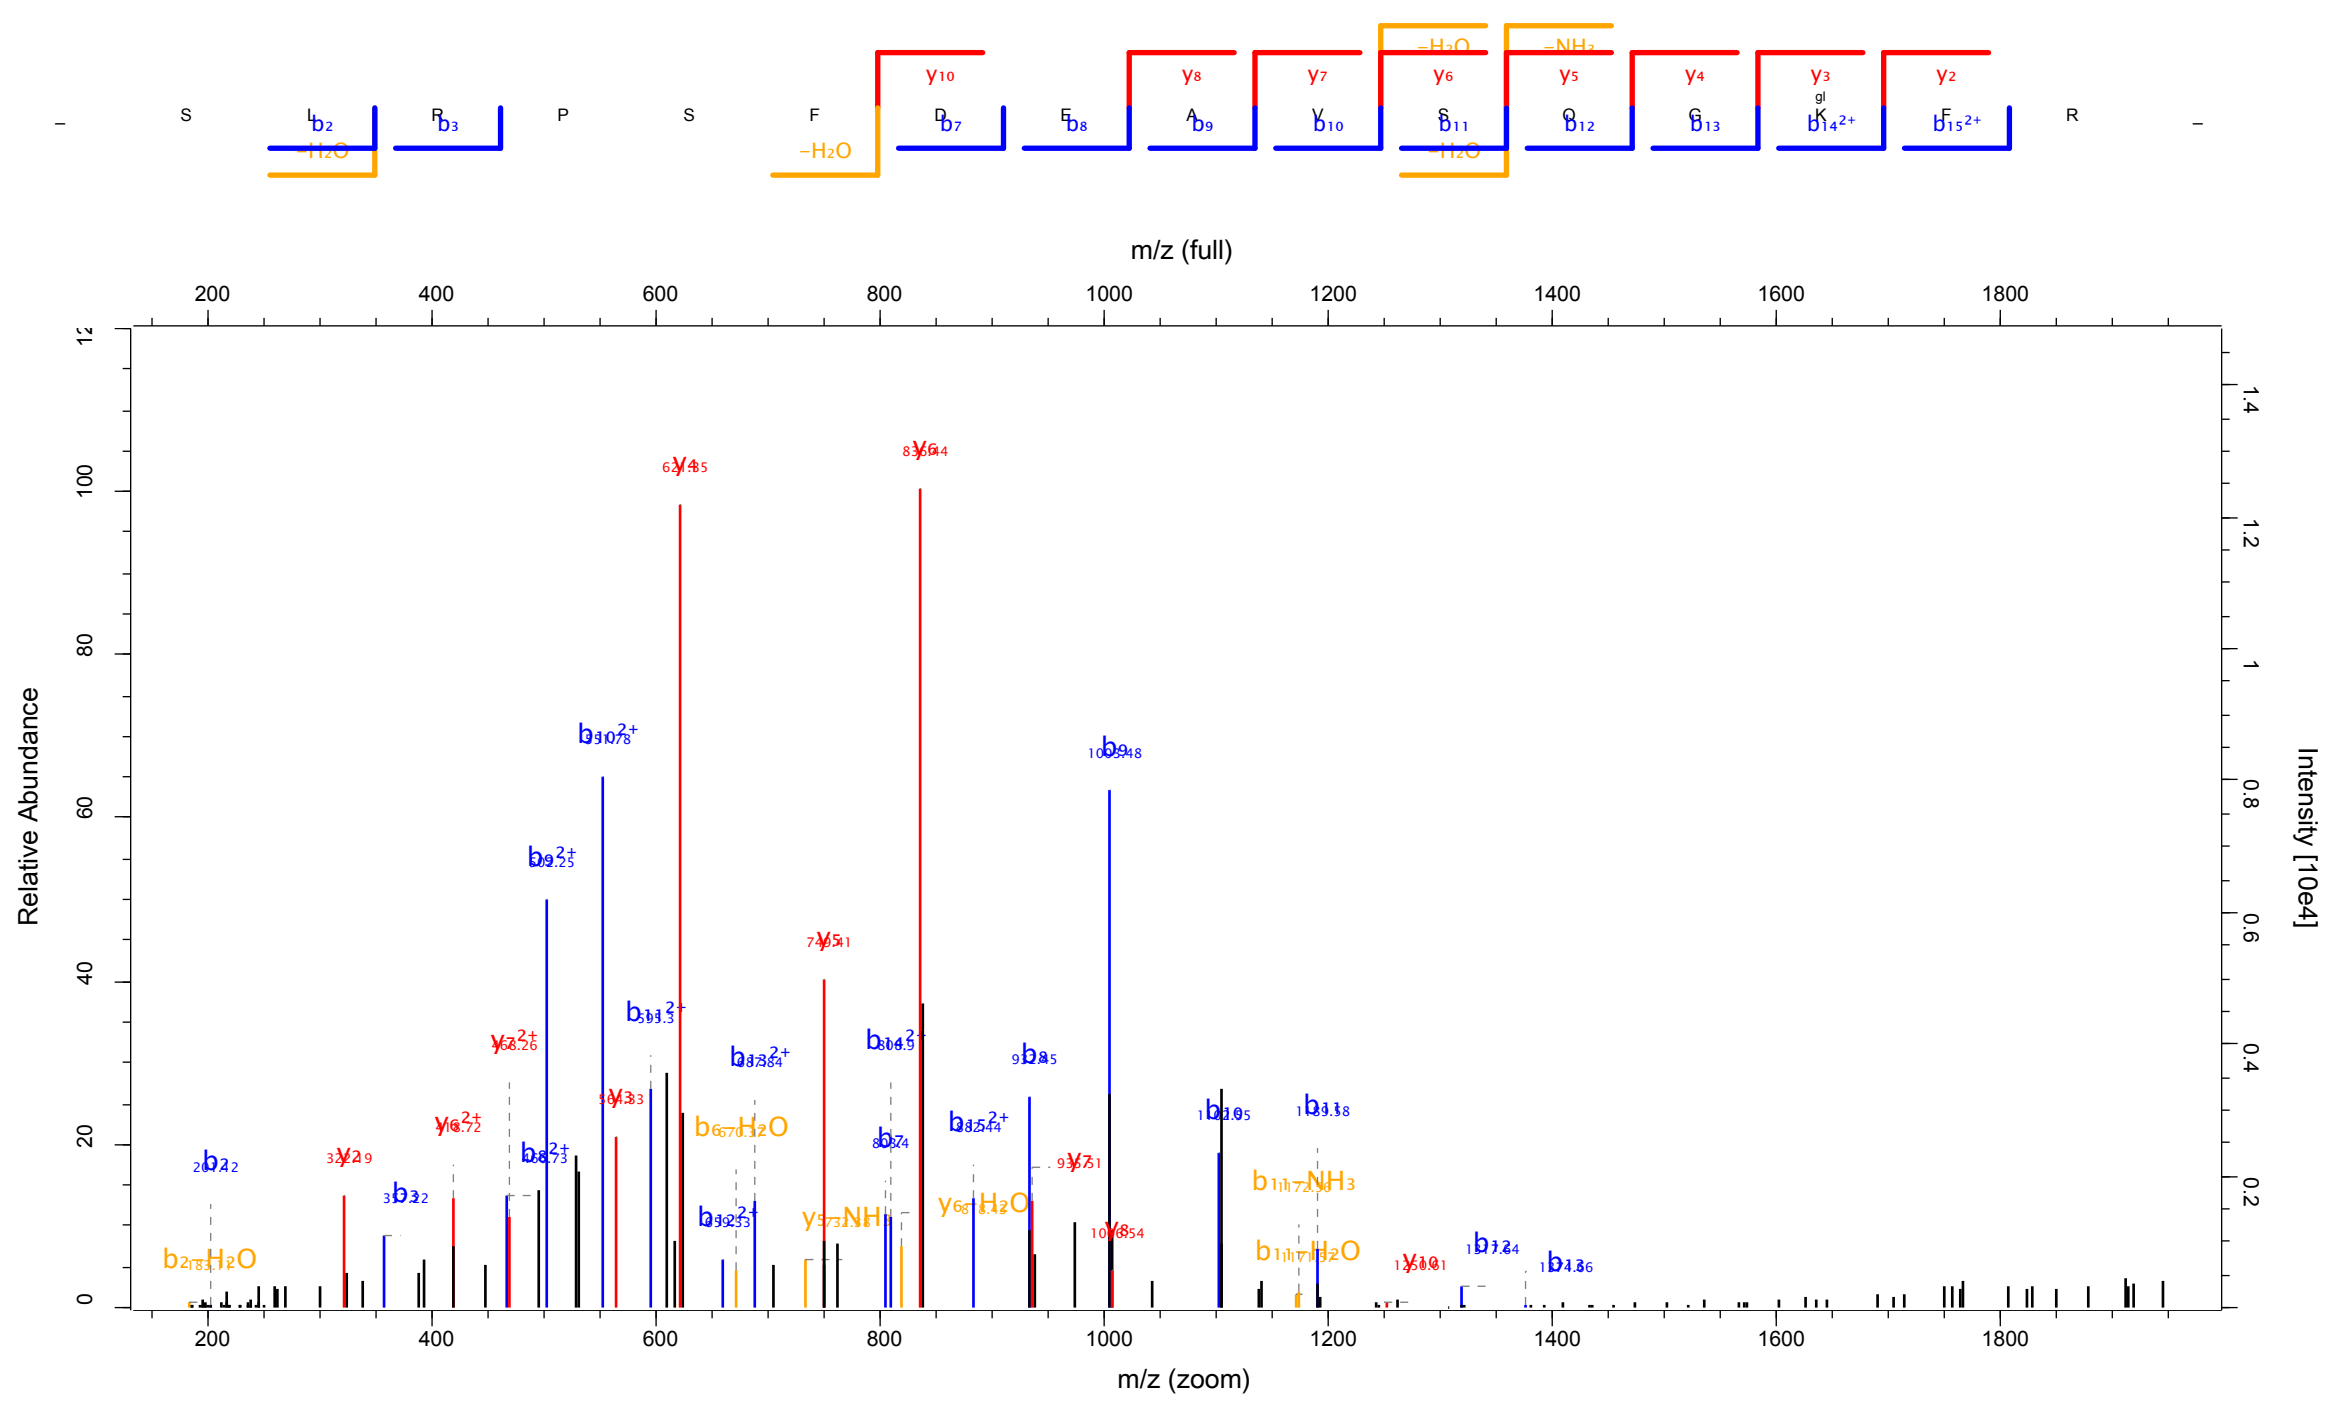

Scan number 27217 Raw file nak\_UBX2LSAX3\_8feb11\_03 **GlyGly Site Id 35**  
 Method ITMS; CID Pepti... 157.98

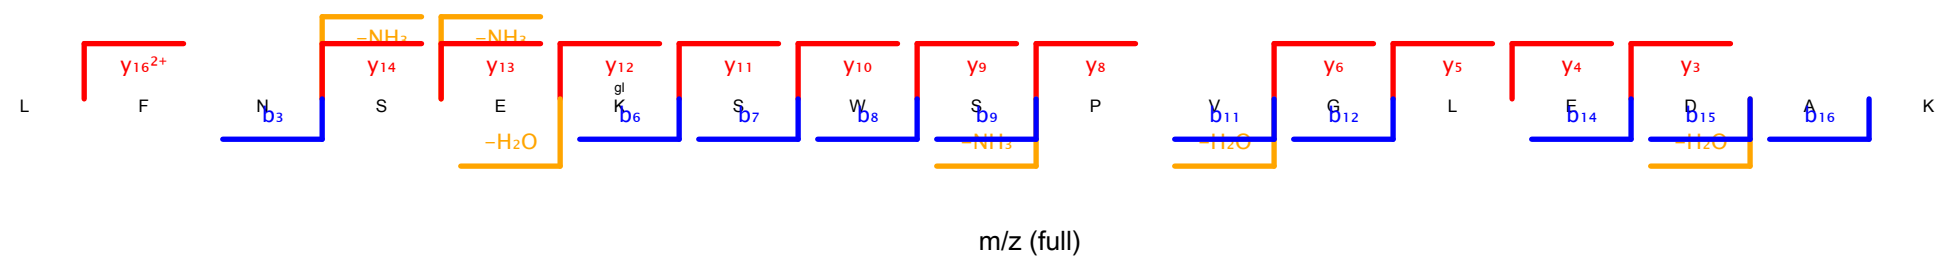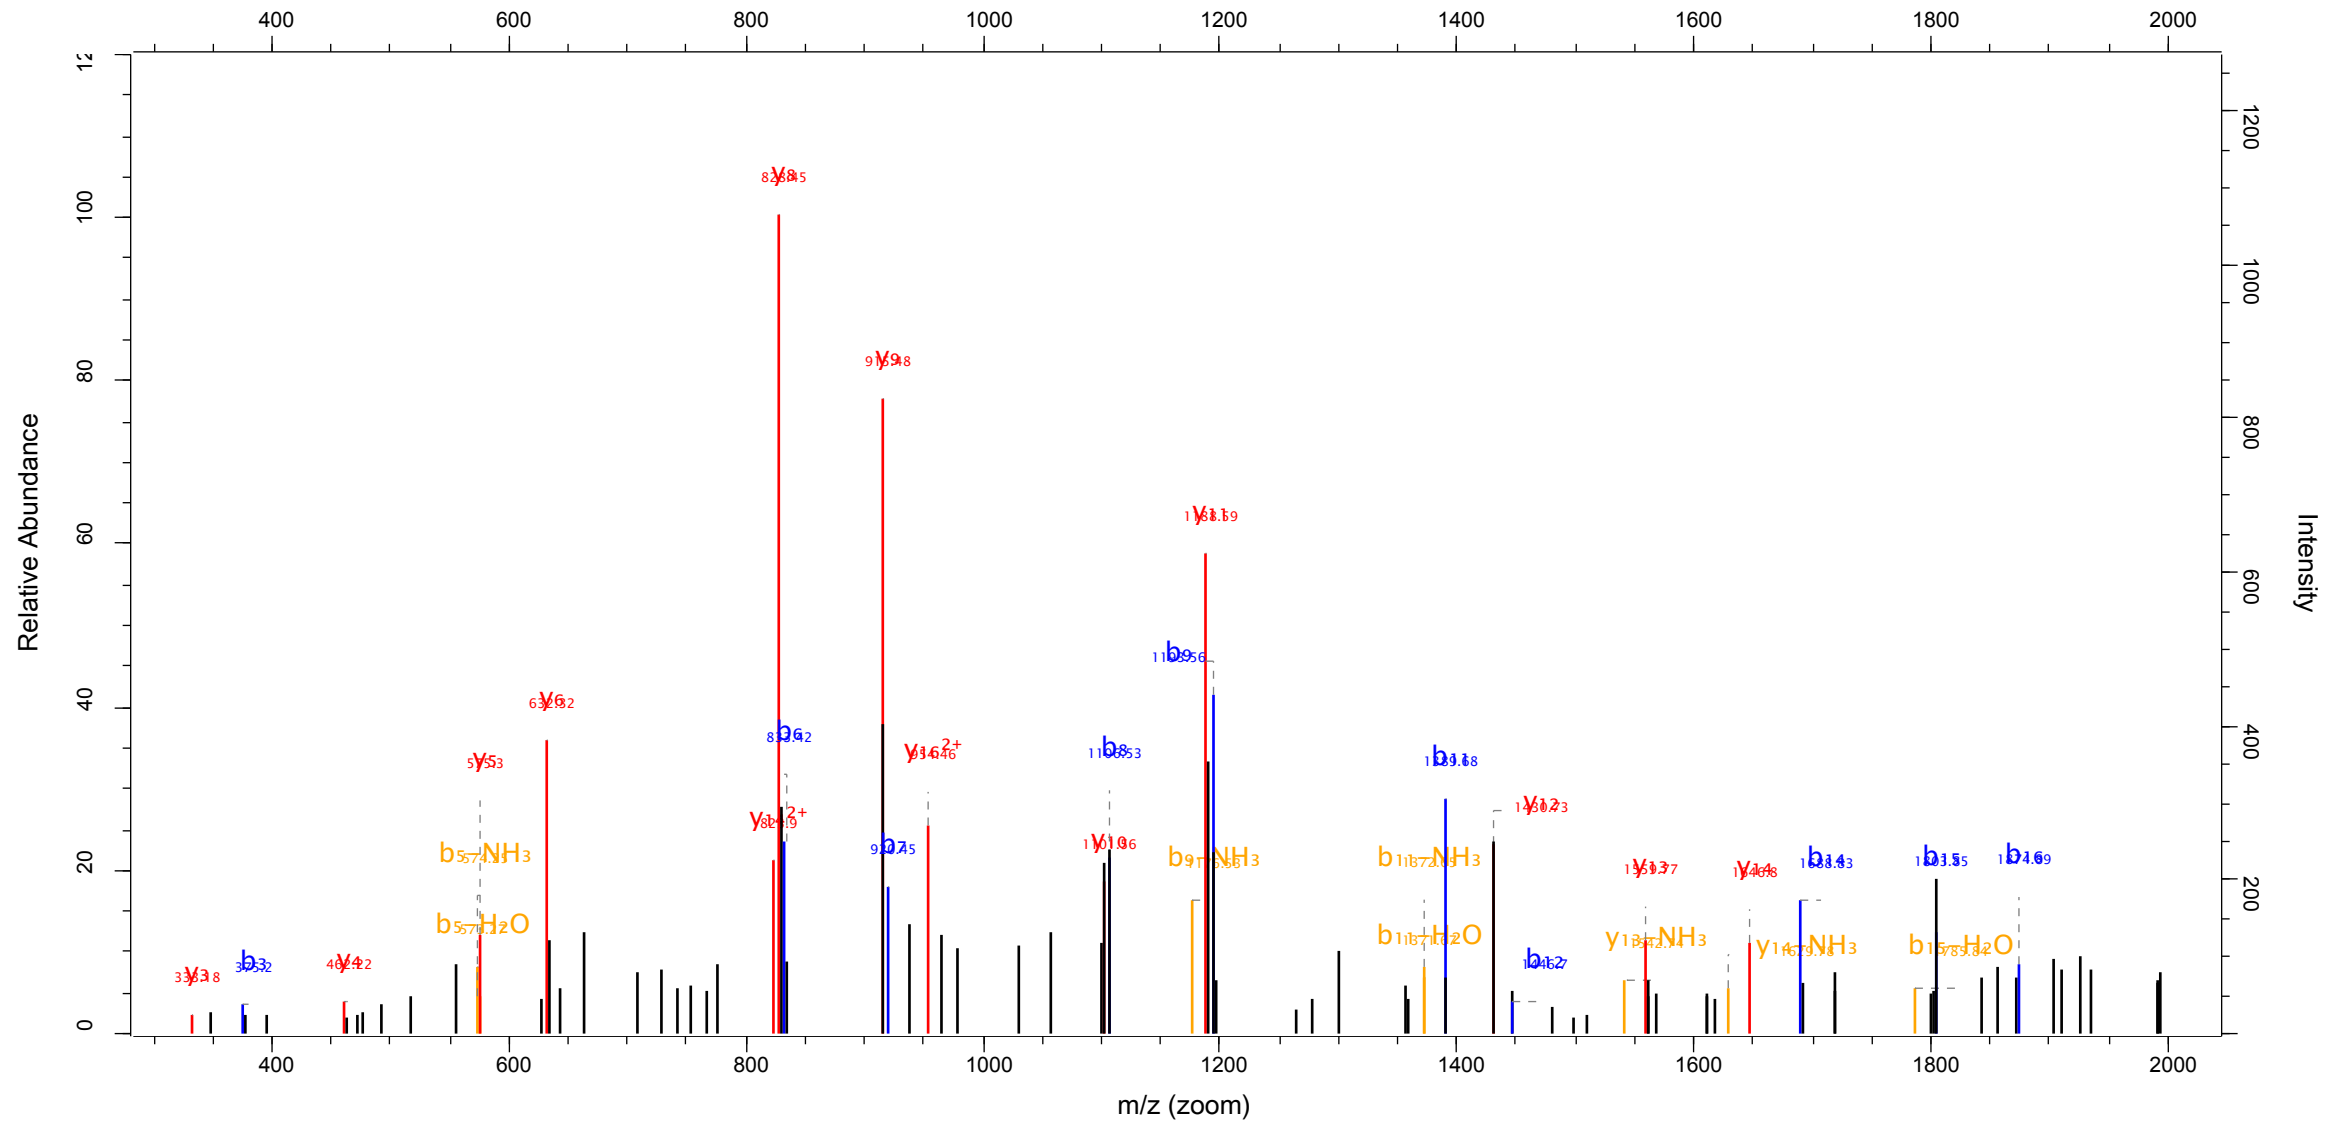

Scan number 18398 Raw file nak\_UBX7LSAX2\_20Jan11\_2  
 Method ITMS; CID Pepti... 188.27

GlyGly Site Id 36 & 37

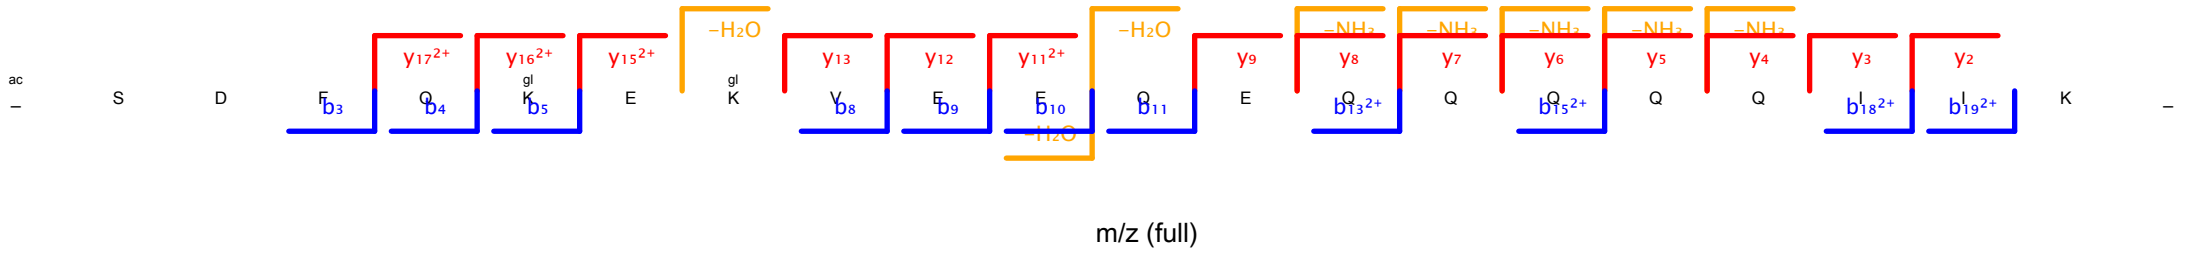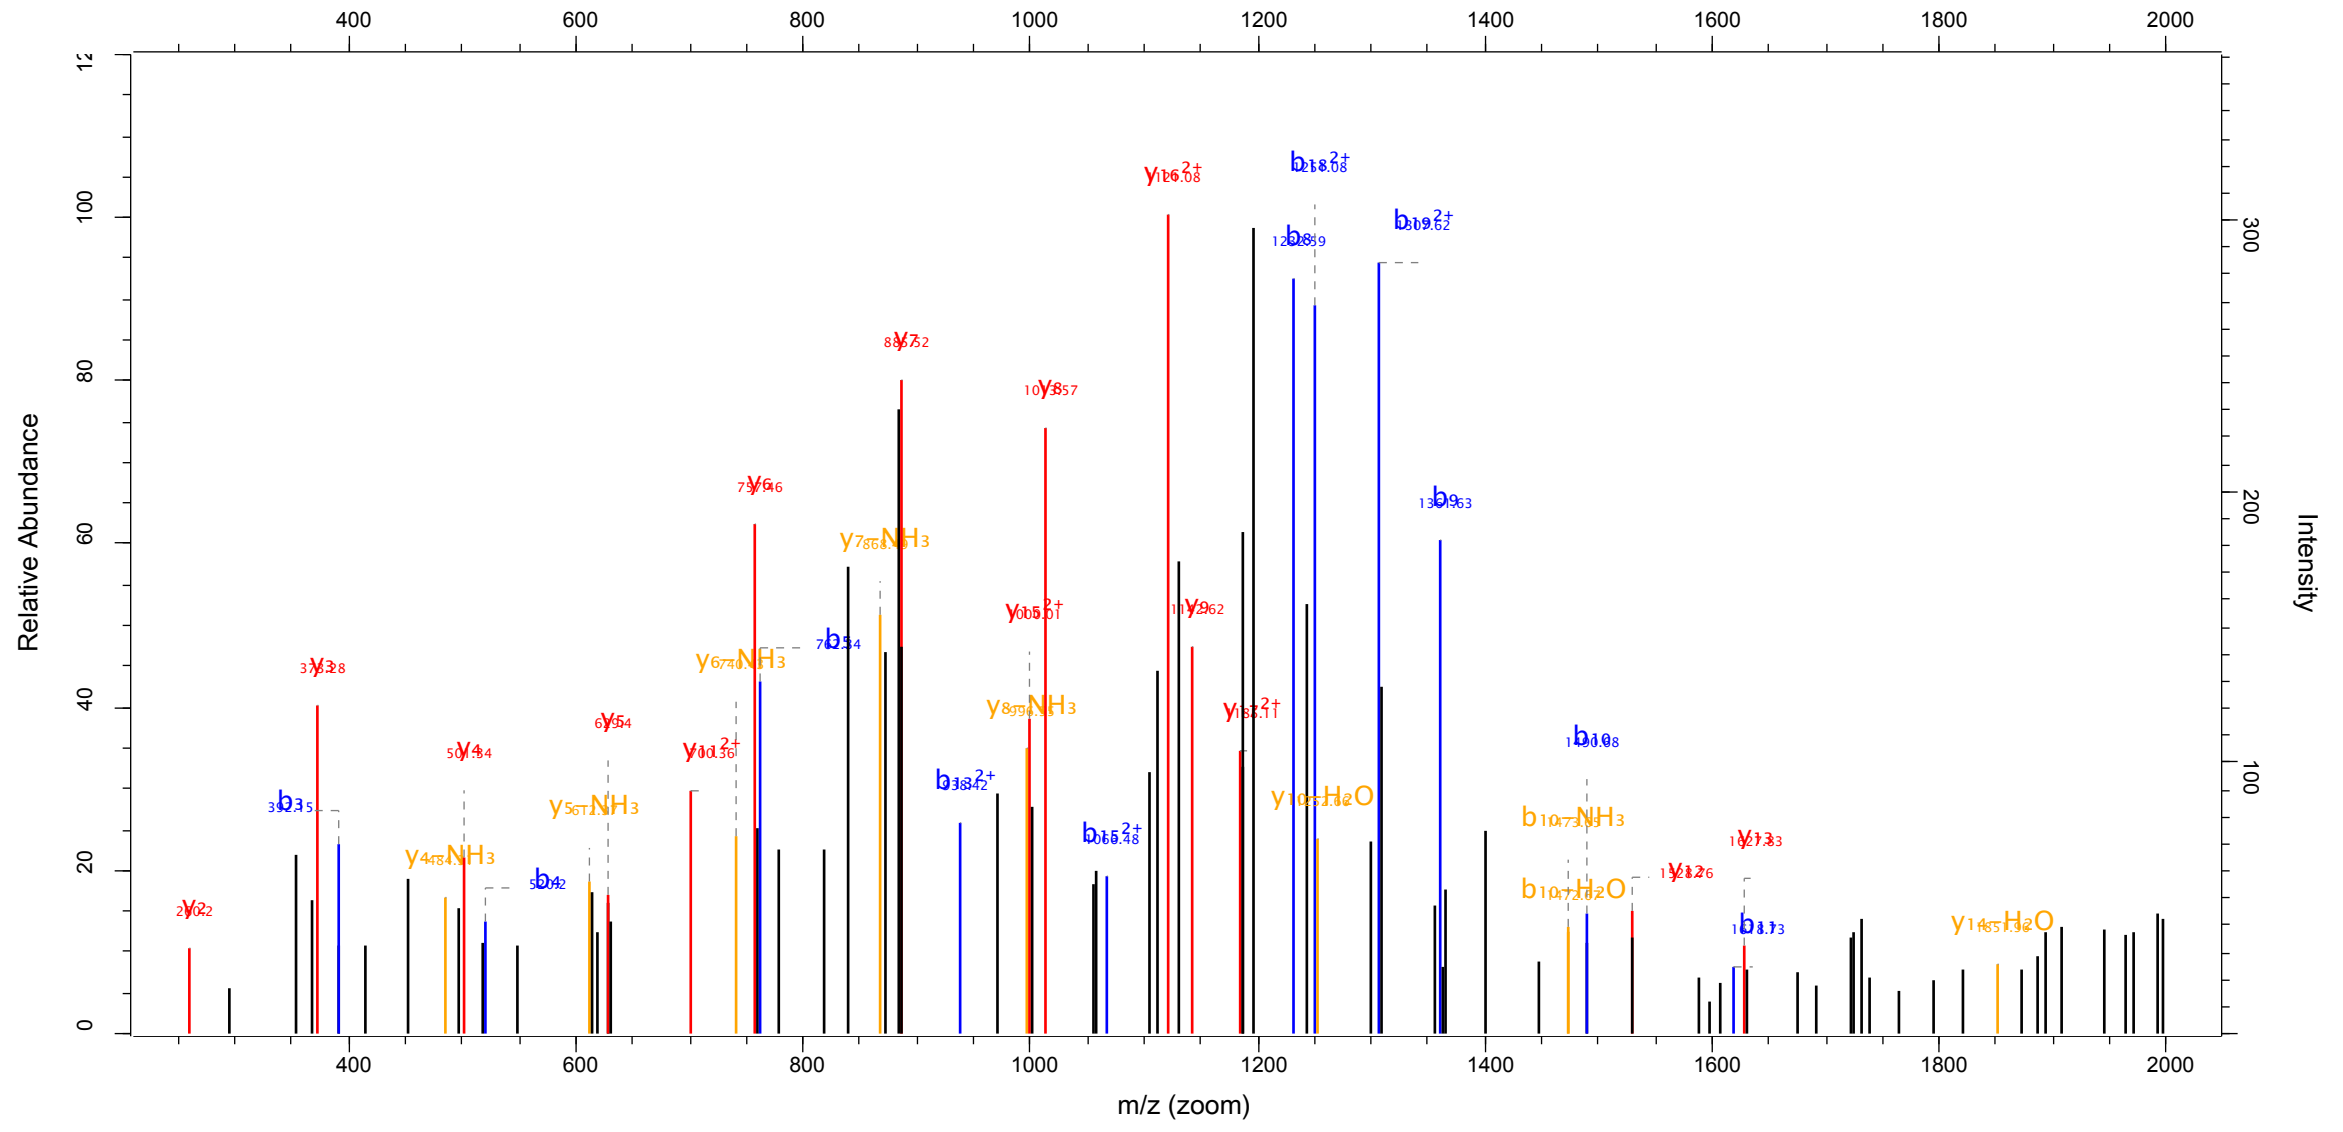

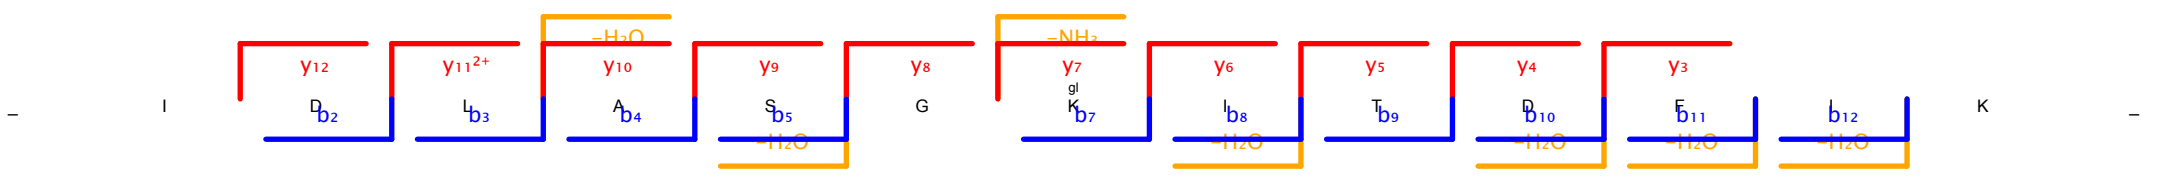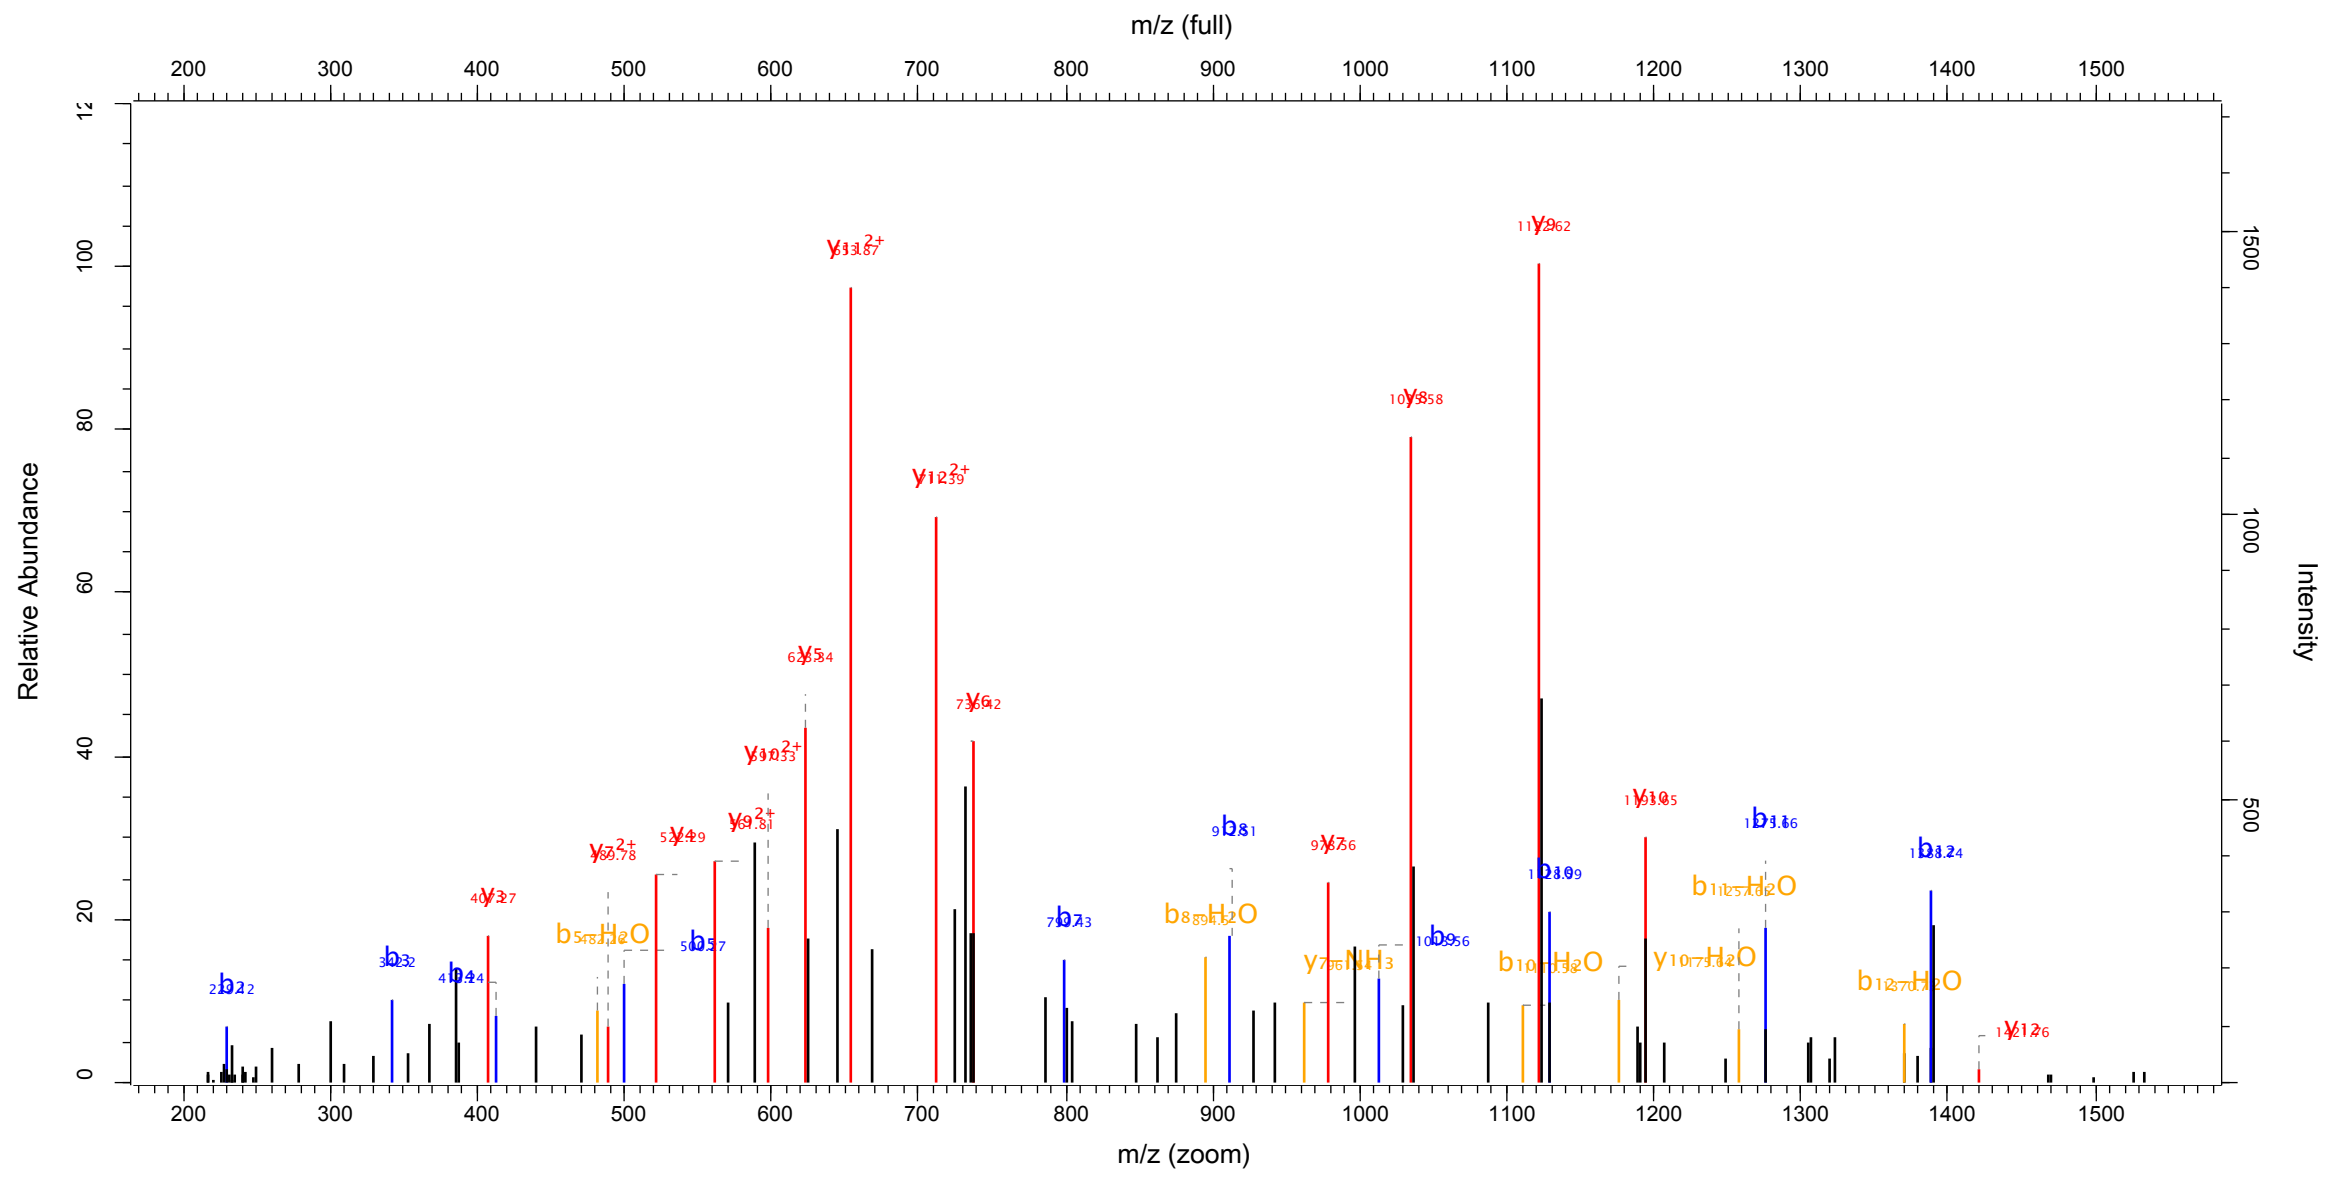

Scan number 33510 Raw file nak\_UBX3HSAX3\_28jan11\_29  
 Method ITMS; CID Pepti... 89.62

GlyGly Site Id 39

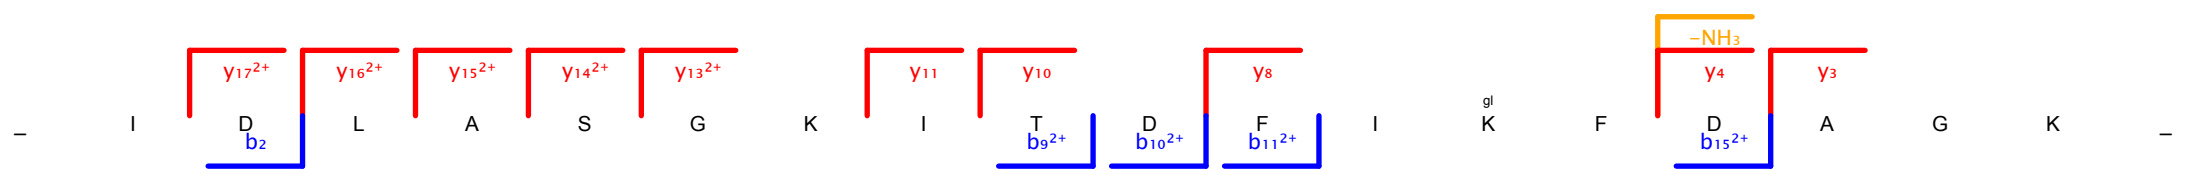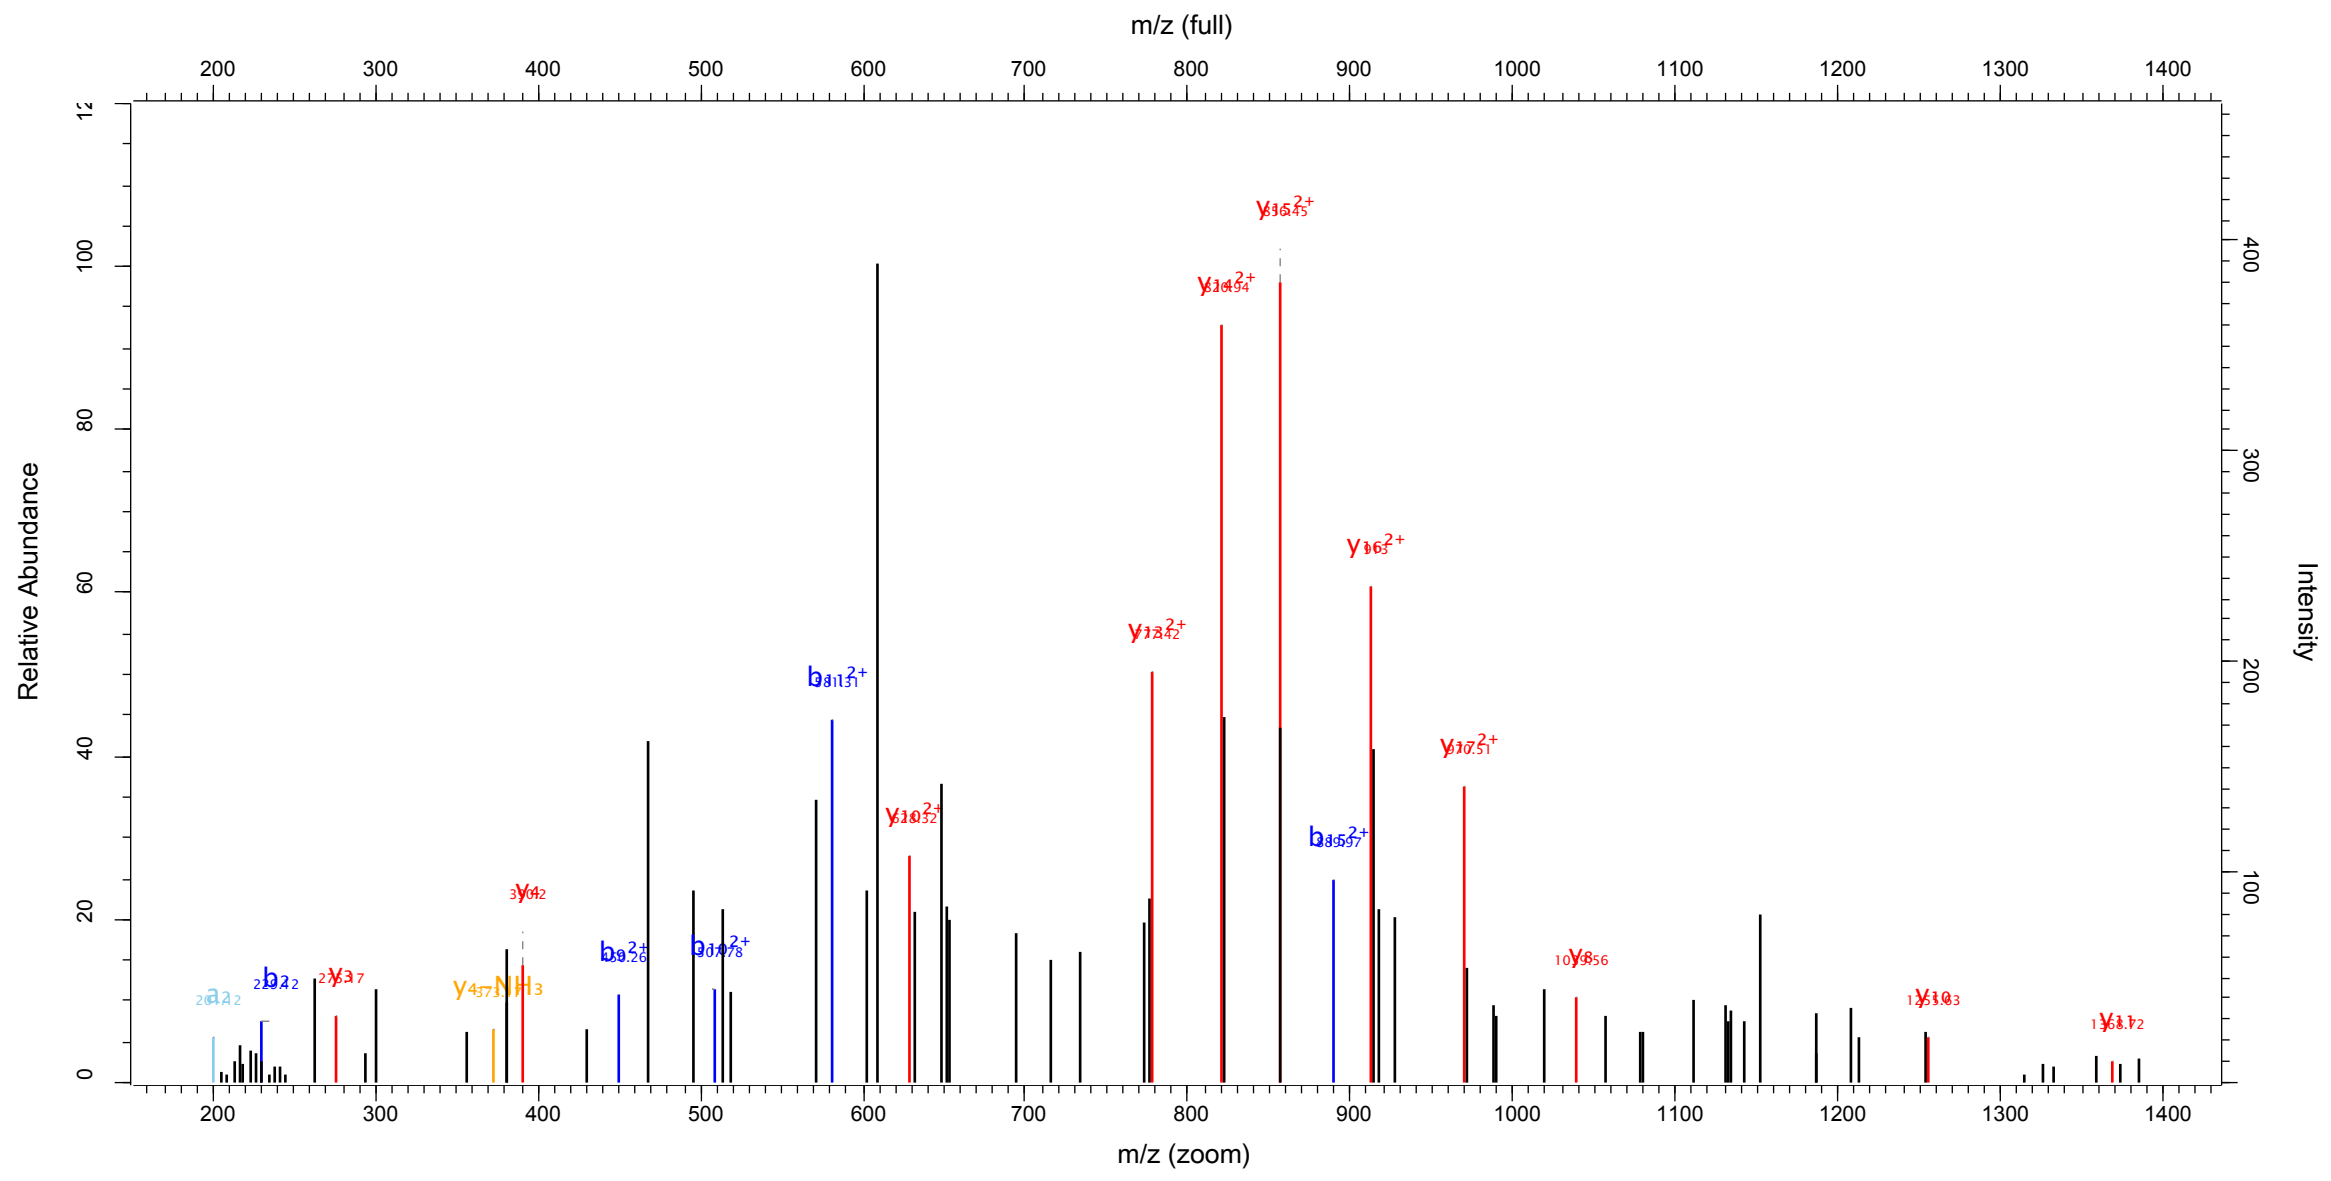

Scan number  
Method

36803  
ITMS; CID

Raw file  
Pepti...

nak\_UBX2HSAX2\_8feb11\_06  
134.76

GlyGly Site Id 40

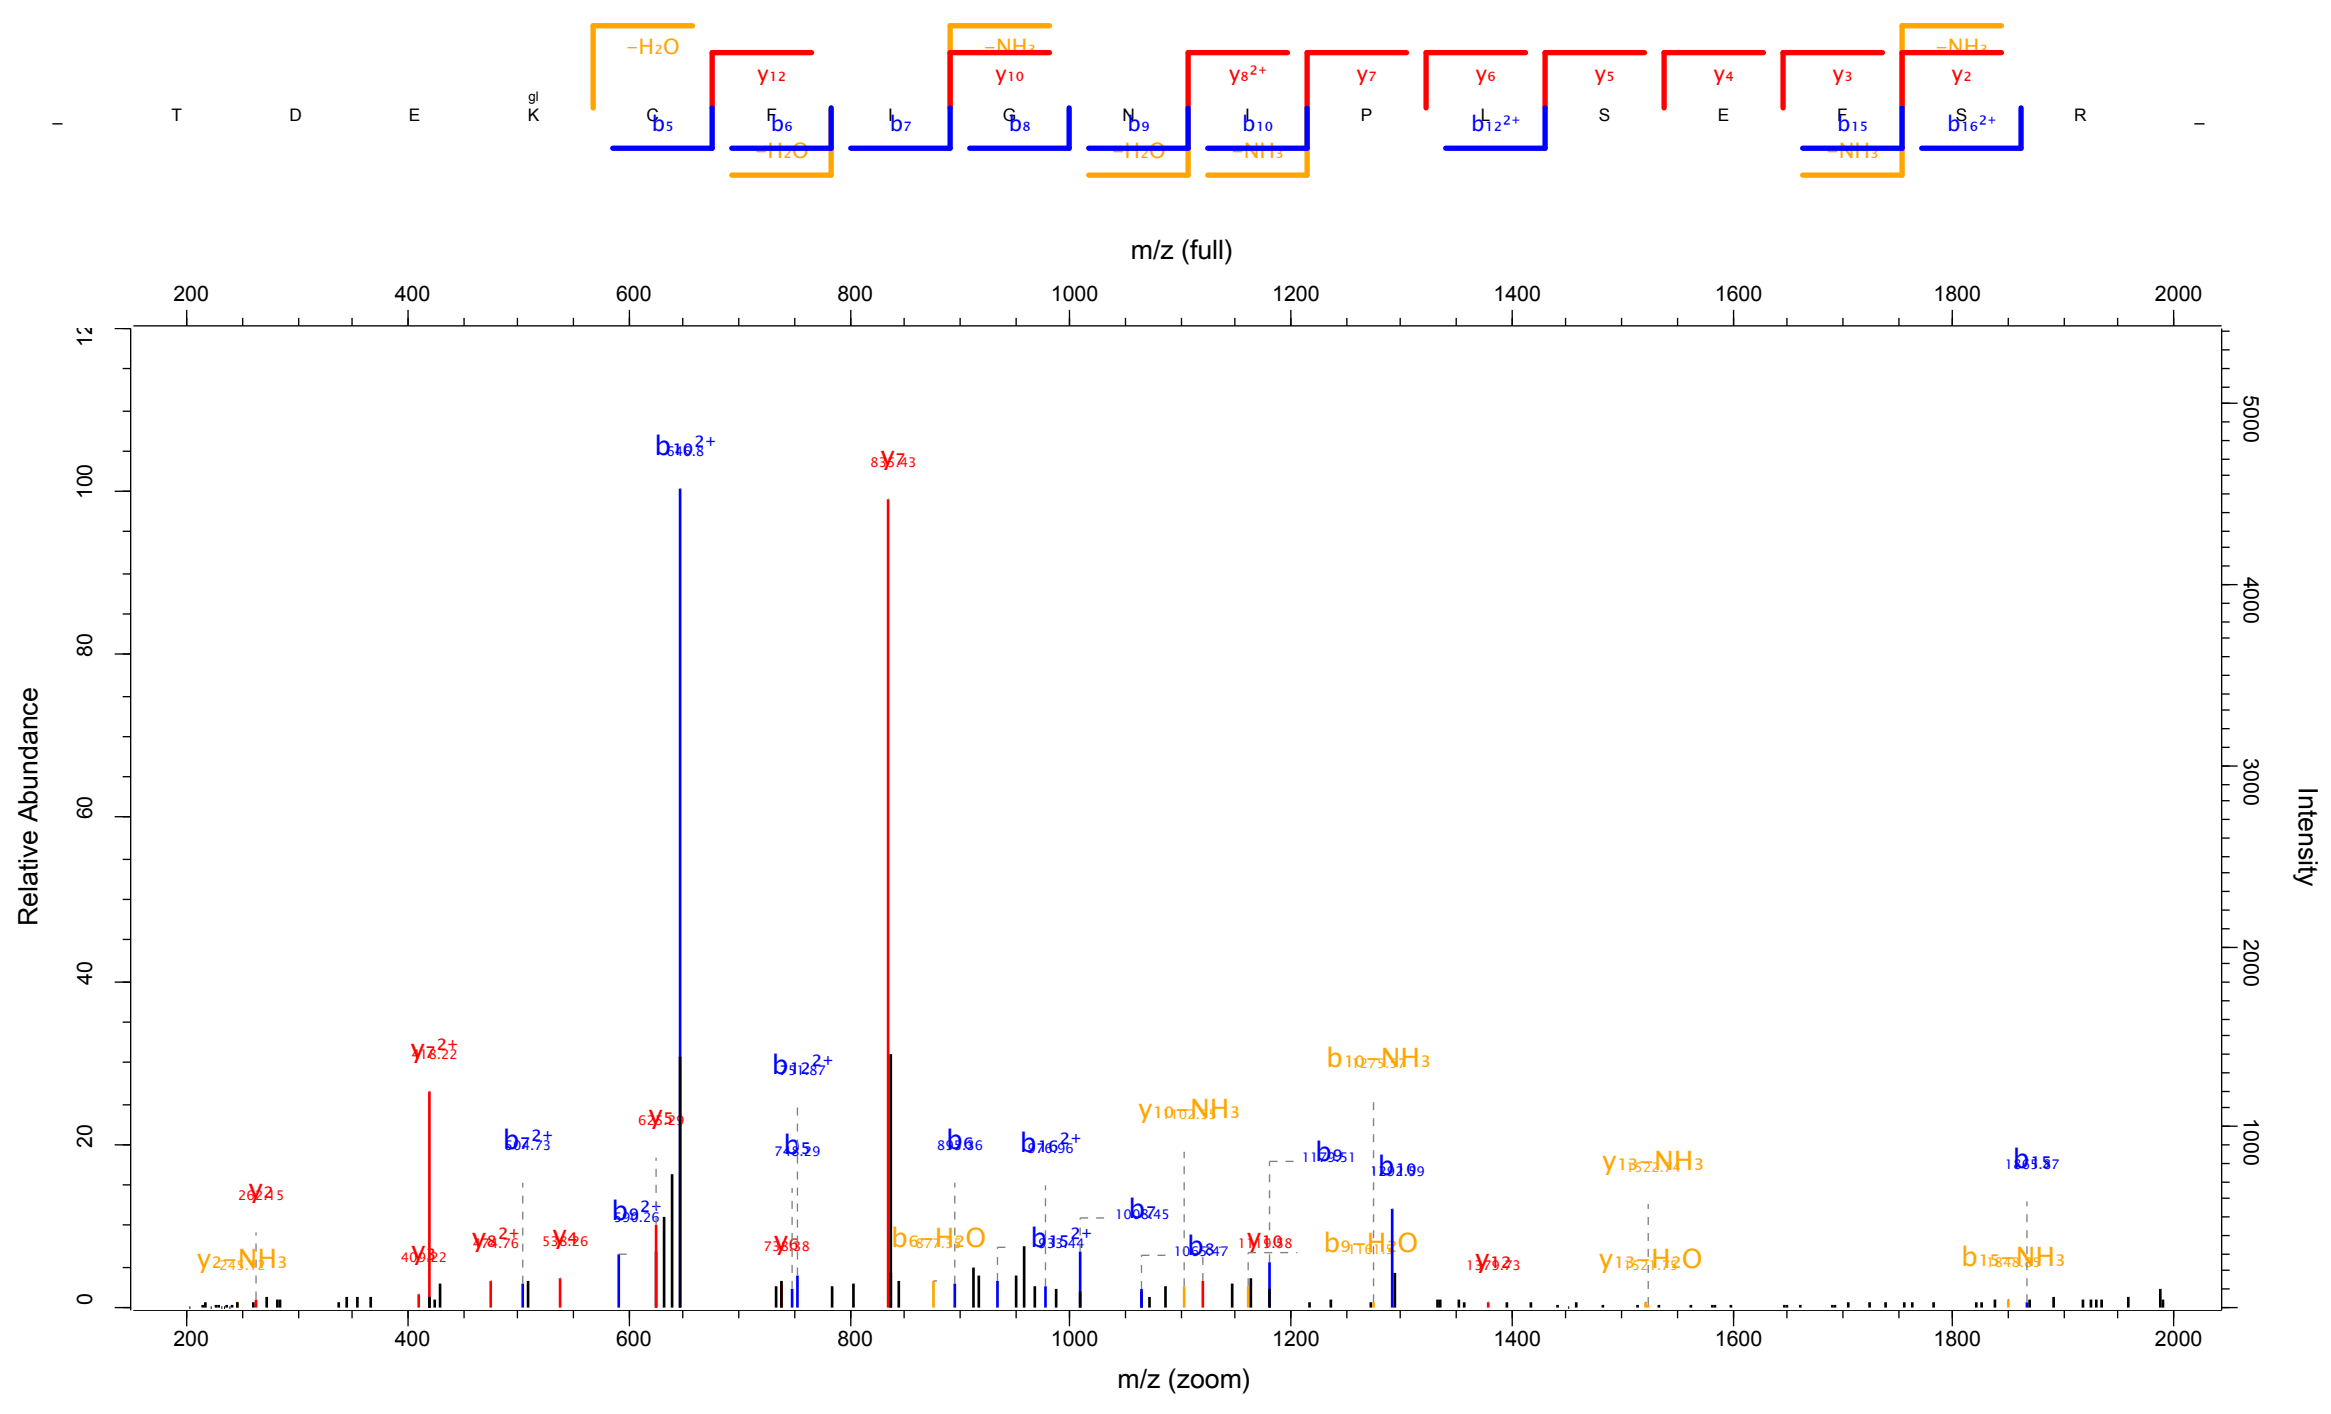

Scan number 36246 Raw file nak\_UBX3LSAX1\_28jan11\_19  
 Method ITMS; CID Pepti... 168.69

GlyGly Site Id 41

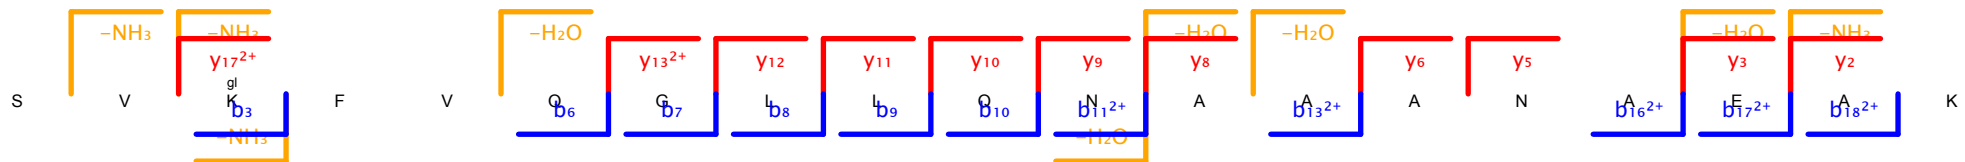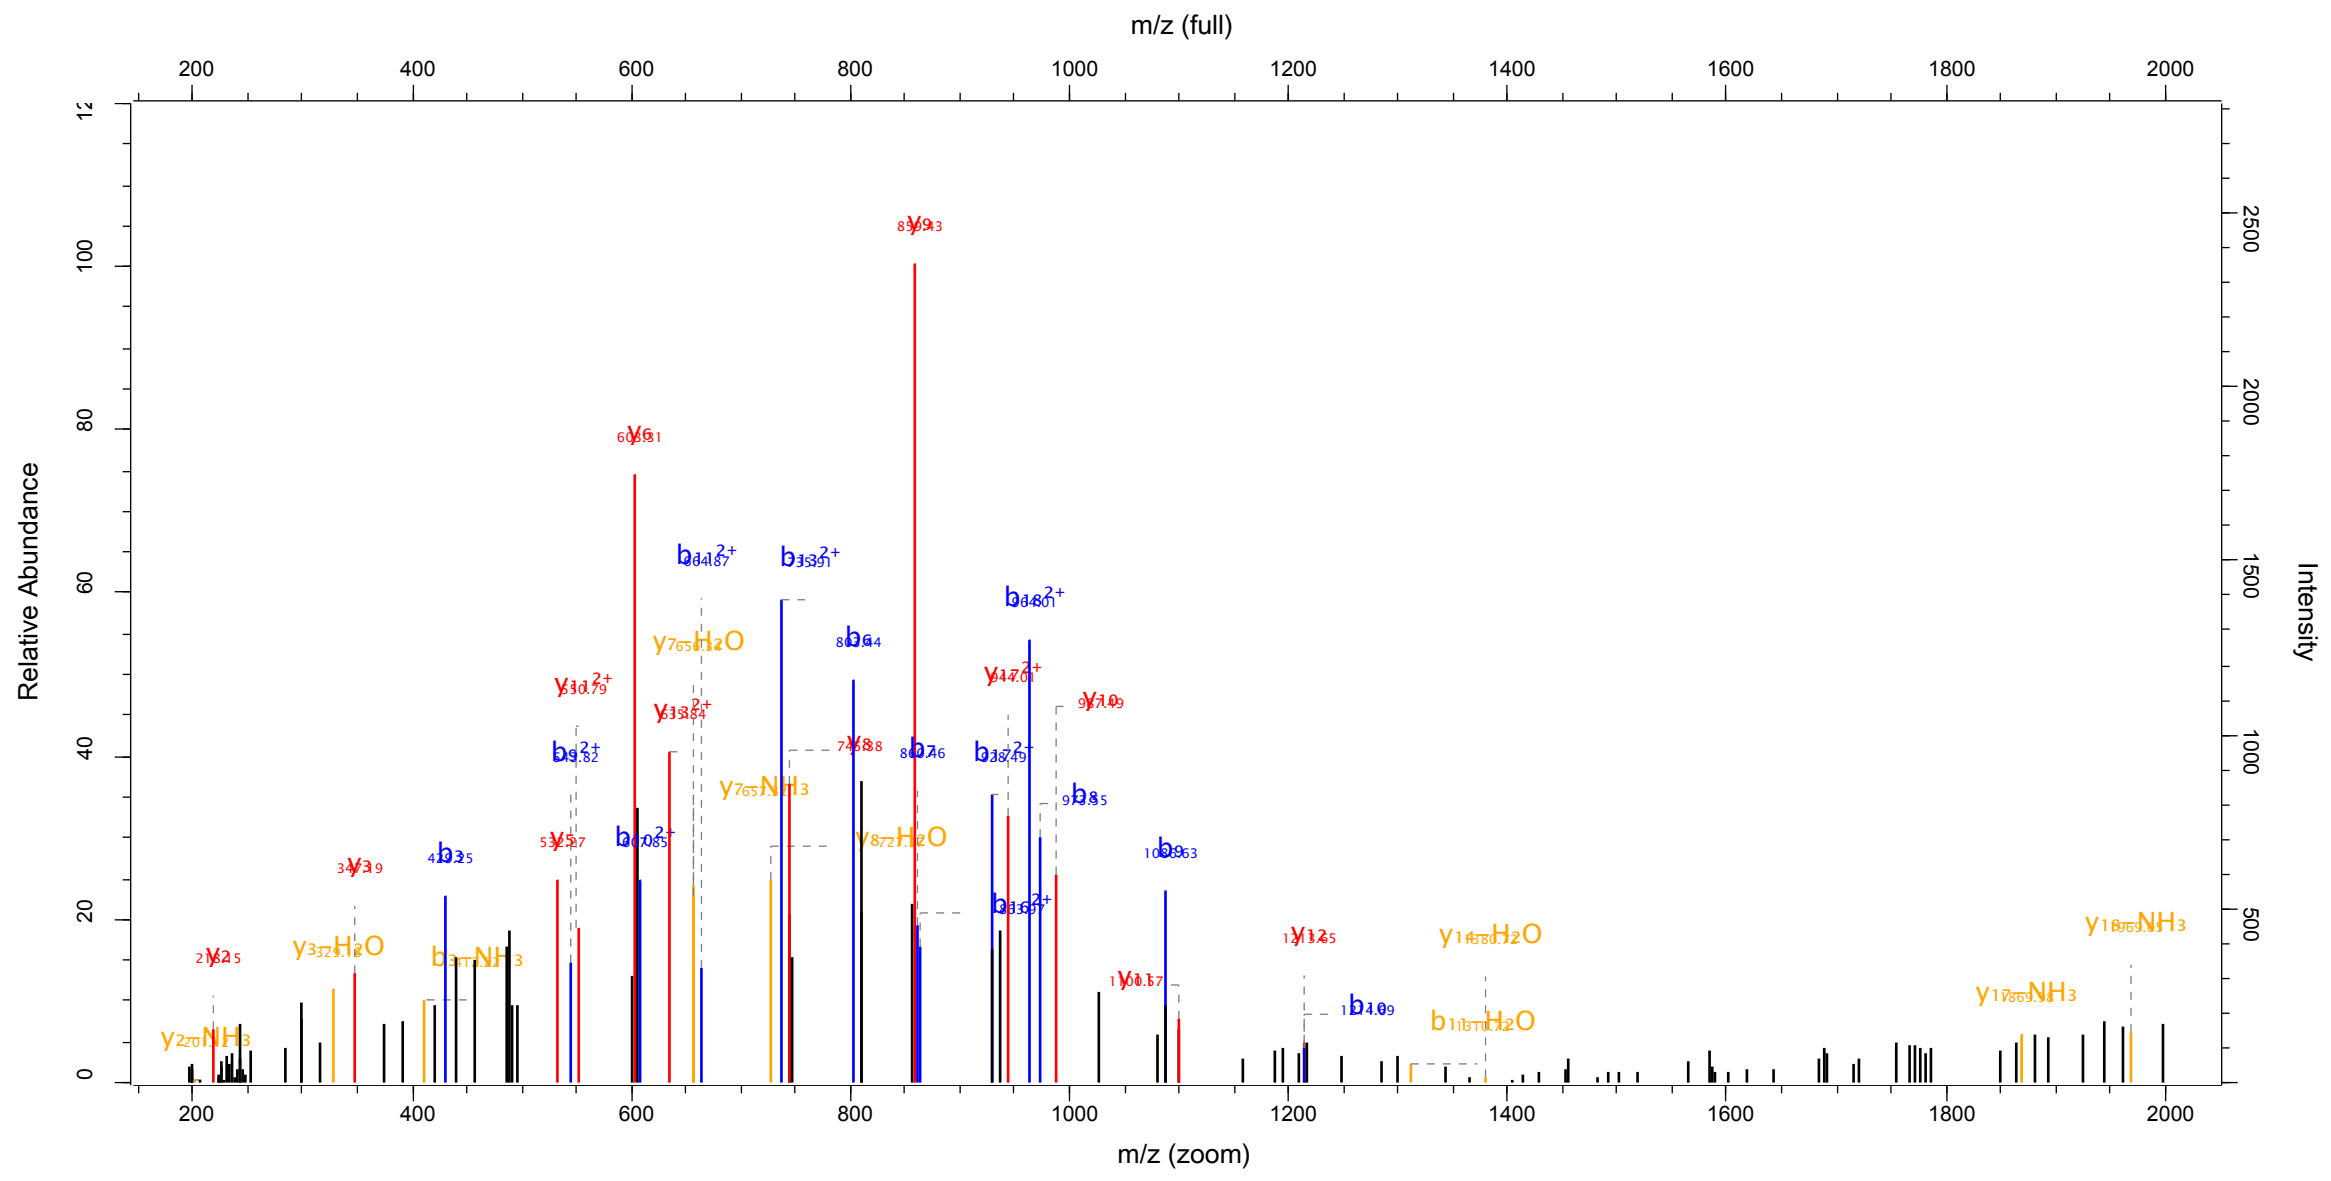

Scan number 23306 Raw file nak\_ubx4LightSAX5\_11 nov05  
 Method ITMS; CID Pepti... 156.36

GlyGly Site Id 42

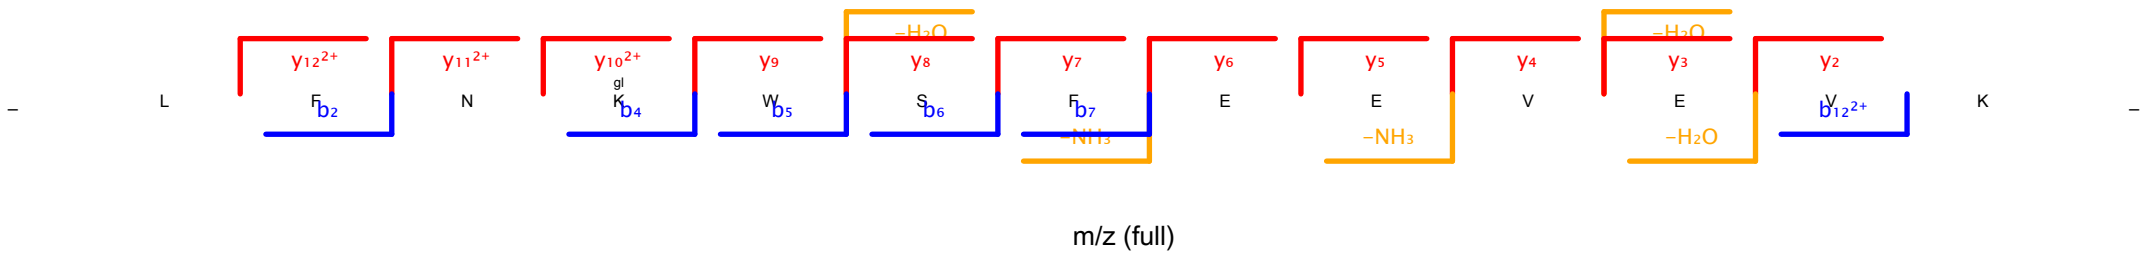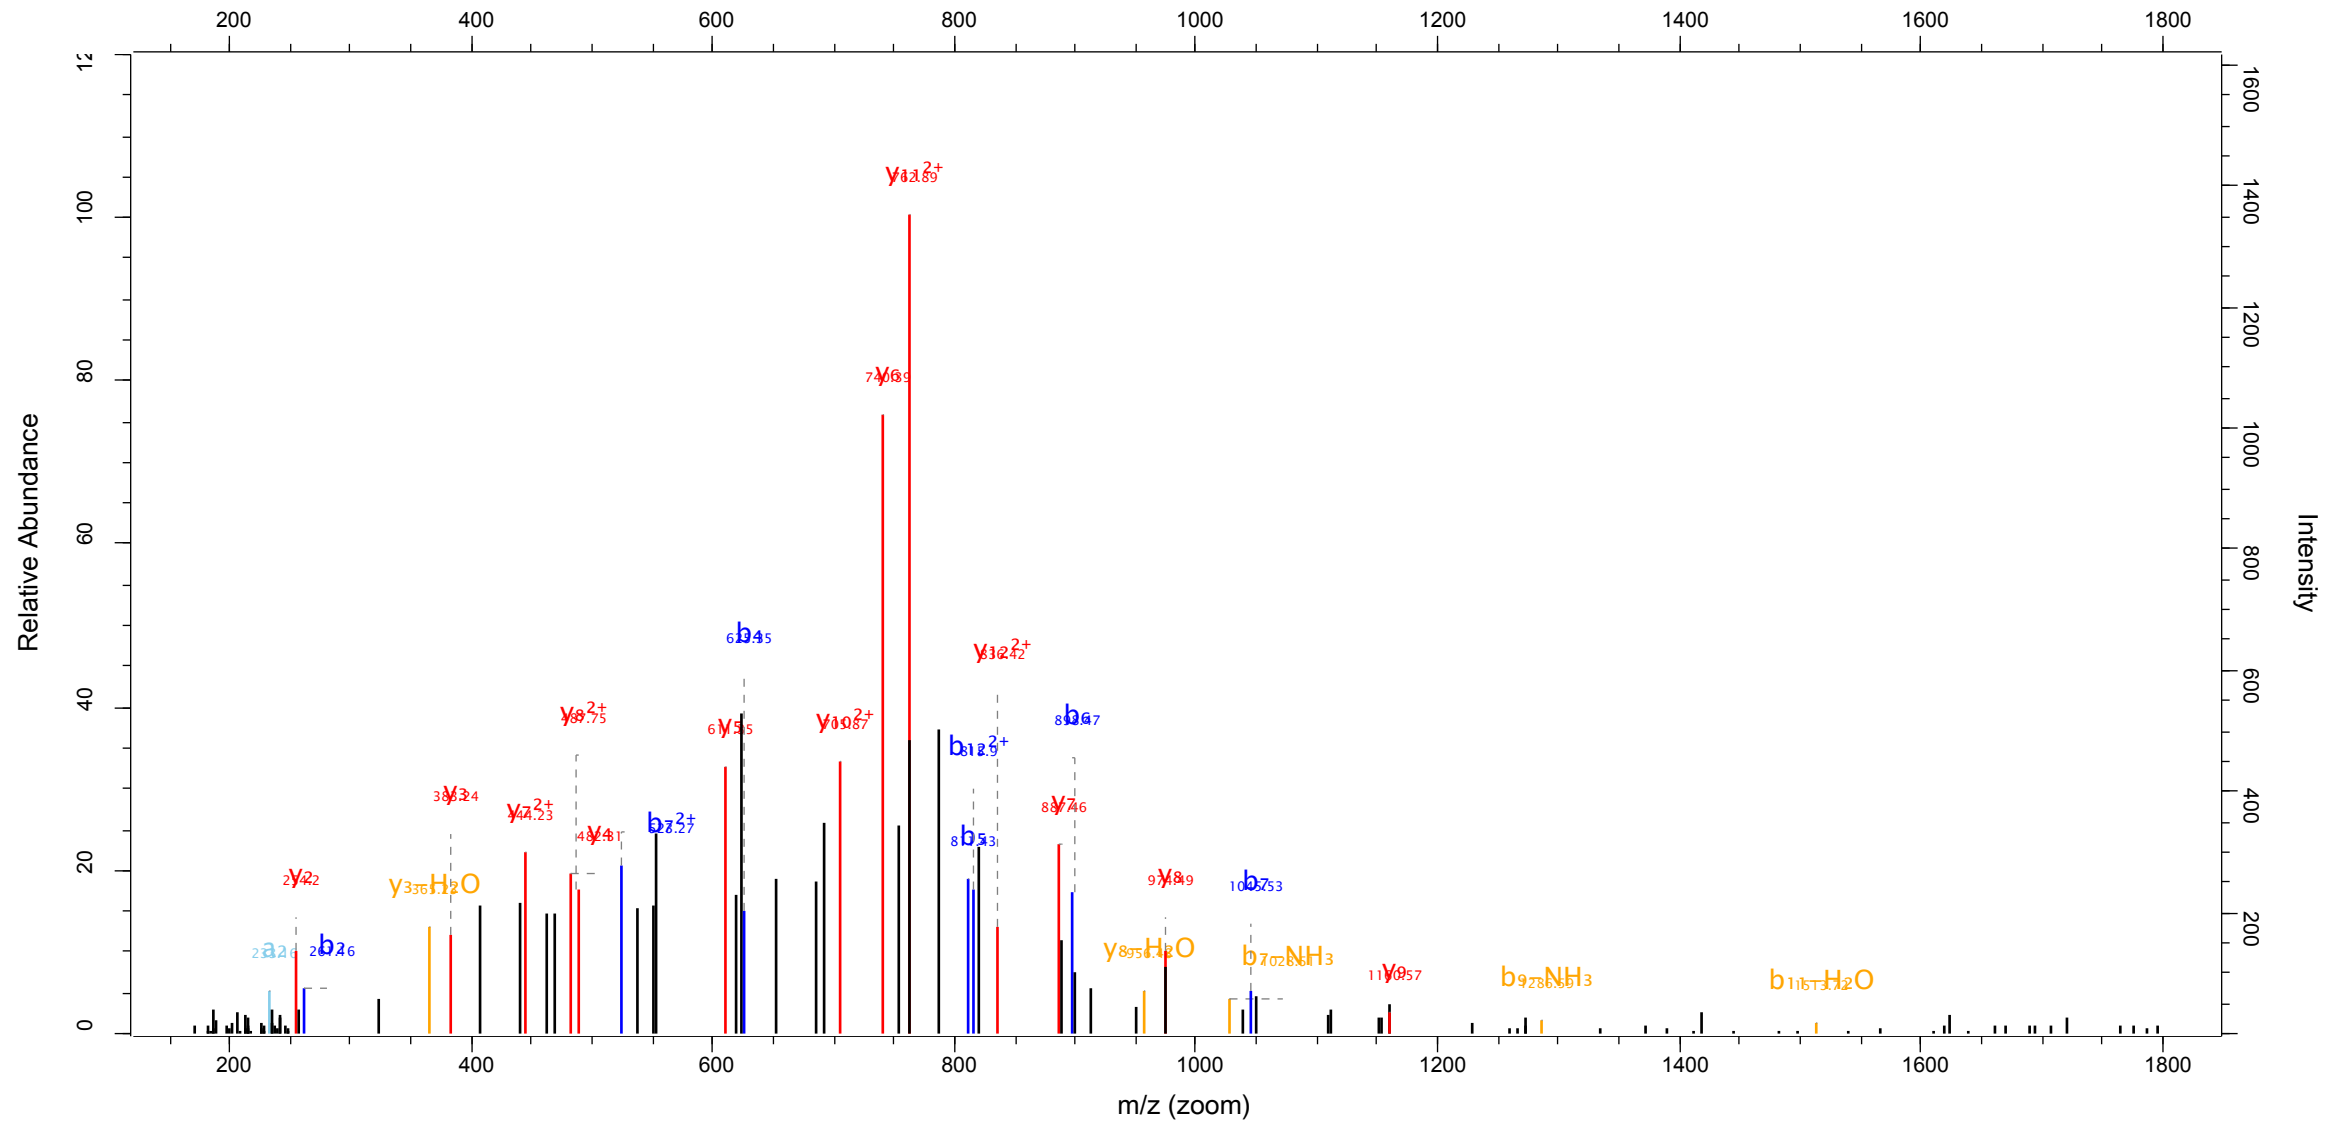



Scan number 32480 Raw file nak\_UBX2LSAX4\_8feb11\_04  
 Method ITMS; CID Pepti... 114.96

GlyGly Site Id 43

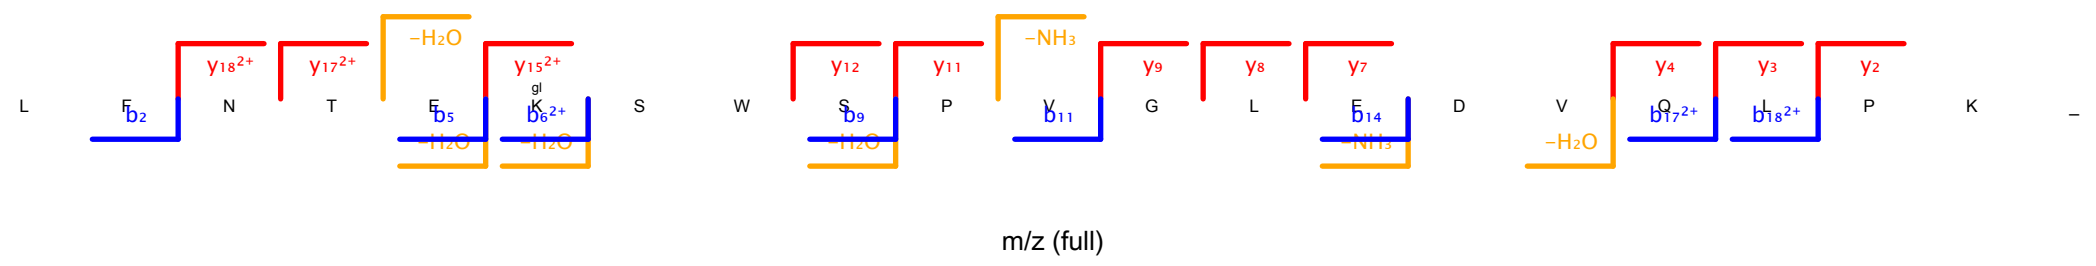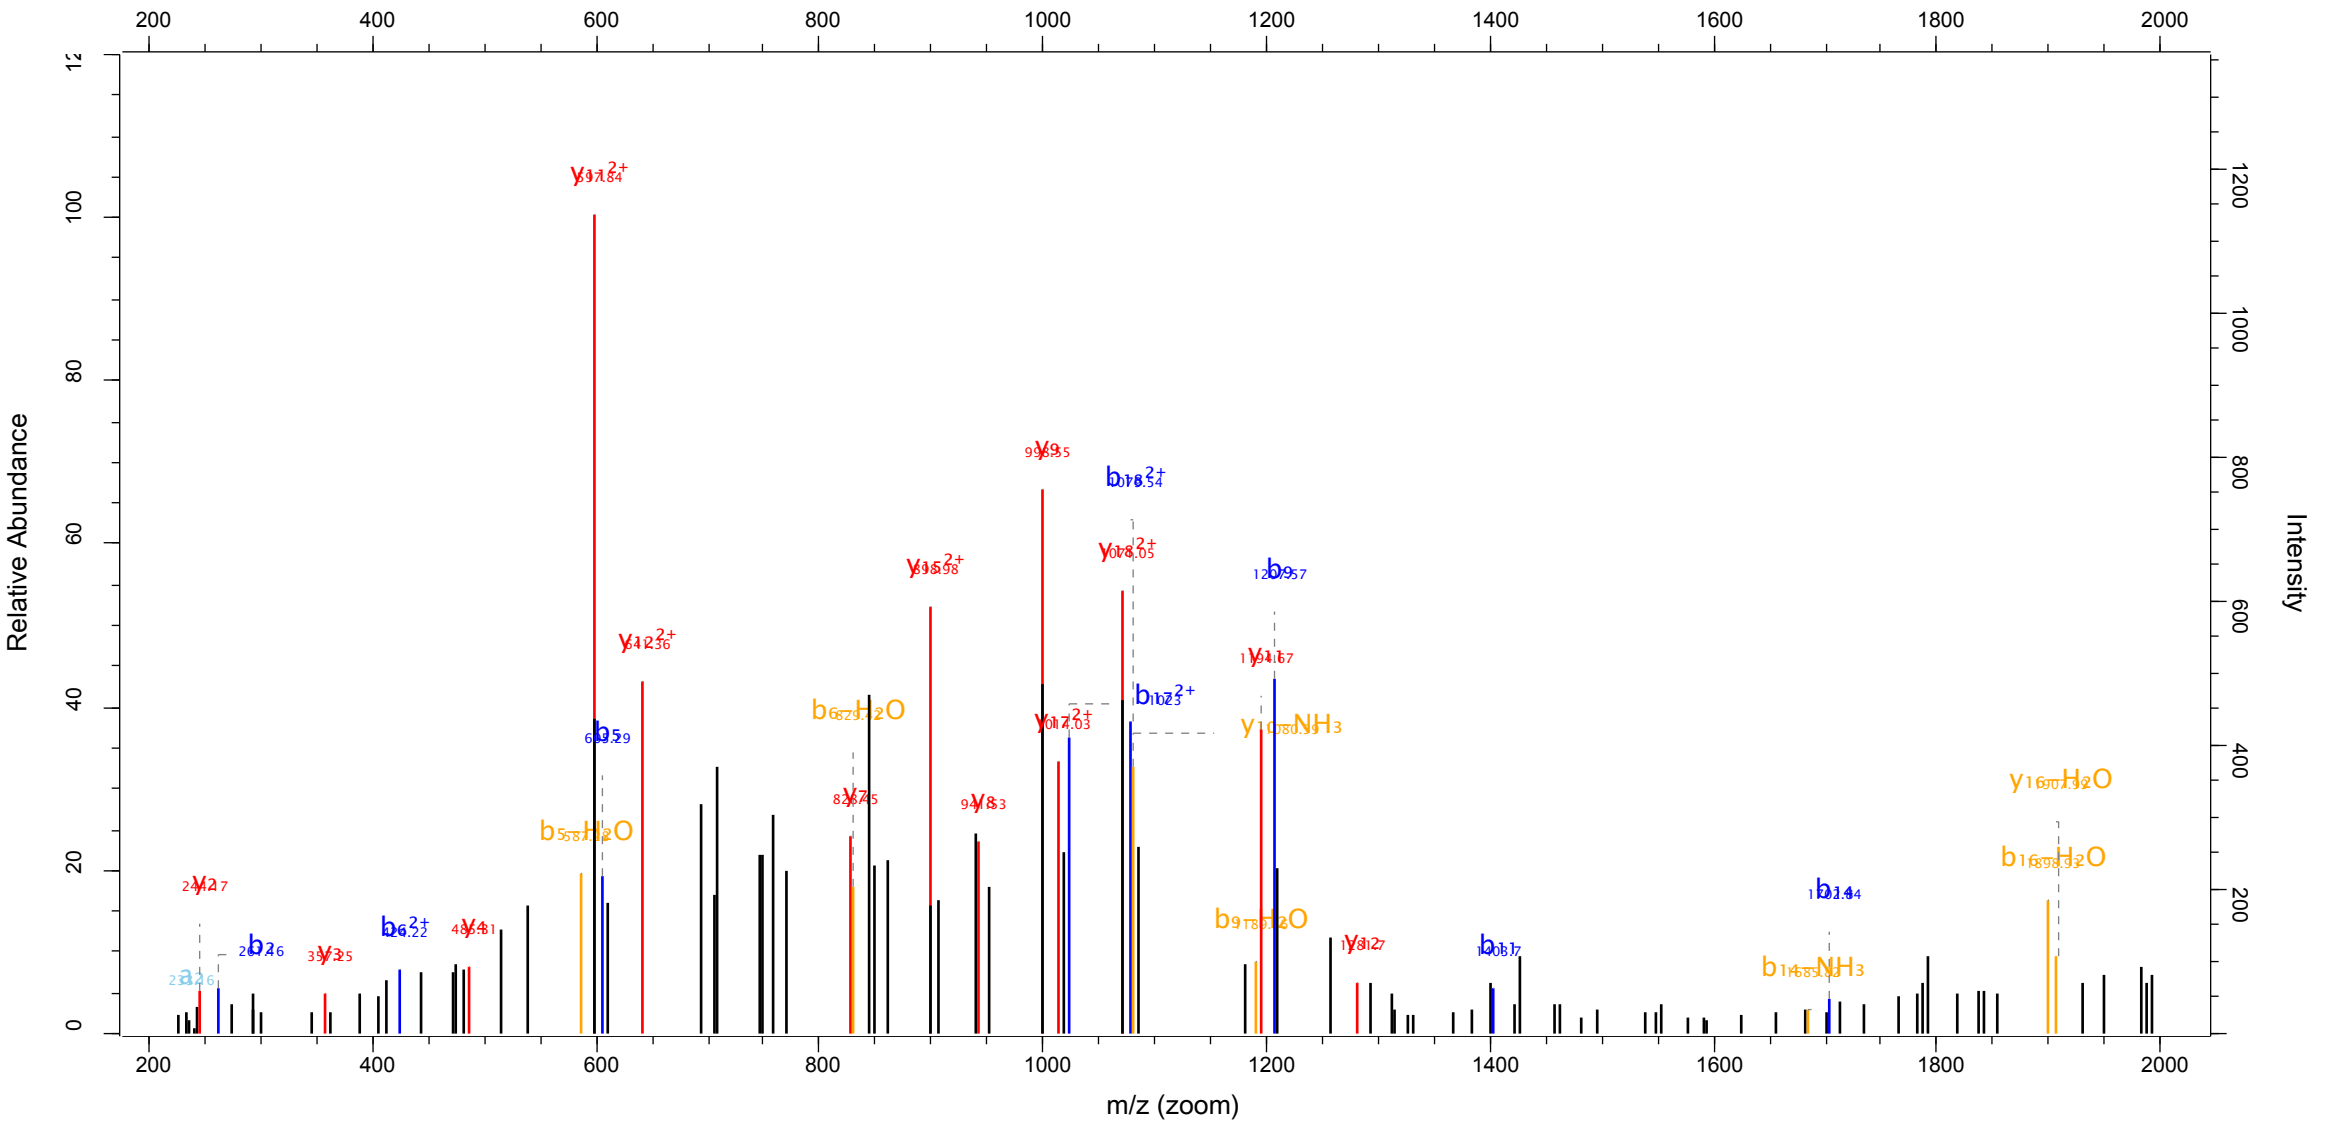

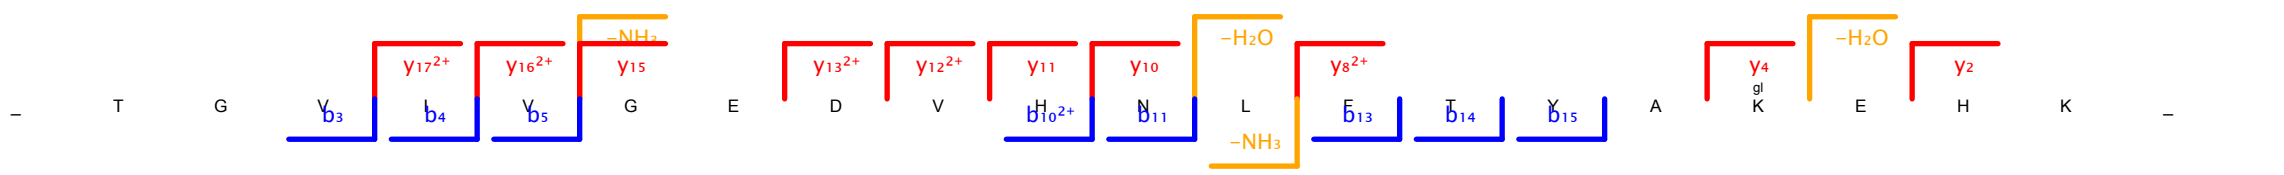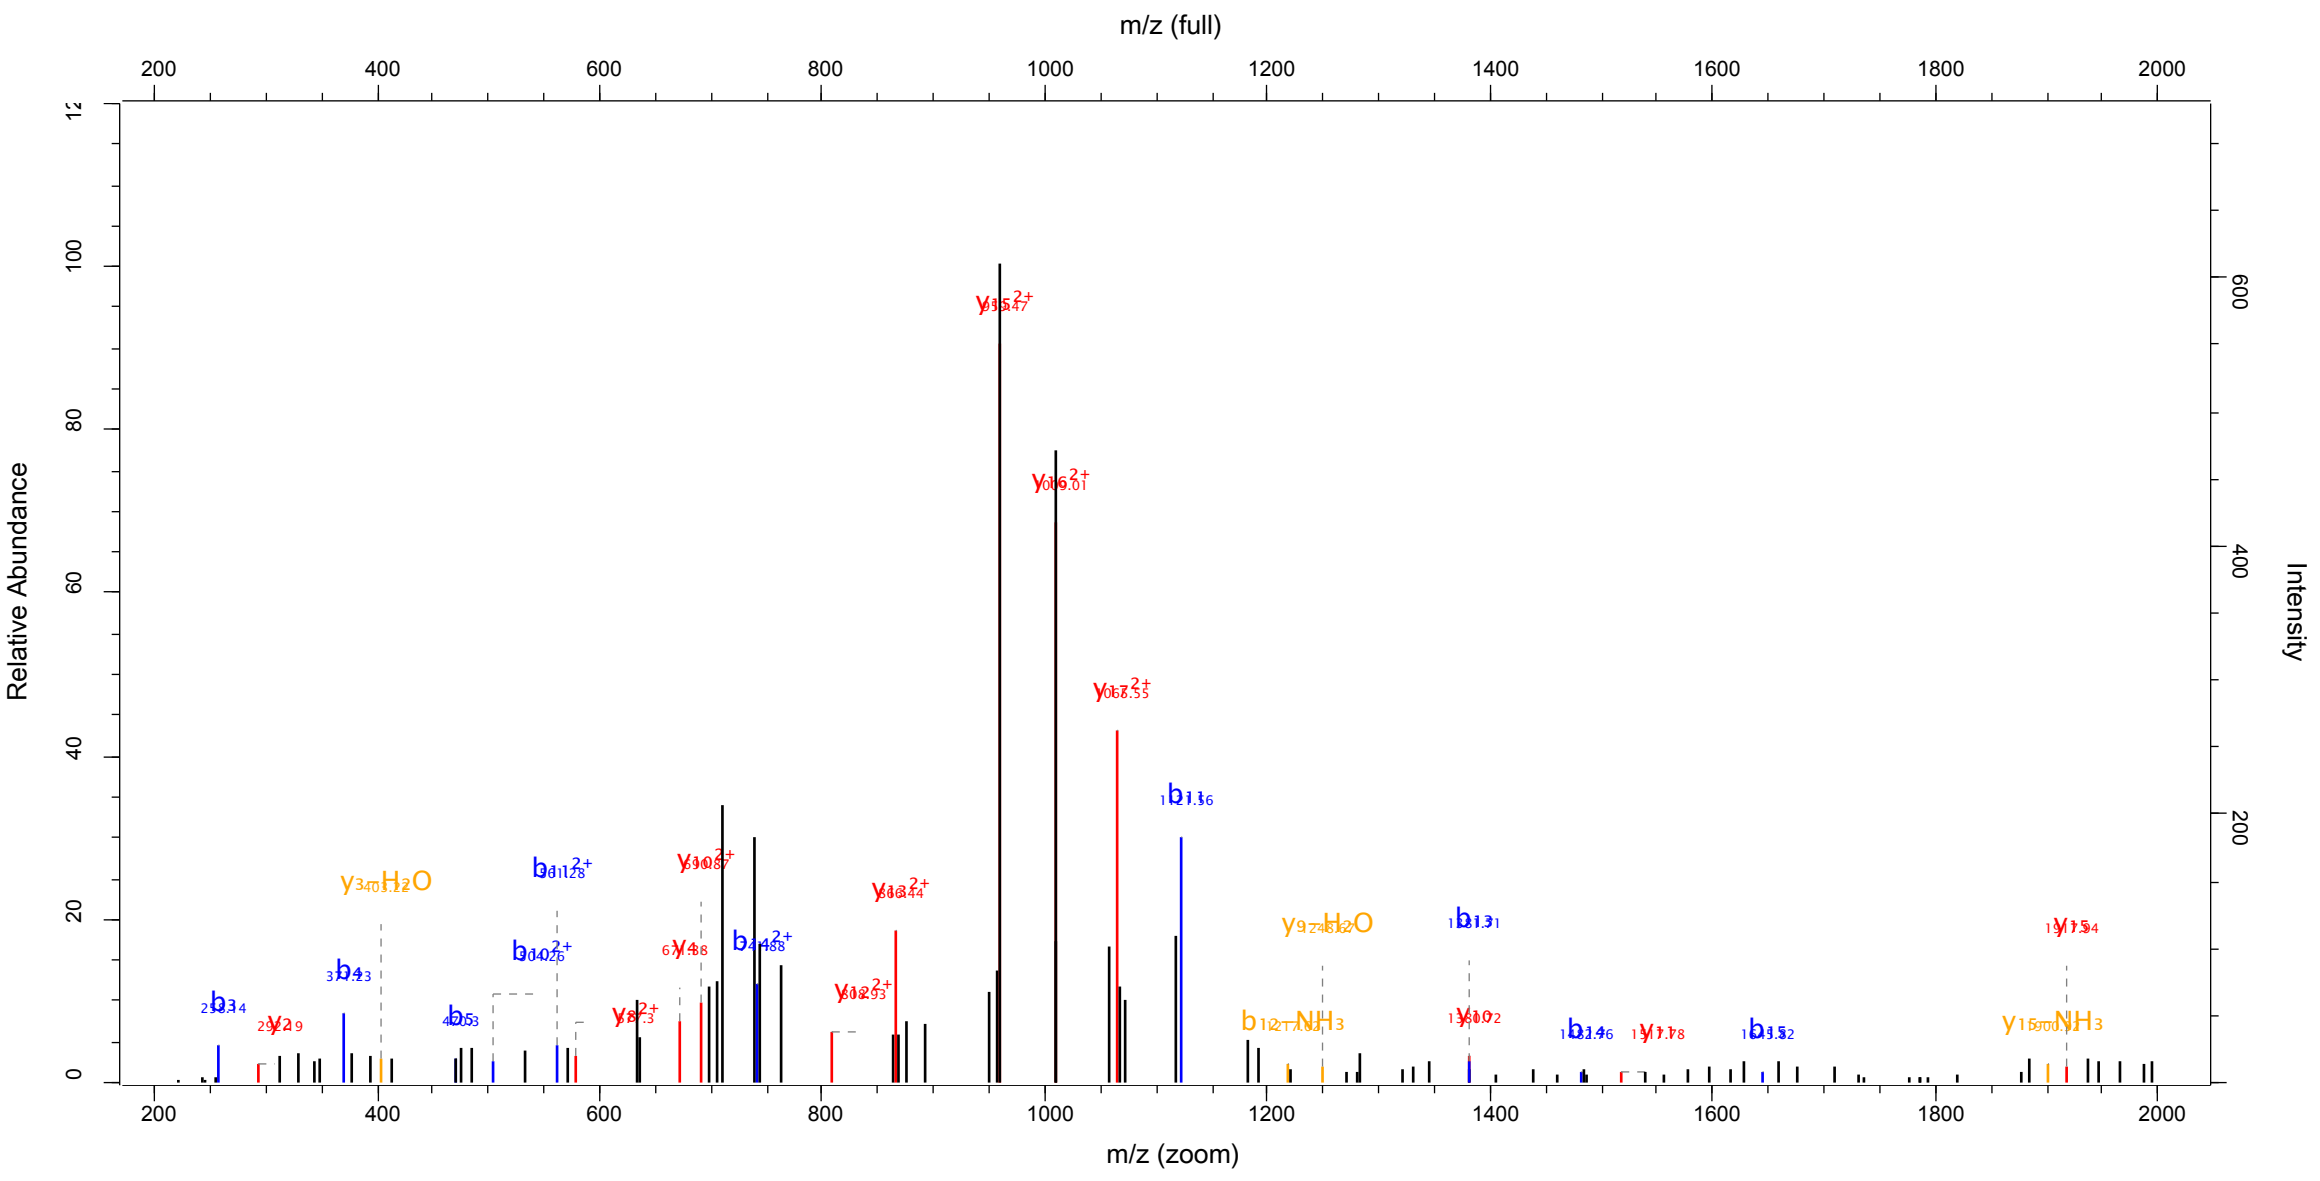

Scan number 30507 Raw file nak\_ubx4HeavySAX2\_11nov07  
 Method ITMS; CID Pepti... 56.77

GlyGly Site Id 45

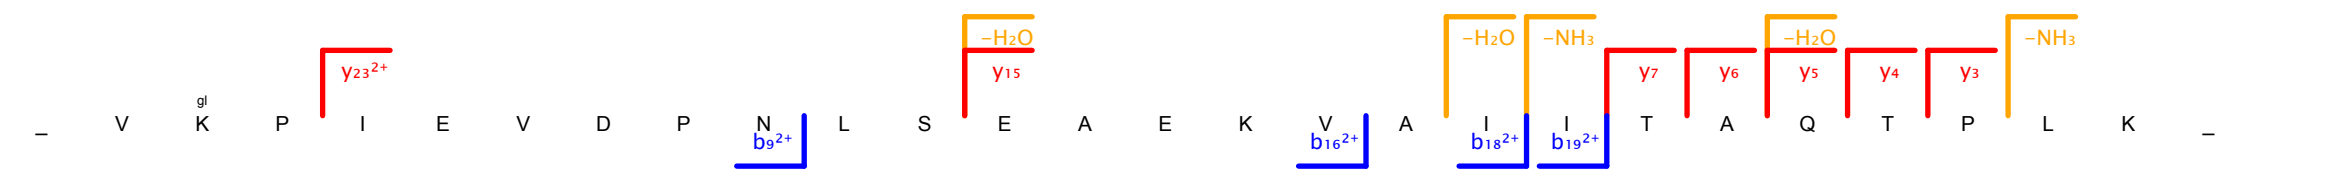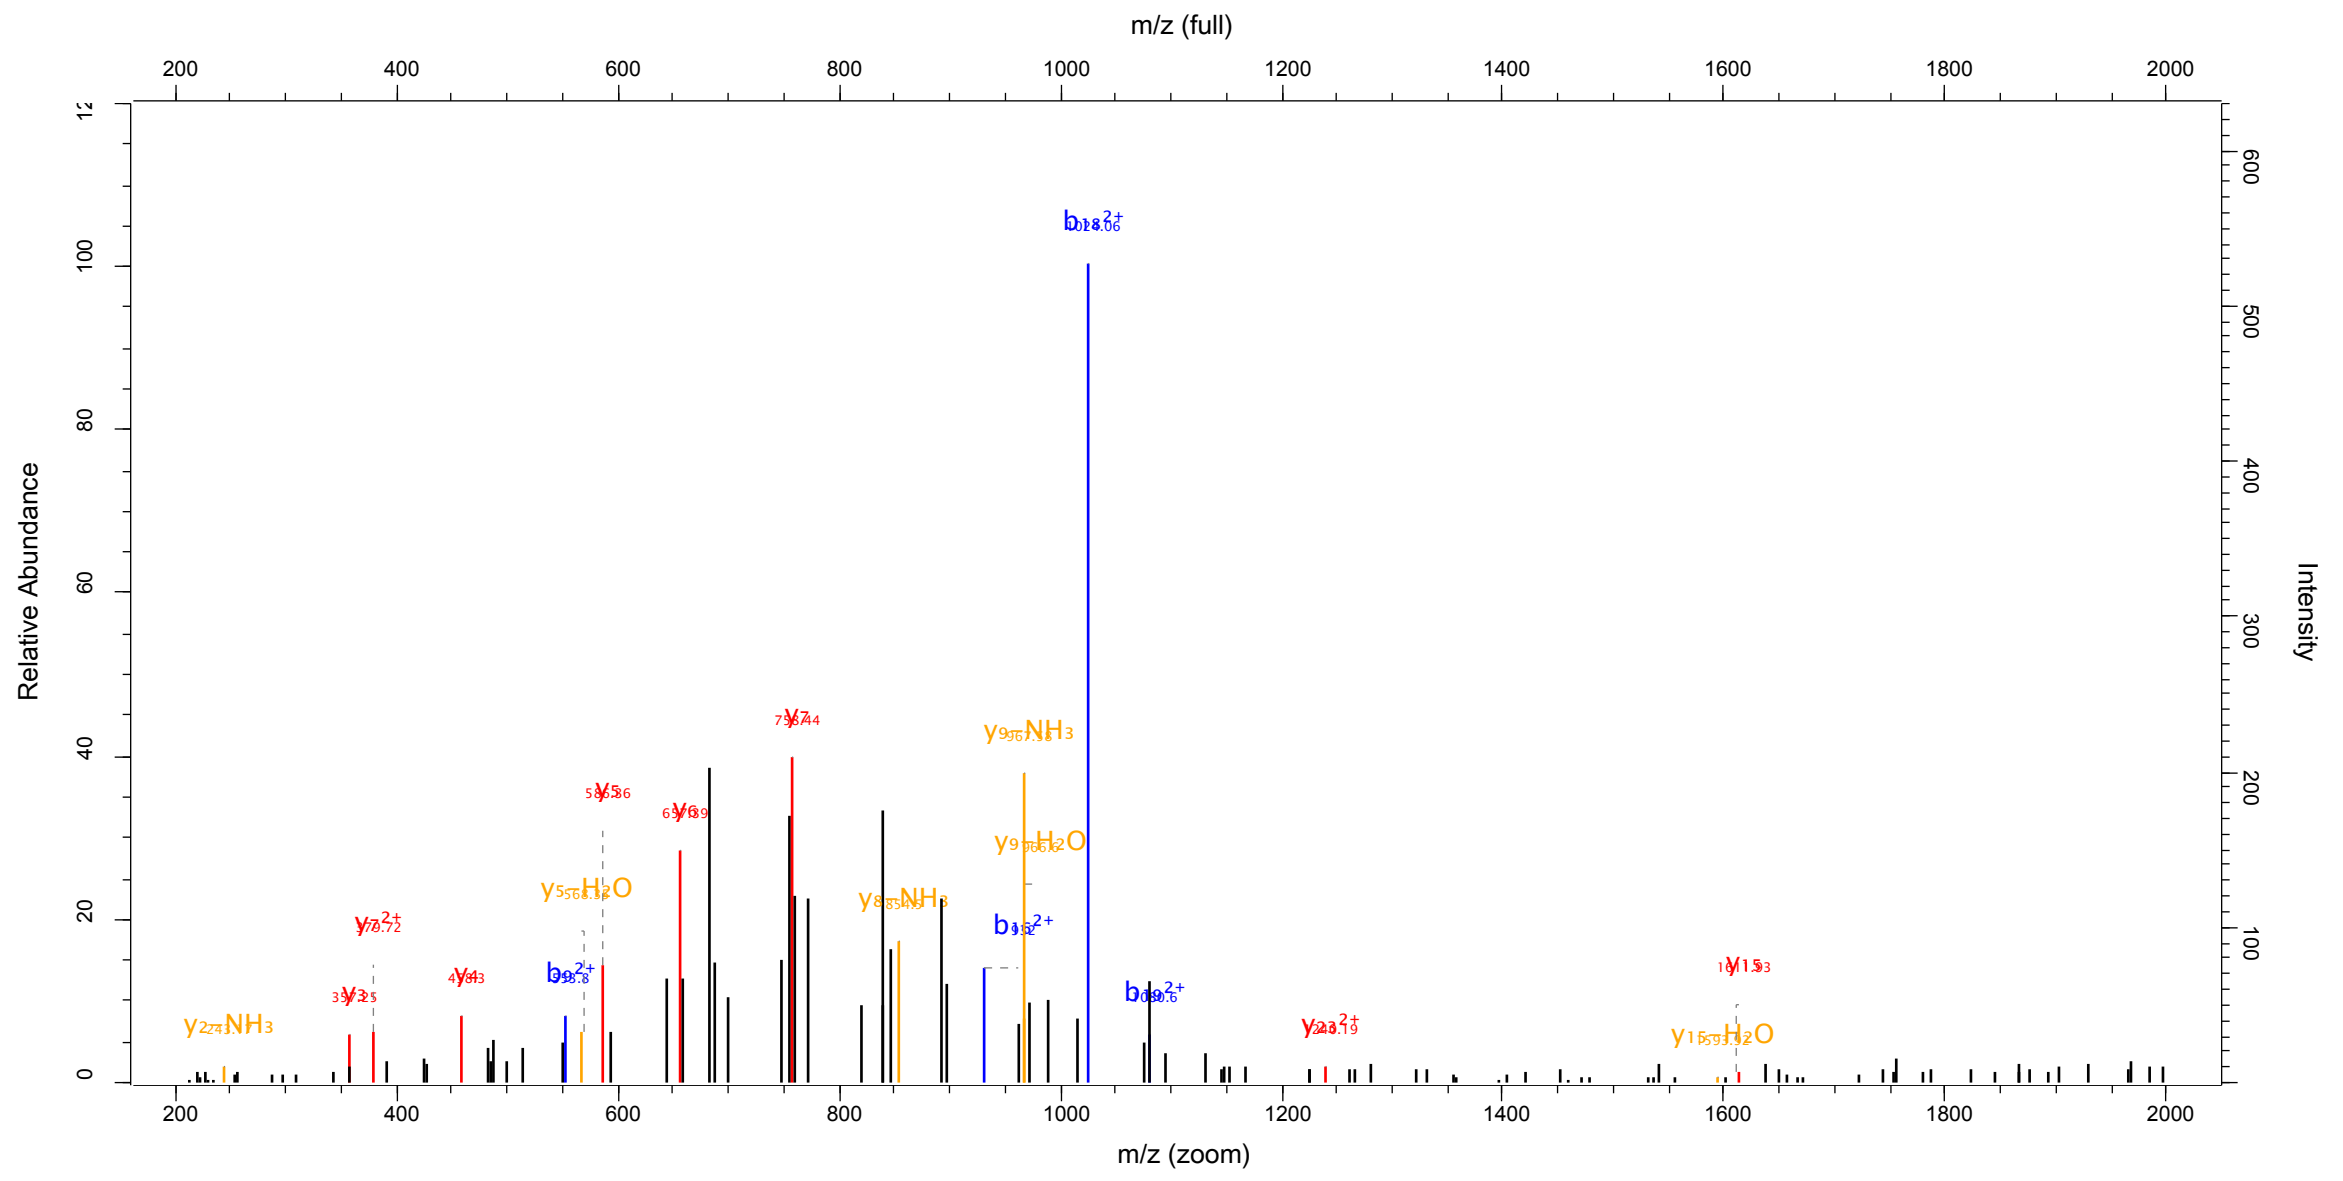

Scan number 17678 Raw file nak\_UBX2LSAX6\_8feb11\_06  
 Method ITMS; CID Pepti... 135.68

GlyGly Site Id 46

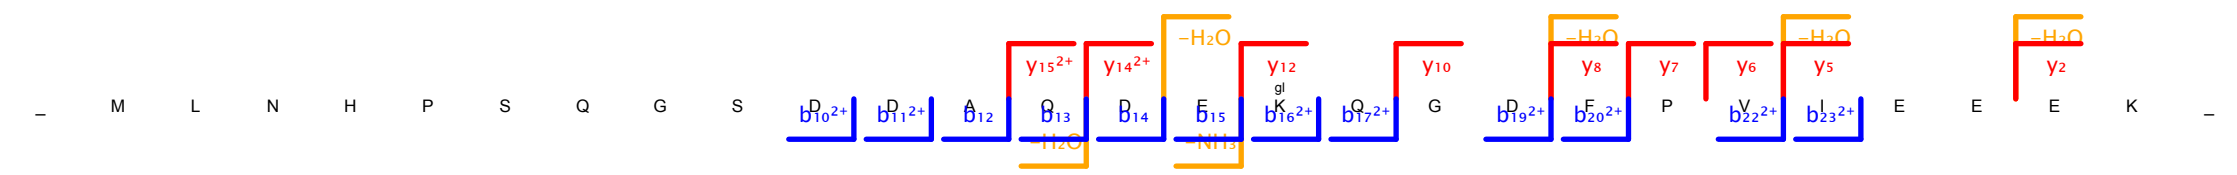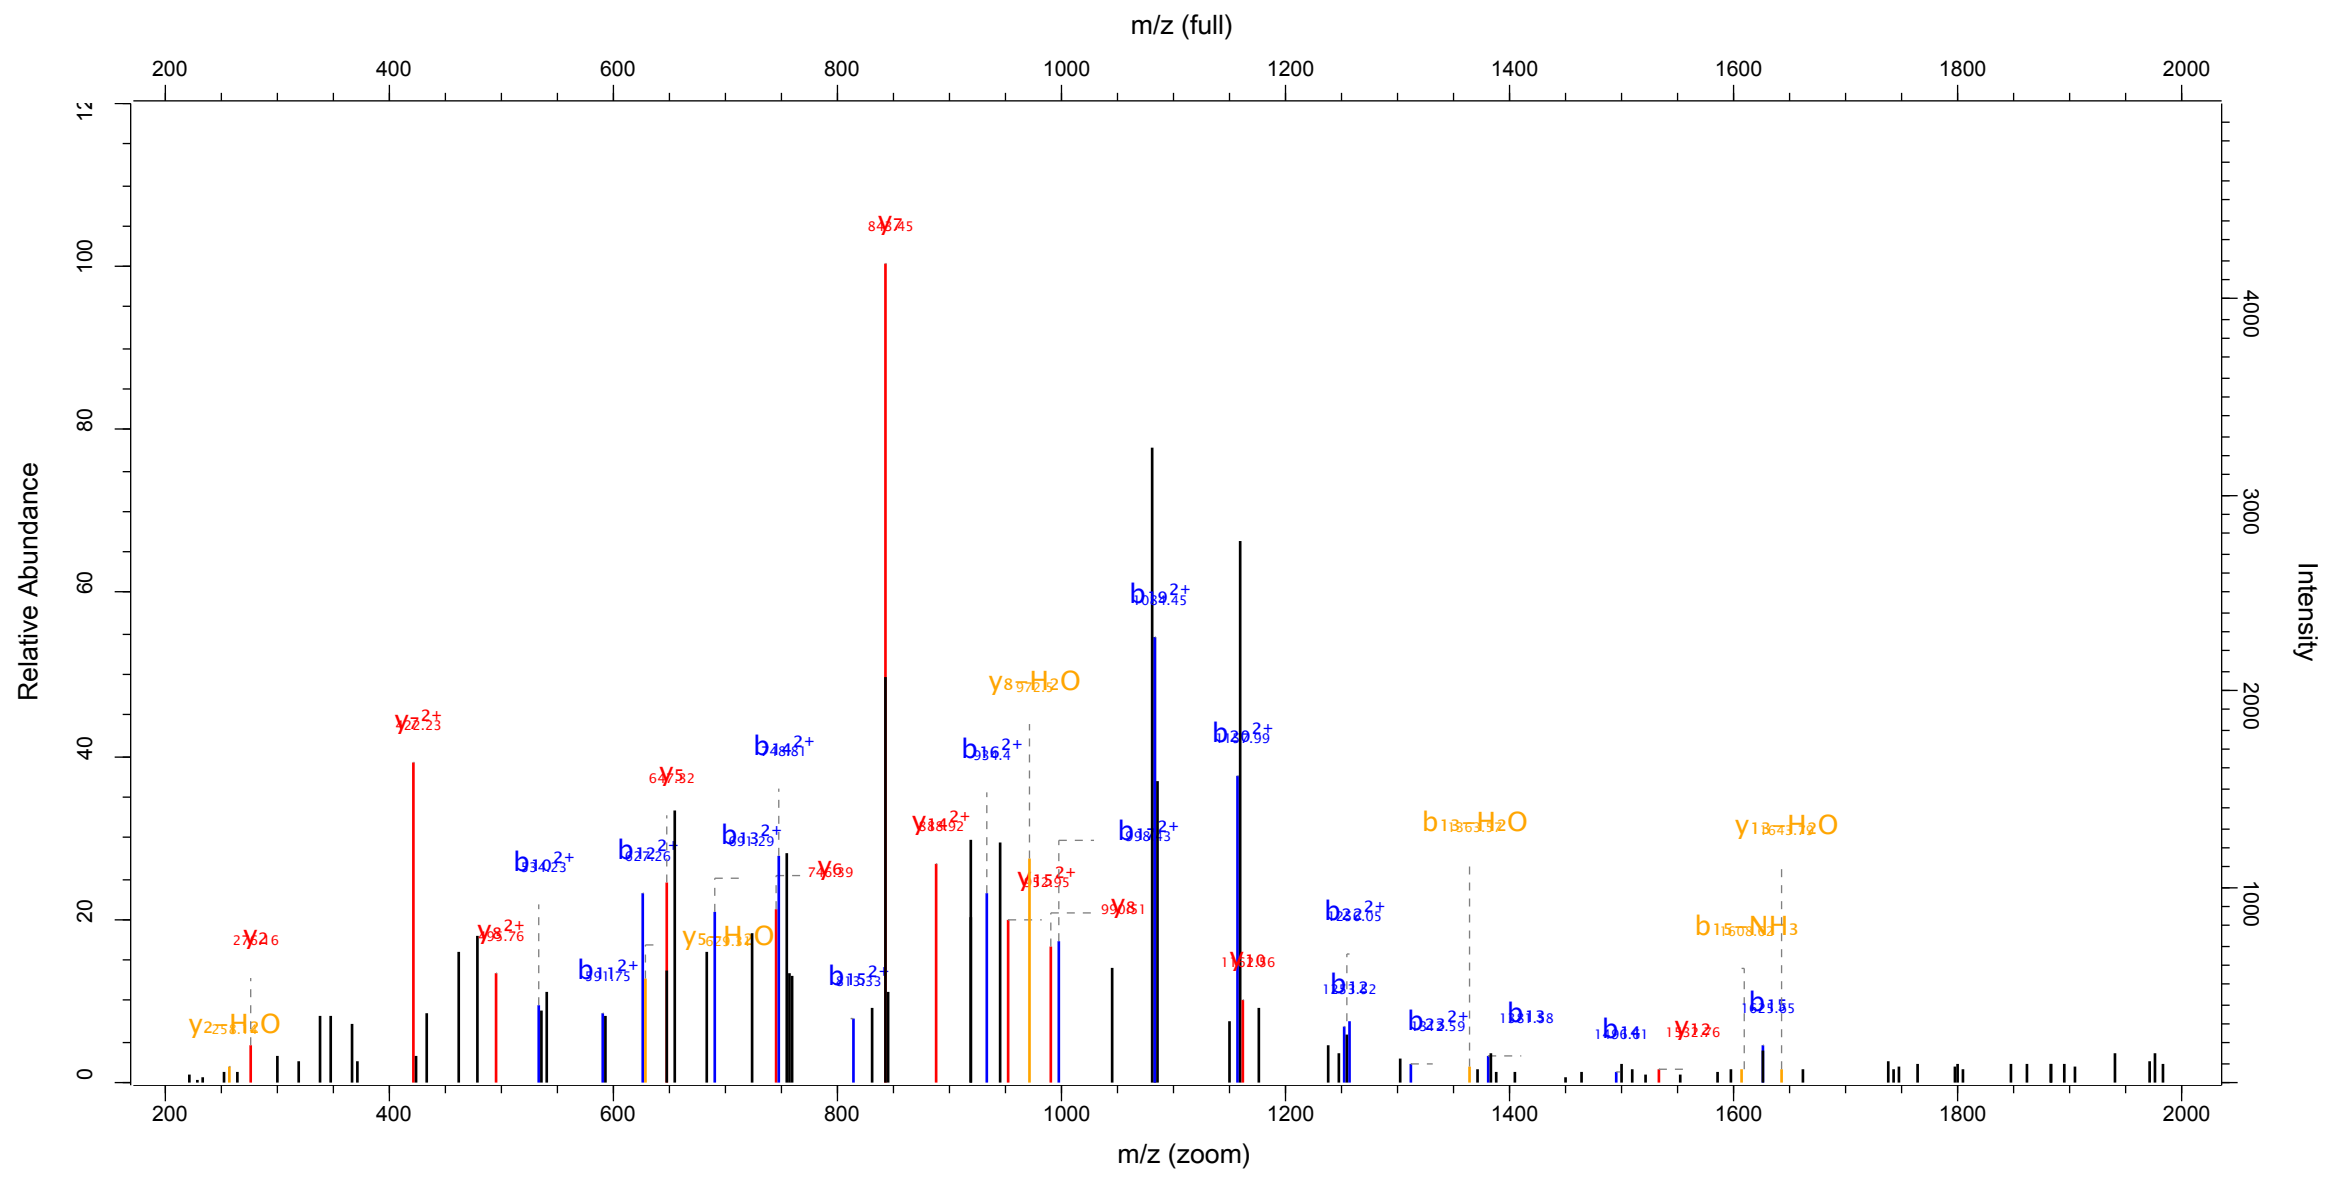



Scan number 28985 Raw file nak\_ubx4LightSAX1\_11nov01  
 Method ITMS; CID Pepti... 262.36

GlyGly Site Id 48

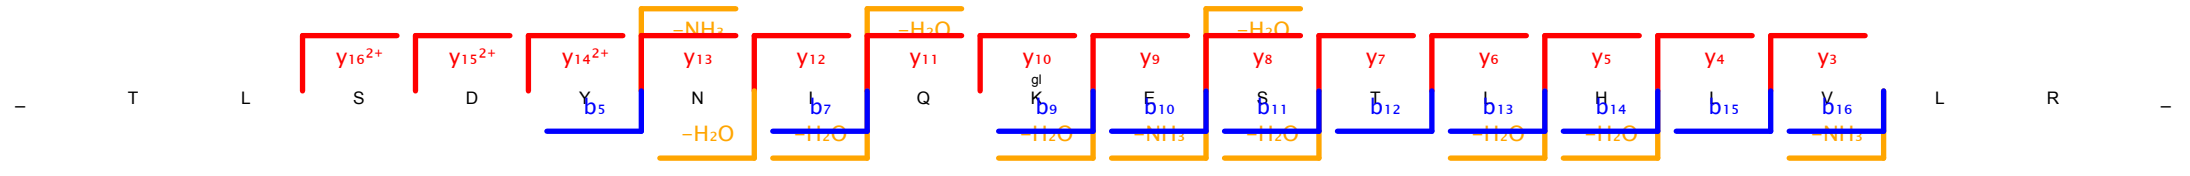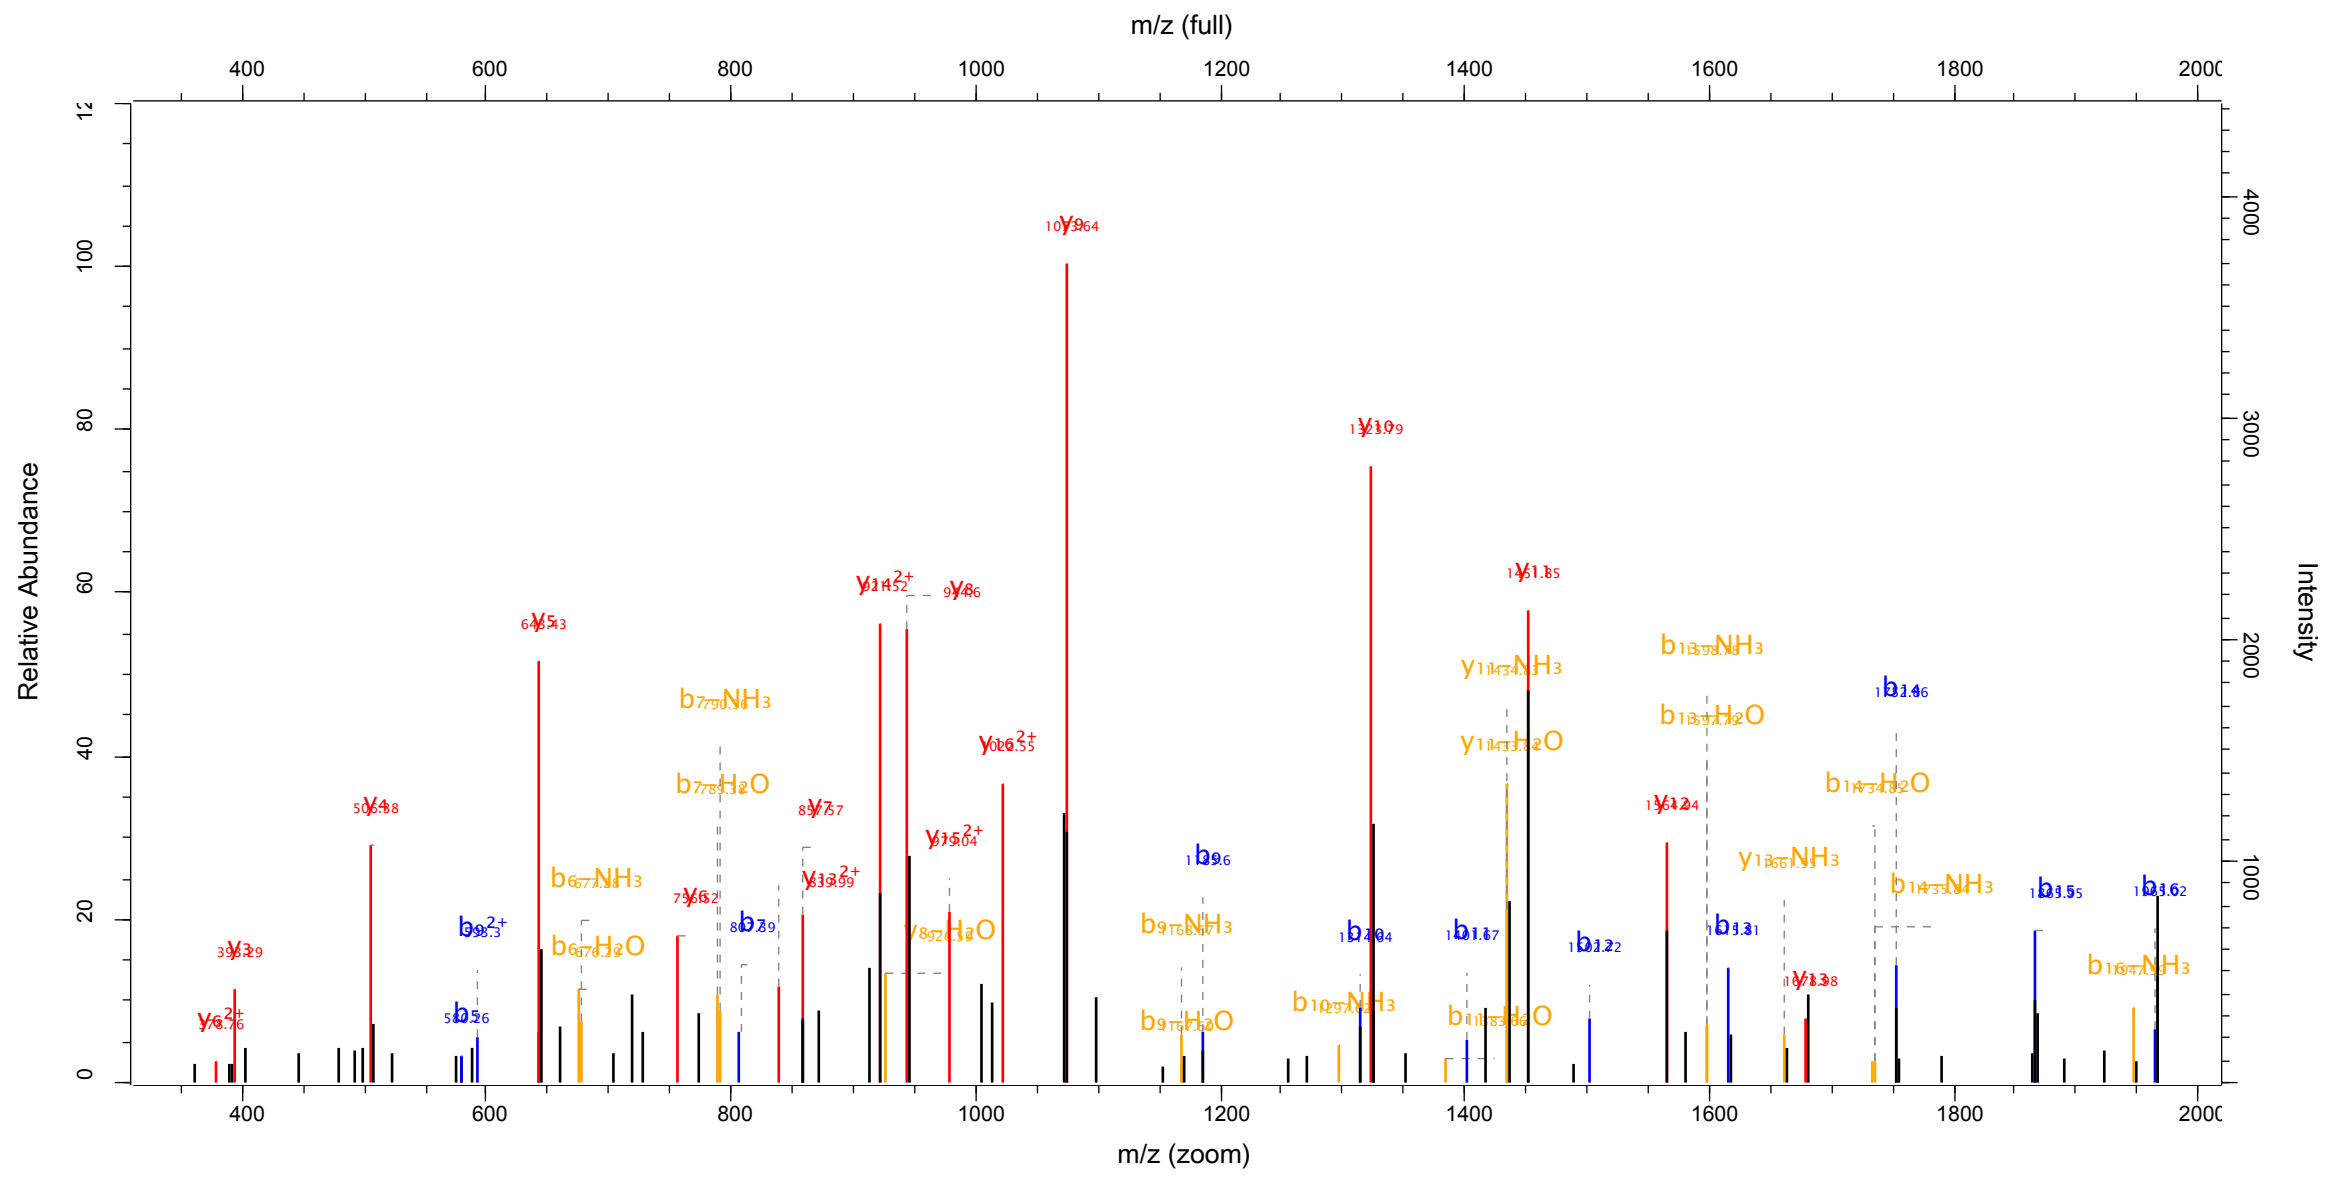

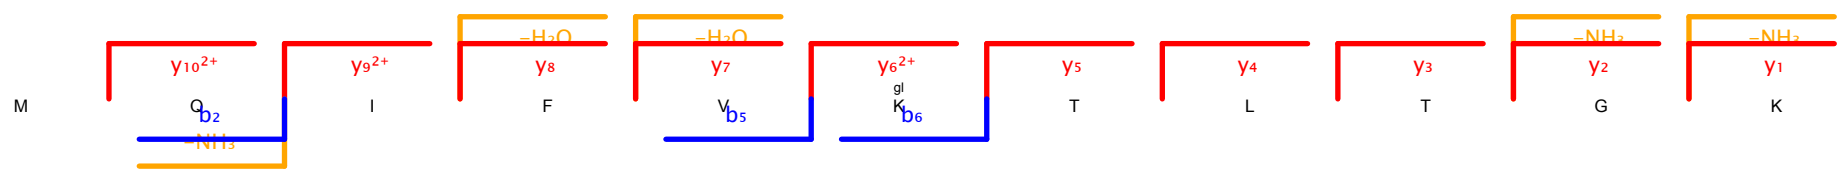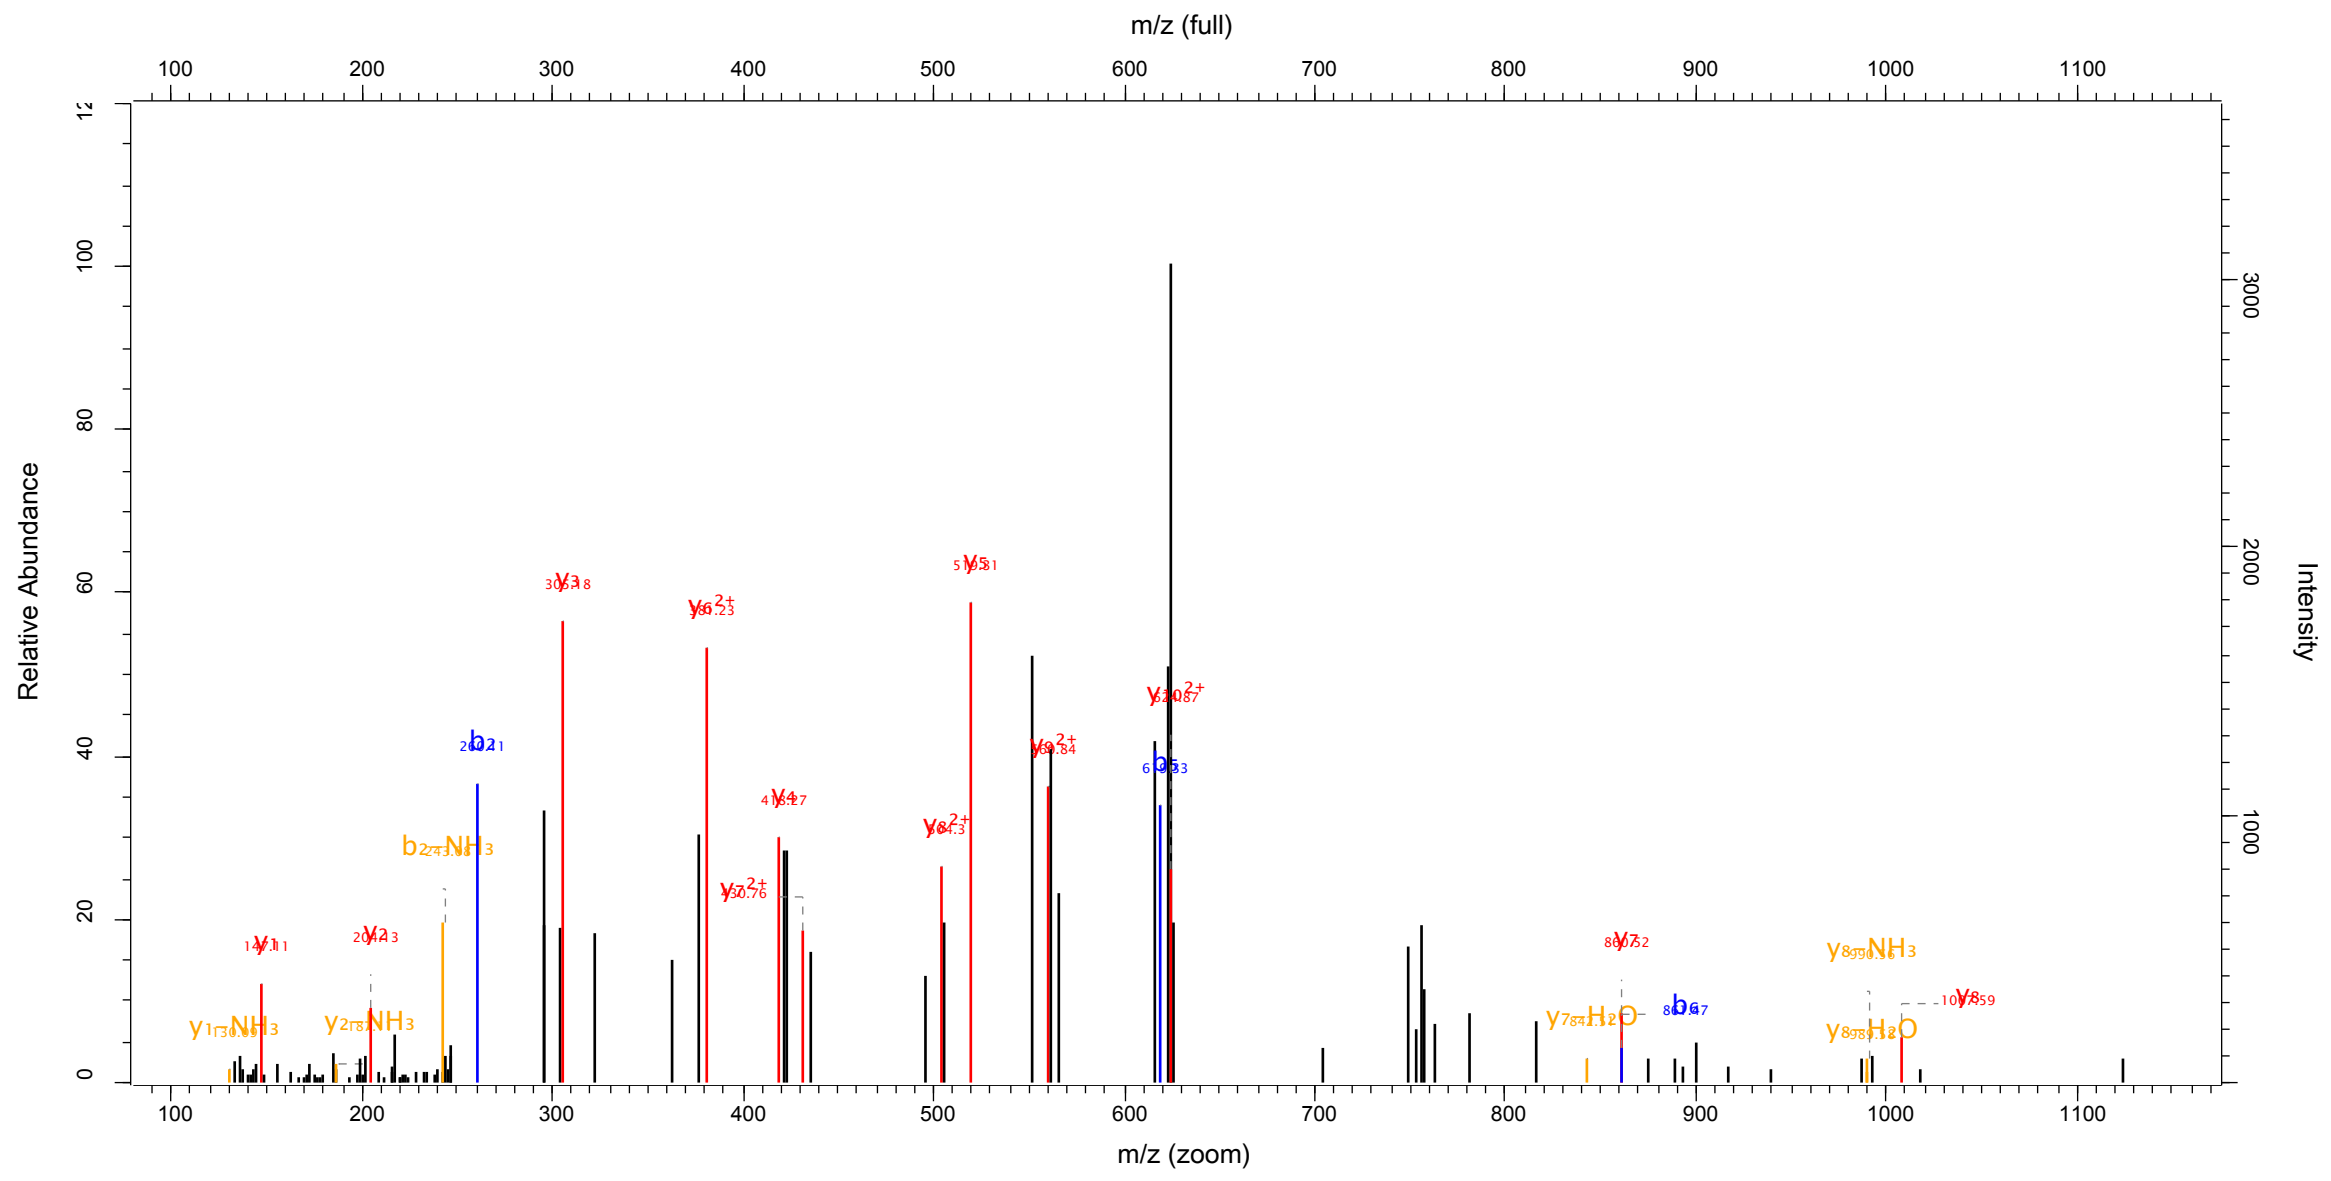

Scan number  
Method

25324  
ITMS; CID

Raw file  
Pepti...

nak\_cdc48UbconjugatesSAX3\_14may10\_07  
316.66

GlyGly Site Id 50

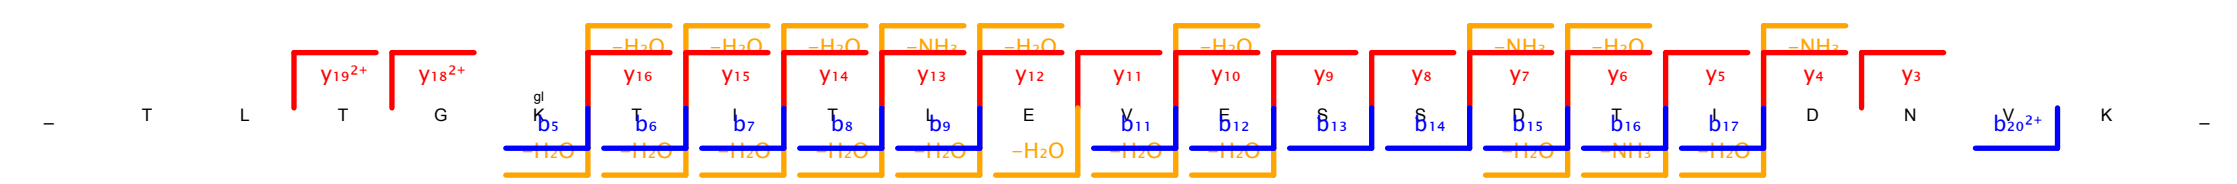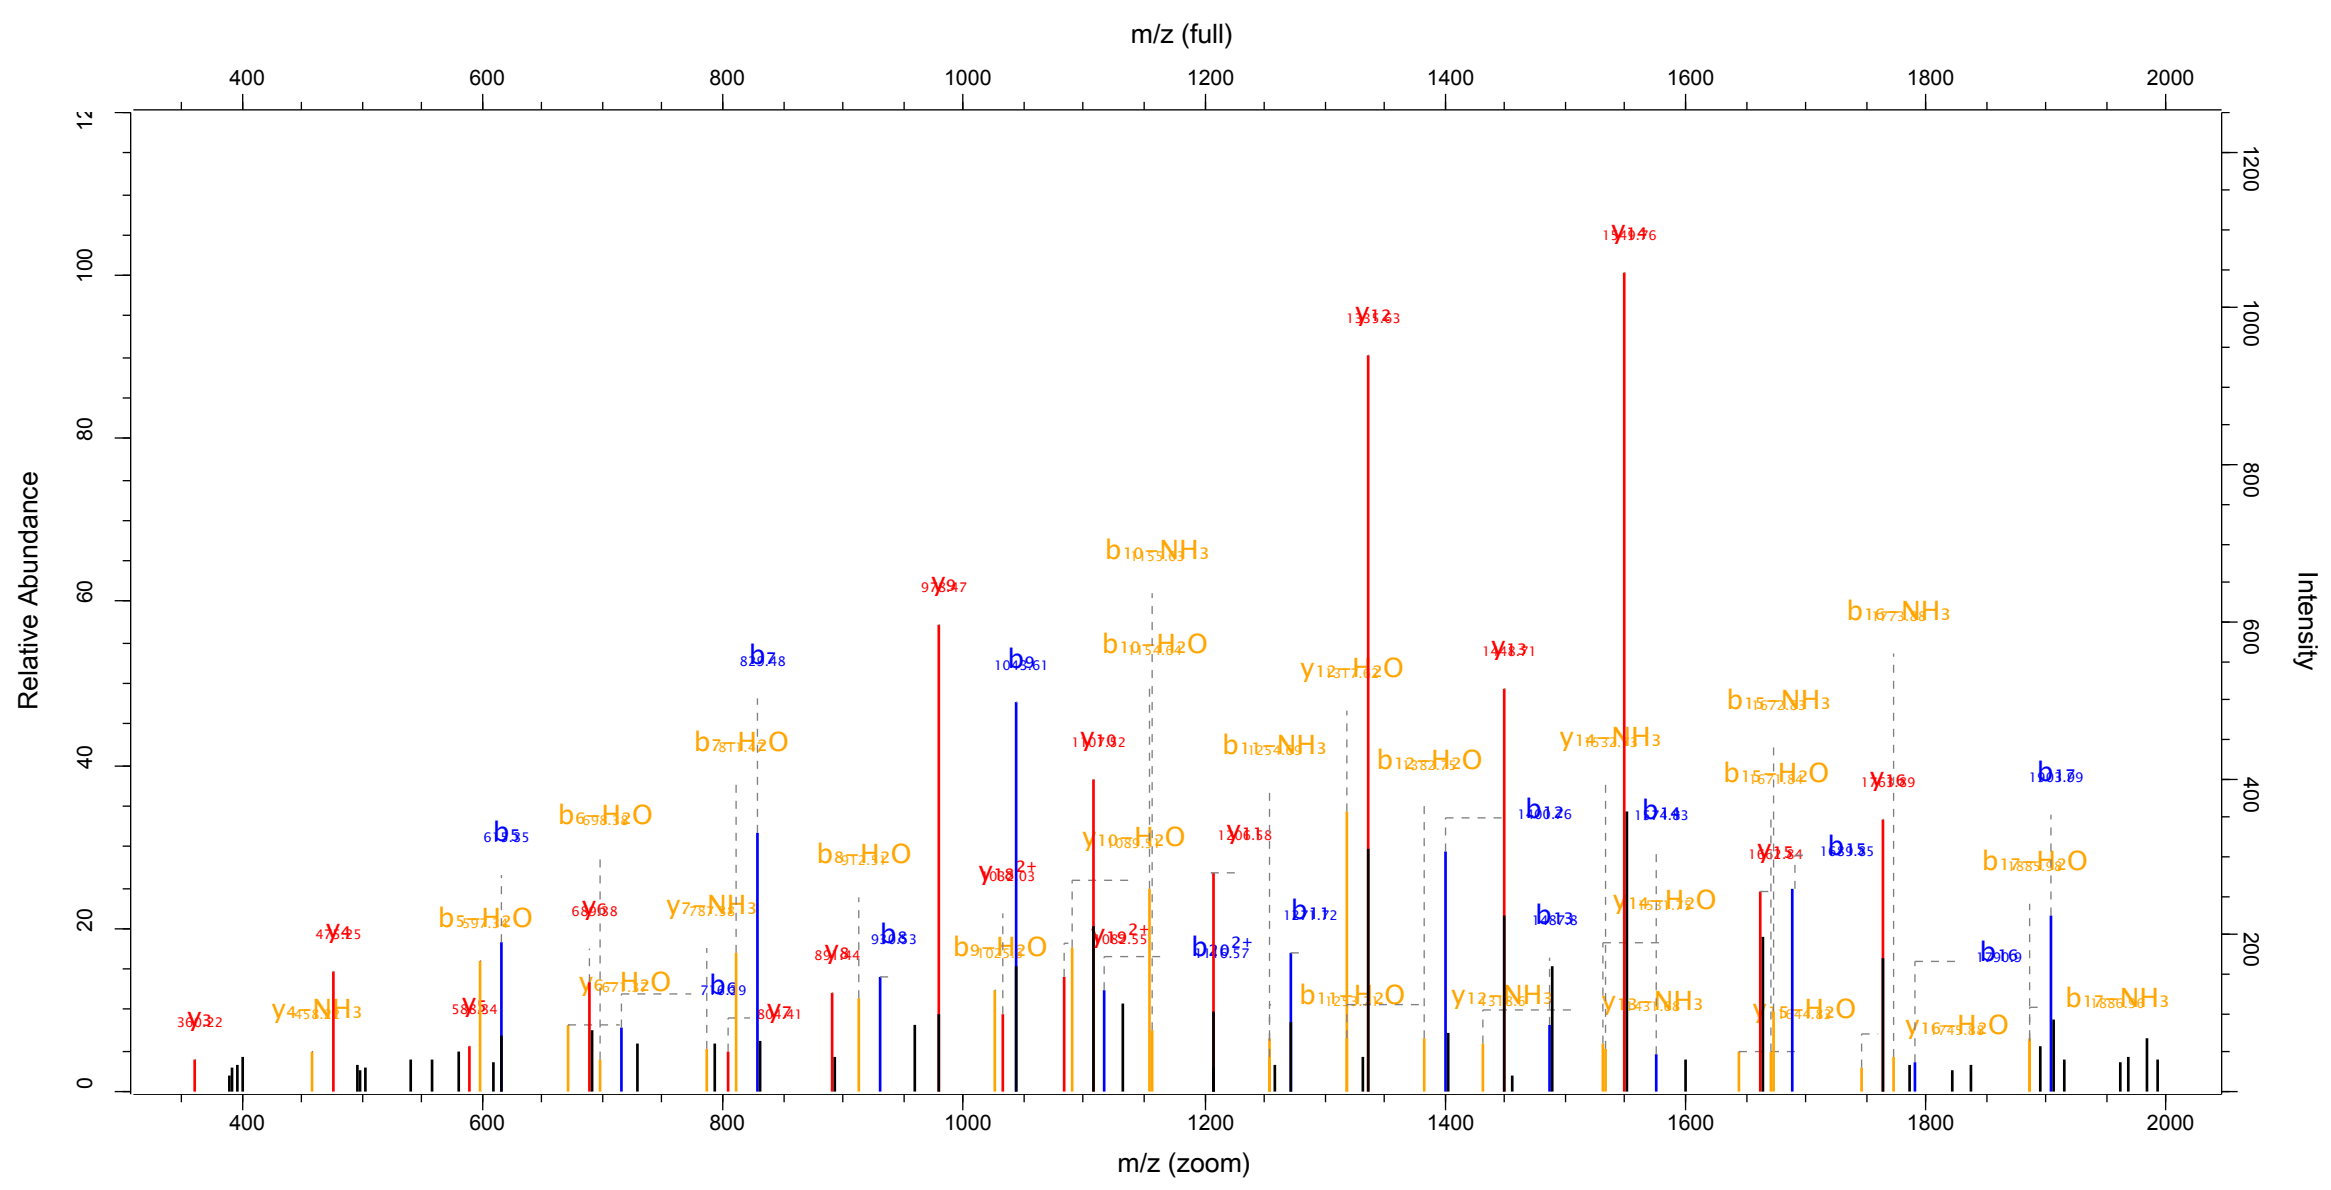



Scan number 5907 Raw file nak\_cdc48UbconjugatecontrolSAX1\_22may10\_10  
 Method ITMS; CID Pepti... 275.83

GlyGly Site Id 51

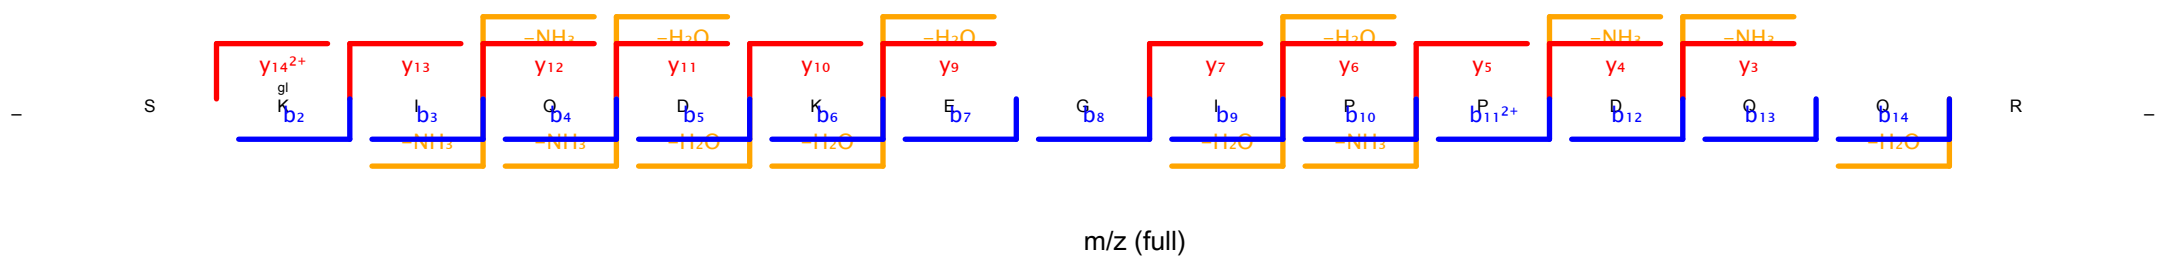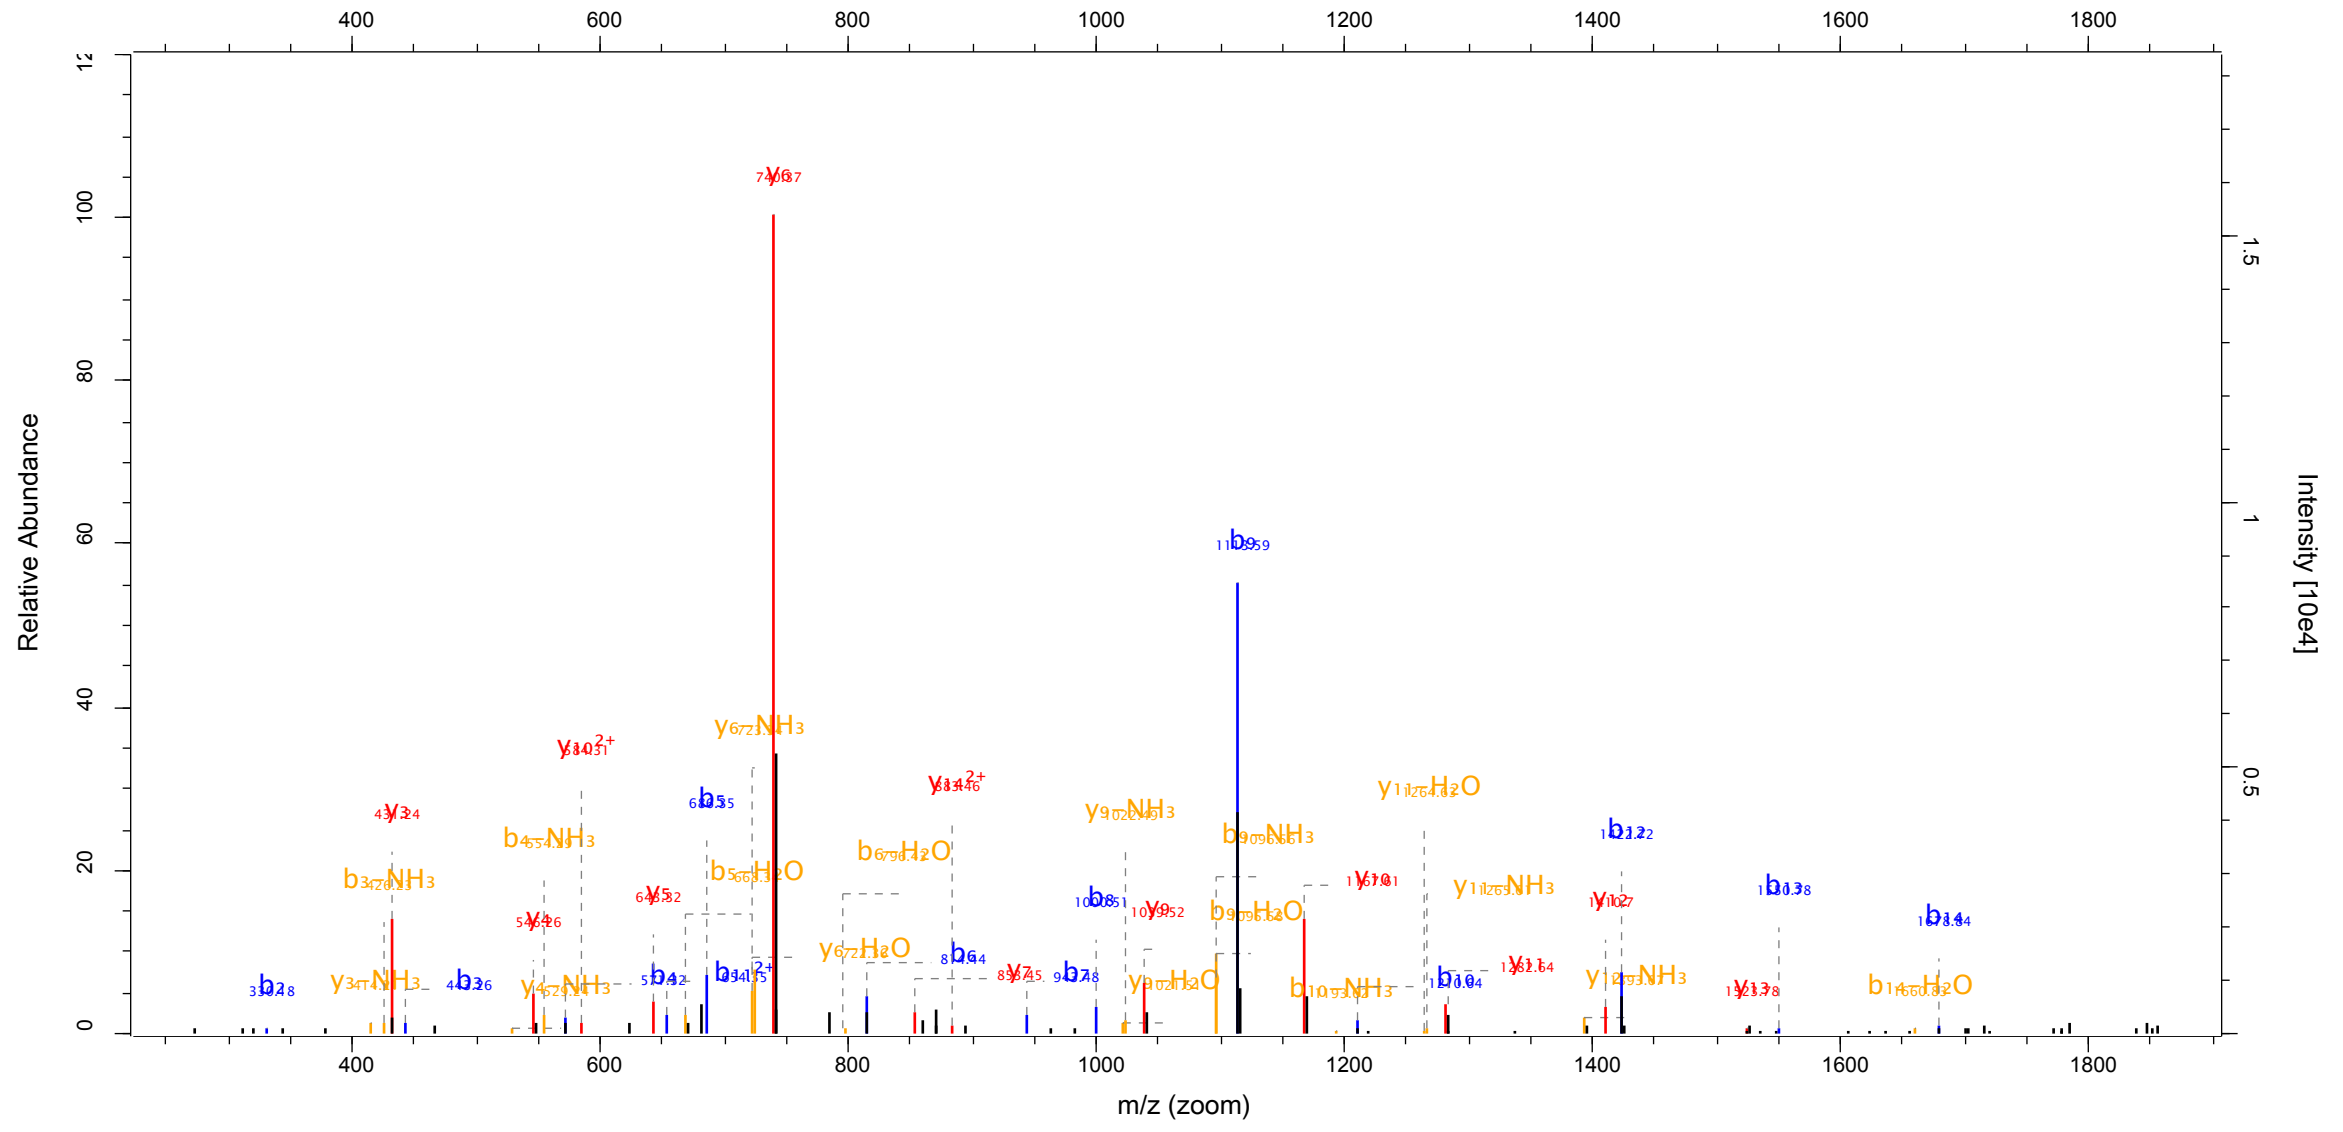

Scan number  
Method

24624  
ITMS; CID

Raw file  
Pepti...

nak\_ubx4HeavySAX1\_11nov06  
289.98

GlyGly Site Id 52

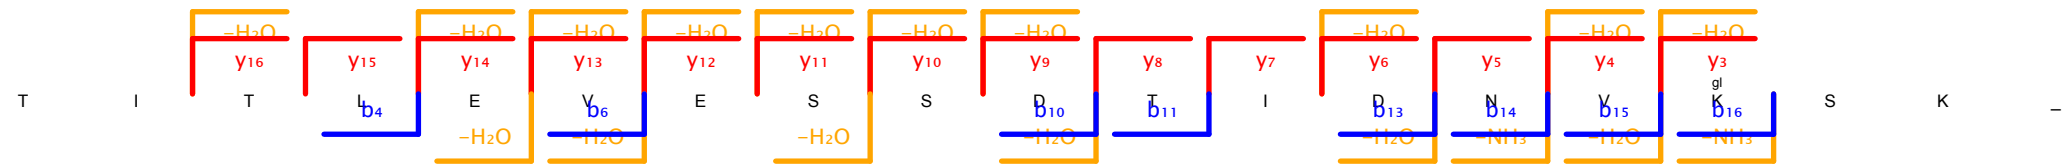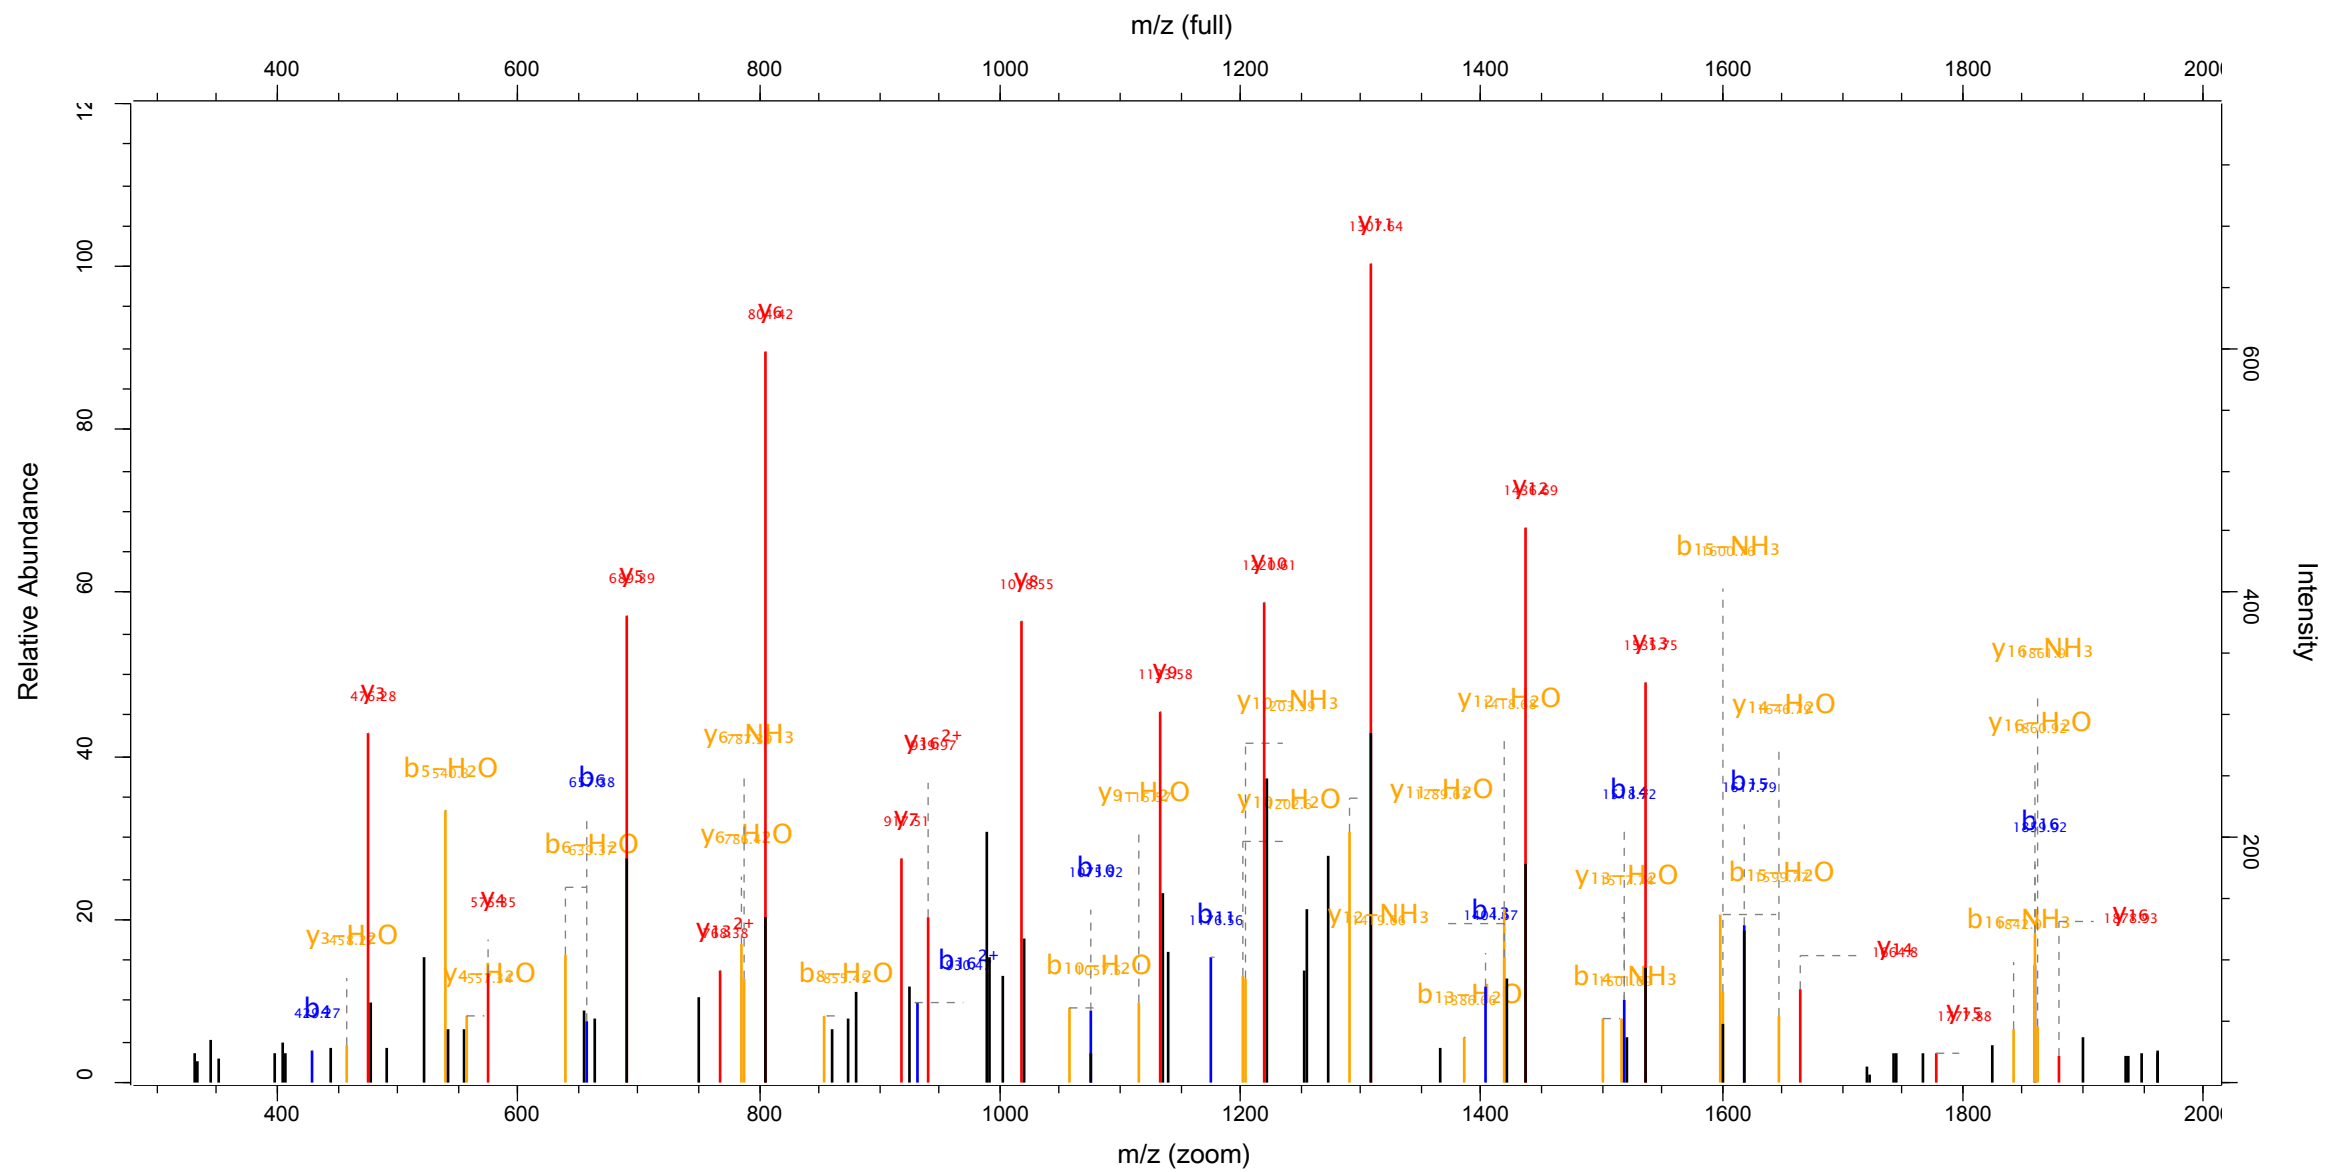

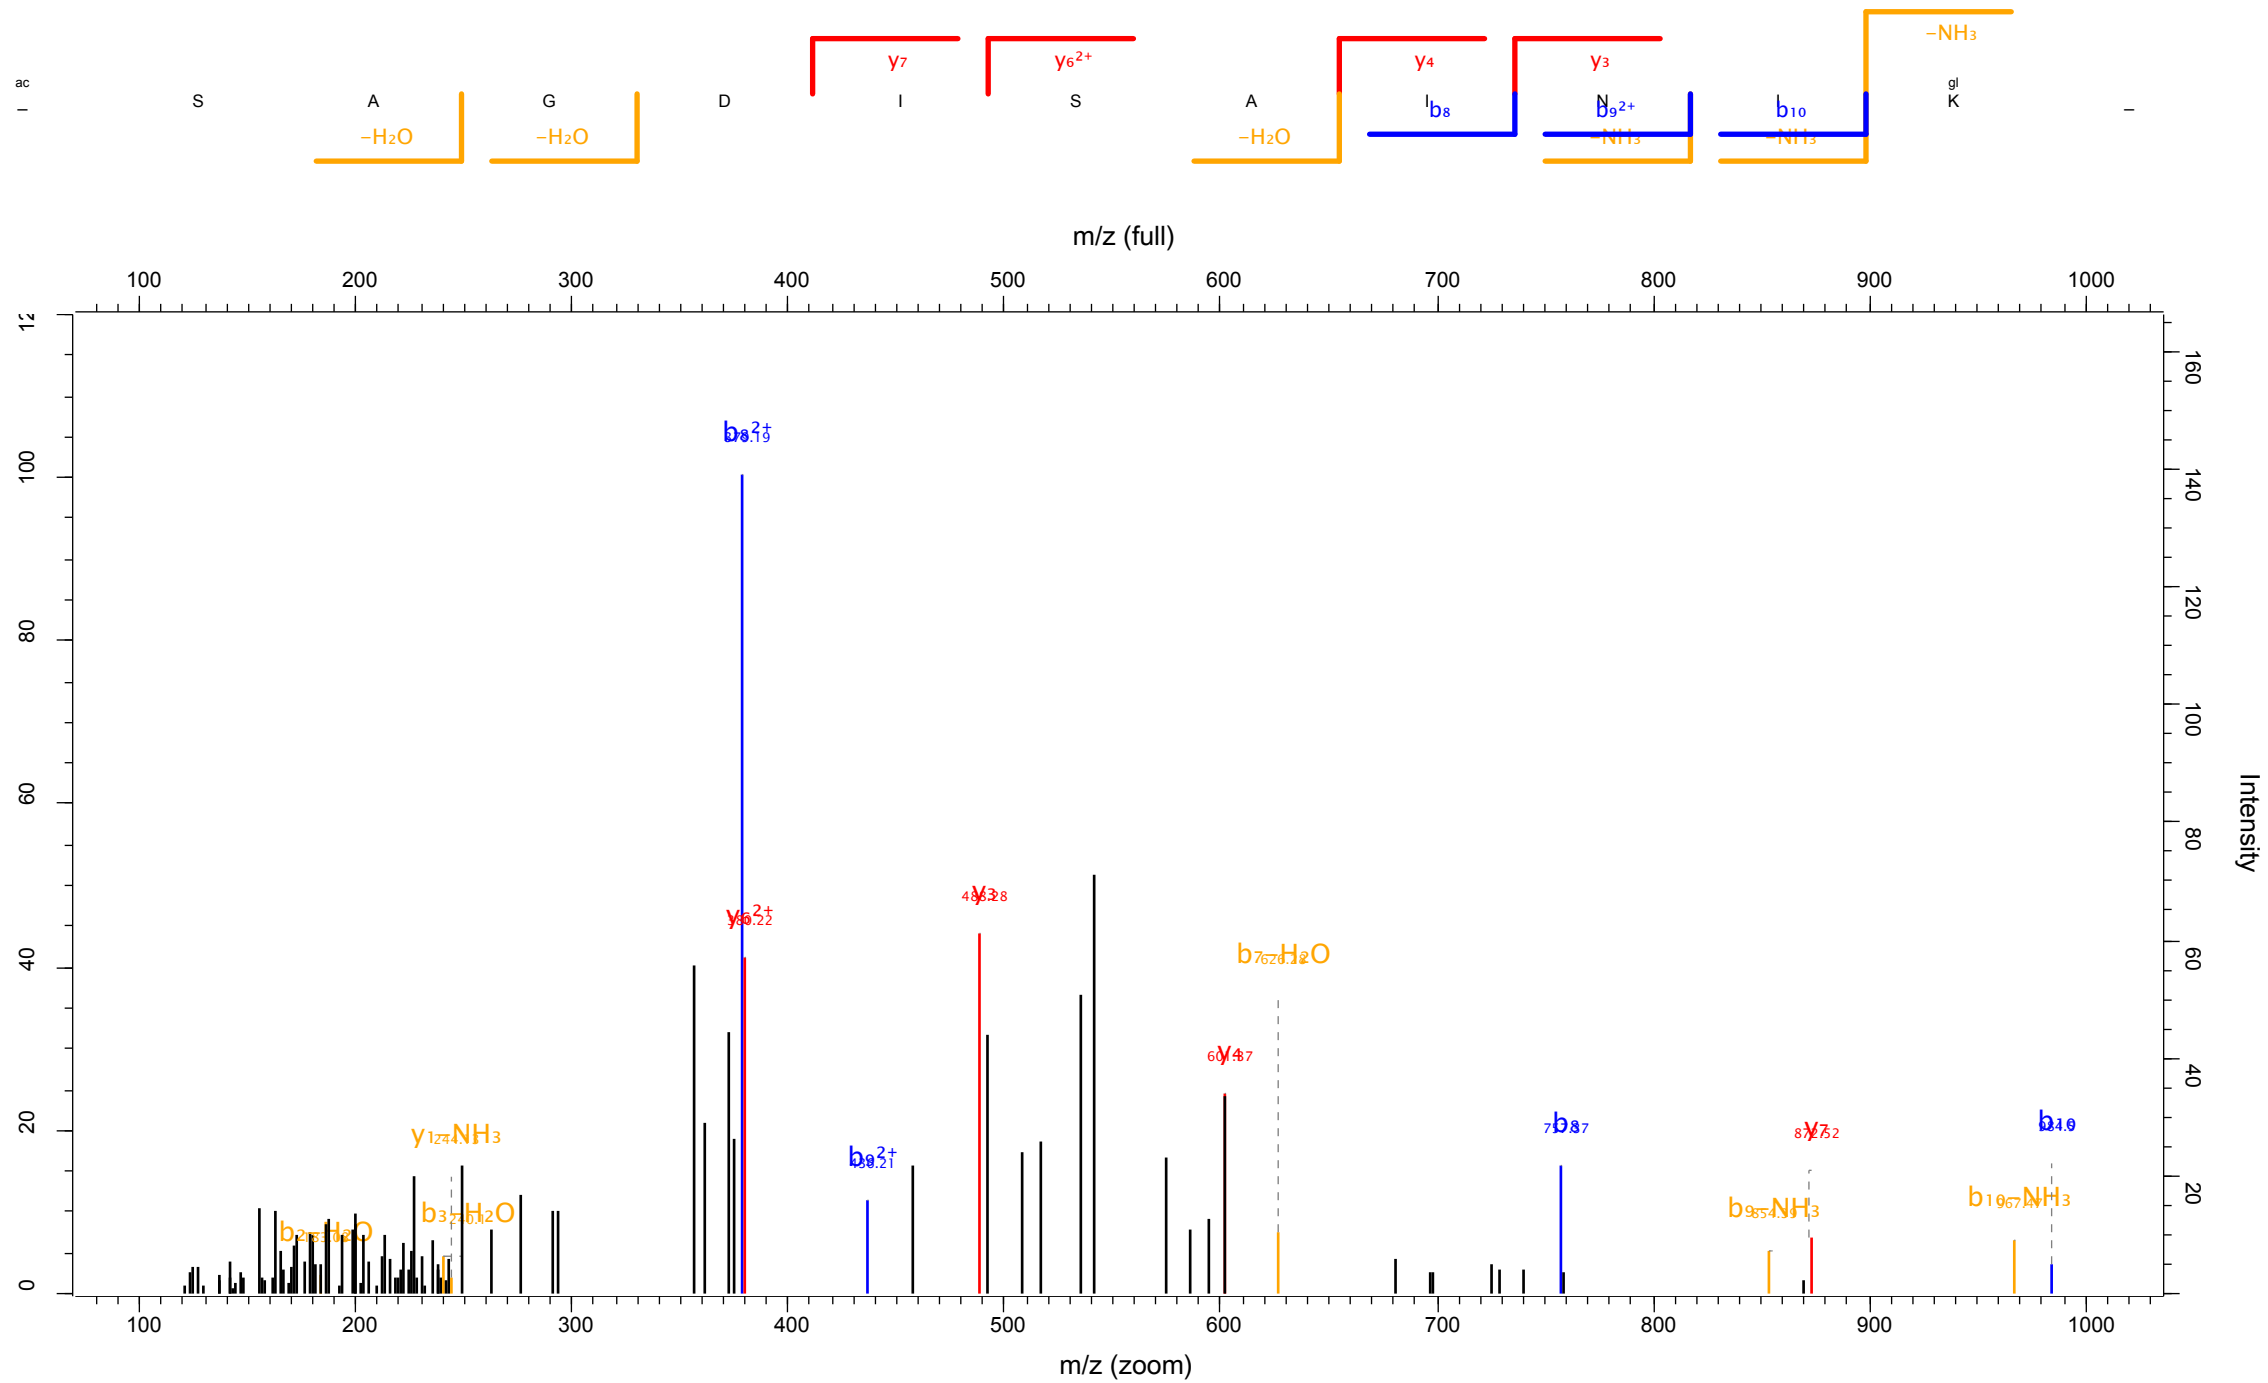

Scan number 19256 Raw file nak\_UBX2LSAX6\_8feb11\_06  
 Method ITMS; CID Pepti... 195.96

GlyGly Site Id 54

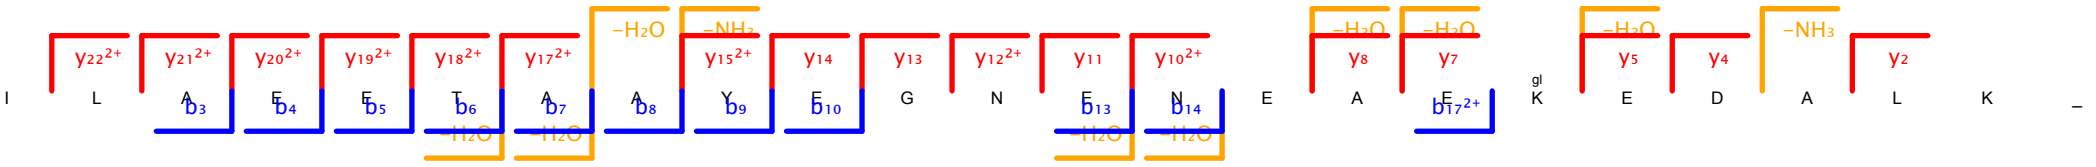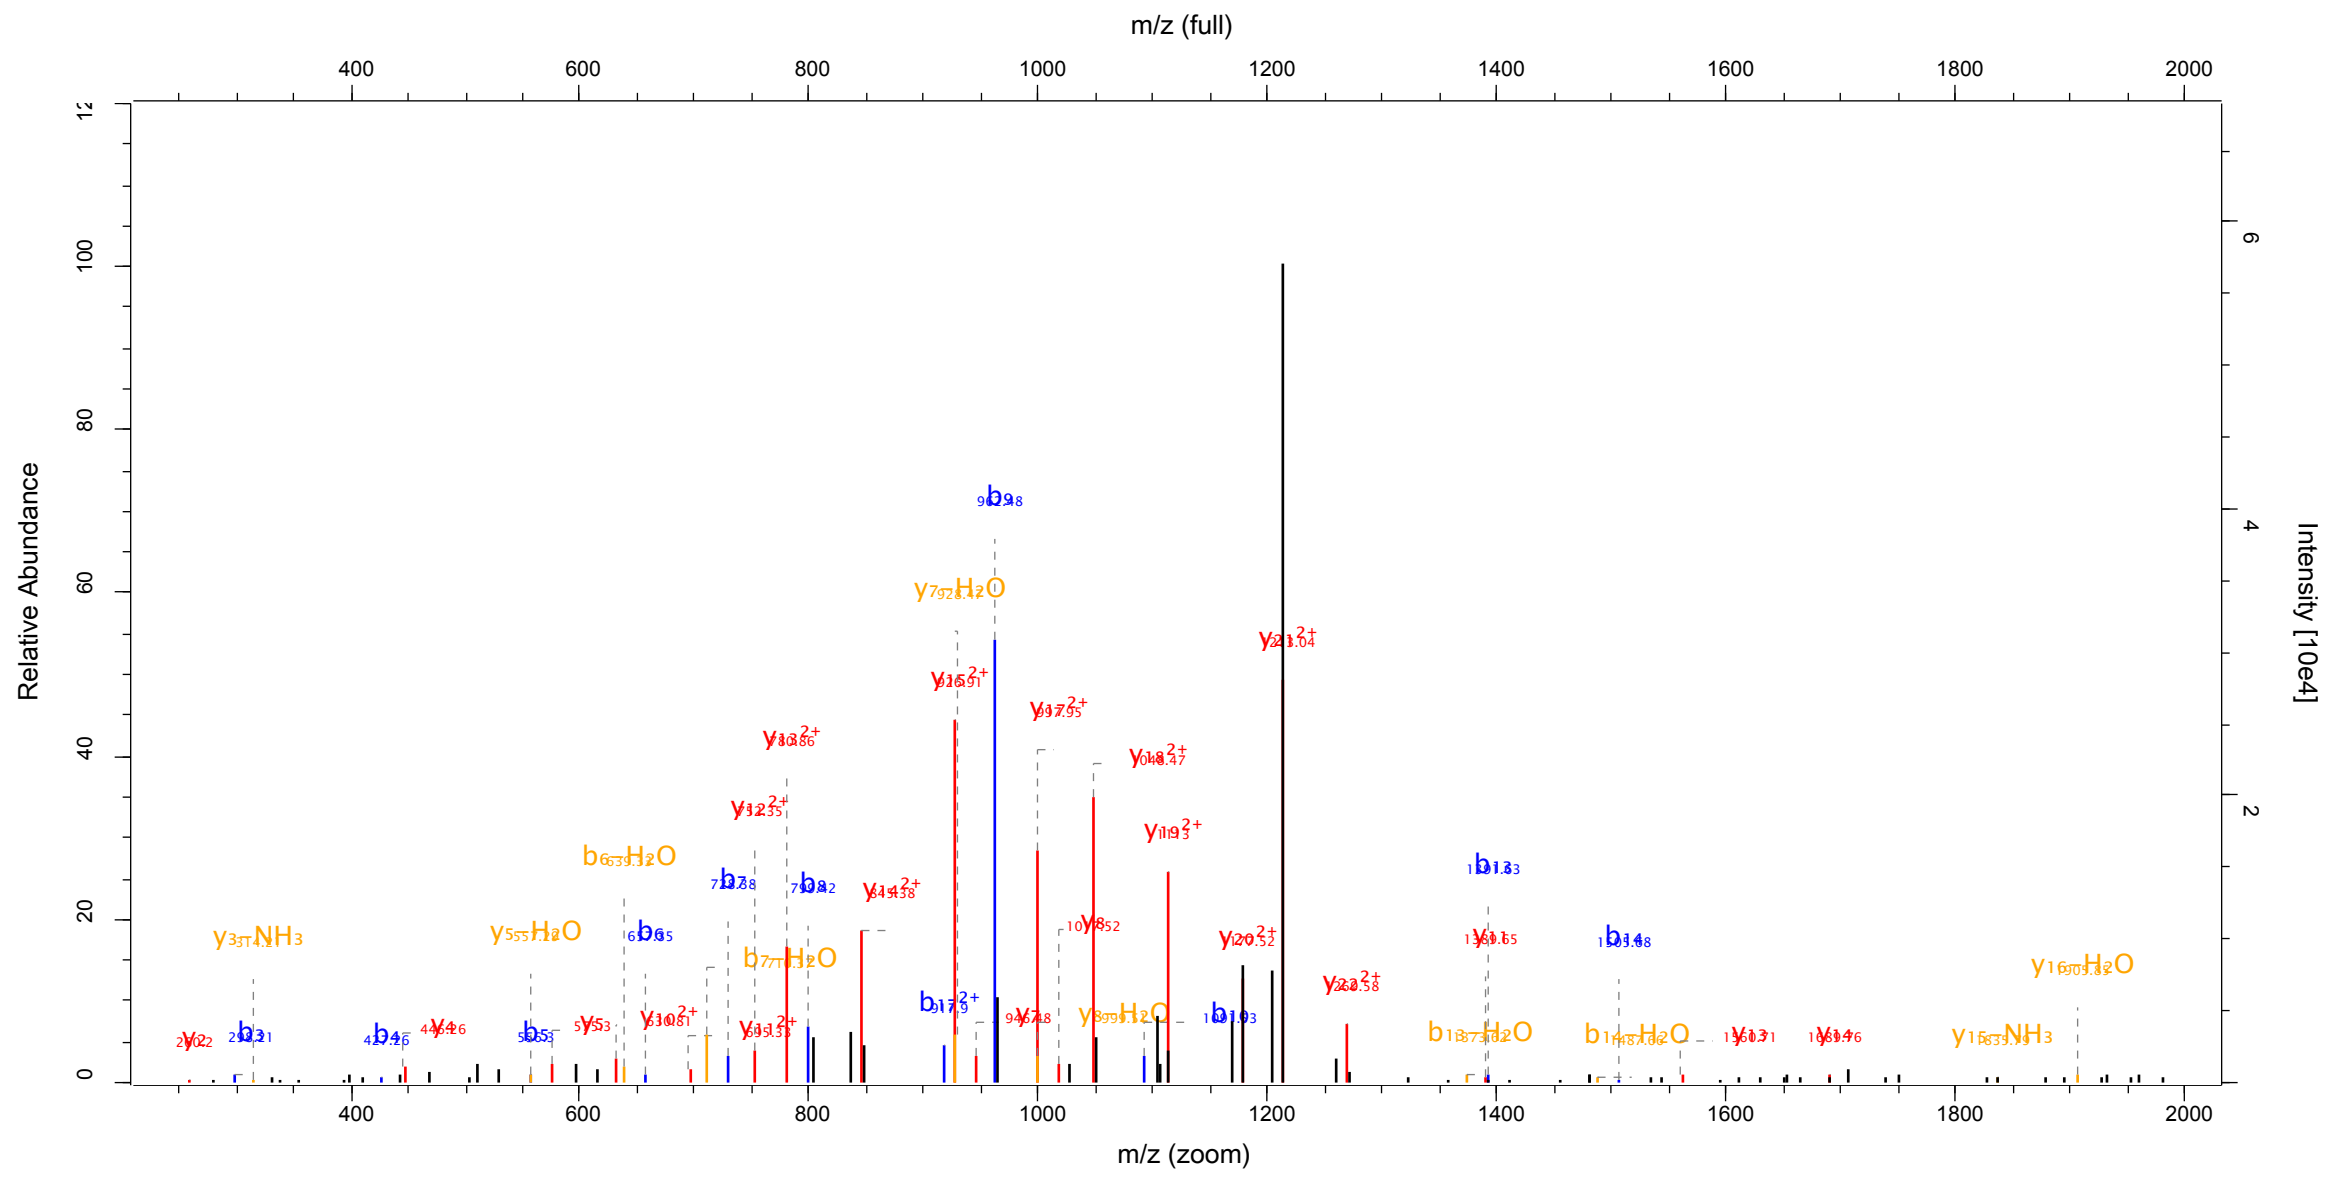

Scan number 18410 Raw file nak\_UBX2HSAX6\_8feb11\_10  
 Method ITMS; CID Pepti... 146.78

GlyGly Site Id 55

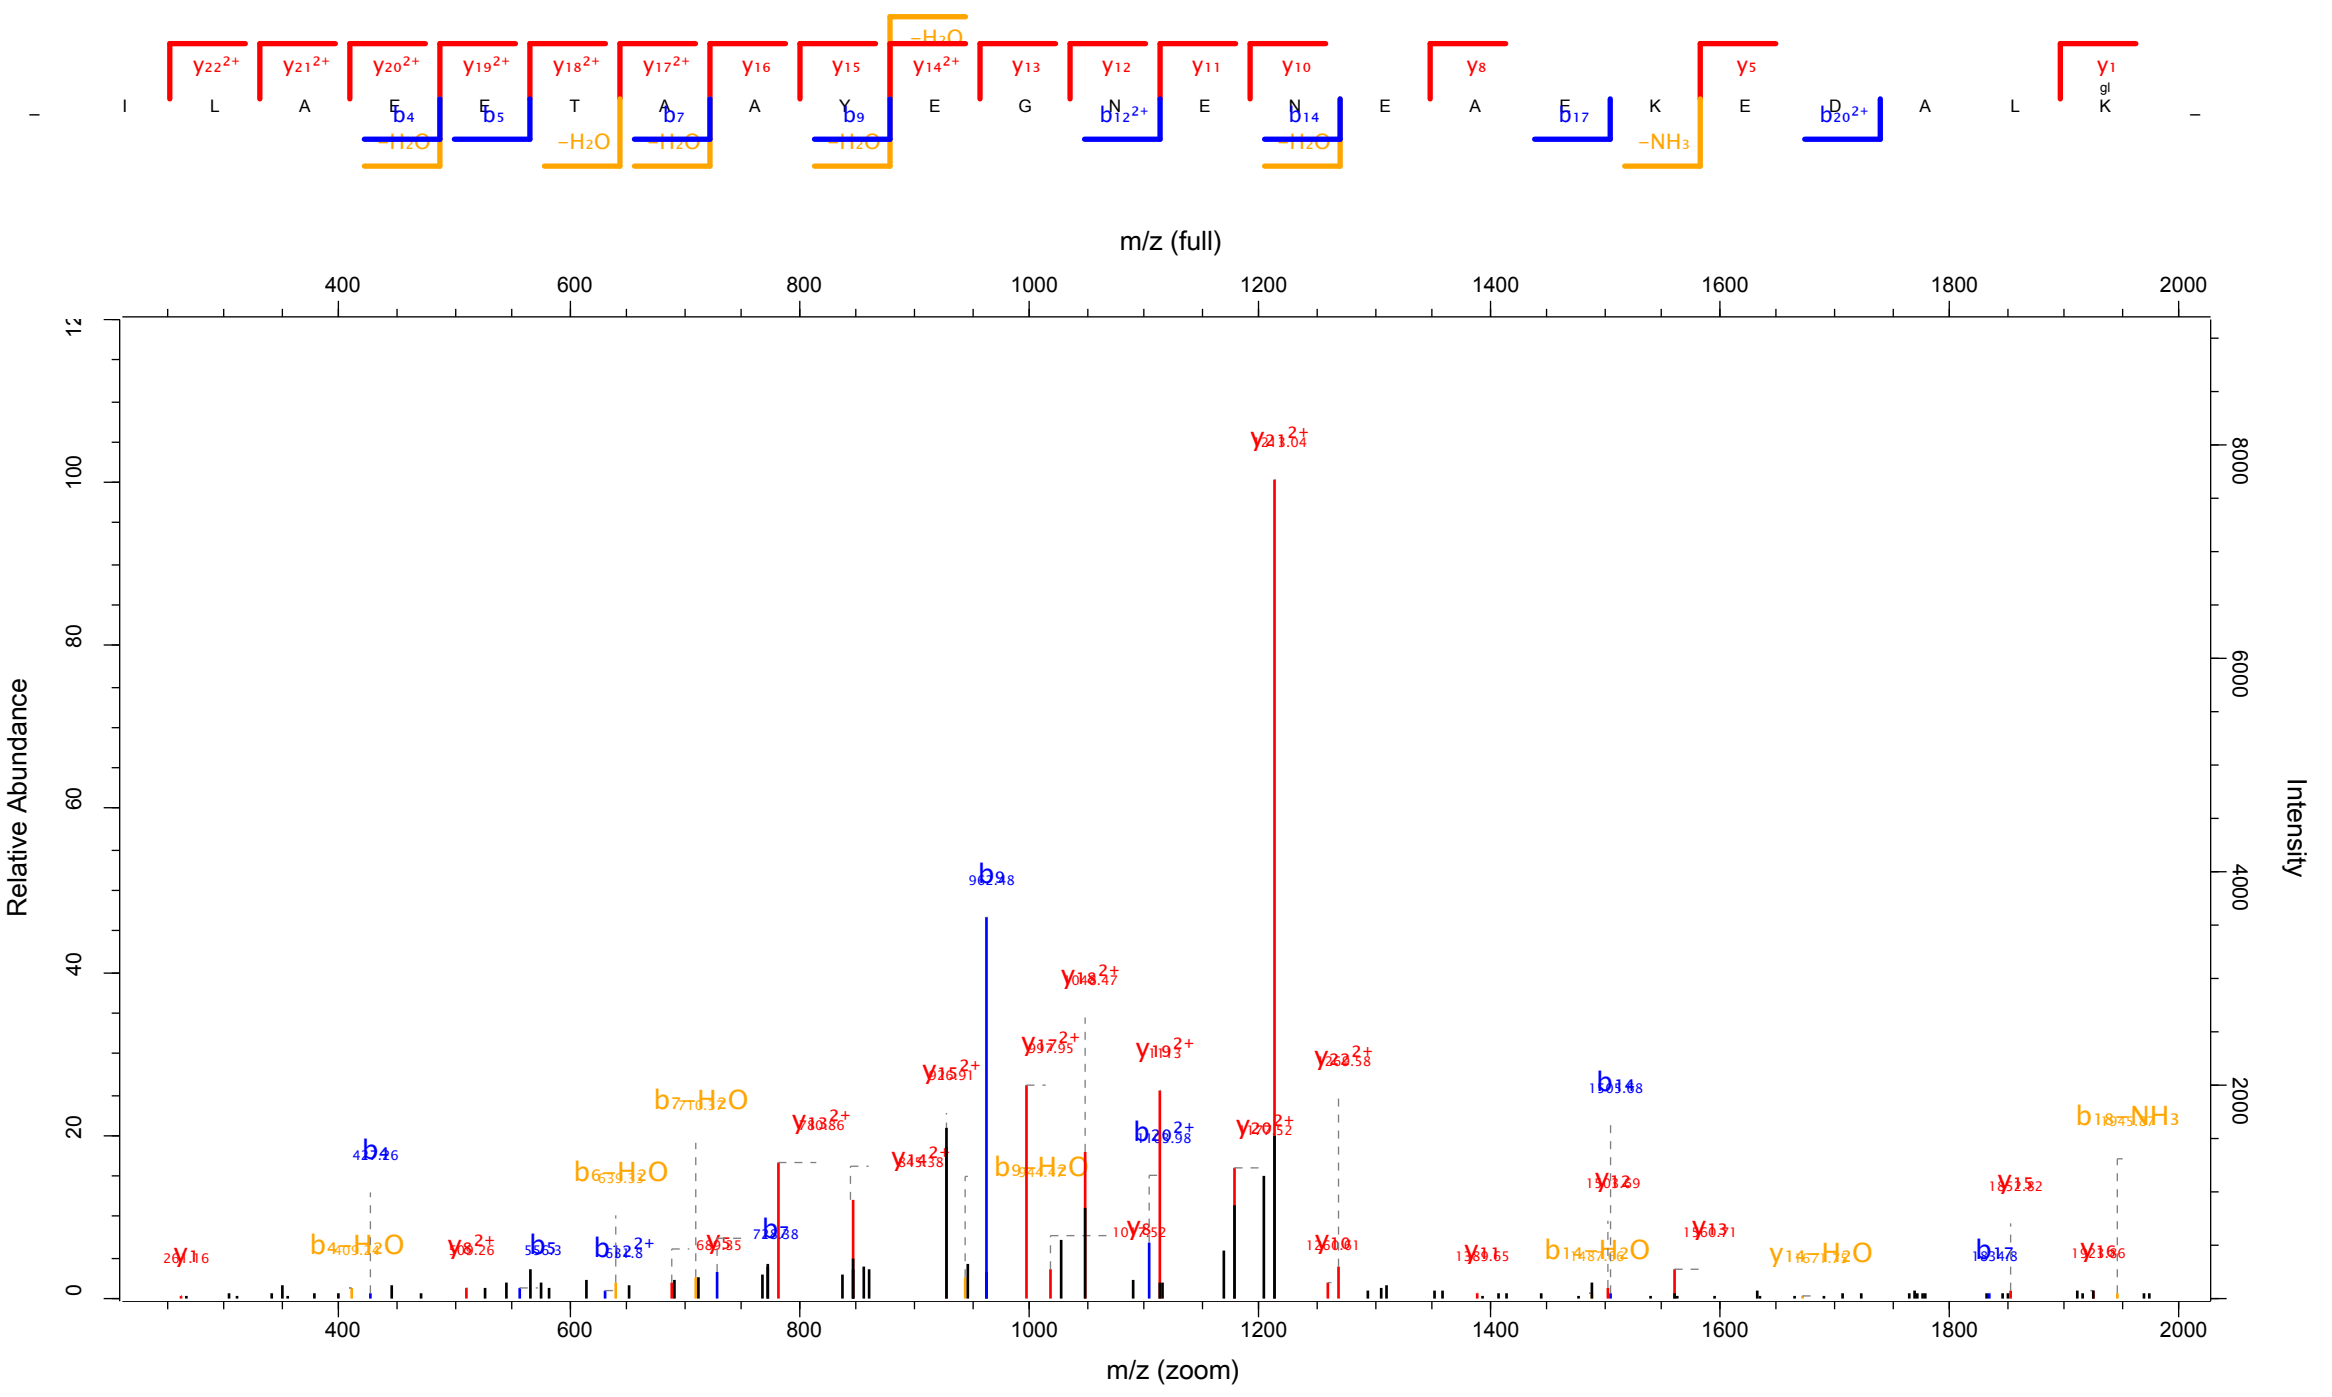

Scan number 22448 Raw file nak\_WTonetooneSAX3\_4feb11\_03  
 Method ITMS; CID Pepti... 208.56

GlyGly Site Id 56

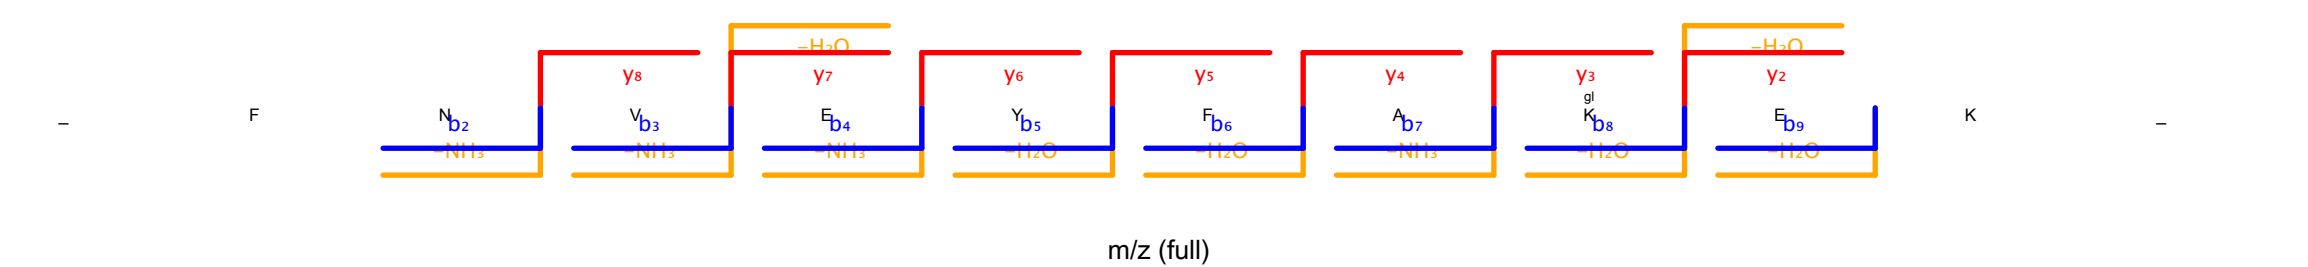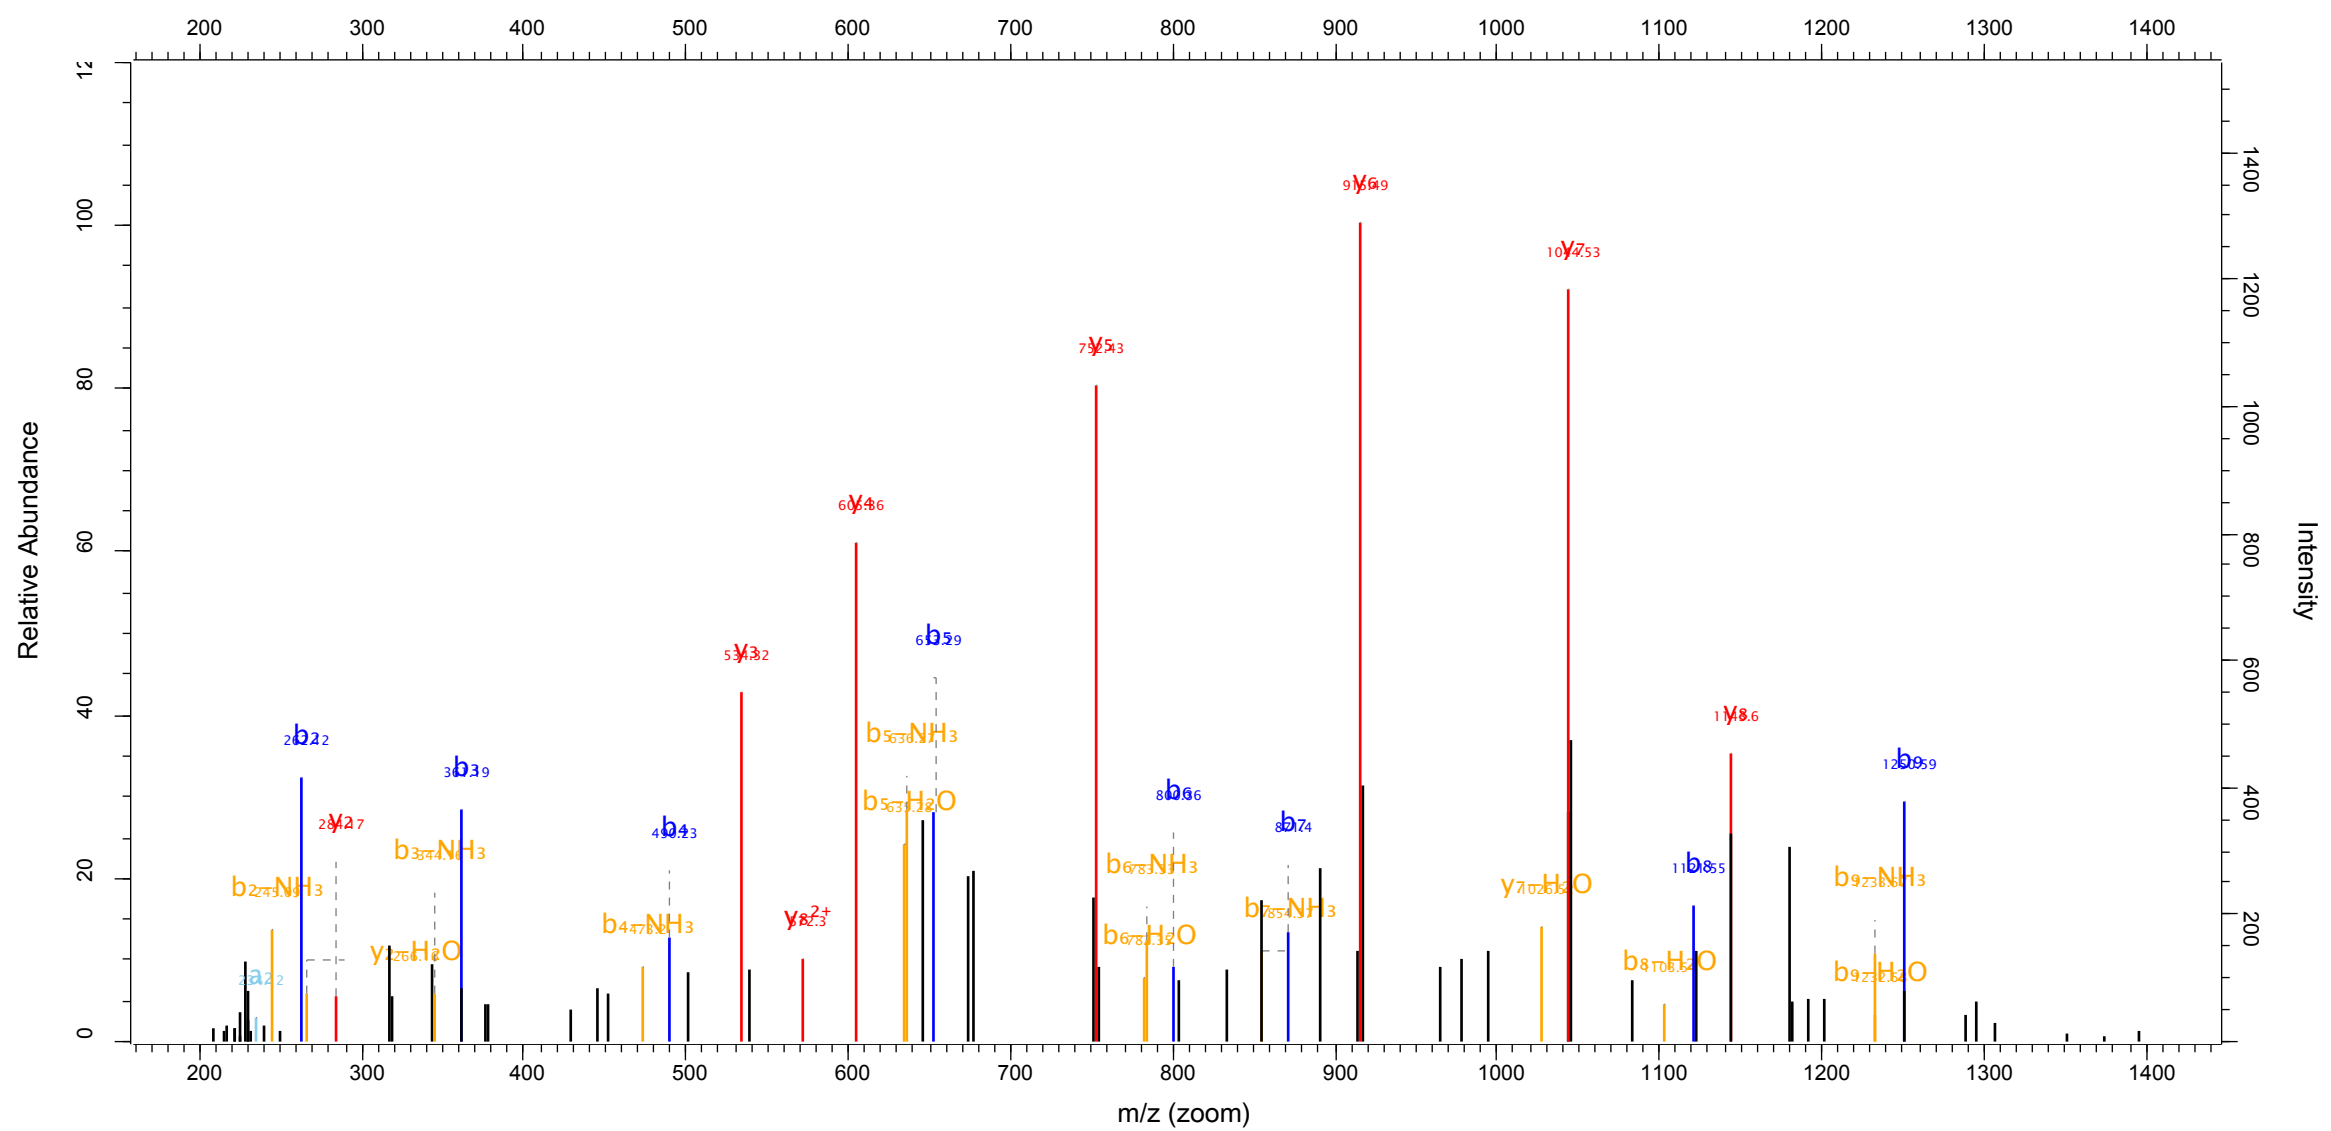

Scan number  
Method

37234  
ITMS; CID

Raw file  
Pepti...

nak\_ubx4HeavySAX1\_11nov06  
178.14

GlyGly Site Id 57

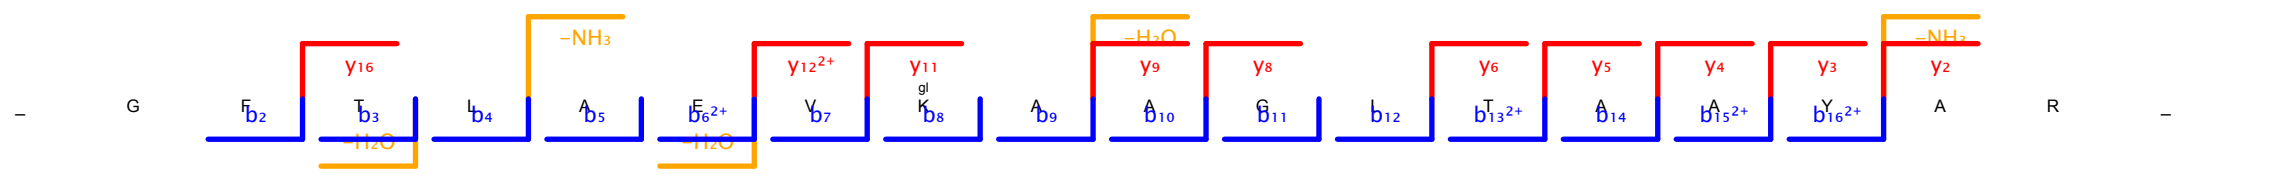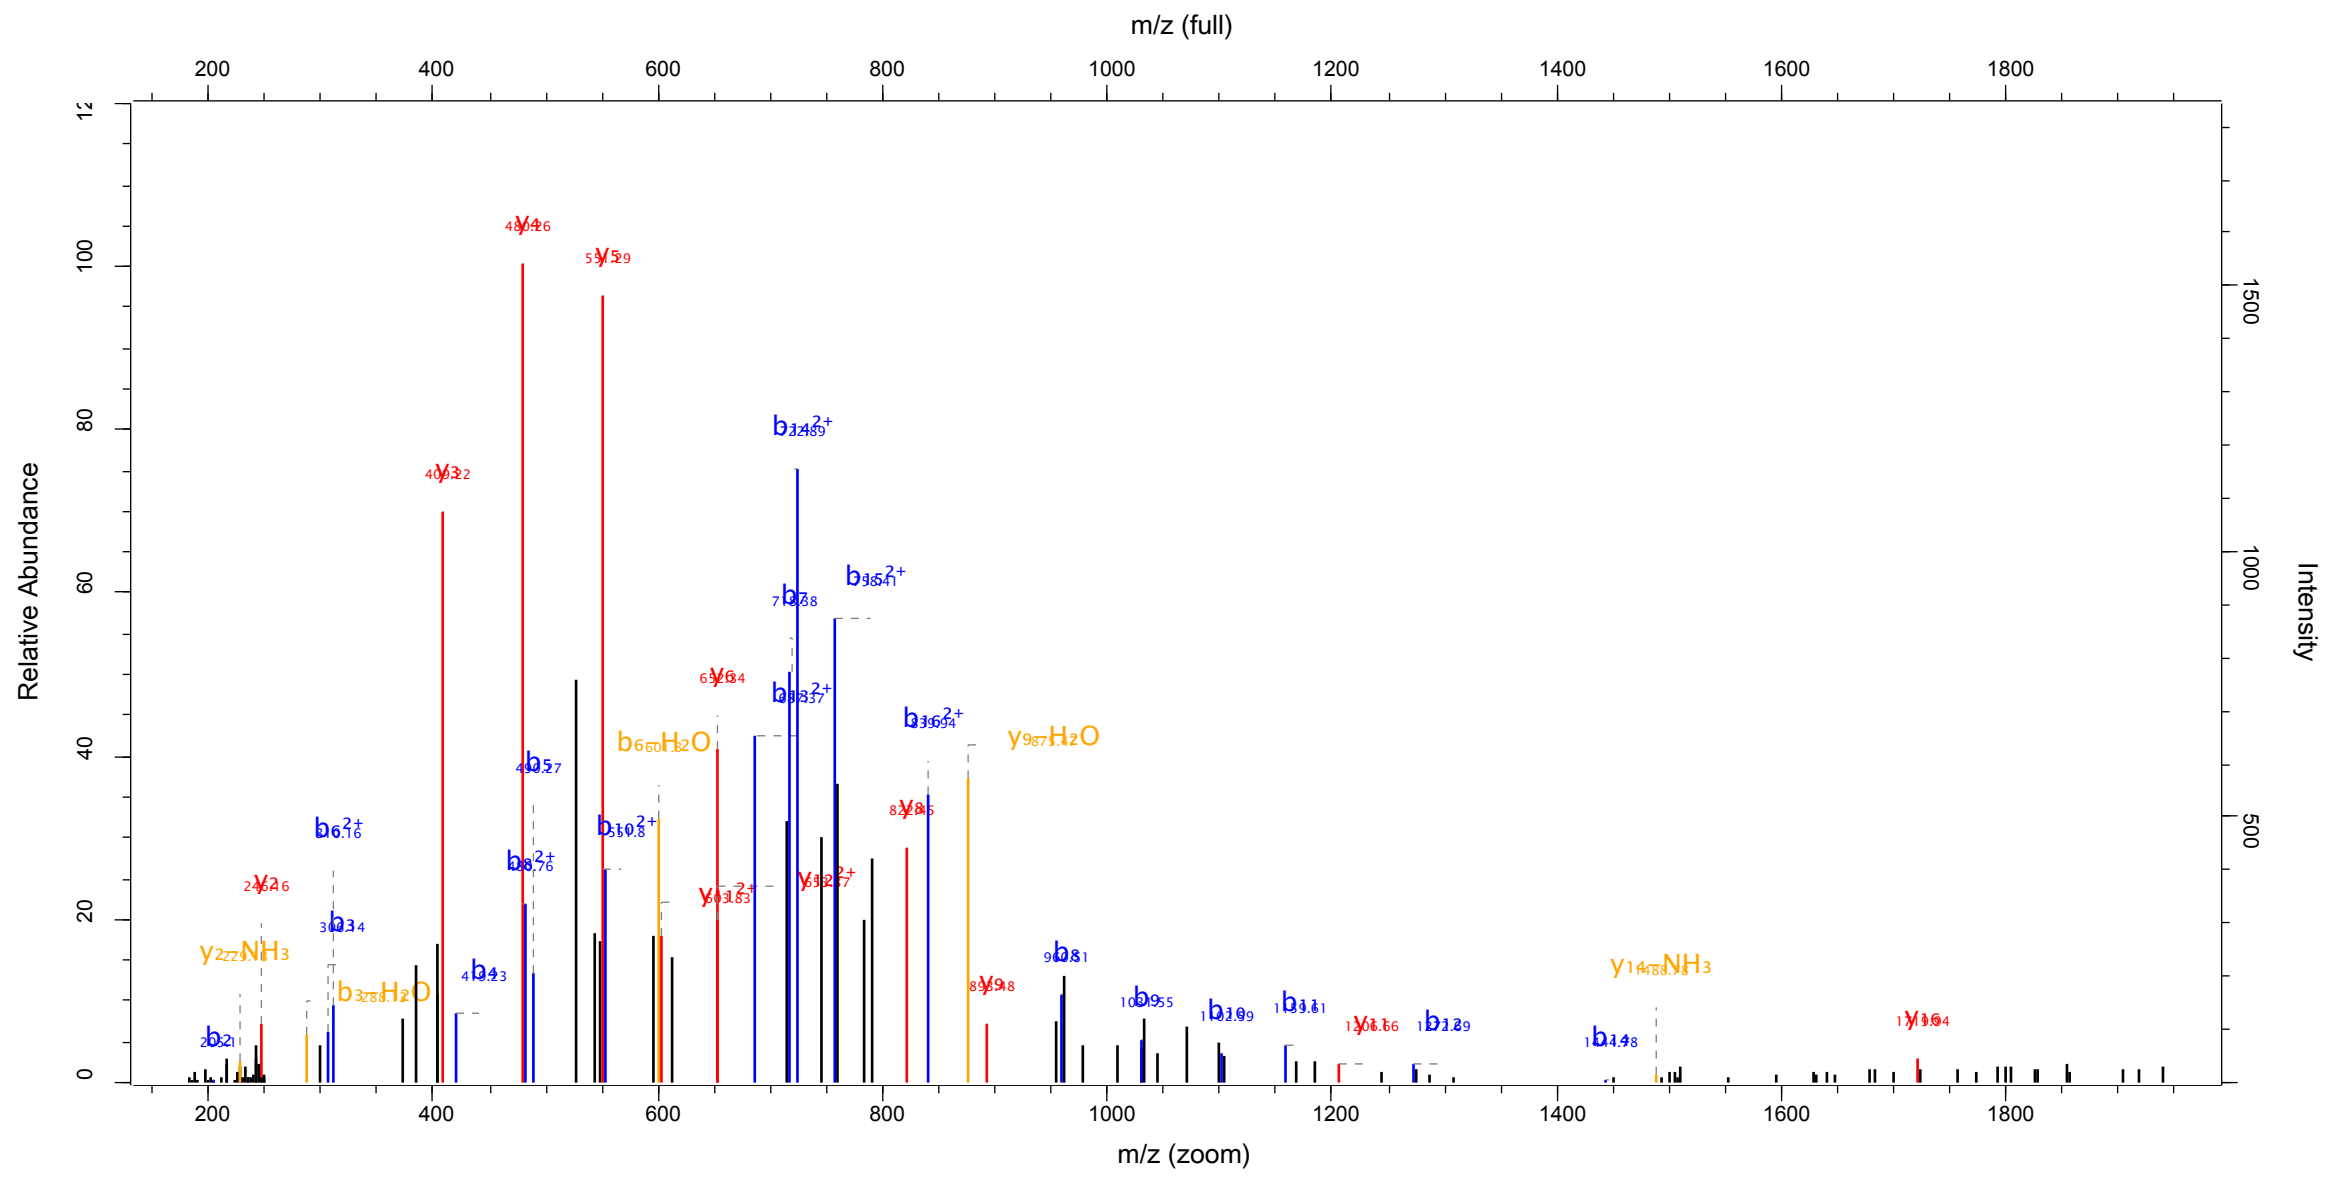

Scan number  
Method

29163  
ITMS; CID

Raw file  
Pepti...

nak\_ubx4HeavySAX3\_11nov08  
107.03

GlyGly Site Id 58

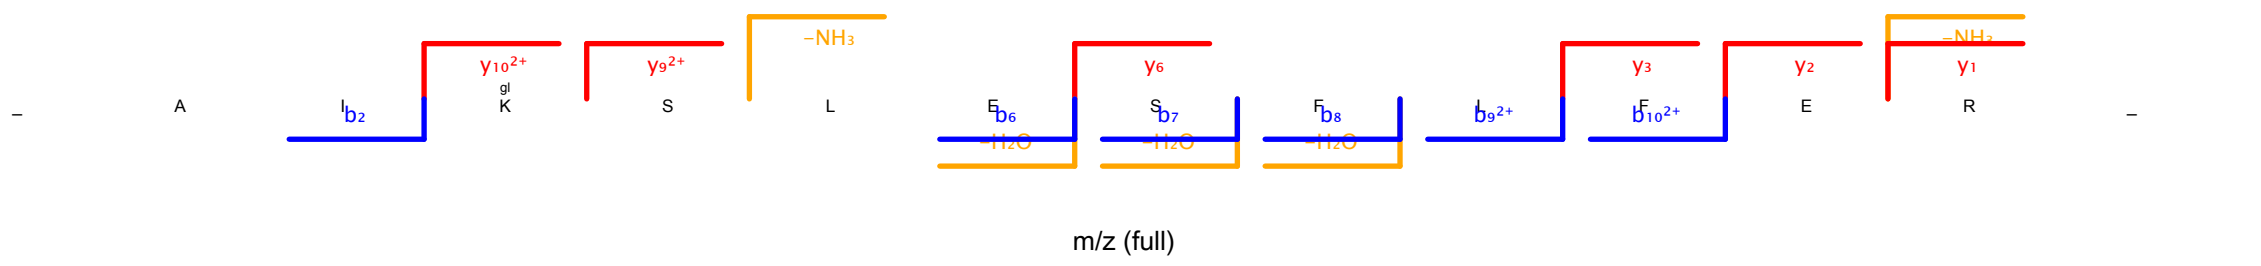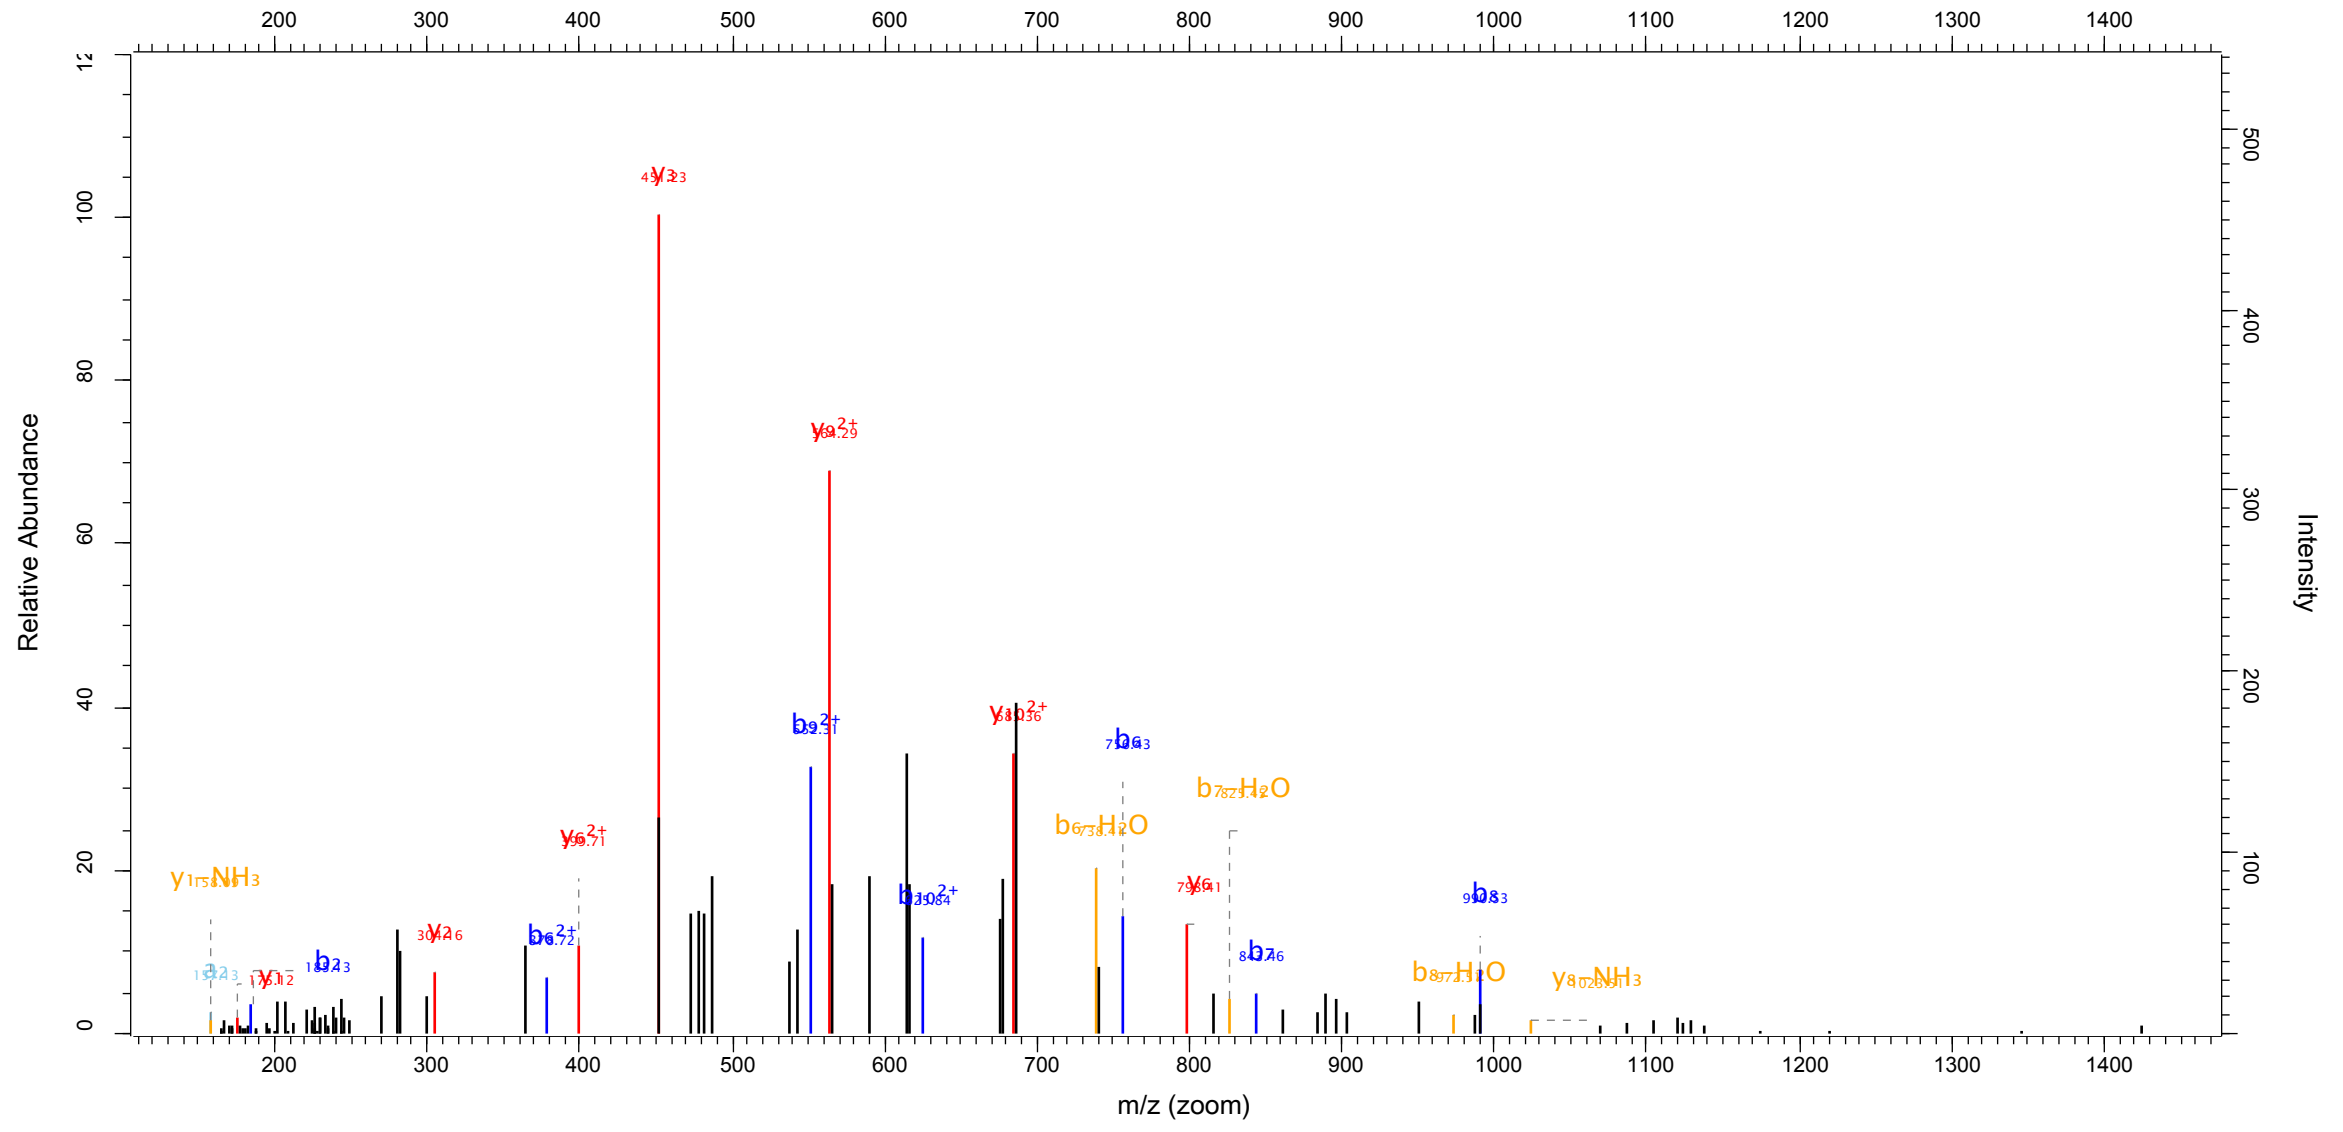



Scan number

29413

Raw file

nak\_cdc48UbconjugatesSAX3\_14may10\_07

GlyGly Site Id 59

Method

ITMS; CID

Pepti...

148.85

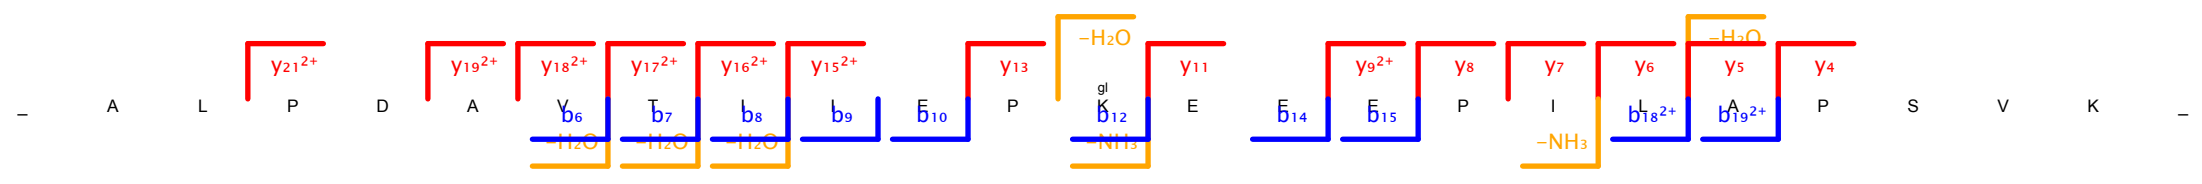

m/z (full)

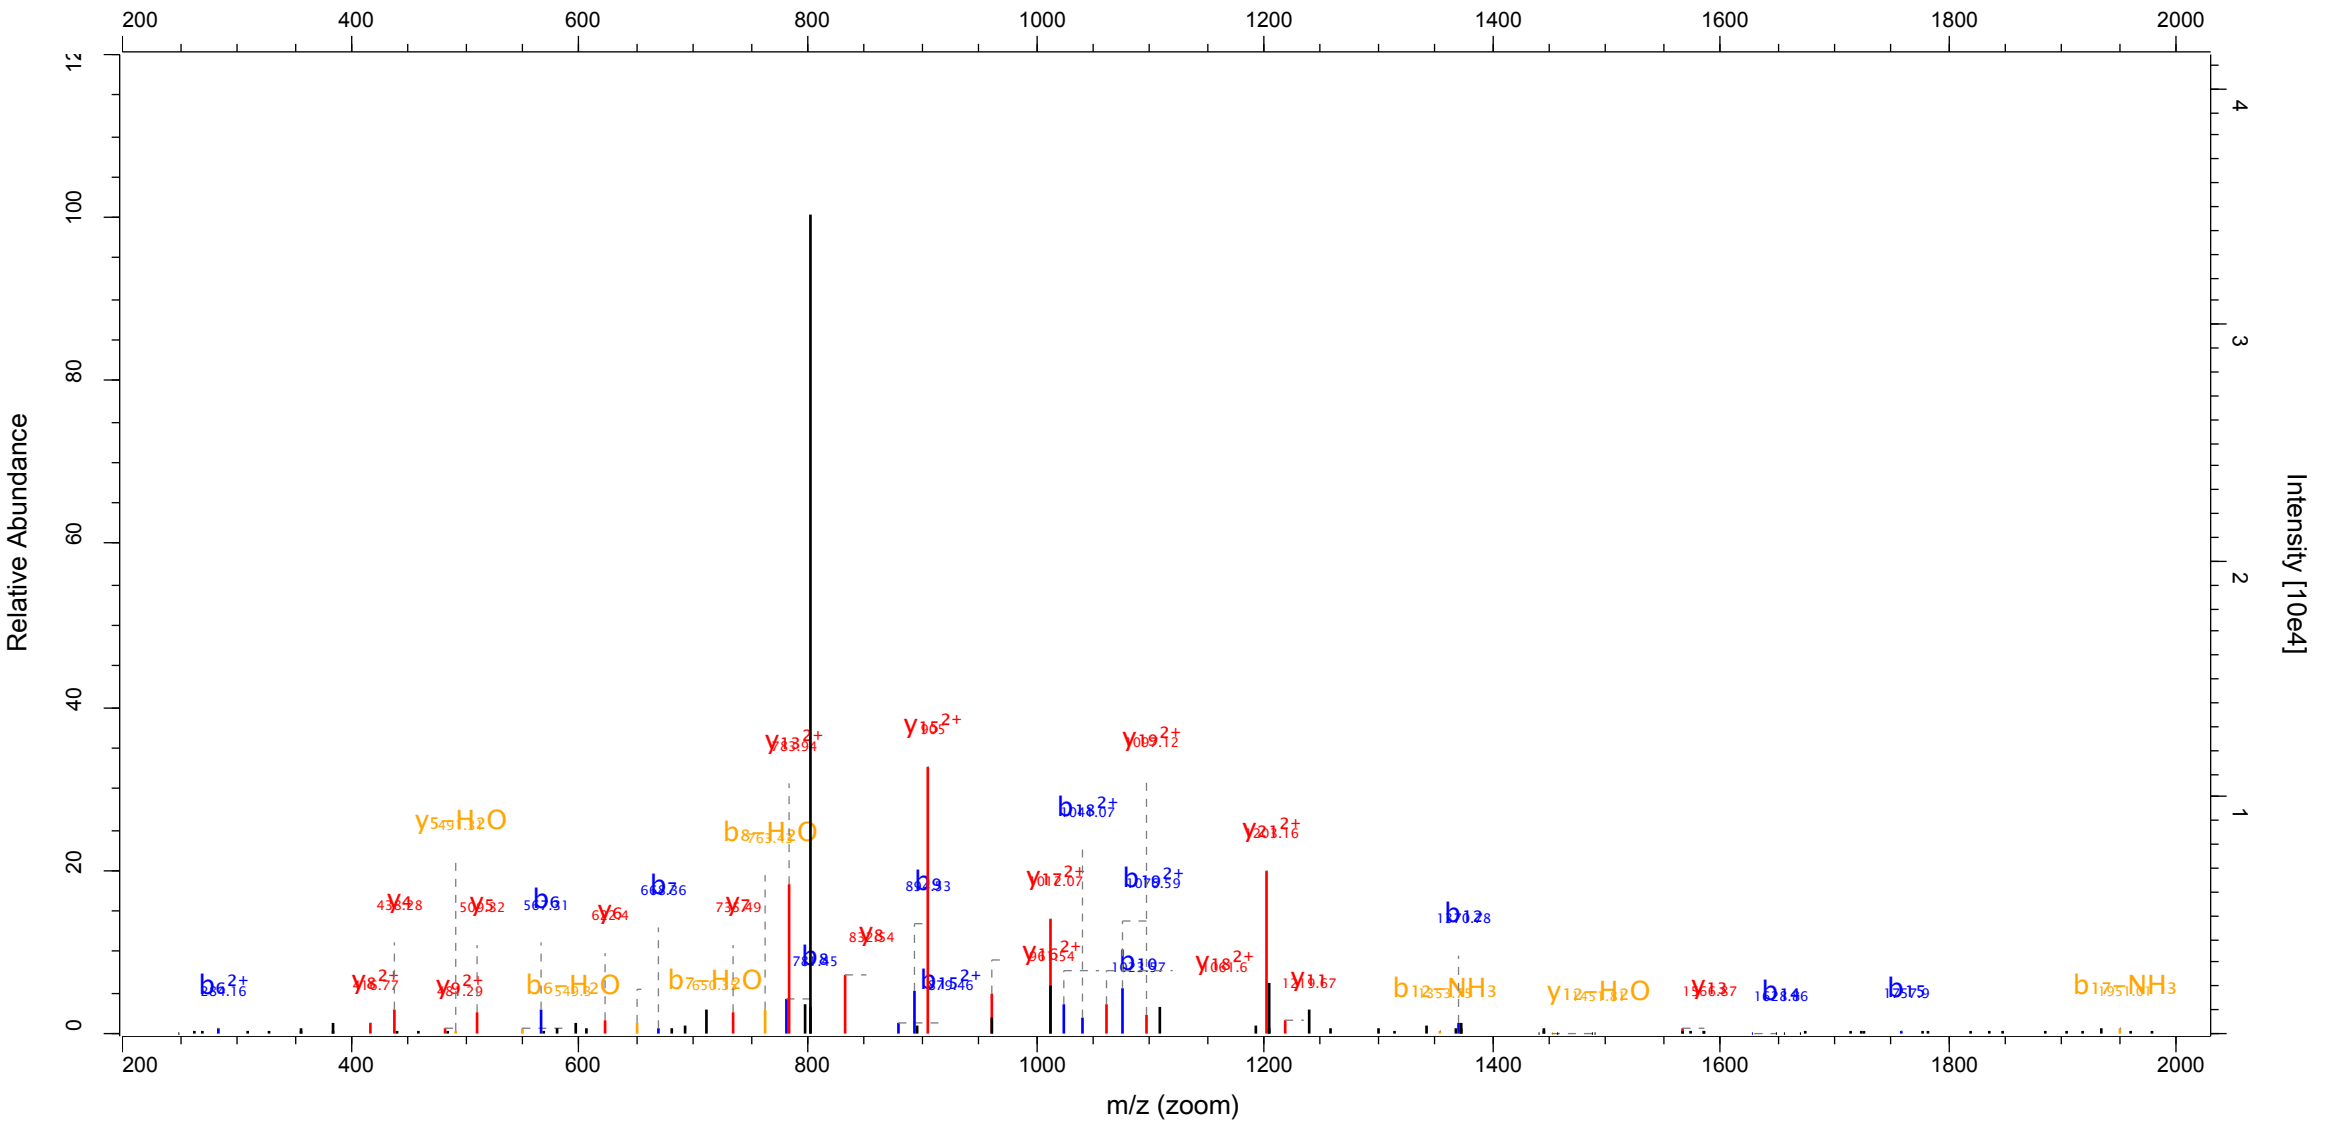

Scan number  
Method

16298  
ITMS; CID

Raw file  
Pepti...

nak\_UBX6SAX2L\_14jan11\_12  
172.94

GlyGly Site Id 60

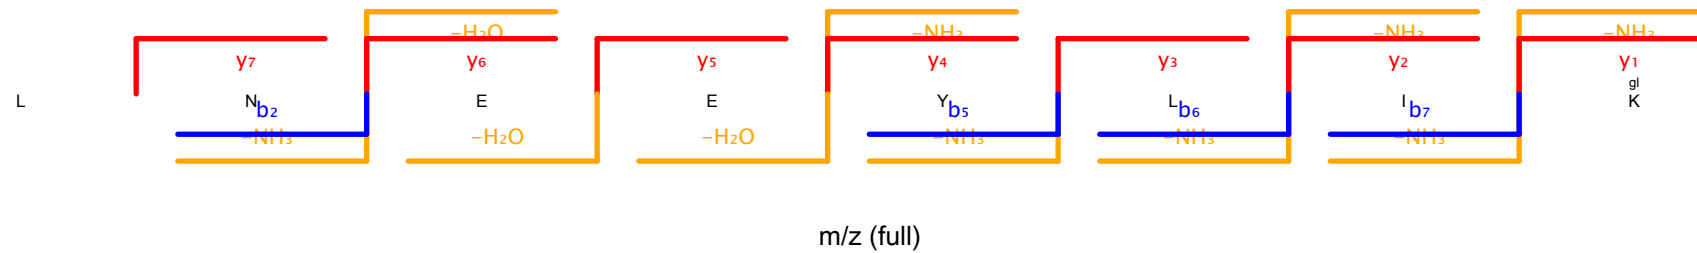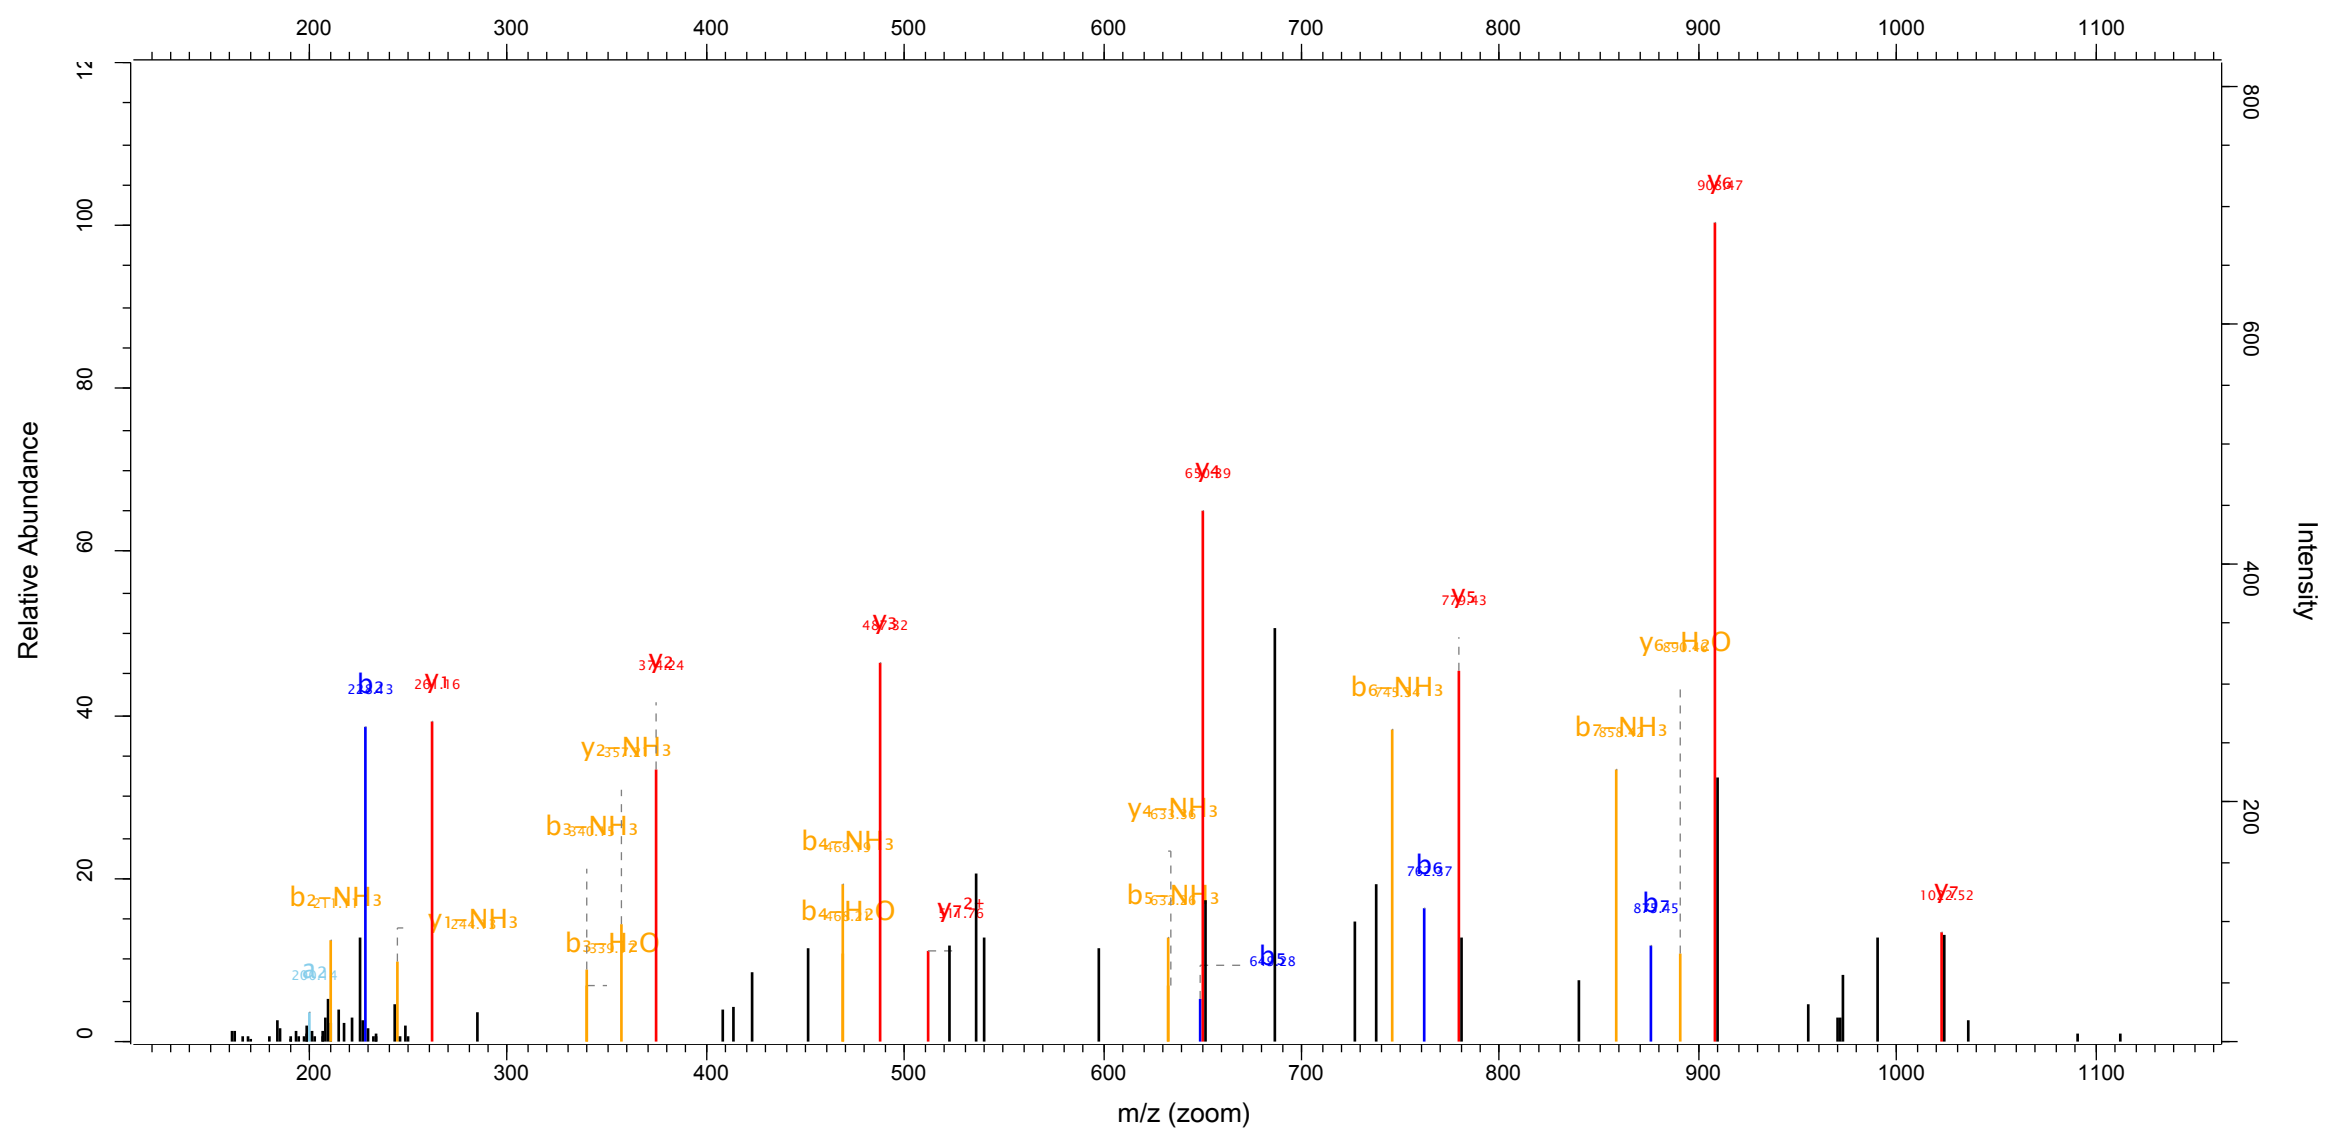

Scan number 5910 Raw file nak\_UBX7HSAX2\_20Jan11\_2  
 Method ITMS; CID Pepti... 81.9

GlyGly Site Id 61

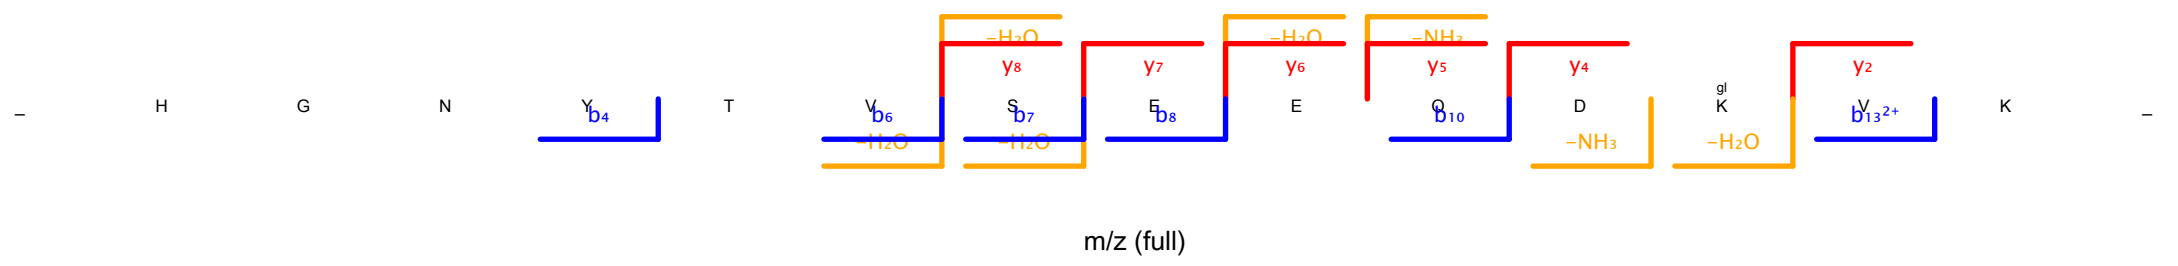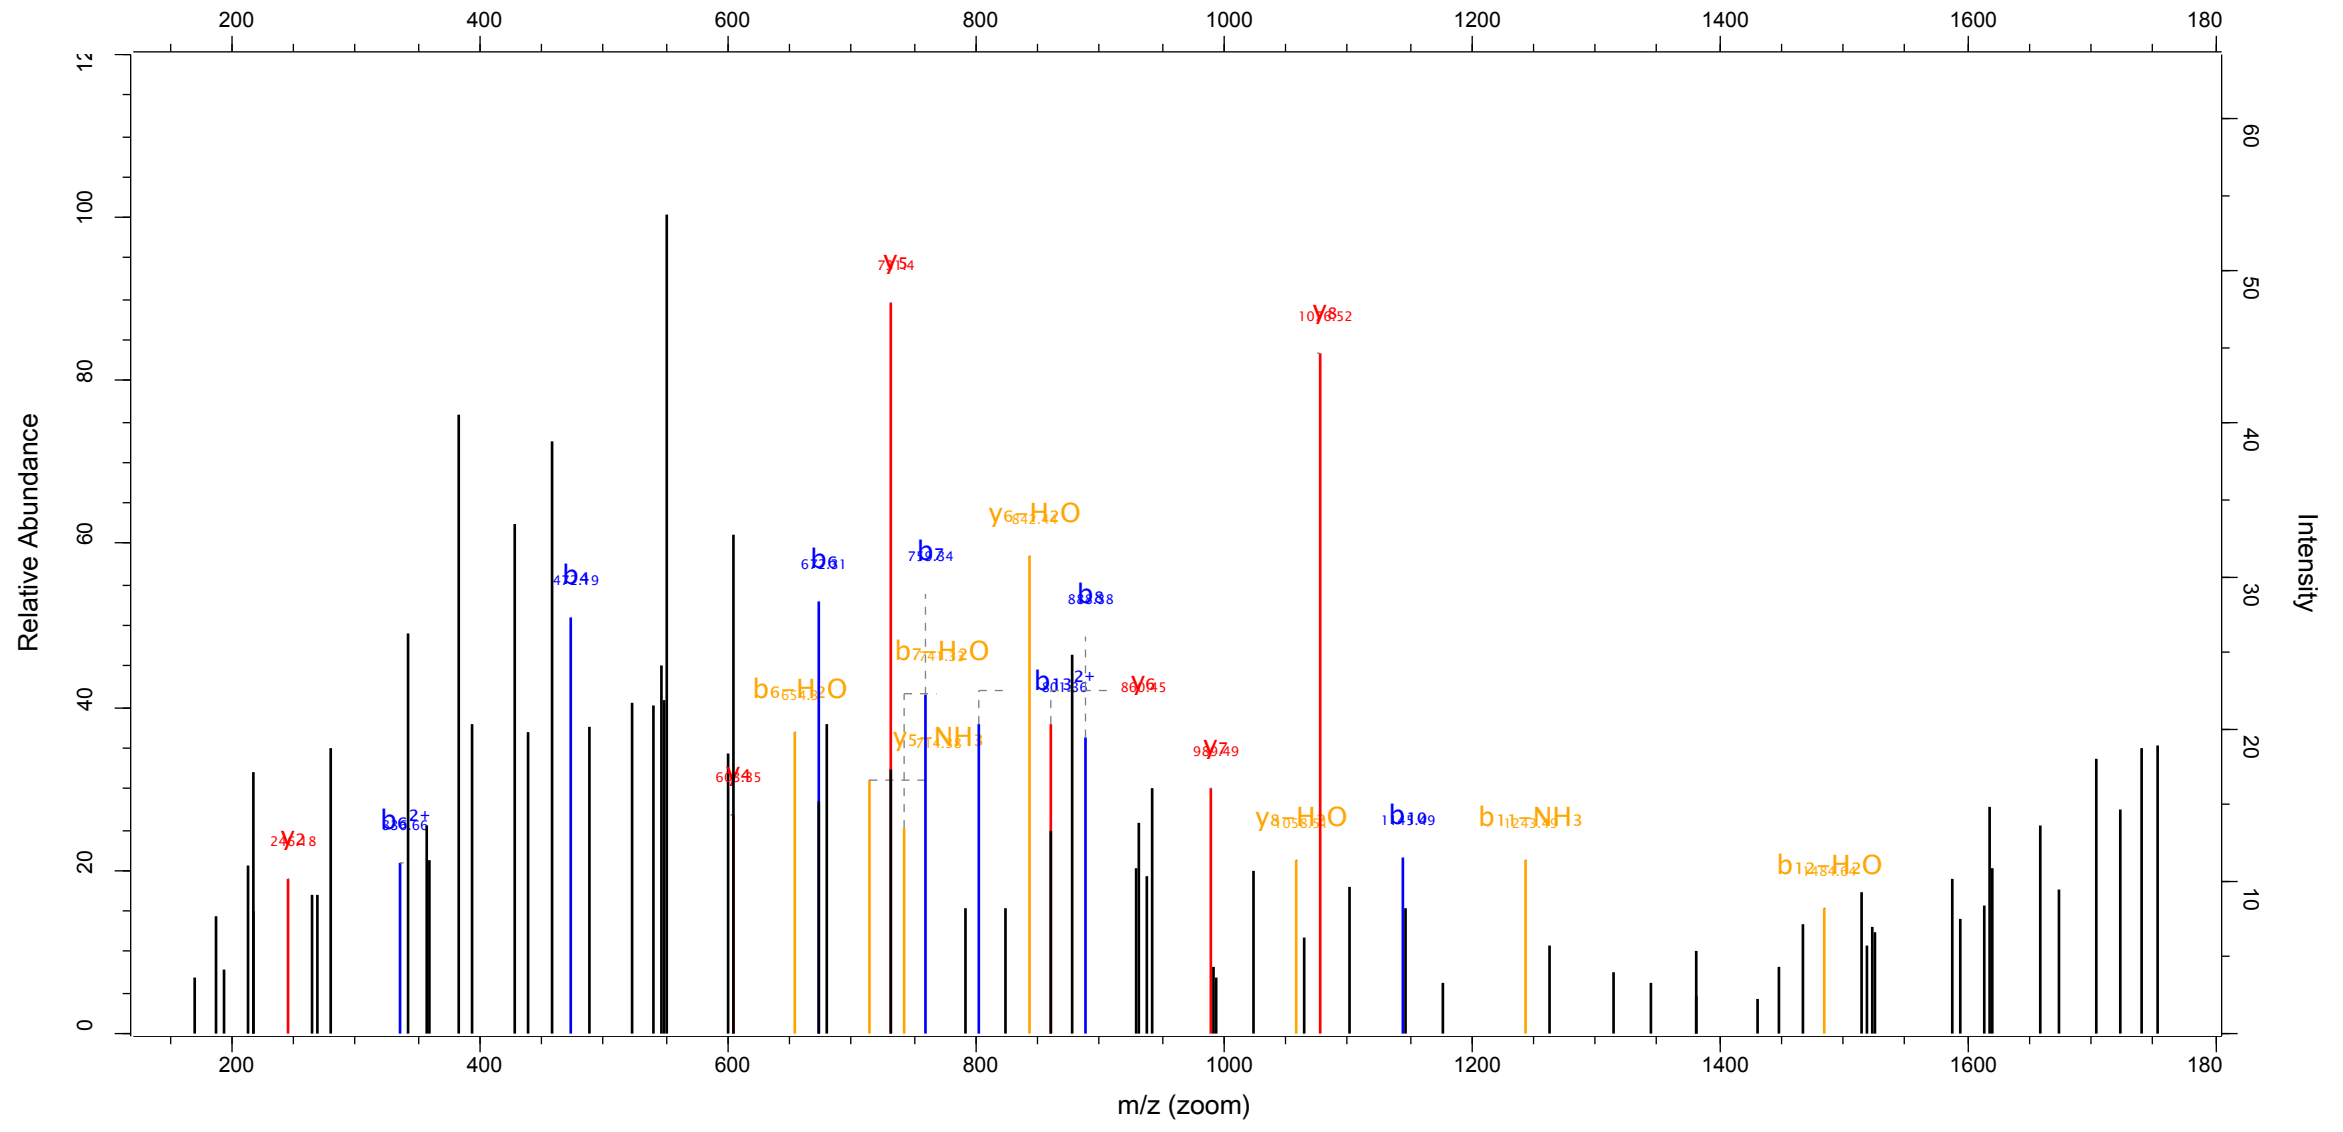

GlyGly Site Id 62

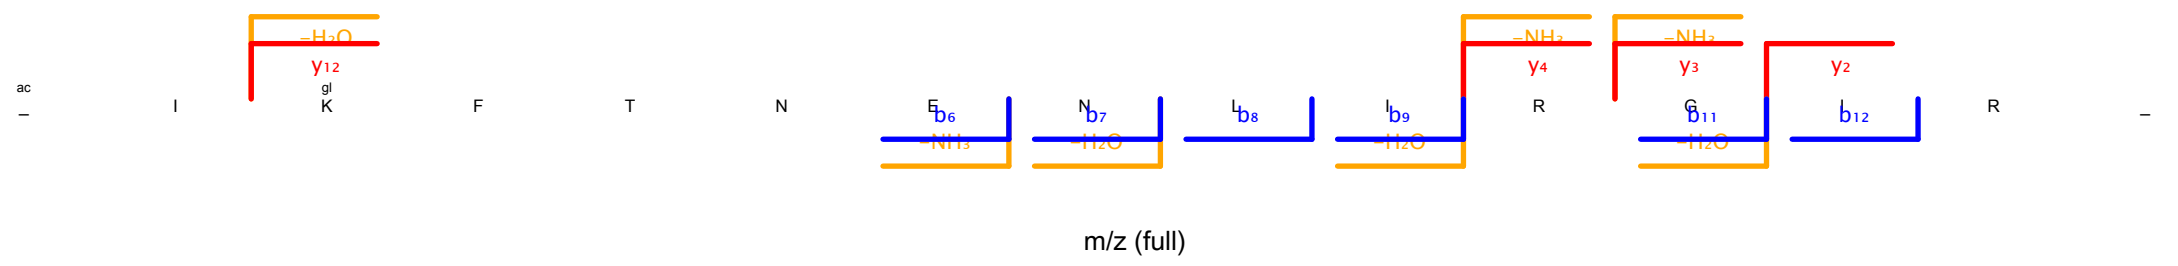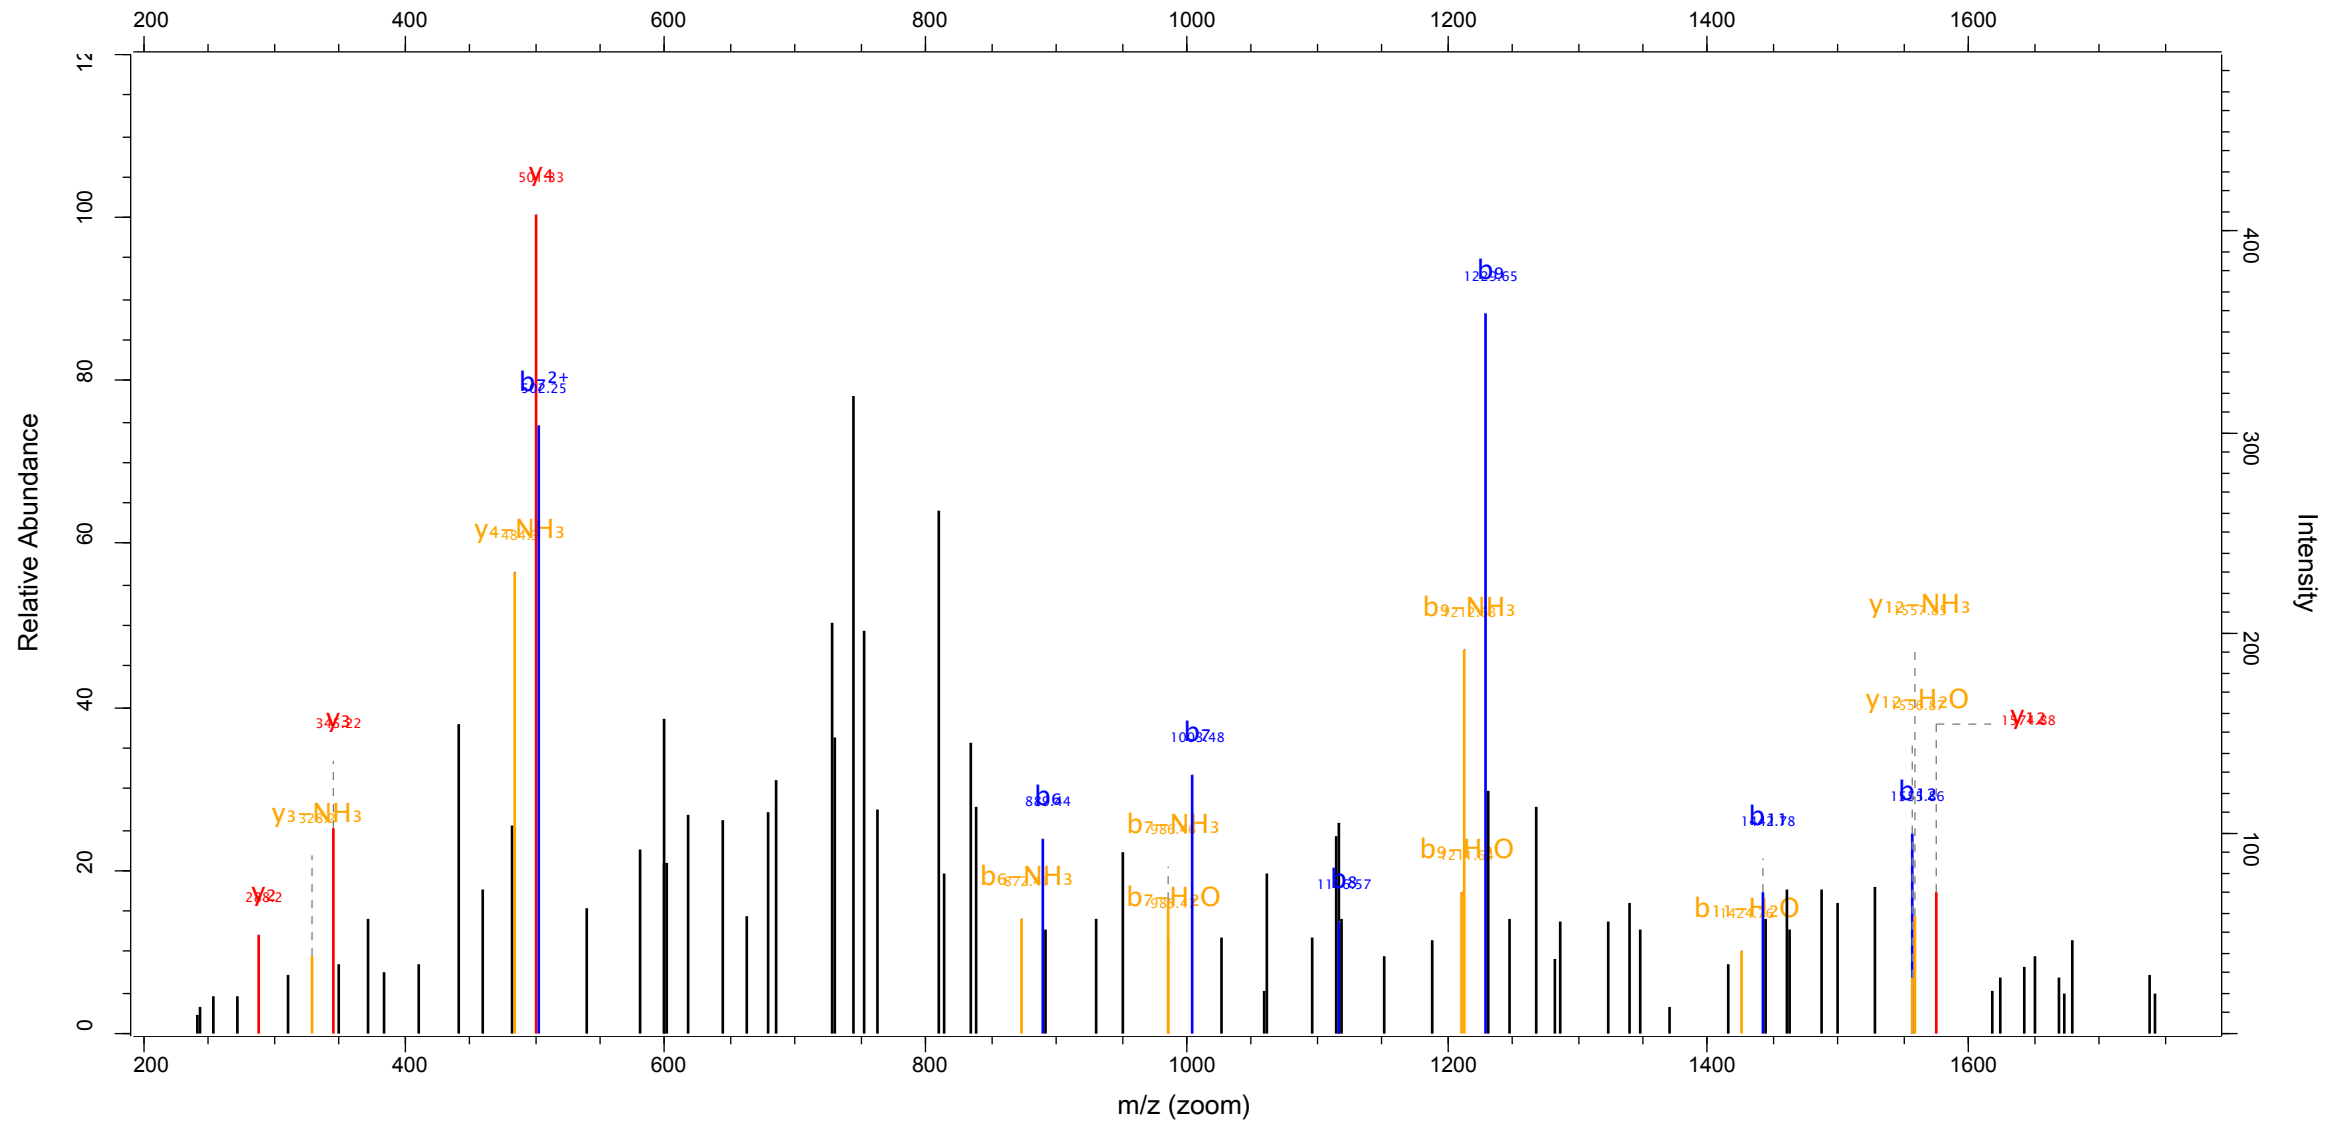

Scan number 41746 Raw file nak\_ubx4HeavySAX1\_11nov06  
 Method ITMS; CID Pepti... 114.63

GlyGly Site Id 63

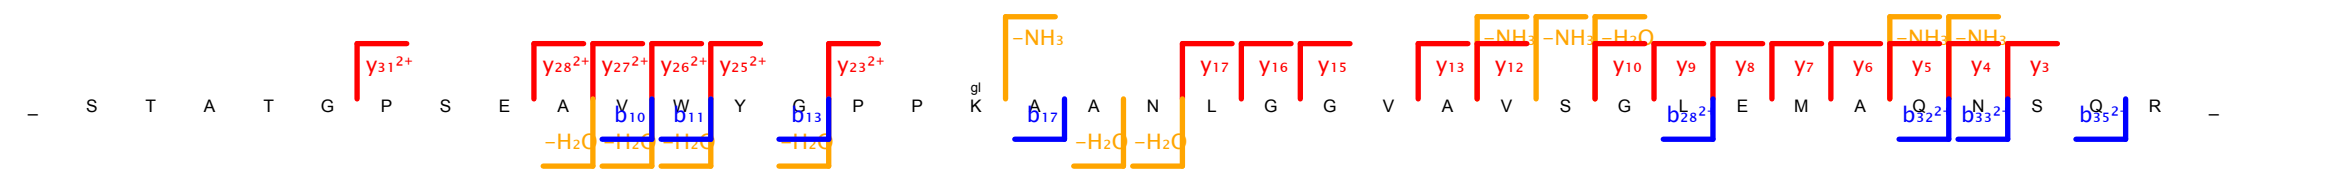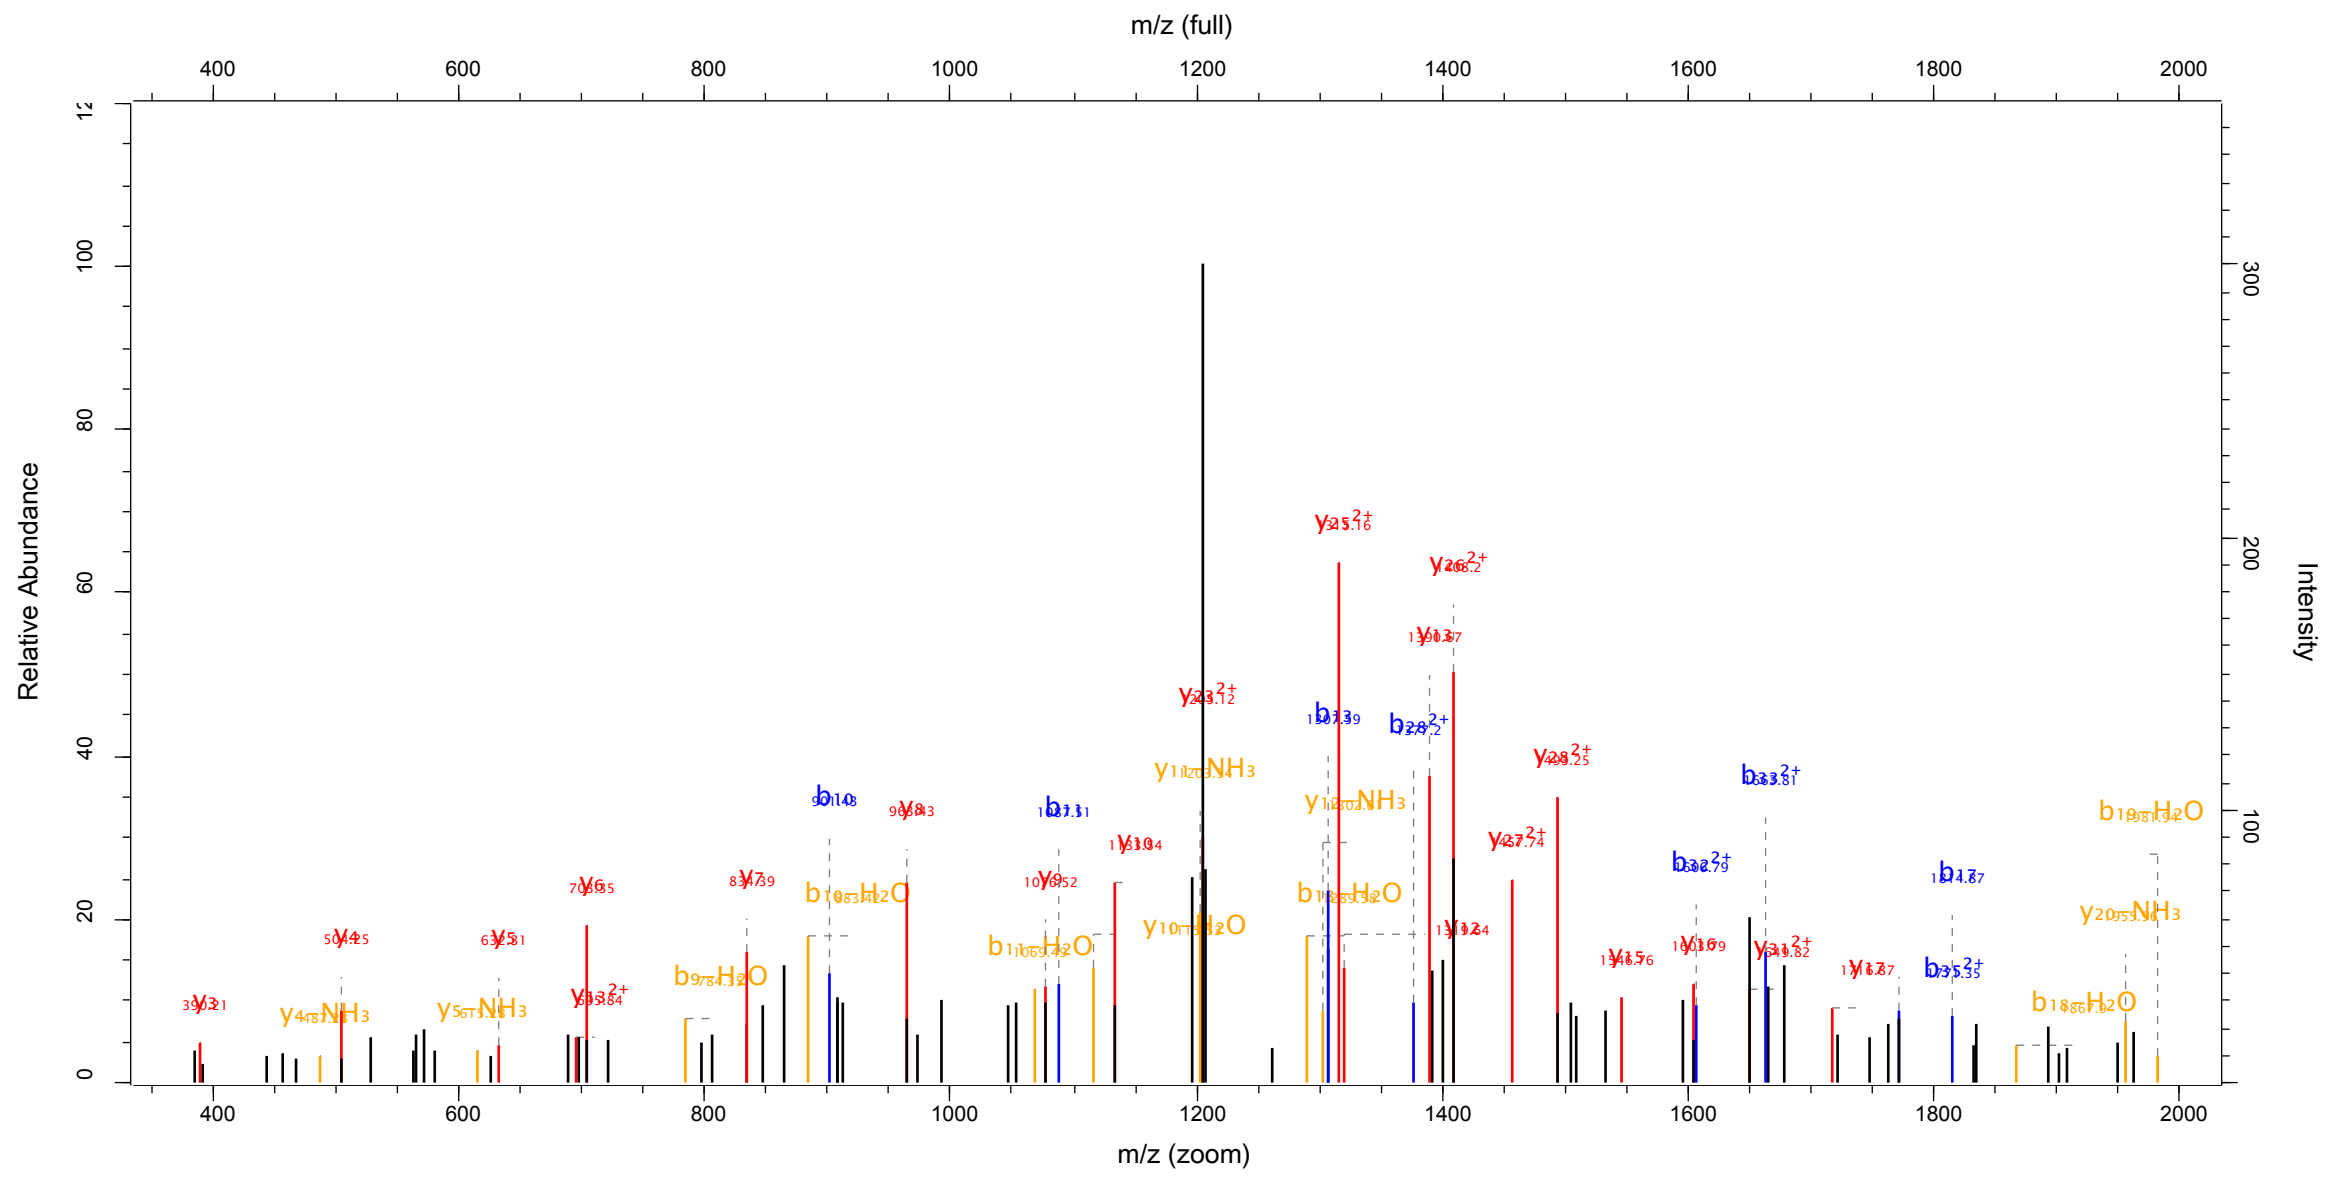

Scan number 8817 Raw file nak\_UBX2HSAX2\_8feb11\_06  
 Method ITMS; CID Pepti... 168.89

GlyGly Site Id 64

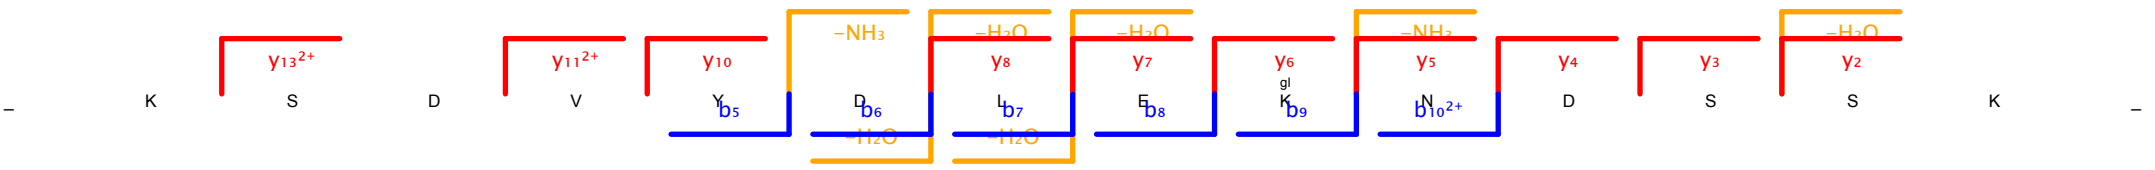

m/z (full)

200 400 600 800 1000 1200 1400 1600 1800

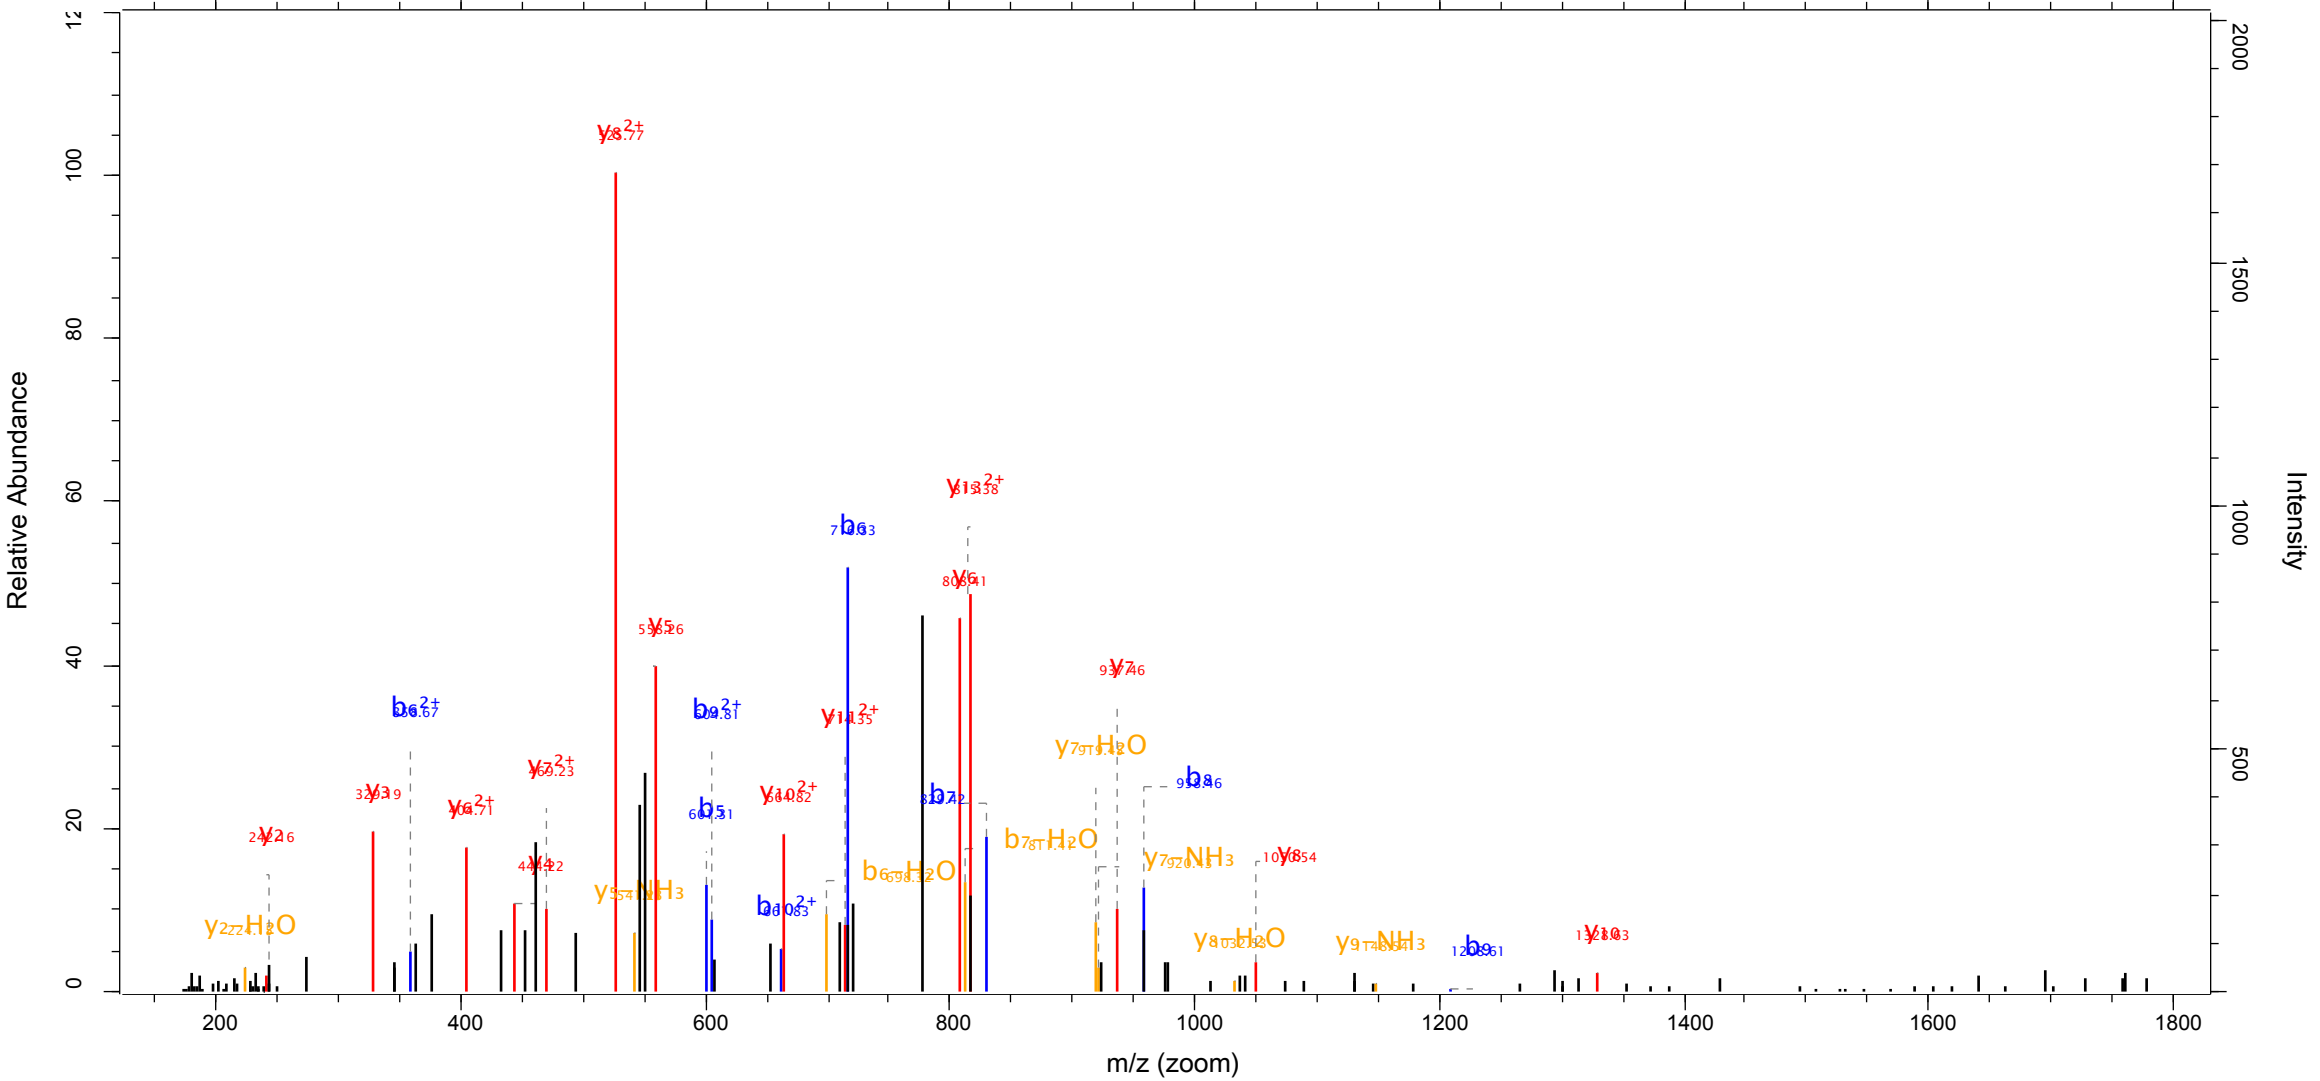

Scan number 7530 Raw file nak\_ubx5H\_SAX1\_17Sep1  
 Method ITMS; CID Pepti... 111.94

GlyGly Site Id 65

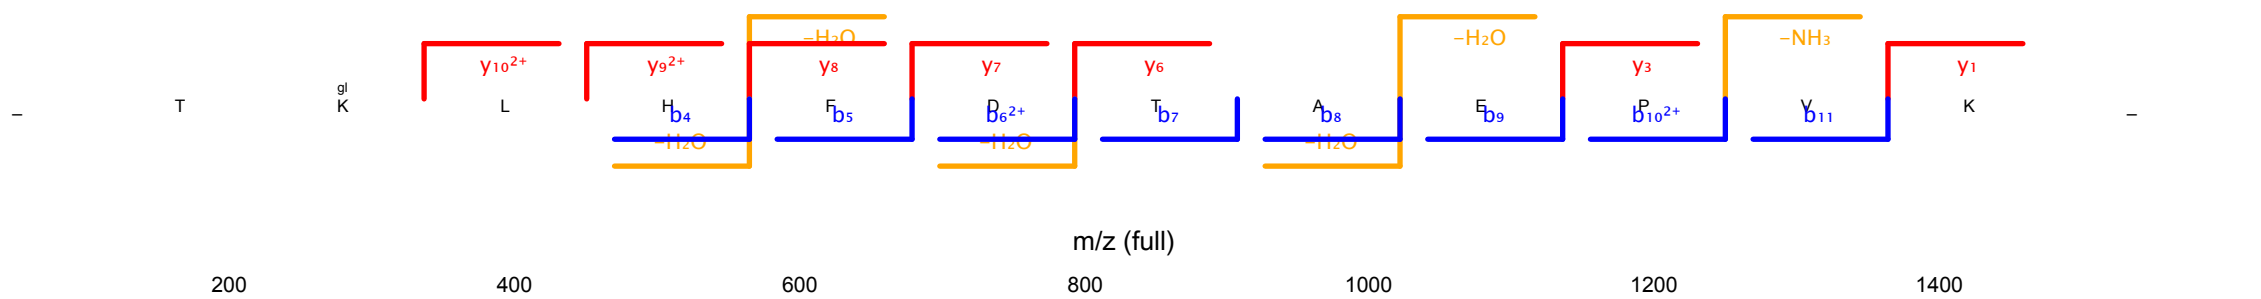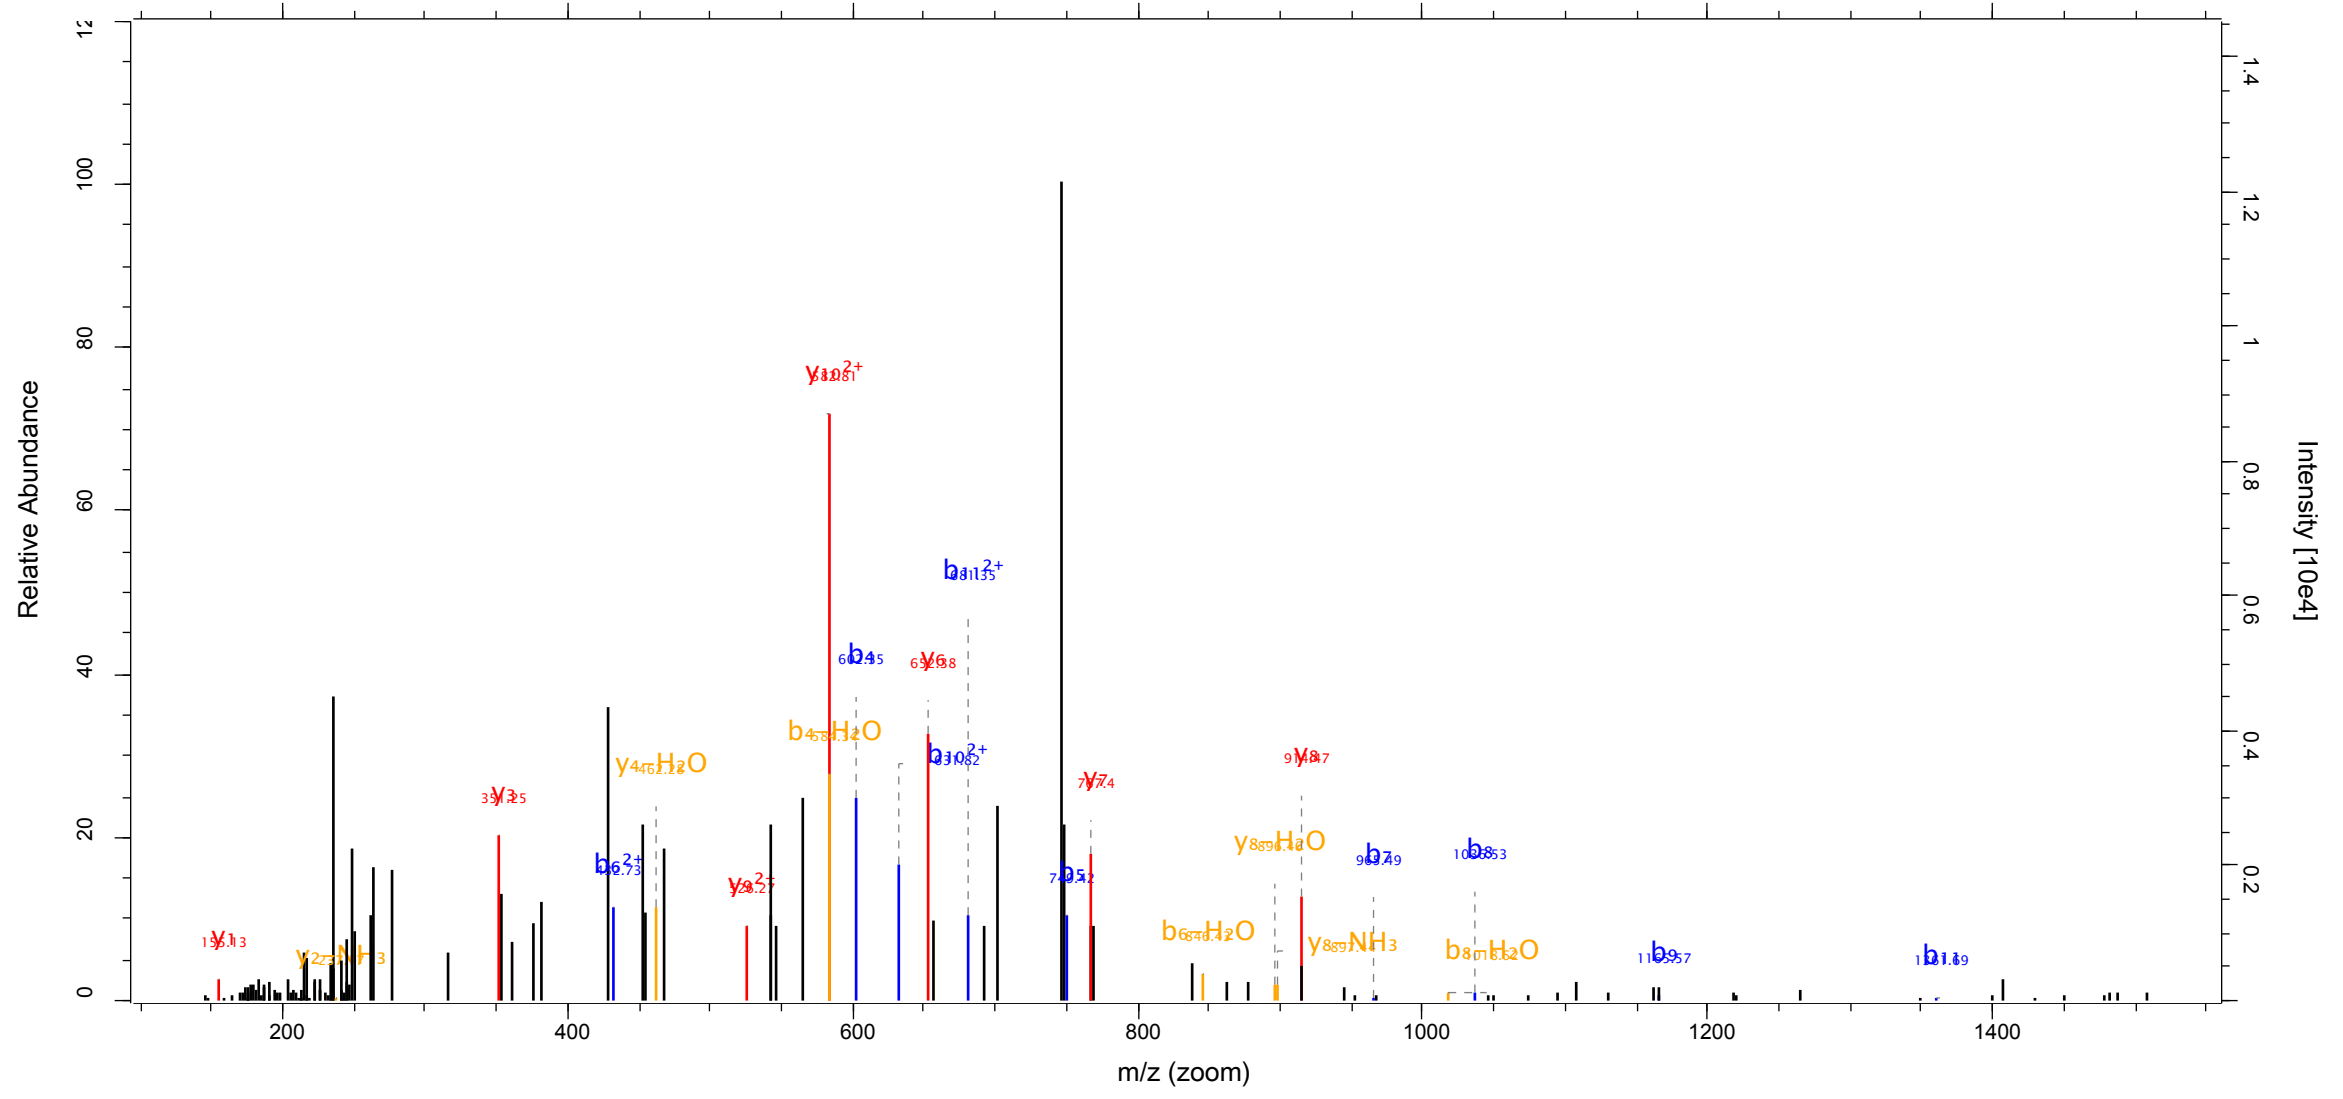

Scan number 12204 Raw file nak\_ubx4HeavySAX5\_11nov10  
 Method ITMS; CID Pepti... 126.71

GlyGly Site Id 66

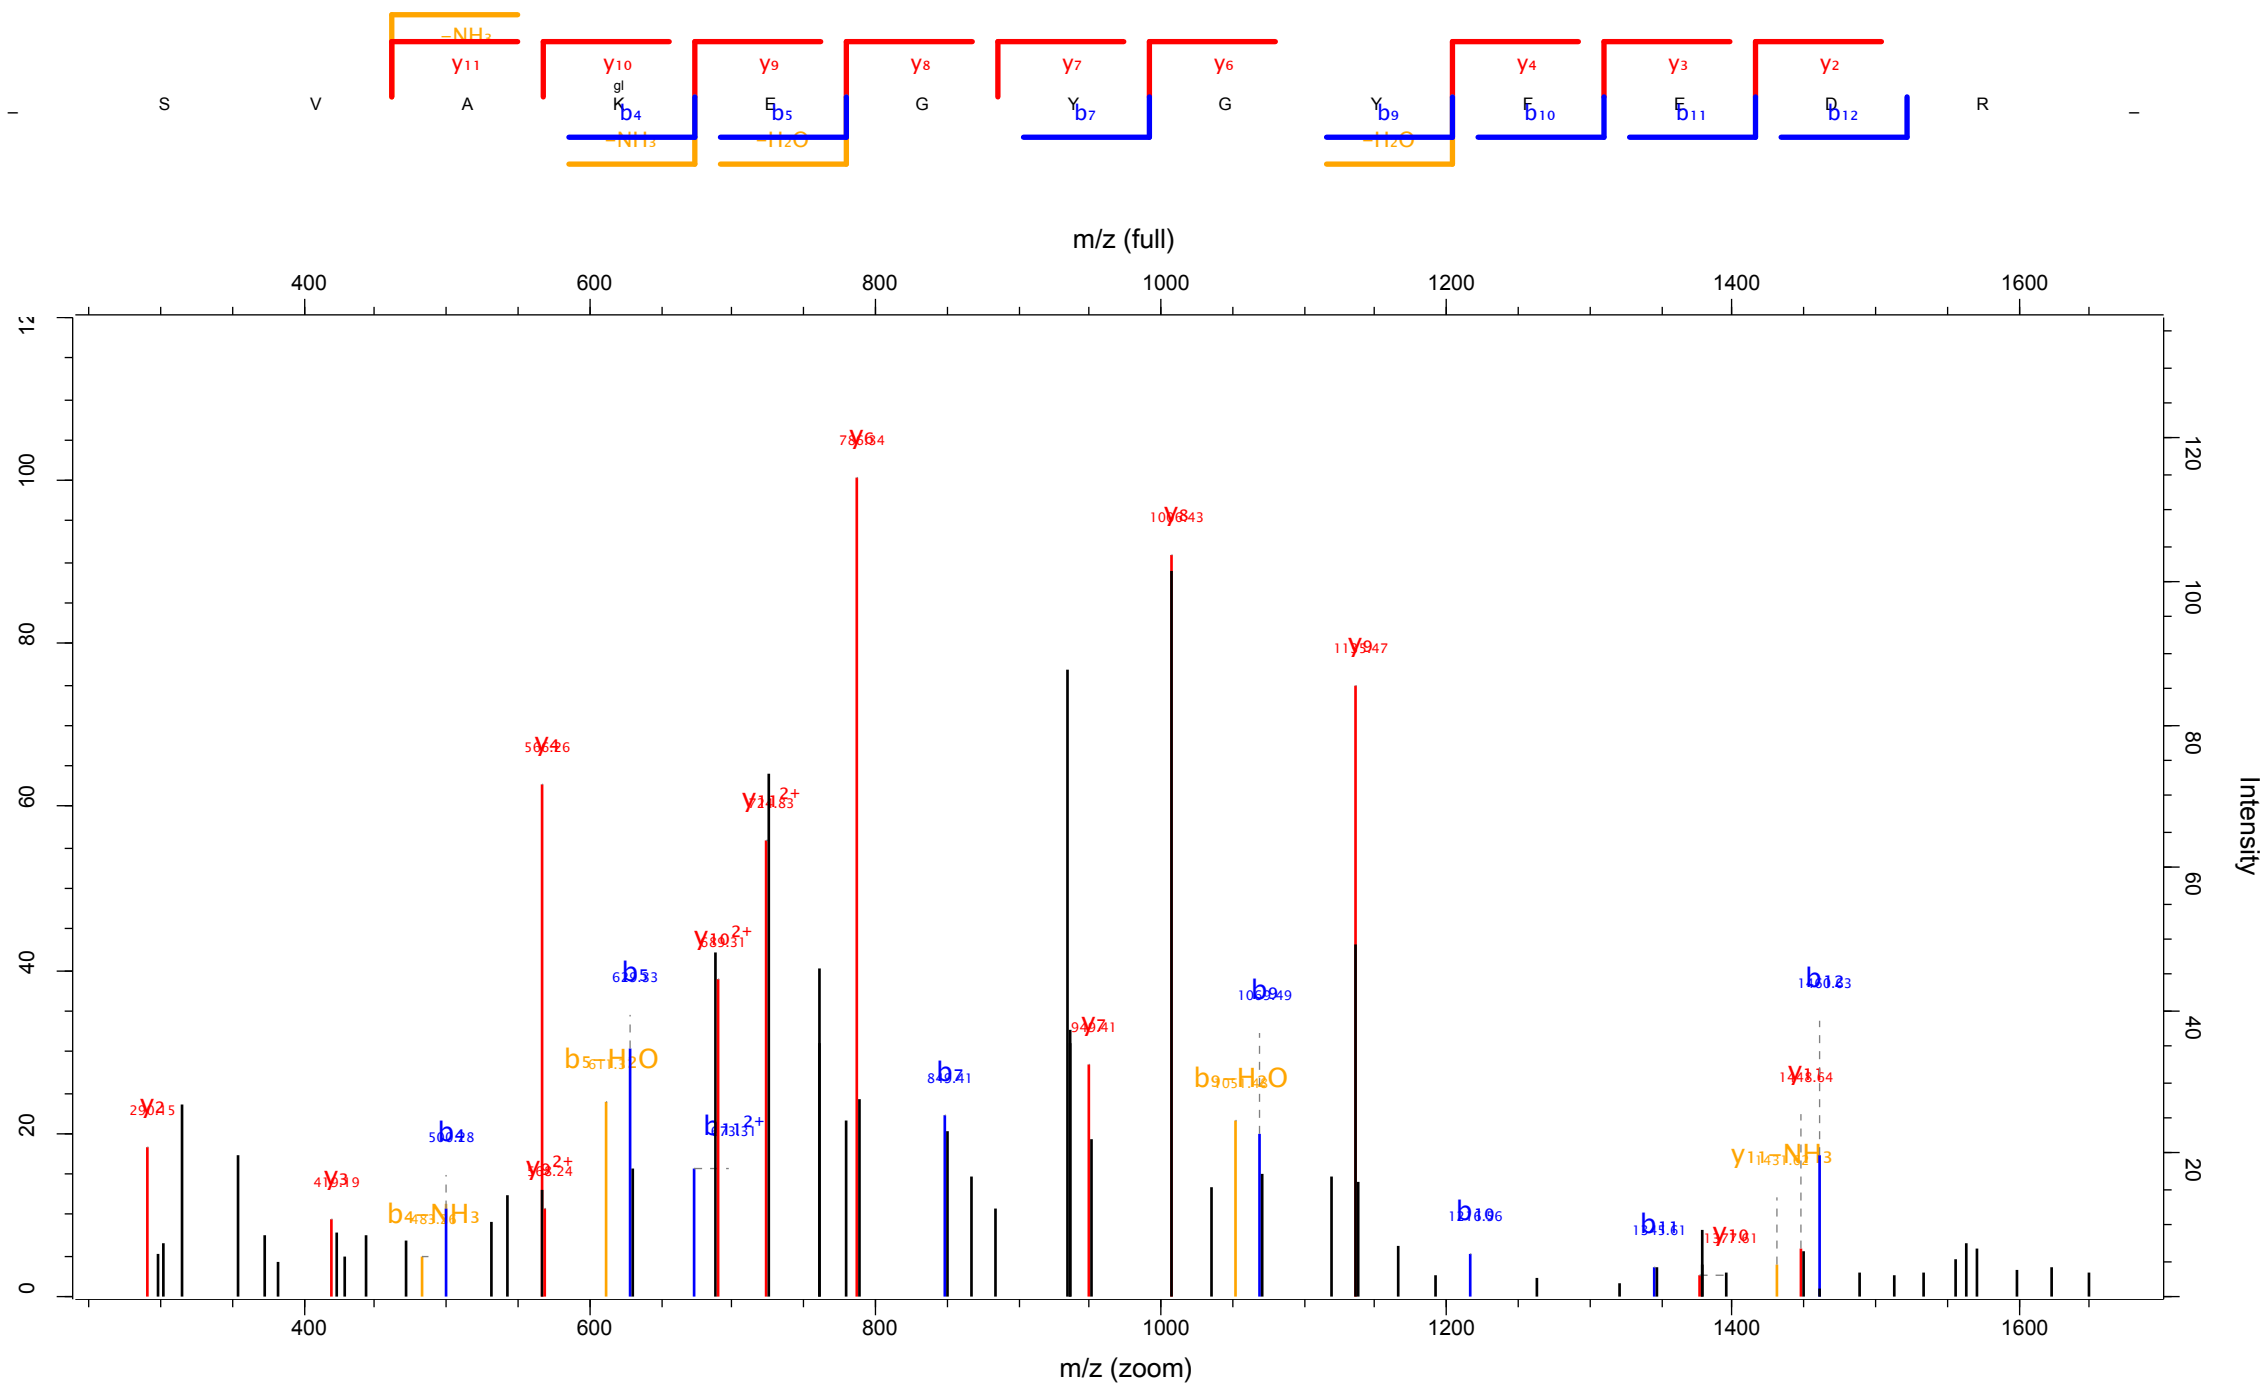

Supplement: supp_M113.030163_mcp.M113.030163-7.pdf [file supp_M113.030163_mcp.M113.030163-7.pdf]
